# Supplementary material
Source: PubMed Central journal article supplement (PMC7137638)
Supplement: NIHMS1577406-supplement-Supporting_Information.pdf [file NIHMS1577406-supplement-Supporting_Information.pdf]

## Supporting Information

# Visible Light-Induced Borylation of C–O, C–N, and C–X Bonds

Shengfei Jin, Hang. T. Dang, Graham C. Haug, Ru He, Viet D. Nguyen, Vu T. Nguyen,  
Hadi D. Arman, Kirk S. Schanze, and Oleg V. Larionov\*

Department of Chemistry, The University of Texas at San Antonio, San Antonio, Texas  
78249, United States  
oleg.larionov@utsa.edu

## Contents

|                                                             |      |
|-------------------------------------------------------------|------|
| <a href="#">Materials and experimental details</a> .....    | S1   |
| <a href="#">General procedures</a> .....                    | S2   |
| <a href="#">Mechanistic and spectroscopic studies</a> ..... | S6   |
| <a href="#">Synthesis of starting materials</a> .....       | S14  |
| <a href="#">Borylation products</a> .....                   | S37  |
| <a href="#">Computational data</a> .....                    | S140 |
| <a href="#">X-ray crystallographic data</a> .....           | S171 |
| <a href="#">NMR spectroscopic data</a> .....                | S217 |
| <a href="#">References</a> .....                            | S511 |

## Materials and experimental details

**Materials:** Anhydrous acetonitrile was distilled from ground 3Å molecular sieves under the atmosphere of nitrogen and collected fresh before use. Compounds **PTH4**,<sup>[1]</sup> **S1-S18**,<sup>[2]</sup> **S26-S29**<sup>[3]</sup> were prepared according to the previously reported procedures. The potassium salt of **PTH1** was prepared by reacting **PTH1** with potassium hexamethyldisilazide. All other chemicals were used as commercially available.

**Experimental equipment:** Glovebox work was carried out in a nitrogen-filled LC Technology Solutions LCPW-220 glovebox. Photoinduced reactions were carried out in a test-tube rack placed on a stirplate and flanked with two 36W LED lights ( $\lambda_{\text{max}} = 400$  nm, 420 nm, or 450 nm) thermostated with continuous air flow supply at 22 °C (default

method, unless otherwise specified), or without the air flow supply at 35–40 °C, allowing to carry out up to eight parallel reactions at the same time. Carrying out reactions without the air flow supply allowed to improve the yields by ~ 20%. The same improvement can also be achieved by carrying out the reaction with added water (1 equiv.)

**Purification:** Column chromatography was performed using CombiFlash Rf-200 (Teledyne-Isco) automated flash chromatography system, as well as manually. Thin layer chromatography was carried out on silica gel-coated glass plates (Merck Kieselgel 60 F254). Plates were visualized under ultraviolet light (254 nm) and using a potassium permanganate stain.

**Characterization:**  $^1\text{H}$ ,  $^{13}\text{C}$ ,  $^{11}\text{B}$ , and  $^{19}\text{F}$  NMR spectra were recorded at 500 MHz ( $^1\text{H}$ ), 125 MHz ( $^{13}\text{C}$ ), 202 MHz ( $^{31}\text{P}$ ), 470.5 MHz ( $^{19}\text{F}$ ), and 160.4 MHz ( $^{11}\text{B}$ ) on Bruker AVANCE III 500 instruments in  $\text{CDCl}_3$  or other specified deuterated solvents with and without tetramethylsilane (TMS) as an internal standard at 25 °C, unless specified otherwise. Chemical shifts ( $\delta$ ) are reported in parts per million (ppm) from tetramethylsilane ( $^1\text{H}$  and  $^{13}\text{C}$ ),  $\text{BF}_3\cdot\text{OEt}_2$  ( $^{11}\text{B}$ ), and  $\text{CFCl}_3$  ( $^{19}\text{F}$ ). Coupling constants ( $J$ ) are in Hz. Proton multiplicity is assigned using the following abbreviations: singlet (s), doublet (d), triplet (t), quartet (q), quintet (quint.), septet (sept.), multiplet (m), broad (br).

Infrared measurements were carried out neat on a Bruker Vector 22 FT-IR spectrometer fitted with a Specac diamond attenuated total reflectance (ATR) module. The UV/Vis absorption spectra were obtained on a Shimadzu UV-2600 spectrophotometer.

## General Procedures

### General procedure for the visible light-mediated photocatalytic C–O, C–N and C–X borylation (GP1)

An oven-dried 8 mL reaction tube was charged with a magnetic stir bar, substrate (0.2 mmol),  $\text{B}_2\text{pin}_2$  (0.24–1.0 mmol, 1.2–5.0 equiv.), **PTH1** (0.2–12 mol%),  $\text{Cs}_2\text{CO}_3$  (0.24–1.0 mmol, 1.2–5.0 equiv.) and  $\text{CH}_3\text{CN}$  (1.5–4.5 mL). The reaction mixture was purged with

argon via a needle extended to the mixture surface for 5 seconds. The tube was sealed with a plastic cap and then irradiated with an LED light of the appropriate wavelength (400 nm, 420 nm, or 450 nm) for 16–72 h. Water (4 mL) was added, and the reaction mixture was extracted with ethyl acetate (3 × 8 mL). The combined organic layers were dried over sodium sulfate, filtered, and concentrated. The resulting crude mixture can be purified by flash column chromatography on silica gel (6–15 minutes per column) to give the corresponding boronate ester or by GP2–GP5 to give boronic acids, organotrifluoroborates and diborylarenes.

**General procedure for the isolation as organotrifluoroborates with potassium fluoride and tartaric acid (GP2)**

To the reaction mixture was added methanol (2 mL) and then acetonitrile (2 mL), followed by a solution of potassium fluoride (0.8 mmol, 4 equiv.) in water (0.4 mL), and the mixture was stirred for 5 minutes at room temperature. A solution of L-(+)-tartaric (0.41 mmol, 2.05 equiv.) in THF (5 mL) was added dropwise to the stirring mixture over 5 minutes, resulting in formation of a white precipitate. The reaction mixture was stirred for 15 minutes, diluted with acetonitrile (5 mL) and then filtered. The flask and the filtered solids were rinsed with acetonitrile (3 × 15 mL) and the combined filtrate was concentrated. The mixture was dried azeotropically with acetonitrile (4 × 3 mL) and washed with diethyl ether (2 × 10 mL). The solid residue was dried in vacuum, acetone (50 mL) was added and the mixture was sonicated for 5 minutes and warmed up to effect dissolution if necessary. The acetone solution was passed through a Celite® pad, and the filtrate was concentrated under reduced pressure. The product was recrystallized from an acetone/diethyl ether mixture to afford the desired potassium organotrifluoroborate. For basic nitrogen group-containing substrates, the substrate was dissolved in CH<sub>3</sub>CN (10 mL) and stirred with K<sub>2</sub>CO<sub>3</sub> (10 equiv.) for 2 h then passed through a Celite® pad, and

the filtrate was concentrated under reduced pressure to afford the desired potassium organotrifluoroborate.

**General procedure for the isolation as organotrifluoroborates with potassium  
hydrogen difluoride (GP3)**

The mixture was purified by a rapid column chromatography (6–15 min) to eliminate B<sub>2</sub>pin<sub>2</sub> then methanol (5 mL) and 4.5M solution of potassium hydrogen difluoride (0.8 mmol, 4.0 equiv.) were added. The mixture was stirred for 20 minutes and the volatile components were removed under reduced pressure. The mixture was dried azeotropically with acetonitrile (4 × 3 mL) and washed with pentane (2 × 10 mL). The solid residue was dried in vacuum, acetone (50 mL) was added and the mixture was sonicated for 5 minutes and gently warmed up if necessary to effect dissolution. The acetone solution was passed through a Celite® pad, and the filtrate was concentrated under reduced pressure. The product was crystallized from an acetone/diethyl ether mixture to afford the desired potassium organotrifluoroborate. For basic nitrogen group-containing substrates, the substrate was dissolved in CH<sub>3</sub>CN (10 mL) and stirred with K<sub>2</sub>CO<sub>3</sub> (10 equiv.) for 2 h then passed through a Celite® pad, and the filtrate was concentrated under reduced pressure to afford the desired potassium organotrifluoroborate.

**General procedure for the isolation as boronic acids/organotrifluoroborates with  
methylboronic acid (GP4)**

To the mixture was added acetone (5 mL), 0.2M aqueous solution of hydrochloric acid (5 mL) and methylboronic acid (2 mmol, 10 equiv.). The reaction mixture was stirred overnight then concentrated under reduced pressure and dried azeotropically with acetonitrile (5 × 5 mL) and then with a 1 : 1 v/v acetonitrile/methanol mixture (5 × 6 mL) in heated water bath (40–45 °C). The resulting mixture was converted to

organotrifluoroborate according to GP3 or as a boronic acid, as in this procedure. Thus, the resulting solid was dissolved in a mixture of 1M aqueous solution of fructose (5 mL) and 1M aqueous solution of sodium carbonate (5 mL). Ethyl acetate (15 mL) was added, and the organic portion was separated and discarded. The aqueous phase was acidified to pH 2 using 2M aqueous solution of hydrochloric acid, then extracted with ethyl acetate ( $4 \times 10$  mL). The combined organic portions as dried over anhydrous sodium sulfate, filtered and concentrated under reduced pressure to yield the desired boronic acid.

### **General procedure for the isolation of diborylarenes with Kugelrohr distillation (GP5)**

The flask with the crude material was placed onto a rotary evaporator (IKA RV10) with a vertically aligned vapor tube. The material was then heated at 140–165 °C for 1.5–2 h under reduced pressure (vacuum pressure: 1.5 torr, KNF UN842.3FTP vacuum pump) by means of an electrothermal vacuum oven

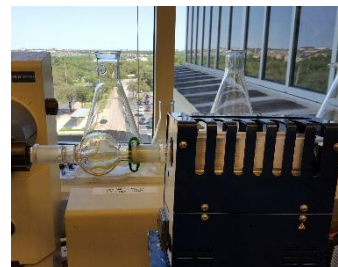

(Chem-Dry, Laboratory Devices, Inc.). The volatile by-products and the unreacted starting material (typically, ArBpin, pinacolone, B<sub>2</sub>pin<sub>2</sub>) condensed in the distillation trap adapter. The desired bisdioxaborolane remained in the distillation flask and can be further purified by recrystallization.

### **General procedure for the visible light-mediated photocatalytic C–N borylation with in situ quaternization of arylamines (GP6)**

An oven-dried 8 mL reaction tube was charged with a magnetic stir bar, aryl amine (0.2 mmol), Cs<sub>2</sub>CO<sub>3</sub> (0–0.8 mmol, 0–4 equiv.), methyl trifluoromethanesulfonate (0.24–1.28 mmol, 1.2–6.4 equiv.) and CH<sub>3</sub>CN (1.5–3 mL). The mixture was stirred for 20 minutes at room temperature before adding B<sub>2</sub>pin<sub>2</sub> (0.6–1.2 mmol, 3–6 equiv.), Cs<sub>2</sub>CO<sub>3</sub> (0.5–1.0 mmol, 2.5–5.0 equiv.), **PTH1** (5–10 mol%) and CH<sub>3</sub>CN (0.5–2 mL). The reaction mixture was

purged with argon via a needle extended to the mixture surface for 5 seconds. The tube was sealed with a plastic cap and then irradiated with an LED light of the appropriate wavelength (400 nm, 420 nm, or 450 nm) for 16–36 h. Water (4 mL) was added, and the reaction mixture was extracted with ethyl acetate (3 × 8 mL). The combined organic layers were dried over sodium sulfate, filtered, and concentrated. The resulting crude mixture can be purified by flash column chromatography on silica gel (6–15 minutes per column) to give the corresponding boronate ester or by GP2–GP5 to give boronic acids, organotrifluoroborates and diborylarenes.

### **General procedure for the synthesis of diethyl aryl phosphates (GP7)**

According to literature procedure<sup>[4]</sup>, a substituted phenol (3.1 mmol) was dissolved in carbon tetrachloride or THF (8–20 mL) and this was cooled to 0 °C, triethylamine (0.55 mL, 3.85 mmol) and diethyl phosphite or diethyl chlorophosphate (0.48 mL, 3.85 mmol) were added. After warming the solution to room temperature a white precipitate formed and this was left to stir at this temperature overnight. Water was added followed by dichloromethane and the organic phase was washed with HCl (1 M), saturated sodium chloride solution, dried over sodium sulphate and the solvent was removed under reduced pressure. The crude mixture can be purified by flash column chromatography on silica gel to give the corresponding product.

## **Mechanistic studies**

### **Excited state reduction potentials of phenothiazines**

Singlet excited state reduction potentials of phenothiazines **PTH1**, **PTH2**, and **PTH4** were calculated by the equation  $E_{ox}(PTH^{•+}/{}^1PTH^*) = E(PTH^{•+}/PTH) - E_{0-0}({}^1PTH^*)$ .<sup>[5]</sup> Reduction potentials  $E_{1/2}(PTH^{•+}/PTH)$  for phenothiazines **PTH1**, **PTH2**, and **PTH4** were determined by cyclic voltammetry. The singlet excited state energies of the phenothiazines  $E_{0-0}({}^1PTH^*)$  were determined from the intersection of the normalized emission and excitation spectra

(Figure S1).<sup>[5]</sup> For **PTH3**, the singlet excited state reduction potential (-2.51 V) was previously reported.<sup>[6]</sup>

**Table S1.** Ground and excited state reduction potentials and singlet excited state energies of phenothiazines **PTH1**, **PTH2**, and **PTH4**.<sup>a</sup>

| Phenothiazine                                                                                    | $E_{1/2}(\text{PTH}^{\bullet+}/\text{PTH}), \text{V}$ | $E_{0-0}({}^1\text{PTH}^*), \text{eV}$ | $E_{\text{ox}}(\text{PTH}^{\bullet+}/\text{PTH}^*), \text{V}$ |
|--------------------------------------------------------------------------------------------------|-------------------------------------------------------|----------------------------------------|---------------------------------------------------------------|
| 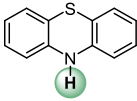<br><b>PTH1</b> | 0.60                                                  | 3.20                                   | -2.60                                                         |
| <br><b>PTH2</b> | 0.70                                                  | 3.28                                   | -2.58                                                         |
| <br><b>PTH4</b> | 0.48                                                  | 3.17                                   | -2.71                                                         |

<sup>a</sup> Reduction potentials are reported for solutions in acetonitrile vs. SCE.

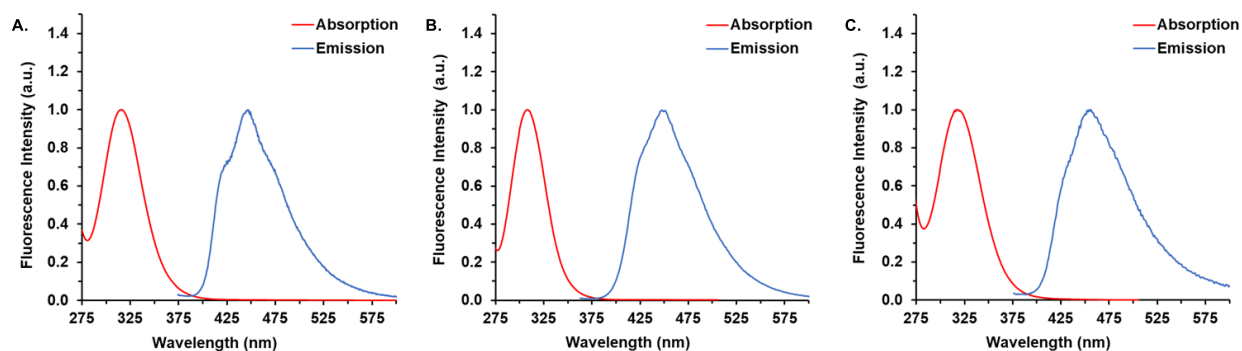

**Figure S1.** Normalized emission and excitation spectra. **A.** **PTH1**. **B.** **PTH2**. **C.** **PTH4**.

### Cyclic voltammetry studies

Cyclic voltammetry (CV) measurements were performed on a CHI 650D potentiostat using a three-electrode cell with a glassy-carbon working electrode, a Ag|AgCl (1M KCl) reference electrode and a platinum counter electrode. CV was conducted at a scan rate of 50 mV s<sup>-1</sup> in anhydrous degassed acetonitrile with tetrabutylammonium hexafluorophosphate as an electrolyte. Inflection-point potentials ( $E_{\text{red}}$ ) were used to

characterize irreversible redox processes, since they were shown to provide the best approximation of standard electrochemical potentials for irreversible redox systems.<sup>[7]</sup> The half-wave potential for the Fc<sup>+</sup>/Fc redox couple was measured to ensure consistency, and a value of  $E_{1/2} = 0.39$  V vs. Ag|AgCl was recorded. All measured potentials vs. Ag|AgCl were converted to the potentials vs. SCE by subtracting 0.02 V.<sup>[8]</sup>

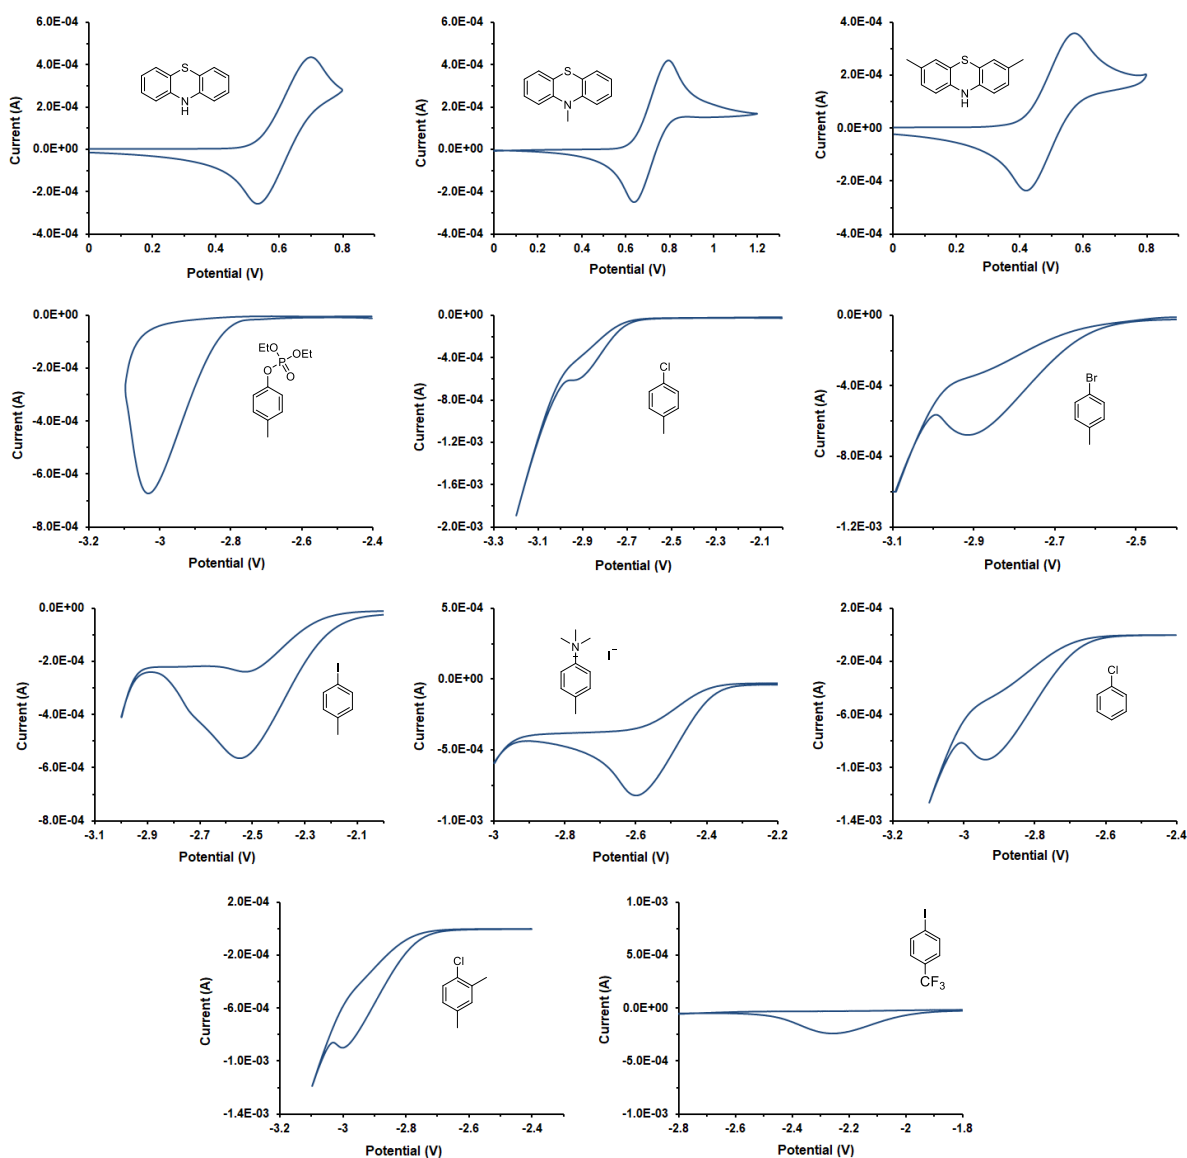

**Figure S2.** Cyclic voltammograms for phenothiazine catalysts and representative substrates.



**Influence of additives on redox behavior of substrates:** For *p*-tolyl diethyl phosphate, *p*-chlorotoluene, and *p*-bromotoluene, reduction potentials were also measured in the presence of B<sub>2</sub>Pin<sub>2</sub> (3 equiv., commensurate with the molar ratio in a reaction mixture) or Cs<sub>2</sub>CO<sub>3</sub> (3 equiv., commensurate with the molar ratio in a reaction mixture), and both B<sub>2</sub>Pin<sub>2</sub> and Cs<sub>2</sub>CO<sub>3</sub> (3 equiv. for both, commensurate with the molar ratio in a reaction mixture) in order to ensure that their reduction potentials are not affected by the additives. In all cases, the reduction potentials remained unchanged, indicating that B<sub>2</sub>Pin<sub>2</sub> and Cs<sub>2</sub>CO<sub>3</sub> do not have any influence on the redox properties of the substrates.

#### **<sup>1</sup>H NMR spectroscopic studies of PTH1 behavior in the presence of B<sub>2</sub>pin<sub>2</sub>, Cs<sub>2</sub>CO<sub>3</sub>, and crown ethers**

<sup>1</sup>H NMR spectra of PTH1, potassium salt of PTH1 (PTH1-K), as well as PTH1 (0.05M) in the presence of Cs<sub>2</sub>CO<sub>3</sub>, B<sub>2</sub>pin<sub>2</sub>, and crown ethers 18-crown-6 and 12-crown-4 were recorded in acetonitrile. An aliquot of solutions of PTH1 (0.05M) in the presence of Cs<sub>2</sub>CO<sub>3</sub> (0.025M), B<sub>2</sub>pin<sub>2</sub> (0.5M), and crown ethers 18-crown-6 and 12-crown-4 (0.025M) was placed in an NMR tube that contained a sealed coaxial capillary with *d*<sub>12</sub>-cyclohexane.

#### **UV/Vis measurements of PTH1 in the presence of B<sub>2</sub>pin<sub>2</sub> and cesium carbonate and the potassium salt of PTH1 (PTH1-K)**

The UV/Vis spectra of PTH1 and of the potassium salt of PTH1 (PTH1-K) are shown in Figure S3.A. Deprotonation of PTH1 leads to significant shift of the absorption to the red with a strong shoulder in the 430–500 nm range that results in a bright yellow color of the salt even in a dilute (0.4 mM) solution. PTH1, on the other hand, lacks strong absorption in the range, as evidenced by the large difference in molar attenuation coefficients for PTH1 ( $\epsilon = 7.5 \text{ M}^{-1}\cdot\text{cm}^{-1}$ ) and salt PTH1-K ( $\epsilon = 2875 \text{ M}^{-1}\cdot\text{cm}^{-1}$ ) at 440 nm. Addition of cesium carbonate to PTH1 or B<sub>2</sub>pin<sub>2</sub> to PTH1 did not lead to any changes in the UV/Vis spectrum.

On the other hand, addition of both  $B_2pin_2$  and cesium carbonate led to a weak bathochromic shift (Figure S3.B). However, the absorptions of the phenothiazine anion (**PTH1-K**) were not present in the UV/Vis spectrum, indicating that the phenothiazine anion is not formed in the borylation reaction mixture, in line with the conclusions made from the  $^1H$  NMR study of **PTH1** solutions in the presence of  $B_2pin_2$  and cesium carbonate.

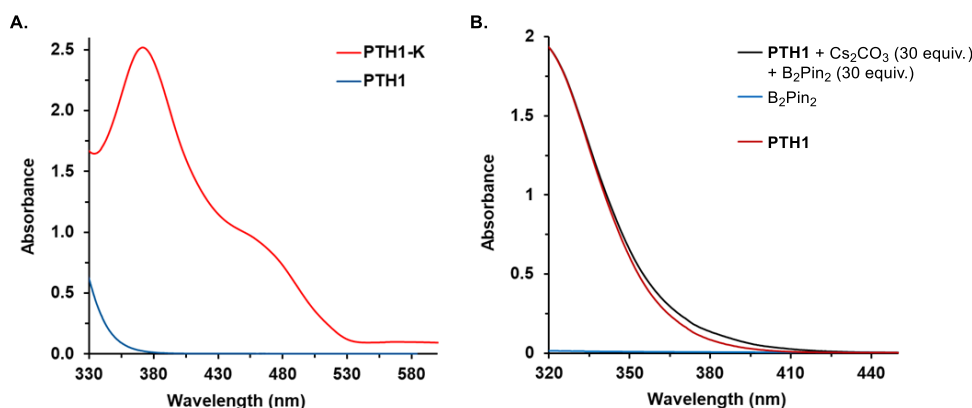

**Figure S3.** UV/Vis absorption studies of **PTH1** speciation in acetonitrile solution in the presence of  $B_2pin_2$  and cesium carbonate. **A.** UV/Vis absorption spectra of phenothiazine (**PTH1**) and the potassium salt of phenothiazine (**PTH1-K**) in acetonitrile at 0.4mM. **B.** UV/Vis absorption spectra of phenothiazine (**PTH1**) in the absence and in the presence of  $B_2pin_2$  and cesium carbonate in acetonitrile at 0.4mM for **PTH1**. The ratio of concentrations of  $B_2pin_2$  and cesium carbonate to the concentration of **PTH1** (30 : 1) corresponds to the initial concentration ratios of the reagents in the borylation reaction.

### Fluorescence quenching measurements with **PTH1** and **PTH1/Cs<sub>2</sub>CO<sub>3</sub>/18-crown-6**

The steady-state fluorescence emission spectra were acquired on an Edinburgh FLS1000 (Edinburgh Instruments). Fluorescence quenching experiments were carried out with 0.4mM solutions of **PTH1** in anhydrous and degassed acetonitrile in the absence and in the presence of cesium carbonate (30 equiv.) and 18-crown-6 (0.012M) to match the reactant ratios in the borylation reaction. Preliminary experiments were carried out with

18-crown-6 in the absence of cesium carbonate and with cesium carbonate in the absence of 18-crown-6 to exclude the influence of these additives on the fluorescence of PTH1.

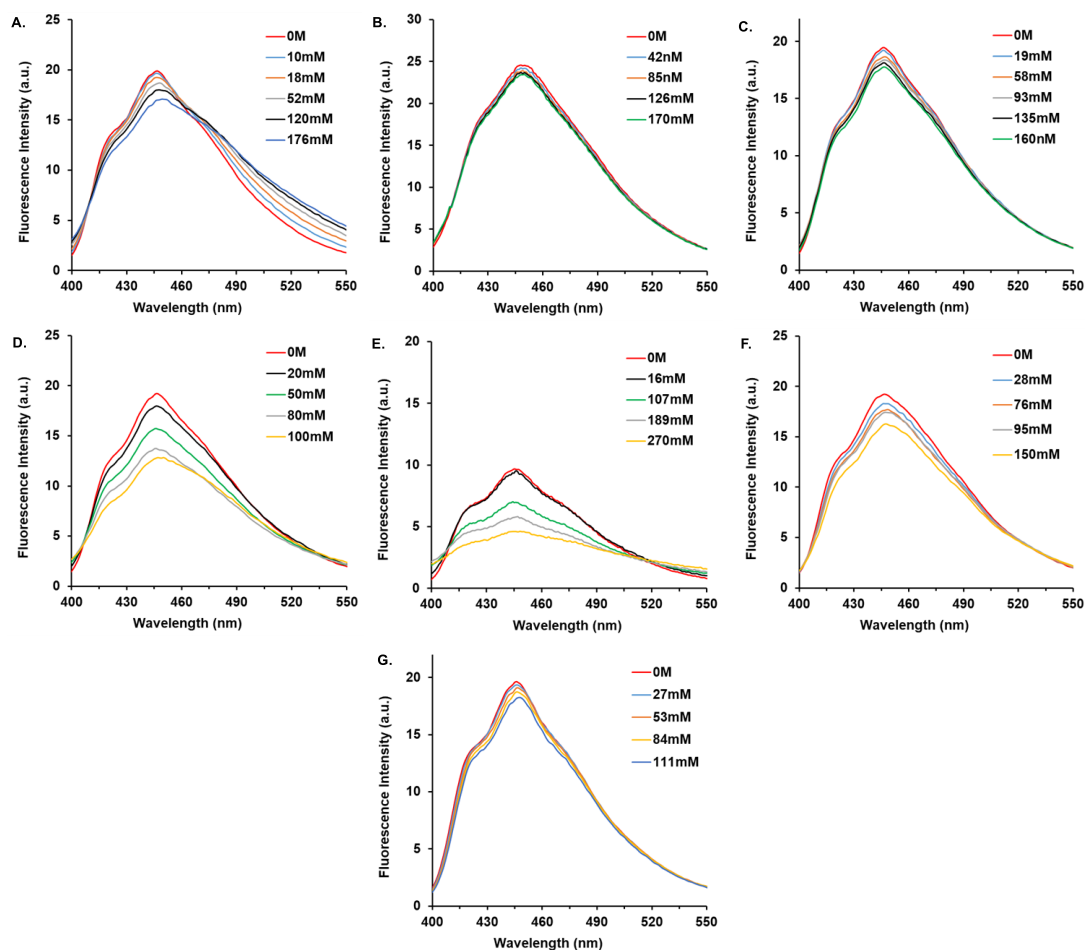

**Figure S4.** Fluorescence spectra of PTH1 with substrates added at various concentrations. The corresponding Stern-Vollmer graphs are shown in Figure 3 in the paper. **A.** In the presence of cesium carbonate and 18-crown-6 with phosphate ester **117** as a quencher. **B.** In the presence of cesium carbonate and 18-crown-6 with *p*-chlorotoluene as a quencher. **C.** In the presence of cesium carbonate and 18-crown-6 with *p*-bromotoluene as a quencher. **D.** In the presence of cesium carbonate and 18-crown-6 with *p*-iodotoluene as a quencher. **E.** In the absence of cesium carbonate and 18-crown-6 with *p*-iodotoluene as a quencher. **F.** In the presence of cesium carbonate and 18-crown-6 with phenyltrimethylammonium iodide as a quencher. **G.** In the absence of cesium carbonate and 18-crown-6 with phenyltrimethylammonium iodide as a quencher.

## Radical clock experiments

The general procedure GP1 was followed with phosphate ester **119** (57 mg, 0.2 mmol), B<sub>2</sub>pin<sub>2</sub> (3.0, 6.0 or 10.0 equiv.), Cs<sub>2</sub>CO<sub>3</sub> (197 mg, 0.6 mmol, 3.0 equiv.), PTH1 (4.0 mg, 0.02 mmol, 10 mol%) and CH<sub>3</sub>CN (2 mL). The yields of products **120** and **121** were determined by <sup>1</sup>H NMR using 1,4-dimethoxybenzene as an internal standard.

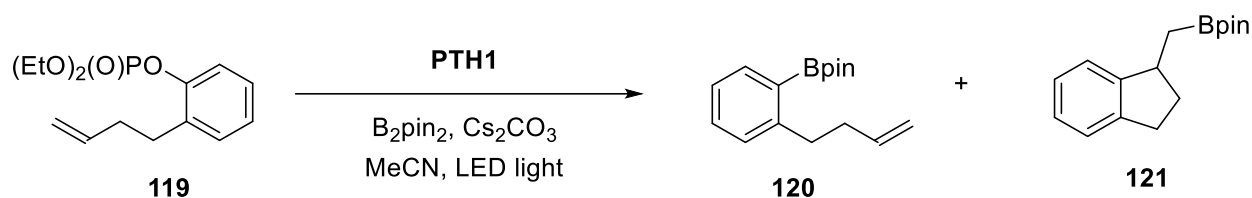

Given that  $k_{121} = 4.0 \times 10^8 \text{ s}^{-1}$ ,<sup>[9]</sup> experimental data (Table S2) and linear fitting analysis (Figure S5) produce  $k_{120} = 1.1 \times 10^8 \text{ s}^{-1}$ .

Given that  $k_{121} = 4.0 \times 10^8 \text{ s}^{-1}$ ,<sup>[9]</sup> experimental data (Table S2) and linear fitting analysis (Figure S5) produce  $k_{120} = 1.1 \times 10^8 \text{ s}^{-1}$ .

**Table S2.** Experimental data for the radical clock experiments with phosphate ester **119**.

| [ <b>120</b> ]/[ <b>121</b> ] ratio | [B <sub>2</sub> pin <sub>2</sub> ] <sub>start</sub> , M | [B <sub>2</sub> pin <sub>2</sub> ] <sub>end</sub> , M | [B <sub>2</sub> pin <sub>2</sub> ], M | [B <sub>2</sub> pin <sub>2</sub> ]/k <sub>121</sub> ratio, M·s |
|-------------------------------------|---------------------------------------------------------|-------------------------------------------------------|---------------------------------------|----------------------------------------------------------------|
| 0.055556                            | 0.3                                                     | 0.27                                                  | 0.285                                 | 7.125E-10                                                      |
| 0.125                               | 0.6                                                     | 0.57                                                  | 0.585                                 | 1.4625E-09                                                     |
| 0.25                                | 1                                                       | 0.97                                                  | 0.985                                 | 2.4625E-09                                                     |

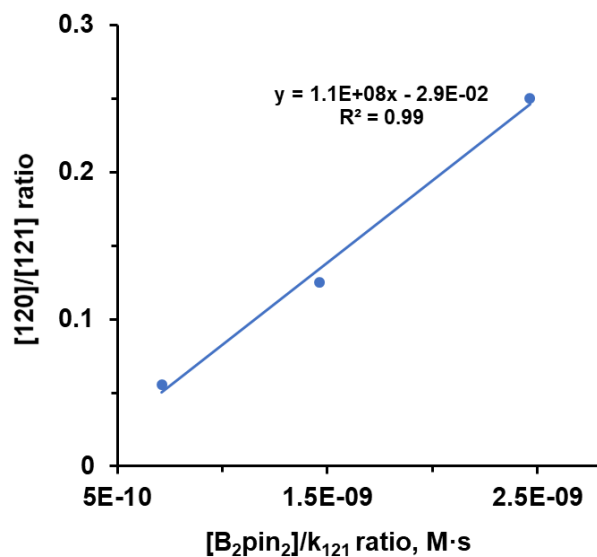

**Figure S5.** Linear fitting analysis for the radical clock experiments with phosphate ester **119**.

**Table S3.** Influence of added water on the borylation reaction performance. <sup>a</sup>

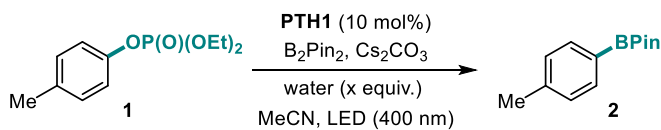

| Entry | Water (x equiv.) | Yield, % |
|-------|------------------|----------|
| 1     | 0                | 41       |
| 2     | 0.5              | 71       |
| 3     | 1                | 73       |

<sup>a</sup> The reaction was carried out as described in GP1 with phosphate **1** (0.2 mmol), **PTH1** (10 mol%),  $B_2Pin_2$  (0.6 mmol),  $Cs_2CO_3$  (0.6 mmol), MeCN (2 mL), LED light (400 nm), for 12 h. The yields were determined by  $^1H$  NMR spectroscopy with 1,4-dimethoxybenzene as an internal standard.

## Synthesis of starting materials

### Diethyl (4-(2-(4-methoxyphenyl)propan-2-yl)phenyl) phosphate (S1)

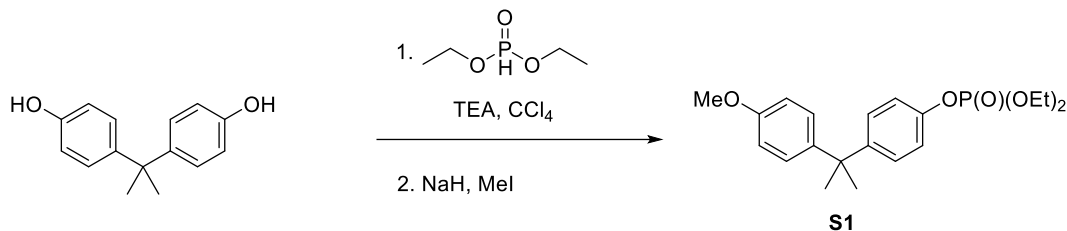

The general procedure GP7 was followed with 4,4'-(propane-2,2-diyl)diphenol (878 mg, 3.85 mmol), triethylamine (0.55 mL, 3.85 mmol), diethyl phosphite (0.48 mL, 3.85 mmol), THF (10 mL) and carbon tetrachloride (10 mL). The mixture was stirred at room temperature overnight. Purification flash chromatography on silica gel (EtOAc/hexane, 3 : 2 v/v) afforded diethyl (4-(2-(4-methoxyphenyl)propan-2-yl)phenyl) phosphate (1.09 g, 78%) as a colorless oil.

The monophosphate was dissolved in THF (50 mL) and cooled to 0 °C then NaH (4.42 mmol, 1.15 equiv.) was added slowly to the solution under nitrogen. The mixture was stirred for 30 minutes then added MeI (11.55 mmol, 3 equiv.). The mixture was stirred at room temperature for 2 h, concentrated, and 50 mL of ethyl acetate and 30 mL of water were added. The two layers were separated, and the aqueous layer was extracted with ethyl acetate (3 × 50 mL). The combined organic extracts were washed with brine, dried over anhydrous sodium sulfate, filtered, and concentrated. The residue was purified by column chromatography over silica gel (EtOAc/hexane, 1 : 1 v/v) to afford compound **S1** (837 mg, 60%) a colorless oil.

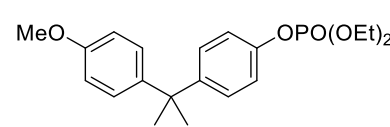

<sup>1</sup>H NMR (500 MHz, CDCl<sub>3</sub>): 7.17 (2 H, d, *J* = 8.7 Hz), 7.12 (2 H, d, *J* = 8.8 Hz), 7.09 (2 H, d, *J* = 8.8 Hz), 6.80 (2 H, d, *J* = 8.8 Hz), 4.21 (4 H, pt, *J* = 7.1, 3.0 Hz), 3.78 (3 H, s), 1.63 (6 H, s), 1.34 (6 H, t, *J* = 7.1 Hz) ppm. –

<sup>13</sup>C NMR (125 MHz, CDCl<sub>3</sub>): 157.6, 148.6 (d, *J* = 7.1 Hz), 147.8, 142.6, 128.1, 127.8, 119.4 (d, *J* = 4.7 Hz), 113.4, 64.63, 64.58, 55.3, 42.1, 31.1, 16.23, 16.17 ppm. –<sup>31</sup>P NMR (202 Hz, CDCl<sub>3</sub>):

-6.1 ppm. – IR: 2970, 1747, 1614, 1506, 1445, 1369, 1297, 1218, 1176, 1100, 1030, 972, 888 cm<sup>-1</sup>. – HRMS: calcd for C<sub>20</sub>H<sub>28</sub>O<sub>5</sub>P: 379.1669, found 379.1666 [M+H<sup>+</sup>].

### *tert*-Butyl (4-((diethoxyphosphoryl)oxy)phenyl)carbamate (**S122**)

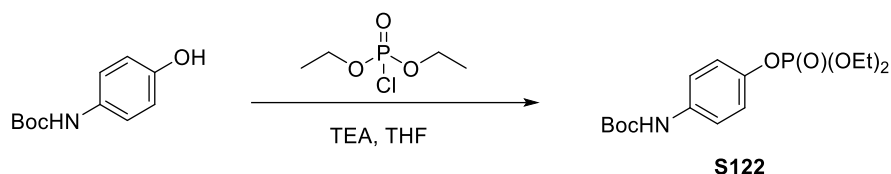

The general procedure GP7 was followed with *tert*-butyl (4-hydroxyphenyl)carbamate (848 mg, 3.1 mmol), triethylamine (0.55 mL, 3.85 mmol), diethyl chlorophosphate (0.48 mL, 3.85 mmol) and THF (10 mL). The mixture was stirred at room temperature overnight. Purification flash chromatography on silica gel (EtOAc/hexane, 2 : 3 v/v) afforded product **S122** (802 mg, 75%) as a colorless oil.

<sup>1</sup>H NMR (500 MHz, CDCl<sub>3</sub>): 7.31 (2 H, d, *J* = 8.4 Hz), 7.11 (2 H, d, *J* = 5.9 Hz), 6.69 (1 H, s), 4.24–4.12 (4 H, m), 1.48 (9 H, q, *J* = 3.3, 2.8 Hz), 1.32 (6 H, dd, *J* = 9.3, 4.9 Hz) ppm. – <sup>13</sup>C NMR (125 MHz, CDCl<sub>3</sub>): 153.0, 146.1, 135.6, 120.5, 119.9, 80.6, 64.6 (d, *J* = 6.2 Hz), 28.4, 16.2 (d, *J* = 6.7 Hz) ppm. – <sup>31</sup>P NMR (202 Hz, CDCl<sub>3</sub>): -6.1 ppm. – IR: 2980, 1720, 1606, 1357, 1508, 1455, 1409, 1392, 1367, 1311, 1261, 1156, 1026, 960 cm<sup>-1</sup>. – HRMS: calcd for C<sub>15</sub>H<sub>28</sub>N<sub>2</sub>O<sub>6</sub>P: 363.1679, found 363.1684 [M+NH<sub>4</sub><sup>+</sup>].

### Diethyl (3-fluoro-4-methylphenyl) phosphate (**S2**)

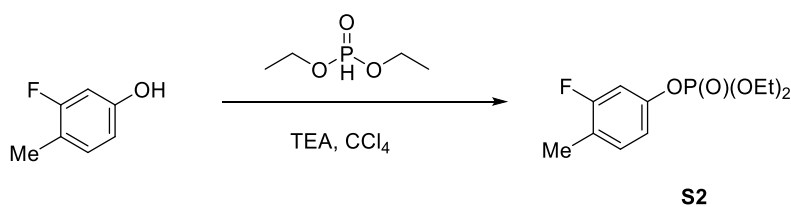

The general procedure GP7 was followed with 3-fluoro-4-methylphenol (391 mg, 3.1 mmol), triethylamine (0.55 mL, 3.85 mmol), diethyl phosphite (0.48 mL, 3.85 mmol) and

carbon tetrachloride (8 mL). The mixture was stirred at room temperature overnight. Purification flash chromatography on silica gel (EtOAc/hexane, 1 : 1 v/v) afforded product **S2** (700 mg, 89%) as a colorless oil.

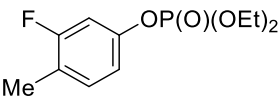
<sup>1</sup>H NMR (500 MHz, CDCl<sub>3</sub>): 7.11 (1 H, t, *J* = 8.5 Hz), 6.92 (1 H, s), 6.90 (1 H, s), 4.29–4.12 (4 H, m), 2.22 (3 H, s), 1.34 (6 H, t, *J* = 7.4 Hz) ppm. – <sup>13</sup>C NMR (125 MHz, CDCl<sub>3</sub>): 161.1 (d, *J* = 246.4 Hz), 149.4 (dd, *J* = 11.0, 6.8 Hz), 131.7 (d, *J* = 6.4 Hz), 121.6 (d, *J* = 17.2 Hz), 115.5 (t, *J* = 4.3 Hz), 107.8 (dd, *J* = 25.6, 5.3 Hz), 64.8 (d, *J* = 6.1 Hz), 16.2 (d, *J* = 6.6 Hz), 14.1 (d, *J* = 3.0 Hz) ppm. – <sup>19</sup>F NMR (470.5 Hz, CDCl<sub>3</sub>): -114.0 (t, *J* = 9.4 Hz) ppm. – <sup>31</sup>P NMR (202 Hz, CDCl<sub>3</sub>): -6.4 ppm. – IR: 3443, 2113, 1737, 1634, 1580, 1456, 1382, 1214, 1207, 1158, 1028, 975 cm<sup>-1</sup>. – HRMS: calcd for C<sub>17</sub>H<sub>2</sub>NO<sub>5</sub>P: 303.0992, found 303.0993 [M+H<sup>+</sup>].

### Diethyl (4-(4,4,5,5-tetramethyl-1,3,2-dioxaborolan-2-yl)phenyl) phosphate (**S3**)

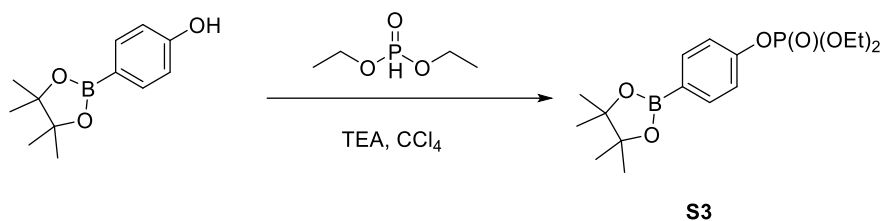

The general procedure GP7 was followed with (4-(4,4,5,5-tetramethyl-1,3,2-dioxaborolan-2-yl)phenol (682 mg, 3.1 mmol), triethylamine (0.55 mL, 3.85 mmol), diethyl phosphite (0.48 mL, 3.85 mmol) and carbon tetrachloride (10 mL). The mixture was stirred at room temperature overnight. Purification flash chromatography on silica gel (EtOAc/hexane, 2 : 3 v/v) afforded product **S3** (993 mg, 90%) as a colorless oil.

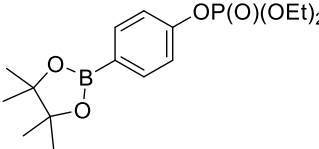
<sup>1</sup>H NMR (500 MHz, CDCl<sub>3</sub>): 7.77 (2 H, d, *J* = 7.9 Hz), 7.20 (2 H, d, *J* = 7.7 Hz), 4.64–3.88 (4 H, m), 1.41–1.02 (18 H, m) ppm. – <sup>13</sup>C NMR (125 MHz, CDCl<sub>3</sub>): 153.3 (d, *J* = 6.6 Hz), 136.6, 119.4 (d, *J* = 4.9 Hz), 84.0, 64.8, 64.7, 25.0, 16.2 (d, *J* = 6.6 Hz) ppm. – <sup>31</sup>P NMR (202 Hz, CDCl<sub>3</sub>): -6.7



ppm. –  $^{11}\text{B}$  NMR (160.4 Hz,  $\text{CDCl}_3$ ): 31.1 ppm. – IR: 2980, 1603, 1397, 1360, 1321, 1270, 1216, 1166, 1144, 1090, 1030, 963, 935  $\text{cm}^{-1}$ . – HRMS: calcd for  $\text{C}_{16}\text{H}_{27}\text{BO}_6\text{P}$ : 357.1633, found 357.1636  $[\text{M}+\text{H}^+]$ .

### Methyl 2-(3-((diethoxyphosphoryl)oxy)phenyl)acetate (**S4**)

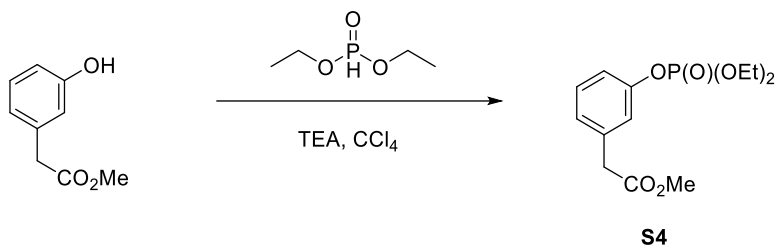

The general procedure GP7 was followed with methyl 2-(3-hydroxyphenyl)acetate (515 mg, 3.1 mmol), triethylamine (0.55 mL, 3.85 mmol), diethyl phosphite (0.48 mL, 3.85 mmol) and carbon tetrachloride (8 mL). The mixture was stirred at room temperature overnight. Purification flash chromatography on silica gel (EtOAc/hexane, 2 : 1 v/v) afforded product **S4** (768 mg, 81%) as a colorless oil.

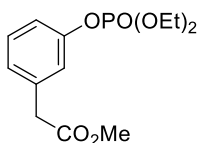

$^1\text{H}$  NMR (500 MHz,  $\text{CDCl}_3$ ): 7.27 (1 H, t,  $J = 7.8$  Hz), 7.13 (1 H, s), 7.12 (1 H, d,  $J = 9.6$  Hz), 7.07 (1 H, d,  $J = 7.6$  Hz), 4.20 (4 H, td,  $J = 7.6, 3.2$  Hz), 3.67 (3 H, s), 3.60 (2 H, s), 1.33 (6 H, t,  $J = 7.1$  Hz) ppm. –  $^{13}\text{C}$  NMR (125 MHz,  $\text{CDCl}_3$ ): 171.6, 150.9 (d,  $J = 6.6$  Hz), 135.9, 129.8, 126.0, 121.0 (d,  $J = 5.2$  Hz), 118.8 (d,  $J = 4.9$  Hz), 64.7 (d,  $J = 6.2$  Hz), 52.2, 40.9, 16.2 (d,  $J = 6.6$  Hz) ppm. –  $^{31}\text{P}$  NMR (202 Hz,  $\text{CDCl}_3$ ): -6.4 ppm. – IR: 3441, 1737, 1609, 1588, 1488, 1446, 1394, 1370, 1344, 1254, 1150, 1027, 981  $\text{cm}^{-1}$ . – HRMS: calcd for  $\text{C}_{13}\text{H}_{20}\text{O}_6\text{P}$ : 303.0992, found 303.0993  $[\text{M}+\text{H}^+]$ .

### Methyl 3-(2-((diethoxyphosphoryl)oxy)phenyl)propanoate (S5)

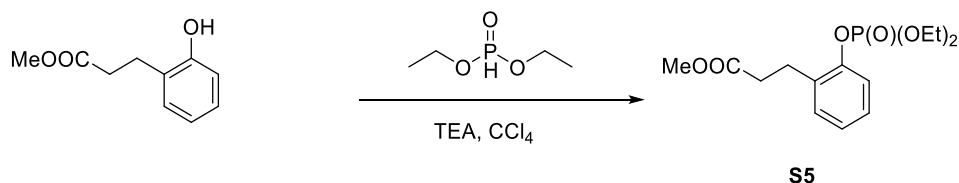

The general procedure GP7 was followed with methyl 3-(2-hydroxyphenyl)propanoate (558 mg, 3.1 mmol), triethylamine (0.55 mL, 3.85 mmol), diethyl phosphite (0.48 mL, 3.85 mmol) and carbon tetrachloride (8 mL). The mixture was stirred at room temperature overnight. Purification flash chromatography on silica gel (EtOAc/hexane, 2 : 1 v/v) afforded product **S5** (793 mg, 81%) as a colorless oil.

<sup>1</sup>H NMR (500 MHz, CDCl<sub>3</sub>): 7.32 (1 H, d, *J* = 6.4 Hz), 7.22–7.14 (2 H, m), 7.08 (1 H, d, *J* = 7.0 Hz), 4.24–4.18 (4 H, m), 3.65 (3 H, s), 3.37–2.87 (2 H, m), 2.79–2.44 (2 H, m), 1.34 (6 H, td, *J* = 7.2, 2.7 Hz) ppm. – <sup>13</sup>C NMR (125 MHz, CDCl<sub>3</sub>): 171.6, 150.9 (d, *J* = 6.6 Hz), 135.9, 129.8, 126.0, 121.0 (d, *J* = 5.2 Hz), 118.8 (d, *J* = 4.9 Hz), 64.8, 64.7, 52.2, 40.9, 16.2, 16.1 ppm. – <sup>31</sup>P NMR (202 Hz, CDCl<sub>3</sub>): –6.2 ppm. – IR: 3440, 2985, 1736, 1492, 1453, 1395, 1266, 1165, 1103, 1028, 967 cm<sup>-1</sup>. – HRMS: calcd for C<sub>14</sub>H<sub>22</sub>O<sub>6</sub>P: 317.1149, found 317.1142 [M+H<sup>+</sup>].

### Diethyl (4-(2-oxo-2-(piperidin-1-yl)ethyl)phenyl) phosphate (S6)

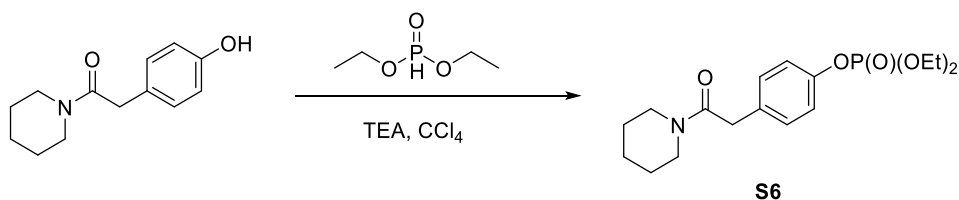

The general procedure GP7 was followed with 2-(4-hydroxyphenyl)-1-(piperidin-1-yl)ethan-1-one (679 mg, 3.1 mmol), triethylamine (0.55 mL, 3.85 mmol), diethyl phosphite (0.48 mL, 3.85 mmol) and carbon tetrachloride (10 mL). The mixture was stirred at room

temperature overnight. Purification flash chromatography on silica gel (EtOAc/DCM, 3 : 2 v/v) afforded product **S6** (561 mg, 51%) as a colorless oil.

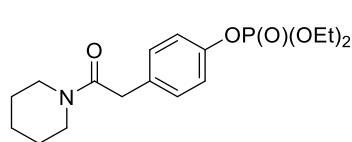

$^1\text{H NMR}$  (500 MHz,  $\text{CDCl}_3$ ): 7.18 (2 H, d,  $J = 8.1$  Hz), 7.13 (2 H, d,  $J = 8.0$  Hz), 4.17 (4 H, tt,  $J = 7.5, 5.5$  Hz), 3.65 (2 H, s), 3.53 (2 H, t,  $J = 5.5$  Hz), 3.33 (2 H, t,  $J = 5.5$  Hz), 1.55 (2 H, q,  $J = 6.0$  Hz), 1.48 (2 H, q,  $J = 5.3$  Hz), 1.39–1.33 (2 H, m), 1.31 (6 H, t,  $J = 7.2$  Hz) ppm. –  $^{13}\text{C NMR}$  (125 MHz,  $\text{CDCl}_3$ ): 169.0, 149.6 (d,  $J = 7.0$  Hz), 132.2, 129.9, 120.1 (d,  $J = 4.9$  Hz), 64.6 (d,  $J = 6.1$  Hz), 47.3, 42.9, 40.3, 26.3, 25.5, 24.4, 16.1 (d,  $J = 6.8$  Hz) ppm. –  $^{31}\text{P NMR}$  (202 Hz,  $\text{CDCl}_3$ ): –6.4 ppm. – IR: 3409, 2939, 1737, 1615, 1507, 1446, 1370, 1258, 1217, 1167, 1028, 970  $\text{cm}^{-1}$ . – HRMS: calcd for  $\text{C}_{17}\text{H}_{21}\text{NO}_5\text{P}$ : 303.0992, found 303.0993 [ $\text{M}+\text{H}^+$ ].

### Diethyl (4-(2-oxo-2-(pyrrolidin-1-yl)ethyl)phenyl) phosphate (**S7**)

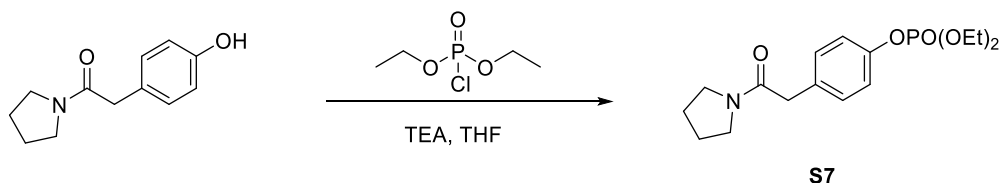

The general procedure GP7 was followed with 2-(4-hydroxyphenyl)-1-(pyrrolidin-1-yl)ethan-1-one (635 mg, 3.1 mmol), triethylamine (0.55 mL, 3.85 mmol), diethyl chlorophosphate (0.48 mL, 3.85 mmol) and THF (15 mL). The mixture was stirred at room temperature overnight. Purification flash chromatography on silica gel (EtOAc/DCM, 3 : 2 v/v) afforded product **S7** (623 mg, 59%) as a colorless oil.

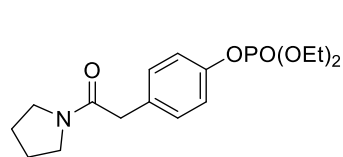

$^1\text{H NMR}$  (500 MHz,  $\text{CDCl}_3$ ): 7.23 (2 H, d,  $J = 8.3$  Hz), 7.14 (2 H, d,  $J = 8.3$  Hz), 4.30–4.03 (4 H, m), 3.59 (2 H, s), 3.46 (2 H, t,  $J = 6.8$  Hz), 3.40 (2 H, t,  $J = 6.8$  Hz), 1.94–1.87 (2 H, m), 1.86–1.78 (2 H, m), 1.33 (6 H, t,  $J = 7.1$  Hz) ppm. –  $^{13}\text{C NMR}$  (125 MHz,  $\text{CDCl}_3$ ): 169.3, 149.6, 131.7, 130.3, 120.1 (d,  $J = 4.8$  Hz), 64.6 (d,  $J = 6.1$  Hz), 47.0, 46.0, 41.5, 26.2, 24.4, 16.2 (d,  $J = 6.7$  Hz) ppm. –  $^{31}\text{P NMR}$  (202 Hz,  $\text{CDCl}_3$ ): –6.3 ppm. – IR: 3400, 2981, 1705, 1621, 1508, 1452, 1394, 1370,

1262, 1217, 1166, 1028, 969  $\text{cm}^{-1}$ . – HRMS: calcd for  $\text{C}_{16}\text{H}_{25}\text{NO}_5\text{P}$ : 342.1465, found 342.1460  $[\text{M}+\text{H}^+]$ .

### Diethyl (4-(2-(indolin-1-yl)-2-oxoethyl)phenyl) phosphate (S8)

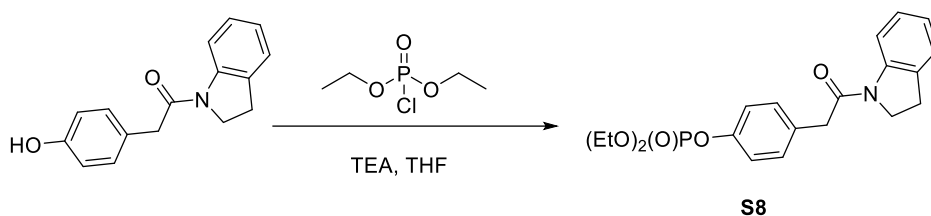

The general procedure GP7 was followed with 2-(4-hydroxyphenyl)-1-(indolin-1-yl)ethan-1-one (784 mg, 3.1 mmol), triethylamine (0.55 mL, 3.85 mmol), diethyl chlorophosphate (0.48 mL, 3.85 mmol) and THF (15 mL). The mixture was stirred at room temperature overnight. Purification flash chromatography on silica gel (EtOAc/hexane, 4 : 1 v/v) afforded product **S8** (603 mg, 50%) as a colorless solid.

M.p.: 57–60 °C. –  $^1\text{H}$  NMR (500 MHz,  $\text{CDCl}_3$ ): 8.24 (1 H, d,  $J = 8.1$  Hz), 7.27 (2 H, d,  $J = 8.3$  Hz), 7.18 (3 H, d,  $J = 8.2$  Hz), 7.16 (1 H, d,  $J = 6.9$  Hz), 7.01 (1 H, t,  $J = 7.4$  Hz), 4.32–4.14 (4 H, m), 4.05 (2 H, t,  $J = 8.4$  Hz), 3.76 (2 H, s), 3.16 (2 H, t,  $J = 8.4$  Hz), 1.34 (6 H, t,  $J = 7.1$  Hz) ppm. –  $^{13}\text{C}$  NMR (125 MHz,  $\text{CDCl}_3$ ): 168.9, 149.9 (d,  $J = 7.0$  Hz), 143.0, 131.2, 131.0, 130.6, 130.5, 127.6, 124.6, 124.0, 120.3 (d,  $J = 4.8$  Hz), 117.2, 64.71, 64.66, 48.3, 42.7, 28.1, 16.2 (d,  $J = 6.6$  Hz) ppm. –  $^{31}\text{P}$  NMR (202 Hz,  $\text{CDCl}_3$ ): –6.3 ppm. – IR: 1660, 1597, 1507, 1479, 443, 1423, 1410, 1395, 1370, 1274, 1210, 1165, 1112, 1017, 967, 940  $\text{cm}^{-1}$ . – HRMS: calcd for  $\text{C}_{20}\text{H}_{25}\text{NO}_5\text{P}$ : 390.1465, found 390.1462  $[\text{M}+\text{H}^+]$ .

### Diethyl (4-(2-morpholino-2-oxoethyl)phenyl) phosphate (S9)

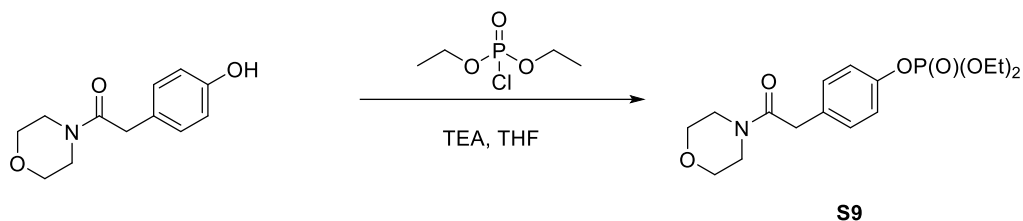

The general procedure GP7 was followed with 2-(4-hydroxyphenyl)-1-morpholinoethan-1-one (685 mg, 3.1 mmol), triethylamine (0.55 mL, 3.85 mmol), diethyl chlorophosphate (0.48 mL, 3.85 mmol) and THF (15 mL). The mixture was stirred at room temperature overnight. Purification flash chromatography on silica gel (EtOAc/DCM, 3 : 2 v/v) afforded product **S9** (641 mg, 59%) as a colorless oil.

$^1\text{H NMR}$  (500 MHz,  $\text{CDCl}_3$ ): 7.18 (2 H, d,  $J = 8.7$  Hz), 7.15 (2 H, d,  $J = 8.8$  Hz), 4.26–4.11 (4 H, m), 3.66 (2 H, s), 3.61 (4 H, s), 3.52–3.44 (2 H, m), 3.40 (2 H, t,  $J = 4.8$  Hz), 1.32 (6 H, t,  $J = 7.1$  Hz) ppm. –  $^{13}\text{C NMR}$  (125 MHz,  $\text{CDCl}_3$ ): 169.4, 149.8 (d,  $J = 6.9$  Hz), 131.5, 130.0, 120.3 (d,  $J = 4.8$  Hz), 66.8, 66.5, 64.7 (d,  $J = 6.2$  Hz), 46.5, 42.2, 39.9, 16.2 (d,  $J = 6.8$  Hz) ppm. –  $^{31}\text{P NMR}$  (202 Hz,  $\text{CDCl}_3$ ): –6.4 ppm. – IR: 3391, 1738, 1626, 1508, 1444, 1394, 1370, 1259, 1217, 1167, 1112, 1031, 969  $\text{cm}^{-1}$ . – HRMS: calcd for  $\text{C}_{16}\text{H}_{25}\text{NO}_6\text{P}$ : 358.1414, found 358.1412  $[\text{M}+\text{H}^+]$ .

### Diethyl (4-(pyrrolidine-1-carbonyl)phenyl) phosphate (S10)

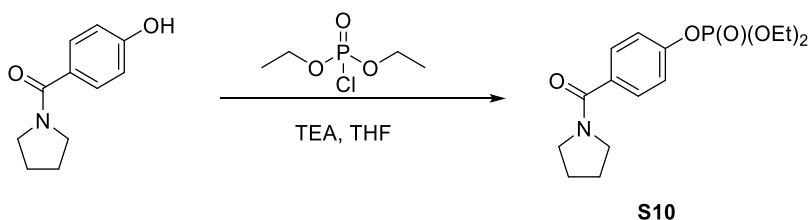

The general procedure GP7 was followed with (4-hydroxyphenyl)(pyrrolidin-1-yl)methanone (592 mg, 3.1 mmol), triethylamine (0.55 mL, 3.85 mmol), diethyl chlorophosphate (0.48 mL, 3.85 mmol) and THF (15 mL). The mixture was stirred at room

temperature overnight. Purification flash chromatography on silica gel (EtOAc/DCM, 3 : 2 v/v) afforded product **S10** (547 mg, 54%) as a colorless oil.

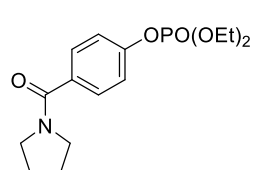

$^1\text{H}$  NMR (500 MHz,  $\text{CDCl}_3$ ): 7.51 (2 H, d,  $J = 8.5$  Hz), 7.23 (2 H, d,  $J = 8.3$  Hz), 4.47–3.96 (4 H, m), 3.61 (2 H, t,  $J = 7.0$  Hz), 3.41 (2 H, t,  $J = 6.6$  Hz), 1.94 (2 H, dt,  $J = 13.4, 6.6$  Hz), 1.86 (2 H, dt,  $J = 13.0, 6.4$  Hz), 1.34 (6 H, t,  $J = 7.0$  Hz) ppm. –  $^{13}\text{C}$  NMR (125 MHz,  $\text{CDCl}_3$ ): 169.1, 152.1 (d,  $J = 6.7$  Hz), 134.2, 129.3, 120.1 (d,  $J = 5.2$  Hz), 65.1 (d,  $J = 6.2$  Hz), 50.0, 46.6, 26.8, 24.8, 16.4 (d,  $J = 6.7$  Hz) ppm. –  $^{31}\text{P}$  NMR (202 Hz,  $\text{CDCl}_3$ ): –6.6 ppm. – IR: 2983, 1709, 1607, 1509, 1442, 1366, 1269, 1224, 1167, 1301, 967  $\text{cm}^{-1}$ . – HRMS: calcd for  $\text{C}_{15}\text{H}_{23}\text{NO}_5\text{P}$ : 328.1308, found 328.1309 [ $\text{M}+\text{H}^+$ ].

***tert*-Butyl 4-(4-((diethoxyphosphoryl)oxy)benzamido)piperidine-1-carboxylate (**S11**)**

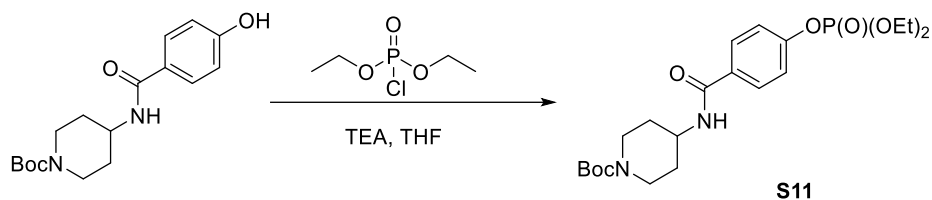

The general procedure GP7 was followed with (*tert*-butyl 4-(4-hydroxybenzamido)piperidine-1-carboxylate (991 mg, 3.1 mmol), triethylamine (0.55 mL, 3.85 mmol), diethyl chlorophosphate (0.48 mL, 3.85 mmol) and THF (20 mL). The mixture was stirred at room temperature overnight. Purification flash chromatography on silica gel (EtOAc/hexane, 1 : 1 v/v) afforded product **S11** (835 mg, 59%) as a colorless oil.

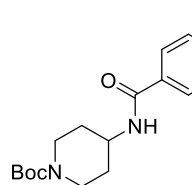

$^1\text{H}$  NMR (500 MHz,  $\text{CDCl}_3$ ): 7.77 (2 H, d,  $J = 8.7$  Hz), 7.17 (2 H, dd,  $J = 8.7, 1.0$  Hz), 6.97 (1 H, d,  $J = 7.9$  Hz), 4.24–4.15 (4 H, m), 4.09–3.97 (3 H, m), 2.81 (2 H, s), 1.89 (2 H, brs), 1.41 (9 H, s), 1.39–1.32 (2 H, m), 1.30 (6 H, td,  $J = 7.1, 1.1$  Hz) ppm. –  $^{13}\text{C}$  NMR (125 MHz,  $\text{CDCl}_3$ ): 166.0, 154.7, 152.92, 152.87, 131.4, 129.1, 119.73, 119.69, 79.6, 64.9 (d,  $J = 6.3$  Hz), 47.3, 42.8, 31.8, 28.4, 16.0 (d,  $J = 6.7$  Hz) ppm. –  $^{31}\text{P}$  NMR (202 Hz,  $\text{CDCl}_3$ ): –7.1 ppm. – IR: 2980, 1640, 1605,

1542, 1500, 1478, 1427, 1366, 1327, 1271, 1235, 1166, 1100, 1028, 963, 936  $\text{cm}^{-1}$ . – HRMS: calcd for  $\text{C}_{31}\text{H}_{34}\text{N}_2\text{O}_7\text{P}$ : 457.2098, found 457.2100  $[\text{M}+\text{H}^+]$ .

***tert*-Butyl 5-((diethoxyphosphoryl)oxy)-3,4-dihydroquinoline-1(2*H*)-carboxylate (S12)**

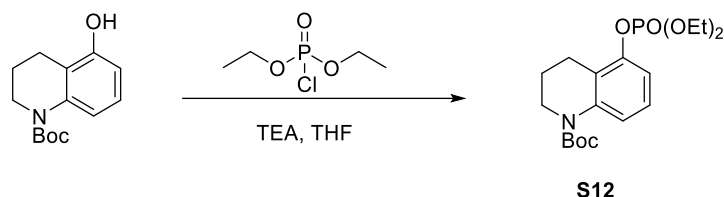

The general procedure GP7 was followed with *tert*-butyl 5-hydroxy-3,4-dihydroquinoline-1(2*H*)-carboxylate (772 mg, 3.1 mmol), triethylamine (0.55 mL, 3.85 mmol), diethyl chlorophosphate (0.48 mL, 3.85 mmol) and THF (10 mL). The mixture was stirred at room temperature overnight. Purification flash chromatography on silica gel (EtOAc/hexane, 1 : 15 v/v) afforded product **S12** (721 mg, 61%) as a colorless oil.

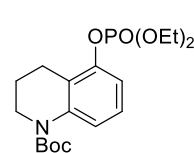

$^1\text{H}$  NMR (500 MHz,  $\text{CDCl}_3$ ): 7.59 (1 H, d,  $J = 9.3$  Hz), 7.13–6.70 (2 H, m), 4.26–4.12 (4 H, m), 3.70–3.63 (2 H, m), 2.73 (2 H, t,  $J = 6.6$  Hz), 1.89 (2 H, p,  $J = 6.5$  Hz), 1.49 (9 H, s), 1.33 (6 H, td,  $J = 7.1, 1.1$  Hz) ppm. –  $^{13}\text{C}$  NMR (125 MHz,  $\text{CDCl}_3$ ): 154.0, 146.25, 146.19, 135.7, 131.5, 125.4, 119.6, 119.5, 117.39, 117.35, 81.0, 64.6 (d,  $J = 6.0$  Hz), 44.6, 28.5, 27.6, 23.4, 16.2 (d,  $J = 6.8$  Hz) ppm. –  $^{31}\text{P}$  NMR (202 Hz,  $\text{CDCl}_3$ ): –6.2 ppm. – IR: 2979, 1694, 1495, 1455, 1367, 1337, 1252, 1158, 1139, 1029, 975, 915  $\text{cm}^{-1}$ . – HRMS: calcd for  $\text{C}_{18}\text{H}_{32}\text{N}_2\text{O}_6\text{P}$ : 403.1992, found 403.1990  $[\text{M}+\text{NH}_4^+]$ .

***tert*-Butyl 4-((diethoxyphosphoryl)oxy)indoline-1-carboxylate (S13)**

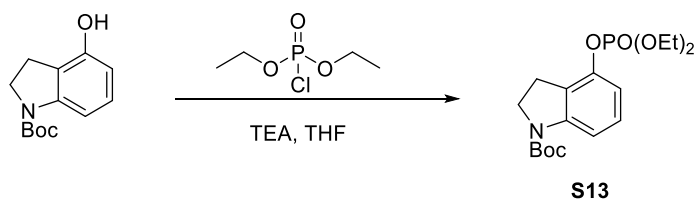

The general procedure GP7 was followed with *tert*-butyl 4-hydroxyindoline-1-carboxylate (728 mg, 3.1 mmol), triethylamine (0.55 mL, 3.85 mmol), diethyl chlorophosphate (0.48 mL, 3.85 mmol) and THF (10 mL). The mixture was stirred at room temperature overnight. Purification flash chromatography on silica gel (EtOAc/hexane, 1 : 15 v/v) afforded product **S13** (782 mg, 68%) as a colorless oil.

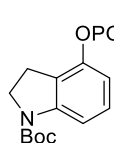

<sup>1</sup>H NMR (500 MHz, CDCl<sub>3</sub>): 7.72 (1 H, s), 7.12 (1 H, t, *J* = 8.1 Hz), 6.85 (1 H, d, *J* = 8.2 Hz), 4.27–4.13 (4 H, m), 3.99 (2 H, t, *J* = 8.9 Hz), 3.14 (2 H, t, *J* = 8.7 Hz), 1.55 (9 H, s), 1.35 (6 H, td, *J* = 7.0, 1.0 Hz) ppm. – <sup>13</sup>C NMR (125 MHz, CDCl<sub>3</sub>): 152.5, 147.1, 129.0, 113.7, 111.7, 64.8 (d, *J* = 6.2 Hz), 48.0, 29.8, 28.6, 24.7, 16.3 (d, *J* = 6.7 Hz) ppm. – <sup>31</sup>P NMR (202 Hz, CDCl<sub>3</sub>): –6.0 ppm. – IR: 2979, 1699, 1614, 1466, 1388, 1337, 1266, 1238, 1164, 1142, 1031, 974 cm<sup>-1</sup>. – HRMS: calcd for C<sub>17</sub>H<sub>30</sub>N<sub>2</sub>O<sub>6</sub>P: 389.1836, found 389.1836 [M+NH<sub>4</sub><sup>+</sup>].

**Diethyl ((8*R*,9*S*,13*S*,14*S*)-13-methyl-6,7,8,9,11,12,13,14,15,16-decahydrospiro[cyclopenta[*a*]phenanthrene-17,2'-[1,3]dioxolan]-3-yl) phosphate (**S14**)**

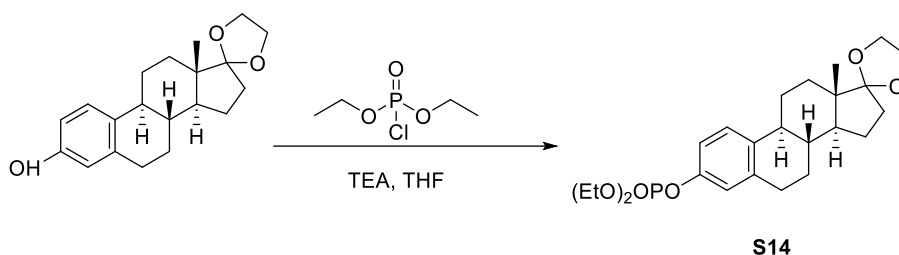

The general procedure GP7 was followed with (8*R*,9*S*,13*S*,14*S*)-13-methyl-6,7,8,9,11,12,13,14,15,16-decahydrospiro[cyclopenta[*a*]phenanthrene-17,2'-[1,3]dioxolan]-3-ol (973 mg, 3.1 mmol), triethylamine (0.55 mL, 3.85 mmol), diethyl chlorophosphate (0.48 mL, 3.85 mmol) and THF (15 mL). The mixture was stirred at room temperature overnight. Purification flash chromatography on silica gel (EtOAc/hexane, 2 : 3 v/v) afforded product **S14** (990 mg, 71%) as a colorless oil.



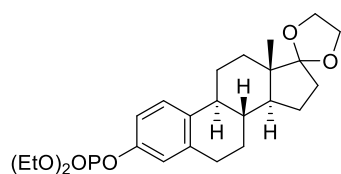

$[\alpha]_D = +73$  (*c* 0.23M,  $\text{CHCl}_3$ ). –  $^1\text{H NMR}$  (500 MHz,  $\text{CDCl}_3$ ): 7.22 (1 H, d,  $J = 8.5$  Hz), 6.96 (1 H, d,  $J = 8.5$  Hz), 6.92 (1 H, s), 4.37–4.14 (4 H, m), 4.01–3.77 (4 H, m), 2.84 (2 H, dd,  $J = 8.4, 4.1$  Hz), 2.36–2.27 (1 H, m), 2.23 (1 H, td,  $J = 10.2, 4.1$  Hz, 1H), 2.07–1.99 (1 H, m), 1.93–1.71 (4 H, m), 1.67–1.59 (1 H, m), 1.57–1.34 (5 H, m), 1.35 (6 H, t,  $J = 7.1$  Hz), 0.88 (3 H, s) ppm. –  $^{13}\text{C NMR}$  (125 MHz,  $\text{CDCl}_3$ ): 148.65, 148.59, 138.7, 137.3, 126.7, 119.99, 119.95, 119.5, 117.1, 117.0, 65.4, 64.6 (d,  $J = 6.0$  Hz), 64.5, 49.5, 46.2, 43.8, 38.9, 34.4, 30.8, 29.7, 26.9, 26.1, 22.5, 16.2 (d,  $J = 6.7$  Hz), 14.4 ppm. –  $^{31}\text{P NMR}$  (202 Hz,  $\text{CDCl}_3$ ): –6.1 ppm. – IR: 2936, 1607, 1580, 1494, 1456, 1379, 1273, 1232, 1156, 1104, 1029, 973  $\text{cm}^{-1}$ . – HRMS: calcd for  $\text{C}_{24}\text{H}_{36}\text{O}_6\text{P}$ : 451.2244, found 451.2240  $[\text{M}+\text{H}^+]$ .

**(8*R*,9*S*,13*S*,14*S*,17*S*)-17-((*tert*-Butyldimethylsilyl)oxy)-13-methyl-7,8,9,11,12,13,14,15,16,17-decahydro-6*H*-cyclopenta[*a*]phenanthren-3-yl diethyl phosphate (S15)**

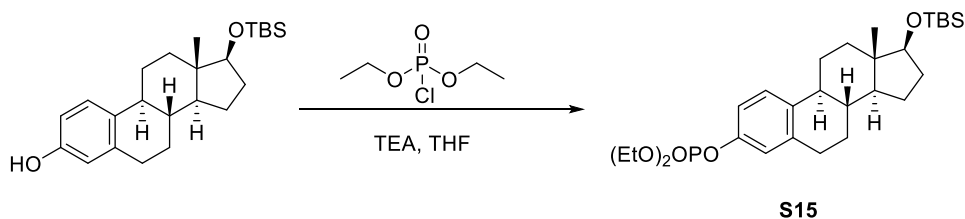

The general procedure GP7 was followed with (8*R*,9*S*,13*S*,14*S*,17*S*)-17-((*tert*-butyldimethylsilyl)oxy)-13-methyl-7,8,9,11,12,13,14,15,16,17-decahydro-6*H*-cyclopenta[*a*]phenanthren-3-ol (1.20 g, 3.1 mmol), triethylamine (0.55 mL, 3.85 mmol), diethyl chlorophosphate (0.48 mL, 3.85 mmol) and THF (20 mL). The mixture was stirred at room temperature overnight. Purification flash chromatography on silica gel (EtOAc/hexane, 1 : 4 v/v) afforded product **S15** (1.05 g, 65%) as a colorless oil.

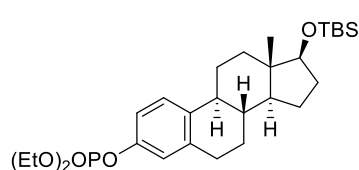

$[\alpha]_D = +46$  ( $c$  0.41M,  $\text{CHCl}_3$ ). –  $^1\text{H NMR}$  (500 MHz,  $\text{CDCl}_3$ ): 7.21 (1 H, d,  $J = 8.6$  Hz), 6.95 (1 H, dd,  $J = 8.6, 2.7$  Hz), 6.91 (1 H, s), 4.31–4.07 (4 H, m), 3.63 (1 H, t,  $J = 8.3$  Hz), 2.83 (2 H, dd,  $J = 10.9, 4.9$  Hz), 2.25 (1 H, dd,  $J = 17.2, 3.7$  Hz), 2.20–2.11 (1 H, m), 1.97–1.81 (3 H, m), 1.69–1.59 (1 H, m), 1.54–1.43 (2 H, m), 1.42–1.25 (8 H, m), 1.23–1.17 (1 H, m), 1.16–1.08 (1 H, m), 0.88 (9 H, s), 0.73 (3 H, s), 0.03 (3 H, s), 0.01 (3 H, s) ppm. –  $^{13}\text{C NMR}$  (125 MHz,  $\text{CDCl}_3$ ): 148.53, 148.48, 138.6, 137.3, 126.6, 119.88, 119.85, 117.00, 116.96, 81.8, 77.4, 64.4 (d,  $J = 6.0$  Hz), 49.7, 44.2, 43.6, 38.6, 37.2, 31.0, 29.7, 27.1, 26.3, 25.9, 23.3, 18.1, 16.2 (d,  $J = 6.6$  Hz), 11.4, –4.4, –4.8 ppm. –  $^{31}\text{P NMR}$  (202 Hz,  $\text{CDCl}_3$ ): –6.1 ppm. – IR: 2928, 1608, 1495, 1472, 1389, 1297, 1248, 1140, 1096, 1061, 1031, 1006, 974, 889  $\text{cm}^{-1}$ . – HRMS: calcd for  $\text{C}_{28}\text{H}_{48}\text{O}_5\text{PSi}$ : 523.3003, found 523.3004  $[\text{M}+\text{H}^+]$ .

### Ethyl (S)-2-acetamido-3-(4-((diethoxyphosphoryl)oxy)phenyl)propanoate (S16)

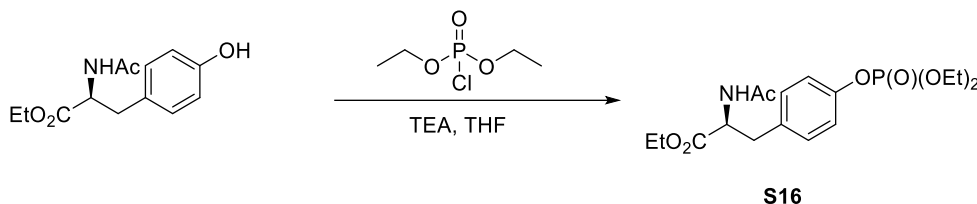

The general procedure GP7 was followed with ethyl acetyl-*L*-tyrosinate (778 mg, 0.2 mmol), triethylamine (0.55 mL, 3.85 mmol), diethyl chlorophosphate (0.48 mL, 3.85 mmol) and THF (12 mL). The mixture was stirred at room temperature overnight. Purification flash chromatography on silica gel (EtOAc/DCM, 3 : 2 v/v) afforded product **S17** (732 mg, 61%) as a colorless oil.

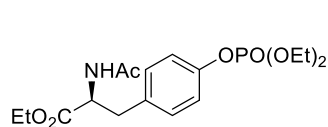

$[\alpha]_D = +60$  ( $c$  0.12M,  $\text{CHCl}_3$ ). –  $^1\text{H NMR}$  (500 MHz,  $\text{CDCl}_3$ ): 7.10 (2 H, d,  $J = 8.2$  Hz), 7.05 (2 H, d,  $J = 8.6$  Hz), 6.14 (1 H, d,  $J = 7.6$  Hz), 4.78 (1 H, dt,  $J = 7.9, 5.9$  Hz), 4.29–3.87 (6 H, m), 3.05 (2 H, qd,  $J = 14.0, 6.0$  Hz), 1.94 (3 H, s), 1.31 (6 H, t,  $J = 7.1$  Hz), 1.20 (3 H, t,  $J = 7.2$  Hz) ppm. –  $^{13}\text{C}$

NMR (125 MHz, CDCl<sub>3</sub>): 171.8, 170.0, 150.1 (d, *J* = 7.0 Hz), 133.1, 130.8, 120.3 (d, *J* = 4.9 Hz), 64.9 (d, *J* = 5.9 Hz), 61.8, 53.5, 37.4, 23.4, 16.4 (d, *J* = 6.9 Hz), 14.4 ppm. – <sup>31</sup>P NMR (202 Hz, CDCl<sub>3</sub>): –6.4 ppm. – IR: 3373, 2988, 1729, 1651, 1557, 1508, 1445, 1374, 1255, 1217, 1167, 1029, 970 cm<sup>-1</sup>. – HRMS: calcd for C<sub>17</sub>H<sub>27</sub>NO<sub>7</sub>P: 388.1520, found 388.1522 [M+H<sup>+</sup>].

### Diethyl (4-((2-morpholinoethyl)carbamoyl)phenyl) phosphate (S17)

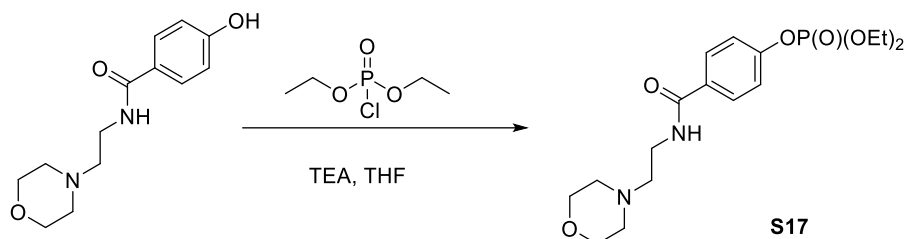

The general procedure GP7 was followed with 4-hydroxy-N-(2-morpholinoethyl)benzamide (775 mg, 3.1 mmol), triethylamine (0.55 mL, 3.85 mmol), diethyl chlorophosphate (0.48 mL, 3.85 mmol) and THF (15 mL). The mixture was stirred at room temperature overnight. Purification flash chromatography on silica gel (MeOH/DCM, 1 : 19 v/v) afforded product **S17** (177 mg, 60%) as a colorless oil.

<sup>1</sup>H NMR (500 MHz, CDCl<sub>3</sub>): 7.76 (2 H, d, *J* = 8.6 Hz), 7.27 (2 H, d, *J* = 8.9 Hz), 6.77 (1 H, s), 4.21 (4 H, ddt, *J* = 11.3, 6.8, 3.6 Hz), 3.71 (4 H, t, *J* = 4.6 Hz), 3.53 (2 H, q, *J* = 5.6 Hz), 2.59 (2 H, t, *J* = 6.0 Hz), 2.49 (4 H, s), 1.35 (6 H, t, *J* = 7.1 Hz) ppm. – <sup>13</sup>C NMR (125 MHz, CDCl<sub>3</sub>): 166.3, 153.0 (d, *J* = 6.5 Hz), 131.2, 128.6, 119.9 (d, *J* = 5.2 Hz), 66.8, 64.7 (d, *J* = 5.9 Hz), 56.7, 54.0, 35.9, 16.0 (d, *J* = 6.6 Hz) ppm. – <sup>31</sup>P NMR (202 Hz, CDCl<sub>3</sub>): –6.7 ppm. – IR: 3389, 2985, 1636, 1604, 1552, 1500, 1446, 1262, 1220, 1166, 1113, 1024, 964, 936 cm<sup>-1</sup>. – HRMS: calcd for C<sub>17</sub>H<sub>28</sub>N<sub>2</sub>O<sub>6</sub>P: 387.1679, found 387.1673 [M+H<sup>+</sup>].

### 1-Methyl-1-phenylpyrrolidin-1-ium trifluoromethanesulfonate (S18)

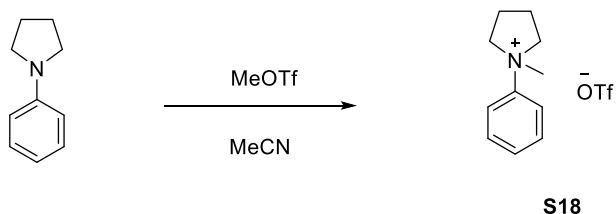

To a solution 1-phenylpyrrolidine (294 mg, 2 mmol) in CH<sub>3</sub>CN (5 mL) was added MeOTf (394 mg, 2.4 mmol). The mixture was stirred for 2 h at room temperature, and then concentrated and washed with diethyl ether to afford the desired product **S18** (498 mg, 80%) as a brown liquid.

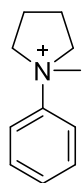

<sup>-</sup>OTf

<sup>1</sup>H NMR (500 MHz, CD<sub>3</sub>CN): 7.71 (2 H, d, *J* = 7.7 Hz), 7.66–7.54 (3 H, m), 4.15 (2 H, ddd, *J* = 7.0, 4.8, 2.7 Hz), 3.90 (2 H, dt, *J* = 12.2, 6.5 Hz), 3.34 (3 H, s), 2.29 (4 H, ddd, *J* = 13.3, 7.0, 4.2 Hz) ppm. – <sup>13</sup>C NMR (125 MHz, CD<sub>3</sub>CN): 131.3, 122.8 (q, *J* = 111.8 Hz), 121.8, 120.7, 66.9, 55.6, 21.4 ppm. – <sup>19</sup>F NMR (470.5 Hz, CDCl<sub>3</sub>): -79.3 ppm. – IR: 3509, 1640, 1596, 1497, 1475, 1456, 1247, 1224, 1156, 1027, 1009, 933, 876 cm<sup>-1</sup>. – HRMS: calcd for C<sub>13</sub>H<sub>16</sub>F<sub>6</sub>NO<sub>6</sub>S<sub>2</sub>: 460.0329, found 460.0311 [M+CF<sub>3</sub>O<sub>3</sub>S<sup>-</sup>].

### 3-Ethyl-*N,N,N*-trimethylbenzenaminium (S19)

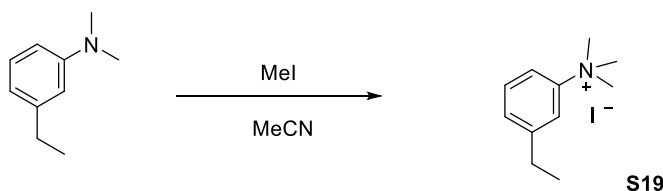

According to a literature procedure,<sup>[10]</sup> to a solution of 3-ethyl-*N,N*-dimethylaniline (447 mg, 3 mmol) in CH<sub>3</sub>CN (5 mL) was added CH<sub>3</sub>I (1.28 g, 9 mmol). The solution was stirred for 8 h at 90 °C in a screw-capped vial. At the conclusion of the reaction, diethyl ether was added (40 mL), the precipitate was isolated by filtration, washed with ethyl ether, and the residual solvent was removed in vacuo to afford the desired product **S19** (856 mg, 98%) as a colorless solid.

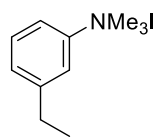

M.p.: > 200 °C. – <sup>1</sup>H NMR (500 MHz, CD<sub>3</sub>CN): 7.76 (1 H, s), 7.66 (1 H, dd, *J* = 8.4, 2.7 Hz), 7.51 (1 H, t, *J* = 8.0 Hz), 7.42 (1 H, d, *J* = 7.6 Hz), 3.63 (9 H, s), 2.75 (2 H, q, *J* = 7.6 Hz), 1.25 (3 H, t, *J* = 7.6 Hz) ppm. – <sup>13</sup>C NMR (125 MHz, CD<sub>3</sub>CN): 148.3, 131.0, 130.8, 120.7, 118.1, 58.0, 29.3, 15.8 ppm. – IR: 3004, 1748, 1716, 1614, 1588, 1492, 1473, 1456, 1375, 1338, 1247, 1208, 1181, 1096, 955, 883 cm<sup>-1</sup>. – HRMS: calcd for C<sub>11</sub>H<sub>18</sub>I<sub>2</sub>N: 417.9534, found 417.9520 [M+I].

### *N,N,N*-Trimethyl-3-(methylsulfonyl)benzenaminium trifluoromethanesulfonate

(S20)

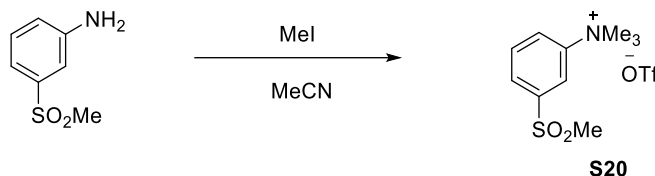

To a solution of 3-(methylsulfonyl)aniline (353 mg, 2 mmol) in CH<sub>3</sub>CN (5 mL) was added MeOTf (1.05 g, 6.4 mmol) and Na<sub>2</sub>CO<sub>3</sub> (636 mg, 6 mmol). The mixture was stirred for 2 h at room temperature, and then filter through celite® pad, concentrated and washed with diethyl ether to afford the desired product **S20** (566 mg, 78%) as a brown oil.

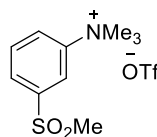

<sup>1</sup>H NMR (500 MHz, CD<sub>3</sub>CN): 8.27 (1 H, dd, *J* = 2.4, 1.4 Hz), 8.16 (1 H, dd, *J* = 8.5, 2.7 Hz), 8.13 (1 H, d, *J* = 8.2 Hz), 7.89 (1 H, t, *J* = 8.2 Hz), 3.63 (9 H, s), 3.16 (3 H, s) ppm. – <sup>13</sup>C NMR (125 MHz, CD<sub>3</sub>CN): 148.0, 143.8, 132.8, 130.3, 126.6, 120.5 (t, *J* = 320.3 Hz), 120.4, 58.0, 44.2 ppm. – <sup>19</sup>F NMR (470.5 Hz, CD<sub>3</sub>CN): -79.3 ppm. – IR: 3405, 1635, 1489, 1435, 1310, 1250, 1226, 1157, 1099, 1029, 958 cm<sup>-1</sup>. – HRMS: calcd for C<sub>12</sub>H<sub>16</sub>F<sub>6</sub>NO<sub>8</sub>S<sub>3</sub>: 511.9948, found 511.9953 [M+CF<sub>3</sub>O<sub>3</sub>S].

### *N,N,N*-Trimethyl-1*H*-indol-4-aminium trifluoromethanesulfonate (**S21**)

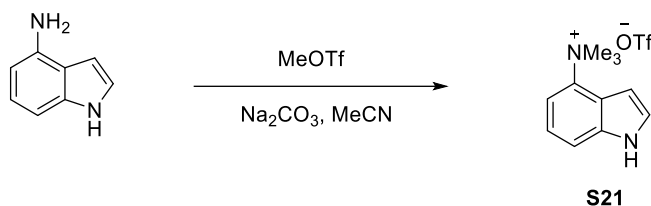

To a solution of 1*H*-indol-4-amine (264 mg, 2 mmol) in CH<sub>3</sub>CN (5 mL) was added MeOTf (1.05 g, 6.4 mmol) and Na<sub>2</sub>CO<sub>3</sub> (636 mg, 6 mmol). The mixture was stirred for 2 h at room temperature, and then filter through celite® pad, concentrated and washed with diethyl ether to afford the desired product **S21** (389 mg, 60%) as a colorless solid.

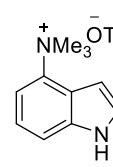 M.p.: > 200 °C. <sup>1</sup>H NMR (500 MHz, CD<sub>3</sub>CN): 10.47 (1 H, s), 7.71 (1 H, d, *J* = 8.2 Hz), 7.53 (1 H, t, *J* = 3.0 Hz), 7.37 (1 H, d, *J* = 8.0 Hz), 7.23 (1 H, t, *J* = 8.1 Hz), 6.79 (1 H, s), 3.69 (9 H, s) ppm. – <sup>13</sup>C NMR (125 MHz, CD<sub>3</sub>CN): 139.2, 138.7, 128.1, 121.6, 121.3 (q, *J* = 319.4 Hz), 118.4, 115.6, 111.2, 100.4, 56.4 ppm. – <sup>19</sup>F NMR (470.5 Hz, CD<sub>3</sub>CN): –79.2 ppm. – IR: 3493, 1627, 1493, 1342, 1247, 1227, 1168, 1029, 981, 944, 896 cm<sup>-1</sup>. – HRMS: calcd for C<sub>13</sub>H<sub>15</sub>F<sub>6</sub>N<sub>2</sub>O<sub>6</sub>S<sub>2</sub>: 473.0281, found 473.0292 [M+CF<sub>3</sub>O<sub>3</sub>S<sup>-</sup>].

### 4-(Indoline-1-carbonyl)-*N,N,N*-trimethylbenzenaminium trifluoromethanesulfonate (**S22**)

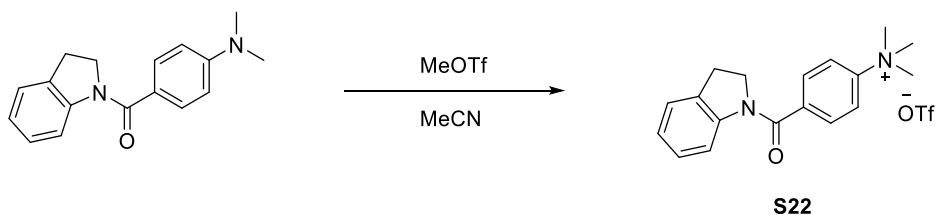

To a solution of 4-(dimethylamino)phenyl(indolin-1-yl)methanone (532 mg, 2 mmol) in CH<sub>3</sub>CN (5 mL) was added MeOTf (394 mg, 2.4 mmol). The mixture was stirred for 2 h at room temperature, and then concentrated and washed with diethyl ether to afford the desired product **S22** (817 mg, 95%) as a colorless solid.

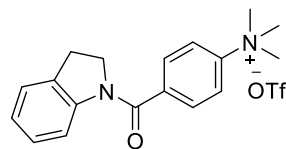
 M.p.: > 200 °C. – <sup>1</sup>H NMR (500 MHz, CD<sub>3</sub>CN): 8.16 (1 H, brs), 7.91 (2 H, d, *J* = 9.0 Hz), 7.78 (2 H, d, *J* = 7.9 Hz), 7.29 (2 H, d, *J* = 7.4 Hz), 7.24 (1 H, s), 7.09 (1 H, s), 3.96 (2 H, brs), 3.61 (9 H, s), 3.14 (2 H, t, *J* = 8.3 Hz) ppm. – <sup>13</sup>C NMR (125 MHz, CD<sub>3</sub>CN): 167.8, 148.4, 140.5, 129.7, 127.9, 126.0, 125.2, 121.6, 51.5, 28.8 ppm. – <sup>19</sup>F NMR (470.5 Hz, CD<sub>3</sub>CN): -78.7 ppm. – IR: 1723, 1641, 1596, 1499, 1482, 1463, 1399, 1352, 1257, 1226, 1150, 1119, 1071, 1029, 943 cm<sup>-1</sup>. – HRMS: calcd for C<sub>20</sub>H<sub>21</sub>F<sub>6</sub>N<sub>2</sub>O<sub>7</sub>S<sub>2</sub>: 579.0700, found 579.0683 [M+CF<sub>3</sub>O<sub>3</sub>S<sup>-</sup>].

### *N,N,N*-Trimethyl-3-((thiophen-2-ylmethyl)carbamoyl)benzenaminium iodide (S23)

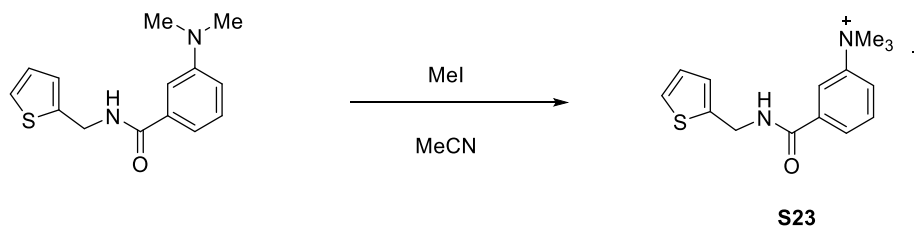

To a solution of 3-(dimethylamino)-*N*-(thiophen-2-ylmethyl)benzamide (520 mg, 2 mmol) in CH<sub>3</sub>CN (5 mL) was added MeI (1.2 g, 8 mmol). The mixture was stirred overnight at 80 °C, and then concentrated and washed with diethyl ether to afford the desired product **S23** (788 mg, 98%) as a colorless solid.

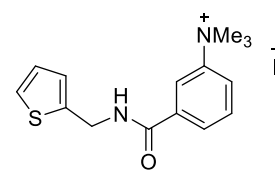
 M.p.: 161–164 °C. – <sup>1</sup>H NMR (500 MHz, CD<sub>3</sub>CN): 8.47 (2 H, s), 8.07 (1 H, d, *J* = 7.8 Hz), 7.95 (1 H, dd, *J* = 8.4, 2.5 Hz), 7.70 (1 H, t, *J* = 8.1 Hz), 7.27 (1 H, d, *J* = 6.1 Hz), 7.09 (1 H, d, *J* = 2.6 Hz), 6.98–6.90 (1 H, m), 4.73 (2 H, d, *J* = 6.0 Hz), 3.65 (9 H, s) ppm. – <sup>13</sup>C NMR (125 MHz, CD<sub>3</sub>CN): 165.5, 143.0, 137.4, 131.6, 130.4, 127.7, 127.0, 126.0, 123.8, 120.5, 58.2, 38.7 ppm. – IR: 3253, 1709, 1647, 1581, 1529, 1487, 1418, 1355, 1303, 1270, 1218, 1143, 1089, 1041, 950, 935 cm<sup>-1</sup>. – HRMS: calcd for C<sub>15</sub>H<sub>18</sub>N<sub>2</sub>O<sub>3</sub>I: 401.0190, found 401.0178 [M+H<sup>+</sup>].

**4-(3-Ethyl-2,6-dioxopiperidin-3-yl)-*N,N,N*-trimethylbenzenaminium  
trifluoromethanesulfonate (S24)**

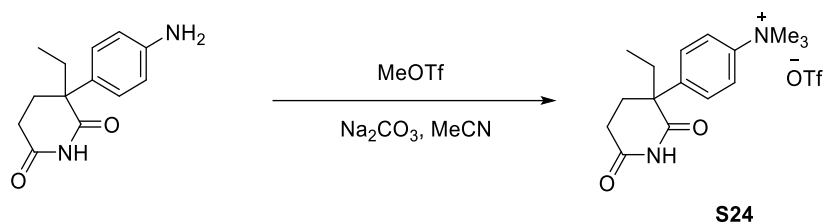

To a solution of 3-(4-aminophenyl)-3-ethylpiperidine-2,6-dione (464 mg, 2 mmol) in CH<sub>3</sub>CN (5 mL) was added MeOTf (1.05 g, 6.4 mmol) and Na<sub>2</sub>CO<sub>3</sub> (636 mg, 6 mmol). The mixture was stirred for 2 h at room temperature, and then filter through celite® pad, concentrated and washed with diethyl ether to afford the desired product **S24** (678 mg, 80%) as a colorless solid.

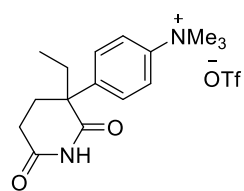

M.p.: 96–99 °C. – <sup>1</sup>H NMR (500 MHz, CDCl<sub>3</sub>): 8.85 (1 H, s), 7.77 (2 H, d, *J* = 9.2 Hz), 7.55 (2 H, d, *J* = 9.1 Hz), 3.53 (9 H, s), 2.65–2.47 (1 H, m), 2.46–2.38 (2 H, m), 2.33–2.14 (2 H, m), 2.00 (1 H, dt, *J* = 14.9, 7.4 Hz), 0.83 (3 H, t, *J* = 7.4 Hz) ppm. – <sup>13</sup>C NMR (125 MHz, CDCl<sub>3</sub>): 175.8, 173.1, 143.7, 129.5, 121.8, 121.3, 57.9, 51.6, 32.7, 29.7, 27.6, 9.1 ppm. – <sup>19</sup>F NMR (470.5 Hz, CD<sub>3</sub>CN): –79.4 ppm. – IR: 2974, 1717, 1684, 1647, 1602, 1510, 1496, 1457, 1354, 1259, 1231, 1195, 1170, 1030 cm<sup>-1</sup>. – HRMS: calcd for C<sub>17</sub>H<sub>22</sub>F<sub>3</sub>N<sub>2</sub>O<sub>5</sub>S: 423.1207, found 423.1192 [M–H<sup>+</sup>].

**(2*R*,3*R*,4*S*,5*R*,6*R*)-4-(4-Iodo-2-(methoxymethyl)phenoxy)-2,3,5-trimethoxy-6-(methoxymethyl)tetrahydro-2*H*-pyran (S25)**

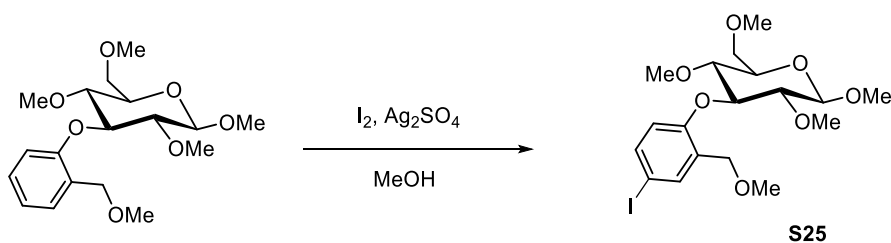

According to a literature procedure,<sup>[11]</sup> a suspension of (2*R*,3*R*,4*S*,5*R*,6*R*)-2,3,5-trimethoxy-6-(methoxymethyl)-4-(2-(methoxymethyl)phenoxy)tetrahydro-2*H*-pyran



(356 mg, 1.0 mmol), iodine (330 mg, 1.05 mmol) and silver sulfate (328 mg, 1.05 mmol) in methanol was stirred at rt for 1 h and then the solid filtrated off. The filtrate was treated with saturated aqueous sodium sulfite solution until the violet color disappeared and then concentrated under reduced pressure. The resulting residue was extracted with dichloromethane (20 mL) and the organic phase washed with water (2 × 10 mL) and brine (10 mL), and dried over sodium sulfate. Upon removal of the solvent under reduced pressure, compound **S25** was obtained as a colorless solid (429 mg, 89%).

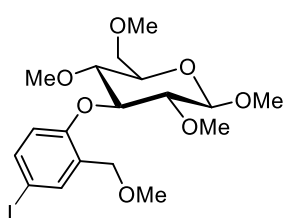

$[\alpha]_D = -39$  (*c* 0.14M, CHCl<sub>3</sub>). – m.p.: 80–83 °C. – <sup>1</sup>H NMR (500 MHz, CDCl<sub>3</sub>): 7.69 (1 H, s), 7.51 (1 H, d, *J* = 8.6 Hz), 6.78 (1 H, d, *J* = 8.6 Hz), 4.75 (1 H, d, *J* = 7.1 Hz), 4.61–4.25 (2 H, m), 3.65 (7 H, d, *J* = 8.9 Hz), 3.55 (4 H, d, *J* = 8.0 Hz), 3.39–3.33 (7 H, m), 3.30–3.19 (3 H, m) ppm. – <sup>13</sup>C NMR (125 MHz, CDCl<sub>3</sub>): 154.6, 137.4, 137.0, 130.7, 117.3, 101.3, 86.7, 85.8, 83.6, 79.2, 75.0, 71.2, 68.7, 61.1, 60.9, 60.6, 59.5, 58.7 ppm. – IR: 2979, 2939, 1742, 1720, 1609, 1419, 1345, 1288, 1225, 1135, 1093, 1065, 991 cm<sup>-1</sup>. – HRMS: calcd for C<sub>18</sub>H<sub>31</sub>INO<sub>7</sub>: 500.1140, found 500.1138 [M+NH<sub>4</sub><sup>+</sup>].

**Methyl 2-((2*S*,3*R*)-2,7'-diethyl-5'-iodo-2'-oxo-4,5-dihydro-2*H*-spiro[furan-3,3'-indolin]-2-yl)acetate (**S26**)**

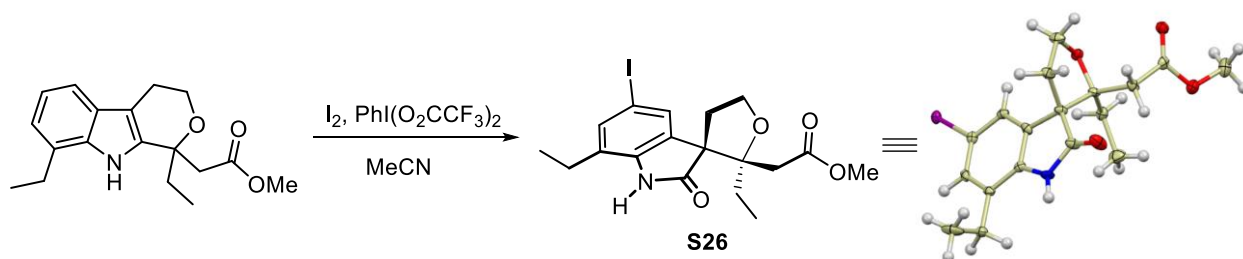

According to literature procedure, <sup>[12]</sup> methyl 2-(1,8-diethyl-1,3,4,9-tetrahydropyrano[3,4-*b*]indol-1-yl)acetate (903 mg, 3 mmol) and iodine (915 mg, 3.6 mmol) were dissolved in anhydrous CH<sub>3</sub>CN (50 mL). PhI(O<sub>2</sub>CCF<sub>3</sub>)<sub>2</sub> (3.1 g, 7.42 mmol) in CH<sub>3</sub>CN (60 mL) was

added dropwise to the above solution at room temperature. The reaction mixture stirred at room temperature overnight. The reaction mixture was quenched with 0.1M NaOH and then partition between diethyl ether and H<sub>2</sub>O. The combined organic layers were washed with brine, dried, filtered and concentrated. The resulting crude mixture was purified by flash column chromatography on silica gel (EtOAc/hexane, 1 : 6 v/v) to afford the desired product **S26** (1.1 g, 88%) as a colorless liquid.

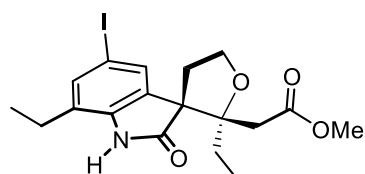

$[\alpha]_D = +35$  (c 0.10M, CHCl<sub>3</sub>). – <sup>1</sup>H NMR (500 MHz, CDCl<sub>3</sub>): 8.80 (1 H, s), 7.43 (2 H, s), 4.33 (1 H, td,  $J = 9.5, 4.2$  Hz), 4.17 (1 H, q,  $J = 8.7$  Hz), 3.65 (3 H, s), 3.05 (1 H, d,  $J = 14.4$  Hz), 2.87 (1 H, d,  $J = 14.4$  Hz), 2.80–2.72 (1 H, m), 2.56 (2 H, q,  $J = 7.6$  Hz), 2.18 (1 H, ddd,  $J = 12.9, 8.7, 4.2$  Hz), 1.90 (1 H, dq,  $J = 15.0, 7.6$  Hz), 1.51 (1 H, dq,  $J = 14.2, 7.3$  Hz), 1.23 (3 H, t,  $J = 7.6$  Hz), 0.61 (3 H, t,  $J = 7.5$  Hz) ppm. – <sup>13</sup>C NMR (125 MHz, CDCl<sub>3</sub>): 178.7, 171.1, 137.8, 136.6, 134.1, 131.4, 127.9, 88.5, 85.9, 64.5, 59.3, 51.7, 38.4, 36.5, 27.4, 23.9, 14.0, 8.4 ppm. – IR: 2984, 1756, 1628, 1598, 1459, 1433, 1378, 1332, 1259, 1230, 1121, 1051, 988, 899 cm<sup>-1</sup>. – HRMS: calcd for C<sub>18</sub>H<sub>23</sub>INO<sub>4</sub>: 444.0666, found 444.0671 [M+H<sup>+</sup>].

### 1-((4-Iodonaphthalen-1-yl)oxy)-3-(N-isopropylacetamido)propan-2-yl acetate (**S27**)

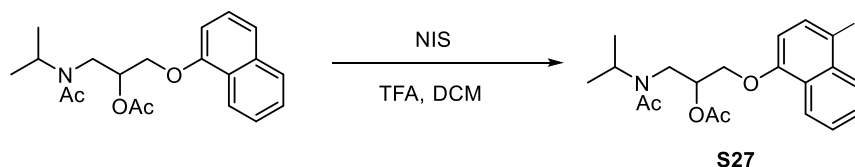

According to literature procedure, [ 13 ] 1-(N-isopropylacetamido)-3-(naphthalen-1-yloxy)propan-2-yl acetate (0.86 g, 2.5 mmol) was dissolved in anhydrous CH<sub>3</sub>CN (10 mL), followed by cooling to 0 °C. Trifluoroacetic acid (0.06 mL, 0.3 equiv.) was then added slowly. Subsequently, a solution of N-iodosuccinimide (675 mg, 3.0 mmol) in CH<sub>3</sub>CN (8 mL), was added dropwise to the initial solution over a period of 30 minutes, after which point the reaction was warmed to room temperature and stirred overnight. The reaction

was concentrated then diluted with dichloromethane and neutralized with concentrated ammonium hydroxide. The reaction mixture was then extracted with dichloromethane (4 x 25 mL). The combined organic layers were dried over sodium sulfate, filtered, and concentrated. The resulting crude mixture was purified by flash column chromatography on silica gel (EtOAc/hexane, 5 : 1 v/v) to afford the desired product **S27** (915 mg, 78%) as a brown solid.

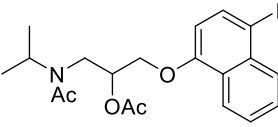
 M.p.: 79–81 °C. – <sup>1</sup>H NMR (500 MHz, CDCl<sub>3</sub>): 8.17 (1 H, d, *J* = 8.3 Hz), 8.01 (1 H, d, *J* = 8.4 Hz), 7.92 (1 H, d, *J* = 8.1 Hz), 7.61–7.54 (1 H, m), 7.51 (1 H, t, *J* = 7.6 Hz), 6.59 (1 H, d, *J* = 8.2 Hz), 5.69–5.52 (1 H, m), 4.38–4.07 (2 H, m), 4.13–4.00 (1 H, m), 3.83 (1 H, dd, *J* = 14.3, 5.6 Hz), 3.37 (1 H, dd, *J* = 14.3, 6.7 Hz), 2.44–1.94 (6 H, m), 1.53–1.05 (6 H, m) ppm. – <sup>13</sup>C NMR (125 MHz, CDCl<sub>3</sub>): 171.6, 170.6, 155.2, 137.0, 136.8, 134.8, 132.2, 131.9, 128.5, 128.3, 126.7, 126.6, 126.3, 122.5, 122.0, 106.8, 106.6, 88.8, 71.6, 70.9, 68.8, 67.3, 49.7, 47.4, 45.6, 41.5, 29.7, 22.9, 22.3, 21.9, 21.3, 21.1, 20.8, 20.4 ppm. – IR: 2979, 1732, 1622, 1590, 1453, 1419, 1366, 1342, 1259, 1235, 1126, 1058, 982, 896 cm<sup>-1</sup>. – HRMS: calcd for C<sub>20</sub>H<sub>25</sub>INO<sub>4</sub>: 470.0823, found 470.0818 [M+H<sup>+</sup>].

### Methyl 5-(4-iodo-2,5-dimethylphenoxy)-2,2-dimethylpentanoate (**S28**)

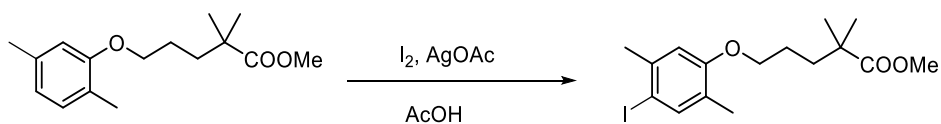

**S28**

Methyl 5-(2,5-dimethylphenoxy)-2,2-dimethylpentanoate (1.32 g, 5 mmol) was added to a mixture of iodine (1.27 g, 5 mmol) and silver acetate (0.83 g, 5 mmol) in acetic acid (15 mL) at room temperature. The reaction mixture stirred at room temperature overnight. The reaction mixture was quenched with 0.1M NaOH and then partition between diethyl ether and H<sub>2</sub>O. The combined organic layers were washed with brine, dried, filtered and concentrated. The resulting crude mixture was purified by flash column chromatography

on silica gel (EtOAc/hexane, 1 : 6 v/v) to afford the desired product **S28** (1.76 g, 90%) as a brown liquid.

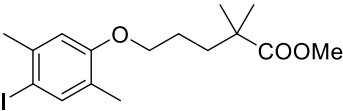 <sup>1</sup>H NMR (500 MHz, CDCl<sub>3</sub>): 7.51 (1 H, s), 6.67 (1 H, s), 3.89 (2 H, t, *J* = 5.6 Hz), 3.66 (3 H, s), 2.37 (3 H, s), 2.13 (3 H, s), 1.86–1.56 (4 H, m), 1.22 (6 H, s) ppm. – <sup>13</sup>C NMR (125 MHz, CDCl<sub>3</sub>): 178.3, 157.4, 140.0, 139.4, 126.6, 112.8, 89.1, 68.1, 51.8, 42.2, 37.1, 28.1, 25.3, 25.2, 15.3 ppm. – IR: 1728, 1607, 1493, 1471, 1360, 1312, 1245, 1197, 1140, 1087, 1048, 1031, 1020, 963 cm<sup>-1</sup>. – HRMS: calcd for C<sub>16</sub>H<sub>24</sub>IO<sub>3</sub>: 391.0765, found 391.0767 [M+H<sup>+</sup>].

### Methyl 4-(5-bromonicotinamido)butanoate (**S29**)

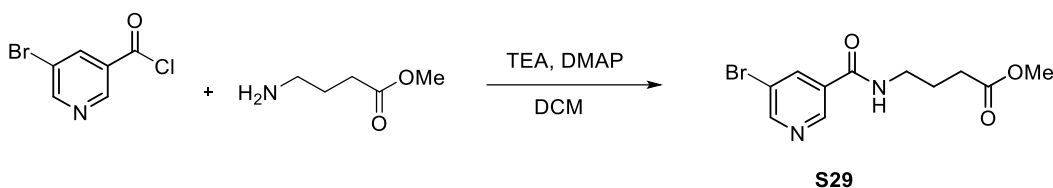

According to literature procedure,<sup>[14]</sup> 5-bromonicotinoyl chloride (660 mg, 3 mmol, 1.5 equiv.) was dissolved in DCM (10 mL) and added to a mixture of methyl 4-aminobutanoate (234 mg, 2 mmol), DMAP (24 mg, 0.2 mmol, 0.1 equiv.) and Et<sub>3</sub>N (303 mg, 3 mmol, 1.5 equiv.) in DCM (10 mL). The reaction was allowed to stirred overnight at room temperature. Then the mixture was quenched upon addition of 15 mL water and extracted with DCM (3 x 30 mL). The organic phases were combined and concentrated under reduced pressure and purified by flash chromatography on silica gel (EtOAc/hexane 3 : 1 v/v) afford the desired product **S29** (432 mg, 72%) as a colorless solid.

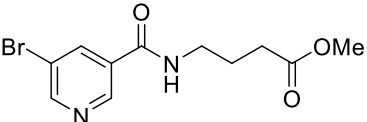 M.p.: 105–108 °C. – <sup>1</sup>H NMR (500 MHz, CD<sub>3</sub>CN): 8.90 (1 H, s), 8.77 (1 H, d, *J* = 1.8 Hz), 8.28 (1 H, s), 7.05 (1 H, s), 3.69 (3 H, s), 3.52 (2 H, q, *J* = 6.3 Hz), 2.48 (2 H, t, *J* = 6.7 Hz), 1.97 (2 H, p, *J* = 6.7 Hz) ppm. – <sup>13</sup>C NMR (125 MHz, CD<sub>3</sub>CN): 174.7, 164.3, 153.3, 146.0, 138.0, 131.6, 121.1, 52.1, 40.3, 32.0, 24.1 ppm. – IR: 3390, 1704, 1633, 1588, 1547, 1439, 1365, 1329,

1228, 1175, 1091, 988  $\text{cm}^{-1}$ . – HRMS: calcd for  $\text{C}_{11}\text{H}_{14}\text{BrN}_2\text{O}_3$ : 301.0182, found 301.0182 [M+H<sup>+</sup>].

## Borylation products

### 4,4,5,5-Tetramethyl-2-(*p*-tolyl)-1,3,2-dioxaborolane (**2**)<sup>[15]</sup>

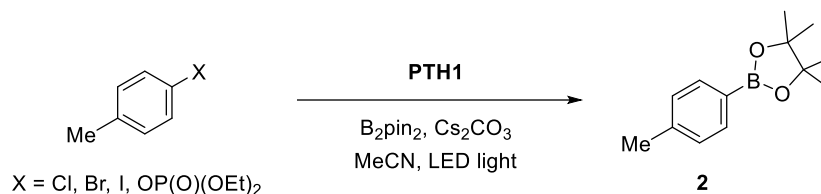

**From 1-iodo-4-methylbenzene:** The general procedure GP1 was followed with 1-iodo-4-methylbenzene (44 mg, 0.2 mmol),  $\text{B}_2\text{pin}_2$  (101 mg, 0.4 mmol, 2.0 equiv.),  $\text{Cs}_2\text{CO}_3$  (132 mg, 0.4 mmol, 2.0 equiv.), **PTH1** (0.2 mg, 0.001 mmol, 0.5 mol%) and  $\text{CH}_3\text{CN}$  (2 mL). The mixture was irradiated with a 400 nm LED light for 24 h. Purification by flash chromatography on silica gel (EtOAc/hexane, 1 : 19 v/v) afford product **2** (40 mg, 92%) as a colorless oil.

**From 1-bromo-4-methylbenzene:** The general procedure GP1 was followed with 1-bromo-4-methylbenzene (34 mg, 0.2 mmol),  $\text{B}_2\text{pin}_2$  (101 mg, 0.4 mmol, 2.0 equiv.),  $\text{Cs}_2\text{CO}_3$  (132 mg, 0.4 mmol, 2.0 equiv.), **PTH1** (0.8 mg, 0.004 mmol, 2 mol%) and  $\text{CH}_3\text{CN}$  (2 mL). The mixture was irradiated with a 400 nm LED light for 48 h. Purification by flash chromatography on silica gel (EtOAc/hexane, 1 : 19 v/v) afford product **2** (30 mg, 69%) as a colorless oil.

**From 1-chloro-4-methylbenzene:** The general procedure GP1 was followed with 1-chloro-4-methylbenzene (25 mg, 0.2 mmol),  $\text{B}_2\text{pin}_2$  (152 mg, 0.6 mmol, 3.0 equiv.),  $\text{Cs}_2\text{CO}_3$  (197 mg, 0.6 mmol, 3.0 equiv.), **PTH1** (2.0 mg, 0.01 mmol, 5 mol%),  $\text{H}_2\text{O}$  (3.6 mg, 0.2 mmol, 1.0 equiv.) and  $\text{CH}_3\text{CN}$  (2 mL). The mixture was irradiated with a 400 nm LED light without air flow supply for 24 h. Purification by flash chromatography on silica gel (EtOAc/hexane, 1 : 19 v/v) afford product **2** (31 mg, 80%) as a colorless oil.

**From diethyl *p*-tolyl phosphate:** The general procedure GP1 was followed with diethyl *p*-tolyl phosphate (46 mg, 0.2 mmol), B<sub>2</sub>pin<sub>2</sub> (152 mg, 0.6 mmol, 3.0 equiv.), Cs<sub>2</sub>CO<sub>3</sub> (197 mg, 0.6 mmol, 3.0 equiv.), **PTH1** (4.0 mg, 0.02 mmol, 10 mol%) and CH<sub>3</sub>CN (2 mL). The mixture was irradiated with a 400 nm LED light without air flow supply for 36 h. Purification by flash chromatography on silica gel (EtOAc/hexane, 1 : 19 v/v) afforded product **2** (36 mg, 83%) as a colorless oil.

**From diethyl *p*-tolyl phosphate with 2 equiv. of B<sub>2</sub>pin<sub>2</sub>:** The general procedure GP1 was followed with diethyl *p*-tolyl phosphate (46 mg, 0.2 mmol), B<sub>2</sub>pin<sub>2</sub> (101 mg, 0.4 mmol, 2.0 equiv.), Cs<sub>2</sub>CO<sub>3</sub> (197 mg, 0.6 mmol, 3.0 equiv.), **PTH1** (4.0 mg, 0.02 mmol, 10 mol%) and CH<sub>3</sub>CN (2 mL). The mixture was irradiated with a 400 nm LED light without air flow supply for 36 h. Purification by flash chromatography on silica gel (EtOAc/hexane, 1 : 19 v/v) afforded product **2** (28 mg, 64%) as a colorless oil.

**From diethyl *p*-tolyl phosphate with addition of H<sub>2</sub>O:** The general procedure GP1 was followed with diethyl *p*-tolyl phosphate (46 mg, 0.2 mmol), B<sub>2</sub>pin<sub>2</sub> (152 mg, 0.6 mmol, 3.0 equiv.), Cs<sub>2</sub>CO<sub>3</sub> (197 mg, 0.6 mmol, 3.0 equiv.), **PTH1** (4.0 mg, 0.02 mmol, 10 mol%), H<sub>2</sub>O (3.6 mg, 0.2 mmol, 1.0 equiv.) and CH<sub>3</sub>CN (2 mL). The mixture was irradiated with a 400 nm LED light at 45 °C for 20 h. Purification by flash chromatography on silica gel (EtOAc/hexane, 1 : 19 v/v) afforded product **2** (34 mg, 78%) as a colorless oil.

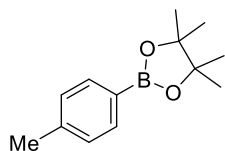

<sup>1</sup>H NMR (500 MHz, CDCl<sub>3</sub>): 7.72 (2 H, d, *J* = 7.7 Hz), 7.20 (2 H, d, *J* = 7.6 Hz), 2.38 (3 H, s), 1.35 (12 H, s) ppm. – <sup>13</sup>C NMR (125 MHz, CDCl<sub>3</sub>): 141.5, 134.9, 128.6, 83.7, 25.0, 21.9 ppm. – <sup>11</sup>B NMR (160.4 Hz, CDCl<sub>3</sub>):

31.0 ppm. – IR: 2983, 1735, 1446, 1372, 1360, 1235, 1145, 1089, 1044, 938 cm<sup>-1</sup>.

### 4,4,5,5-Tetramethyl-2-phenyl-1,3,2-dioxaborolane (**3**)<sup>[15]</sup>

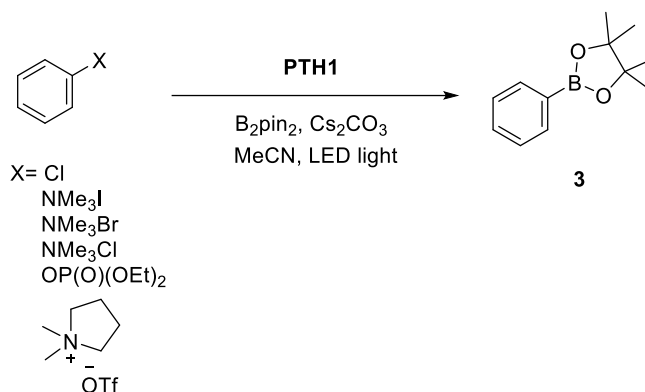

**From chlorobenzene:** The general procedure GP1 was followed with chlorobenzene (22 mg, 0.2 mmol), B<sub>2</sub>pin<sub>2</sub> (152 mg, 0.6 mmol, 3.0 equiv.), Cs<sub>2</sub>CO<sub>3</sub> (197 mg, 0.6 mmol, 3.0 equiv.), **PTH1** (2.0 mg, 0.01 mmol, 5 mol%), H<sub>2</sub>O (3.6 mg, 0.2 mmol, 1.0 equiv.) and CH<sub>3</sub>CN (2 mL). The mixture was irradiated with a 400 nm LED light without air flow supply for 24 h. Purification by flash chromatography on silica gel (EtOAc/hexane, 1 : 19 v/v) afford product **3** (28 mg, 68%) as a colorless oil.

**From *N,N,N*-trimethylbenzenaminium iodide:** The general procedure GP1 was followed with *N,N,N*-trimethylbenzenaminium iodide (53 mg, 0.2 mmol), B<sub>2</sub>pin<sub>2</sub> (152 mg, 0.6 mmol, 3.0 equiv.), Cs<sub>2</sub>CO<sub>3</sub> (197 mg, 0.6 mmol, 3.0 equiv.), **PTH1** (2.0 mg, 0.01 mmol, 5 mol%) and CH<sub>3</sub>CN (2 mL). The mixture was irradiated with a 400 nm LED light for 18 h. Purification by flash chromatography on silica gel (EtOAc/hexane, 1 : 19 v/v) afford product **3** (36 mg, 88%) as a colorless oil.

**From *N,N,N*-trimethylbenzenaminium iodide with 420 nm LED light:** The general procedure GP1 was followed with *N,N,N*-trimethylbenzenaminium iodide (53 mg, 0.2 mmol), B<sub>2</sub>pin<sub>2</sub> (152 mg, 0.6 mmol, 3.0 equiv.), Cs<sub>2</sub>CO<sub>3</sub> (197 mg, 0.6 mmol, 3.0 equiv.), **PTH1** (2.0 mg, 0.01 mmol, 5 mol%) and CH<sub>3</sub>CN (2 mL). The mixture was irradiated with a 420 nm LED light for 18 h. Purification by flash chromatography on silica gel (EtOAc/hexane, 1 : 19 v/v) afford product **3** (34 mg, 83%) as a colorless oil.

**From *N,N,N*-trimethylbenzenaminium bromide:** The general procedure GP1 was followed with *N,N,N*-trimethylbenzenaminium bromide (43 mg, 0.2 mmol), B<sub>2</sub>pin<sub>2</sub> (152 mg, 0.6 mmol, 3.0 equiv.), Cs<sub>2</sub>CO<sub>3</sub> (197 mg, 0.6 mmol, 3.0 equiv.), PTH1 (2.0 mg, 0.01 mmol, 5 mol%) and CH<sub>3</sub>CN (2 mL). The mixture was irradiated with a 400 nm LED light for 18 h. Purification by flash chromatography on silica gel (EtOAc/hexane, 1 : 19 v/v) afford product **3** (31 mg, 76%) as a colorless oil.

**From *N,N,N*-trimethylbenzenaminium chloride:** The general procedure GP1 was followed with *N,N,N*-trimethylbenzenaminium chloride (34 mg, 0.2 mmol), B<sub>2</sub>pin<sub>2</sub> (152 mg, 0.6 mmol, 3.0 equiv.), Cs<sub>2</sub>CO<sub>3</sub> (197 mg, 0.6 mmol, 3.0 equiv.), PTH1 (2.0 mg, 0.01 mmol, 5 mol%) and CH<sub>3</sub>CN (2 mL). The mixture was irradiated with a 400 nm LED light for 18 h. Purification by flash chromatography on silica gel (EtOAc/hexane, 1 : 19 v/v) afford product **3** (29 mg, 71%) as a colorless oil.

**From 1-methyl-1-phenylpyrrolidin-1-ium((trifluoromethyl)sulfonyl)-λ<sup>1</sup>-oxidane:** The general procedure GP1 was followed with 1-methyl-1-phenylpyrrolidin-1-ium((trifluoromethyl)sulfonyl)-λ<sup>1</sup>-oxidane (62 mg, 0.2 mmol), B<sub>2</sub>pin<sub>2</sub> (152 mg, 0.6 mmol, 3.0 equiv.), Cs<sub>2</sub>CO<sub>3</sub> (197 mg, 0.6 mmol, 3.0 equiv.), PTH1 (2.0 mg, 0.01 mmol, 5 mol%) and CH<sub>3</sub>CN (2 mL). The mixture was irradiated with a 400 nm LED light for 18 h. Purification by flash chromatography on silica gel (EtOAc/hexane, 1 : 19 v/v) afford product **3** (34 mg, 83%) as a colorless oil.

**From diethyl phenyl phosphate:** The general procedure GP1 was followed with diethyl phenyl phosphate (46 mg, 0.2 mmol), B<sub>2</sub>pin<sub>2</sub> (152 mg, 0.6 mmol, 3.0 equiv.), Cs<sub>2</sub>CO<sub>3</sub> (197 mg, 0.6 mmol, 3.0 equiv.), PTH1 (4.0 mg, 0.02 mmol, 10 mol%) and CH<sub>3</sub>CN (2 mL). The mixture was irradiated with an 400 m LED light without air flow supply for 36 h. Purification by flash chromatography on silica gel (EtOAc/hexane, 1 : 19 v/v) afford product **3** (34 mg, 84%) as a colorless oil.

**From diethyl phenyl phosphate with 2 equiv. of B<sub>2</sub>pin<sub>2</sub>:** The general procedure GP1 was followed with diethyl phenyl phosphate (46 mg, 0.2 mmol), B<sub>2</sub>pin<sub>2</sub> (101 mg, 0.4 mmol, 2.0



equiv.), Cs<sub>2</sub>CO<sub>3</sub> (197 mg, 0.6 mmol, 3.0 equiv.), **PTH1** (4.0 mg, 0.02 mmol, 10 mol%) and CH<sub>3</sub>CN (2 mL). The mixture was irradiated with an 400 m LED light without air flow supply for 36 h. Purification by flash chromatography on silica gel (EtOAc/hexane, 1 : 19 v/v) afford product **3** (31 mg, 80%) as a colorless oil.

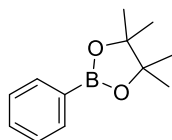

<sup>1</sup>H NMR (500 MHz, CDCl<sub>3</sub>): 7.82 (2 H, d, *J* = 6.9 Hz), 7.46 (1 H, t, *J* = 7.4 Hz), 7.37 (2 H, t, *J* = 7.4 Hz), 1.35 (12 H, s) ppm. – <sup>13</sup>C NMR (125 MHz, CDCl<sub>3</sub>): 134.9, 131.4, 127.8, 83.9, 25.0 ppm. – <sup>11</sup>B NMR (160.4 Hz, CDCl<sub>3</sub>): 31.0 ppm.

– IR: 2977, 1738, 1604, 1498, 1438, 1358, 1324, 1274, 1216, 1144, 1090, 1027 cm<sup>-1</sup>.

#### 4,4,5,5-Tetramethyl-2-(*o*-tolyl)-1,3,2-dioxaborolane (**4**)<sup>[15]</sup>

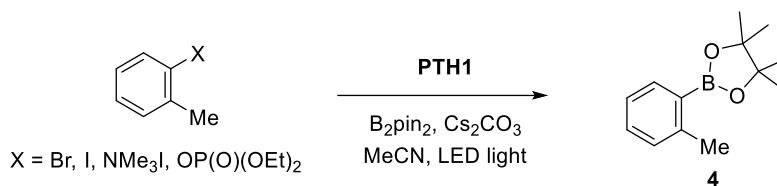

**From 1-bromo-2-methylbenzene:** The general procedure GP1 was followed with 1-bromo-2-methylbenzene (34 mg, 0.2 mmol), B<sub>2</sub>pin<sub>2</sub> (101 mg, 0.4 mmol, 2.0 equiv.), Cs<sub>2</sub>CO<sub>3</sub> (132 mg, 0.4 mmol, 2.0 equiv.), **PTH1** (0.8 mg, 0.004 mmol, 2 mol%) and CH<sub>3</sub>CN (2 mL). The mixture was irradiated with a 400 nm LED light for 48 h. Purification by flash chromatography on silica gel (EtOAc/hexane, 1 : 19 v/v) afford product **4** (37 mg, 85%) as a colorless oil.

**From 1-iodo-2-methylbenzene:** The general procedure GP1 was followed with 1-iodo-2-methylbenzene (44 mg, 0.2 mmol), B<sub>2</sub>pin<sub>2</sub> (101 mg, 0.4 mmol, 2.0 equiv.), Cs<sub>2</sub>CO<sub>3</sub> (132 mg, 0.4 mmol, 2.0 equiv.), **PTH1** (0.4 mg, 0.002 mmol, 1 mol%) and CH<sub>3</sub>CN (2 mL). The mixture was irradiated with a 400 nm LED light for 24 h. Purification by flash chromatography on silica gel (EtOAc/hexane, 1 : 19 v/v) afford product **4** (38 mg, 87%) as a colorless oil.

**From *N,N,N,2*-tetramethylbenzenaminium iodide:** The general procedure GP1 was followed with *N,N,N,2*-tetramethylbenzenaminium iodide (56 mg, 0.2 mmol), B<sub>2</sub>pin<sub>2</sub> (152 mg, 0.6 mmol, 3.0 equiv.), Cs<sub>2</sub>CO<sub>3</sub> (197 mg, 0.6 mmol, 3.0 equiv.), PTH1 (2.0 mg, 0.01 mmol, 5 mol%) and CH<sub>3</sub>CN (2 mL). The mixture was irradiated with a 400 nm LED light for 18 h. Purification by flash chromatography on silica gel (EtOAc/hexane, 1 : 19 v/v) afford product **4** (34 mg, 78%) as a colorless oil.

**Gram scale from *N,N,N,2*-tetramethylbenzenaminium iodide:** According to general procedure GP1 three identical reactions were run with *N,N,N,2*-tetramethylbenzenaminium iodide (0.98 g, 3.5 mmol), B<sub>2</sub>pin<sub>2</sub> (2.67 g, 10.5 mmol, 3.0 equiv.), Cs<sub>2</sub>CO<sub>3</sub> (3.45 g, 10.5 mmol, 3.0 equiv.), PTH1 (34.9 mg, 0.175 mmol, 5 mol%) and CH<sub>3</sub>CN (2 mL). The mixture was irradiated with a 450 nm LED light for 36 h. Purification by flash chromatography on silica gel (EtOAc/hexane, 1 : 19 v/v) afforded product **4** (1.7 g, 78%) as a colorless solid.

**From *N,N,N,2*-tetramethylbenzenaminium iodide with 420 nm LED light:** The general procedure GP1 was followed with *N,N,N,2*-tetramethylbenzenaminium iodide (56 mg, 0.2 mmol), B<sub>2</sub>pin<sub>2</sub> (152 mg, 0.6 mmol, 3.0 equiv.), Cs<sub>2</sub>CO<sub>3</sub> (197 mg, 0.6 mmol, 3.0 equiv.), PTH1 (2.0 mg, 0.01 mmol, 5 mol%) and CH<sub>3</sub>CN (2 mL). The mixture was irradiated with a 420 nm LED light for 18 h. Purification by flash chromatography on silica gel (EtOAc/hexane, 1 : 19 v/v) afford product **4** (39 mg, 89%) as a colorless oil.

**From diethyl *o*-tolyl phosphate:** The general procedure GP1 was followed with diethyl *o*-tolyl phosphate (49 mg, 0.2 mmol), B<sub>2</sub>pin<sub>2</sub> (152 mg, 0.6 mmol, 3.0 equiv.), Cs<sub>2</sub>CO<sub>3</sub> (197 mg, 0.6 mmol, 3.0 equiv.), PTH1 (4.0 mg, 0.02 mmol, 10 mol%), H<sub>2</sub>O (3.6 mg, 0.2 mmol, 1.0 equiv.) and CH<sub>3</sub>CN (2 mL). The mixture was irradiated with an 400 m LED light without air flow supply for 24 h. Purification by flash chromatography on silica gel (EtOAc/hexane, 1 : 19 v/v) afford product **4** (28 mg, 80%) as a colorless oil.

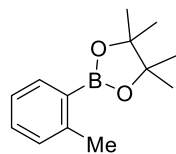

$^1\text{H}$  NMR (500 MHz,  $\text{CDCl}_3$ ): 7.76 (1 H, d,  $J = 7.2$  Hz), 7.31 (1 H, t,  $J = 7.3$  Hz), 7.16 (2 H, t,  $J = 6.5$  Hz), 2.54 (3 H, s), 1.34 (12 H, s) ppm. –  $^{13}\text{C}$  NMR (125 MHz,  $\text{CDCl}_3$ ): 145.0, 136.0, 130.9, 129.9, 124.8, 83.6, 25.0, 22.4 ppm. –  $^{11}\text{B}$  NMR (160.4 Hz,  $\text{CDCl}_3$ ): 31.3 ppm. – IR: 2977, 2928, 1601, 1490, 1439, 1379, 1345, 1311, 1273, 1213, 1145, 1072  $\text{cm}^{-1}$ .

#### 4,4,5,5-Tetramethyl-2-(*m*-tolyl)-1,3,2-dioxaborolane (**5**)<sup>[15]</sup>

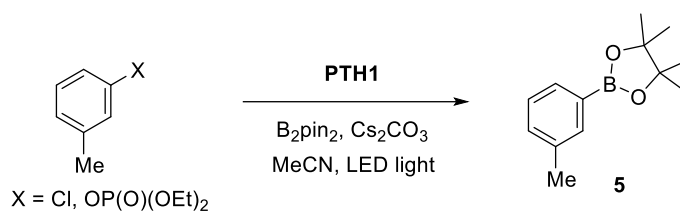

**From 1-chloro-3-methylbenzene:** The general procedure GP1 was followed with 1-chloro-3-methylbenzene (25 mg, 0.2 mmol),  $\text{B}_2\text{pin}_2$  (152 mg, 0.6 mmol, 3.0 equiv.),  $\text{Cs}_2\text{CO}_3$  (197 mg, 0.6 mmol, 3.0 equiv.), **PTH1** (2.0 mg, 0.01 mmol, 5 mol%),  $\text{H}_2\text{O}$  (3.6 mg, 0.2 mmol, 1.0 equiv.) and  $\text{CH}_3\text{CN}$  (2 mL). The mixture was irradiated with a 400 nm LED light without air flow supply for 24 h. Purification by flash chromatography on silica gel (EtOAc/hexane, 1 : 19 v/v) afford product **5** (32 mg, 77%) as a colorless oil.

**From diethyl *m*-tolyl phosphate:** The general procedure GP1 was followed with diethyl *m*-tolyl phosphate (49 mg, 0.2 mmol),  $\text{B}_2\text{pin}_2$  (152 mg, 0.6 mmol, 3.0 equiv.),  $\text{Cs}_2\text{CO}_3$  (197 mg, 0.6 mmol, 3.0 equiv.), **PTH1** (4.0 mg, 0.020 mmol, 10 mol%),  $\text{H}_2\text{O}$  (3.6 mg, 0.2 mmol, 1.0 equiv.) and  $\text{CH}_3\text{CN}$  (2 mL). The mixture was irradiated with an 400 m LED light without air flow supply for 24 h. Purification by flash chromatography on silica gel (EtOAc/hexane, 1 : 19 v/v) afford product **5** (29 mg, 84%) as a colorless oil.

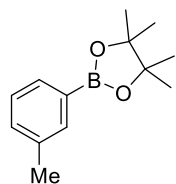

$^1\text{H}$  NMR (500 MHz,  $\text{CDCl}_3$ ): 7.65 (1 H, s), 7.64–7.59 (1 H, m), 7.31–7.27 (2 H, m), 2.36 (3 H, s), 1.35 (12 H, s) ppm. –  $^{13}\text{C}$  NMR (125 MHz,  $\text{CDCl}_3$ ): 137.3,

135.5, 132.2, 131.9, 127.8, 83.9, 25.0, 21.4 ppm. –  $^{11}\text{B}$  NMR (160.4 Hz,  $\text{CDCl}_3$ ): 31.0 ppm. – IR: 2976, 2927, 1738, 1606, 1583, 1416, 1353, 1267, 1207, 112, 1102, 1078  $\text{cm}^{-1}$ .

**2-(4-(*tert*-Butyl)phenyl)-4,4,5,5-tetramethyl-1,3,2-dioxaborolane (6)**<sup>[15]</sup>

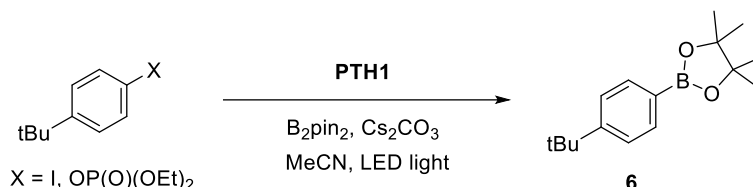

**From 1-(*tert*-butyl)-4-iodobenzene:** The general procedure GP1 was followed with 1-(*tert*-butyl)-4-iodobenzene (52 mg, 0.2 mmol), B<sub>2</sub>pin<sub>2</sub> (101 mg, 0.4 mmol, 2.0 equiv.), Cs<sub>2</sub>CO<sub>3</sub> (132 mg, 0.4 mmol, 2.0 equiv.), PTH1 (0.08 mg, 0.0004 mmol, 0.2 mol%) and CH<sub>3</sub>CN (2 mL). The mixture was irradiated with a 400 nm LED light for 24 h. Purification by flash chromatography on silica gel (EtOAc/hexane, 1 : 19 v/v) afford product 6 (42 mg, 81%) as a colorless solid.

**From 4-(*tert*-butyl)phenyl diethyl phosphate:** The general procedure GP1 was followed with 4-(*tert*-butyl)phenyl diethyl phosphate (58 mg, 0.2 mmol), B<sub>2</sub>pin<sub>2</sub> (152 mg, 0.6 mmol, 3.0 equiv.), Cs<sub>2</sub>CO<sub>3</sub> (197 mg, 0.6 mmol, 3.0 equiv.), PTH1 (4.0 mg, 0.020 mmol, 10 mol%) and CH<sub>3</sub>CN (2 mL). The mixture was irradiated with a 400 nm LED light without air flow supply for 48 h. Purification by flash chromatography on silica gel (EtOAc/hexane, 1 : 19 v/v) afforded product 6 (31 mg, 60%) as a colorless solid.

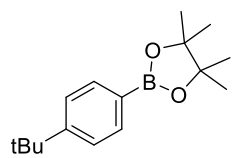

M.p.: 139–141 °C. –  $^1\text{H}$  NMR (500 MHz,  $\text{CDCl}_3$ ): 7.77 (2 H, d,  $J = 8.2$  Hz), 7.42 (2 H, d,  $J = 8.2$  Hz), 1.34 (12 H, s), 1.33 (9 H, s) ppm. –  $^{13}\text{C}$  NMR (125 MHz,  $\text{CDCl}_3$ ): 154.6, 134.8, 124.8, 83.7, 35.0, 31.3, 25.0 ppm. –  $^{11}\text{B}$  NMR (160.4 Hz,  $\text{CDCl}_3$ ): 31.0 ppm. – IR: 2964, 1611, 1462, 1400, 1362, 1323, 1271, 1214, 1144, 1118  $\text{cm}^{-1}$ .

## 2-(3-(*tert*-Butyl)phenyl)-4,4,5,5-tetramethyl-1,3,2-dioxaborolane (7)<sup>[16]</sup>

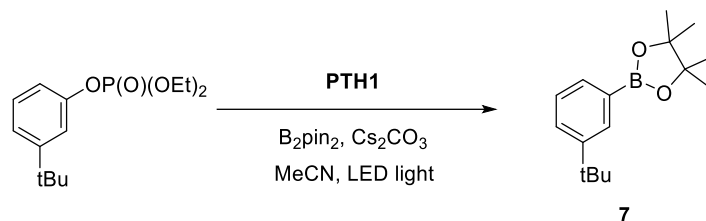

The general procedure GP1 was followed with 3-(*tert*-butyl)phenyl diethyl phosphate (58 mg, 0.2 mmol), B<sub>2</sub>pin<sub>2</sub> (152 mg, 0.6 mmol, 3.0 equiv.), Cs<sub>2</sub>CO<sub>3</sub> (197 mg, 0.6 mmol, 3.0 equiv.), **PTH1** (4.8 mg, 0.024 mmol, 12 mol%) and CH<sub>3</sub>CN (2 mL). The mixture was irradiated with a 400 nm LED light without air flow supply for 48 h. Purification by flash chromatography on silica gel (EtOAc/hexane, 1 : 19 v/v) afforded product **7** (30 mg, 57%) as a colorless oil.

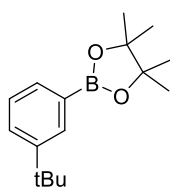

<sup>1</sup>H NMR (500 MHz, CDCl<sub>3</sub>): 7.86 (1 H, s), 7.66 (1 H, d, *J* = 7.3 Hz), 7.52 (1 H, ddd, *J* = 7.9, 2.2, 1.3 Hz), 7.33 (1 H, t, *J* = 7.6 Hz), 1.37 (21 H, s) ppm. –  
<sup>13</sup>C NMR (125 MHz, CDCl<sub>3</sub>): 150.3, 132.2, 131.5, 128.5, 127.6, 83.8, 34.8, 31.6, 25.0 ppm. –  
<sup>11</sup>B NMR (160.4 Hz, CDCl<sub>3</sub>): 31.1 ppm. – IR: 2965, 1603, 1477, 1414, 1354, 1313, 1260, 1213, 1145, 1102, 1081, 963 cm<sup>-1</sup>.

## 4,4,5,5-Tetramethyl-2-(5,6,7,8-tetrahydronaphthalen-2-yl)-1,3,2-dioxaborolane (8)<sup>[17]</sup>

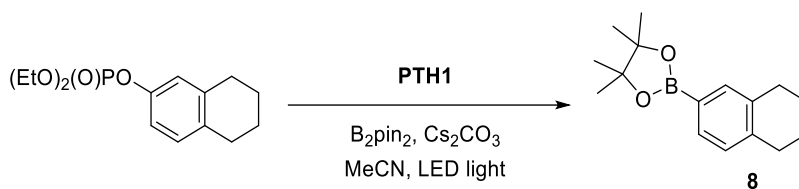

The general procedure GP1 was followed with diethyl (5,6,7,8-tetrahydronaphthalen-2-yl) phosphate (57 mg, 0.2 mmol), B<sub>2</sub>pin<sub>2</sub> (152 mg, 0.6 mmol, 3.0 equiv.), Cs<sub>2</sub>CO<sub>3</sub> (197 mg, 0.6 mmol, 3.0 equiv.), **PTH1** (4.0 mg, 0.02 mmol, 10 mol%) and CH<sub>3</sub>CN (2 mL). The

mixture was irradiated with a 400 nm LED light without air flow supply for 72 h. Purification by flash chromatography on silica gel (EtOAc/hexane, 1 : 19 v/v) afforded **8** (30 mg, 57%) as a colorless liquid.

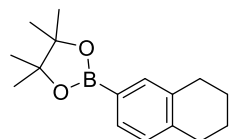

$^1\text{H}$  NMR (500 MHz,  $\text{CDCl}_3$ ): 7.54 (1 H, s), 7.52 (1 H, s), 7.08 (1 H, d,  $J = 7.4$  Hz), 2.78 (4 H, s), 1.80 (4 H, p,  $J = 3.1$  Hz), 1.34 (12 H, s) ppm. –  $^{13}\text{C}$  NMR (125 MHz,  $\text{CDCl}_3$ ): 140.9, 136.6, 135.8, 131.8, 128.8, 83.7, 29.8, 29.3, 25.0, 23.4, 23.2 ppm. –  $^{11}\text{B}$  NMR (160.4 Hz,  $\text{CDCl}_3$ ): 30.8 ppm. – IR: 1738, 1635, 1612, 1407, 1363, 1350, 1310, 1238, 1183, 1145, 1090, 1045, 964, 910  $\text{cm}^{-1}$ .

### 2-(4-Methoxyphenyl)-4,4,5,5-tetramethyl-1,3,2-dioxaborolane (**9**)<sup>[15]</sup>

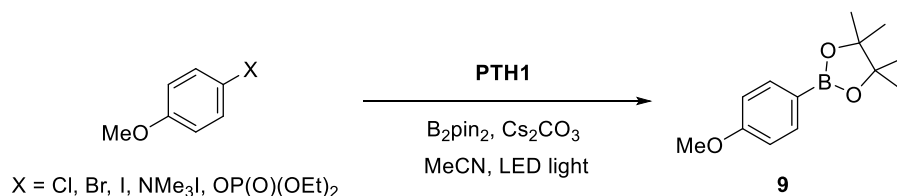

**From 1-iodo-4-methoxybenzene:** The general procedure GP1 was followed with 1-iodo-4-methoxybenzene (47 mg, 0.2 mmol),  $\text{B}_2\text{pin}_2$  (101 mg, 0.4 mmol, 2.0 equiv.),  $\text{Cs}_2\text{CO}_3$  (132 mg, 0.4 mmol, 2.0 equiv.), **PTH1** (0.2 mg, 0.001 mmol, 0.5 mol%) and  $\text{CH}_3\text{CN}$  (2 mL). The mixture was irradiated with a 400 nm LED light for 24 h. Purification by flash chromatography on silica gel (EtOAc/hexane, 1 : 15 v/v) afford product **9** (44 mg, 94%) as a colorless oil.

**From 1-iodo-4-methoxybenzene with 1.2 equiv. of  $\text{B}_2\text{pin}_2$ :** The general procedure GP1 was followed with 1-iodo-4-methoxybenzene (47 mg, 0.2 mmol),  $\text{B}_2\text{pin}_2$  (61 mg, 0.24 mmol, 1.2 equiv.),  $\text{Cs}_2\text{CO}_3$  (132 mg, 0.4 mmol, 2.0 equiv.), **PTH1** (0.2 mg, 0.001 mmol, 0.5 mol%) and  $\text{CH}_3\text{CN}$  (2 mL). The mixture was irradiated with a 400 nm LED light for 24 h. Purification by flash chromatography on silica gel (EtOAc/hexane, 1 : 15 v/v) afford product **9** (44 mg, 94%) as a colorless oil.

**From 1-bromo-4-methoxybenzene:** The general procedure GP1 was followed with 1-bromo-4-methoxybenzene (36 mg, 0.2 mmol), B<sub>2</sub>pin<sub>2</sub> (101 mg, 0.4 mmol, 2.0 equiv.), Cs<sub>2</sub>CO<sub>3</sub> (132 mg, 0.4 mmol, 2.0 equiv.), PTH1 (0.8 mg, 0.004 mmol, 2 mol%) and CH<sub>3</sub>CN (2 mL). The mixture was irradiated with a 400 nm LED light for 48 h. Purification by flash chromatography on silica gel (EtOAc/hexane, 1 : 15 v/v) afford product **9** (42 mg, 90%) as a colorless oil.

**From 1-chloro-4-methoxybenzene:** The general procedure GP1 was followed with 1-chloro-4-methoxybenzene (28 mg, 0.2 mmol), B<sub>2</sub>pin<sub>2</sub> (101 mg, 0.4 mmol, 2.0 equiv.), Cs<sub>2</sub>CO<sub>3</sub> (132 mg, 0.4 mmol, 2.0 equiv.), PTH1 (2 mg, 0.01 mmol, 5 mol%), H<sub>2</sub>O (3.6 mg, 0.2 mmol, 1.0 equiv.) and CH<sub>3</sub>CN (2 mL). The mixture was irradiated with a 400 nm LED light without air flow supply for 24 h. Purification by flash chromatography on silica gel (EtOAc/hexane, 1 : 15 v/v) afford product **9** (38 mg, 72%) as a colorless oil.

**From 4-methoxy-*N,N,N*-trimethylbenzenaminium iodide:** The general procedure GP1 was followed with 4-methoxy-*N,N,N*-trimethylbenzenaminium iodide (59 mg, 0.2 mmol), B<sub>2</sub>pin<sub>2</sub> (152 mg, 0.6 mmol, 3.0 equiv.), Cs<sub>2</sub>CO<sub>3</sub> (197 mg, 0.6 mmol, 3.0 equiv.), PTH1 (2.0 mg, 0.01 mmol, 5 mol%) and CH<sub>3</sub>CN (2 mL). The mixture was irradiated with a 400 nm LED light for 16 h. Purification by flash chromatography on silica gel (EtOAc/hexane, 1 : 15 v/v) afford product **9** (40 mg, 85%) as a colorless oil.

**From 4-methoxy-*N,N,N*-trimethylbenzenaminium iodide with 420 nm LED light:** The general procedure GP1 was followed with 4-methoxy-*N,N,N*-trimethylbenzenaminium iodide (59 mg, 0.2 mmol), B<sub>2</sub>pin<sub>2</sub> (152 mg, 0.6 mmol, 3.0 equiv.), Cs<sub>2</sub>CO<sub>3</sub> (197 mg, 0.6 mmol, 3.0 equiv.), PTH1 (2.0 mg, 0.01 mmol, 5 mol%) and CH<sub>3</sub>CN (2 mL). The mixture was irradiated with a 420 nm LED light for 18 h. Purification by flash chromatography on silica gel (EtOAc/hexane, 1 : 15 v/v) afford product **9** (39 mg, 83%) as a colorless oil.

**From 4-methoxy-*N,N,N*-trimethylbenzenaminium iodide with 2 equiv. of B<sub>2</sub>pin<sub>2</sub>:** The general procedure GP1 was followed with 4-methoxy-*N,N,N*-trimethylbenzenaminium iodide (59 mg, 0.2 mmol), B<sub>2</sub>pin<sub>2</sub> (76 mg, 0.3 mmol, 1.5 equiv.), Cs<sub>2</sub>CO<sub>3</sub> (197 mg, 0.6 mmol,

3.0 equiv.), **PTH1** (2.0 mg, 0.01 mmol, 5 mol%) and CH<sub>3</sub>CN (2 mL). The mixture was irradiated with a 420 nm LED light for 18 h. Purification by flash chromatography on silica gel (EtOAc/hexane, 1 : 15 v/v) afford product **9** (34 mg, 73%) as a colorless oil.

**From diethyl (4-methoxyphenyl) phosphate:** The general procedure GP1 was followed with diethyl (4-methoxyphenyl) phosphate (52 mg, 0.2 mmol), B<sub>2</sub>pin<sub>2</sub> (152 mg, 0.6 mmol, 3.0 equiv.), Cs<sub>2</sub>CO<sub>3</sub> (197 mg, 0.6 mmol, 3.0 equiv.), **PTH1** (4.0 mg, 0.020 mmol, 10 mol%), H<sub>2</sub>O (3.6 mg, 0.2 mmol, 1.0 equiv.) and CH<sub>3</sub>CN (2 mL). The mixture was irradiated with a 400 nm LED light without air flow supply for 24 h. Purification by flash chromatography on silica gel (EtOAc/hexane, 1 : 15 v/v) afforded product **9** (34 mg, 72%) as a colorless oil.

**From diethyl (4-methoxyphenyl) phosphate with 2 equiv. of B<sub>2</sub>pin<sub>2</sub>:** The general procedure GP1 was followed with diethyl (4-methoxyphenyl) phosphate (52 mg, 0.2 mmol), B<sub>2</sub>pin<sub>2</sub> (101 mg, 0.4 mmol, 2.0 equiv.), Cs<sub>2</sub>CO<sub>3</sub> (197 mg, 0.6 mmol, 3.0 equiv.), **PTH1** (4.0 mg, 0.020 mmol, 10 mol%) and CH<sub>3</sub>CN (2 mL). The mixture was irradiated with a 400 nm LED light without air flow supply for 24 h. Purification by flash chromatography on silica gel (EtOAc/hexane, 1 : 15 v/v) afforded product **9** (26 mg, 55%) as a colorless oil.

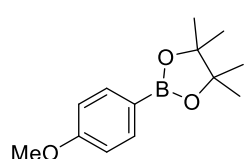

<sup>1</sup>H NMR (500 MHz, CDCl<sub>3</sub>): 7.77 (2 H, d, *J* = 8.6 Hz), 6.90 (2 H, d, *J* = 8.6 Hz), 3.83 (3 H, s), 1.34 (12 H, s) ppm. – <sup>13</sup>C NMR (125 MHz, CDCl<sub>3</sub>): 162.3, 136.6, 113.4, 83.6, 55.2, 25.0 ppm. – <sup>11</sup>B NMR (160.4 Hz, CDCl<sub>3</sub>): 31.0 ppm. – IR: 2983, 1736, 1605, 1446, 1395, 1372, 1360, 1235, 1144, 1091, 1044 cm<sup>-1</sup>.

31.0 ppm. – IR: 2983, 1736, 1605, 1446, 1395, 1372, 1360, 1235, 1144, 1091, 1044 cm<sup>-1</sup>.

### 2-(Benzo[*d*][1,3]dioxol-5-yl)-4,4,5,5-tetramethyl-1,3,2-dioxaborolane (**10**)<sup>[18]</sup>

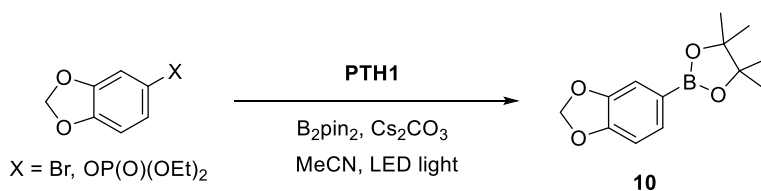



**From 5-bromobenzo[*d*][1,3]dioxole:** The general procedure GP1 was followed with 5-bromobenzo[*d*][1,3]dioxole (40 mg, 0.2 mmol), B<sub>2</sub>pin<sub>2</sub> (101 mg, 0.4 mmol, 2.0 equiv.), Cs<sub>2</sub>CO<sub>3</sub> (132 mg, 0.4 mmol, 2.0 equiv.), **PTH1** (0.4 mg, 0.002 mmol, 1 mol%) and CH<sub>3</sub>CN (2 mL). The mixture was irradiated with a 400 nm LED light for 48 h. Purification by flash chromatography on silica gel (EtOAc/hexane, 1 : 15 v/v) afford product **10** (40 mg, 80%) as a colorless solid.

**From benzo[*d*][1,3]dioxol-5-yl diethyl phosphate:** The general procedure GP1 was followed with benzo[*d*][1,3]dioxol-5-yl diethyl phosphate (55 mg, 0.2 mmol), B<sub>2</sub>pin<sub>2</sub> (152 mg, 0.6 mmol, 3.0 equiv.), Cs<sub>2</sub>CO<sub>3</sub> (197 mg, 0.6 mmol, 3.0 equiv.), **PTH1** (4.8 mg, 0.024 mmol, 12 mol%) and CH<sub>3</sub>CN (2 mL). The mixture was irradiated with a 400 nm LED light without air flow supply for 36 h. Purification by flash chromatography on silica gel (EtOAc/hexane, 1 : 19 v/v) afforded product **10** (36 mg, 83%) as a colorless solid.

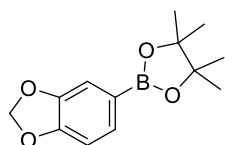

M.p.: 41–43 °C. – <sup>1</sup>H NMR (500 MHz, CDCl<sub>3</sub>): 7.36 (1 H, d, *J* = 7.7 Hz), 7.24 (1 H, s), 6.83 (1 H, d, *J* = 7.7 Hz), 5.95 (2 H, s), 1.33 (12 H, s) ppm. – <sup>13</sup>C NMR (125 MHz, CDCl<sub>3</sub>): 150.3, 147.3, 129.9, 114.1, 108.4, 100.8, 83.8, 25.0 ppm. – <sup>11</sup>B NMR (160.4 Hz, CDCl<sub>3</sub>): 30.6 ppm. – IR: 2980, 1710, 1435, 1354, 1236, 1219, 1144, 1091, 1057, 1037, 963 cm<sup>-1</sup>.

### 2-(4-(2-(4-Methoxyphenyl)propan-2-yl)phenyl)-4,4,5,5-tetramethyl-1,3,2-dioxaborolane (**11**)

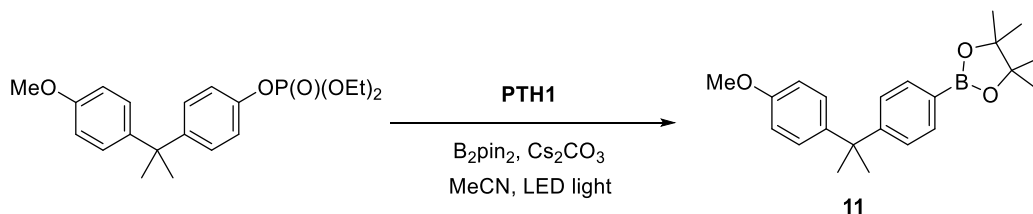

The general procedure GP1 was followed with diethyl (4-(2-(4-methoxyphenyl)propan-2-yl)phenyl) phosphate (76 mg, 0.2 mmol), B<sub>2</sub>pin<sub>2</sub> (152 mg, 0.6 mmol, 3.0 equiv.), Cs<sub>2</sub>CO<sub>3</sub>

(197 mg, 0.6 mmol, 3.0 equiv.), **PTH1** (4.0 mg, 0.02 mmol, 10 mol%) and CH<sub>3</sub>CN (2 mL). The mixture was irradiated with a 400 nm LED light without air flow supply for 72 h. Purification by flash chromatography on silica gel (EtOAc/hexane, 1 : 19 v/v) afforded **11** (36 mg, 52%) as a colorless solid.

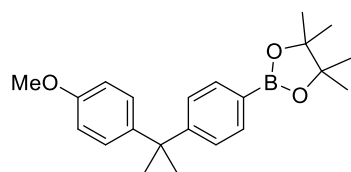

M.p.: 88–90 °C. – <sup>1</sup>H NMR (500 MHz, CDCl<sub>3</sub>): 7.75 (2 H, d, *J* = 8.2 Hz), 7.27 (2 H, d, *J* = 8.3 Hz), 7.15 (2 H, d, *J* = 8.8 Hz), 6.82 (2 H, d, *J* = 8.8 Hz), 3.79 (3 H, s), 1.68 (6 H, s), 1.35 (12 H, s) ppm. – <sup>13</sup>C NMR (125 MHz, CDCl<sub>3</sub>): 157.6, 154.4, 142.8, 134.7, 127.9, 126.3, 113.4, 83.8, 55.3, 42.7, 30.9, 25.0 ppm. – <sup>11</sup>B NMR (160.4 Hz, CDCl<sub>3</sub>): 30.9 ppm. – IR: 1609, 1511, 1464, 1397, 1361, 1320, 1258, 1181, 1143, 1117, 1094, 1034, 1020 cm<sup>-1</sup>. – HRMS: calcd for C<sub>22</sub>H<sub>30</sub>BO<sub>3</sub>: 353.2283, found 353.2284 [M+H<sup>+</sup>].

### 2-(3-Fluorophenyl)-4,4,5,5-tetramethyl-1,3,2-dioxaborolane (**12**)<sup>[19]</sup>

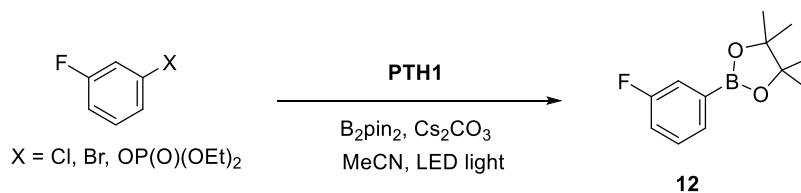

**From 1-fluoro-3-bromobenzene:** The general procedure GP1 was followed with 1-fluoro-3-bromobenzene (35 mg, 0.2 mmol), B<sub>2</sub>pin<sub>2</sub> (101 mg, 0.4 mmol, 2.0 equiv.), Cs<sub>2</sub>CO<sub>3</sub> (132 mg, 0.4 mmol, 2.0 equiv.), **PTH1** (0.8 mg, 0.004 mmol, 2 mol%) and CH<sub>3</sub>CN (2 mL). The mixture was irradiated with a 400 nm LED light for 48 h. Purification by flash chromatography on silica gel (EtOAc/hexane, 1 : 19 v/v) afford product **12** (44 mg, 99%) as a colorless oil.

**From 1-fluoro-3-chlorobenzene:** The general procedure GP1 was followed with 1-fluoro-3-bromobenzene (35 mg, 0.2 mmol), B<sub>2</sub>pin<sub>2</sub> (101 mg, 0.4 mmol, 2.0 equiv.), Cs<sub>2</sub>CO<sub>3</sub> (132 mg, 0.4 mmol, 2.0 equiv.), **PTH1** (2.0 mg, 0.1 mmol, 5 mol%) and CH<sub>3</sub>CN (2 mL). The mixture was irradiated with a 400 nm LED light without air flow supply for 72 h.

Purification by flash chromatography on silica gel (EtOAc/hexane, 1 : 19 v/v) afford product **12** (26 mg, 60%) as a colorless oil.

**From diethyl (3-fluorophenyl) phosphate:** The general procedure GP1 was followed with diethyl (3-fluorophenyl) phosphate (50 mg, 0.2 mmol), B<sub>2</sub>pin<sub>2</sub> (152 mg, 0.6 mmol, 3.0 equiv.), Cs<sub>2</sub>CO<sub>3</sub> (197 mg, 0.6 mmol, 3.0 equiv.), **PTH1** (4.0 mg, 0.02 mmol, 10 mol%) and CH<sub>3</sub>CN (2 mL). The mixture was irradiated with a 420 nm LED light without air flow supply for 48 h. Purification by flash chromatography on silica gel (EtOAc/hexane, 1 : 19 v/v) afforded product **12** (23 mg, 52%) as a colorless oil.

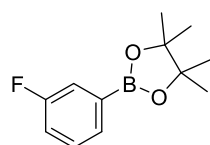

<sup>1</sup>H NMR (500 MHz, CDCl<sub>3</sub>): 7.58 (1 H, d, *J* = 7.3 Hz), 7.49 (1 H, dd, *J* = 9.2, 2.5 Hz), 7.34 (1 H, td, *J* = 7.8, 5.5 Hz), 7.22–7.11 (1 H, m), 1.35 (12 H, s) ppm. – <sup>13</sup>C NMR (125 MHz, CDCl<sub>3</sub>): 162.6 (d, *J* = 246.6 Hz), 130.4 (d, *J* = 3.2 Hz), 129.6 (d, *J* = 7.2 Hz), 121.1 (d, *J* = 19.2 Hz), 118.3 (d, *J* = 21.0 Hz), 84.2, 25.0 ppm. – <sup>11</sup>B NMR (160.4 Hz, CDCl<sub>3</sub>): 30.6 ppm. – <sup>19</sup>F NMR (470.5 Hz, CDCl<sub>3</sub>): –114.2 (td, *J* = 9.1, 5.6 Hz) ppm. – IR: 2979, 1580, 1488, 1430, 1380, 1372, 1353, 1324, 1298, 1262, 1206, 1143, 1112, 1091, 1061, 964 cm<sup>-1</sup>.

### 2-(3-Fluoro-4-methylphenyl)-4,4,5,5-tetramethyl-1,3,2-dioxaborolane (**13**)<sup>[20]</sup>

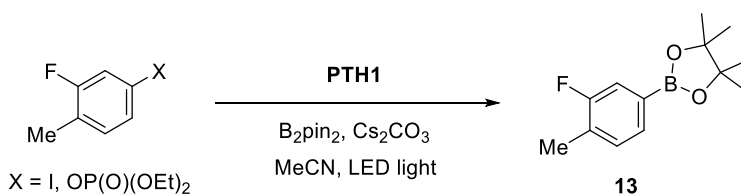

**From 2-fluoro-4-iodo-1-methylbenzene:** The general procedure GP1 was followed with 2-fluoro-4-iodo-1-methylbenzene (47 mg, 0.2 mmol), B<sub>2</sub>pin<sub>2</sub> (101 mg, 0.4 mmol, 2.0 equiv.), Cs<sub>2</sub>CO<sub>3</sub> (132 mg, 0.4 mmol, 2.0 equiv.), **PTH1** (0.08 mg, 0.0004 mmol, 0.2 mol%) and CH<sub>3</sub>CN (2 mL). The mixture was irradiated with a 400 nm LED light for 48 h. Purification by flash chromatography on silica gel (EtOAc/hexane, 1 : 19 v/v) afford product **13** (39 mg, 83%) as a colorless oil.

**From diethyl (3-fluoro-4-methylphenyl) phosphate:** The general procedure GP1 was followed with diethyl (3-fluoro-4-methylphenyl) phosphate (52 mg, 0.2 mmol), B<sub>2</sub>pin<sub>2</sub> (152 mg, 0.6 mmol, 3.0 equiv.), Cs<sub>2</sub>CO<sub>3</sub> (197 mg, 0.6 mmol, 3.0 equiv.), **PTH1** (4.0 mg, 0.02 mmol, 10 mol%) and CH<sub>3</sub>CN (2 mL). The mixture was irradiated with a 420 nm LED light without air flow supply for 48 h. Purification by flash chromatography on silica gel (EtOAc/hexane, 1 : 19 v/v) afforded product **13** (23.5 mg, 50%) as a colorless oil.

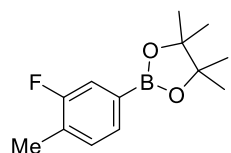

<sup>1</sup>H NMR (500 MHz, CDCl<sub>3</sub>): 7.46 (1 H, d, *J* = 7.4 Hz), 7.41 (1 H, d, *J* = 10.1 Hz), 7.18 (1 H, t, *J* = 7.4 Hz), 2.29 (3 H, s), 1.34 (12 H, s) ppm. – <sup>13</sup>C NMR (125 MHz, CDCl<sub>3</sub>): 161.3 (d, *J* = 245.2 Hz), 131.2 (d, *J* = 4.5 Hz), 130.3 (d, *J* = 3.6 Hz), 128.4 (d, *J* = 17.2 Hz), 120.8 (d, *J* = 20.5 Hz), 84.1, 25.0, 14.9 (d, *J* = 3.7 Hz) ppm. – <sup>11</sup>B NMR (160.4 Hz, CDCl<sub>3</sub>): 30.6 ppm. – <sup>19</sup>F NMR (470.5 Hz, CDCl<sub>3</sub>): -119.1 ppm. – IR: 2978, 2929, 1624, 1566, 1511, 1406, 1351, 1319, 1286, 1266, 1217, 1143, 1129, 1076 cm<sup>-1</sup>.

***N*-(3-(4,4,5,5-Tetramethyl-1,3,2-dioxaborolan-2-yl)phenyl)acetamide (**14**)**<sup>[21]</sup>

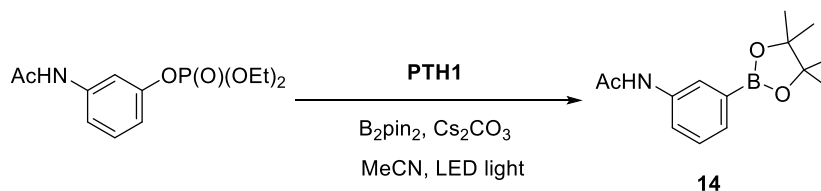

The general procedure GP1 was followed with 3-acetamidophenyl diethyl phosphate (58 mg, 0.2 mmol), B<sub>2</sub>pin<sub>2</sub> (152 mg, 0.6 mmol, 3.0 equiv.), Cs<sub>2</sub>CO<sub>3</sub> (197 mg, 0.6 mmol, 3.0 equiv.), **PTH1** (4.0 mg, 0.02 mmol, 10 mol%) and CH<sub>3</sub>CN (2 mL). The mixture was irradiated with a 400 nm LED light without air flow supply for 48 h. Purification by flash chromatography on silica gel (EtOAc/hexane, 2 : 3 v/v) afforded product **14** (31 mg, 60%) as a colorless solid.

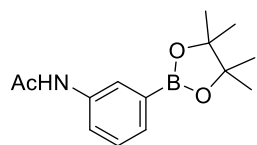

M.p.: 186–187 °C. – <sup>1</sup>H NMR (500 MHz, CDCl<sub>3</sub>): 7.85 (1 H, d, *J* = 7.8 Hz), 7.65 (1 H, s), 7.53 (1 H, d, *J* = 7.3 Hz), 7.43 (1 H, s), 7.33 (1 H, t, *J* = 7.7 Hz), 2.15 (3 H, s), 1.32 (12 H, s) ppm. – <sup>13</sup>C NMR (125 MHz, CDCl<sub>3</sub>):

168.6, 137.5, 130.7, 128.7, 126.0, 123.3, 84.0, 25.0, 24.6 ppm. –  $^{11}\text{B}$  NMR (160.4 Hz,  $\text{CDCl}_3$ ): 30.5 ppm. – IR: 2980, 1723, 1625, 1572, 1521, 1399, 1367, 1318, 1269, 1221, 1160, 1144, 1107, 1096, 1021  $\text{cm}^{-1}$ .

***tert*-Butyl (4-(4,4,5,5-tetramethyl-1,3,2-dioxaborolan-2-yl)phenyl)carbamate (15)** <sup>[22]</sup>

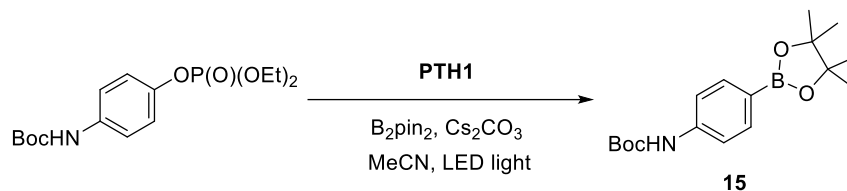

The general procedure GP1 was followed with 3-acetamidophenyl diethyl phosphate (69 mg, 0.2 mmol), B<sub>2</sub>pin<sub>2</sub> (152 mg, 0.6 mmol, 3.0 equiv.), Cs<sub>2</sub>CO<sub>3</sub> (197 mg, 0.6 mmol, 3.0 equiv.), **PTH1** (4.0 mg, 0.02 mmol, 10 mol%) and CH<sub>3</sub>CN (2 mL). The mixture was irradiated with a 400 nm LED light without air flow supply for 48 h. Purification by flash chromatography on silica gel (EtOAc/hexane, 1 : 4 v/v) afforded product **15** (47 mg, 73%) as a colorless solid.

**With 2 equiv. of B<sub>2</sub>pin<sub>2</sub>:** The general procedure GP1 was followed with 3-acetamidophenyl diethyl phosphate (69 mg, 0.2 mmol), B<sub>2</sub>pin<sub>2</sub> (101 mg, 0.4 mmol, 2.0 equiv.), Cs<sub>2</sub>CO<sub>3</sub> (197 mg, 0.6 mmol, 3.0 equiv.), **PTH1** (4.0 mg, 0.02 mmol, 10 mol%) and CH<sub>3</sub>CN (2 mL). The mixture was irradiated with a 400 nm LED light without air flow supply for 40 h. Purification by flash chromatography on silica gel (EtOAc/hexane, 1 : 4 v/v) afforded product **15** (38 mg, 60%) as a colorless solid.

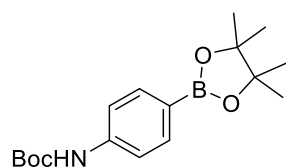

M.p.: 135–137 °C. –  $^1\text{H}$  NMR (500 MHz,  $\text{CDCl}_3$ ): 7.73 (2 H, d,  $J$  = 8.5 Hz), 7.36 (2 H, d,  $J$  = 8.1 Hz), 6.59 (1 H, s), 1.51 (9 H, s), 1.33 (12 H, s) ppm. –  $^{13}\text{C}$  NMR (125 MHz,  $\text{CDCl}_3$ ): 152.6, 141.2, 136.0, 117.3, 83.8, 80.8, 28.4, 25.0 ppm. –  $^{11}\text{B}$  NMR (160.4 Hz,  $\text{CDCl}_3$ ): 31.0 ppm. – IR: 3344, 2977, 1698, 1610, 1587, 1509, 1397, 1357, 1314, 1232, 1139, 1091, 1016, 962  $\text{cm}^{-1}$ .

**4-(4,4,5,5-Tetramethyl-1,3,2-dioxaborolan-2-yl)benzonitrile (16)**<sup>[15]</sup>

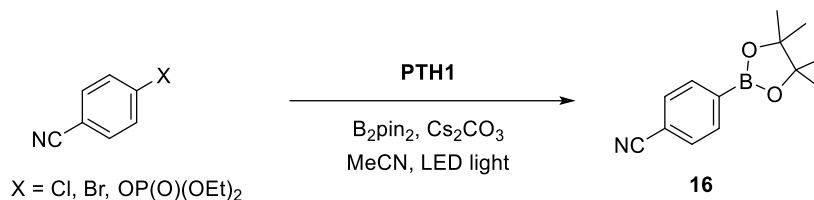

**From 4-bromobenzonitrile:** The general procedure GP1 was followed with 4-bromobenzonitrile (36 mg, 0.2 mmol), B<sub>2</sub>pin<sub>2</sub> (101 mg, 0.4 mmol, 2.0 equiv.), Cs<sub>2</sub>CO<sub>3</sub> (132 mg, 0.4 mmol, 2.0 equiv.), **PTH1** (0.4 mg, 0.008 mmol, 1 mol%) and CH<sub>3</sub>CN (2 mL). The mixture was irradiated with a 400 nm LED light for 48 h. Purification by flash chromatography on silica gel (EtOAc/hexane, 1 : 15 v/v) afford product **16** (38 mg, 83%) as a colorless solid.

**Gram scale from 4-chlorobenzonitrile:** According to general procedure GP1 two identical reactions were run with 4-chlorobenzonitrile (550 mg, 4 mmol), B<sub>2</sub>pin<sub>2</sub> (2.0 g, 8.0 mmol, 2.0 equiv.), Cs<sub>2</sub>CO<sub>3</sub> (2.6 g, 8.0 mmol, 2.0 equiv.), **PTH1** (15.9 mg, 0.08 mmol, 2 mol%) and CH<sub>3</sub>CN (40 mL). The mixture was irradiated with a 400 nm LED light for 48 h. Purification by flash chromatography on silica gel (EtOAc/hexane, 1 : 15 v/v) afford product **16** (1.2 g, 66%) as a colorless solid.

**From 4-cyanophenyl diethyl phosphate:** The general procedure GP1 was followed with 4-cyanophenyl diethyl phosphate (51 mg, 0.2 mmol), B<sub>2</sub>pin<sub>2</sub> (152 mg, 0.6 mmol, 3.0 equiv.), Cs<sub>2</sub>CO<sub>3</sub> (197 mg, 0.6 mmol, 3.0 equiv.), **PTH1** (0.8 mg, 0.004 mmol, 2 mol%) and CH<sub>3</sub>CN (2 mL). The mixture was irradiated with a 450 nm LED light without air flow supply for 36 h. Purification by flash chromatography on silica gel (EtOAc/hexane, 1 : 15 v/v) afforded product **16** (31 mg, 68%) as a colorless solid.

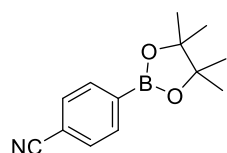

M.p.: 96–98 °C. – <sup>1</sup>H NMR (500 MHz, CDCl<sub>3</sub>): 7.88 (2 H, d, *J* = 8.1 Hz), 7.64 (2 H, d, *J* = 8.2 Hz), 1.35 (12 H, s) ppm. – <sup>13</sup>C NMR (125 MHz, CDCl<sub>3</sub>): 135.2, 131.3, 119.0, 114.7, 84.6, 25.0 ppm. – <sup>11</sup>B NMR (160.4 Hz, CDCl<sub>3</sub>):

30.4 ppm. – IR: 2969, 1612, 1487, 1432, 1364, 1323, 1256, 1220, 1149, 1105, 1089, 968 cm<sup>-1</sup>.

### 1,4-Bis(4,4,5,5-tetramethyl-1,3,2-dioxaborolan-2-yl)benzene (17)<sup>[15]</sup>

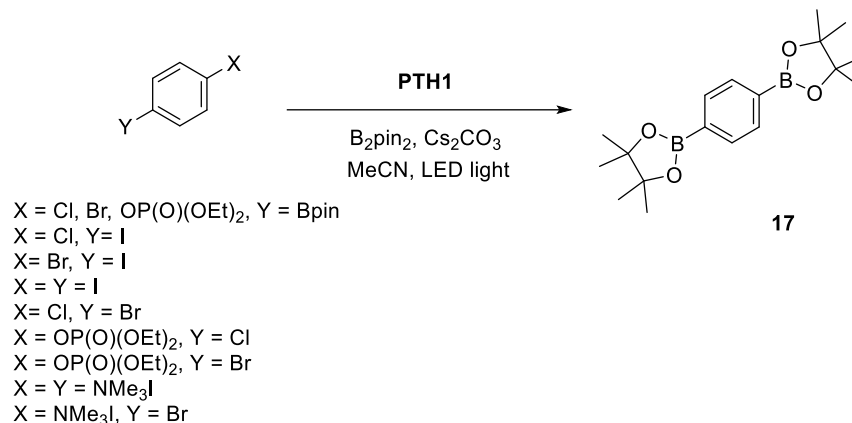

**From 2-(4-bromophenyl)-4,4,5,5-tetramethyl-1,3,2-dioxaborolane:** The general procedure GP1 was followed with 2-(4-bromophenyl)-4,4,5,5-tetramethyl-1,3,2-dioxaborolane (56 mg, 0.2 mmol), B<sub>2</sub>pin<sub>2</sub> (101 mg, 0.4 mmol, 2.0 equiv.), Cs<sub>2</sub>CO<sub>3</sub> (132 mg, 0.4 mmol, 2.0 equiv.), **PTH1** (0.8 mg, 0.004 mmol, 2 mol%) and CH<sub>3</sub>CN (2 mL). The mixture was irradiated with a 400 nm LED light for 48 h. Purification by Kugelrohr distillation (150 °C, 2 h) according to GP5 afforded boronic ester **17** (61 mg, 92%) as a colorless solid.

**From 2-(4-chlorophenyl)-4,4,5,5-tetramethyl-1,3,2-dioxaborolane:** The general procedure GP1 was followed with 2-(4-chlorophenyl)-4,4,5,5-tetramethyl-1,3,2-dioxaborolane (48 mg, 0.2 mmol), B<sub>2</sub>pin<sub>2</sub> (101 mg, 0.4 mmol, 2.0 equiv.), Cs<sub>2</sub>CO<sub>3</sub> (132 mg, 0.4 mmol, 2.0 equiv.), **PTH1** (0.8 mg, 0.004 mmol, 2 mol%) and CH<sub>3</sub>CN (2 mL). The mixture was irradiated with a 400 nm LED light for 48 h. Purification by Kugelrohr distillation (150 °C, 2 h) according to GP5 afforded boronic ester **17** (49 mg, 74%) as a colorless solid.

**From diethyl (4-(4,4,5,5-tetramethyl-1,3,2-dioxaborolan-2-yl)phenyl) phosphate:** The general procedure GP1 was followed with diethyl (4-(4,4,5,5-tetramethyl-1,3,2-dioxaborolan-2-yl)phenyl) phosphate (71 mg, 0.2 mmol), B<sub>2</sub>pin<sub>2</sub> (152 mg, 0.6 mmol, 3.0

equiv.), Cs<sub>2</sub>CO<sub>3</sub> (197 mg, 0.6 mmol, 3.0 equiv.), **PTH1** (4.0 mg, 0.02 mmol, 10 mol%) and CH<sub>3</sub>CN (2 mL). The mixture was irradiated with a 400 nm LED light without air flow supply for 48 h. Purification by Kugelrohr distillation (150 °C, 2 h) according to GP5 afforded boronic ester **17** (52 mg, 79%) as a colorless solid.

**Gram scale from diethyl (4-(4,4,5,5-tetramethyl-1,3,2-dioxaborolan-2-yl)phenyl) phosphate:** According to general procedure GP1 two identical reactions were run with diethyl (4-(4,4,5,5-tetramethyl-1,3,2-dioxaborolan-2-yl)phenyl) phosphate (1.42 g, 4 mmol), B<sub>2</sub>pin<sub>2</sub> (3.05 g, 12.0 mmol, 3.0 equiv.), Cs<sub>2</sub>CO<sub>3</sub> (3.95 g, 12.0 mmol, 3.0 equiv.), **PTH1** (79.7 mg, 0.4 mmol, 10 mol%) and CH<sub>3</sub>CN (2 mL). The mixture was irradiated with a 400 nm LED light without air flow supply for 48 h. Purification by Kugelrohr distillation (150 °C, 3h) according to GP5 afforded boronic ester **17** (1.6 mg, 61%) as a colorless solid.

**From 1,4-diiodobenzene:** The general procedure GP1 was followed with 1,4-diiodobenzene (66 mg, 0.2 mmol), B<sub>2</sub>pin<sub>2</sub> (152 mg, 0.6 mmol, 3.0 equiv.), B<sub>2</sub>pin<sub>2</sub> (203 mg, 0.8 mmol, 4.0 equiv.), Cs<sub>2</sub>CO<sub>3</sub> (263 mg, 0.8 mmol, 4.0 equiv.), **PTH1** (0.4 mg, 0.002 mmol, 1 mol%) and CH<sub>3</sub>CN (4 mL). The mixture was irradiated with a 400 nm LED light for 48 h. Purification by Kugelrohr distillation (150 °C, 2 h) according to GP5 afforded boronic ester **17** (64 mg, 97%) as a colorless solid.

**From 1-bromo-4-iodobenzene:** The general procedure GP1 was followed with 1-bromo-4-iodobenzene (56 mg, 0.2 mmol), B<sub>2</sub>pin<sub>2</sub> (203 mg, 0.8 mmol, 4.0 equiv.), Cs<sub>2</sub>CO<sub>3</sub> (263 mg, 0.8 mmol, 4.0 equiv.), **PTH1** (0.4 mg, 0.002 mmol, 1 mol%) and CH<sub>3</sub>CN (4 mL). The mixture was irradiated with a 400 nm LED light for 48 h. Purification by Kugelrohr distillation (150 °C, 2 h) according to GP5 afforded boronic ester **17** (47 mg, 71%) as a colorless solid.

**From 1-chloro-4-iodobenzene:** The general procedure GP1 was followed with 1-chloro-4-iodobenzene (48 mg, 0.2 mmol), B<sub>2</sub>pin<sub>2</sub> (203 mg, 0.8 mmol, 4.0 equiv.), Cs<sub>2</sub>CO<sub>3</sub> (263 mg, 0.8 mmol, 4.0 equiv.), **PTH1** (0.8 mg, 0.004 mmol, 2 mol%) and CH<sub>3</sub>CN (4 mL). The mixture was irradiated with a 400 nm LED light for 48 h. Purification by Kugelrohr



distillation (150 °C, 2 h) according to GP5 afforded boronic ester **17** (53 mg, 80%) as a colorless solid.

**From 1-bromo-4-chlorobenzene:** The general procedure GP1 was followed with 1-bromo-4-chlorobenzene (38 mg, 0.2 mmol), B<sub>2</sub>pin<sub>2</sub> (203 mg, 0.8 mmol, 4.0 equiv.), Cs<sub>2</sub>CO<sub>3</sub> (263 mg, 0.8 mmol, 4.0 equiv.), **PTH1** (0.8 mg, 0.004 mmol, 2 mol%) and CH<sub>3</sub>CN (4 mL). The mixture was irradiated with a 400 nm LED light for 48 h. Purification by Kugelrohr distillation (150 °C, 2 h) according to GP5 afforded boronic ester **17** (41 mg, 62%) as a colorless solid.

**From 4-bromophenyl diethyl phosphate:** The general procedure GP1 was followed with 4-bromophenyl diethyl phosphate (62 mg, 0.2 mmol), B<sub>2</sub>pin<sub>2</sub> (254 mg, 1.0 mmol, 5.0 equiv.), Cs<sub>2</sub>CO<sub>3</sub> (263 mg, 0.8 mmol, 4.0 equiv.), **PTH1** (0.8 mg, 0.004 mmol, 2 mol%) and CH<sub>3</sub>CN (4.5 mL). The mixture was irradiated with a 400 nm LED light for 48 h. Purification by Kugelrohr distillation (150 °C, 2.5 h) according to GP5 afforded boronic ester **17** (56 mg, 85%) as a colorless solid.

**From 4-chlorophenyl diethyl phosphate:** The general procedure GP1 was followed with 4-chlorophenyl diethyl phosphate (53 mg, 0.2 mmol), B<sub>2</sub>pin<sub>2</sub> (254 mg, 1.0 mmol, 5.0 equiv.), Cs<sub>2</sub>CO<sub>3</sub> (329 mg, 1.0 mmol, 5.0 equiv.), **PTH1** (0.8 mg, 0.004 mmol, 2 mol%) and CH<sub>3</sub>CN (4.5 mL). The mixture was irradiated with a 400 nm LED light for 48 h. Purification by Kugelrohr distillation (150 °C, 2.5 h) according to GP5 afforded boronic ester **17** (46 mg, 70%) as a colorless solid.

**From 4-bromo-*N,N,N*-trimethylbenzenaminium iodide:** The general procedure GP1 was followed with 4-bromo-*N,N,N*-trimethylbenzenaminium iodide (68 mg, 0.2 mmol), B<sub>2</sub>pin<sub>2</sub> (254 mg, 1.0 mmol, 5.0 equiv.), Cs<sub>2</sub>CO<sub>3</sub> (329 mg, 1.0 mmol, 5.0 equiv.), **PTH1** (2.4 mg, 0.012 mmol, 6 mol%) and CH<sub>3</sub>CN (4.5 mL). The mixture was irradiated with a 400 nm LED light for 48 h. Purification by Kugelrohr distillation (150 °C, 2 h) according to GP5 afforded boronic ester **17** (58 mg, 88%) as a colorless solid.

**From  $N^1,N^1,N^1,N^4,N^4,N^4$ -hexamethylbenzene-1,4-diaminium iodide:** The general procedure GP1 was followed with  $N^1,N^1,N^1,N^4,N^4,N^4$ -hexamethylbenzene-1,4-diaminium iodide (90 mg, 0.2 mmol),  $B_2pin_2$  (203 mg, 0.8 mmol, 4.0 equiv.),  $Cs_2CO_3$  (263 mg, 0.8 mmol, 4.0 equiv.), **PTH1** (2.0 mg, 0.01 mmol, 5 mol%) and  $CH_3CN$  (4.5 mL). The mixture was irradiated with a 400 nm LED light for 24 h. Purification by Kugelrohr distillation (150 °C, 2.5 h) according to GP5 afforded boronic ester **17** (47 mg, 71%) as a colorless solid.

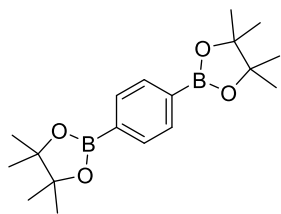

M.p.: > 220 °C. –  $^1H$  NMR (500 MHz,  $CDCl_3$ ): 7.80 (4 H, s), 1.35 (24 H, s) ppm. –  $^{13}C$  NMR (125 MHz,  $CDCl_3$ ): 134.0, 84.0, 25.0 ppm. –  $^{11}B$  NMR (160.4 Hz,  $CDCl_3$ ): 31.0 ppm. – IR: 2981, 1732, 1521, 1393, 1372, 1347, 1322, 1237, 1141, 1099, 1044, 1019  $cm^{-1}$ .

#### Ethyl 4-(4,4,5,5-tetramethyl-1,3,2-dioxaborolan-2-yl)benzoate (**18**)<sup>[15]</sup>

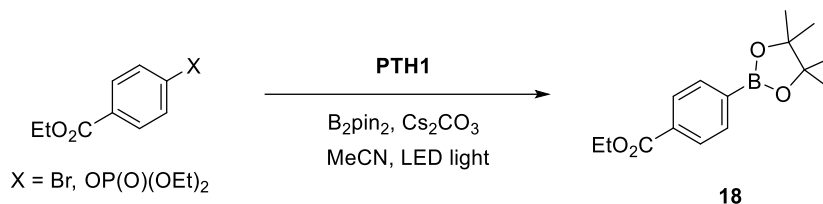

**From ethyl 4-bromobenzoate:** The general procedure GP1 was followed with ethyl 4-bromobenzoate (45 mg, 0.2 mmol),  $B_2pin_2$  (101 mg, 0.4 mmol, 2.0 equiv.),  $Cs_2CO_3$  (132 mg, 0.4 mmol, 2.0 equiv.), **PTH1** (0.4 mg, 0.002 mmol, 1 mol%) and  $CH_3CN$  (2 mL). The mixture was irradiated with a 400 nm LED light for 48 h. Purification by flash chromatography on silica gel (EtOAc/hexane, 1 : 15 v/v) afford product **18** (45 mg, 82%) as a colorless solid.

**From ethyl 4-((diethoxyphosphoryl)oxy)benzoate:** The general procedure GP1 was followed with ethyl 4-((diethoxyphosphoryl)oxy)benzoate (60 mg, 0.2 mmol),  $B_2pin_2$  (152 mg, 0.6 mmol, 3.0 equiv.),  $Cs_2CO_3$  (197 mg, 0.6 mmol, 3.0 equiv.), **PTH1** (2.0 mg, 0.01 mmol, 5 mol%) and  $CH_3CN$  (2 mL). The mixture was irradiated with a 400 nm LED light

without air flow supply for 48 h. Purification by flash chromatography on silica gel (EtOAc/hexane, 1 : 19 v/v) afforded product **18** (31 mg, 56%) as a colorless solid.

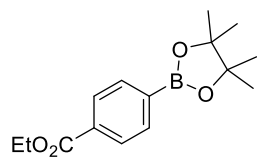

M.p.: 78–80 °C. – <sup>1</sup>H NMR (500 MHz, CDCl<sub>3</sub>): 8.02 (2 H, d, *J* = 8.3 Hz), 7.86 (2 H, d, *J* = 8.2 Hz), 4.38 (2 H, q, *J* = 7.1 Hz), 1.40 (3 H, t, *J* = 7.1 Hz), 1.35 (12 H, s) ppm. – <sup>13</sup>C NMR (125 MHz, CDCl<sub>3</sub>): 166.8, 134.8, 132.8, 128.7, 84.3, 61.2, 25.0, 14.5 ppm. – <sup>11</sup>B NMR (160.4 Hz, CDCl<sub>3</sub>): 31.0 ppm. – IR: 2979, 1713, 1614, 1561, 1508, 1398, 1357, 1308, 1266, 1218, 1167, 1143, 1107, 1096, 1021, 962 cm<sup>-1</sup>.

### Methyl 2-(3-(trifluoro-λ<sup>4</sup>-boraneyl)phenyl)acetate, potassium salt (**19**)

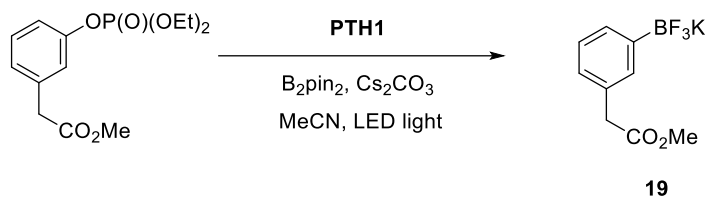

The general procedure GP1 was followed with methyl 2-(3-((diethoxyphosphoryl)oxy)phenyl)acetate (60 mg, 0.2 mmol), B<sub>2</sub>pin<sub>2</sub> (152 mg, 0.6 mmol, 3.0 equiv.), Cs<sub>2</sub>CO<sub>3</sub> (197 mg, 0.6 mmol, 3.0 equiv.), **PTH1** (4.0 mg, 0.02 mmol, 10 mol%) and CH<sub>3</sub>CN (2 mL). The mixture was irradiated with a 400 nm LED light without air flow supply for 72 h. Purification by treatment with methylboronic acid and then KHF<sub>2</sub> according to GP4 afforded organotrifluoroborate salt **19** (41 mg, 81%) as a colorless solid.

**With 1.5 equiv. of B<sub>2</sub>pin<sub>2</sub>:** The general procedure GP1 was followed with methyl 2-(3-((diethoxyphosphoryl)oxy)phenyl)acetate (60 mg, 0.2 mmol), B<sub>2</sub>pin<sub>2</sub> (76 mg, 0.3 mmol, 1.5 equiv.), Cs<sub>2</sub>CO<sub>3</sub> (197 mg, 0.6 mmol, 3.0 equiv.), **PTH1** (4.0 mg, 0.02 mmol, 10 mol%) and CH<sub>3</sub>CN (2 mL). The mixture was irradiated with a 400 nm LED light without air flow supply for 72 h. Purification by treatment with methylboronic acid and then KHF<sub>2</sub> according to GP4 afforded organotrifluoroborate salt **19** (29 mg, 56%) as a colorless solid.

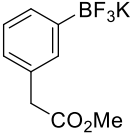
 M.p.: > 200 °C. – <sup>1</sup>H NMR (500 MHz, CD<sub>3</sub>CN): 7.34 (1 H, d, *J* = 7.3 Hz), 7.32 (1 H, s), 7.14 (1 H, t, *J* = 7.4 Hz), 7.02 (1 H, d, *J* = 7.5 Hz), 3.63 (3 H, s), 3.57 (2 H, s) ppm. – <sup>13</sup>C NMR (125 MHz, CD<sub>3</sub>CN): 173.6, 133.34, 133.29, 130.9, 127.7, 127.4, 52.2, 41.8 ppm. – <sup>11</sup>B NMR (160.4 Hz, CD<sub>3</sub>CN): 3.6 ppm. – <sup>19</sup>F NMR (470.5 Hz, CD<sub>3</sub>CN): –142.2 ppm. – IR: 2132, 1720, 1636, 1434, 1329, 1239, 1181, 1158, 1141, 1098, 1022, 998, 947 cm<sup>-1</sup>. – HRMS: calcd for C<sub>9</sub>H<sub>9</sub>BF<sub>3</sub>O<sub>2</sub>: 217.0653, found 217.0653 [M–K<sup>+</sup>].

### Methyl 3-(2-(4,4,5,5-tetramethyl-1,3,2-dioxaborolan-2-yl)phenyl)propanoate (**20**)

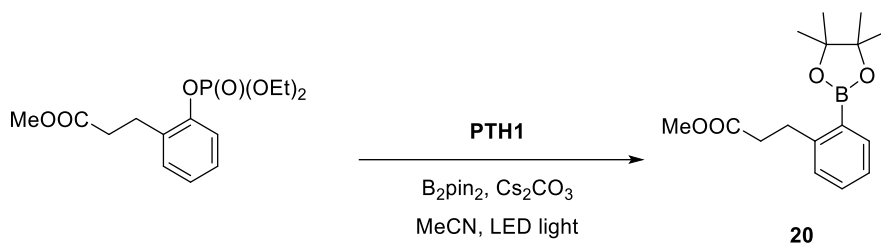

The general procedure GP1 was followed with methyl 3-(2-((diethoxyphosphoryl)oxy)phenyl)propanoate (63 mg, 0.2 mmol), B<sub>2</sub>pin<sub>2</sub> (152 mg, 0.6 mmol, 3.0 equiv.), Cs<sub>2</sub>CO<sub>3</sub> (197 mg, 0.6 mmol, 3.0 equiv.), **PTH1** (4.0 mg, 0.02 mmol, 10 mol%) and CH<sub>3</sub>CN (2 mL). The mixture was irradiated with a 400 nm LED light without air flow supply for 72 h. Purification by flash chromatography on silica gel (EtOAc/hexane, 1 : 14 v/v) afford product **20** (41 mg, 70%) as a colorless liquid.

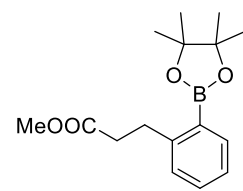
<sup>1</sup>H NMR (500 MHz, CDCl<sub>3</sub>): 7.79 (1 H, d, *J* = 7.9 Hz), 7.35 (1 H, t, *J* = 6.8 Hz), 7.24–7.16 (2 H, m), 3.67 (3 H, s), 3.23–3.12 (2 H, m), 2.63–2.54 (2 H, m), 1.34 (12 H, s) ppm. – <sup>13</sup>C NMR (125 MHz, CDCl<sub>3</sub>): 173.9, 147.7, 136.4, 131.2, 129.4, 125.7, 83.7, 51.6, 37.2, 31.3, 25.0 ppm. – <sup>11</sup>B NMR (160.4 Hz, CDCl<sub>3</sub>): 31.3 ppm. – IR: 2979, 1739, 1600, 1489, 1443, 1381, 1348, 1315, 1260, 1215, 1145, 1071, 963 cm<sup>-1</sup>. – HRMS: calcd for C<sub>16</sub>H<sub>24</sub>BO<sub>4</sub>: 291.1762, found 291.1760 [M+H<sup>+</sup>].

### 1-(Piperidin-1-yl)-2-(4-(trifluoro- $\lambda^4$ -boraneyl)phenyl)ethan-1-one, potassium salt (**21**)

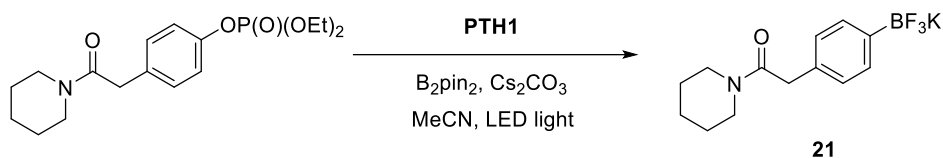

The general procedure GP1 was followed with diethyl (4-(2-oxo-2-(piperidin-1-yl)ethyl)phenyl) phosphate (71 mg, 0.2 mmol), B<sub>2</sub>pin<sub>2</sub> (152 mg, 0.6 mmol, 3.0 equiv.), Cs<sub>2</sub>CO<sub>3</sub> (197 mg, 0.6 mmol, 3.0 equiv.), **PTH1** (4.0 mg, 0.02 mmol, 10 mol%) and CH<sub>3</sub>CN (2 mL). The mixture was irradiated with a 400 nm LED light without air flow supply for 72 h. Purification by treatment with methylboronic acid and then KHF<sub>2</sub> according to GP4 afforded organotrifluoroborate salt **21** (50 mg, 80%) as a colorless solid.

M.p.: > 200 °C. – <sup>1</sup>H NMR (500 MHz, CD<sub>3</sub>CN): 7.40 (2 H, d, *J* = 7.4 Hz), 7.04 (2 H, d, *J* = 7.4 Hz), 3.62 (2 H, s), 3.44 (4 H, d, *J* = 36.2 Hz), 1.67–1.52 (2 H, m), 1.45 (2 H, s), 1.36 (2 H, s) ppm. – <sup>13</sup>C NMR (125 MHz, CD<sub>3</sub>CN): 170.6, 134.0, 132.5, 128.0, 47.7, 43.2, 41.2, 26.9, 26.3, 25.0 ppm. – <sup>11</sup>B NMR (160.4 Hz, CD<sub>3</sub>CN): 3.7 ppm. – <sup>19</sup>F NMR (470.5 Hz, CD<sub>3</sub>CN): –142.3 ppm. – IR: 3365, 2212, 1834, 1747, 1592, 1473, 1448, 1367, 1253, 1217, 1184, 1138, 957 cm<sup>-1</sup>. – HRMS: calcd for C<sub>13</sub>H<sub>16</sub>BF<sub>3</sub>NO: 270.1283, found 270.1292 [M–K<sup>+</sup>].

### 1-(Pyrrolidin-1-yl)-2-(4-(trifluoro- $\lambda^4$ -boraneyl)phenyl)ethan-1-one, potassium salt (**22**)

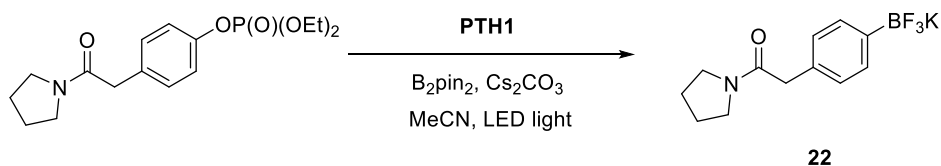

The general procedure GP1 was followed with diethyl (4-(2-oxo-2-(pyrrolidin-1-yl)ethyl)phenyl) phosphate (68 mg, 0.2 mmol), B<sub>2</sub>pin<sub>2</sub> (152 mg, 0.6 mmol, 3.0 equiv.), Cs<sub>2</sub>CO<sub>3</sub> (197 mg, 0.6 mmol, 3.0 equiv.), **PTH1** (4.0 mg, 0.02 mmol, 10 mol%) and CH<sub>3</sub>CN (2 mL). The mixture was irradiated with a 400 nm LED light without air flow supply for

72 h. Purification by treatment with methylboronic acid and then  $\text{KHF}_2$  according to GP4 afforded organotrifluoroborate salt **22** (38 mg, 65%) as a colorless solid.

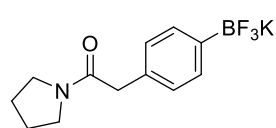

M.p.: > 200 °C. –  $^1\text{H}$  NMR (500 MHz,  $\text{CD}_3\text{CN}$ ): 7.37 (2 H, d,  $J = 7.7$  Hz), 7.04 (2 H, d,  $J = 7.5$  Hz), 3.54 (2 H, s), 3.44 (2 H, t,  $J = 6.8$  Hz), 3.33 (2 H, t,  $J = 6.9$  Hz), 1.88 (2 H, p,  $J = 6.6$  Hz), 1.79 (2 H, p,  $J = 6.7$  Hz) ppm. –  $^{13}\text{C}$  NMR (125 MHz,  $\text{CD}_3\text{CN}$ ): 170.8, 133.5, 132.4, 128.3, 47.5, 46.4, 42.5, 26.7, 25.0 ppm. –  $^{11}\text{B}$  NMR (160.4 Hz,  $\text{CD}_3\text{CN}$ ): 3.3 ppm. –  $^{19}\text{F}$  NMR (470.5 Hz,  $\text{CD}_3\text{CN}$ ): -142.4 ppm. – IR: 3350, 2087, 1664, 1597, 1457, 1398, 1343, 1218, 1184, 1005, 956  $\text{cm}^{-1}$ . – HRMS: calcd for  $\text{C}_{12}\text{H}_{14}\text{BF}_3\text{ON}$ : 256.1126, found 256.1130 [M-K $^+$ ].

**1-(Indolin-1-yl)-2-(4-(4,4,5,5-tetramethyl-1,3,2-dioxaborolan-2-yl)phenyl)ethan-1-one**  
(**23**)

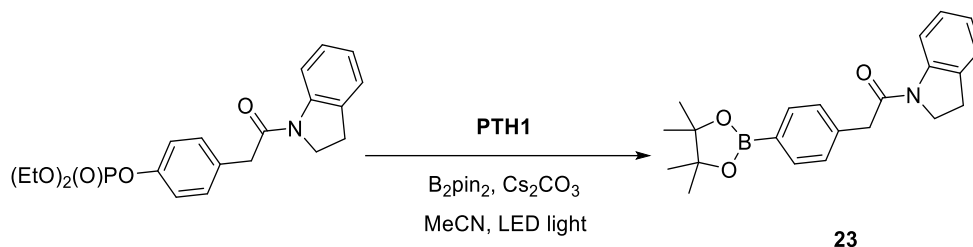

The general procedure GP1 was followed with diethyl (4-(2-(indolin-1-yl)-2-oxoethyl)phenyl) phosphate (78 mg, 0.2 mmol),  $\text{B}_2\text{pin}_2$  (152 mg, 0.6 mmol, 3.0 equiv.),  $\text{Cs}_2\text{CO}_3$  (197 mg, 0.6 mmol, 3.0 equiv.), **PTH1** (4.0 mg, 0.02 mmol, 10 mol%) and  $\text{CH}_3\text{CN}$  (2 mL). The mixture was irradiated with a 400 nm LED light without air flow supply for 72 h. Purification by flash chromatography on silica gel (EtOAc/hexane, 1 : 19 v/v) afforded **23** (62 mg, 85%) as a colorless solid.

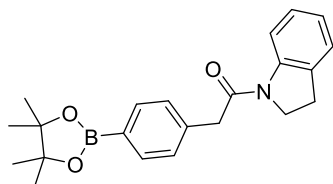

M.p.: 145–147 °C. –  $^1\text{H}$  NMR (500 MHz,  $\text{CDCl}_3$ ): 8.26 (1 H, d,  $J = 8.1$  Hz), 7.79 (2 H, d,  $J = 7.9$  Hz), 7.33 (2 H, d,  $J = 7.7$  Hz), 7.19 (1 H, t,  $J = 7.8$  Hz), 7.15 (1 H, d,  $J = 7.3$  Hz), 7.01 (1 H, t,  $J = 7.4$  Hz), 4.02 (2 H, t,  $J = 8.5$  Hz), 3.83 (2 H, s), 3.13 (2 H, t,  $J = 8.4$  Hz), 1.34 (12 H, s) ppm. –  $^{13}\text{C}$  NMR

(125 MHz, CDCl<sub>3</sub>): 169.0, 143.2, 137.5, 135.4, 131.2, 128.5, 127.7, 124.6, 123.9, 117.3, 83.9, 48.3, 44.1, 28.2, 25.0 ppm. – <sup>11</sup>B NMR (160.4 Hz, CDCl<sub>3</sub>): 31.0 ppm. – IR: 1740, 1620 1597, 1525, 1513, 1489, 1464, 1408, 1312, 1229, 1031, 983 cm<sup>-1</sup>. – HRMS: calcd for C<sub>22</sub>H<sub>27</sub>BNO<sub>3</sub>: 364.2079, found 364.2083 [M+H<sup>+</sup>].

### 1-Morpholino-2-(4-(trifluoro-λ<sup>4</sup>-boraneyl)phenyl)ethan-1-one, potassium salt (**24**)

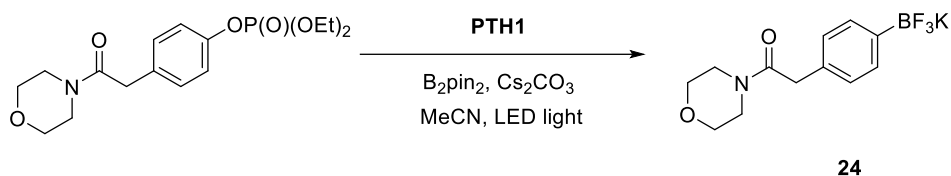

The general procedure GP1 was followed with diethyl (4-(2-morpholino-2-oxoethyl)phenyl) phosphate (72 mg, 0.2 mmol), B<sub>2</sub>pin<sub>2</sub> (152 mg, 0.6 mmol, 3.0 equiv.), Cs<sub>2</sub>CO<sub>3</sub> (197 mg, 0.6 mmol, 3.0 equiv.), **PTH1** (4.0 mg, 0.02 mmol, 10 mol%) and CH<sub>3</sub>CN (2 mL). The mixture was irradiated with a 400 nm LED light without air flow supply for 72 h. Purification by treatment with methylboronic acid and then KHF<sub>2</sub> according to GP4 afforded organotrifluoroborate salt **24** (43 mg, 70%) as a colorless solid.

M.p.: > 200 °C. – <sup>1</sup>H NMR (500 MHz, DMSO): 7.33 (2 H, d, *J* = 7.6 Hz), 6.99 (2 H, d, *J* = 7.5 Hz), 3.62 (2 H, s), 3.55 (2 H, t, *J* = 4.8 Hz), 3.49 (2 H, t, *J* = 4.7 Hz), 3.44 (4 H, s) ppm. – <sup>13</sup>C NMR (125 MHz, DMSO): 169.8, 131.8, 131.6, 126.7, 66.2, 66.1, 46.2, 41.7, 40.0 ppm. – <sup>11</sup>B NMR (160.4 Hz, DMSO): 3.1 ppm. – <sup>19</sup>F NMR (470.5 Hz, DMSO): -140.3 ppm. – IR: 3367, 2216, 1823, 1754, 1590, 1456, 1402, 1366, 1256, 1209, 1180, 1129, 950 cm<sup>-1</sup>. – HRMS: calcd for C<sub>12</sub>H<sub>14</sub>BF<sub>3</sub>NO<sub>2</sub>: 272.1075, found 272.1086 [M-K<sup>+</sup>].

### Pyrrolidin-1-yl(4-(trifluoro- $\lambda^4$ -boraneyl)phenyl)methanone, potassium salt (**25**)

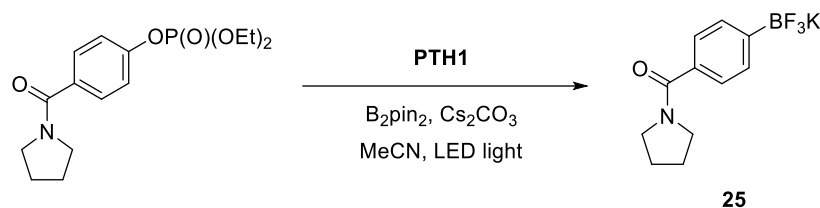

The general procedure GP1 was followed with diethyl 4-(pyrrolidine-1-carbonyl)phenyl phosphate (66 mg, 0.2 mmol), B<sub>2</sub>pin<sub>2</sub> (152 mg, 0.6 mmol, 3.0 equiv.), Cs<sub>2</sub>CO<sub>3</sub> (197 mg, 0.6 mmol, 3.0 equiv.), PTH1 (4.0 mg, 0.02 mmol, 10 mol%) and CH<sub>3</sub>CN (2 mL). The mixture was irradiated with a 400 nm LED light without air flow supply for 72 h. Purification by treatment with methylboronic acid and then KHF<sub>2</sub> according to GP4 afforded organotrifluoroborate salt **25** (35 mg, 62%) as a colorless solid.

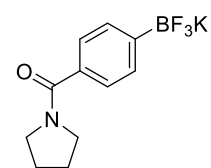

M.p.: > 200 °C. – <sup>1</sup>H NMR (500 MHz, CD<sub>3</sub>CN): 7.48 (2 H, d, *J* = 7.9 Hz), 7.30 (2 H, d, *J* = 7.7 Hz), 3.49 (2 H, t, *J* = 6.9 Hz), 3.41 (2 H, t, *J* = 6.6 Hz), 1.89 (2 H, p, *J* = 6.6 Hz), 1.81 (2 H, p, *J* = 6.4 Hz) ppm. – <sup>13</sup>C NMR (125 MHz, CD<sub>3</sub>CN): 171.1, 135.7, 131.9, 126.3, 50.2, 46.8, 27.0, 25.0 ppm. – <sup>11</sup>B NMR (160.4 Hz, CD<sub>3</sub>CN): 3.3 ppm. – <sup>19</sup>F NMR (470.5 Hz, CD<sub>3</sub>CN): –142.6 ppm. – IR: 3343, 2133, 1987, 1723, 1635, 1581, 1545, 1515, 1456, 1313, 1215, 1152, 956 cm<sup>-1</sup>. – HRMS: calcd for C<sub>11</sub>H<sub>12</sub>BF<sub>3</sub>ON: 242.0970, found 242.0977 [M–K<sup>+</sup>].

### *tert*-Butyl 4-(4-(trifluoro- $\lambda^4$ -boraneyl)benzamido)piperidine-1-carboxylate, potassium salt (**26**)

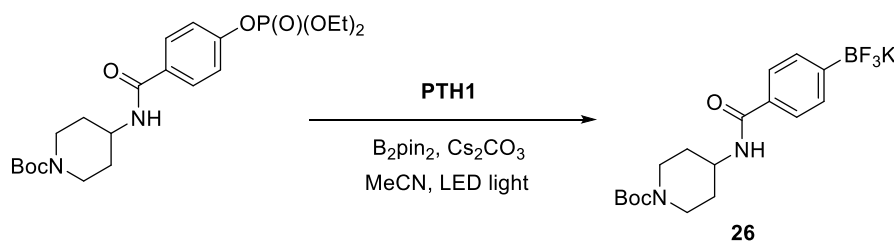



The general procedure GP1 was followed with *tert*-butyl 4-(4-((diethoxyphosphoryl)oxy)benzamido)piperidine-1-carboxylate (91 mg, 0.2 mmol), B<sub>2</sub>pin<sub>2</sub> (152 mg, 0.6 mmol, 3.0 equiv.), Cs<sub>2</sub>CO<sub>3</sub> (197 mg, 0.6 mmol, 3.0 equiv.), PTH1 (4.0 mg, 0.02 mmol, 10 mol%) and CH<sub>3</sub>CN (2 mL). The mixture was irradiated with a 400 nm LED light without air flow supply for 48 h. Purification by treatment with methylboronic acid and then KHF<sub>2</sub> according to GP4 afforded organotrifluoroborate salt **26** (43 mg, 52%) as a colorless solid.

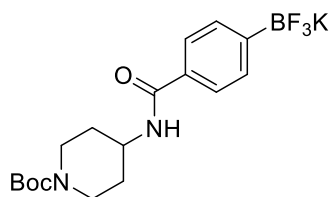

M.p.: > 200 °C. –<sup>1</sup>H NMR (500 MHz, DMSO/ CD<sub>3</sub>CN): 7.77 (1 H, s), 7.75 (2 H, d, *J* = 7.4 Hz), 7.59 (2 H, d, *J* = 7.5 Hz), 4.23–4.05 (3 H, m), 3.02 (2 H, t, *J* = 12.8 Hz), 1.97 (2 H, dd, *J* = 13.1, 3.7 Hz), 1.67–1.60 (2 H, m), 1.58 (9 H, s) ppm. –<sup>13</sup>C NMR (125 MHz, DMSO/CD<sub>3</sub>CN): 166.9, 154.1, 131.6, 130.9, 125.0, 78.5, 46.4, 42.6, 31.3, 27.7 ppm. –<sup>11</sup>B NMR (160.4 Hz, CD<sub>3</sub>CN): 0.83 (q, *J* = 18.3 Hz) ppm. –<sup>19</sup>F NMR (470.5 Hz, CD<sub>3</sub>CN): –139.2 ppm. – IR: 3372, 2028, 1635, 1541, 1479, 1433, 1367, 1332, 1274, 1240, 1210, 1152, 1075, 973 cm<sup>-1</sup>. – HRMS: calcd for C<sub>17</sub>H<sub>23</sub>BF<sub>3</sub>O<sub>3</sub>N<sub>2</sub>: 371.1759, found 371.1767 [M–K<sup>+</sup>].

***tert*-Butyl 5-(4,4,5,5-tetramethyl-1,3,2-dioxaborolan-2-yl)-3,4-dihydroquinoline-1(2*H*)-carboxylate (27)**

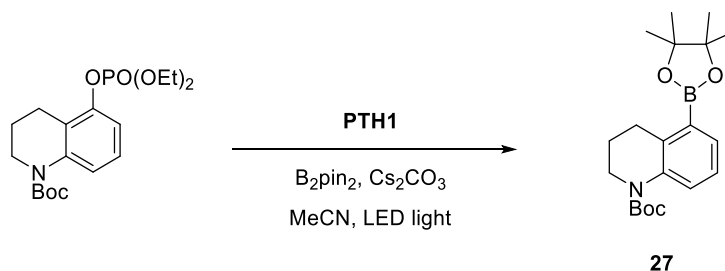

The general procedure GP1 was followed with *tert*-butyl 5-((diethoxyphosphoryl)oxy)-3,4-dihydroquinoline-1(2*H*)-carboxylate (77 mg, 0.2 mmol), B<sub>2</sub>pin<sub>2</sub> (152 mg, 0.6 mmol, 3.0 equiv.), Cs<sub>2</sub>CO<sub>3</sub> (197 mg, 0.6 mmol, 3.0 equiv.), PTH1 (4.0 mg, 0.02 mmol, 10 mol%) and

CH<sub>3</sub>CN (2 mL). The mixture was irradiated with a 400 nm LED light without air flow supply for 72 h. Purification by flash chromatography on silica gel (EtOAc/hexane, 1 : 4 v/v) afford product **27** (47 mg, 65%) as a colorless liquid.

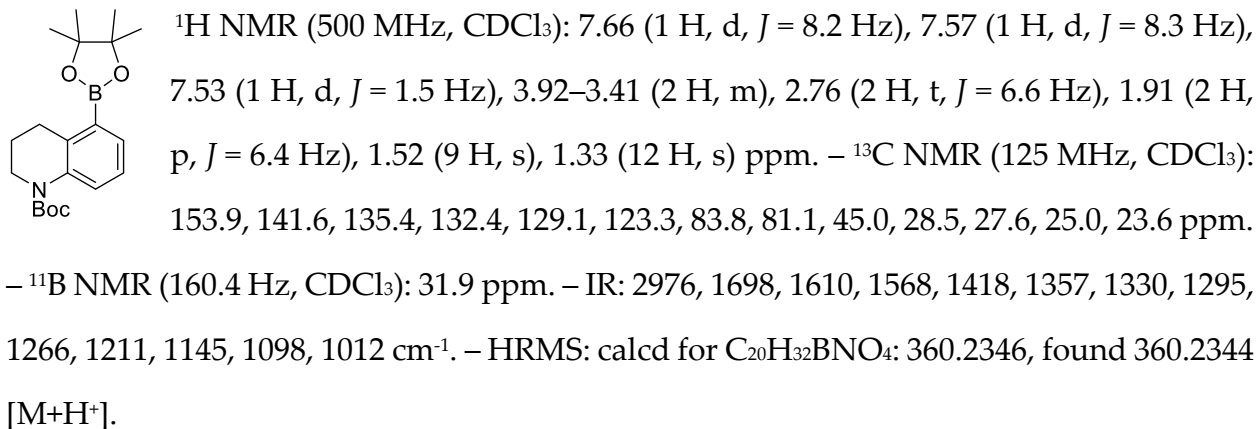

***tert*-Butyl 4-(4,4,5,5-tetramethyl-1,3,2-dioxaborolan-2-yl)indoline-1-carboxylate (**28**)**<sup>[23]</sup>

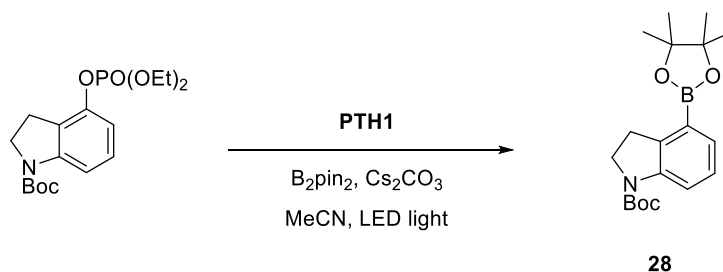

The general procedure GP1 was followed with *tert*-butyl 4-((diethoxyphosphoryl)oxy)indoline-1-carboxylate (74 mg, 0.2 mmol), B<sub>2</sub>pin<sub>2</sub> (152 mg, 0.6 mmol, 3.0 equiv.), Cs<sub>2</sub>CO<sub>3</sub> (197 mg, 0.6 mmol, 3.0 equiv.), **PTH1** (4.0 mg, 0.02 mmol, 10 mol%) and CH<sub>3</sub>CN (2 mL). The mixture was irradiated with a 400 nm LED light without air flow supply for 72 h. Purification by flash chromatography on silica gel (EtOAc/hexane, 1 : 4 v/v) afford product **28** (35 mg, 50%) as a colorless liquid.

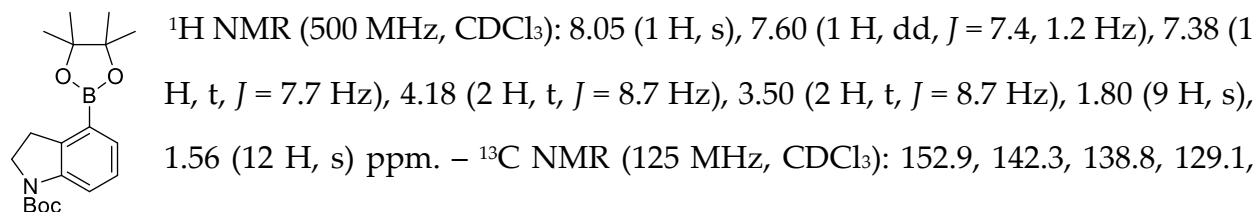

126.8, 117.5, 83.7, 80.8, 47.8, 28.7, 25.1 ppm. –  $^{11}\text{B}$  NMR (160.4 Hz,  $\text{CDCl}_3$ ): 31.6 ppm. – IR: 2984, 1736, 1448, 1373, 1236, 1140, 1097, 1044, 917  $\text{cm}^{-1}$ .

**2-([1,1'-Biphenyl]-4-yl)-4,4,5,5-tetramethyl-1,3,2-dioxaborolane (**29**)<sup>[15]</sup>**

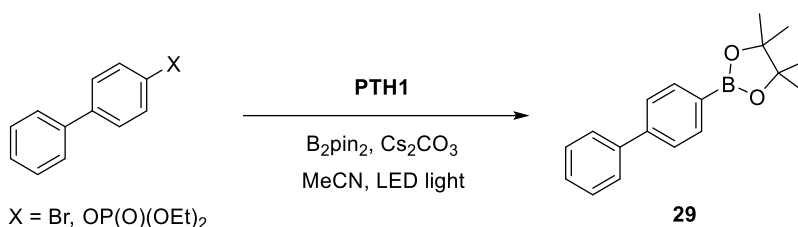

**From 4-bromo-1,1'-biphenyl:** The general procedure GP1 was followed with 4-bromo-1,1'-biphenyl (47 mg, 0.2 mmol),  $\text{B}_2\text{pin}_2$  (101 mg, 0.4 mmol, 2.0 equiv.),  $\text{Cs}_2\text{CO}_3$  (132 mg, 0.4 mmol, 2.0 equiv.), **PTH1** (0.08 mg, 0.0004 mmol, 0.2 mol%) and  $\text{CH}_3\text{CN}$  (2 mL). The mixture was irradiated with a 400 nm LED light for 48 h. Purification by flash chromatography on silica gel (EtOAc/hexane, 1 : 19 v/v) afford product **29** (45 mg, 80%) as a colorless oil.

**From [1,1'-biphenyl]-4-yl diethyl phosphate:** The general procedure GP1 was followed with [1,1'-biphenyl]-4-yl diethyl phosphate (61 mg, 0.2 mmol),  $\text{B}_2\text{pin}_2$  (152 mg, 0.6 mmol, 3.0 equiv.),  $\text{Cs}_2\text{CO}_3$  (197 mg, 0.6 mmol, 3.0 equiv.), **PTH1** (4.8 mg, 0.024 mmol, 12 mol%) and  $\text{CH}_3\text{CN}$  (2 mL). The mixture was irradiated with a 400 nm LED light without air flow supply for 36 h. Purification by flash chromatography on silica gel (EtOAc/hexane, 1 : 19 v/v) afforded product **29** (39 mg, 70%) as a colorless oil.

**From [1,1'-biphenyl]-4-yl diethyl phosphate with 2 equiv. of  $\text{B}_2\text{pin}_2$ :** The general procedure GP1 was followed with [1,1'-biphenyl]-4-yl diethyl phosphate (61 mg, 0.2 mmol),  $\text{B}_2\text{pin}_2$  (101 mg, 0.4 mmol, 2.0 equiv.),  $\text{Cs}_2\text{CO}_3$  (197 mg, 0.6 mmol, 3.0 equiv.), **PTH1** (4.8 mg, 0.024 mmol, 12 mol%) and  $\text{CH}_3\text{CN}$  (2 mL). The mixture was irradiated with a 400 nm LED light without air flow supply for 36 h. Purification by flash chromatography on silica gel (EtOAc/hexane, 1 : 19 v/v) afforded product **29** (39 mg, 70%) as a colorless oil.

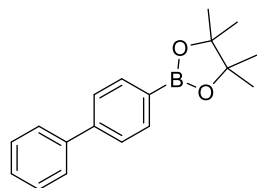

$^1\text{H}$  NMR (500 MHz,  $\text{CDCl}_3$ ): 7.90 (2 H, d,  $J = 8.1$  Hz), 7.68–7.59 (4 H, m), 7.45 (2 H, t,  $J = 7.6$  Hz), 7.37 (1 H, t,  $J = 7.4$  Hz), 1.38 (12 H, s) ppm.

–  $^{13}\text{C}$  NMR (125 MHz,  $\text{CDCl}_3$ ): 144.0, 141.2, 135.4, 128.9, 127.7, 127.4,

126.6, 84.0, 25.0 ppm. –  $^{11}\text{B}$  NMR (160.4 Hz,  $\text{CDCl}_3$ ): 30.9 ppm. – IR: 2978, 2200, 1735, 1609, 1360, 1321, 1238, 1143, 1093, 1045, 1021, 1008  $\text{cm}^{-1}$ .

#### 4,4,5,5-Tetramethyl-2-(naphthalen-1-yl)-1,3,2-dioxaborolane (**30**)<sup>[15]</sup>

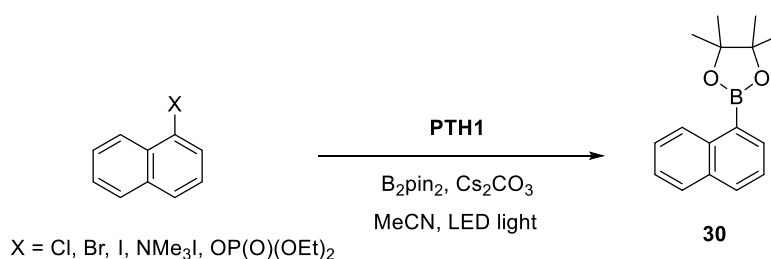

**From 1-iodonaphthalene:** The general procedure GP1 was followed with 1-iodonaphthalene (47 mg, 0.2 mmol),  $\text{B}_2\text{pin}_2$  (101 mg, 0.4 mmol, 2.0 equiv.),  $\text{Cs}_2\text{CO}_3$  (132 mg, 0.4 mmol, 2.0 equiv.), **PTH1** (0.08 mg, 0.0004 mmol, 0.2 mol%) and  $\text{CH}_3\text{CN}$  (2 mL). The mixture was irradiated with a 400 nm LED light without air flow supply for 48 h. Purification by flash chromatography on silica gel (EtOAc/hexane, 1 : 19 v/v) afford product **30** (38 mg, 75%) as a colorless solid.

**From 1-bromonaphthalene:** The general procedure GP1 was followed with 1-bromonaphthalene (41 mg, 0.2 mmol),  $\text{B}_2\text{pin}_2$  (101 mg, 0.4 mmol, 2.0 equiv.),  $\text{Cs}_2\text{CO}_3$  (132 mg, 0.4 mmol, 2.0 equiv.), **PTH1** (0.8 mg, 0.004 mmol, 2 mol%) and  $\text{CH}_3\text{CN}$  (2 mL). The mixture was irradiated with a 400 nm LED light for 48 h. Purification by flash chromatography on silica gel (EtOAc/hexane, 1 : 19 v/v) afford product **30** (42 mg, 82%) as a colorless solid.

**From 1-chloronaphthalene:** The general procedure GP1 was followed with 1-chloronaphthalene (32 mg, 0.2 mmol),  $\text{B}_2\text{pin}_2$  (101 mg, 0.4 mmol, 2.0 equiv.),  $\text{Cs}_2\text{CO}_3$  (132 mg, 0.4 mmol, 2.0 equiv.), **PTH1** (0.8 mg, 0.004 mmol, 2 mol%) and  $\text{CH}_3\text{CN}$  (2 mL). The

mixture was irradiated with a 400 nm LED light at 24 °C for 48 h. Purification by flash chromatography on silica gel (EtOAc/hexane, 1 : 19 v/v) afford product **30** (36 mg, 70%) as a colorless solid.

**From *N,N,N*-trimethylnaphthalen-1-aminium iodide:** The general procedure GP1 was followed with *N,N,N*-trimethylnaphthalen-1-aminium iodide (62 mg, 0.2 mmol), B<sub>2</sub>pin<sub>2</sub> (152 mg, 0.6 mmol, 3.0 equiv.), Cs<sub>2</sub>CO<sub>3</sub> (197 mg, 0.6 mmol, 3.0 equiv.), **PTH1** (2.0 mg, 0.01 mmol, 5 mol%) and CH<sub>3</sub>CN (2 mL). The mixture was irradiated with a 450 nm LED light for 18 h. Purification by flash chromatography on silica gel (EtOAc/hexane, 1 : 19 v/v) afforded product **30** (43 mg, 85%) as a colorless solid.

**Gram scale from *N,N,N*-trimethylnaphthalen-1-aminium iodide:** According to general procedure GP1 three identical reactions were run with *N,N,N*-trimethylnaphthalen-1-aminium iodide (1.08 g, 3.5 mmol), B<sub>2</sub>pin<sub>2</sub> (2.67 g, 10.5 mmol, 3.0 equiv.), Cs<sub>2</sub>CO<sub>3</sub> (3.45 g, 10.5 mmol, 3.0 equiv.), **PTH1** (34.9 mg, 0.175 mmol, 5 mol%) and CH<sub>3</sub>CN (2 mL). The mixture was irradiated with a 450 nm LED light for 24 h. Purification by flash chromatography on silica gel (EtOAc/hexane, 1 : 19 v/v) afforded product **30** (1.6 g, 60%) as a colorless solid.

**From [1,1'-biphenyl]-4-yl diethyl phosphate:** The general procedure GP1 was followed with [1,1'-biphenyl]-4-yl diethyl phosphate (61 mg, 0.2 mmol), B<sub>2</sub>pin<sub>2</sub> (152 mg, 0.6 mmol, 3.0 equiv.), Cs<sub>2</sub>CO<sub>3</sub> (197 mg, 0.6 mmol, 3.0 equiv.), **PTH1** (4.8 mg, 0.024 mmol, 12 mol%) and CH<sub>3</sub>CN (2 mL). The mixture was irradiated with a 450 nm LED light for 72 h. Purification by flash chromatography on silica gel (EtOAc/hexane, 1 : 19 v/v) afforded product **30** (39 mg, 85%) as a colorless solid.

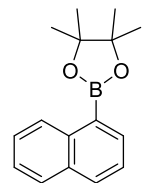

M.p.: 40–43 °C. – <sup>1</sup>H NMR (500 MHz, CDCl<sub>3</sub>): 8.80 (1 H, d, *J* = 8.4 Hz), 8.11 (1 H, d, *J* = 6.8 Hz), 7.95 (1 H, d, *J* = 8.2 Hz), 7.85 (1 H, d, *J* = 8.1 Hz), 7.56 (1 H, t, *J* = 7.6 Hz), 7.49 (2 H, t, *J* = 7.4 Hz), 1.45 (12 H, s) ppm. – <sup>13</sup>C NMR (125 MHz, CDCl<sub>3</sub>): 137.1, 135.8, 133.3, 131.7, 128.6, 128.5, 126.5, 125.6, 125.1, 83.8, 25.1 ppm. – <sup>11</sup>B NMR

(160.4 Hz, CDCl<sub>3</sub>): 31.7 ppm. – IR: 3042, 2976, 1713, 1576, 1507, 1462, 1413, 1390, 1335, 1296, 1274, 1255, 1205, 1133, 1023 cm<sup>-1</sup>.

**(8*R*,9*S*,13*S*,14*S*)-13-Methyl-3-(trifluoro-*l*-boraneyl)-6,7,8,9,11,12,13,14,15,16-decahydro-17*H*-cyclopenta[*a*]phenanthren-17-one, potassium salt (31)**

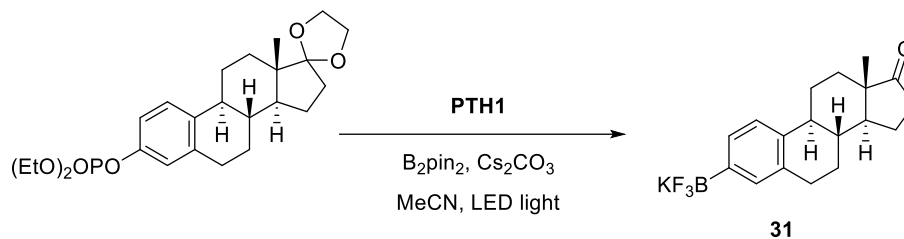

The general procedure GP1 was followed with diethyl ((8*R*,9*S*,13*S*,14*S*)-13-methyl-6,7,8,9,11,12,13,14,15,16-decahydrospiro[cyclopenta[*a*]phenanthrene-17,2'-[1,3]dioxolan]-3-yl) phosphate (90 mg, 0.2 mmol), B<sub>2</sub>pin<sub>2</sub> (152 mg, 0.6 mmol, 3.0 equiv.), Cs<sub>2</sub>CO<sub>3</sub> (197 mg, 0.6 mmol, 3.0 equiv.), **PTH1** (4.0 mg, 0.02 mmol, 10 mol%) H<sub>2</sub>O (3.6 mg, 0.2 mmol, 1.0 equiv.), and CH<sub>3</sub>CN (2 mL). The mixture was irradiated with a 400 nm LED light without air flow supply for 72 h. Purification by treatment with methylboronic acid and then KHF<sub>2</sub> according to GP4 afforded organotrifluoroborate salt **31** (37 mg, 52%) as a colorless solid.

[α]<sub>D</sub> = +92 (*c* 0.12M, CH<sub>3</sub>CN). – m.p.: > 200 °C. – <sup>1</sup>H NMR (500 MHz, CD<sub>3</sub>CN): 7.35 (1 H, d, *J* = 7.7 Hz), 7.32 (1 H, s), 7.27 (1 H, d, *J* = 7.7 Hz), 3.15–2.95 (2 H, m), 2.66–2.56 (2 H, m), 2.45 (1 H, td, *J* = 10.8, 4.0 Hz), 2.24–2.17 (3 H, m), 2.06–1.99 (1 H, m), 1.87–1.51 (6 H, m), 1.07 (3 H, s) ppm. – <sup>13</sup>C NMR (125 MHz, CD<sub>3</sub>CN): 221.3, 137.5, 135.0, 133.2, 129.8, 124.3, 51.3, 48.7, 45.4, 39.4, 36.3, 32.6, 30.2, 27.6, 26.7, 22.2, 14.2 ppm. – <sup>11</sup>B NMR (160.4 Hz, CD<sub>3</sub>CN): 3.6 ppm. – <sup>19</sup>F NMR (470.5 Hz, CD<sub>3</sub>CN): –141.7 ppm. – IR: 3420, 2035, 1972, 1724, 1608, 1493, 1456, 1407, 1366, 1217, 1087 cm<sup>-1</sup>. – HRMS: calcd for C<sub>18</sub>H<sub>21</sub>BF<sub>3</sub>O: 321.1643, found 321.1631 [M–K<sup>+</sup>].

***tert*-Butyldimethyl(((8*R*,9*S*,13*S*,14*S*,17*S*)-13-methyl-3-(4,4,5,5-tetramethyl-1,3,2-dioxaborolan-2-yl)-7,8,9,11,12,13,14,15,16,17-decahydro-6*H*-cyclopenta[*a*]phenanthren-17-yl)oxy)silane (32)**

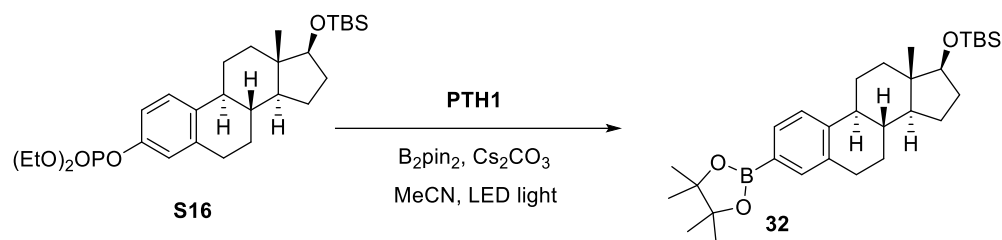

The general procedure GP1 was followed with **S16** (104 mg, 0.2 mmol),  $\text{B}_2\text{pin}_2$  (152 mg, 0.6 mmol, 3.0 equiv.),  $\text{Cs}_2\text{CO}_3$  (197 mg, 0.6 mmol, 3.0 equiv.), **PTH1** (4.0 mg, 0.02 mmol, 10 mol%),  $\text{H}_2\text{O}$  (3.6 mg, 0.2 mmol, 1.0 equiv.), and  $\text{CH}_3\text{CN}$  (2 mL). The mixture was irradiated with a 400 nm LED light without air flow supply for 72 h. Purification by flash chromatography on silica gel (EtOAc/hexane, 1 : 9 v/v) afford product **32** (41 mg, 70%) as a colorless liquid.

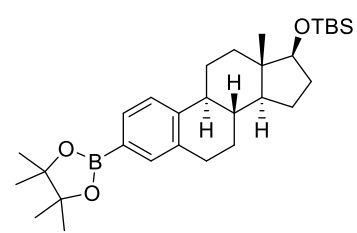

$[\alpha]_{\text{D}} = +75$  (*c* 0.06M,  $\text{CHCl}_3$ ). –  $^1\text{H}$  NMR (500 MHz,  $\text{CDCl}_3$ ): 7.58 (1 H, d, *J* = 6.5 Hz), 7.55 (1 H, s), 7.32 (1 H, d, *J* = 7.8 Hz), 3.65 (1 H, t, *J* = 8.3 Hz), 2.88 (2 H, dd, *J* = 8.9, 4.2 Hz), 2.45–2.11 (2 H, m), 1.99–1.85 (3 H, m), 1.71–1.61 (1 H, m), 1.58–1.35 (3 H, m), 1.34 (12 H, s), 1.33–1.21 (2 H, m), 1.21–1.10 (2 H, m), 0.90 (9 H, s), 0.74 (3 H, s), 0.04 (3 H, s), 0.03 (3 H, s) ppm. –  $^{13}\text{C}$  NMR (125 MHz,  $\text{CDCl}_3$ ): 144.2, 136.3, 135.7, 132.1, 125.0, 83.8, 81.9, 50.0, 45.0, 43.7, 38.7, 37.3, 31.1, 29.5, 27.4, 26.2, 26.0, 25.0, 24.9, 23.4, 18.3, 11.5, –4.3, –4.6 ppm. –  $^{11}\text{B}$  NMR (160.4 Hz,  $\text{CDCl}_3$ ): 33.0 ppm. – IR: 2953, 2928, 1610, 1471, 1363, 1351, 1312, 1255, 1145, 1099, 1007, 966, 916  $\text{cm}^{-1}$ . – HRMS: calcd for  $\text{C}_{30}\text{H}_{50}\text{BO}_3\text{Si}$ : 497.3617, found 497.3616  $[\text{M}+\text{H}^+]$ .

**Ethyl (S)-2-acetamido-3-(4-(trifluoro- $\lambda^4$ -boraneyl)phenyl)propanoate, potassium salt**

**(33)**

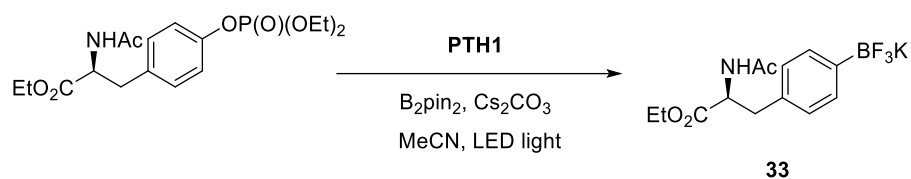

The general procedure GP1 was followed with ethyl (S)-2-acetamido-3-(4-((diethoxyphosphoryl)oxy)phenyl)propanoate (78 mg, 0.2 mmol), B<sub>2</sub>pin<sub>2</sub> (152 mg, 0.6 mmol, 3.0 equiv.), Cs<sub>2</sub>CO<sub>3</sub> (197 mg, 0.6 mmol, 3.0 equiv.), **PTH1** (4.0 mg, 0.02 mmol, 10 mol%) and CH<sub>3</sub>CN (2 mL). The mixture was irradiated with a 400 nm LED light without air flow supply for 72 h. Purification by treatment with methylboronic acid and then KHF<sub>2</sub> according to GP4 afforded organotrifluoroborate salt **33** (38 mg, 56%) as a colorless solid.

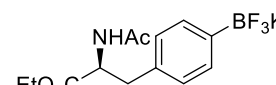  $[\alpha]_D = +50$  (c 0.6M, CH<sub>3</sub>CN). – M.p.: > 200 °C. – <sup>1</sup>H NMR (500 MHz, CD<sub>3</sub>CN): 7.40 (2 H, d, J = 7.7 Hz), 7.03 (2 H, d, J = 7.6 Hz), 6.78 (1 H, d, J = 7.8 Hz), 4.56 (1 H, td, J = 7.9, 5.7 Hz), 4.11 (2 H, q, J = 7.0 Hz), 3.03 (1 H, dd, J = 13.8, 5.6 Hz), 2.88 (1 H, dd, J = 13.8, 8.0 Hz), 1.84 (3 H, s), 1.21 (3 H, t, J = 7.1 Hz) ppm. – <sup>13</sup>C NMR (125 MHz, CD<sub>3</sub>CN): 172.7, 170.9, 134.8, 132.3, 128.6, 61.8, 55.0, 38.2, 22.7, 14.4 ppm. – <sup>11</sup>B NMR (160.4 Hz, CD<sub>3</sub>CN): 3.4 ppm. – <sup>19</sup>F NMR (470.5 Hz, CD<sub>3</sub>CN): –142.0 ppm. – IR: 3370, 2989, 1732, 1649, 1558, 1502, 1441, 1371, 1259, 1219, 1174, 1031, 977 cm<sup>-1</sup>. – HRMS: calcd for C<sub>13</sub>H<sub>16</sub>BF<sub>3</sub>NO<sub>3</sub>: 302.1181, found 302.1190 [M–K<sup>+</sup>].

***tert*-Butyl (4-(4,4,5,5-tetramethyl-1,3,2-dioxaborolan-2-yl)phenethyl)carbamate (34)<sup>[24]</sup>**

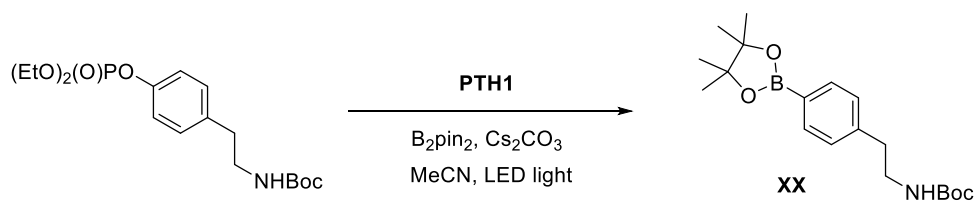



The general procedure GP1 was followed with *tert*-butyl (4-((diethoxyphosphoryl)oxy)phenethyl)carbamate (75 mg, 0.2 mmol), B<sub>2</sub>pin<sub>2</sub> (152 mg, 0.6 mmol, 3.0 equiv.), Cs<sub>2</sub>CO<sub>3</sub> (197 mg, 0.6 mmol, 3.0 equiv.), **PTH1** (4.0 mg, 0.02 mmol, 10 mol%) and CH<sub>3</sub>CN (2 mL). The mixture was irradiated with a 400 nm LED light with air flow supply off (without air flow supply) for 48 h. Purification by flash chromatography on silica gel (EtOAc/hexane, 1 : 14 v/v) afford product **34** (55 mg, 80%) as a colorless liquid.

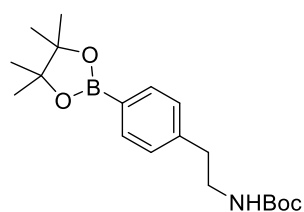

<sup>1</sup>H NMR (500 MHz, CDCl<sub>3</sub>): 7.75 (2 H, d, *J* = 7.9 Hz), 7.20 (2 H, d, *J* = 7.7 Hz), 4.55 (1 H, s), 3.37 (2 H, d, *J* = 6.2 Hz), 2.80 (2 H, t, *J* = 6.9 Hz), 1.42 (9 H, s), 1.33 (12 H, s) ppm. – <sup>13</sup>C NMR (125 MHz, CDCl<sub>3</sub>): 156.0, 142.5, 135.2, 128.4, 83.8, 79.3, 41.8, 36.4, 28.5, 25.0 ppm. – <sup>11</sup>B NMR (160.4 Hz, CDCl<sub>3</sub>): 30.9 ppm. – IR: 1977, 1698, 1612, 1518, 1398, 1360, 1318, 1271, 1249, 1215, 1167, 1143, 1089, 1022, 962 cm<sup>-1</sup>.

#### ***N*-(2-Morpholinoethyl)-4-(trifluoro-λ<sup>4</sup>-boraneyl)benzamide, potassium salt (**35**)**

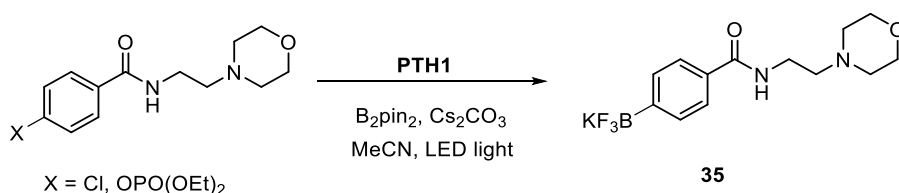

**From 4-chloro-*N*-(2-morpholinoethyl)benzamide:** The general procedure GP1 was followed with 4-chloro-*N*-(2-morpholinoethyl)benzamide (54 mg, 0.2 mmol), B<sub>2</sub>pin<sub>2</sub> (152 mg, 0.6 mmol, 3.0 equiv.), Cs<sub>2</sub>CO<sub>3</sub> (132 mg, 0.4 mmol, 2.0 equiv.), **PTH1** (0.8 mg, 0.004 mmol, 2 mol%) and CH<sub>3</sub>CN (2 mL). The mixture was irradiated with a 400 nm LED light for 48 h. Purification by Kugelrohr distillation (145 °C, 1.5 h), followed by treatment with 4.5M KHF<sub>2</sub> (0.12 mL, 0.54 mmol, 2.7 equiv.) and K<sub>2</sub>CO<sub>3</sub> according to GP4 afforded organotrifluoroborate salt **35** (44 mg, 66%) as a colorless solid.

**From diethyl (4-((2-morpholinoethyl)carbamoyl)phenyl) phosphate:** The general procedure GP1 was followed with diethyl (4-((2-morpholinoethyl)carbamoyl)phenyl) phosphate **S28** (78 mg, 0.2 mmol), B<sub>2</sub>pin<sub>2</sub> (152 mg, 0.6 mmol, 3.0 equiv.), Cs<sub>2</sub>CO<sub>3</sub> (197 mg, 0.6 mmol, 3.0 equiv.), **PTH1** (4.0 mg, 0.02 mmol, 10 mol%) and CH<sub>3</sub>CN (2 mL). Purification by Kugelrohr distillation (145 °C, 1.5 h), followed by treatment with 4.5M KHF<sub>2</sub> (0.12 mL, 0.54 mmol, 2.7 equiv.) and K<sub>2</sub>CO<sub>3</sub> according to GP4 afforded organotrifluoroborate salt **35** (33 mg, 48%) as a colorless solid.

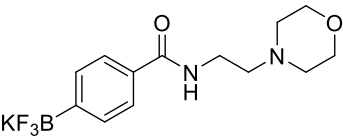 M.p.: > 200 °C. – <sup>1</sup>H NMR (500 MHz, CD<sub>3</sub>CN): 7.58 (2 H, d, *J* = 7.8 Hz), 7.51 (2 H, d, *J* = 7.9 Hz), 6.97 (1 H, s), 3.63 (4 H, t, *J* = 4.6 Hz), 3.44 (2 H, q, *J* = 6.2 Hz), 2.52 (2 H, t, *J* = 6.5 Hz), 2.46 (4 H, t, *J* = 4.6 Hz) ppm. – <sup>13</sup>C NMR (125 MHz, CD<sub>3</sub>CN): 168.7, 132.8, 132.3, 126.0, 67.6, 58.2, 54.3, 37.1 ppm. – <sup>11</sup>B NMR (160.4 Hz, CD<sub>3</sub>CN): 3.2 ppm. – <sup>19</sup>F NMR (470.5 Hz, CD<sub>3</sub>CN): –142.7 ppm. – IR: 3382, 1625, 1545, 1450, 1313, 1267, 1208, 1112, 1068, 956 cm<sup>-1</sup>. – HRMS: calcd for C<sub>13</sub>H<sub>17</sub>BF<sub>3</sub>N<sub>2</sub>O<sub>2</sub>: 301.1341, found 301.1336 [M–K<sup>+</sup>].

### 2-(2-Ethylphenyl)-4,4,5,5-tetramethyl-1,3,2-dioxaborolane (**36**)<sup>[25]</sup>

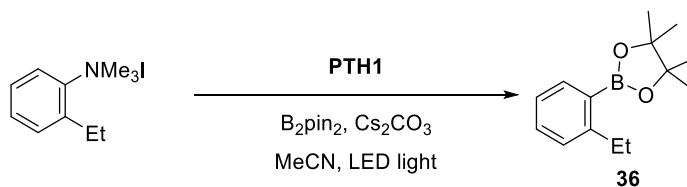

**At 400 nm wavelength:** The general procedure GP1 was followed with 2-ethyl-*N,N,N*-trimethylbenzenaminium iodide (58 mg, 0.2 mmol), B<sub>2</sub>pin<sub>2</sub> (152 mg, 0.6 mmol, 3.0 equiv.), Cs<sub>2</sub>CO<sub>3</sub> (197 mg, 0.6 mmol, 3.0 equiv.), **PTH1** (2.0 mg, 0.01 mmol, 5 mol%) and CH<sub>3</sub>CN (2 mL). The mixture was irradiated with a 400 nm LED light for 18 h. Purification by flash chromatography on silica gel (EtOAc/hexane, 1 : 19 v/v) afford product **36** (36 mg, 78%) as a colorless oil.

**With 420 nm LED light:** The general procedure GP1 was followed with 2-ethyl-*N,N,N*-trimethylbenzenaminium iodide (58 mg, 0.2 mmol), B<sub>2</sub>pin<sub>2</sub> (152 mg, 0.6 mmol, 3.0 equiv.), Cs<sub>2</sub>CO<sub>3</sub> (197 mg, 0.6 mmol, 3.0 equiv.), **PTH1** (2.0 mg, 0.01 mmol, 5 mol%) and CH<sub>3</sub>CN (2 mL). The mixture was irradiated with a 420 nm LED light for 18 h. Purification by flash chromatography on silica gel (EtOAc/hexane, 1 : 19 v/v) afford product **36** (28 mg, 61%) as a colorless oil.

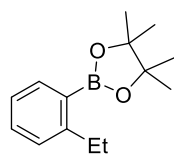

<sup>1</sup>H NMR (500 MHz, CDCl<sub>3</sub>): 7.78 (1 H, d, *J* = 7.4 Hz), 7.36 (1 H, t, *J* = 8.2 Hz), 7.22–7.16 (2 H, m), 2.92 (2 H, q, *J* = 7.5 Hz), 1.35 (12 H, s), 1.21 (3 H, t, *J* = 7.5 Hz) ppm. – <sup>13</sup>C NMR (125 MHz, CDCl<sub>3</sub>): 151.6, 136.2, 131.1, 128.5, 125.0, 83.5, 29.0, 25.0, 17.3 ppm. – <sup>11</sup>B NMR (160.4 Hz, CDCl<sub>3</sub>): 31.4 ppm. – IR: 2976, 2929, 2871, 1599, 1488, 1439, 1379, 1346, 1310, 1273, 1259, 1214, 1144, 1125, 1110, 1077, 1030 cm<sup>-1</sup>.

### 2-(3-Ethylphenyl)-4,4,5,5-tetramethyl-1,3,2-dioxaborolane (**37**)<sup>[16]</sup>

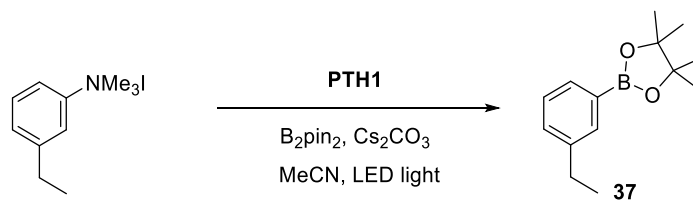

The general procedure GP1 was followed with 3-ethyl-*N,N,N*-trimethylbenzenaminium iodide (58 mg, 0.2 mmol), B<sub>2</sub>pin<sub>2</sub> (152 mg, 0.6 mmol, 3.0 equiv.), Cs<sub>2</sub>CO<sub>3</sub> (197 mg, 0.6 mmol, 3.0 equiv.), **PTH1** (2.0 mg, 0.01 mmol, 5 mol%) and CH<sub>3</sub>CN (2 mL). The mixture was irradiated with a 400 nm LED light for 18 h. Purification by flash chromatography on silica gel (EtOAc/hexane, 1 : 19 v/v) afford product **37** (35 mg, 78%) as a colorless oil.

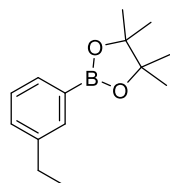

<sup>1</sup>H NMR (500 MHz, CDCl<sub>3</sub>): 7.66 (2 H, s), 7.64 (2 H, dd, *J* = 5.2, 3.4 Hz), 7.33–7.28 (2 H, m), 2.66 (2 H, q, *J* = 7.6 Hz), 1.35 (12 H, s), 1.25 (3 H, t, *J* = 7.6 Hz) ppm. – <sup>13</sup>C NMR (125 MHz, CDCl<sub>3</sub>): 143.6, 134.4, 132.2, 131.0, 127.9, 83.8,

29.0, 25.0, 15.9 ppm. –  $^{11}\text{B}$  NMR (160.4 Hz,  $\text{CDCl}_3$ ): 31.1 ppm. – IR: 2976, 2930, 1605, 1462, 1388, 1356, 1317, 1273, 1202, 1143, 1110, 1080, 961  $\text{cm}^{-1}$ .

**2-(3,5-Dimethylphenyl)-4,4,5,5-tetramethyl-1,3,2-dioxaborolane (38)**<sup>[15]</sup>

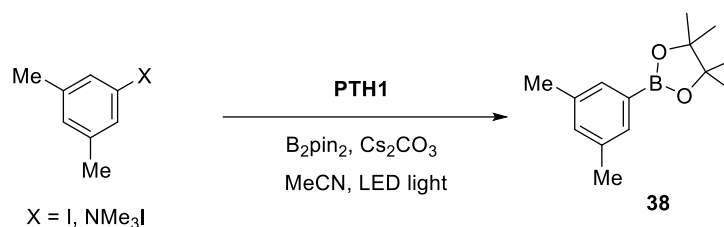

**From 1-iodo-3,5-dimethylbenzene:** The general procedure GP1 was followed with 1-iodo-3,5-dimethylbenzene (46 mg, 0.2 mmol), B<sub>2</sub>pin<sub>2</sub> (101 mg, 0.4 mmol, 2.0 equiv.), Cs<sub>2</sub>CO<sub>3</sub> (132 mg, 0.4 mmol, 2.0 equiv.), **PTH1** (0.4 mg, 0.002 mmol, 1 mol%) and CH<sub>3</sub>CN (2 mL). The mixture was irradiated with a 400 nm LED light for 18 h. Purification by flash chromatography on silica gel (EtOAc/hexane, 1 : 19 v/v) afford product **38** (30 mg, 66%) as a colorless solid.

**From *N,N,N,3,5*-pentamethylbenzenaminium iodide:** The general procedure GP1 was followed with *N,N,N,3,5*-pentamethylbenzenaminium iodide (58 mg, 0.2 mmol), B<sub>2</sub>pin<sub>2</sub> (152 mg, 0.6 mmol, 3.0 equiv.), Cs<sub>2</sub>CO<sub>3</sub> (197 mg, 0.6 mmol, 3.0 equiv.), **PTH1** (2.0 mg, 0.01 mmol, 5 mol%) and CH<sub>3</sub>CN (2 mL). The mixture was irradiated with a 400 nm LED light for 18 h. Purification by flash chromatography on silica gel (EtOAc/hexane, 1 : 19 v/v) afford product **38** (41 mg, 90%) as a colorless solid.

**From *N,N,N,3,5*-pentamethylbenzenaminium iodide with 420 nm LED light:** The general procedure GP1 was followed with *N,N,N,3,5*-pentamethylbenzenaminium iodide (58 mg, 0.2 mmol), B<sub>2</sub>pin<sub>2</sub> (152 mg, 0.6 mmol, 3.0 equiv.), Cs<sub>2</sub>CO<sub>3</sub> (197 mg, 0.6 mmol, 3.0 equiv.), **PTH1** (2.0 mg, 0.01 mmol, 5 mol%) and CH<sub>3</sub>CN (2 mL). The mixture was irradiated with a 420 nm LED light for 18 h. Purification by flash chromatography on silica gel (EtOAc/hexane, 1 : 19 v/v) afford product **38** (36 mg, 78%) as a colorless solid.

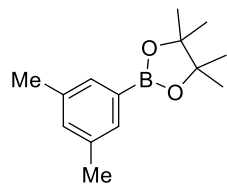

M.p.: 82–85 °C. –  $^1\text{H}$  NMR (500 MHz,  $\text{CDCl}_3$ ): 7.45 (2 H, s), 7.11 (1 H, s), 2.33 (6 H, s), 1.35 (12 H, s) ppm. –  $^{13}\text{C}$  NMR (125 MHz,  $\text{CDCl}_3$ ): 137.3, 133.1, 132.5, 83.8, 25.0, 21.3 ppm. –  $^{11}\text{B}$  NMR (160.4 Hz,  $\text{CDCl}_3$ ): 31.3 ppm.

– IR: 3022, 2991, 2976, 2921, 1738, 1600, 1357, 1318, 1260, 1240, 1209, 1139, 1116, 964  $\text{cm}^{-1}$ .

### 2-(4-(Difluoromethoxy)phenyl)-4,4,5,5-tetramethyl-1,3,2-dioxaborolane (**39**)<sup>[26]</sup>

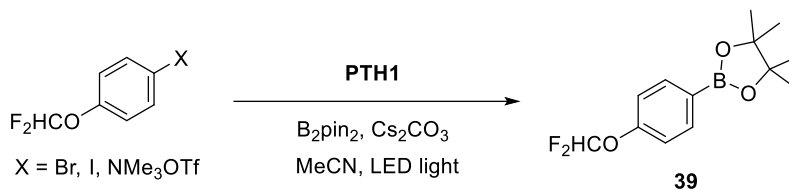

**From 1-(difluoromethoxy)-4-iodobenzene:** The general procedure GP1 was followed with 1-(difluoromethoxy)-4-iodobenzene (54 mg, 0.2 mmol),  $\text{B}_2\text{pin}_2$  (101 mg, 0.4 mmol, 2.0 equiv.),  $\text{Cs}_2\text{CO}_3$  (132 mg, 0.4 mmol, 2.0 equiv.), **PTH1** (0.08 mg, 0.004 mmol, 0.2 mol%) and  $\text{CH}_3\text{CN}$  (2 mL). The mixture was irradiated with a 400 nm LED light for 24 h. Purification by flash chromatography on silica gel (EtOAc/hexane, 1 : 15 v/v) afford product **39** (48 mg, 88%) as a colorless oil.

**From 1-(difluoromethoxy)-4-iodobenzene with 1.2 equiv. of  $\text{B}_2\text{pin}_2$ :** The general procedure GP1 was followed with 1-(difluoromethoxy)-4-iodobenzene (54 mg, 0.2 mmol),  $\text{B}_2\text{pin}_2$  (61 mg, 0.24 mmol, 1.2 equiv.),  $\text{Cs}_2\text{CO}_3$  (132 mg, 0.4 mmol, 2.0 equiv.), **PTH1** (0.08 mg, 0.004 mmol, 0.2 mol%) and  $\text{CH}_3\text{CN}$  (2 mL). The mixture was irradiated with a 400 nm LED light for 24 h. Purification by flash chromatography on silica gel (EtOAc/hexane, 1 : 15 v/v) afford product **39** (43 mg, 80%) as a colorless oil.

**From 1-(difluoromethoxy)-4-iodobenzene at 420 nm wavelength:** The general procedure GP1 was followed with 1-(difluoromethoxy)-4-iodobenzene (54 mg, 0.2 mmol),  $\text{B}_2\text{pin}_2$  (151 mg, 0.6 mmol, 3.0 equiv.),  $\text{Cs}_2\text{CO}_3$  (132 mg, 0.4 mmol, 2.0 equiv.), **PTH1** (0.8 mg, 0.04 mmol, 2 mol%) and  $\text{CH}_3\text{CN}$  (2 mL). The mixture was irradiated with a 420 nm

LED light for 24 h. Purification by flash chromatography on silica gel (EtOAc/hexane, 1 : 15 v/v) afford product **39** (46 mg, 85%) as a colorless oil.

**From 1-bromo-4-(difluoromethoxy)benzene:** The general procedure GP1 was followed with 1-bromo-4-(difluoromethoxy)benzene (45 mg, 0.2 mmol), B<sub>2</sub>pin<sub>2</sub> (101 mg, 0.4 mmol, 2.0 equiv.), Cs<sub>2</sub>CO<sub>3</sub> (132 mg, 0.4 mmol, 2.0 equiv.), **PTH1** (0.8 mg, 0.004 mmol, 2 mol%) and CH<sub>3</sub>CN (2 mL). The mixture was irradiated with a 400 nm LED light for 48 h. Purification by flash chromatography on silica gel (EtOAc/hexane, 1 : 15 v/v) afford product **39** (49 mg, 90%) as a colorless oil.

**From 4-(difluoromethoxy)aniline:** The general procedure GP6 was followed with 4-(difluoromethoxy)aniline (32 mg, 0.2 mmol), Cs<sub>2</sub>CO<sub>3</sub> (132 mg, 0.4 mmol, 2 equiv.), methyl trifluoromethanesulfonate (105 mg, 0.64 mmol, 3.2 equiv.) and CH<sub>3</sub>CN (1.5 mL). The mixture was stirred for 20 minutes at room temperature before adding B<sub>2</sub>pin<sub>2</sub> (152 mg, 0.6 mmol, 3 equiv.), Cs<sub>2</sub>CO<sub>3</sub> (165 mg, 0.5 mmol, 2.5 equiv.), **PTH1** (2.0 mg, 0.01 mmol, 5 mol%) and CH<sub>3</sub>CN (0.5 mL). The mixture was irradiated with a 400 nm LED light for 18 h. Purification by flash chromatography on silica gel (EtOAc/hexane, 1 : 15 v/v) afford product **39** (39 mg, 72%) as a colorless oil.

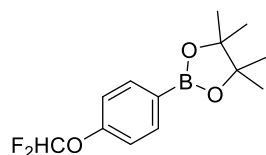

<sup>1</sup>H NMR (500 MHz, CDCl<sub>3</sub>): 7.82 (2 H, d, *J* = 8.5 Hz), 7.10 (2 H, d, *J* = 8.5 Hz), 6.54 (1 H, t, *J* = 73.9 Hz), 1.34 (12 H, s) ppm. – <sup>13</sup>C NMR (125 MHz, CDCl<sub>3</sub>): 153.9, 136.8, 118.4, 115.9 (t, *J* = 259.3 Hz), 84.1, 25.0 ppm. – <sup>11</sup>B NMR (160.4 Hz, CDCl<sub>3</sub>): 30.6 ppm. – <sup>19</sup>F NMR (470.5 Hz, CDCl<sub>3</sub>): –80.9 (d, *J* = 74.0 Hz) ppm. – IR: 2979, 1606, 1578, 1469, 1399, 1358, 1323, 1270, 1215, 1163, 1127, 1085, 1046 cm<sup>-1</sup>.

#### 4,4,5,5-Tetramethyl-2-(3-(trifluoromethoxy)phenyl)-1,3,2-dioxaborolane (**40**)<sup>[27]</sup>

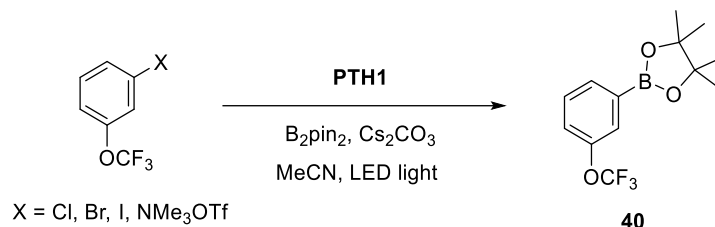

**From 1-iodo-3-(trifluoromethoxy)benzene:** The general procedure GP1 was followed with 1-iodo-3-(trifluoromethoxy)benzene (58 mg, 0.2 mmol), B<sub>2</sub>pin<sub>2</sub> (101 mg, 0.4 mmol, 2.0 equiv.), Cs<sub>2</sub>CO<sub>3</sub> (132 mg, 0.4 mmol, 2.0 equiv.), **PTH1** (0.08 mg, 0.0004 mmol, 0.2 mol%) and CH<sub>3</sub>CN (2 mL). The mixture was irradiated with a 400 nm LED light for 16 h. Purification by flash chromatography on silica gel (EtOAc/hexane, 1 : 15 v/v) afford product **40** (49 mg, 84%) as a colorless oil.

**From 1-bromo-3-(trifluoromethoxy)benzene:** The general procedure GP1 was followed with 1-bromo-3-(trifluoromethoxy)benzene (48 mg, 0.2 mmol), B<sub>2</sub>pin<sub>2</sub> (101 mg, 0.4 mmol, 2.0 equiv.), Cs<sub>2</sub>CO<sub>3</sub> (132 mg, 0.4 mmol, 2.0 equiv.), **PTH1** (0.4 mg, 0.002 mmol, 1 mol%) and CH<sub>3</sub>CN (2 mL). The mixture was irradiated with a 400 nm LED light for 24 h. Purification by flash chromatography on silica gel (EtOAc/hexane, 1 : 15 v/v) afford product **40** (49 mg, 85%) as a colorless oil.

**From 1-chloro-3-(trifluoromethoxy)benzene:** The general procedure GP1 was followed with 1-bromo-3-(trifluoromethoxy)benzene (39 mg, 0.2 mmol), B<sub>2</sub>pin<sub>2</sub> (101 mg, 0.4 mmol, 2.0 equiv.), Cs<sub>2</sub>CO<sub>3</sub> (132 mg, 0.4 mmol, 2.0 equiv.), **PTH1** (0.8 mg, 0.004 mmol, 2 mol%) and CH<sub>3</sub>CN (2 mL). The mixture was irradiated with a 400 nm LED light for 48 h. Purification by flash chromatography on silica gel (EtOAc/hexane, 1 : 15 v/v) afford product **40** (41 mg, 70%) as a colorless oil.

**From 3-(trifluoromethoxy)aniline:** The general procedure GP6 was followed with 3-(trifluoromethoxy)aniline (36 mg, 0.2 mmol), Cs<sub>2</sub>CO<sub>3</sub> (132 mg, 0.4 mmol, 2 equiv.), methyl trifluoromethanesulfonate (105 mg, 0.64 mmol, 3.2 equiv.) and CH<sub>3</sub>CN (1.5 mL). The

mixture was stirred for 20 minutes at room temperature before adding B<sub>2</sub>pin<sub>2</sub> (152 mg, 0.6 mmol, 3 equiv.), Cs<sub>2</sub>CO<sub>3</sub> (165 mg, 0.5 mmol, 2.5 equiv.), **PTH1** (2.0 mg, 0.01 mmol, 5 mol%) and CH<sub>3</sub>CN (0.5 mL). The mixture was irradiated with a 400 nm LED light for 18 h. Purification by flash chromatography on silica gel (EtOAc/hexane, 1 : 15 v/v) afford product **40** (42 mg, 73%) as a colorless oil.

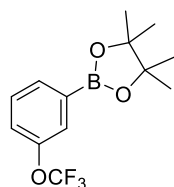

<sup>1</sup>H NMR (500 MHz, CDCl<sub>3</sub>): 7.73 (1 H, d, *J* = 7.3 Hz), 7.64 (1 H, s), 7.40 (1 H, t, *J* = 7.8 Hz), 7.30 (1 H, d, *J* = 8.2 Hz), 1.35 (12 H, s) ppm. – <sup>13</sup>C NMR (125 MHz, CDCl<sub>3</sub>): 149.1, 133.2, 129.4, 127.0, 123.9, 120.7 (q, *J* = 256.6 Hz), 84.4, 25.0 ppm. – <sup>11</sup>B NMR (160.4 Hz, CDCl<sub>3</sub>): 30.8 ppm. – <sup>19</sup>F NMR (470.5 Hz, CDCl<sub>3</sub>): –57.7 ppm. – IR: 2980, 1715, 1578, 1428, 1355, 1327, 129, 1158, 1141, 1097, 1071, 1002 cm<sup>-1</sup>.

#### 4,4,5,5-Tetramethyl-2-(3-(trifluoromethyl)phenyl)-1,3,2-dioxaborolane (**41**)<sup>[28]</sup>

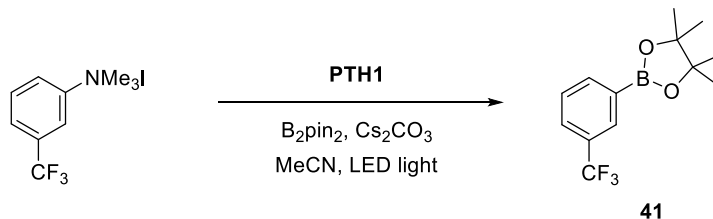

The general procedure GP1 was followed with N,N,N-trimethyl-3-(trifluoromethyl)benzenaminium iodide (66 mg, 0.2 mmol), B<sub>2</sub>pin<sub>2</sub> (152 mg, 0.6 mmol, 3.0 equiv.), Cs<sub>2</sub>CO<sub>3</sub> (197 mg, 0.6 mmol, 3.0 equiv.), **PTH1** (2.0 mg, 0.01 mmol, 5 mol%) and CH<sub>3</sub>CN (2 mL). The mixture was irradiated with a 400 nm LED light for 18 h. Purification by flash chromatography on silica gel (EtOAc/hexane, 1 : 19 v/v) afford product **41** (39 mg, 73%) as a colorless oil.

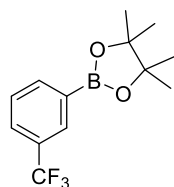

<sup>1</sup>H NMR (500 MHz, CDCl<sub>3</sub>): 8.07 (1 H, s), 7.98 (1 H, d, *J* = 7.4 Hz), 7.70 (1 H, d, *J* = 7.8 Hz), 7.48 (1 H, t, *J* = 7.6 Hz), 1.36 (12 H, s) ppm. – <sup>13</sup>C NMR (125 MHz, CDCl<sub>3</sub>): 138.1, 131.5 (q, *J* = 3.5 Hz), 130.2 (q, *J* = 32.3 Hz), 128.2, 127.9 (q, *J* = 3.5 Hz), 124.4 (q, *J* = 271.9 Hz), 84.4, 25.0 ppm. – <sup>11</sup>B NMR (160.4 Hz, CDCl<sub>3</sub>): 30.6



ppm. –  $^{19}\text{F}$  NMR (470.5 Hz,  $\text{CDCl}_3$ ): -62.6 ppm. – IR: 2979, 2255, 1977, 1739, 1521, 1400, 1362, 1321, 1274, 1242, 1209, 1160, 1141, 1098, 1017  $\text{cm}^{-1}$ .

### Methyl 4-(4,4,5,5-tetramethyl-1,3,2-dioxaborolan-2-yl)benzoate (**42**)<sup>[15]</sup>

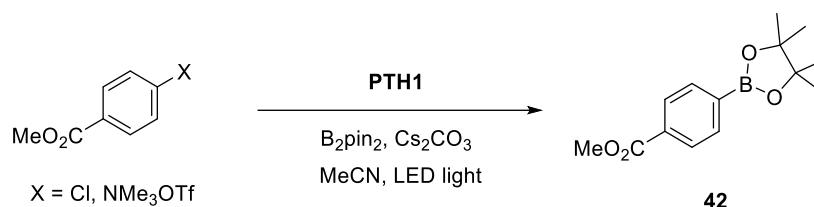

**From methyl 4-chlorobenzoate:** The general procedure GP1 was followed with methyl 4-chlorobenzoate (34 mg, 0.2 mmol),  $\text{B}_2\text{pin}_2$  (101 mg, 0.4 mmol, 2.0 equiv.),  $\text{Cs}_2\text{CO}_3$  (132 mg, 0.4 mmol, 2.0 equiv.), **PTH1** (0.8 mg, 0.004 mmol, 2 mol%) and  $\text{CH}_3\text{CN}$  (2 mL). The mixture was irradiated with a 400 nm LED light for 48 h. Purification by flash chromatography on silica gel (EtOAc/hexane, 1 : 15 v/v) afford product **42** (46 mg, 88%) as a colorless oil.

**From methyl 4-(dimethylamino)benzoate:** The general procedure GP6 was followed with methyl 4-(dimethylamino)benzoate (36 mg, 0.2 mmol), methyl trifluoromethanesulfonate (40 mg, 0.24 mmol, 1.2 equiv.) and  $\text{CH}_3\text{CN}$  (1.5 mL). The mixture was stirred for 20 minutes at room temperature before adding  $\text{B}_2\text{pin}_2$  (152 mg, 0.6 mmol, 3 equiv.),  $\text{Cs}_2\text{CO}_3$  (197 mg, 0.3 mmol, 3 equiv.), **PTH1** (2.0 mg, 0.01 mmol, 5 mol%) and  $\text{CH}_3\text{CN}$  (0.5 mL). The mixture was irradiated with a 400 nm LED light for 18 h. Purification by flash chromatography on silica gel (EtOAc/hexane, 1 : 15 v/v) afford product **42** (43 mg, 82%) as a colorless oil.

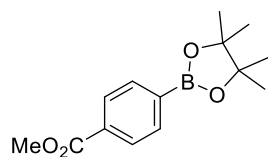

$^1\text{H}$  NMR (500 MHz,  $\text{CDCl}_3$ ): 8.02 (2 H, d,  $J = 8.2$  Hz), 7.86 (2 H, d,  $J = 8.1$  Hz), 3.91 (3 H, s), 1.35 (12 H, s) ppm. –  $^{13}\text{C}$  NMR (125 MHz,  $\text{CDCl}_3$ ): 167.2, 134.8, 132.3, 128.7, 84.3, 52.3, 25.0 ppm. –  $^{11}\text{B}$  NMR

(160.4 Hz, CDCl<sub>3</sub>): 30.9 ppm. – IR: 2984, 1721, 1561, 1507, 1434, 1359, 1325, 1311, 1275, 1253, 1209, 1190, 1140, 1109, 1097, 1086 cm<sup>-1</sup>.

**Trifluoro(3-(methylsulfonyl)phenyl)-λ<sup>4</sup>-borane, potassium salt (43)**<sup>[29]</sup>

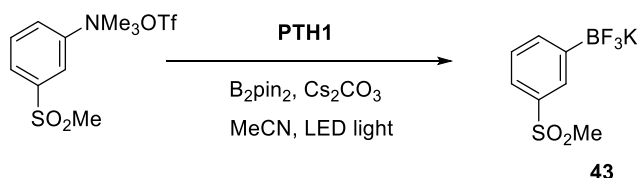

The general procedure GP1 was followed with *N,N,N*-trimethyl-3-(methylsulfonyl)benzenaminium trifluoromethanesulfonate (73 mg, 0.2 mmol), B<sub>2</sub>pin<sub>2</sub> (152 mg, 0.6 mmol, 3.0 equiv.), Cs<sub>2</sub>CO<sub>3</sub> (197 mg, 0.6 mmol, 3.0 equiv.), **PTH1** (2.0 mg, 0.01 mmol, 5 mol%) and CH<sub>3</sub>CN (2 mL). The mixture was irradiated with a 400 nm LED light for 18 h. The crude mixture was diluted in EtOAc (5 mL) and H<sub>2</sub>O (0.5 mL) and added 2-iodoxybenzoic acid (168 mg, 0.6 mmol, 3 equiv.). After heating at 80 °C for 2 h, solid precipitated from the solution was filter off. The filtrate was extracted with saturated NaHCO<sub>3</sub>, brine, filter and concentrated then followed by treatment with KHF<sub>2</sub> according to GP3 afforded organotrifluoroborate salt **43** (36 mg, 68%) as a colorless solid.

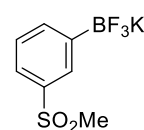 M.p.: > 200 °C. – <sup>1</sup>H NMR (500 MHz, (CD<sub>3</sub>)<sub>2</sub>CO): 7.93 (1 H, s), 7.67 (1 H, d, *J* = 7.2 Hz), 7.52 (1 H, d, *J* = 7.7 Hz), 7.24 (1 H, t, *J* = 7.5 Hz), 2.89 (3 H, s) ppm. – <sup>13</sup>C NMR (125 MHz, (CD<sub>3</sub>)<sub>2</sub>CO): 140.1, 137.6, 130.7, 127.8, 124.7, 44.6 ppm. – <sup>11</sup>B NMR (160.4 Hz, (CD<sub>3</sub>)<sub>2</sub>CO): 3.0 (q, *J* = 48.0, 47.6 Hz) ppm. – <sup>19</sup>F NMR (470.5 Hz, (CD<sub>3</sub>)<sub>2</sub>CO): -143.5 (dd, *J* = 93.3, 37.1 Hz) ppm. – IR: 3405, 1635, 4121, 1399, 1284, 1215, 1138, 1088, 974, 904 cm<sup>-1</sup>. – HRMS: calcd for C<sub>7</sub>H<sub>7</sub>BF<sub>3</sub>O<sub>2</sub>S: 223.0217, found 223.0224 [M+H<sup>+</sup>].

#### 4-(4,4,5,5-Tetramethyl-1,3,2-dioxaborolan-2-yl)-1*H*-indole (44)<sup>[30]</sup>

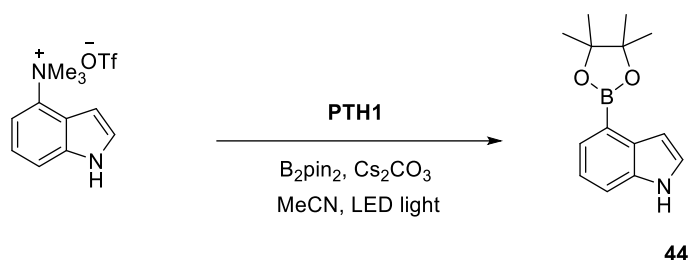

The general procedure GP1 was followed with *N,N,N*-trimethyl-1*H*-indol-4-aminium trifluoromethanesulfonate (65 mg, 0.2 mmol), B<sub>2</sub>pin<sub>2</sub> (152 mg, 0.6 mmol, 3.0 equiv.), Cs<sub>2</sub>CO<sub>3</sub> (197 mg, 0.6 mmol, 3.0 equiv.), **PTH1** (4.0 mg, 0.02 mmol, 10 mol%) and CH<sub>3</sub>CN (2.5 mL). The mixture was irradiated with a 400 nm LED light for 18 h. Purification by Prep TLC (EtOAc/hexane, 1 : 5 v/v) afford product **44** (40 mg, 82%) as a colorless solid.

M.p.: 139–141 °C. – <sup>1</sup>H NMR (500 MHz, CDCl<sub>3</sub>): 8.19 (1 H, s), 7.66 (1 H, d, *J* = 7.0 Hz), 7.50 (1 H, d, *J* = 8.1 Hz), 7.27–7.24 (1 H, m), 7.22 (1 H, dd, *J* = 8.1, 7.1 Hz), 7.07 (1 H, s), 1.41 (12 H, s) ppm. – <sup>13</sup>C NMR (125 MHz, CDCl<sub>3</sub>): 135.3, 132.7, 128.0, 124.7, 121.5, 114.1, 104.7, 83.5, 25.1 ppm. – <sup>11</sup>B NMR (160.4 Hz, CDCl<sub>3</sub>): 31.4 ppm. – IR: 2979, 2926, 1608, 1575, 1507, 1407, 1374, 1338, 1290, 1269, 1167, 1133, 1066, 970, 896 cm<sup>-1</sup>.

#### Indolin-1-yl(4-(trifluoro-λ<sup>4</sup>-boraneryl)phenyl)methanone, potassium salt (45)

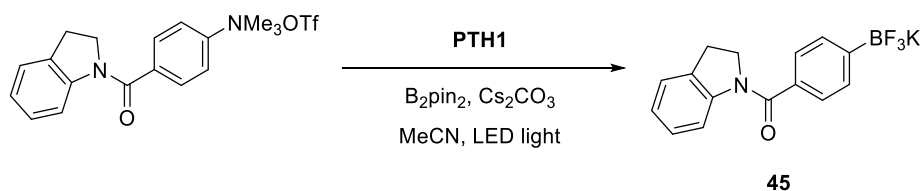

The general procedure GP1 was followed with 4-(indoline-1-carbonyl)-*N,N,N*-trimethylbenzenaminium trifluoromethanesulfonate (86 mg, 0.2 mmol), B<sub>2</sub>pin<sub>2</sub> (152 mg, 0.6 mmol, 3.0 equiv.), Cs<sub>2</sub>CO<sub>3</sub> (197 mg, 0.6 mmol, 3.0 equiv.), **PTH1** (4.0 mg, 0.02 mmol,

10 mol%) and CH<sub>3</sub>CN (2.5 mL). The mixture was irradiated with a 400 nm LED light for 18 h. Purification by Prep TLC (EtOAc/hexane, 1 : 6 v/v) then followed by treatment with KHF<sub>2</sub> according to GP3 afforded organotrifluoroborate salt **45** (50 mg, 76%) as a colorless solid.

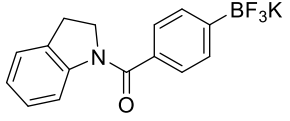 M.p.: > 200 °C. – <sup>1</sup>H NMR (500 MHz, CD<sub>3</sub>CN): 7.69 (1 H, s), 7.53 (2 H, d, *J* = 7.8 Hz), 7.35 (2 H, d, *J* = 7.6 Hz), 7.24 (1 H, d, *J* = 7.4 Hz), 7.13 (1 H, s), 7.00 (1 H, t, *J* = 7.3 Hz), 4.03 (2 H, t, *J* = 8.3 Hz), 3.07 (2 H, t, *J* = 8.3 Hz) ppm. – <sup>13</sup>C NMR (125 MHz, CD<sub>3</sub>CN): 171.0, 144.3, 135.4, 133.9, 132.2, 127.7, 126.1, 125.8, 124.3, 51.5, 28.7 ppm. – <sup>11</sup>B NMR (160.4 Hz, CD<sub>3</sub>CN): 3.0 ppm. – <sup>19</sup>F NMR (470.5 Hz, CD<sub>3</sub>CN): –142.7 ppm. – IR: 3365, 1747, 1628, 1587, 1523, 1503, 1485, 1463, 1404, 1303, 1228, 1021, 973 cm<sup>-1</sup>. – HRMS: calcd for C<sub>15</sub>H<sub>12</sub>BF<sub>3</sub>NO: 290.0970, found 290.0964 [M–K<sup>+</sup>].

#### N-(Thiophen-2-ylmethyl)-4-(trifluoro-λ<sup>4</sup>-boraneyl)benzamide, potassium salt (**46**)

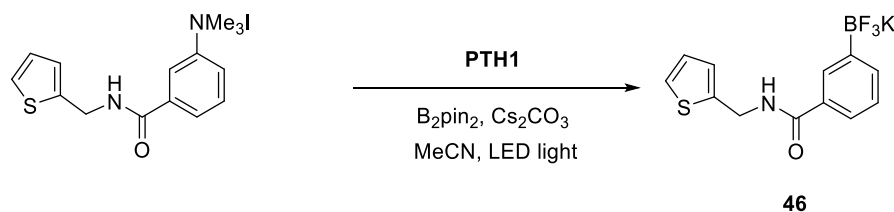

The general procedure GP1 was followed with 4-(indoline-1-carbonyl)-*N,N,N*-trimethylbenzenaminium iodide (80 mg, 0.2 mmol), B<sub>2</sub>pin<sub>2</sub> (152 mg, 0.6 mmol, 3.0 equiv.), Cs<sub>2</sub>CO<sub>3</sub> (197 mg, 0.6 mmol, 3.0 equiv.), **PTH1** (4.0 mg, 0.02 mmol, 10 mol%) and CH<sub>3</sub>CN (2.5 mL). The mixture was irradiated with a 400 nm LED light for 18 h. Purification by rapid column chromatography then followed by treatment with KHF<sub>2</sub> according to GP3 afforded organotrifluoroborate salt **46** (47 mg, 73%) as a colorless solid.

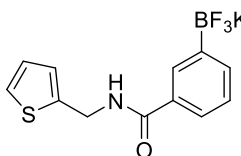 M.p.: > 200 °C. – <sup>1</sup>H NMR (500 MHz, CD<sub>3</sub>CN): 7.89 (1 H, s), 7.63–7.57 (3 H, m), 7.31–7.23 (2 H, m), 7.00 (1 H, d, *J* = 4.3 Hz), 6.94 (1 H, dd, *J* = 5.1, 3.5 Hz), 4.67 (2 H, d, *J* = 6.1 Hz) ppm. – <sup>13</sup>C NMR (125 MHz,

CD<sub>3</sub>CN): 169.1, 143.9, 135.6, 133.4, 130.5, 127.7, 127.6, 126.2, 125.6, 38.7 ppm. – <sup>11</sup>B NMR (160.4 Hz, CD<sub>3</sub>CN): 3.4 ppm. – <sup>19</sup>F NMR (470.5 Hz, CD<sub>3</sub>CN): –142.6 ppm. – IR: 3336, 1626, 1540, 1482, 1366, 1297, 1216, 1135, 1023, 963 cm<sup>-1</sup>. – HRMS: calcd for C<sub>12</sub>H<sub>10</sub>BF<sub>3</sub>NOS: 284.0534, found 284.0528 [M–K<sup>+</sup>].

### 3-Ethyl-3-(4-(4,4,5,5-tetramethyl-1,3,2-dioxaborolan-2-yl)phenyl)piperidine-2,6-dione

(47)

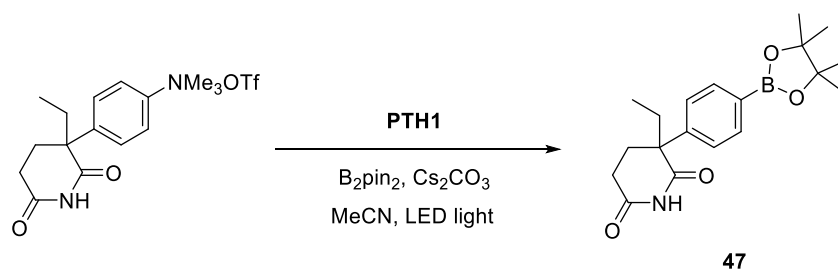

The general procedure GP1 was followed with 4-(3-ethyl-2,6-dioxopiperidin-3-yl)-*N,N,N*-trimethylbenzenaminium trifluoromethanesulfonate (83 mg, 0.2 mmol), B<sub>2</sub>pin<sub>2</sub> (152 mg, 0.6 mmol, 3.0 equiv.), Cs<sub>2</sub>CO<sub>3</sub> (197 mg, 0.6 mmol, 3.0 equiv.), **PTH1** (4.0 mg, 0.02 mmol, 10 mol%) and CH<sub>3</sub>CN (2.5 mL). The mixture was irradiated with a 400 nm LED light for 18 h. Purification by Prep TLC (EtOAc/hexane, 1 : 3 v/v) afford product **47** (56 mg, 84%) as a colorless solid.

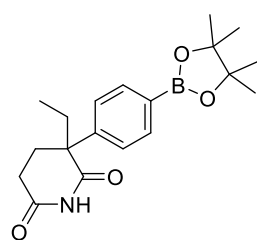

M.p.: 165–168 °C. – <sup>1</sup>H NMR (500 MHz, CDCl<sub>3</sub>): 7.94 (1 H, s), 7.80 (2 H, d, *J* = 8.3 Hz), 7.28 (2 H, d, *J* = 8.3 Hz), 2.65–2.51 (1 H, m), 2.44–2.30 (2 H, m), 2.22 (1 H, td, *J* = 15.3, 14.3, 4.2 Hz), 2.06 (1 H, dq, *J* = 14.8, 7.4 Hz), 1.92 (1 H, dq, *J* = 14.7, 7.4 Hz), 1.34 (12 H, s), 0.87 (3 H, t, *J* = 7.4 Hz) ppm. – <sup>13</sup>C NMR (125 MHz, CDCl<sub>3</sub>): 175.1, 172.3, 142.0, 135.6, 125.6, 84.1, 51.5, 32.9, 29.4, 27.2, 25.0, 9.2 ppm. – <sup>11</sup>B NMR (160.4 Hz, CDCl<sub>3</sub>): 31.2 ppm. – IR: 2974, 1698, 1609, 1558, 1458, 1399, 1359, 1326, 1307, 1264, 1189, 1142, 1095, 1019, 962 cm<sup>-1</sup>. – HRMS: calcd for C<sub>19</sub>H<sub>27</sub>BNO<sub>4</sub>: 344.2028, found 344.2017 [M+H<sup>+</sup>].

### (3-((Dimethylcarbamoyl)oxy)phenyl)boronic acid (48)

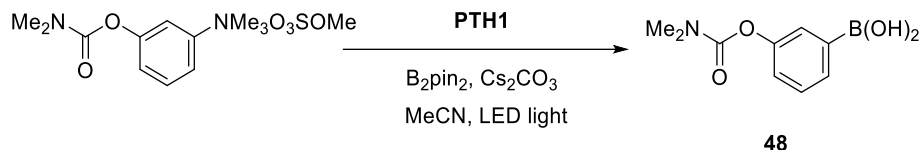

The general procedure GP1 was followed with 3-((dimethylcarbamoyl)oxy)-N,N,N-trimethylbenzenaminium methyl sulfate (67 mg, 0.2 mmol), B<sub>2</sub>pin<sub>2</sub> (152 mg, 0.6 mmol, 3.0 equiv.), Cs<sub>2</sub>CO<sub>3</sub> (197 mg, 0.6 mmol, 3.0 equiv.), **PTH1** (4.0 mg, 0.02 mmol, 10 mol%) and CH<sub>3</sub>CN (2.5 mL). The mixture was irradiated with a 400 nm LED light for 18 h. Purification by GP4 afforded boronic acid 48 (31 mg, 74%) as a colorless oil.

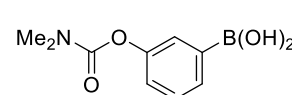 <sup>1</sup>H NMR (500 MHz, CD<sub>3</sub>OD): 7.41 (1 H, s), 7.21 (2 H, s), 6.84 (1 H, s), 3.12 (3 H, s), 2.98 (3 H, s) ppm. – <sup>13</sup>C NMR (125 MHz, CD<sub>3</sub>OD): 157.4, 152.0, 131.3, 128.4, 126.8, 119.4, 36.8, 36.7 ppm. – <sup>11</sup>B NMR (160.4 Hz, CD<sub>3</sub>OD): 6.4 ppm. – IR: 3362, 2518, 1640, 1449, 1397, 1315, 1206, 1079, 917 cm<sup>-1</sup>. – HRMS: calcd for C<sub>9</sub>H<sub>13</sub>BNO<sub>4</sub>: 210.0932, found 210.0932 [M+H<sup>+</sup>].

### 2-(2,3-Dimethylphenyl)-4,4,5,5-tetramethyl-1,3,2-dioxaborolane (49)<sup>[20]</sup>

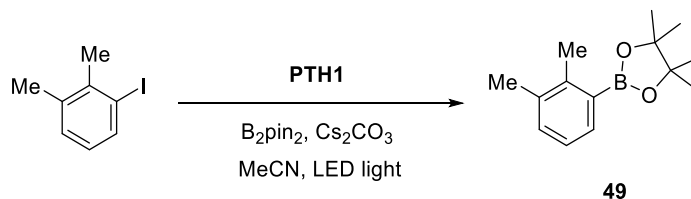

The general procedure GP1 was followed with 1-iodo-2,3-dimethylbenzene (46 mg, 0.2 mmol), B<sub>2</sub>pin<sub>2</sub> (101 mg, 0.4 mmol, 2.0 equiv.), Cs<sub>2</sub>CO<sub>3</sub> (132 mg, 0.4 mmol, 2.0 equiv.), **PTH1** (0.4 mg, 0.002 mmol, 1 mol%) and CH<sub>3</sub>CN (2 mL). The mixture was irradiated with a 400

nm LED light for 24 h. Purification by flash chromatography on silica gel (EtOAc/hexane, 1 : 19 v/v) afford product **49** (36 mg, 78%) as a colorless oil.

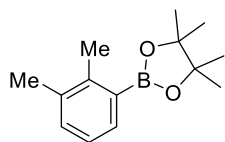

$^1\text{H}$  NMR (500 MHz,  $\text{CDCl}_3$ ): 7.63 (1 H, d,  $J = 7.4$  Hz), 7.23 (1 H, d,  $J = 7.3$  Hz), 7.11 (1 H, t,  $J = 7.4$  Hz), 2.49 (3 H, s), 2.29 (3 H, s), 1.37 (12 H, s) ppm.

–  $^{13}\text{C}$  NMR (125 MHz,  $\text{CDCl}_3$ ): 143.2, 136.6, 133.6, 132.4, 125.0, 83.6, 25.0,

20.6, 18.6 ppm. –  $^{11}\text{B}$  NMR (160.4 Hz,  $\text{CDCl}_3$ ): 31.6 ppm. – IR: 2976, 2929, 1587, 1427, 1346, 1302, 1272, 1245, 1214, 1136, 1111, 1081, 1032  $\text{cm}^{-1}$ .

### 2-(2,4-Dimethylphenyl)-4,4,5,5-tetramethyl-1,3,2-dioxaborolane (**50**)<sup>[25]</sup>

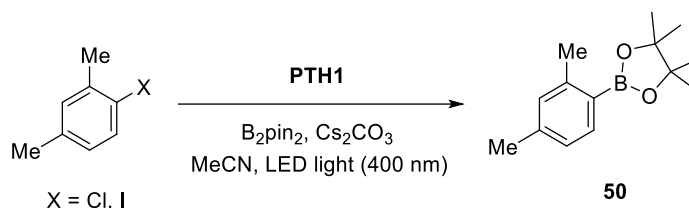

**From 1-iodo-2,4-dimethylbenzene:** The general procedure GP1 was followed with 1-iodo-2,4-dimethylbenzene (46 mg, 0.2 mmol),  $\text{B}_2\text{pin}_2$  (101 mg, 0.4 mmol, 2.0 equiv.),  $\text{Cs}_2\text{CO}_3$  (132 mg, 0.4 mmol, 2.0 equiv.), **PTH1** (0.4 mg, 0.002 mmol, 1 mol%) and  $\text{CH}_3\text{CN}$  (2 mL). The mixture was irradiated with a 400 nm LED light for 24 h. Purification by flash chromatography on silica gel (EtOAc/hexane, 1 : 19 v/v) afford product **50** (36 mg, 78%) as a colorless oil.

**From 1-chloro-2,4-dimethylbenzene:** The general procedure GP1 was followed with 1-chloro-2,4-dimethylbenzene (28 mg, 0.2 mmol),  $\text{B}_2\text{pin}_2$  (101 mg, 0.4 mmol, 2.0 equiv.),  $\text{Cs}_2\text{CO}_3$  (132 mg, 0.4 mmol, 2.0 equiv.), **PTH1** (2.0 mg, 0.01 mmol, 5 mol%) and  $\text{CH}_3\text{CN}$  (2 mL). The mixture was irradiated with a 400 nm LED light for 24 h. Purification by flash chromatography on silica gel (EtOAc/hexane, 1 : 19 v/v) afford product **50** (33 mg, 72%) as a colorless oil.

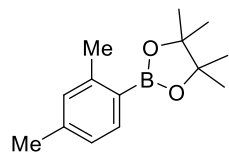

$^1\text{H}$  NMR (500 MHz,  $\text{CDCl}_3$ ): 7.67 (1 H, d,  $J = 7.4$  Hz), 7.04–6.96 (2 H, m), 2.52 (3 H, s), 2.32 (3 H, s), 1.34 (12 H, s) ppm. –  $^{13}\text{C}$  NMR (125 MHz,  $\text{CDCl}_3$ ): 145.1, 141.0, 136.2, 130.9, 125.7, 83.4, 25.0, 22.3, 21.6 ppm. –  $^{11}\text{B}$  NMR (160.4 Hz,  $\text{CDCl}_3$ ): 31.5 ppm. – IR: 2977, 1714, 1611, 1446, 1404, 1345, 1311, 1273, 1218, 1146, 1133, 1063  $\text{cm}^{-1}$ .

### 2-(2-Fluorophenyl)-4,4,5,5-tetramethyl-1,3,2-dioxaborolane (**51**)<sup>[19]</sup>

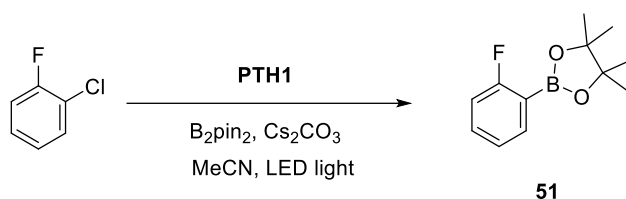

The general procedure GP1 was followed with 1-chloro-2-fluorobenzene (26 mg, 0.2 mmol),  $\text{B}_2\text{pin}_2$  (101 mg, 0.4 mmol, 2.0 equiv.),  $\text{Cs}_2\text{CO}_3$  (132 mg, 0.4 mmol, 2.0 equiv.), **PTH1** (2.0 mg, 0.01 mmol, 5 mol%) and  $\text{CH}_3\text{CN}$  (2 mL). The mixture was irradiated with a 400 nm LED light for 24 h. Purification by flash chromatography on silica gel (EtOAc/hexane, 1 : 19 v/v) afford product **51** (31 mg, 70%) as a colorless oil.

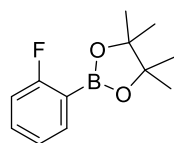

$^1\text{H}$  NMR (500 MHz,  $\text{CDCl}_3$ ): 7.74 (1 H, t,  $J = 6.7$  Hz), 7.50–7.33 (1 H, m), 7.13 (1 H, t,  $J = 7.4$  Hz), 7.02 (1 H, t,  $J = 8.9$  Hz), 1.36 (12 H, s) ppm. –  $^{13}\text{C}$  NMR (125 MHz,  $\text{CDCl}_3$ ): 167.3 (d,  $J = 250.7$  Hz), 137.0 (d,  $J = 8.1$  Hz), 133.4 (d,  $J = 8.7$  Hz), 123.7 (d,  $J = 3.4$  Hz), 115.4 (d,  $J = 24.0$  Hz), 84.0, 66.0, 25.0, 15.4 ppm. –  $^{11}\text{B}$  NMR (160.4 Hz,  $\text{CDCl}_3$ ): 30.3 ppm. –  $^{19}\text{F}$  NMR (470.5 Hz,  $\text{CDCl}_3$ ): 102.64 ppm. – IR: 2979, 1738, 1615, 1573, 1446, 1389, 1355, 1324, 1270, 1240, 1215, 1144, 1113, 1074, 1046, 1030  $\text{cm}^{-1}$ .



## 2-(4-Fluorophenyl)-4,4,5,5-tetramethyl-1,3,2-dioxaborolane (52)<sup>[15]</sup>

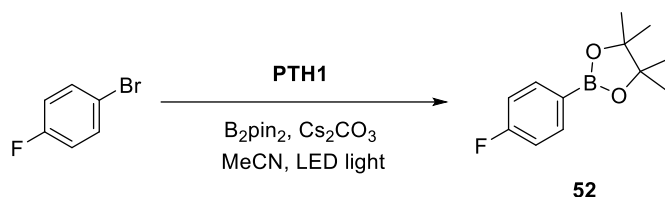

**At 400 nm wavelength:** The general procedure GP1 was followed with 1-bromo-4-fluorobenzene (35 mg, 0.2 mmol), B<sub>2</sub>pin<sub>2</sub> (101 mg, 0.4 mmol, 2.0 equiv.), Cs<sub>2</sub>CO<sub>3</sub> (132 mg, 0.4 mmol, 2.0 equiv.), PTH1 (2.0 mg, 0.01 mmol, 5 mol%) and CH<sub>3</sub>CN (2 mL). The mixture was irradiated with a 400 nm LED light for 24 h. Purification by flash chromatography on silica gel (EtOAc/hexane, 1 : 19 v/v) afford product **52** (40 mg, 90%) as a colorless oil.

**At 420 nm wavelength:** The general procedure GP1 was followed with 1-bromo-4-fluorobenzene (35 mg, 0.2 mmol), B<sub>2</sub>pin<sub>2</sub> (151 mg, 0.6 mmol, 3.0 equiv.), Cs<sub>2</sub>CO<sub>3</sub> (132 mg, 0.4 mmol, 2.0 equiv.), PTH1 (0.8 mg, 0.004 mmol, 2 mol%) and CH<sub>3</sub>CN (2 mL). The mixture was irradiated with a 400 nm LED light for 36 h. Purification by flash chromatography on silica gel (EtOAc/hexane, 1 : 19 v/v) afford product **52** (40 mg, 91%) as a colorless oil.

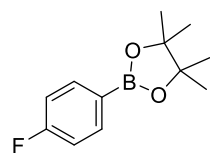

<sup>1</sup>H NMR (500 MHz, CDCl<sub>3</sub>): 7.80 (2 H, dd, *J* = 8.2, 6.3 Hz), 7.05 (2 H, t, *J* = 8.9 Hz), 1.34 (12 H, s) ppm. – <sup>13</sup>C NMR (125 MHz, CDCl<sub>3</sub>): 165.2 (d, *J* = 250.3 Hz), 137.1 (d, *J* = 8.4 Hz), 115.0 (d, *J* = 20.1 Hz), 84.0, 25.0 ppm. – <sup>11</sup>B NMR (160.4 Hz, CDCl<sub>3</sub>): 31.1 ppm. – <sup>19</sup>F NMR (470.5 Hz, CDCl<sub>3</sub>): –108.5 ppm. – IR: 2979, 1602, 1514, 1467, 1399, 1360, 1319, 1270, 1221, 1143, 1087, 1017, 962 cm<sup>-1</sup>.

## 2-(2-Fluoro-4-methylphenyl)-4,4,5,5-tetramethyl-1,3,2-dioxaborolane (53)<sup>[31]</sup>

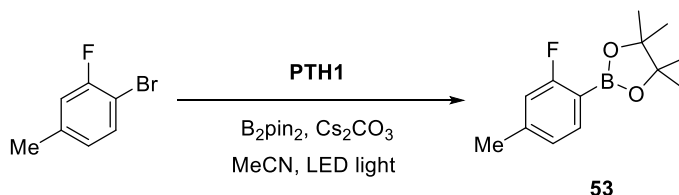

The general procedure GP1 was followed with 1-bromo-2-fluoro-4-methylbenzene (38 mg, 0.2 mmol), B<sub>2</sub>pin<sub>2</sub> (101 mg, 0.4 mmol, 2.0 equiv.), Cs<sub>2</sub>CO<sub>3</sub> (132 mg, 0.4 mmol, 2.0 equiv.), PTH1 (0.8 mg, 0.004 mmol, 2 mol%) and CH<sub>3</sub>CN (2 mL). The mixture was irradiated with a 400 nm LED light for 24 h. Purification by flash chromatography on silica gel (EtOAc/hexane, 1 : 19 v/v) afford product **53** (31 mg, 65%) as a colorless oil.

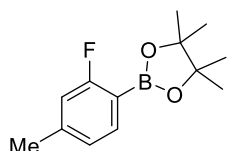

<sup>1</sup>H NMR (500 MHz, CDCl<sub>3</sub>): 7.62 (1 H, t, *J* = 7.0 Hz), 6.95 (1 H, d, *J* = 8.1 Hz), 6.85 (1 H, d, *J* = 10.4 Hz), 2.35 (3 H, s), 1.35 (12 H, s) ppm. – <sup>13</sup>C NMR (125 MHz, CDCl<sub>3</sub>): 167.5 (d, *J* = 250.4 Hz), 144.4 (d, *J* = 8.5 Hz), 136.8 (d, *J* = 8.9 Hz), 124.6 (d, *J* = 2.9 Hz), 116.0 (d, *J* = 23.8 Hz), 83.8, 25.0, 21.6 ppm. – <sup>11</sup>B NMR (160.4 Hz, CDCl<sub>3</sub>): 30.4 ppm. – <sup>19</sup>F NMR (470.5 Hz, CDCl<sub>3</sub>): –103.8 (dd, *J* = 10.4, 7.0 Hz) ppm. – IR: 2979, 2925, 1715, 1621, 1563, 1410, 1371, 1349, 1326, 1270, 1233, 1213, 1144, 1130, 1065 cm<sup>-1</sup>.

#### 4,4,5,5-Tetramethyl-2-(4-(trifluoromethyl)phenyl)-1,3,2-dioxaborolane (**54**)<sup>[32]</sup>

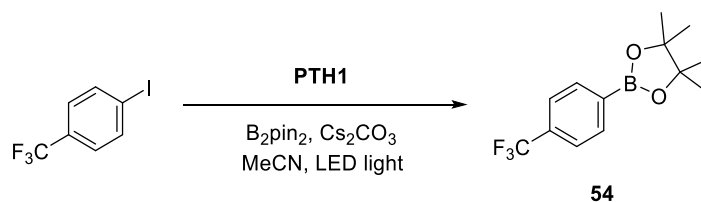

The general procedure GP1 was followed with 1-iodo-4-(trifluoromethyl)benzene (54 mg, 0.2 mmol), B<sub>2</sub>pin<sub>2</sub> (101 mg, 0.4 mmol, 2.0 equiv.), Cs<sub>2</sub>CO<sub>3</sub> (132 mg, 0.4 mmol, 2.0 equiv.), PTH1 (0.4 mg, 0.002 mmol, 1 mol%) and CH<sub>3</sub>CN (2 mL). The mixture was irradiated with a 400 nm LED light for 24 h. Purification by flash chromatography on silica gel (EtOAc/hexane, 1 : 19 v/v) afford product **54** (46 mg, 86%) as a colorless solid.

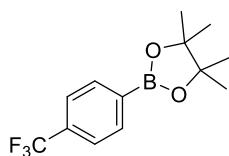

M.p.: 68–70 °C. – <sup>1</sup>H NMR (500 MHz, CDCl<sub>3</sub>): 7.91 (2 H, d, *J* = 7.8 Hz), 7.61 (2 H, d, *J* = 8.1 Hz), 1.36 (12 H, s) ppm. – <sup>13</sup>C NMR (125 MHz, CDCl<sub>3</sub>): 135.2, 133.0 (q, *J* = 32.1 Hz), 124.4 (q, *J* = 3.6 Hz), 124.3 (q, *J* =

272.3 Hz), 84.4, 25.0 ppm. –  $^{11}\text{B}$  NMR (160.4 Hz,  $\text{CDCl}_3$ ): 30.8 ppm. –  $^{19}\text{F}$  NMR (470.5 Hz,  $\text{CDCl}_3$ ): –63.0 ppm. – IR: 2979, 2254, 1974, 1739, 1520, 1401, 1362, 1320, 1272, 1242, 1213, 1158, 1140, 1096, 1017  $\text{cm}^{-1}$ .

#### 4,4,5,5-Tetramethyl-2-(2-methyl-3-(trifluoromethyl)phenyl)-1,3,2-dioxaborolane (**55**)

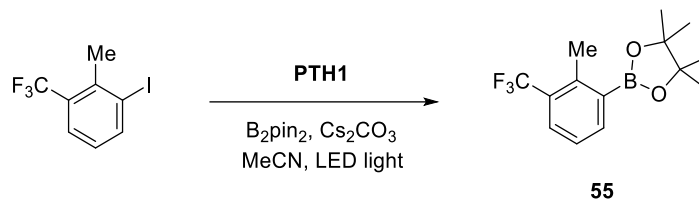

The general procedure GP1 was followed with 1-iodo-2-methyl-3-(trifluoromethyl)benzene (57 mg, 0.2 mmol),  $\text{B}_2\text{pin}_2$  (101 mg, 0.4 mmol, 2.0 equiv.),  $\text{Cs}_2\text{CO}_3$  (132 mg, 0.4 mmol, 2.0 equiv.), **PTH1** (0.2 mg, 0.001 mmol, 0.5 mol%) and  $\text{CH}_3\text{CN}$  (2 mL). The mixture was irradiated with a 400 nm LED light for 24 h. Purification by flash chromatography on silica gel (EtOAc/hexane, 1 : 19 v/v) afford product **55** (44 mg, 77%) as a colorless oil.

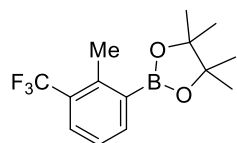

$^1\text{H}$  NMR (500 MHz,  $\text{CDCl}_3$ ): 7.92 (1 H, d,  $J = 7.5$  Hz), 7.69 (1 H, d,  $J = 7.8$  Hz), 7.26 (1 H, t,  $J = 7.7$  Hz), 2.70 (3 H, s), 1.38 (12 H, s) ppm. –  $^{13}\text{C}$  NMR (125 MHz,  $\text{CDCl}_3$ ): 134.3, 139.2, 129.1 (q,  $J = 28.9$  Hz), 128.2 (q,  $J = 6.2$  Hz), 125.0 (d,  $J = 274.1$  Hz), 124.9, 84.1, 25.0, 18.3 ppm. –  $^{11}\text{B}$  NMR (160.4 Hz,  $\text{CDCl}_3$ ): 31.4 ppm. –  $^{19}\text{F}$  NMR (470.5 Hz,  $\text{CDCl}_3$ ): –61.0 ppm. – IR: 2980, 1593, 1445, 1390, 1360, 1307, 1267, 1222, 1169, 1144, 1122, 1075, 1020, 963  $\text{cm}^{-1}$ . – HRMS: calcd for  $\text{C}_{14}\text{H}_{19}\text{BF}_3\text{O}_2$ : 287.1425, found 287.1423  $[\text{M}+\text{H}^+]$ .

### 2-(3-Fluoro-4-methoxyphenyl)-4,4,5,5-tetramethyl-1,3,2-dioxaborolane (56)<sup>[33]</sup>

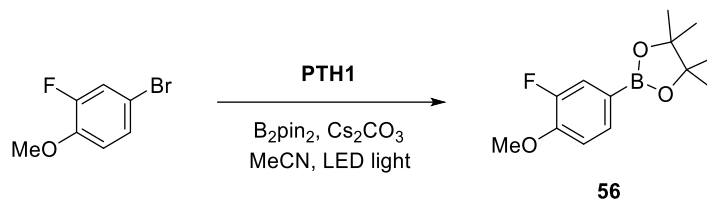

The general procedure GP1 was followed with 4-bromo-2-fluoro-1-methoxybenzene (41 mg, 0.2 mmol), B<sub>2</sub>pin<sub>2</sub> (101 mg, 0.4 mmol, 2.0 equiv.), Cs<sub>2</sub>CO<sub>3</sub> (132 mg, 0.4 mmol, 2.0 equiv.), **PTH1** (0.8 mg, 0.004 mmol, 2 mol%) and CH<sub>3</sub>CN (2 mL). The mixture was irradiated with a 400 nm LED light for 24 h. Purification by flash chromatography on silica gel (EtOAc/hexane, 1 : 19 v/v) afford product **56** (48 mg, 95%) as a colorless solid.

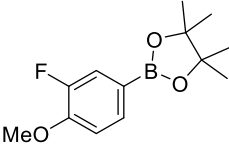

M.p.: 125–128 °C. – <sup>1</sup>H NMR (500 MHz, CDCl<sub>3</sub>): 7.53 (1 H, d, *J* = 8.1 Hz), 7.49 (1 H, d, *J* = 11.8 Hz), 6.94 (1 H, t, *J* = 8.1 Hz), 3.90 (3 H, s), 1.33 (12 H, s) ppm. – <sup>13</sup>C NMR (125 MHz, CDCl<sub>3</sub>): 152.2 (d, *J* = 246.1 Hz), 150.4 (d, *J* = 10.4 Hz), 131.6 (d, *J* = 3.7 Hz), 121.8 (d, *J* = 16.3 Hz), 112.7, 84.0, 56.2, 25.0 ppm. – <sup>11</sup>B NMR (160.4 Hz, CDCl<sub>3</sub>): 30.4 ppm. – <sup>19</sup>F NMR (470.5 Hz, CDCl<sub>3</sub>): -137.1 (dd, *J* = 11.8, 8.1 Hz) ppm. – IR: 2986, 1642, 1598, 1432, 1385, 1296, 1208, 1165, 1123 1037 cm<sup>-1</sup>.

### 2-(3-(Difluoromethoxy)phenyl)-4,4,5,5-tetramethyl-1,3,2-dioxaborolane (57)<sup>[34]</sup>

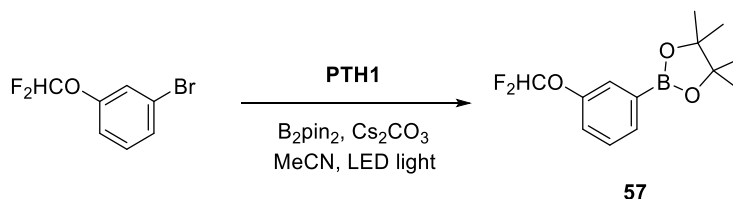

The general procedure GP1 was followed with 1-bromo-3-(difluoromethoxy)benzene (45 mg, 0.2 mmol), B<sub>2</sub>pin<sub>2</sub> (101 mg, 0.4 mmol, 2.0 equiv.), Cs<sub>2</sub>CO<sub>3</sub> (132 mg, 0.4 mmol, 2.0 equiv.), **PTH1** (0.8 mg, 0.004 mmol, 2 mol%) and CH<sub>3</sub>CN (2 mL). The mixture was irradiated with a 400 nm LED light for 48 h. Purification by flash chromatography on silica gel (EtOAc/hexane, 1 : 19 v/v) afford product **57** (49 mg, 90%) as a colorless liquid.

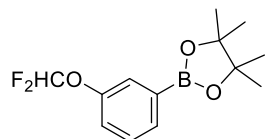

$^1\text{H}$  NMR (500 MHz,  $\text{CDCl}_3$ ): 7.65 (1 H, d,  $J = 7.3$  Hz), 7.53 (1 H, d,  $J = 2.2$  Hz), 7.37 (1 H, t,  $J = 7.7$  Hz), 7.21 (1 H, dd,  $J = 8.1, 2.2$  Hz), 6.53 (1 H, t,  $J = 74.2$  Hz), 1.35 (12 H, s) ppm. –  $^{13}\text{C}$  NMR (125 MHz,  $\text{CDCl}_3$ ): 151.1, 131.9, 129.5, 125.2, 122.7, 116.2 (t,  $J = 259.1$  Hz), 84.3, 25.0 ppm. –  $^{11}\text{B}$  NMR (160.4 Hz,  $\text{CDCl}_3$ ): 30.8 ppm. –  $^{19}\text{F}$  NMR (470.5 Hz,  $\text{CDCl}_3$ ): –80.5 (d,  $J = 74.9$  Hz) ppm. – IR: 2980, 1580, 1491, 1430, 1381, 1355, 1325, 1271, 1212, 1129, 1046, 964  $\text{cm}^{-1}$ .

### 2-(3-Chlorophenyl)-4,4,5,5-tetramethyl-1,3,2-dioxaborolane (**58**)<sup>[15]</sup>

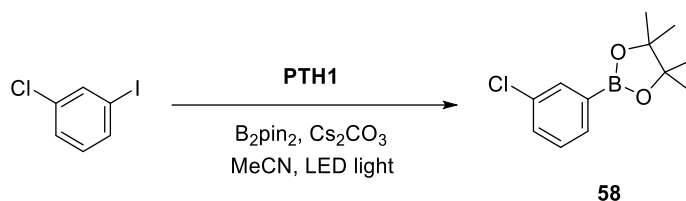

The general procedure GP1 was followed with 1-chloro-3-iodobenzene (47 mg, 0.2 mmol),  $\text{B}_2\text{pin}_2$  (61 mg, 0.24 mmol, 1.2 equiv.),  $\text{Cs}_2\text{CO}_3$  (79 mg, 0.24 mmol, 1.2 equiv.), **PTH1** (0.4 mg, 0.002 mmol, 1 mol%) and  $\text{CH}_3\text{CN}$  (2 mL). The mixture was irradiated with a 400 nm LED light for 24 h. Purification by flash chromatography on silica gel (EtOAc/hexane, 1 : 19 v/v) afford product **58** (24 mg, 50%) as a colorless oil.

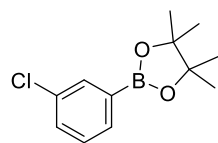

$^1\text{H}$  NMR (500 MHz,  $\text{CDCl}_3$ ): 7.78 (1 H, s), 7.67 (1 H, d,  $J = 7.3$  Hz), 7.42 (1 H, dd,  $J = 8.0, 2.2$  Hz), 7.30 (1 H, t,  $J = 7.7$  Hz), 1.34 (12 H, s) ppm. –  $^{13}\text{C}$  NMR (125 MHz,  $\text{CDCl}_3$ ): 134.7, 134.2, 132.8, 131.4, 129.3, 84.3, 25.0 ppm. –  $^{11}\text{B}$  NMR (160.4 Hz,  $\text{CDCl}_3$ ): 30.6 ppm. – IR: 2978, 1715, 1598, 1562, 1479, 1409, 1349, 1321, 1271, 1259, 1216, 1165, 1142, 1106, 1064, 1023  $\text{cm}^{-1}$ .

### 2-(3,4-Dimethoxyphenyl)-4,4,5,5-tetramethyl-1,3,2-dioxaborolane (59)<sup>[35]</sup>

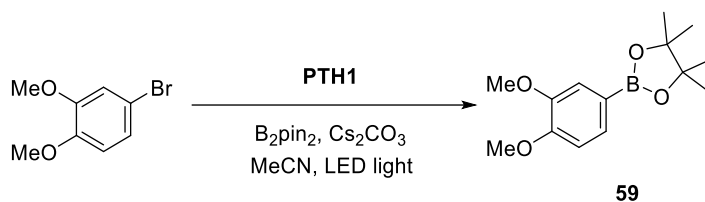

The general procedure GP1 was followed with 4-bromo-1,2-dimethoxybenzene (44 mg, 0.2 mmol), B<sub>2</sub>pin<sub>2</sub> (101 mg, 0.4 mmol, 2.0 equiv.), Cs<sub>2</sub>CO<sub>3</sub> (132 mg, 0.4 mmol, 2.0 equiv.), **PTH1** (0.8 mg, 0.004 mmol, 2 mol%) and CH<sub>3</sub>CN (2 mL). The mixture was irradiated with a 400 nm LED light for 72 h. The crude mixture was diluted in EtOAc (5 mL) and H<sub>2</sub>O (0.5 mL) and added 2-iodoxybenzoic acid (168 mg, 0.6 mmol, 3 equiv.). After heating at 80 °C for 2 h, solid precipitated from the solution was filter off. The filtrate was extracted with saturated NaHCO<sub>3</sub> and brine then filter and concentrated to afford product **59** (46 mg, 86%) as a colorless solid.

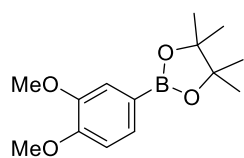

M.p.: 66–69 °C. – <sup>1</sup>H NMR (500 MHz, CDCl<sub>3</sub>): 7.42 (1 H, d, *J* = 8.0 Hz), 7.28 (1 H, s), 6.87 (1 H, d, *J* = 8.0 Hz), 3.91 (3 H, s), 3.88 (3 H, s), 1.32 (12 H, s) ppm. – <sup>13</sup>C NMR (125 MHz, CDCl<sub>3</sub>): 151.7, 148.4, 128.7, 116.7, 110.6, 83.7, 55.9, 55.8, 24.9 ppm. – <sup>11</sup>B NMR (160.4 Hz, CDCl<sub>3</sub>): 30.8 ppm. – IR: 2976, 2837, 1599, 1577, 1518, 1449, 1409, 1351, 1294, 1226, 1175, 1137, 1110, 1095, 1027 cm<sup>-1</sup>.

### 4,4,5,5-Tetramethyl-2-(4-(methylthio)phenyl)-1,3,2-dioxaborolane (60)<sup>[36]</sup>

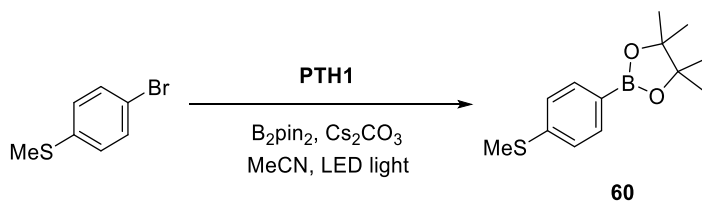

The general procedure GP1 was followed with (4-bromophenyl)(methyl)sulfane (40 mg, 0.2 mmol), B<sub>2</sub>pin<sub>2</sub> (101 mg, 0.4 mmol, 2.0 equiv.), Cs<sub>2</sub>CO<sub>3</sub> (132 mg, 0.4 mmol, 2.0 equiv.), **PTH1** (0.4 mg, 0.002 mmol, 1 mol%) and CH<sub>3</sub>CN (2 mL). The mixture was irradiated with

a 400 nm LED light for 24 h. Purification by flash chromatography on silica gel (EtOAc/hexane, 1 : 15 v/v) afford product **60** (43 mg, 85%) as a colorless solid.

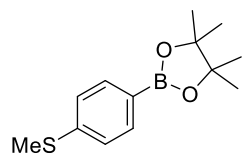

M.p.: 28–31 °C. –  $^1\text{H}$  NMR (500 MHz,  $\text{CDCl}_3$ ): 7.71 (2 H, d,  $J = 8.1$  Hz), 7.23 (2 H, d,  $J = 8.2$  Hz), 2.49 (3 H, s), 1.34 (12 H, s) ppm. –  $^{13}\text{C}$  NMR (125 MHz,  $\text{CDCl}_3$ ): 142.7, 135.2, 125.1, 83.9, 25.0, 15.2 ppm. –  $^{11}\text{B}$  NMR (160.4 Hz,  $\text{CDCl}_3$ ): 30.9 ppm. – IR: 2976, 2922, 1737, 1715, 1545, 1436, 1393, 1355, 1325, 1296, 1271, 1256, 1215, 1100, 1075, 1015, 961  $\text{cm}^{-1}$ .

#### 4-(4,4,5,5-Tetramethyl-1,3,2-dioxaborolan-2-yl)aniline (**61**)<sup>[37]</sup>

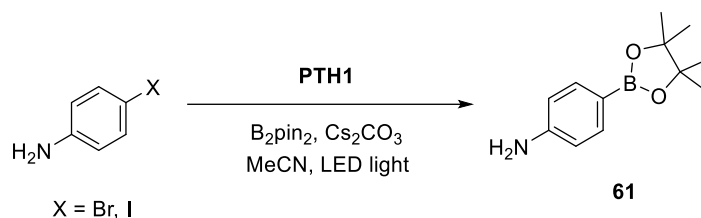

**From 4-iodoaniline:** The general procedure GP1 was followed with 4-iodoaniline (44 mg, 0.2 mmol),  $\text{B}_2\text{pin}_2$  (101 mg, 0.4 mmol, 2.0 equiv.),  $\text{Cs}_2\text{CO}_3$  (132 mg, 0.4 mmol, 2.0 equiv.), **PTH1** (0.2 mg, 0.001 mmol, 0.5 mol%) and  $\text{CH}_3\text{CN}$  (2 mL). The mixture was irradiated with a 400 nm LED light for 48 h. Purification by flash chromatography on silica gel (EtOAc/hexane, 1 : 19 v/v) afford product **61** (35 mg, 80%) as a colorless solid.

**From 4-bromoaniline:** The general procedure GP1 was followed with 4-bromoaniline (34 mg, 0.2 mmol),  $\text{B}_2\text{pin}_2$  (101 mg, 0.4 mmol, 2.0 equiv.),  $\text{Cs}_2\text{CO}_3$  (132 mg, 0.4 mmol, 2.0 equiv.), **PTH1** (0.4 mg, 0.002 mmol, 1 mol%) and  $\text{CH}_3\text{CN}$  (2 mL). The mixture was irradiated with a 400 nm LED light for 48 h. Purification by flash chromatography on silica gel (EtOAc/hexane, 1 : 19 v/v) afford product **61** (32 mg, 72%) as a colorless solid.

**Gram scale from 4-bromoaniline:** According to general procedure GP1 two identical reactions were run with 4-bromoaniline (688 mg, 4 mmol),  $\text{B}_2\text{pin}_2$  (2.0 g, 8.0 mmol, 2.0 equiv.),  $\text{Cs}_2\text{CO}_3$  (2.6 g, 8.0 mmol, 2.0 equiv.), **PTH1** (8.0 mg, 0.04 mmol, 1 mol%) and

CH<sub>3</sub>CN (40 mL). The mixture was irradiated with a 400 nm LED light for 48 h. Purification by flash chromatography on silica gel (EtOAc/hexane, 1 : 15 v/v) afford product **61** (1.7 g, 97%) as a colorless solid.

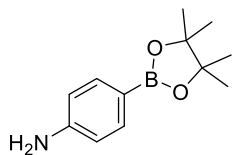

M.p.: 131–134 °C. – <sup>1</sup>H NMR (500 MHz, CDCl<sub>3</sub>): 7.63 (2 H, d, *J* = 8.3 Hz), 6.65 (2 H, d, *J* = 8.4 Hz), 3.80 (2 H, brs), 1.33 (12 H, s) ppm. – <sup>13</sup>C NMR (125 MHz, CDCl<sub>3</sub>): 149.4, 136.5, 114.2, 83.4, 25.0 ppm. – <sup>11</sup>B NMR (160.4

Hz, CDCl<sub>3</sub>): 30.8 ppm. – IR: 3448, 3356, 2993, 2975, 2926, 1701, 1626, 1601, 1564, 1470, 1429, 1396, 1351, 1299, 1270, 1140, 1108, 1086 cm<sup>-1</sup>.

### 3-(4,4,5,5-Tetramethyl-1,3,2-dioxaborolan-2-yl)aniline (**62**)<sup>[38]</sup>

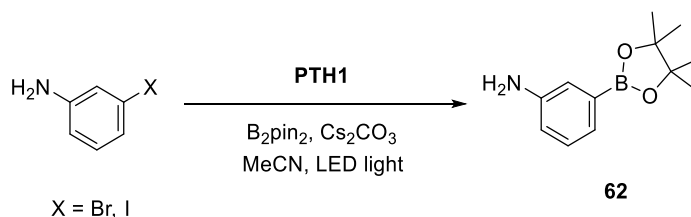

**From 3-iodoaniline:** The general procedure GP1 was followed with 3-iodoaniline (44 mg, 0.2 mmol), B<sub>2</sub>pin<sub>2</sub> (101 mg, 0.4 mmol, 2.0 equiv.), Cs<sub>2</sub>CO<sub>3</sub> (132 mg, 0.4 mmol, 2.0 equiv.), **PTH1** (0.2 mg, 0.001 mmol, 0.5 mol%) and CH<sub>3</sub>CN (2 mL). The mixture was irradiated with a 400 nm LED light for 48 h. Purification by flash chromatography on silica gel (EtOAc/hexane, 1 : 19 v/v) afford product **62** (31 mg, 70%) as a colorless solid.

**From 3-bromoaniline:** The general procedure GP1 was followed with 3-bromoaniline (34 mg, 0.2 mmol), B<sub>2</sub>pin<sub>2</sub> (101 mg, 0.4 mmol, 2.0 equiv.), Cs<sub>2</sub>CO<sub>3</sub> (132 mg, 0.4 mmol, 2.0 equiv.), **PTH1** (0.8 mg, 0.004 mmol, 2 mol%) and CH<sub>3</sub>CN (2 mL). The mixture was irradiated with a 400 nm LED light for 48 h. Purification by flash chromatography on silica gel (EtOAc/hexane, 1 : 19 v/v) afford product **62** (29 mg, 65%) as a colorless solid.

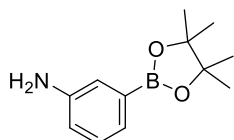

M.p.: 65–67 °C. – <sup>1</sup>H NMR (500 MHz, CDCl<sub>3</sub>): 7.21 (1 H, d, *J* = 7.2 Hz), 7.17 (1 H, t, *J* = 7.5 Hz), 7.14 (1 H, d, *J* = 2.3 Hz), 6.82–6.74 (1 H, m), 3.60



(2 H, brs), 1.34 (12 H, s) ppm. –  $^{13}\text{C}$  NMR (125 MHz,  $\text{CDCl}_3$ ): 145.9, 128.9, 125.1, 121.3, 118.2, 83.8, 25.0 ppm. –  $^{11}\text{B}$  NMR (160.4 Hz,  $\text{CDCl}_3$ ): 31.0 ppm. – IR: 3463, 3374, 3228, 2984, 1709, 1627, 1600, 1492, 1441, 1355, 1319, 1284, 1262, 1210, 1138, 1110, 1075, 991, 965  $\text{cm}^{-1}$ .

### 2-Methyl-5-(4,4,5,5-tetramethyl-1,3,2-dioxaborolan-2-yl)aniline (**63**)<sup>[39]</sup>

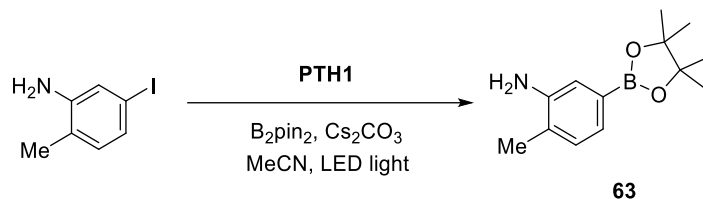

The general procedure GP1 was followed with 5-iodo-2-methylaniline (47 mg, 0.2 mmol),  $\text{B}_2\text{pin}_2$  (101 mg, 0.4 mmol, 2.0 equiv.),  $\text{Cs}_2\text{CO}_3$  (132 mg, 0.4 mmol, 2.0 equiv.), **PTH1** (0.2 mg, 0.001 mmol, 0.5 mol%) and  $\text{CH}_3\text{CN}$  (2 mL). The mixture was irradiated with a 400 nm LED light for 48 h. Purification by flash chromatography on silica gel (EtOAc/hexane, 1 : 19 v/v) afford product **63** (33 mg, 72%) as a colorless liquid.

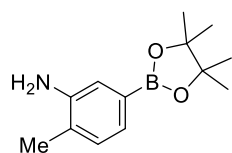

$^1\text{H}$  NMR (500 MHz,  $\text{CDCl}_3$ ): 7.17 (1 H, d,  $J = 7.4$  Hz), 7.12 (1 H, s), 7.07 (1 H, d,  $J = 7.3$  Hz), 3.57 (2 H, brs), 2.18 (3 H, s), 1.34 (12 H, s) ppm. –

$^{13}\text{C}$  NMR (125 MHz,  $\text{CDCl}_3$ ): 144.2, 130.1, 126.0, 125.4, 121.2, 83.7, 25.0, 17.7 ppm. –  $^{11}\text{B}$  NMR (160.4 Hz,  $\text{CDCl}_3$ ): 31.0 ppm. – IR: 3373, 2979, 1708, 1634, 1566, 1416, 1354, 1321, 1260, 1220, 1144, 1092, 995  $\text{cm}^{-1}$ .

### N-(4-(Trifluoro- $\lambda^4$ -boranyl)phenyl)acetamide, potassium salt (**64**)<sup>[40]</sup>

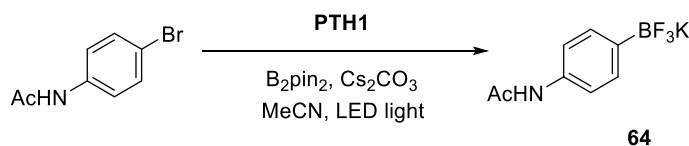

The general procedure GP1 was followed with N-(4-bromophenyl)acetamide (43 mg, 0.2 mmol),  $\text{B}_2\text{pin}_2$  (101 mg, 0.4 mmol, 2.0 equiv.),  $\text{Cs}_2\text{CO}_3$  (132 mg, 0.4 mmol, 2.0 equiv.), **PTH1**

(0.8 mg, 0.004 mmol, 2 mol%) and CH<sub>3</sub>CN (2 mL). The mixture was irradiated with a 400 nm LED light for 48 h. Purification by rapid column chromatography followed by treatment with KHF<sub>2</sub> according to GP3 afforded organotrifluoroborate salt **64** (43 mg, 83%) as a colorless solid.

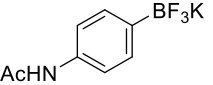
 M.p.: > 200 °C. – <sup>1</sup>H NMR (500 MHz, DMSO): 9.58 (1 H, s), 7.27 (2 H, d, *J* = 7.8 Hz), 7.20 (2 H, d, *J* = 7.2 Hz), 1.98 (3 H, s) ppm. – <sup>13</sup>C NMR (125 MHz, DMSO): 167.7, 136.5, 131.4, 117.6, 24.0 ppm. – <sup>11</sup>B NMR (160.4 Hz, DMSO): 3.2 ppm. – <sup>19</sup>F NMR (470.5 Hz, DMSO): –142.0 ppm. – IR: 3609, 3232, 1975, 1658, 1601, 1540, 1372, 1322, 1293, 1239, 1213, 1185, 1026, 961 cm<sup>-1</sup>.

### Methyl 3-(4,4,5,5-tetramethyl-1,3,2-dioxaborolan-2-yl)benzoate (**65**)<sup>[41]</sup>

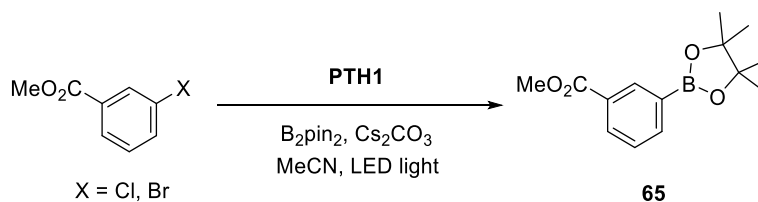

**From methyl 3-bromobenzoate:** The general procedure GP1 was followed with methyl 3-bromobenzoate (43 mg, 0.2 mmol), B<sub>2</sub>pin<sub>2</sub> (101 mg, 0.4 mmol, 2.0 equiv.), Cs<sub>2</sub>CO<sub>3</sub> (132 mg, 0.4 mmol, 2.0 equiv.), **PTH1** (0.8 mg, 0.004 mmol, 2 mol%) and CH<sub>3</sub>CN (2 mL). The mixture was irradiated with a 400 nm LED light for 48 h. Purification by flash chromatography on silica gel (EtOAc/hexane, 1 : 19 v/v) afford product **65** (43 mg, 83%) as a colorless solid.

**From methyl 3-chlorobenzoate:** The general procedure GP1 was followed with methyl 3-chlorobenzoate (34 mg, 0.2 mmol), B<sub>2</sub>pin<sub>2</sub> (101 mg, 0.4 mmol, 2.0 equiv.), Cs<sub>2</sub>CO<sub>3</sub> (132 mg, 0.4 mmol, 2.0 equiv.), **PTH1** (0.8 mg, 0.004 mmol, 2 mol%) and CH<sub>3</sub>CN (2 mL). The mixture was irradiated with a 400 nm LED light for 48 h. Purification by flash

chromatography on silica gel (EtOAc/hexane, 1 : 19 v/v) afford product **65** (43 mg, 82%) as a colorless solid.

**From methyl 3-chlorobenzoate with 1.5 equiv. of B<sub>2</sub>pin<sub>2</sub>:** The general procedure GP1 was followed with methyl 3-chlorobenzoate (34 mg, 0.2 mmol), B<sub>2</sub>pin<sub>2</sub> (76 mg, 0.3 mmol, 1.5 equiv.), Cs<sub>2</sub>CO<sub>3</sub> (132 mg, 0.4 mmol, 2.0 equiv.), **PTH1** (0.8 mg, 0.004 mmol, 2 mol%) and CH<sub>3</sub>CN (2 mL). The mixture was irradiated with a 400 nm LED light for 48 h. Purification by flash chromatography on silica gel (EtOAc/hexane, 1 : 19 v/v) afford product **65** (38 mg, 73%) as a colorless solid.

**From methyl 3-chlorobenzoate at 420 nm wavelength:** The general procedure GP1 was followed with methyl 3-chlorobenzoate (34 mg, 0.2 mmol), B<sub>2</sub>pin<sub>2</sub> (151 mg, 0.6 mmol, 3.0 equiv.), Cs<sub>2</sub>CO<sub>3</sub> (132 mg, 0.4 mmol, 2.0 equiv.), **PTH1** (0.8 mg, 0.004 mmol, 2 mol%) and CH<sub>3</sub>CN (2 mL). The mixture was irradiated with a 400 nm LED light for 36 h. Purification by flash chromatography on silica gel (EtOAc/hexane, 1 : 19 v/v) afford product **65** (42 mg, 81%) as a colorless solid.

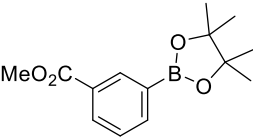 M.p.: 65–68 °C. – <sup>1</sup>H NMR (500 MHz, CDCl<sub>3</sub>): 8.47 (1 H, s), 8.12 (1 H, d, *J* = 10.9 Hz), 7.98 (1 H, d, *J* = 7.4 Hz), 7.44 (1 H, t, *J* = 7.6 Hz), 3.91 (3 H, s), 1.35 (12 H, s) ppm. – <sup>13</sup>C NMR (125 MHz, CDCl<sub>3</sub>): 167.3, 139.3, 136.0, 132.4, 129.7, 127.9, 84.2, 52.2, 25.0 ppm. – <sup>11</sup>B NMR (160.4 Hz, CDCl<sub>3</sub>): 30.7 ppm. – IR: 2978, 1715, 1605, 1487, 1420, 1358, 1323, 1278, 1219, 1166, 1142, 1091, 1076 cm<sup>-1</sup>.

#### Dimethyl 4-(trifluoro-*l*-boraneyl)phthalate, potassium salt (**66**)

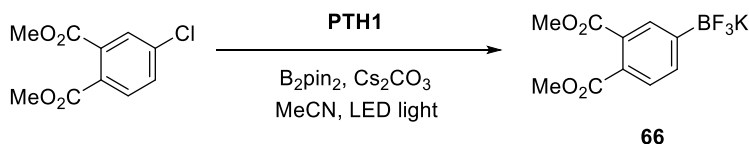

The general procedure GP1 was followed with dimethyl 4-chlorophthalate (46 mg, 0.2 mmol), B<sub>2</sub>pin<sub>2</sub> (101 mg, 0.4 mmol, 2.0 equiv.), Cs<sub>2</sub>CO<sub>3</sub> (132 mg, 0.4 mmol, 2.0 equiv.), **PTH1**

(0.8 mg, 0.004 mmol, 2 mol%) and CH<sub>3</sub>CN (2 mL). The mixture was irradiated with a 400 nm LED light for 18 h. Purification by GP2 afforded organotrifluoroborate salt **66** (37 mg, 62%) as a colorless solid.

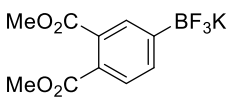
 M.p.: > 200 °C. – <sup>1</sup>H NMR (500 MHz, CD<sub>3</sub>CN): 7.73 (1 H, s), 7.66 (1 H, s), 7.57 (1 H, s), 3.81 (6 H, s) ppm. – <sup>13</sup>C NMR (125 MHz, CD<sub>3</sub>CN): 170.4, 169.4, 134.8, 132.2, 131.7, 129.6, 128.1, 52.9, 52.8 ppm. – <sup>11</sup>B NMR (160.4 Hz, CD<sub>3</sub>CN): 2.7 ppm. – <sup>19</sup>F NMR (470.5 Hz, CDCl<sub>3</sub>): 143.6 ppm. – IR: 3405, 2957, 1705, 1639, 1558, 1492, 1439, 1364, 1296, 1208, 1134, 1074, 1000 cm<sup>-1</sup>. – HRMS: calcd for C<sub>10</sub>H<sub>9</sub>BF<sub>3</sub>O<sub>4</sub>: 261.0546, found 261.0549 [M–K<sup>+</sup>].

#### 4-(4,4,5,5-Tetramethyl-1,3,2-dioxaborolan-2-yl)benzaldehyde (**67**)<sup>[42]</sup>

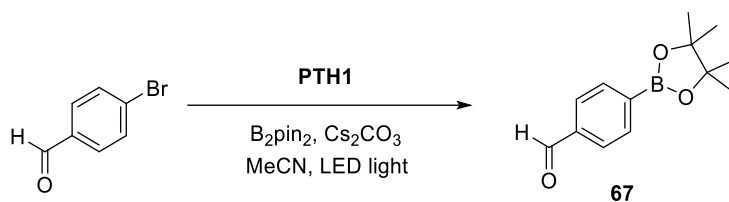

The general procedure GP1 was followed with 4-bromobenzaldehyde (37 mg, 0.2 mmol), B<sub>2</sub>pin<sub>2</sub> (101 mg, 0.4 mmol, 2.0 equiv.), Cs<sub>2</sub>CO<sub>3</sub> (132 mg, 0.4 mmol, 2.0 equiv.), **PTH1** (0.8 mg, 0.004 mmol, 2 mol%) and CH<sub>3</sub>CN (2 mL). The mixture was irradiated with a 400 nm LED light for 48 h. Purification by flash chromatography on silica gel (EtOAc/hexane, 1 : 15 v/v) afford product **67** (32 mg, 70%) as a colorless solid.

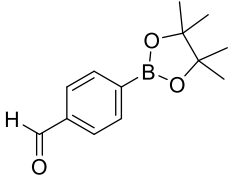
 M.p.: 48–50 °C. – <sup>1</sup>H NMR (500 MHz, CDCl<sub>3</sub>): 10.05 (1 H, s), 7.96 (2 H, d, *J* = 7.9 Hz), 7.86 (2 H, d, *J* = 7.8 Hz), 1.36 (12 H, s) ppm. – <sup>13</sup>C NMR (125 MHz, CDCl<sub>3</sub>): 192.8, 138.2, 135.4, 128.8, 84.5, 25.0 ppm. – <sup>11</sup>B NMR (160.4 Hz, CDCl<sub>3</sub>): 30.8 ppm. – IR: 3429, 2978, 1704, 1583, 1507, 1382, 1355, 1304, 1271, 1168, 1141, 1084 cm<sup>-1</sup>.

## 2-(9H-Fluoren-2-yl)-4,4,5,5-tetramethyl-1,3,2-dioxaborolane (68)<sup>[43]</sup>

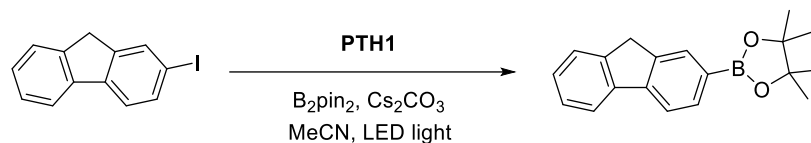

68

**At 400 nm wavelength:** The general procedure GP1 was followed with 2-iodo-9H-fluorene (58 mg, 0.2 mmol), B<sub>2</sub>pin<sub>2</sub> (101 mg, 0.4 mmol, 2.0 equiv.), Cs<sub>2</sub>CO<sub>3</sub> (132 mg, 0.4 mmol, 2.0 equiv.), PTH1 (0.4 mg, 0.002 mmol, 1 mol%) and CH<sub>3</sub>CN (2 mL). The mixture was irradiated with a 400 nm LED light for 36 h. Purification by flash chromatography on silica gel (EtOAc/hexane, 1 : 15 v/v) afford product **68** (46 mg, 80%) as a colorless solid.

**At 450 nm wavelength:** The general procedure GP1 was followed with 2-iodo-9H-fluorene (58 mg, 0.2 mmol), B<sub>2</sub>pin<sub>2</sub> (151 mg, 0.6 mmol, 3.0 equiv.), Cs<sub>2</sub>CO<sub>3</sub> (132 mg, 0.4 mmol, 2.0 equiv.), PTH1 (0.8 mg, 0.004 mmol, 2 mol%) and CH<sub>3</sub>CN (2 mL). The mixture was irradiated with a 450 nm LED light for 36 h. Purification by flash chromatography on silica gel (EtOAc/hexane, 1 : 15 v/v) afford product **68** (55 mg, 95%) as a colorless solid.

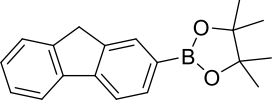

M.p.: 79–81 °C. – <sup>1</sup>H NMR (500 MHz, CDCl<sub>3</sub>): 8.02 (1 H, s), 7.88–7.77 (3 H, m), 7.56 (1 H, d, *J* = 7.3 Hz), 7.39 (1 H, t, *J* = 7.4 Hz), 7.34 (1 H, t, *J* = 7.4 Hz), 3.92 (2 H, s), 1.39 (12 H, s) ppm. – <sup>13</sup>C NMR (125 MHz, CDCl<sub>3</sub>): 144.7, 144.0, 142.6, 141.6, 133.5, 131.4, 127.3, 126.9, 125.2, 120.5, 119.4, 83.9, 36.9, 25.1 ppm. – <sup>11</sup>B NMR (160.4 Hz, CDCl<sub>3</sub>): 31.4 ppm. – IR: 3395, 2976, 1712, 1611, 1489, 1459, 1417, 1351, 1315, 1267, 1230, 1142, 1100, 1077, 1003 cm<sup>-1</sup>.

**2-(3-((5-(4-Fluorophenyl)thiophen-2-yl)methyl)-4-methylphenyl)-4,4,5,5-tetramethyl-1,3,2-dioxaborolane (69)**

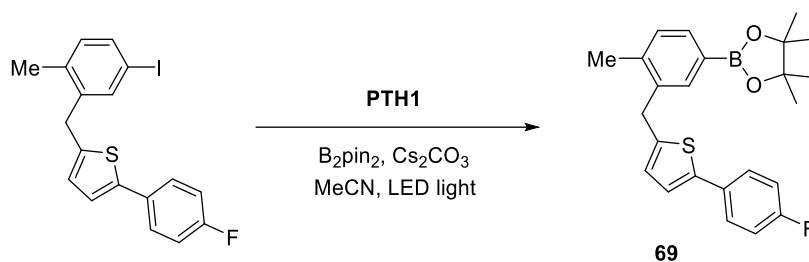

The general procedure GP1 was followed with 2-(4-fluorophenyl)-5-(5-iodo-2-methylbenzyl)thiophene (82 mg, 0.2 mmol),  $B_2pin_2$  (101 mg, 0.4 mmol, 2.0 equiv.),  $Cs_2CO_3$  (132 mg, 0.4 mmol, 2.0 equiv.), **PTH1** (0.4 mg, 0.002 mmol, 1 mol%) and  $CH_3CN$  (2 mL). The mixture was irradiated with a 400 nm LED light for 48 h. Purification by flash chromatography on silica gel (EtOAc/hexane, 1 : 15 v/v) afford product **69** (64 mg, 78%) as a colorless liquid.

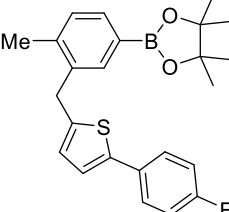

$^1H$  NMR (500 MHz,  $CDCl_3$ ): 7.71 (1 H, s), 7.66 (1 H, d,  $J = 7.5$  Hz), 7.47 (2 H, dd,  $J = 8.8, 5.3$  Hz), 7.21 (1 H, d,  $J = 7.5$  Hz), 7.06–6.96 (3 H, m), 6.63 (1 H, d,  $J = 3.6$  Hz), 4.15 (2 H, s), 2.34 (3 H, s), 1.36 (12 H, s) ppm.

$^{13}C$  NMR (125 MHz,  $CDCl_3$ ): 162.2 (d,  $J = 246.4$  Hz), 144.0, 141.4, 140.2, 137.5, 136.4, 133.8, 131.0, 130.2, 127.2 (d,  $J = 8.2$  Hz), 125.8, 122.7, 115.8 (d,  $J = 21.5$  Hz), 83.8, 34.4, 25.0, 19.9 ppm. –  $^{11}B$  NMR (160.4 Hz,  $CDCl_3$ ): 31.5 ppm. –  $^{19}F$  NMR (470.5 Hz,  $CDCl_3$ ): -115.3 ppm. – IR: 2977, 1711, 1610, 1549, 1508, 1410, 1355, 1318, 1273, 1219, 1159, 1144, 1088, 1044  $cm^{-1}$ . – HRMS: calcd for  $C_{24}H_{27}BFO_2S$ : 409.1803, found 409.1805  $[M+H]^+$ .

### 4,4,5,5-Tetramethyl-2-(naphthalen-2-yl)-1,3,2-dioxaborolane (70)<sup>[15]</sup>

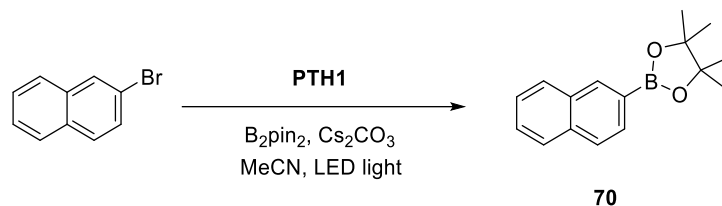

The general procedure GP1 was followed with 2-bromonaphthalene (42 mg, 0.2 mmol), B<sub>2</sub>pin<sub>2</sub> (101 mg, 0.4 mmol, 2.0 equiv.), Cs<sub>2</sub>CO<sub>3</sub> (132 mg, 0.4 mmol, 2.0 equiv.), **PTH1** (0.4 mg, 0.002 mmol, 1 mol%) and CH<sub>3</sub>CN (2 mL). The mixture was irradiated with a 400 nm LED light for 48 h. Purification by flash chromatography on silica gel (EtOAc/hexane, 1 : 15 v/v) afford product **70** (29 mg, 57%) as a colorless liquid.

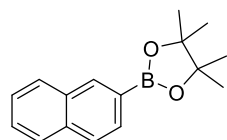

<sup>1</sup>H NMR (500 MHz, CDCl<sub>3</sub>): 8.39 (1 H, s), 7.90 (1 H, d, *J* = 7.9 Hz), 7.87–7.82 (3 H, m), 7.57–7.42 (2 H, m), 1.41 (12 H, s) ppm. – <sup>13</sup>C NMR (125 MHz, CDCl<sub>3</sub>): 136.4, 135.2, 133.0, 130.5, 128.8, 127.8, 127.1, 125.9, 84.1, 25.1 ppm. – <sup>11</sup>B NMR (160.4 Hz, CDCl<sub>3</sub>): 31.1 ppm. – IR: 2976, 2928, 1629, 1599, 1474, 1430, 1399, 1382, 1371, 1297, 1271, 1236, 1143 cm<sup>-1</sup>.

### Methyl 5-(4,4,5,5-tetramethyl-1,3,2-dioxaborolan-2-yl)-1-naphthoate (71)

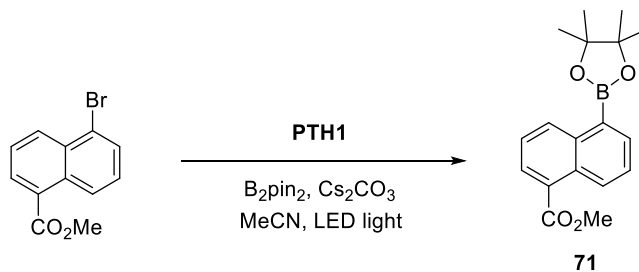

The general procedure GP1 was followed with methyl 5-bromo-1-naphthoate (53 mg, 0.2 mmol), B<sub>2</sub>pin<sub>2</sub> (101 mg, 0.4 mmol, 2.0 equiv.), Cs<sub>2</sub>CO<sub>3</sub> (132 mg, 0.4 mmol, 2.0 equiv.), **PTH1** (0.8 mg, 0.004 mmol, 2 mol%) and CH<sub>3</sub>CN (2 mL). The mixture was irradiated with a 400

nm LED light for 48 h. Purification by flash chromatography on silica gel (EtOAc/hexane, 1 : 15 v/v) afford product **71** (38 mg, 61%) as a colorless solid.

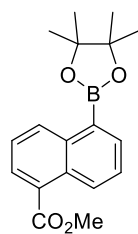

M.p.: 65–68 °C. –  $^1\text{H}$  NMR (500 MHz,  $\text{CDCl}_3$ ): 9.01 (2 H, d,  $J = 8.4$  Hz), 8.15 (2 H, t,  $J = 6.8$  Hz), 7.65–7.49 (2 H, m), 4.00 (3 H, s), 1.43 (12 H, s) ppm. –  $^{13}\text{C}$  NMR (125 MHz,  $\text{CDCl}_3$ ): 168.4, 137.4, 136.1, 133.8, 131.3, 129.8, 129.2, 127.5, 126.8, 125.0, 84.0, 52.3, 25.1 ppm. –  $^{11}\text{B}$  NMR (160.4 Hz,  $\text{CDCl}_3$ ): 32.0 ppm. – IR: 2980, 1736, 1717, 1511, 1436, 1371, 1371, 1332, 1300, 1236, 1166, 1133, 1044, 970  $\text{cm}^{-1}$ . – HRMS: calcd for  $\text{C}_{18}\text{H}_{22}\text{BO}_4$ : 313.1606, found 313.1607  $[\text{M}+\text{H}^+]$ .

### 2-(4-Fluoronaphthalen-1-yl)-4,4,5,5-tetramethyl-1,3,2-dioxaborolane (**72**)<sup>[44]</sup>

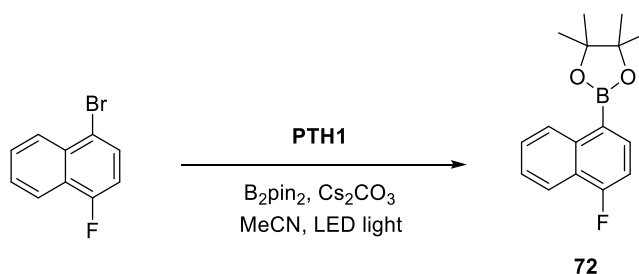

The general procedure GP1 was followed with 1-bromo-4-fluoronaphthalene (45 mg, 0.2 mmol),  $\text{B}_2\text{pin}_2$  (101 mg, 0.4 mmol, 2.0 equiv.),  $\text{Cs}_2\text{CO}_3$  (132 mg, 0.4 mmol, 2.0 equiv.), **PTH1** (0.4 mg, 0.002 mmol, 1 mol%) and  $\text{CH}_3\text{CN}$  (2 mL). The mixture was irradiated with a 400 nm LED light for 48 h. Purification by flash chromatography on silica gel (EtOAc/hexane, 1 : 15 v/v) afford product **72** (40 mg, 74%) as a colorless liquid.

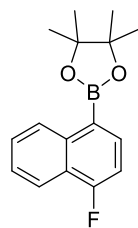

$^1\text{H}$  NMR (500 MHz,  $\text{CDCl}_3$ ): 8.81 (1 H, d,  $J = 8.4$  Hz), 8.13 (1 H, d,  $J = 8.2$  Hz), 8.08–8.02 (1 H, m), 7.60 (1 H, t,  $J = 7.1$  Hz), 7.54 (1 H, t,  $J = 7.4$  Hz), 7.14 (1 H, dd,  $J = 10.4, 7.7$  Hz), 1.42 (12 H, s) ppm. –  $^{13}\text{C}$  NMR (125 MHz,  $\text{CDCl}_3$ ): 161.4 (d,  $J = 256.8$  Hz), 138.9 (d,  $J = 4.7$  Hz), 136.3 (d,  $J = 8.9$  Hz), 128.4 (d,  $J = 3.0$  Hz), 127.4, 126.0, 123.7 (d,  $J = 15.1$  Hz), 120.7 (d,  $J = 6.3$  Hz), 108.9 (d,  $J = 18.9$  Hz), 83.9, 25.1



ppm. –  $^{11}\text{B}$  NMR (160.4 Hz,  $\text{CDCl}_3$ ): 31.4 ppm. –  $^{19}\text{F}$  NMR (470.5 Hz,  $\text{CDCl}_3$ ): –118.2 ppm.  
– IR: 2999, 1709, 1575, 1509, 1427, 1359, 1259, 1220, 1143, 1091, 1049, 1023  $\text{cm}^{-1}$ .

### 2-(6-Methoxynaphthalen-1-yl)-4,4,5,5-tetramethyl-1,3,2-dioxaborolane (**73**)<sup>[45]</sup>

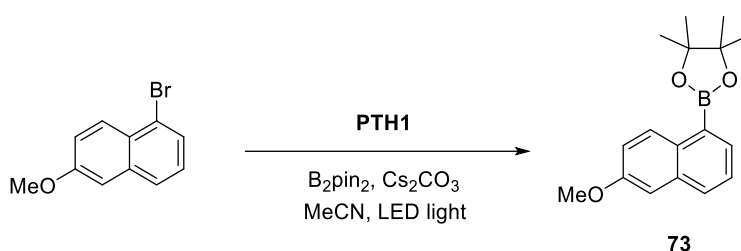

The general procedure GP1 was followed with 1-bromo-6-methoxynaphthalene (48 mg, 0.2 mmol),  $\text{B}_2\text{pin}_2$  (101 mg, 0.4 mmol, 2.0 equiv.),  $\text{Cs}_2\text{CO}_3$  (132 mg, 0.4 mmol, 2.0 equiv.), **PTH1** (0.8 mg, 0.004 mmol, 2 mol%) and  $\text{CH}_3\text{CN}$  (2 mL). The mixture was irradiated with a 400 nm LED light for 48 h. Purification by flash chromatography on silica gel (EtOAc/hexane, 1 : 15 v/v) afford product **73** (34 mg, 60%) as a colorless liquid.

$^1\text{H}$  NMR (500 MHz,  $\text{CDCl}_3$ ): 8.30 (1 H, s), 7.82 (1 H, d,  $J = 8.2$  Hz), 7.78 (1 H, d,  $J = 8.6$  Hz), 7.72 (1 H, d,  $J = 8.2$  Hz), 7.18–7.11 (2 H, m), 3.93 (3 H, s), 1.39 (12 H, s) ppm. –  $^{13}\text{C}$  NMR (125 MHz,  $\text{CDCl}_3$ ): 158.7, 136.6, 136.1, 131.2, 130.4, 128.5, 126.0, 118.8, 105.8, 83.9, 55.4, 25.1 ppm. –  $^{11}\text{B}$  NMR (160.4 Hz,  $\text{CDCl}_3$ ): 31.3 ppm. – IR: 3002, 1709, 1626, 1487, 1418, 1358, 1272, 1219, 1144, 1080, 1030  $\text{cm}^{-1}$ .

### 4,4,5,5-Tetramethyl-2-(phenanthren-9-yl)-1,3,2-dioxaborolane (**74**)<sup>□</sup>

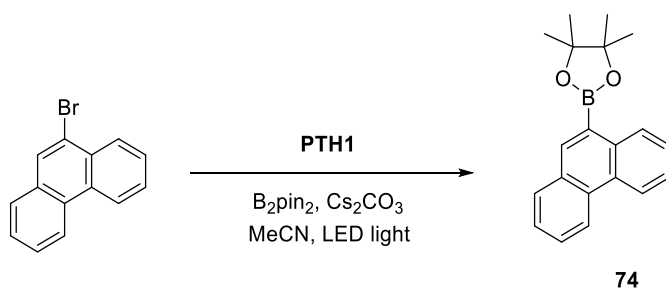

The general procedure GP1 was followed with 9-bromophenanthrene (52 mg, 0.2 mmol), B<sub>2</sub>pin<sub>2</sub> (101 mg, 0.4 mmol, 2.0 equiv.), Cs<sub>2</sub>CO<sub>3</sub> (132 mg, 0.4 mmol, 2.0 equiv.), PTH1 (0.4 mg, 0.002 mmol, 1 mol%) and CH<sub>3</sub>CN (2 mL). The mixture was irradiated with a 400 nm LED light for 48 h. Purification by flash chromatography on silica gel (EtOAc/hexane, 1 : 15 v/v) afford product **74** (37 mg, 61%) as a colorless liquid.

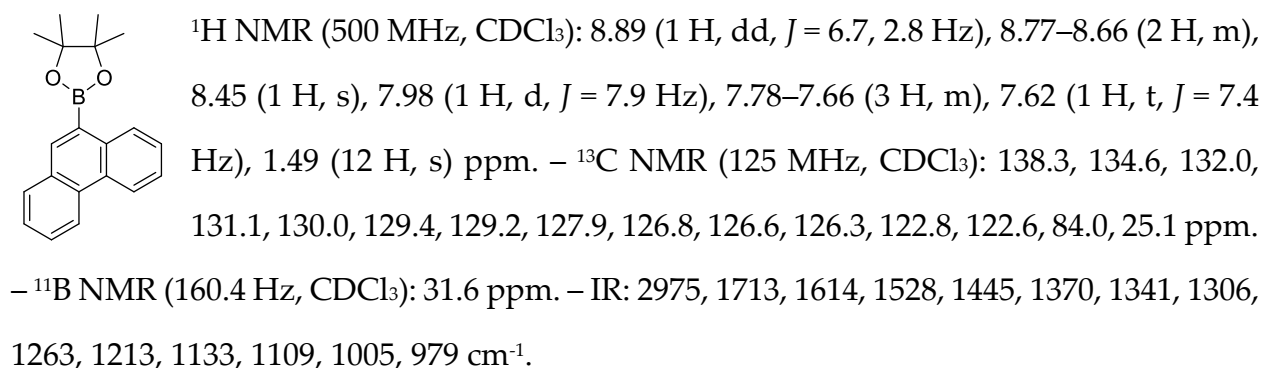

#### 5-(4,4,5,5-Tetramethyl-1,3-dioxaborolan-2-yl)pyridin-2-amine (**75**)<sup>[46]</sup>

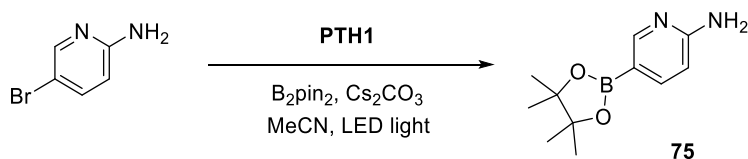

The general procedure GP1 was followed with 5-bromopyridin-2-amine (35 mg, 0.2 mmol), B<sub>2</sub>pin<sub>2</sub> (152 mg, 0.6 mmol, 3.0 equiv.), Cs<sub>2</sub>CO<sub>3</sub> (197 mg, 0.6 mmol, 3.0 equiv.), PTH1 (2.0 mg, 0.01 mmol, 5 mol%) and CH<sub>3</sub>CN (2 mL). The mixture was irradiated with a 400 nm LED light for 48 h. Purification by flash chromatography on silica gel (EtOAc) afford product **75** (27 mg, 62%) as a colorless solid.

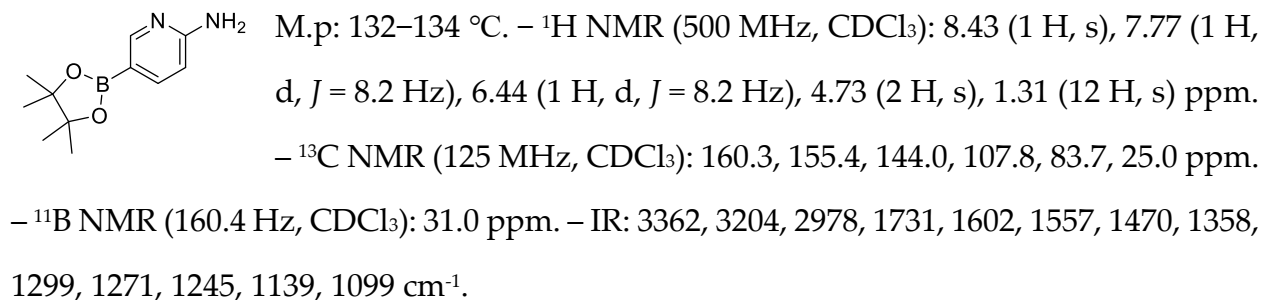

### 2-Methyl-4-(trifluoro- $\lambda^4$ -boraneyl)pyridine, potassium salt (76)<sup>[47]</sup>

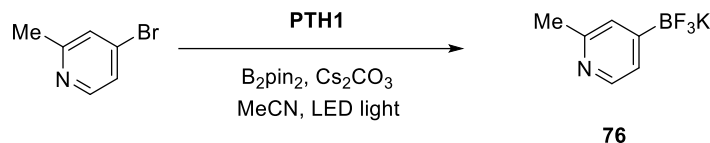

The general procedure GP1 was followed with 4-bromo-2-methylpyridine (34 mg, 0.2 mmol), B<sub>2</sub>pin<sub>2</sub> (101 mg, 0.4 mmol, 2.0 equiv.), Cs<sub>2</sub>CO<sub>3</sub> (79 mg, 0.24 mmol, 1.2 equiv.), **PTH1** (0.8 mg, 0.004 mmol, 2 mol%) and CH<sub>3</sub>CN (2 mL). The mixture was irradiated with a 400 nm LED light for 18 h. Purification by treatment with KF, tartaric acid and then K<sub>2</sub>CO<sub>3</sub> according to GP2 afforded organotrifluoroborate salt **76** (40 mg, 99%) as a colorless solid.

M.p.: > 200 °C. – <sup>1</sup>H NMR (500 MHz, CD<sub>3</sub>CN): 8.20 (1 H, d, *J* = 4.8 Hz), 7.24 (1 H, s), 7.15 (1 H, d, *J* = 4.6 Hz), 2.41 (3 H, s) ppm. – <sup>13</sup>C NMR (125 MHz, CD<sub>3</sub>CN): 156.6, 147.8, 127.1, 124.8, 24.3 ppm. – <sup>11</sup>B NMR (160.4 Hz, CD<sub>3</sub>CN): 2.8 ppm. – <sup>19</sup>F NMR (470.5 Hz, CD<sub>3</sub>CN): -144.2 (dd, *J* = 99.9, 44.1 Hz) ppm. – IR: 3358, 1634, 1539, 1447, 1384, 1273, 1172, 1007, 977 cm<sup>-1</sup>.

### 4-Methyl-3-(trifluoro- $\lambda^4$ -boraneyl)pyridine, potassium salt (77)

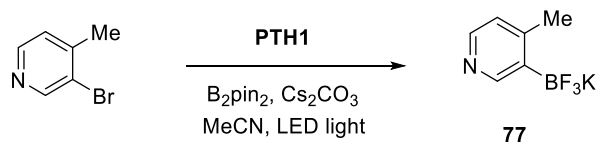

The general procedure GP1 was followed with 3-bromo-4-methylpyridine (34 mg, 0.2 mmol), B<sub>2</sub>pin<sub>2</sub> (101 mg, 0.4 mmol, 2.0 equiv.), Cs<sub>2</sub>CO<sub>3</sub> (79 mg, 0.24 mmol, 1.2 equiv.), **PTH1** (0.8 mg, 0.004 mmol, 2 mol%) and CH<sub>3</sub>CN (2 mL). The mixture was irradiated with a 400 nm LED light for 18 h. Purification by GP2 afforded organotrifluoroborate salt **77** (28 mg, 70%) as a colorless solid.

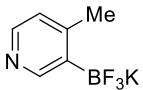
 M.p.: > 200 °C. – <sup>1</sup>H NMR (500 MHz, CD<sub>3</sub>CN): 8.48 (1 H, s), 8.17 (1 H, d, *J* = 5.0 Hz), 6.95 (1 H, d, *J* = 5.0 Hz), 2.36 (3 H, s) ppm. – <sup>13</sup>C NMR (125 MHz, CD<sub>3</sub>CN): 153.4, 151.4, 147.9, 125.2, 21.3 ppm. – <sup>11</sup>B NMR (160.4 Hz, CD<sub>3</sub>CN): 3.4 (q, *J* = 44.1 Hz) ppm. – <sup>19</sup>F NMR (470.5 Hz, CD<sub>3</sub>CN): –140.4 (dd, *J* = 103.3, 45.2 Hz) ppm. – IR: 3382, 1737, 1614, 1476, 1408, 1360, 1294, 1231, 1192, 1128, 957 cm<sup>-1</sup>. – HRMS: calcd for C<sub>6</sub>H<sub>6</sub>BF<sub>3</sub>N: 160.0551, found 160.0549 [M–K<sup>+</sup>].

### 3-Fluoro-5-(trifluoro-λ<sup>4</sup>-boraneyl)pyridine, potassium salt (78)

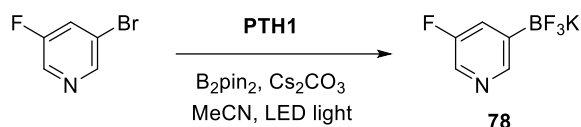

The general procedure GP1 was followed with 3-bromo-5-fluoropyridine (35 mg, 0.2 mmol), B<sub>2</sub>pin<sub>2</sub> (101 mg, 0.4 mmol, 2.0 equiv.), Cs<sub>2</sub>CO<sub>3</sub> (79 mg, 0.24 mmol, 1.2 equiv.), **PTH1** (0.8 mg, 0.004 mmol, 2 mol%) and CH<sub>3</sub>CN (2 mL). The mixture was irradiated with a 400 nm LED light for 18 h. Purification by treatment with KF, tartaric acid and then K<sub>2</sub>CO<sub>3</sub> according to GP2 afforded organotrifluoroborate salt **78** (28 mg, 70%) as a colorless solid.

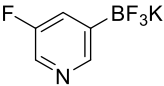
 M.p.: > 200 °C. – <sup>1</sup>H NMR (500 MHz, CD<sub>3</sub>CN): 8.40 (1 H, s), 8.18 (1 H, d, *J* = 2.6 Hz), 7.45 (1 H, d, *J* = 8.9 Hz) ppm. – <sup>13</sup>C NMR (125 MHz, CD<sub>3</sub>CN): 160.9 (d, *J* = 251.0 Hz), 149.7, 135.3 (d, *J* = 23.1 Hz), 125.5 (d, *J* = 13.7 Hz) ppm. – <sup>11</sup>B NMR (160.4 Hz, CD<sub>3</sub>CN<sub>3</sub>): 2.7 (q, *J* = 50.9 Hz) ppm. – <sup>19</sup>F NMR (470.5 Hz, CD<sub>3</sub>CN): –131.8 (d, *J* = 9.4 Hz), –142.9 (dd, *J* = 99.9, 47.9 Hz) ppm. – IR: 3342, 2138, 1634, 1553, 1407, 1364, 1320, 1258, 1228, 1159, 1078, 1004, 882 cm<sup>-1</sup>. – HRMS: calcd for C<sub>5</sub>H<sub>3</sub>BF<sub>4</sub>NK: 164.0300, found 164.0305 [M–K<sup>+</sup>].

## 2-Fluoro-5-(trifluoro- $\lambda^4$ -boraneyl)pyridine, potassium salt (**79**)<sup>[48]</sup>

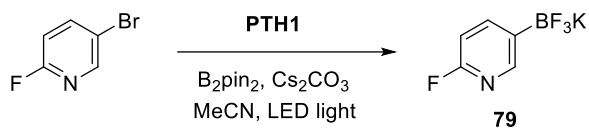

The general procedure GP1 was followed with 5-bromo-2-fluoropyridine (35 mg, 0.2 mmol), B<sub>2</sub>pin<sub>2</sub> (101 mg, 0.4 mmol, 2.0 equiv.), Cs<sub>2</sub>CO<sub>3</sub> (79 mg, 0.24 mmol, 1.2 equiv.), **PTH1** (0.8 mg, 0.004 mmol, 2 mol%) and CH<sub>3</sub>CN (2 mL). The mixture was irradiated with a 400 nm LED light for 18 h. Purification by treatment with KF, tartaric acid and then K<sub>2</sub>CO<sub>3</sub> according to GP2 afforded organotrifluoroborate salt **79** (34 mg, 85%) as a colorless solid.

M.p.: > 200 °C. – <sup>1</sup>H NMR (500 MHz, CD<sub>3</sub>CN): 8.15 (1 H, s), 7.87 (1 H, t, *J* = 8.4 Hz), 6.78 (1 H, dd, *J* = 8.0, 2.0 Hz) ppm. – <sup>13</sup>C NMR (125 MHz, CD<sub>3</sub>CN): 163.8 (d, *J* = 230.7 Hz), 150.8 (d, *J* = 12.5 Hz), 145.5 (d, *J* = 6.6 Hz), 108.1 (d, *J* = 35.5 Hz) ppm. – <sup>11</sup>B NMR (160.4 Hz, CD<sub>3</sub>CN): 3.1 (q, *J* = 49.6 Hz) ppm. – <sup>19</sup>F NMR (470.5 Hz, CD<sub>3</sub>CN): –75.1, –142.8 (dd, *J* = 97.7, 44.5 Hz) ppm. – IR: 3335, 1737, 1638, 1594, 1478, 1347, 1307, 1249, 1204, 1123, 965 cm<sup>-1</sup>.

## Methyl 5-(trifluoro- $\lambda^4$ -boraneyl)nicotinate, potassium salt (**80**)

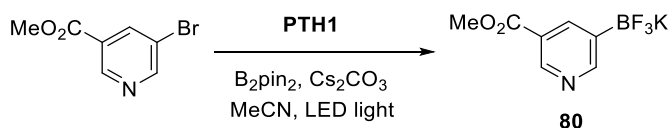

The general procedure GP1 was followed with methyl 5-bromonicotinate (43 mg, 0.2 mmol), B<sub>2</sub>pin<sub>2</sub> (101 mg, 0.4 mmol, 2.0 equiv.), Cs<sub>2</sub>CO<sub>3</sub> (79 mg, 0.24 mmol, 1.2 equiv.), **PTH1** (0.8 mg, 0.004 mmol, 2 mol%) and CH<sub>3</sub>CN (2 mL). The mixture was irradiated with a 400 nm LED light for 18 h. Purification by treatment with KF, tartaric acid and then K<sub>2</sub>CO<sub>3</sub> according to GP2 afforded organotrifluoroborate salt **80** (33 mg, 69%) as a colorless solid.

M.p.: > 200 °C. – <sup>1</sup>H NMR (500 MHz, DMSO): 8.83 (1 H, s), 8.66 (1 H, s), 8.17 (1 H, s), 3.85 (3 H, s) ppm. – <sup>13</sup>C NMR (125 MHz, DMSO): 166.5,

156.5, 147.4, 139.4, 124.1, 52.0 ppm. –  $^{11}\text{B}$  NMR (160.4 Hz, DMSO): 2.7 ppm. –  $^{19}\text{F}$  NMR (470.5 Hz, DMSO): -139.7 ppm. – IR: 3247, 2575, 2436, 2359, 2340, 1684, 1640, 1585, 1541, 1494, 1366, 1347, 1310, 1231, 1195, 1135, 1078  $\text{cm}^{-1}$ . – HRMS: calcd for  $\text{C}_7\text{H}_6\text{BF}_3\text{NO}_2$ : 204.0449, found 204.0449 [M-K<sup>+</sup>].

### Methyl 6-(trifluoro- $\lambda^4$ -boraneyl)picolinate, potassium salt (**81**)

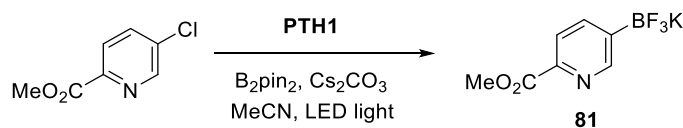

The general procedure GP1 was followed with methyl 5-chloropicolinate (34 mg, 0.2 mmol),  $\text{B}_2\text{pin}_2$  (101 mg, 0.4 mmol, 2.0 equiv.),  $\text{Cs}_2\text{CO}_3$  (79 mg, 0.24 mmol, 1.2 equiv.), **PTH1** (0.8 mg, 0.004 mmol, 2 mol%) and  $\text{CH}_3\text{CN}$  (2 mL). The mixture was irradiated with a 400 nm LED light for 18 h. Purification by treatment with KF, tartaric acid and then  $\text{K}_2\text{CO}_3$  according to GP2 afforded organotrifluoroborate salt **81** (22 mg, 44%) as a colorless solid.

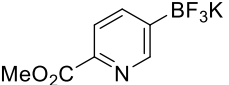
 M.p.: > 200 °C. –  $^1\text{H}$  NMR (500 MHz,  $\text{CD}_3\text{CN}$ ): 8.73 (1 H, d,  $J = 7.5$  Hz), 8.66 (1 H, s), 8.34 (1 H, d,  $J = 7.7$  Hz), 4.06 (3 H, s) ppm. –  $^{13}\text{C}$  NMR (125 MHz,  $\text{CD}_3\text{CN}$ ): 160.6, 151.7, 144.4, 136.9, 126.8, 54.5 ppm. –  $^{11}\text{B}$  NMR (160.4 Hz,  $\text{CD}_3\text{CN}$ ): 2.7 (q,  $J = 47.0$  Hz) ppm. –  $^{19}\text{F}$  NMR (470.5 Hz,  $\text{CD}_3\text{CN}$ ): -144.3 (dd,  $J = 79.1, 41.3$  Hz) ppm. – IR: 1716, 1614, 1562, 1508, 1464, 1398, 1357, 1326, 1265, 1143, 1107, 1096, 1021, 962  $\text{cm}^{-1}$ . – HRMS: calcd for  $\text{C}_7\text{H}_6\text{BF}_3\text{NO}_2$ : 204.0449, found 204.0445 [M-K<sup>+</sup>].

### (6-Cyanopyridin-3-yl)boronic acid (**82**)<sup>[49]</sup>

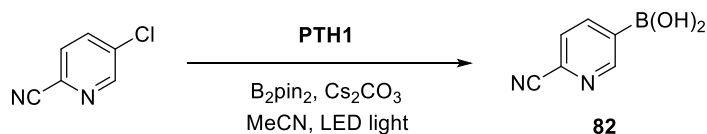

The general procedure GP1 was followed with 5-chloropicolinonitrile (28 mg, 0.2 mmol), B<sub>2</sub>pin<sub>2</sub> (101 mg, 0.4 mmol, 2.0 equiv.), Cs<sub>2</sub>CO<sub>3</sub> (132 mg, 0.4 mmol, 2.0 equiv.), PTH1 (0.8 mg, 0.04 mmol, 2 mol%) and CH<sub>3</sub>CN (2 mL). The mixture was irradiated with a 400 nm LED light for 48 h. Purification by treatment with methylboronic acid and then extraction according to GP4 afforded boronic acid **82** (17 mg, 58%) as a colorless oil.

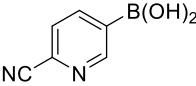 <sup>1</sup>H NMR (500 MHz, CD<sub>3</sub>OD): 8.72 (1 H, s), 8.03 (1 H, d, *J* = 8.3 Hz), 7.65 (1 H, d, *J* = 7.5 Hz) ppm. – <sup>13</sup>C NMR (125 MHz, CD<sub>3</sub>OD): 156.6, 143.5, 130.4, 128.5, 119.1 ppm. – <sup>11</sup>B NMR (160.4 Hz, CD<sub>3</sub>OD): 3.9 ppm. – IR: 3339, 2946, 2835, 2497, 2242, 2074, 1646, 1449, 1314, 1204, 1118, 1021 cm<sup>-1</sup>.

### 3-(Trifluoro-λ<sup>4</sup>-boraneyl)-5-(trifluoromethyl)pyridine, potassium salt (**83**)<sup>[50]</sup>

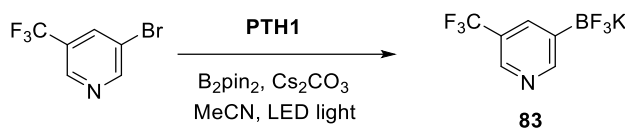

The general procedure GP1 was followed with 3-bromo-5-(trifluoromethyl)pyridine (45 mg, 0.2 mmol), B<sub>2</sub>pin<sub>2</sub> (101 mg, 0.4 mmol, 2.0 equiv.), Cs<sub>2</sub>CO<sub>3</sub> (79 mg, 0.24 mmol, 1.2 equiv.), PTH1 (0.4 mg, 0.002 mmol, 1 mol%) and CH<sub>3</sub>CN (2 mL). The mixture was irradiated with a 400 nm LED light for 18 h. Purification by treatment with KF, tartaric acid and then K<sub>2</sub>CO<sub>3</sub> according to GP2 afforded organotrifluoroborate salt **83** (39 mg, 78%) as a colorless solid.

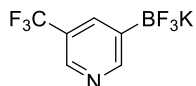 M.p.: > 200 °C. – <sup>1</sup>H NMR (500 MHz, CD<sub>3</sub>CN): 8.80 (1 H, s), 8.64 (1 H, s), 7.98 (1 H, s) ppm. – <sup>13</sup>C NMR (125 MHz, CD<sub>3</sub>CN): 150.5, 143.7, 139.8 (d, *J* = 4.5 Hz), 128.3 (q, *J* = 32.4, 31.9 Hz), 124.0 (q, *J* = 271.9 Hz) ppm. – <sup>11</sup>B NMR (160.4 Hz, CD<sub>3</sub>CN): 2.7 (q, *J* = 49.9 Hz) ppm. – <sup>19</sup>F NMR (470.5 Hz, CD<sub>3</sub>CN): –63.4, –144.2 (dd, *J* = 89.7, 42.3 Hz) ppm. – IR: 3418, 1738, 1646, 1596, 1344, 1321, 1216, 1175, 1128, 1091 cm<sup>-1</sup>.

### *N*-(5-(Trifluoro- $\lambda^4$ -boraneyl)pyridin-2-yl)acetamide, potassium salt (**84**)

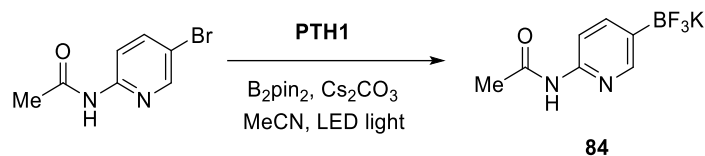

The general procedure GP1 was followed with *N*-(5-bromopyridin-2-yl)acetamide (43 mg, 0.2 mmol), B<sub>2</sub>pin<sub>2</sub> (101 mg, 0.4 mmol, 2.0 equiv.), Cs<sub>2</sub>CO<sub>3</sub> (79 mg, 0.24 mmol, 1.2 equiv.), **PTH1** (0.4 mg, 0.002 mmol, 1 mol%) and CH<sub>3</sub>CN (2 mL). The mixture was irradiated with a 400 nm LED light for 18 h. Purification by treatment with KF, tartaric acid and then K<sub>2</sub>CO<sub>3</sub> according to GP2 afforded organotrifluoroborate salt **84** (41 mg, 85%) as a colorless solid.

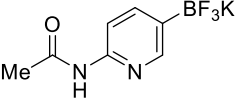 M.p.: > 200 °C. – <sup>1</sup>H NMR (500 MHz, (CD<sub>3</sub>)<sub>2</sub>CO): 8.35 (1 H, s), 8.19 (1 H, d, *J* = 8.1 Hz), 7.57 (1 H, d, *J* = 8.2 Hz), 2.26 (3 H, s) ppm. – <sup>13</sup>C NMR (125 MHz, (CD<sub>3</sub>)<sub>2</sub>CO): 171.8, 148.6, 147.5, 144.6, 113.8, 24.2 ppm. – <sup>11</sup>B NMR (160.4 Hz, (CD<sub>3</sub>)<sub>2</sub>CO): 2.5 ppm. – <sup>19</sup>F NMR (470.5 Hz, (CD<sub>3</sub>)<sub>2</sub>CO): –143.2 ppm. – IR: 3247, 2581, 2441, 1694, 1639, 1585, 1541, 1494, 1366, 1310, 1232, 1194, 1135, 1024, 973 cm<sup>-1</sup>. – HRMS: calcd for C<sub>7</sub>H<sub>7</sub>BF<sub>3</sub>N<sub>2</sub>O: 203.0609, found 203.0606 [M–K<sup>+</sup>].

### 5-(Trifluoro- $\lambda^4$ -boraneyl)quinoline, potassium salt (**85**)<sup>[47]</sup>

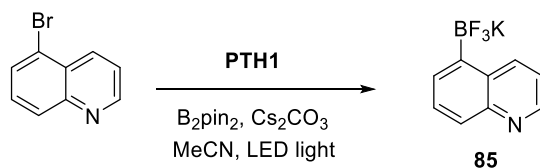

The general procedure GP1 was followed with 5-bromoquinoline (43 mg, 0.2 mmol), B<sub>2</sub>pin<sub>2</sub> (101 mg, 0.4 mmol, 2.0 equiv.), Cs<sub>2</sub>CO<sub>3</sub> (132 mg, 0.4 mmol, 2.0 equiv.), **PTH1** (0.4 mg, 0.002 mmol, 1 mol%) and CH<sub>3</sub>CN (2 mL). The mixture was irradiated with a 400 nm LED light for 18 h. Purification by treatment with KF, tartaric acid and then K<sub>2</sub>CO<sub>3</sub> according to GP2 afforded organotrifluoroborate salt **85** (34 mg, 73%) as a colorless solid.



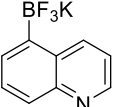
 M.p.: > 200 °C. – <sup>1</sup>H NMR (500 MHz, CD<sub>3</sub>CN): 8.81 (1 H, d, *J* = 8.5 Hz), 8.75 (1 H, dd, *J* = 4.1, 1.7 Hz), 7.81 (1 H, d, *J* = 8.3 Hz), 7.71 (1 H, d, *J* = 6.5 Hz), 7.63–7.52 (1 H, m), 7.34 (1 H, dd, *J* = 8.5, 4.1 Hz) ppm. – <sup>13</sup>C NMR (125 MHz, CD<sub>3</sub>CN): 149.7, 139.0, 130.01, 129.98, 129.5, 127.7, 120.4 ppm. – <sup>11</sup>B NMR (160.4 Hz, CD<sub>3</sub>CN): 3.6 (q, *J* = 54.8 Hz) ppm. – <sup>19</sup>F NMR (470.5 Hz, CD<sub>3</sub>CN): –138.0 (dd, *J* = 103.7, 45.7 Hz) ppm. – IR: 2943, 2357, 2253, 1975, 1632, 1558, 1444, 1374, 1246, 1153, 1037 cm<sup>-1</sup>.

### 3-(Trifluoro-λ<sup>4</sup>-boraneyl)quinoline, potassium salt (**86**)<sup>[48]</sup>

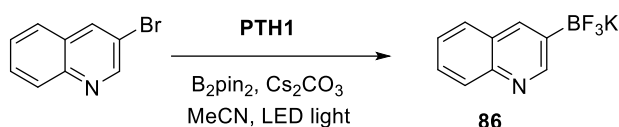

The general procedure GP1 was followed with 3-bromoquinoline (43 mg, 0.2 mmol), B<sub>2</sub>pin<sub>2</sub> (101 mg, 0.4 mmol, 2.0 equiv.), Cs<sub>2</sub>CO<sub>3</sub> (132 mg, 0.4 mmol, 2.0 equiv.), PTH1 (0.4 mg, 0.002 mmol, 1 mol%) and CH<sub>3</sub>CN (2 mL). The mixture was irradiated with a 400 nm LED light for 18 h. Purification by treatment with KF, tartaric acid and then K<sub>2</sub>CO<sub>3</sub> according to GP2 afforded organotrifluoroborate salt **86** (29 mg, 62%) as a colorless solid.

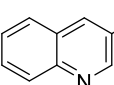
 M.p.: > 200 °C. – <sup>1</sup>H NMR (500 MHz, CD<sub>3</sub>CN): 8.97 (1 H, s), 8.23 (1 H, s), 7.95 (1 H, d, *J* = 8.4 Hz), 7.82 (1 H, d, *J* = 8.1 Hz), 7.59 (1 H, t, *J* = 8.3 Hz), 7.46 (1 H, t, *J* = 7.5 Hz) ppm. – <sup>13</sup>C NMR (125 MHz, CD<sub>3</sub>CN): 156.2, 148.1, 138.7, 129.5, 129.4, 128.7, 128.4, 126.1 ppm. – <sup>11</sup>B NMR (160.4 Hz, CD<sub>3</sub>CN): 3.2 (q, *J* = 54.2, 52.8 Hz) ppm. – <sup>19</sup>F NMR (470.5 Hz, CD<sub>3</sub>CN): –142.0 (q, *J* = 92.1, 34.2 Hz) ppm. – IR: 3020, 1619, 1597, 1571, 1493, 1418, 1354, 1325, 1280, 1173, 1127, 1029, 970 cm<sup>-1</sup>.

### 6-(Trifluoro- $\lambda^4$ -boraneyl)quinoline, potassium salt (**87**)<sup>[48]</sup>

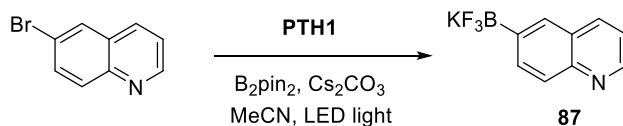

The general procedure GP1 was followed with 6-bromoquinoline (43 mg, 0.2 mmol),  $B_2pin_2$  (101 mg, 0.4 mmol, 2.0 equiv.),  $Cs_2CO_3$  (132 mg, 0.4 mmol, 2.0 equiv.), **PTH1** (0.4 mg, 0.002 mmol, 1 mol%) and  $CH_3CN$  (2 mL). The mixture was irradiated with a 400 nm LED light for 18 h. Purification by treatment with KF, tartaric acid and then  $K_2CO_3$  according to GP2 afforded organotrifluoroborate salt **87** (25 mg, 53%) as a colorless solid.

M.p.: > 200 °C. –  $^1H$  NMR (500 MHz,  $CD_3CN$ ): 8.75 (1 H, d,  $J = 5.4$  Hz), 8.18 (1 H, d,  $J = 8.2$  Hz), 7.92 (1 H, s), 7.86 (2 H, q,  $J = 8.4$  Hz), 7.35 (1 H, dd,  $J = 8.2, 4.2$  Hz) ppm. –  $^{13}C$  NMR (125 MHz,  $CD_3CN$ ): 149.7, 148.7, 136.7, 135.0, 130.7, 128.8, 127.5, 121.1 ppm. –  $^{11}B$  NMR (160.4 Hz,  $CD_3CN$ ): 3.4 (q,  $J = 52.0, 50.9$  Hz) ppm. –  $^{19}F$  NMR (470.5 Hz,  $CD_3CN$ ): –142.7 (dd,  $J = 95.9, 39.0$  Hz) ppm. – IR: 3373, 2969, 2231, 1738, 1697, 1621, 1573, 1498, 1457, 1365, 1345, 1309, 1229, 1168, 1120, 992  $cm^{-1}$ .

### 5-(Trifluoro- $\lambda^4$ -boraneyl)-1H-indole, potassium salt (**88**)<sup>[47]</sup>

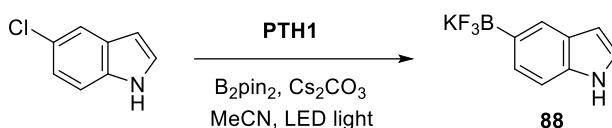

The general procedure GP1 was followed with 5-chloro-1H-indole (30 mg, 0.2 mmol),  $B_2pin_2$  (152 mg, 0.6 mmol, 3.0 equiv.),  $Cs_2CO_3$  (197 mg, 0.6 mmol, 3.0 equiv.), **PTH1** (2.0 mg, 0.01 mmol, 5 mol%) and  $CH_3CN$  (2 mL). The mixture was irradiated with a 400 nm LED light for 72 h at 45 °C. Purification by rapid chromatography then treatment with  $KHF_2$  and  $K_2CO_3$  according to GP4 afforded organotrifluoroborate salt **88** (25 mg, 55%) as a colorless solid.

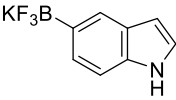
 M.p.: > 200 °C. – <sup>1</sup>H NMR (500 MHz, CD<sub>3</sub>CN): 8.99 (1 H, s), 7.65 (1 H, s), 7.41–7.21 (2 H, m), 7.11 (1 H, t, *J* = 2.7 Hz), 6.54–6.20 (1 H, m) ppm. – <sup>13</sup>C NMR (125 MHz, CD<sub>3</sub>CN): 136.2, 128.4, 126.6, 124.0, 123.6, 110.3, 102.1 ppm. – <sup>11</sup>B NMR (160.4 Hz, CD<sub>3</sub>CN): 4.2 ppm. – <sup>19</sup>F NMR (470.5 Hz, CD<sub>3</sub>CN): –140.6 ppm. – IR: 3355, 1634, 1416, 1342, 1229, 1146, 1096, 986 cm<sup>-1</sup>.

### 6-(4,4,5,5-Tetramethyl-1,3,2-dioxaborolan-2-yl)-1H-indole (**89**)<sup>[15]</sup>

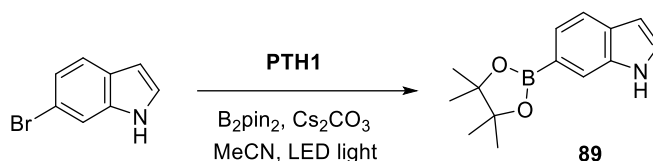

The general procedure GP1 was followed with 6-bromo-1H-indole (39 mg, 0.2 mmol), B<sub>2</sub>pin<sub>2</sub> (152 mg, 0.6 mmol, 3.0 equiv.), Cs<sub>2</sub>CO<sub>3</sub> (197 mg, 0.6 mmol, 3.0 equiv.), **PTH1** (0.8 mg, 0.004 mmol, 2 mol%) and CH<sub>3</sub>CN (2 mL). The mixture was irradiated with a 400 nm LED light for 48 h. Purification by flash chromatography on silica gel (EtOAc/hexane, 1 : 15 v/v) afford product **89** (34 mg, 70%) as a colorless liquid.

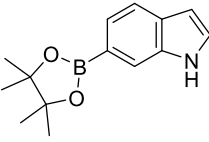
<sup>1</sup>H NMR (500 MHz, CDCl<sub>3</sub>): 8.29 (1 H, s), 7.93 (1 H, s), 7.68 (1 H, d, *J* = 7.1 Hz), 7.59 (1 H, d, *J* = 7.1 Hz), 7.26 (1 H, s), 6.58 (1 H, s), 1.40 (12 H, s) ppm. – <sup>13</sup>C NMR (125 MHz, CDCl<sub>3</sub>): 135.7, 130.5, 125.7, 125.7, 120.2, 118.2, 102.8, 83.7, 25.0 ppm. – <sup>11</sup>B NMR (160.4 Hz, CDCl<sub>3</sub>): 31.5 ppm. – IR: 2984, 2254, 1736, 1712, 1446, 1372, 1238, 1095, 1044, 916 cm<sup>-1</sup>.

### 3-(Trifluoro-λ<sup>4</sup>-boraneyl)-9H-carbazole, potassium salt (**90**)

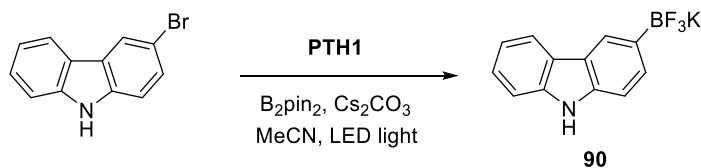

The general procedure GP1 was followed with 3-bromo-9*H*-carbazole (49 mg, 0.2 mmol), B<sub>2</sub>pin<sub>2</sub> (101 mg, 0.4 mmol, 2.0 equiv.), Cs<sub>2</sub>CO<sub>3</sub> (79 mg, 0.24 mmol, 1.2 equiv.), PTH1 (0.8 mg, 0.004 mmol, 2 mol%) and CH<sub>3</sub>CN (2 mL). The mixture was irradiated with a 400 nm LED light for 18 h. Purification by treatment with KF, tartaric acid and then K<sub>2</sub>CO<sub>3</sub> according to GP2 afforded organotrifluoroborate salt **90** (41 mg, 76%) as a colorless solid.

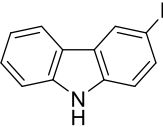 M.p.: > 200 °C. – <sup>1</sup>H NMR (500 MHz, CD<sub>3</sub>CN): 9.04 (1 H, s), 8.15 (1 H, s), 8.06 (1 H, d, *J* = 7.8 Hz), 7.52 (1 H, d, *J* = 8.0 Hz), 7.43 (1 H, d, *J* = 8.1 Hz), 7.32 (2 H, t, *J* = 7.5 Hz), 7.12 (1 H, t, *J* = 7.9 Hz) ppm. – <sup>13</sup>C NMR (125 MHz, CD<sub>3</sub>CN): 140.6, 139.9, 130.9, 125.5, 124.6, 123.4, 122.9, 120.7, 119.2, 111.3, 110.0 ppm. – <sup>11</sup>B NMR (160.4 Hz, CD<sub>3</sub>CN): 4.3 ppm. – <sup>19</sup>F NMR (470.5 Hz, CD<sub>3</sub>CN): –140.5 ppm. – IR: 3393, 3272, 1737, 1624, 1601, 1459, 1438, 1352, 1243, 1208, 1175, 1127, 1035 cm<sup>-1</sup>. – HRMS: calcd for C<sub>12</sub>H<sub>8</sub>BF<sub>3</sub>N: 234.0707, found 237.0705 [M–K<sup>+</sup>].

### 2-(Trifluoro-λ<sup>4</sup>-boraneyl)-9*H*-carbazole, potassium salt (**91**)

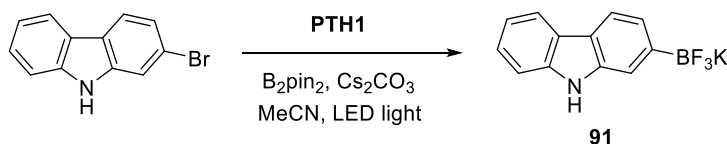

The general procedure GP1 was followed with 2-bromo-9*H*-carbazole (49 mg, 0.2 mmol), B<sub>2</sub>pin<sub>2</sub> (101 mg, 0.4 mmol, 2.0 equiv.), Cs<sub>2</sub>CO<sub>3</sub> (79 mg, 0.24 mmol, 1.2 equiv.), PTH1 (0.8 mg, 0.004 mmol, 2 mol%) and CH<sub>3</sub>CN (2 mL). The mixture was irradiated with a 400 nm LED light for 18 h. Purification by treatment with KF, tartaric acid and then K<sub>2</sub>CO<sub>3</sub> according to GP2 afforded organotrifluoroborate salt **91** (38 mg, 70%) as a colorless solid.

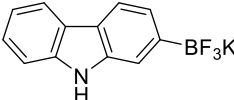 M.p.: > 200 °C. – <sup>1</sup>H NMR (500 MHz, CD<sub>3</sub>CN): 9.88 (1 H, s), 7.99 (1 H, d, *J* = 7.7 Hz), 7.86 (1 H, d, *J* = 7.7 Hz), 7.65 (1 H, s), 7.40 (2 H, dd, *J* =

7.8, 3.6 Hz), 7.26 (1 H, t,  $J = 8.0$  Hz), 7.07 (1 H, t,  $J = 7.4$  Hz) ppm. –  $^{13}\text{C}$  NMR (125 MHz,  $\text{CD}_3\text{CN}$ ): 141.1, 140.8, 124.99, 124.95, 124.3, 121.8, 120.2, 118.8, 118.6, 114.6, 111.3 ppm. –  $^{11}\text{B}$  NMR (160.4 Hz,  $\text{CD}_3\text{CN}$ ): 4.2 ppm. –  $^{19}\text{F}$  NMR (470.5 Hz,  $\text{CD}_3\text{CN}$ ): –143.0 ppm. – IR: 3410, 2969, 1737, 1625, 1497, 1458, 1436, 1365, 1324, 1274, 1227, 1216, 1166, 996  $\text{cm}^{-1}$ . – HRMS: calcd for  $\text{C}_{12}\text{H}_8\text{BF}_3\text{N}$ : 234.0707, found 237.0705 [ $\text{M}-\text{K}^+$ ].

### 5-(4,4,5,5-Tetramethyl-1,3,2-dioxaborolan-2-yl)pyrimidin-2-amine (92)<sup>[51]</sup>

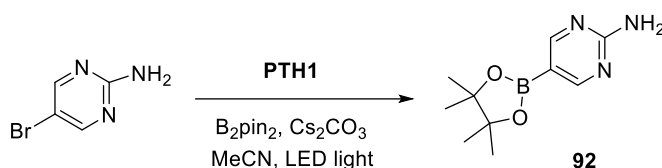

The general procedure GP1 was followed with 5-bromopyrimidin-2-amine (35 mg, 0.2 mmol),  $\text{B}_2\text{pin}_2$  (152 mg, 0.6 mmol, 3.0 equiv.),  $\text{Cs}_2\text{CO}_3$  (197 mg, 0.6 mmol, 3.0 equiv.), **PTH1** (0.8 mg, 0.004 mmol, 2 mol%) and  $\text{CH}_3\text{CN}$  (2 mL). The mixture was irradiated with a 400 nm LED light for 48 h. Purification by flash chromatography on silica gel (EtOAc) afford product **92** (25 mg, 71%) as a colorless solid.

M.p.: 208–210 °C. –  $^1\text{H}$  NMR (500 MHz,  $\text{CDCl}_3$ ): 8.59 (2 H, s), 5.38 (2 H, s), 1.32 (12 H, s) ppm. –  $^{13}\text{C}$  NMR (125 MHz,  $\text{CDCl}_3$ ): 164.7, 164.0, 83.9, 24.8 ppm. –  $^{11}\text{B}$  NMR (160.4 Hz,  $\text{CDCl}_3$ ): 30.5 ppm. – IR: 3426, 3325, 3220, 2974, 2425, 1706, 1647, 1594, 1539, 1506, 1399, 1350, 1298, 1222, 1140, 1119  $\text{cm}^{-1}$ .

### 2-Methyl-5-(trifluoro- $\lambda^4$ -boraneyl)pyrimidine, potassium salt (93)

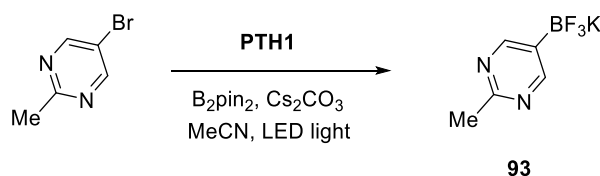

The general procedure GP1 was followed with 5-bromo-2-methylpyrimidine (35 mg, 0.2 mmol), B<sub>2</sub>pin<sub>2</sub> (101 mg, 0.4 mmol, 2.0 equiv.), Cs<sub>2</sub>CO<sub>3</sub> (79 mg, 0.24 mmol, 1.2 equiv.), PTH1 (0.4 mg, 0.002 mmol, 1 mol%) and CH<sub>3</sub>CN (2 mL). The mixture was irradiated with a 400 nm LED light for 18 h. Purification by treatment with KF, tartaric acid and then K<sub>2</sub>CO<sub>3</sub> according to GP2 afforded organotrifluoroborate salt **93** (34 mg, 85%) as a colorless solid.

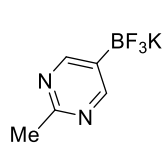

M.p.: > 200 °C. – <sup>1</sup>H NMR (500 MHz, (CD<sub>3</sub>)<sub>2</sub>CO): 8.56 (2 H, s), 2.48 (3 H, s) ppm. – <sup>13</sup>C NMR (125 MHz, (CD<sub>3</sub>)<sub>2</sub>CO): 165.2, 160.8, 25.8 ppm. – <sup>11</sup>B NMR (160.4 Hz, (CD<sub>3</sub>)<sub>2</sub>CO): 2.9 (q, *J* = 50.1 Hz) ppm. – <sup>19</sup>F NMR (470.5 Hz, (CD<sub>3</sub>)<sub>2</sub>CO): -142.8 (dd, *J* = 96.4, 48.3 Hz) ppm. – IR: 3356, 2947, 2835, 1697, 1368, 1258, 1232, 1111, 1017 cm<sup>-1</sup>. – HRMS: calcd for C<sub>5</sub>H<sub>5</sub>BF<sub>3</sub>N<sub>2</sub>: 161.0503, found 161.0500 [M-K<sup>+</sup>].

#### 2-Methoxy-5-(trifluoro-λ<sup>4</sup>-boraneyl)pyrimidine, potassium salt (**94**)<sup>[52]</sup>

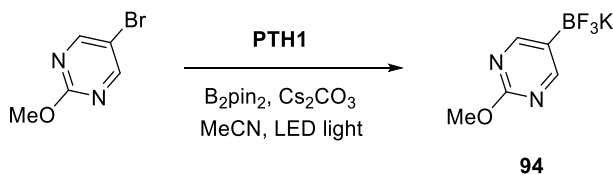

The general procedure GP1 was followed with 5-bromo-2-methoxypyrimidine (38 mg, 0.2 mmol), B<sub>2</sub>pin<sub>2</sub> (101 mg, 0.4 mmol, 2.0 equiv.), Cs<sub>2</sub>CO<sub>3</sub> (79 mg, 0.24 mmol, 1.2 equiv.), PTH1 (0.8 mg, 0.004 mmol, 2 mol%) and CH<sub>3</sub>CN (2 mL). The mixture was irradiated with a 400 nm LED light for 16 h. Purification by treatment with KF, tartaric acid and then K<sub>2</sub>CO<sub>3</sub> according to GP2 afforded organotrifluoroborate salt **94** (34 mg, 80%) as a colorless solid.

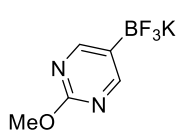

M.p.: > 200 °C. – <sup>1</sup>H NMR (500 MHz, CD<sub>3</sub>CN): 8.45 (2 H, s), 3.88 (3 H, s) ppm. – <sup>13</sup>C NMR (125 MHz, CD<sub>3</sub>CN): 165.7, 162.9, 54.4 ppm. – <sup>11</sup>B NMR (160.4 Hz, CD<sub>3</sub>CN): 2.8 (q, *J* = 50.5 Hz) ppm. – <sup>19</sup>F NMR (470.5 Hz, CD<sub>3</sub>CN): -141.9 (dd, *J* = 96.8, 45.7 Hz) ppm. – IR: 3352, 1748, 1848, 1589, 1474, 1364, 1327, 1226, 1183 cm<sup>-1</sup>.

### 5-(Trifluoro- $\lambda^4$ -boraneyl)-1*H*-pyrrolo[2,3-*b*]pyridine, potassium salt (**95**)<sup>[47]</sup>

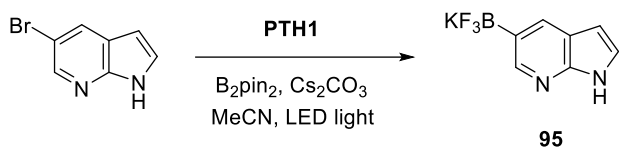

The general procedure GP1 was followed with 5-bromo-1*H*-pyrrolo[2,3-*b*]pyridine (40 mg, 0.2 mmol), B<sub>2</sub>pin<sub>2</sub> (101 mg, 0.4 mmol, 2.0 equiv.), Cs<sub>2</sub>CO<sub>3</sub> (79 mg, 0.24 mmol, 1.2 equiv.), **PTH1** (0.8 mg, 0.004 mmol, 2 mol%) and CH<sub>3</sub>CN (2 mL). The mixture was irradiated with a 400 nm LED light for 18 h. Purification by treatment with KF, tartaric acid and then K<sub>2</sub>CO<sub>3</sub> according to GP2 afforded organotrifluoroborate salt **95** (32 mg, 71%) as a colorless solid.

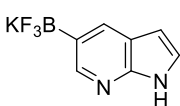

M.p.: > 200 °C. – <sup>1</sup>H NMR (500 MHz, CD<sub>3</sub>CN): 8.67 (1 H, s), 8.19 (1 H, s), 7.49 (1 H, d, *J* = 3.6 Hz), 6.73 (1 H, d, *J* = 3.6 Hz) ppm. – <sup>13</sup>C NMR (125 MHz, CD<sub>3</sub>CN): 143.0, 138.5, 135.4, 128.5, 126.8, 103.5 ppm. – <sup>11</sup>B NMR (160.4 Hz, CD<sub>3</sub>CN): 2.6 (q, *J* = 47.7 Hz) ppm. – <sup>19</sup>F NMR (470.5 Hz, CD<sub>3</sub>CN): –142.7 (dd, *J* = 92.0, 41.0 Hz) ppm. – IR: 3295, 2926, 2854, 1735, 1703, 1644, 1601, 1580, 1507, 1409, 1351, 1270, 1234, 1141, 1104, 1020 cm<sup>-1</sup>.

### 2-(Benzo[*b*]thiophen-6-yl)-4,4,5,5-tetramethyl-1,3,2-dioxaborolane (**96**)<sup>[53]</sup>

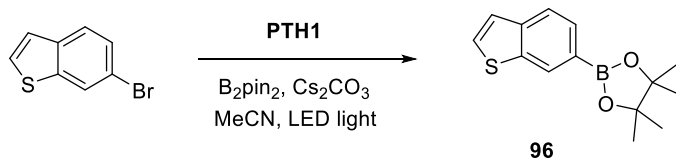

The general procedure GP1 was followed with 6-bromobenzo[*b*]thiophene (43 mg, 0.2 mmol), B<sub>2</sub>pin<sub>2</sub> (152 mg, 0.6 mmol, 3.0 equiv.), Cs<sub>2</sub>CO<sub>3</sub> (197 mg, 0.6 mmol, 3.0 equiv.), **PTH1** (0.8 mg, 0.004 mmol, 2 mol%) and CH<sub>3</sub>CN (2 mL). The mixture was irradiated with a 400

nm LED light for 48 h. Purification by flash chromatography on silica gel (EtOAc/hexane, 1 : 15 v/v) afford product **96** (37 mg, 72%) as a colorless liquid.

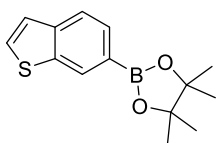

$^1\text{H NMR}$  (500 MHz,  $\text{CDCl}_3$ ): 8.39 (1 H, s), 7.83 (1 H, d,  $J = 7.9$  Hz), 7.79 (1 H, d,  $J = 8.0$  Hz), 7.52 (1 H, d,  $J = 5.4$  Hz), 7.35 (1 H, d,  $J = 5.4$  Hz), 1.38 (12 H, s) ppm. –  $^{13}\text{C NMR}$  (125 MHz,  $\text{CDCl}_3$ ): 141.9, 139.4, 129.9, 129.7, 128.3, 124.0, 123.1, 84.0, 25.0 ppm. –  $^{11}\text{B NMR}$  (160.4 Hz,  $\text{CDCl}_3$ ): 31.5 ppm. – IR: 2979, 1709, 1596, 1488, 1417, 1353, 1324, 1285, 1253, 1219, 1143, 1103, 1077, 1047  $\text{cm}^{-1}$ .

### 2-(Dibenzo[*b,d*]furan-2-yl)-4,4,5,5-tetramethyl-1,3,2-dioxaborolane (**97**)<sup>[54]</sup>

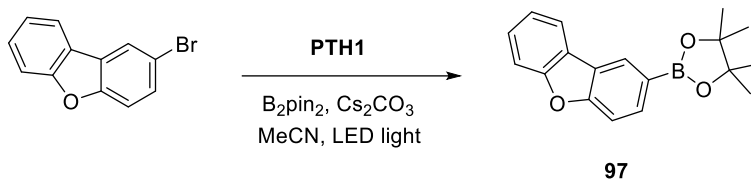

The general procedure GP1 was followed with 2-bromodibenzo[*b,d*]furan (50 mg, 0.2 mmol),  $\text{B}_2\text{pin}_2$  (101 mg, 0.4 mmol, 2.0 equiv.),  $\text{Cs}_2\text{CO}_3$  (132 mg, 0.4 mmol, 2.0 equiv.), **PTH1** (2.0 mg, 0.01 mmol, 5 mol%) and  $\text{CH}_3\text{CN}$  (2 mL). The mixture was irradiated with a 400 nm LED light for 48 h. Purification by flash chromatography on silica gel (EtOAc/hexane, 1 : 15 v/v) afford product **97** (47 mg, 80%) as a colorless solid.

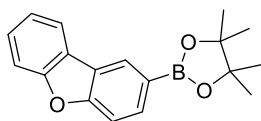

M.p.: 57–59 °C. –  $^1\text{H NMR}$  (500 MHz,  $\text{CDCl}_3$ ): 8.47 (1 H, s), 7.98 (1 H, d,  $J = 7.6$  Hz), 7.95 (1 H, d,  $J = 8.2$  Hz), 7.58 (2 H, d,  $J = 8.2$  Hz), 7.51–7.42 (1 H, m), 7.36 (1 H, t,  $J = 7.5$  Hz), 1.41 (12 H, s) ppm. –  $^{13}\text{C NMR}$  (125 MHz,  $\text{CDCl}_3$ ): 158.5, 156.3, 134.0, 127.9, 127.2, 124.2, 124.1, 123.0, 122.8, 120.9, 120.8, 111.8, 111.3, 84.0, 25.1 ppm. –  $^{11}\text{B NMR}$  (160.4 Hz,  $\text{CDCl}_3$ ): 31.2 ppm. – IR: 3508, 2978, 1710, 1600, 1586, 1450, 1423, 1354, 1336, 1301, 1204, 1143, 1106, 1023, 962  $\text{cm}^{-1}$ .



### 6-(4,4,5,5-Tetramethyl-1,3,2-dioxaborolan-2-yl)benzo[*d*]thiazole (**98**)<sup>[55]</sup>

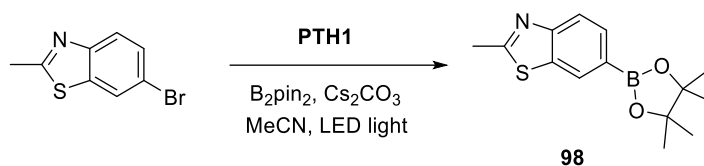

The general procedure GP1 was followed with 6-bromo-2-methylbenzo[*d*]thiazole (46 mg, 0.2 mmol), B<sub>2</sub>pin<sub>2</sub> (101 mg, 0.4 mmol, 2.0 equiv.), Cs<sub>2</sub>CO<sub>3</sub> (132 mg, 0.4 mmol, 2.0 equiv.), **PTH1** (0.4 mg, 0.002 mmol, 1 mol%) and CH<sub>3</sub>CN (2 mL). The mixture was irradiated with a 400 nm LED light for 48 h. Purification by flash chromatography on silica gel (EtOAc/hexane, 1 : 15 v/v) afford product **98** (39 mg, 70%) as a colorless solid.

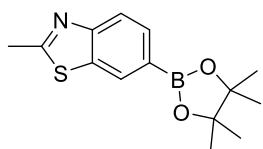

M.p.: 50–52 °C. – <sup>1</sup>H NMR (500 MHz, CDCl<sub>3</sub>): 8.38 (1 H, s), 7.81 (1 H, d, *J* = 7.9 Hz), 7.75 (1 H, d, *J* = 8.0 Hz), 2.83 (3 H, s), 1.36 (12 H, s) ppm. – <sup>13</sup>C NMR (125 MHz, CDCl<sub>3</sub>): 166.6, 153.3, 139.0, 130.5, 129.1, 120.9, 84.1, 25.0, 20.3 ppm. – <sup>11</sup>B NMR (160.4 Hz, CDCl<sub>3</sub>): 31.2 ppm. – IR: 2981, 1736, 1602, 1459, 1409, 1372, 1356, 1238, 1167, 1143, 1079, 1045, 964 cm<sup>-1</sup>.

### 2-(Benzofuran-5-yl)-4,4,5,5-tetramethyl-1,3,2-dioxaborolane (**99**)<sup>[56]</sup>

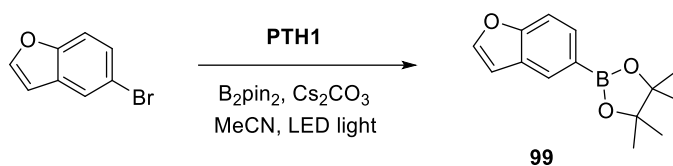

The general procedure GP1 was followed with 5-bromobenzofuran (40 mg, 0.2 mmol), B<sub>2</sub>pin<sub>2</sub> (152 mg, 0.6 mmol, 3.0 equiv.), Cs<sub>2</sub>CO<sub>3</sub> (132 mg, 0.4 mmol, 2.0 equiv.), **PTH1** (0.8 mg, 0.004 mmol, 2 mol%) and CH<sub>3</sub>CN (2 mL). The mixture was irradiated with a 400 nm LED light for 48 h. Purification by flash chromatography on silica gel (EtOAc/hexane, 1 : 15 v/v) afford product **99** (28 mg, 57%) as a colorless liquid.

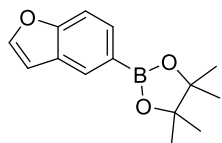

$^1\text{H}$  NMR (500 MHz,  $\text{CDCl}_3$ ): 8.12 (1 H, s), 7.77 (1 H, d,  $J = 8.3$  Hz), 7.62 (1 H, d,  $J = 2.2$  Hz), 7.51 (1 H, d,  $J = 8.3$  Hz), 6.77 (1 H, d,  $J = 2.1$  Hz), 1.37 (12 H, s) ppm. –  $^{13}\text{C}$  NMR (125 MHz,  $\text{CDCl}_3$ ): 157.2, 145.0, 130.9, 128.8, 127.2, 111.0, 106.8, 83.9, 25.0 ppm. –  $^{11}\text{B}$  NMR (160.4 Hz,  $\text{CDCl}_3$ ): 31.2 ppm. – IR: 2978, 1610, 1539, 1473, 1431, 1371, 1354, 1288, 1264, 1146, 1129, 1109, 1068, 1029  $\text{cm}^{-1}$ .

#### 4,4,5,5-Tetramethyl-2-(5-methylthiophen-3-yl)-1,3,2-dioxaborolane (**100**)<sup>[57]</sup>

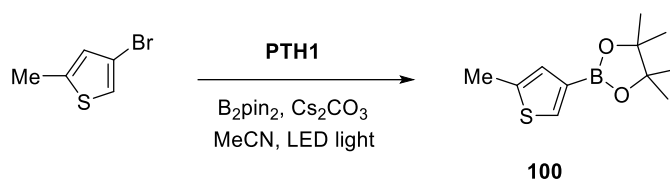

The general procedure GP1 was followed with methyl 4-bromo-2-methylthiophene (35 mg, 0.2 mmol),  $\text{B}_2\text{pin}_2$  (152 mg, 0.6 mmol, 3.0 equiv.),  $\text{Cs}_2\text{CO}_3$  (197 mg, 0.6 mmol, 3.0 equiv.), **PTH1** (2.0 mg, 0.01 mmol, 5 mol%) and  $\text{CH}_3\text{CN}$  (2 mL). The mixture was irradiated with a 400 nm LED light for 48 h at 45  $^\circ\text{C}$ . Purification by flash chromatography on silica gel (EtOAc/hexane, 1 : 15 v/v) afford product **100** (23 mg, 52%) as a colorless liquid.

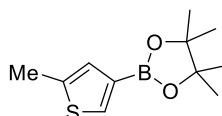

$^1\text{H}$  NMR (500 MHz,  $\text{CDCl}_3$ ): 7.67 (1 H, s), 7.04 (1 H, s), 2.49 (3 H, s), 1.32 (12 H, s) ppm. –  $^{13}\text{C}$  NMR (125 MHz,  $\text{CDCl}_3$ ): 140.0, 134.9, 130.2, 83.7, 25.0, 14.9 ppm. –  $^{11}\text{B}$  NMR (160.4 Hz,  $\text{CDCl}_3$ ): 28.9 ppm. – IR: 2984, 1731, 1447, 1372, 1236, 1143, 1095, 1044, 916  $\text{cm}^{-1}$ .

**2-(3-(Methoxymethyl)-4-(((2*R*,3*R*,4*S*,5*R*,6*R*)-2,3,5-trimethoxy-6-(methoxymethyl)tetrahydro-2*H*-pyran-4-yl)oxy)phenyl)-4,4,5,5-tetramethyl-1,3,2-dioxaborolane (101)**

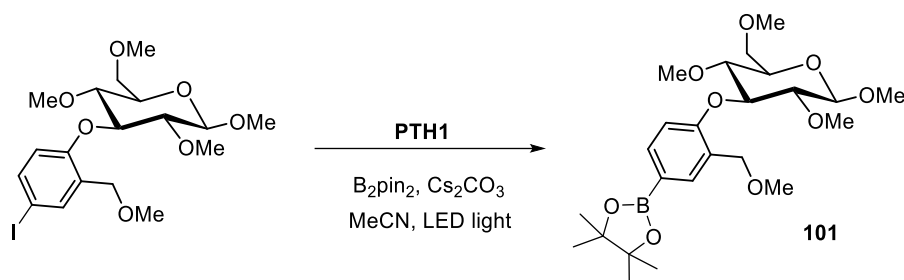

The general procedure GP1 was followed with ((2*R*,3*R*,4*S*,5*R*,6*R*)-4-(4-iodo-2-(methoxymethyl)phenoxy)-2,3,5-trimethoxy-6-(methoxymethyl)tetrahydro-2*H*-pyran (96 mg, 0.2 mmol), B<sub>2</sub>pin<sub>2</sub> (101 mg, 0.4 mmol, 2.0 equiv.), Cs<sub>2</sub>CO<sub>3</sub> (132 mg, 0.4 mmol, 2.0 equiv.), **PTH1** (0.8 mg, 0.004 mmol, 2 mol%) and CH<sub>3</sub>CN (2 mL). The mixture was irradiated with a 400 nm LED light for 24 h. Purification by prep TLC (EtOAc/hexane, 1 : 7 v/v) afford product **101** (50 mg, 52%) as a colorless oil.

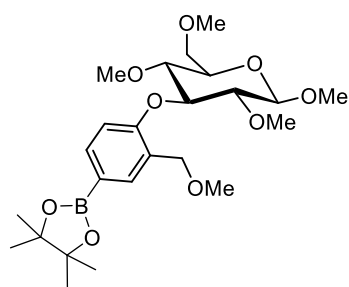

$[\alpha]_D = -55$  (*c* 0.13M, CHCl<sub>3</sub>). – <sup>1</sup>H NMR (500 MHz, CDCl<sub>3</sub>): 7.82 (1 H, s), 7.69 (1 H, d, *J* = 8.2 Hz), 6.99 (1 H, d, *J* = 8.3 Hz), 4.88 (1 H, d, *J* = 7.5 Hz), 4.57 (1 H, d, *J* = 12.1 Hz), 4.48 (1 H, d, *J* = 12.1 Hz), 3.73–3.59 (8 H, m), 3.56 (4 H, d, *J* = 9.2 Hz), 3.37 (7 H, d, *J* = 11.3 Hz), 3.44–3.12 (2 H, m), 1.32 (12 H, s) ppm. – <sup>13</sup>C NMR (125 MHz, CDCl<sub>3</sub>): 157.5, 136.1, 136.0, 126.8, 114.0, 100.7, 86.7, 83.8, 83.7, 79.2, 75.0, 71.2, 69.4, 61.1, 60.8, 60.6, 59.5, 58.4, 25.01, 24.95 ppm. – <sup>11</sup>B NMR (160.4 Hz, CDCl<sub>3</sub>): 31.7 ppm. – IR: 2977, 2932, 1738, 1714, 1606, 1417, 1355, 1284, 1218, 1132, 1094, 1060, 990 cm<sup>-1</sup>. – HRMS: calcd for C<sub>24</sub>H<sub>40</sub>BO<sub>9</sub>: 483.2760, found 483.2764 [M+H<sup>+</sup>].

**(4aR,4a1R,5aS,8aR,8a1S,15aS)-10-(Trifluoro-14-boraneyl)-2,4a,4a1,5,5a,7,8,8a1,15,15a-decahydro-14H-4,6-methanoindolo[3,2,1-ij]oxepino[2,3,4-de]pyrrolo[2,3-h]quinolin-14-one, potassium salt (102)**

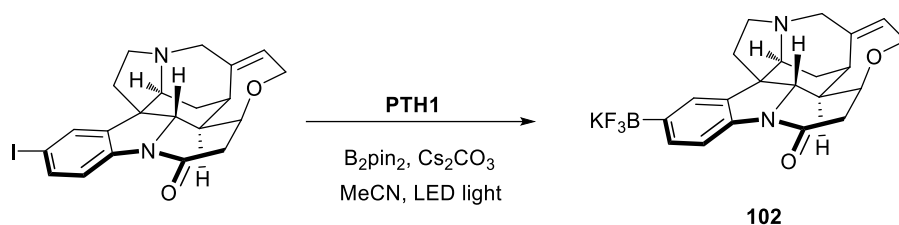

The general procedure GP1 was followed with (4aR,4a1R,5aS,8aR,8a1S,15aS)-10-iodo-2,4a,4a1,5,5a,7,8,8a1,15,15a-decahydro-14H-4,6-methanoindolo[3,2,1-ij]oxepino[2,3,4-de]pyrrolo[2,3-h]quinolin-14-one (92 mg, 0.2 mmol), B<sub>2</sub>pin<sub>2</sub> (101 mg, 0.4 mmol, 2.0 equiv.), Cs<sub>2</sub>CO<sub>3</sub> (132 mg, 0.4 mmol, 2.0 equiv.), **PTH1** (0.8 mg, 0.004 mmol, 2 mol%) and CH<sub>3</sub>CN (2 mL). The mixture was irradiated with a 400 nm LED light for 24 h. Purification by treatment with methylboronic acid and then KHF<sub>2</sub> and K<sub>2</sub>CO<sub>3</sub> according to GP4 afforded organotrifluoroborate salt **102** (44 mg, 50%) as a colorless solid.

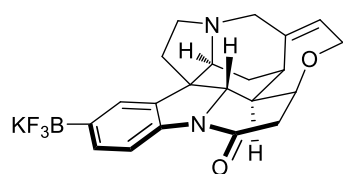

[ $\alpha$ ]<sub>D</sub> = -160 (c 0.12M, CH<sub>3</sub>CN). – M.p.: > 200 °C. – <sup>1</sup>H NMR (500 MHz, CD<sub>3</sub>CN): 7.78 (1 H, s), 7.29 (2 H, d, *J* = 7.1 Hz), 5.86 (1 H, t, *J* = 5.5 Hz), 4.26 (1 H, dt, *J* = 8.5, 3.5 Hz), 4.06 (2 H, d, *J* = 6.4 Hz), 3.97–3.87 (1 H, m), 3.77 (1 H, d, *J* = 10.6 Hz), 3.63 (1 H, d, *J* = 14.6 Hz), 3.13 (1 H, t, *J* = 3.4 Hz), 3.10–3.02 (1 H, m), 2.93 (1 H, dd, *J* = 17.1, 8.4 Hz), 2.85–2.71 (1 H, m), 2.66 (1 H, d, *J* = 14.7 Hz), 2.57 (1 H, dd, *J* = 17.1, 3.5 Hz), 2.33–2.28 (1 H, m), 1.85–1.74 (2 H, m), 1.37 (1 H, d, *J* = 16.3 Hz), 1.25 (1 H, dt, *J* = 10.6, 3.4 Hz) ppm. – <sup>13</sup>C NMR (125 MHz, CD<sub>3</sub>CN): 169.8, 141.9, 141.3, 136.4, 132.1, 127.9, 126.1, 114.9, 78.3, 64.9, 60.8, 60.8, 52.9, 52.8, 50.9, 48.8, 43.4, 42.9, 32.3, 27.4 ppm. – <sup>11</sup>B NMR (160.4 Hz, CD<sub>3</sub>CN): 3.3 ppm. – <sup>19</sup>F NMR (470.5 Hz, CDCl<sub>3</sub>): -140.5 ppm. – IR: 2944, 22261, 2112, 1645, 1599, 1481, 1423, 1386, 1333, 1306, 1215, 1146, 1104, 1048, 991 cm<sup>-1</sup>. – HRMS: calcd for C<sub>21</sub>H<sub>21</sub>BF<sub>3</sub>N<sub>2</sub>O<sub>2</sub>: 401.1654, found 401.1660 [M-K<sup>+</sup>].

**Methyl 2-((2*S*,3*R*)-2,7'-diethyl-2'-oxo-5'-(trifluoro-1*λ*-boraneyl)-4,5-dihydro-2*H*-spiro[furan-3,3'-indolin]-2-yl)acetate, potassium salt (**103**)**

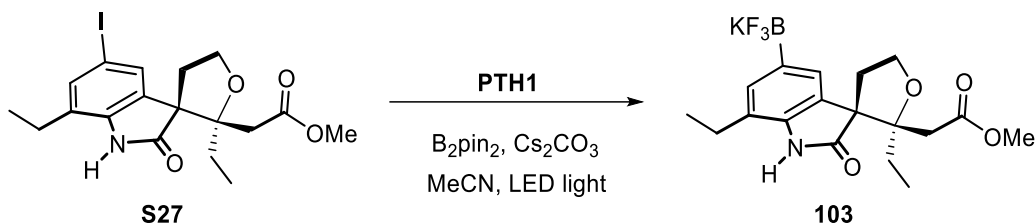

The general procedure GP1 was followed with iodide **S27**, B<sub>2</sub>pin<sub>2</sub> (152 mg, 0.6 mmol, 3.0 equiv.), Cs<sub>2</sub>CO<sub>3</sub> (132 mg, 0.4 mmol, 2.0 equiv.), **PTH1** (0.4 mg, 0.002 mmol, 1 mol%) and CH<sub>3</sub>CN (2 mL). The mixture was irradiated with a 400 nm LED light for 48 h. Purification by rapid column chromatography followed by treatment with KHF<sub>2</sub> and K<sub>2</sub>CO<sub>3</sub> according to GP4 afforded organotrifluoroborate salt **103** (44 mg, 52%) as a colorless solid.

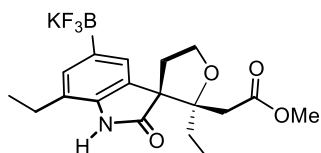

[ $\alpha$ ]<sub>D</sub> = +6.7 (*c* 0.05M, CH<sub>3</sub>CN). – m.p.: > 200 °C. – <sup>1</sup>H NMR (500 MHz, CD<sub>3</sub>CN): 8.24 (1 H, s), 7.14 (1 H, s), 7.13 (1 H, s), 4.21–4.14 (1 H, m), 4.14–4.09 (1 H, m), 3.55 (3 H, s), 2.97 (1 H, dd, *J* = 14.3, 1.2 Hz), 2.75 (1 H, d, *J* = 14.3 Hz), 2.62 (1 H, ddd, *J* = 12.7, 9.8, 7.5 Hz), 2.55 (2 H, qd, *J* = 7.4, 2.1 Hz), 2.10 (1 H, ddd, *J* = 12.8, 8.6, 4.3 Hz), 1.80 (1 H, dq, *J* = 15.2, 7.6 Hz), 1.48 (1 H, dq, *J* = 14.9, 7.4 Hz), 1.16 (3 H, t, *J* = 7.6 Hz), 0.56 (3 H, t, *J* = 7.5 Hz) ppm. – <sup>13</sup>C NMR (125 MHz, CD<sub>3</sub>CN): 178.5, 170.9, 136.1, 130.6, 129.7, 125.1, 122.9, 87.5, 64.0, 58.2, 51.2, 37.9, 36.3, 26.8, 23.6, 15.1, 8.1 ppm. – <sup>11</sup>B NMR (160.4 Hz, CD<sub>3</sub>CN): 3.5 ppm. – <sup>19</sup>F NMR (470.5 Hz, CD<sub>3</sub>CN): –141.4 ppm. – IR: 1695, 1618, 1461, 1434, 1361, 1318, 1276, 1221, 1144, 1009 cm<sup>-1</sup>. – HRMS: calcd for C<sub>18</sub>H<sub>22</sub>BF<sub>3</sub>NO<sub>3</sub>: 384.1599, found 384.1604 [M–K<sup>+</sup>].

**1-(N-Isopropylacetamido)-3-((4-(trifluoro- $\lambda^4$ -boraneyl)naphthalen-1-yl)oxy)propan-2-yl acetate, potassium salt (104)**

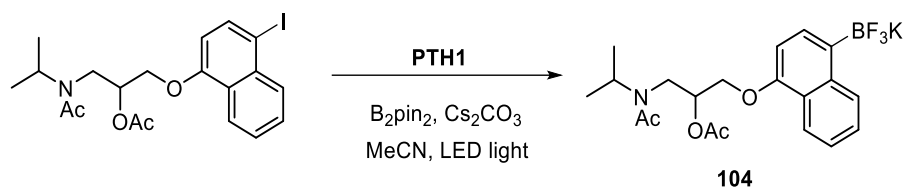

The general procedure GP1 was followed with 1-((4-iodonaphthalen-1-yl)oxy)-3-(N-isopropylacetamido)propan-2-yl acetate (90 mg, 0.2 mmol), B<sub>2</sub>pin<sub>2</sub> (101 mg, 0.4 mmol, 2.0 equiv.), Cs<sub>2</sub>CO<sub>3</sub> (132 mg, 0.4 mmol, 2.0 equiv.), **PTH1** (0.8 mg, 0.004 mmol, 2 mol%) and CH<sub>3</sub>CN (2 mL). The mixture was irradiated with a 400 nm LED light for 48 h. Purification by rapid column chromatography followed by treatment with KHF<sub>2</sub> according to GP4 afforded organotrifluoroborate salt **104** (61 mg, 68%) as a colorless solid.

M.p.: > 200 °C. – <sup>1</sup>H NMR (500 MHz, CD<sub>3</sub>CN): 8.41 (1 H, t, *J* = 7.3 Hz), 8.15 (1 H, d, *J* = 7.6 Hz), 7.57 (1 H, t, *J* = 6.7 Hz), 7.45–7.33 (2 H, m), 6.77 (1 H, dd, *J* = 19.3, 7.5 Hz), 5.71–5.42 (1 H, m), 4.48–4.00 (3 H, m), 3.88–3.27 (2 H, m), 2.47–1.76 (6 H, m), 1.42–1.08 (6 H, m) ppm. – <sup>13</sup>C NMR (125 MHz, CD<sub>3</sub>CN): 172.2, 171.9, 171.4, 171.2, 153.6, 153.4, 138.7, 138.6, 130.7, 130.6, 129.7, 126.3, 126.2, 125.6, 125.5, 124.7, 124.6, 122.0, 121.8, 105.5, 72.0, 71.4, 68.9, 68.1, 50.2, 48.2, 46.4, 42.1, 23.0, 22.4, 21.7, 21.3, 21.2, 21.0, 20.6, 20.3 ppm. – <sup>11</sup>B NMR (160.4 Hz, CD<sub>3</sub>CN): 3.9 ppm. – <sup>19</sup>F NMR (470.5 Hz, CD<sub>3</sub>CN): –138.0 ppm. – IR: 2975, 1738, 1627, 1578, 1508, 1455, 1422, 1371, 1340, 1316, 1236, 1216, 1126, 1053, 1025 cm<sup>-1</sup>. – HRMS: calcd for C<sub>20</sub>H<sub>24</sub>BF<sub>3</sub>NO<sub>4</sub>: 401.1756, found 401.1756 [M–K<sup>+</sup>].

**Methyl 2-(4-isobutyl-2-(4,4,5,5-tetramethyl-1,3,2-dioxaborolan-2-yl)phenyl)propanoate (105)**

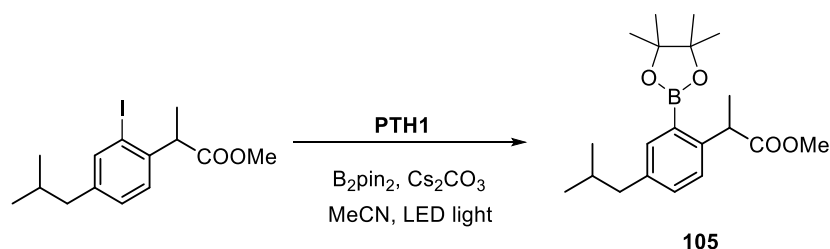

The general procedure GP1 was followed with methyl 2-(2-iodo-4-isobutylphenyl)propanoate (69 mg, 0.2 mmol), B<sub>2</sub>pin<sub>2</sub> (101 mg, 0.4 mmol, 2.0 equiv.), Cs<sub>2</sub>CO<sub>3</sub> (132 mg, 0.4 mmol, 2.0 equiv.), **PTH1** (0.4 mg, 0.002 mmol, 1 mol%) and CH<sub>3</sub>CN (2 mL). The mixture was irradiated with a 400 nm LED light for 48 h. Purification by flash chromatography on silica gel (EtOAc/hexane, 1 : 15 v/v) afford product **105** (35 mg, 50%) as a colorless liquid.

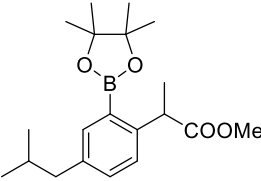

<sup>1</sup>H NMR (500 MHz, C<sub>6</sub>D<sub>6</sub>): 8.16 (1 H, s), 7.57 (1 H, d, *J* = 7.9 Hz), 7.21 (1 H, d, *J* = 9.9 Hz), 5.20 (1 H, q, *J* = 7.1 Hz), 3.41 (3 H, s, H), 2.43 (2 H, d, *J* = 7.2 Hz), 1.82 (1 H, dt, *J* = 13.5, 6.8 Hz), 1.76 (3 H, d, *J* = 7.1 Hz), 1.33 (2 H, d, *J* = 6.0 Hz), 1.22 (12 H, d, *J* = 10.6 Hz), 0.88 (6 H, d, *J* = 6.6 Hz) ppm. – <sup>13</sup>C NMR (125 MHz, C<sub>6</sub>D<sub>6</sub>): 175.6, 145.9, 139.5, 137.8, 132.7, 126.7, 83.6, 51.3, 45.2, 43.4, 30.4, 25.1, 24.9, 22.5, 19.9 ppm. – <sup>11</sup>B NMR (160.4 Hz, C<sub>6</sub>D<sub>6</sub>): 32.0 ppm. – IR: 2976, 2952, 2928, 2868, 1736, 1570, 1463, 1412, 1372, 1347, 1312, 1272, 1251, 1212, 1166, 112, 1110, 1082 cm<sup>-1</sup>. – HRMS: calcd for C<sub>20</sub>H<sub>32</sub>BO<sub>4</sub>: 347.2388, found 347.2390 [M+H<sup>+</sup>].

**Methyl 5-(2,5-dimethyl-4-(4,4,5,5-tetramethyl-1,3,2-dioxaborolan-2-yl)phenoxy)-2,2-dimethylpentanoate (106)**

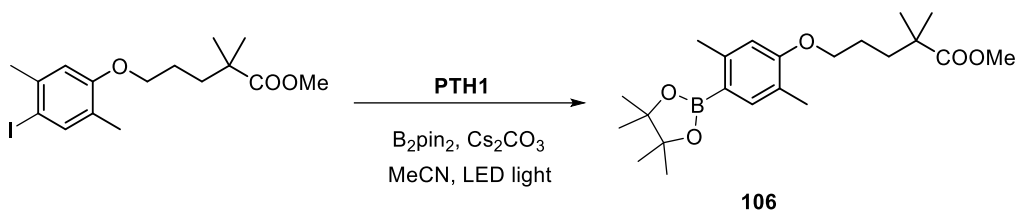

The general procedure GP1 was followed with methyl 5-(4-iodo-2,5-dimethylphenoxy)-2,2-dimethylpentanoate (78 mg, 0.2 mmol), B<sub>2</sub>pin<sub>2</sub> (101 mg, 0.4 mmol, 2.0 equiv.), Cs<sub>2</sub>CO<sub>3</sub> (132 mg, 0.4 mmol, 2.0 equiv.), **PTH1** (0.8 mg, 0.004 mmol, 2 mol%) and CH<sub>3</sub>CN (2 mL). The mixture was irradiated with a 400 nm LED light for 48 h. Purification by flash chromatography on silica gel (EtOAc/hexane, 1 : 15 v/v) afford product **106** (50 mg, 64%) as a colorless liquid.

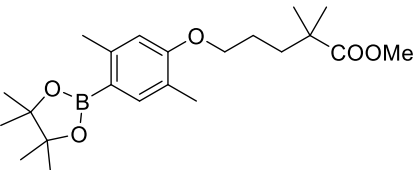

<sup>1</sup>H NMR (500 MHz, CDCl<sub>3</sub>): 7.54 (1 H, s), 6.59 (1 H, s), 3.95 (2 H, t, *J* = 5.6 Hz), 3.67 (3 H, s), 2.51 (3 H, s), 2.18 (3 H, s), 1.82–1.60 (4 H, m), 1.33 (12 H, s), 1.22 (6 H, s) ppm.  
 – <sup>13</sup>C NMR (125 MHz, CDCl<sub>3</sub>): 178.4, 159.3, 144.8, 138.4, 122.9, 112.6, 83.1, 67.8, 51.8, 42.2, 37.2, 25.3, 25.2, 25.0, 22.4, 15.6 ppm. – <sup>11</sup>B NMR (160.4 Hz, CDCl<sub>3</sub>): 31.8 ppm. – IR: 2975, 1731, 1606, 1568, 1507, 1447, 1389, 1335, 1303, 1273, 1240, 1196, 1137, 1051, 1006, 984 cm<sup>-1</sup>.  
 – HRMS: calcd for C<sub>22</sub>H<sub>36</sub>BO<sub>5</sub>: 391.2650, found 391.2653 [M+H<sup>+</sup>].

**Methyl 4-(5-(trifluoro-*l*-boraneyl)nicotinamido)butanoate, potassium salt (107)**

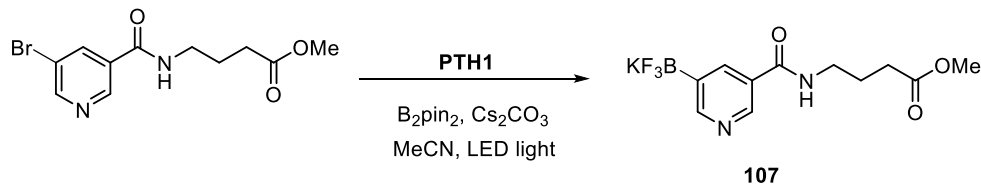

The general procedure GP1 was followed with methyl 4-(5-bromonicotinamido)butanoate (60 mg, 0.2 mmol), B<sub>2</sub>pin<sub>2</sub> (101 mg, 0.4 mmol, 2.0 equiv.),



Cs<sub>2</sub>CO<sub>3</sub> (132 mg, 0.4 mmol, 2.0 equiv.), **PTH1** (0.4 mg, 0.002 mmol, 1 mol%) and CH<sub>3</sub>CN (2.5 mL). The mixture was irradiated with a 400 nm LED light for 24 h. Purification by treatment with methylboronic acid and then 4.5M KHF<sub>2</sub> (0.12 mL, 0.54 mmol, 2.7 equiv.) and K<sub>2</sub>CO<sub>3</sub> according to GP4 afforded organotrifluoroborate salt **107** (53 mg, 81%) as a colorless solid.

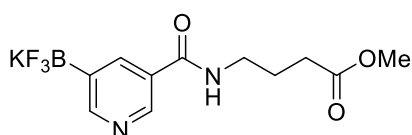

M.p.: > 200 °C. – <sup>1</sup>H NMR (500 MHz, CD<sub>3</sub>CN): 8.74 (1 H, s), 8.67 (1 H, s), 8.18 (1 H, s), 7.25 (1 H, s), 3.61 (3 H, s), 3.43–3.27 (2 H, m), 2.38 (2 H, t, *J* = 7.4 Hz), 1.85 (2 H, p, *J* = 7.1 Hz) ppm. – <sup>13</sup>C NMR (125 MHz, CD<sub>3</sub>CN): 174.6, 167.5, 154.7, 146.1, 139.0, 130.2, 52.0, 39.6, 31.9, 25.4 ppm. – <sup>11</sup>B NMR (160.4 Hz, CD<sub>3</sub>CN): 3.0 ppm. – <sup>19</sup>F NMR (470.5 Hz, CD<sub>3</sub>CN): –142.0 ppm. – IR: 3264, 1723, 1645, 1585, 1537, 1438, 1417, 1357, 1332, 1305, 1267, 1219, 1173, 977, 902 cm<sup>-1</sup>. – HRMS: calcd for C<sub>11</sub>H<sub>13</sub>BF<sub>3</sub>N<sub>2</sub>O<sub>3</sub>: 289.0977, found 289.0979 [M–K<sup>+</sup>].

**Methyl 2-(5-methoxy-2-methyl-1-(4-(4,4,5,5-tetramethyl-1,3,2-dioxaborolan-2-yl)benzoyl)-1H-indol-3-yl)acetate (**108**)<sup>[55]</sup>**

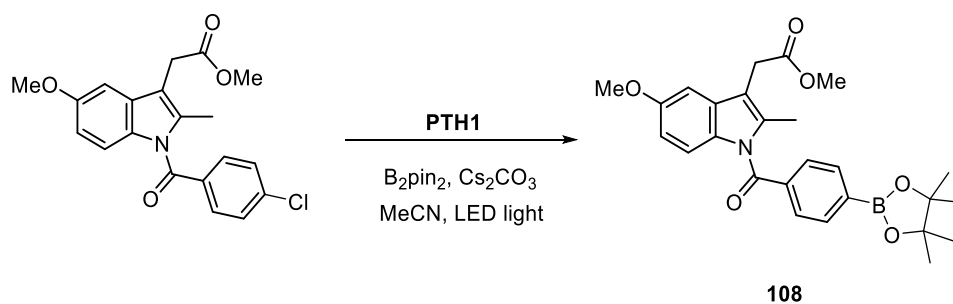

The general procedure GP1 was followed with methyl 2-(1-(4-chlorobenzoyl)-5-methoxy-2-methyl-1H-indol-3-yl)acetate (74 mg, 0.2 mmol), B<sub>2</sub>pin<sub>2</sub> (101 mg, 0.4 mmol, 2.0 equiv.), Cs<sub>2</sub>CO<sub>3</sub> (132 mg, 0.4 mmol, 2.0 equiv.), **PTH1** (0.8 mg, 0.004 mmol, 2 mol%) and CH<sub>3</sub>CN (2 mL). The mixture was irradiated with a 400 nm LED light for 48 h. Purification by prep TLC (EtOAc/hexane, 1 : 2 v/v) afforded **108** (59 mg, 64%) as a colorless liquid.

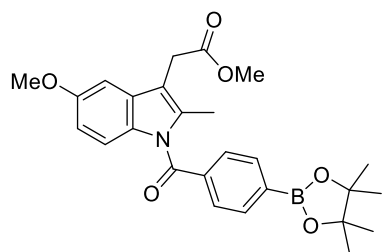

$^1\text{H}$  NMR (500 MHz,  $\text{CDCl}_3$ ): 7.91 (2 H, d,  $J = 7.9$  Hz), 7.68 (2 H, d,  $J = 8.0$  Hz), 6.95 (1 H, s), 6.89 (1 H, d,  $J = 9.0$  Hz), 6.64 (1 H, d,  $J = 6.7$  Hz), 3.83 (3 H, s), 3.70 (3 H, s), 3.66 (2 H, s), 2.36 (3 H, s), 1.38 (12 H, s) ppm. –  $^{13}\text{C}$  NMR (125 MHz,  $\text{CDCl}_3$ ): 171.5, 169.6, 156.1, 138.0, 136.2, 135.1, 131.0, 130.7, 129.8, 128.9, 128.7, 115.3, 112.5, 111.7, 111.0, 101.3, 84.5, 55.8, 52.3, 30.3, 25.0, 13.5 ppm. –  $^{11}\text{B}$  NMR (160.4 Hz,  $\text{CDCl}_3$ ): 30.9 ppm. – IR: 2981, 1739, 1709, 1613, 1477, 1436, 1397, 1322, 1267, 1218, 1166, 1142, 1088, 1036  $\text{cm}^{-1}$ .

**Ethyl 4-(8-(trifluoro- $\lambda^4$ -boraneyl)-5,6-dihydro-11*H*-benzo[5,6]cyclohepta[1,2-*b*]pyridin-11-ylidene)piperidine-1-carboxylate, potassium salt (109)**

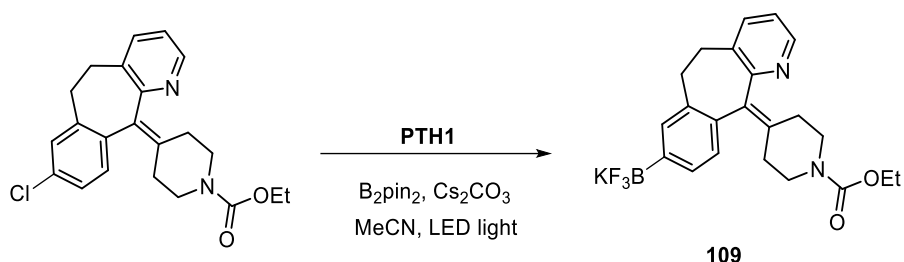

The general procedure GP1 was followed with ethyl 4-(8-chloro-5,6-dihydro-11*H*-benzo[5,6]cyclohepta[1,2-*b*]pyridin-11-ylidene)piperidine-1-carboxylate (76 mg, 0.2 mmol),  $\text{B}_2\text{pin}_2$  (152 mg, 0.6 mmol, 3.0 equiv.),  $\text{Cs}_2\text{CO}_3$  (197 mg, 0.6 mmol, 3.0 equiv.), **PTH1** (2.0 mg, 0.01 mmol, 5 mol%) and  $\text{CH}_3\text{CN}$  (2 mL). The mixture was irradiated with a 400 nm LED light for 72 h at 45  $^\circ\text{C}$ . Purification by rapid column chromatography followed by treatment with  $\text{KHF}_2$  and  $\text{K}_2\text{CO}_3$  according to GP4 afforded organotrifluoroborate salt **109** (56 mg, 62%) as a colorless solid.

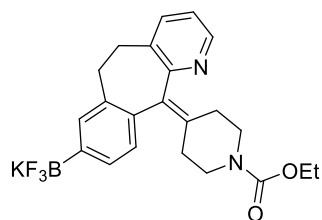

M.p.: > 200 °C. – <sup>1</sup>H NMR (500 MHz, CD<sub>3</sub>CN): 8.31 (1 H, d, *J* = 4.6 Hz), 7.50 (1 H, d, *J* = 7.6 Hz), 7.24 (1 H, s), 7.19 (1 H, d, *J* = 7.4 Hz), 7.10 (1 H, dd, *J* = 7.6, 4.8 Hz), 6.88 (1 H, d, *J* = 7.4 Hz), 4.07 (2 H, q, *J* = 7.1 Hz), 3.78–3.54 (2 H, m), 3.46–3.29 (2 H, m), 3.26–3.11 (2 H, m), 2.80 (2 H, ddd, *J* = 14.8, 11.2, 8.2 Hz), 2.39–2.29 (2 H, m), 2.17–2.05 (2 H, m), 1.20 (3 H, t, *J* = 7.1 Hz) ppm. – <sup>13</sup>C NMR (125 MHz, (CD<sub>3</sub>)<sub>2</sub>CO): 170.9, 159.7, 155.8, 146.9, 137.7, 137.5, 136.8, 135.8, 135.2, 134.9, 133.5, 130.0, 127.9, 122.5, 61.5, 60.5, 45.9, 45.8, 32.8, 32.7, 31.5, 31.4, 15.0 ppm. – <sup>11</sup>B NMR (160.4 Hz, (CD<sub>3</sub>)<sub>2</sub>CO): 3.4 ppm. – <sup>19</sup>F NMR (470.5 Hz, (CD<sub>3</sub>)<sub>2</sub>CO): –142.6 ppm. – IR: 3501, 2914, 1689, 1436, 1360, 1277, 1227, 1152, 1115, 994 cm<sup>-1</sup>. – HRMS: calcd for C<sub>22</sub>H<sub>23</sub>BF<sub>3</sub>N<sub>2</sub>O<sub>2</sub>: 415.1810, found 415.1815 [M–K<sup>+</sup>].

**(8*R*,9*S*,13*S*,14*S*)-13-Methyl-17-oxo-7,8,9,11,12,13,14,15,16,17-decahydro-6*H*-cyclopenta[*a*]phenanthren-3-yl 4-(4,4,5,5-tetramethyl-1,3,2-dioxaborolan-2-yl)benzoate (**110**)**

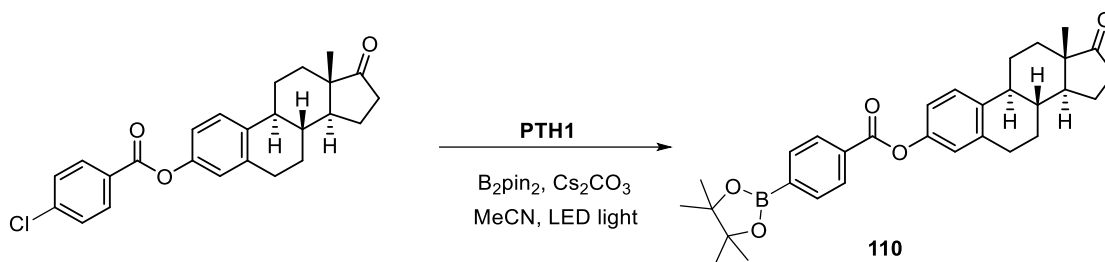

The general procedure GP1 was followed with (8*R*,9*S*,13*S*,14*S*)-13-methyl-17-oxo-7,8,9,11,12,13,14,15,16,17-decahydro-6*H*-cyclopenta[*a*]phenanthren-3-yl 4-chlorobenzoate (81 mg, 0.2 mmol), B<sub>2</sub>pin<sub>2</sub> (101 mg, 0.4 mmol, 2.0 equiv.), Cs<sub>2</sub>CO<sub>3</sub> (132 mg, 0.4 mmol, 2.0 equiv.), **PTH1** (0.8 mg, 0.004 mmol, 2 mol%) and CH<sub>3</sub>CN (2 mL). The mixture was irradiated with a 400 nm LED light for 48 h. Purification by flash chromatography on silica gel (EtOAc/hexane, 1 : 19 v/v) afford product **110** (47 mg, 47%) as a colorless oil.

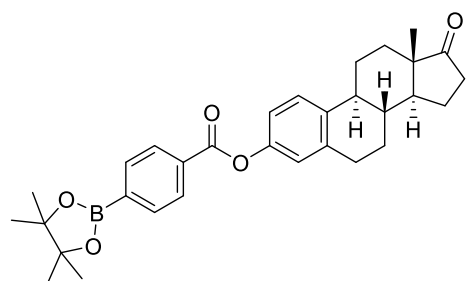

$[\alpha]_D = +103$  ( $c$  0.14M,  $\text{CHCl}_3$ ). – M.p.: > 200 °C. –  $^1\text{H}$  NMR (500 MHz,  $\text{CDCl}_3$ ): 8.16 (2 H, d,  $J = 8.0$  Hz), 7.93 (2 H, d,  $J = 7.9$  Hz), 7.33 (1 H, d,  $J = 8.5$  Hz), 6.99 (1 H, d,  $J = 8.4$  Hz), 6.95 (1 H, s), 3.13–2.79 (2 H, m), 2.51 (1 H, dd,  $J = 19.0, 8.7$  Hz), 2.43 (1 H, d,  $J = 13.6$  Hz), 2.32 (1 H, t,  $J = 10.4$  Hz), 2.22–1.89 (4 H, m), 1.81–1.43 (3 H, m), 1.37 (12 H, s), 1.26 (3 H, s), 0.92 (3 H, s) ppm. –  $^{13}\text{C}$  NMR (125 MHz,  $\text{CDCl}_3$ ): 220.9, 165.6, 148.9, 138.2, 137.6, 134.9, 131.9, 129.2, 126.6, 121.8, 119.0, 84.5, 50.6, 48.1, 44.30, 38.1, 36.0, 31.7, 29.5, 26.5, 25.9, 25.1, 25.0, 21.7, 14.0 ppm. –  $^{11}\text{B}$  NMR (160.4 Hz,  $\text{CDCl}_3$ ): 30.6 ppm. – IR: 3449, 3970, 2928, 1735, 1611, 1509, 1492, 1454, 1398, 1359, 1260, 1219, 1177, 1144, 1090, 1065, 1018  $\text{cm}^{-1}$ . – HRMS: calcd for  $\text{C}_{31}\text{H}_{37}\text{BKO}_5$ : 539.2371, found 539.2354  $[\text{M}+\text{K}^+]$ .

### 1,3-Bis(4,4,5,5-tetramethyl-1,3,2-dioxaborolan-2-yl)benzene (**111**)<sup>[58]</sup>

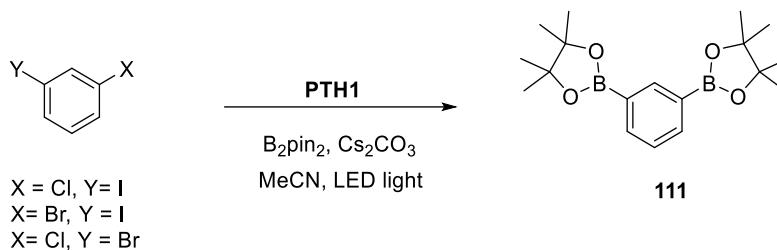

**From 1-bromo-3-iodobenzene:** The general procedure GP1 was followed with 1-bromo-3-iodobenzene (56 mg, 0.2 mmol),  $\text{B}_2\text{pin}_2$  (203 mg, 0.8 mmol, 4.0 equiv.),  $\text{Cs}_2\text{CO}_3$  (263 mg, 0.8 mmol, 4.0 equiv.), **PTH1** (0.4 mg, 0.002 mmol, 1 mol%) and  $\text{CH}_3\text{CN}$  (4 mL). The mixture was irradiated with a 400 nm LED light for 48 h. Purification by Kugelrohr distillation (150 °C, 2 h) according to GP5 afforded boronic ester **111** (37 mg, 56%) as a colorless solid.

**From 1-chloro-3-iodobenzene:** The general procedure GP1 was followed with 1-chloro-3-iodobenzene (48 mg, 0.2 mmol),  $\text{B}_2\text{pin}_2$  (203 mg, 0.8 mmol, 4.0 equiv.),  $\text{Cs}_2\text{CO}_3$  (263 mg, 0.8 mmol, 4.0 equiv.), **PTH1** (0.8 mg, 0.004 mmol, 2 mol%) and  $\text{CH}_3\text{CN}$  (4 mL). The

mixture was irradiated with a 400 nm LED light for 48 h. Purification by Kugelrohr distillation (150 °C, 2 h) according to GP5 afforded boronic ester **111** (45 mg, 68%) as a colorless solid.

**From 1-bromo-3-chlorobenzene:** The general procedure GP1 was followed with 1-bromo-3-chlorobenzene (38 mg, 0.2 mmol), B<sub>2</sub>pin<sub>2</sub> (203 mg, 0.8 mmol, 4.0 equiv.), Cs<sub>2</sub>CO<sub>3</sub> (263 mg, 0.8 mmol, 4.0 equiv.), **PTH1** (0.8 mg, 0.004 mmol, 2 mol%) and CH<sub>3</sub>CN (4 mL). The mixture was irradiated with a 400 nm LED light for 48 h. Purification by Kugelrohr distillation (150 °C, 2 h) according to GP5 afforded boronic ester **111** (37 mg, 56%) as a brown solid.

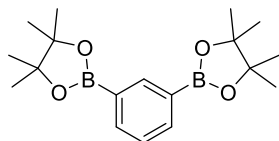

M.p.: 119–122 °C. – <sup>1</sup>H NMR (500 MHz, CDCl<sub>3</sub>): 8.28 (1 H, s), 7.90 (2 H, d, *J* = 7.4 Hz), 7.37 (1 H, t, *J* = 7.4 Hz), 1.34 (24 H, s) ppm. – <sup>13</sup>C NMR (125 MHz, CDCl<sub>3</sub>): 141.4, 137.8, 127.2, 83.9, 25.0 ppm. – <sup>11</sup>B NMR (160.4 Hz, CDCl<sub>3</sub>): 31.2 ppm. – IR: 2977, 2930, 1739, 1601, 1578, 1483, 1369, 1328, 1305, 1270, 1241, 1213, 1140, 1110, 1088, 1078, 1047 cm<sup>-1</sup>.

### 1,2-Bis(4-(4,4,5,5-tetramethyl-1,3,2-dioxaborolan-2-yl)phenyl)ethane (**112**)<sup>[59]</sup>

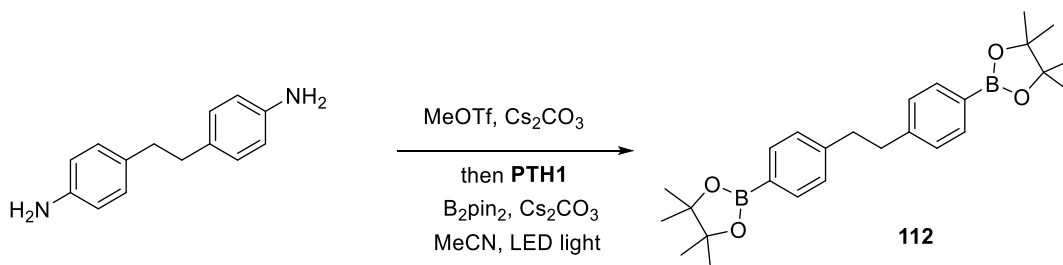

The general procedure GP6 was followed with 4,4'-(ethane-1,2-diyl)dianiline (42 mg, 0.2 mmol), Cs<sub>2</sub>CO<sub>3</sub> (263 mg, 0.8 mmol, 4 equiv.), methyl trifluoromethanesulfonate (210 mg, 1.28 mmol, 6.4 equiv.) and CH<sub>3</sub>CN (3 mL). The mixture was stirred for 20 minutes at room temperature before adding B<sub>2</sub>pin<sub>2</sub> (305 mg, 1.2 mmol, 6 equiv.), Cs<sub>2</sub>CO<sub>3</sub> (329 mg, 1.0 mmol, 5.0 equiv.), **PTH1** (4.0 mg, 0.02 mmol, 10 mol%) and CH<sub>3</sub>CN (2 mL). The mixture was

irradiated with a 400 nm LED light for 36 h. Purification by Kugelrohr distillation (150 °C, 2 h) according to GP5 afforded boronic ester **112** (62 mg, 71%) as a brown solid.

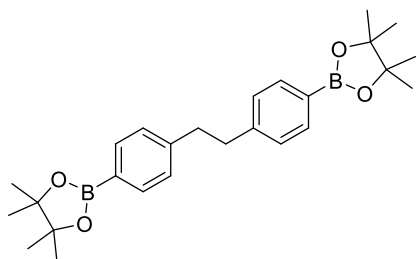

M.p.: > 200 °C. – <sup>1</sup>H NMR (500 MHz, CDCl<sub>3</sub>): 7.72 (4 H, d, *J* = 7.9 Hz), 7.19 (4 H, d, *J* = 7.9 Hz), 2.93 (4 H, s), 1.34 (24 H, s) ppm. – <sup>13</sup>C NMR (125 MHz, CDCl<sub>3</sub>): 145.2, 135.0, 128.1, 83.8, 38.1, 25.0 ppm. – <sup>11</sup>B NMR (160.4 Hz, CDCl<sub>3</sub>): 30.6 ppm. – IR: 2976, 1610, 1516, 1456, 1397, 1356, 1316,

1270, 1164, 1140, 1087, 1031, 962 cm<sup>-1</sup>.

### Bis(4-(4,4,5,5-tetramethyl-1,3,2-dioxaborolan-2-yl)phenyl)methane (**113**)<sup>[60]</sup>

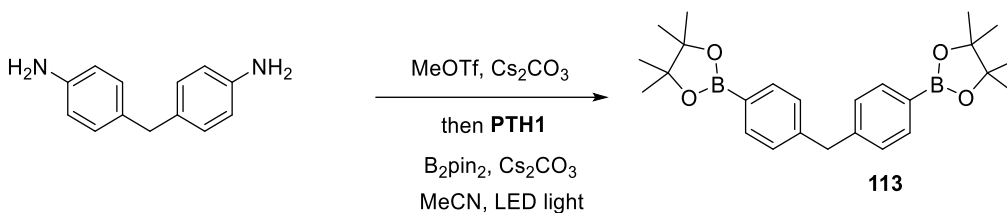

The general procedure GP6 was followed with 4,4'-methylenedianiline (40 mg, 0.2 mmol), Cs<sub>2</sub>CO<sub>3</sub> (263 mg, 0.8 mmol, 4 equiv.), methyl trifluoromethanesulfonate (210 mg, 1.28 mmol, 6.4 equiv.) and CH<sub>3</sub>CN (3 mL). The mixture was stirred for 20 minutes at room temperature before adding B<sub>2</sub>pin<sub>2</sub> (305 mg, 1.2 mmol, 6 equiv.), Cs<sub>2</sub>CO<sub>3</sub> (329 mg, 1.0 mmol, 5.0 equiv.), PTH1 (3.2 mg, 0.016 mmol, 8 mol%) and CH<sub>3</sub>CN (2 mL). The mixture was irradiated with a 420 nm LED light for 36 h. Purification by Kugelrohr distillation (150 °C, 2 h) according to GP5 afforded boronic ester **113** (75 mg, 89%) as a brown solid.

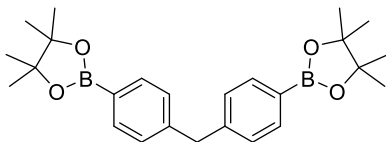

M.p.: > 200 °C. – <sup>1</sup>H NMR (500 MHz, CDCl<sub>3</sub>): 7.73 (4 H, d, *J* = 7.8 Hz), 7.19 (4 H, d, *J* = 7.8 Hz), 4.01 (2 H, s), 1.33 (24 H, s) ppm. – <sup>13</sup>C NMR (125 MHz, CDCl<sub>3</sub>): 144.2, 135.2, 128.6,

83.8, 42.4, 25.0 ppm. – <sup>11</sup>B NMR (160.4 Hz, CDCl<sub>3</sub>): 31.0 ppm. – IR: 2977, 1608, 1514, 1567, 1397, 1356, 1322, 1271, 1213, 1141, 1105, 1087, 1029, 1020, 963 cm<sup>-1</sup>.

### Ethyl 4-(5,5-dimethyl-1,3,2-dioxaborinan-2-yl)benzoate (**114**)<sup>[61]</sup>

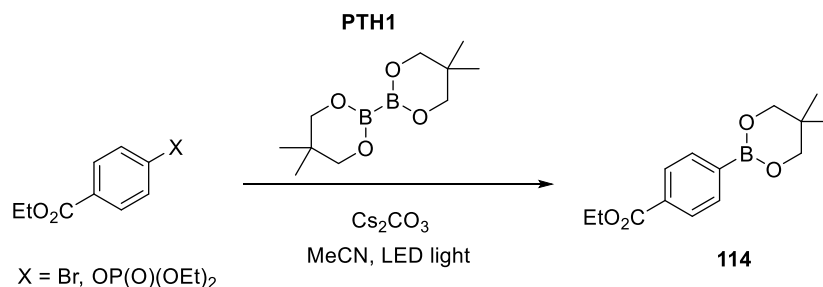

**From ethyl 4-bromobenzoate:** The general procedure GP1 was followed with ethyl 4-bromobenzoate (45 mg, 0.2 mmol), 5,5,5',5'-tetramethyl-2,2'-bi(1,3,2-dioxaborinane) (90 mg, 0.4 mmol, 2.0 equiv.), Cs<sub>2</sub>CO<sub>3</sub> (132 mg, 0.4 mmol, 2.0 equiv.), **PTH1** (0.4 mg, 0.002 mmol, 1 mol%) and CH<sub>3</sub>CN (2 mL). The mixture was irradiated with a 400 nm LED light for 24 h. Purification by flash chromatography on silica gel (EtOAc/hexane, 1 : 15 v/v) afford product **114** (43 mg, 82%) as a colorless solid.

**From ethyl 4-((diethoxyphosphoryl)oxy)benzoate:** The general procedure GP1 was followed with ethyl 4-((diethoxyphosphoryl)oxy)benzoate (60 mg, 0.2 mmol), 5,5,5',5'-tetramethyl-2,2'-bi(1,3,2-dioxaborinane) (135 mg, 0.6 mmol, 3.0 equiv.), Cs<sub>2</sub>CO<sub>3</sub> (197 mg, 0.6 mmol, 3.0 equiv.), **PTH1** (2.0 mg, 0.01 mmol, 5 mol%) and CH<sub>3</sub>CN (2 mL). The mixture was irradiated with a 400 nm LED light for 48 h. Purification by flash chromatography on silica gel (EtOAc/hexane, 1 : 19 v/v) afforded product **114** (31 mg, 60%) as a colorless solid.

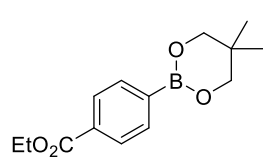

M.p.: 91–93 °C. – <sup>1</sup>H NMR (500 MHz, CDCl<sub>3</sub>): 8.01 (2 H, d, *J* = 8.2 Hz), 7.86 (2 H, d, *J* = 8.2 Hz), 4.38 (2 H, q, *J* = 7.1 Hz), 3.78 (4 H, s), 1.40 (3 H, t, *J* = 7.1 Hz), 1.03 (6 H, s) ppm. – <sup>13</sup>C NMR (125 MHz, CDCl<sub>3</sub>): 167.0, 133.9, 132.3, 128.6, 72.5, 61.1, 32.0, 22.0, 14.5 ppm. – <sup>11</sup>B NMR (160.4 Hz, CDCl<sub>3</sub>): 26.6 ppm. – IR: 2958, 1704, 1580, 1506, 1478, 1446, 1369, 1317, 1306, 1264, 1248, 1176, 1128, 1105, 1097, 1018 cm<sup>-1</sup>.

### (4-(Ethoxycarbonyl)phenyl)boronic acid (**115**)<sup>[62]</sup>

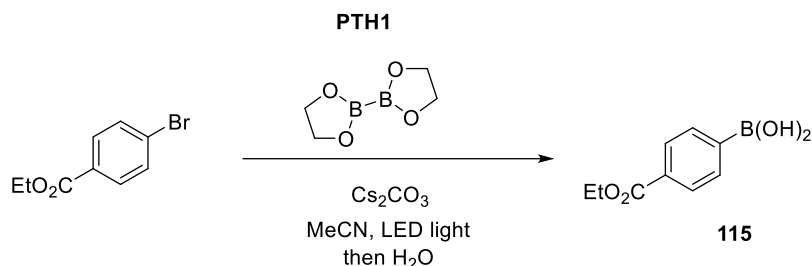

The general procedure GP1 was followed with ethyl 4-bromobenzoate (45 mg, 0.2 mmol), 2,2'-bi(1,3,2-dioxaborolane) (57 mg, 0.4 mmol, 2.0 equiv.), Cs<sub>2</sub>CO<sub>3</sub> (132 mg, 0.4 mmol, 2.0 equiv.), **PTH1** (0.4 mg, 0.002 mmol, 1 mol%) and CH<sub>3</sub>CN (2 mL). The mixture was irradiated with a 400 nm LED light for 48 h. H<sub>2</sub>O (4 mL) was added and the reaction mixture was stirred for 30 minutes at room temperature, then added a mixture of 1M aqueous solution of fructose (5 mL) and 1M aqueous solution of sodium carbonate (5 mL). Ethyl acetate (15 mL) was added, and the organic portion was separated and discarded. The aqueous phase was acidified to pH 2 using 2M aqueous solution of hydrochloric acid, then extracted with ethyl acetate (4 × 10 mL). The combined organic portions as dried over anhydrous sodium sulfate, filtered and concentrated under reduced pressure to yield the desired boronic acid **115** (28 mg, 73%) as a colorless oil.

<sup>1</sup>H NMR (500 MHz, CD<sub>3</sub>OD): 7.91 (2 H, d, *J* = 7.8 Hz), 7.73 (2 H, s), 4.34 (2 H, q, *J* = 7.1 Hz), 3.67 (2 H, s), 1.37 (3 H, t, *J* = 7.1 Hz) ppm. – <sup>13</sup>C NMR (125 MHz, CD<sub>3</sub>OD): 168.7, 134.5, 129.0, 64.5, 61.9, 14.5 ppm. – <sup>11</sup>B NMR (160.4 Hz, CD<sub>3</sub>OD): 22.3 ppm. – IR: 2970, 2919, 2871, 1719, 1614, 1509, 1401, 1362, 1310, 1287, 1237, 1208, 1178, 1096, 1077, 1021, 987 cm<sup>-1</sup>.



### Ethyl 4-(4,4,6-trimethyl-1,3,2-dioxaborinan-2-yl)benzoate (**116**)<sup>[63]</sup>

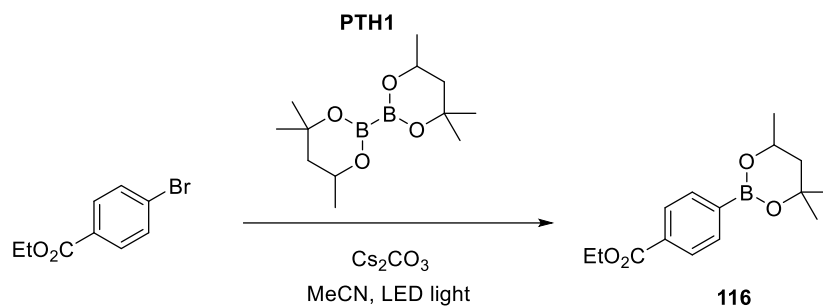

The general procedure GP1 was followed with ethyl 4-bromobenzoate (45 mg, 0.2 mmol), 4,4,4',6,6'-hexamethyl-2,2'-bi(1,3,2-dioxaborinane) (101 mg, 0.4 mmol, 2.0 equiv.), Cs<sub>2</sub>CO<sub>3</sub> (132 mg, 0.4 mmol, 2.0 equiv.), **PTH1** (0.4 mg, 0.002 mmol, 1 mol%) and CH<sub>3</sub>CN (2 mL). The mixture was irradiated with a 400 nm LED light for 24 h. Purification by flash chromatography on silica gel (EtOAc/hexane, 1 : 15 v/v) afford product **116** (40 mg, 72%) as a colorless oil.

<sup>1</sup>H NMR (500 MHz, CDCl<sub>3</sub>): 8.01 (2 H, d, *J* = 8.1 Hz), 7.88 (2 H, d, *J* = 8.1 Hz), 4.6–4.13 (3 H, m), 1.90 (1 H, dd, *J* = 13.9, 2.9 Hz), 1.73–1.55 (1 H, m), 1.43–1.37 (12 H, m) ppm. – <sup>13</sup>C NMR (125 MHz, CDCl<sub>3</sub>): 167.1, 133.8, 132.0, 128.5, 71.5, 65.3, 61.0, 46.1, 31.4, 28.3, 23.3, 14.5 ppm. – <sup>11</sup>B NMR (160.4 Hz, CDCl<sub>3</sub>): 26.7 ppm. – IR: 2918, 1718, 1614, 1510, 1401, 1263, 1267, 1237, 1108, 1096, 1021, 883 cm<sup>-1</sup>.

### Ethyl 4-(4,4,6,6-tetramethyl-1,3,2-dioxaborinan-2-yl)benzoate (**117**)

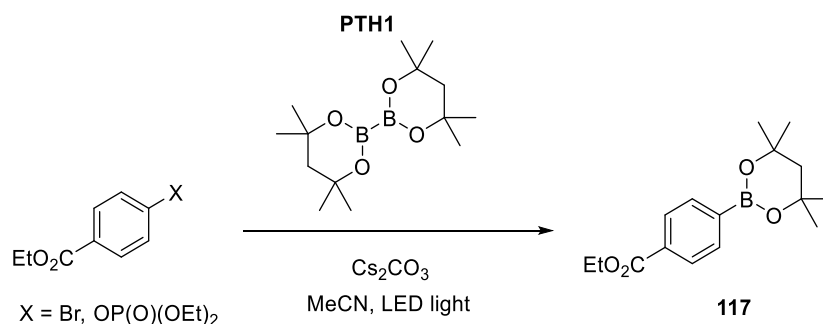

**From ethyl 4-bromobenzoate:** The general procedure GP1 was followed with ethyl 4-bromobenzoate (45 mg, 0.2 mmol), 4,4,4',4',6,6,6',6'-octamethyl-2,2'-bi(1,3,2-dioxaborinane) (112 mg, 0.4 mmol, 2.0 equiv.), Cs<sub>2</sub>CO<sub>3</sub> (132 mg, 0.4 mmol, 2.0 equiv.), **PTH1** (0.4 mg, 0.002 mmol, 1 mol%) and CH<sub>3</sub>CN (2 mL). The mixture was irradiated with a 400 nm LED light for 24 h. Purification by flash chromatography on silica gel (EtOAc/hexane, 1 : 15 v/v) afford product **117** (52 mg, 90%) as a colorless solid.

**From ethyl 4-((diethoxyphosphoryl)oxy)benzoate:** The general procedure GP1 was followed with ethyl 4-((diethoxyphosphoryl)oxy)benzoate (60 mg, 0.2 mmol), 4,4,4',4',6,6,6',6'-octamethyl-2,2'-bi(1,3,2-dioxaborinane) (168 mg, 0.6 mmol, 3.0 equiv.), Cs<sub>2</sub>CO<sub>3</sub> (197 mg, 0.6 mmol, 3.0 equiv.), **PTH1** (2.0 mg, 0.01 mmol, 5 mol%) and CH<sub>3</sub>CN (2 mL). The mixture was irradiated with a 400 nm LED light for 48 h. Purification by flash chromatography on silica gel (EtOAc/hexane, 1 : 19 v/v) afforded product **117** (31 mg, 53%) as a colorless solid.

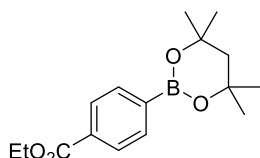

M.p.: 42–45 °C. – <sup>1</sup>H NMR (500 MHz, CDCl<sub>3</sub>): 7.99 (2 H, d, *J* = 8.2 Hz), 7.88 (2 H, d, *J* = 8.1 Hz), 4.38 (2 H, q, *J* = 7.1 Hz), 1.93 (2 H, s), 1.43 (12 H, s), 1.40 (3 H, t, *J* = 7.1 Hz) ppm. – <sup>13</sup>C NMR (125 MHz, CDCl<sub>3</sub>): 167.1, 133.8, 131.9, 128.4, 71.3, 61.0, 49.1, 31.9, 14.5 ppm. – <sup>11</sup>B NMR (160.4 Hz, CDCl<sub>3</sub>): 26.6 ppm. – IR: 2972, 2935, 1715, 1561, 1506, 1432, 1355, 1329, 1302, 1265, 1207, 1137, 1095, 1020 cm<sup>-1</sup>. – HRMS: calcd for C<sub>16</sub>H<sub>24</sub>BO<sub>4</sub>: 291.1762, found 291.1765 [M+H<sup>+</sup>].

**Ethyl 4-((3a*S*,4*S*,6*S*,7a*R*)-3a,5,5-trimethylhexahydro-4,6-methanobenzo[*d*][1,3,2]dioxaborol-2-yl)benzoate (**118**)**

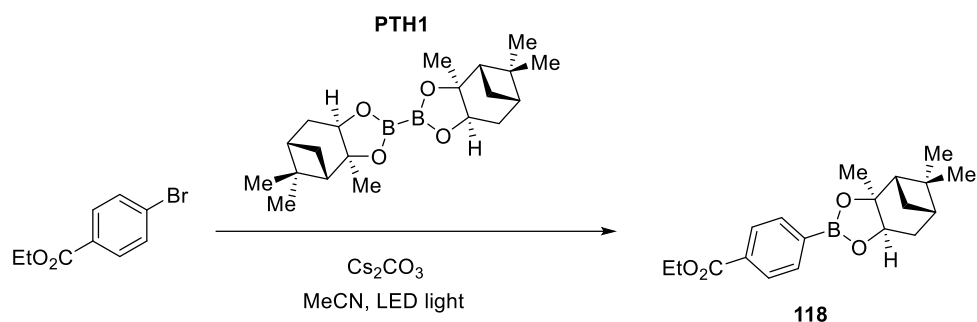

The general procedure GP1 was followed with ethyl 4-bromobenzoate (45 mg, 0.2 mmol), bis((+)-pinanediolato)diboron (143 mg, 0.4 mmol, 2.0 equiv.), Cs<sub>2</sub>CO<sub>3</sub> (132 mg, 0.4 mmol, 2.0 equiv.), **PTH1** (0.4 mg, 0.002 mmol, 1 mol%) and CH<sub>3</sub>CN (2 mL). The mixture was irradiated with a 400 nm LED light for 24 h. Purification by flash chromatography on silica gel (EtOAc/hexane, 1 : 15 v/v) afford product **118** (50 mg, 76%) as a colorless oil.

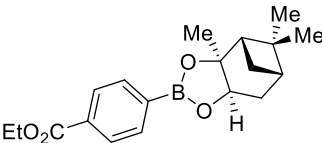 <sup>1</sup>H NMR (500 MHz, CDCl<sub>3</sub>): 8.02 (2 H, d, *J* = 8.2 Hz), 7.87 (2 H, d, *J* = 8.1 Hz), 4.46 (1 H, dd, *J* = 8.7, 1.7 Hz), 4.38 (2 H, q, *J* = 7.1 Hz), 2.47–2.37 (1 H, m), 2.24 (1 H, dtd, *J* = 11.1, 6.0, 2.1 Hz), 2.15 (1 H, t, *J* = 5.5 Hz), 2.04–1.83 (2 H, m), 1.49 (3 H, s), 1.39 (3 H, t, *J* = 7.1 Hz), 1.31 (3 H, s), 1.19 (1 H, d, *J* = 10.9 Hz), 0.89 (3 H, s) ppm. – <sup>13</sup>C NMR (125 MHz, CDCl<sub>3</sub>): 166.8, 134.8, 132.8, 128.7, 86.8, 78.6, 61.2, 51.5, 39.6, 38.4, 35.6, 28.8, 27.2, 26.6, 24.2, 14.5 ppm. – <sup>11</sup>B NMR (160.4 Hz, CDCl<sub>3</sub>): 30.4 ppm. – IR: 2974, 1715, 1560, 1507, 1401, 1313, 1227, 1199, 1139, 1108, 1094, 1021 cm<sup>-1</sup>. – HRMS: calcd for C<sub>19</sub>H<sub>26</sub>BO<sub>4</sub>: 329.1919, found 329.1920 [M+H<sup>+</sup>].

## Computational Data

### 1. Software

All geometry optimizations, vertical excitations, vibrational frequency calculations, and IRCs were conducted using the Gaussian 16 program.<sup>[64]</sup> Calculations were performed using the Stampede2 supercomputer at the Texas Advanced Computing Center (TACC) hosted by the University of Texas in Austin, Texas.<sup>[65]</sup> General day-to-day visualization and monitoring of calculations was performed with Chemcraft.<sup>[66]</sup> Final images of minima and transition state geometries were rendered using CYLview.<sup>[67]</sup> Spin density images were generated from the optimized .chk files (converted to .fchk) with the Gaussian Cubegen utility (with spin=SCF and npts = 300). VMD was used to render the final images from the .cube files with an isovalue of 0.02 au for radical species.<sup>[68]</sup>

### 2. Details of calculations

Geometries of ground state minima and transition states were optimized without constraints using the M06-2X functional<sup>[69]</sup> with the def2-SVP<sup>[70-71]</sup> basis set in the SMD solvation model<sup>[72]</sup> using the “acetonitrile” keyword. This combination of functional and basis set was chosen for its accuracy in reproducing experimental values for electronic and excited state transitions in a benchmarking study of different methodologies. Two experimental values were used as benchmarking criteria for selection of an appropriate computational method: the  $E_{0-0}$  for the first singlet excited state of **PTH1** and the redox potential of ground state **PTH1** (**PTH1** to **PTH1<sup>•+</sup>**). Empirical dispersion was then included in the form of the D3 model developed by Grimme<sup>[73]</sup> to account for the long-range noncovalent interactions present in several intermediate species. Convergence criteria for the calculations were set to “tight” and an ultrafine grid was selected. Frequency calculations were performed on the resultant geometries to verify the nature of the isolated stationary points. Geometries with zero imaginary frequencies were

deemed minima whereas those with exactly one imaginary frequency along the chemical path of interest were deemed transition states. IRC calculations were performed to further corroborate that the located transition states connected reactants to products. The ground state encounter complex of **PTH1** and carbonate dianion was optimized separately using the B3LYP functional<sup>[74-77]</sup> and 6-31+G(d) basis set.<sup>[78]</sup> A subsequent single-point calculation was performed on the optimized geometry at the M06-2X D3 / def2-SVP / SMD (MeCN) level to verify that the geometry corresponded to a minimum on the M06-2X surface. TD-DFT calculations (vertical excitation of 10 excited states, optimization, and frequency analysis) were all conducted at the M06-2X / def2-SVP / SMD (MeCN) level of theory. The D3 empirical dispersion correction was omitted in TD-DFT calculations as corrections for noncovalent forces were parameterized for ground state species and may introduce inaccuracies in excited state geometries.<sup>[79-81]</sup>

### 3. Marcus theory-based estimation of activation barrier for stepwise and concerted dissociative PCET of photocatalyst complex 123(S1) and phosphate ester 124

Activation barriers for stepwise and concerted dissociative proton-coupled electron transfer (PCET) were calculated using Marcus-Hush theory<sup>[82]</sup> in conjunction with the Savéant model.<sup>[83,84]</sup>

$$\Delta G_{PCET}^{\ddagger} = \Delta G_0^{\ddagger} \left( 1 + \frac{\Delta G_r}{4\Delta G_0^{\ddagger}} \right)^2 \quad (1)$$

The intrinsic barrier,  $\Delta G_0^{\ddagger}$ , is estimated by calculating  $\lambda$ , the sum of internal and solvent reorganization energies:

$$\Delta G_0^{\ddagger} = \frac{\lambda}{4} = \frac{\lambda_i + \lambda_0}{4} = \frac{\lambda_i + \lambda_0}{4} \quad (2)$$

## Internal Reorganization Energy

The internal reorganization energy,  $\lambda_i$ , is calculated using the Savéant model<sup>[83,84]</sup> as:

$$\lambda_i = \frac{\lambda_i^R + \lambda_i^P}{2} \quad (3)$$

Where  $\lambda_i^R$  and  $\lambda_i^P$  are the difference between distorted (those of products for reactants and those of reactants for products) and equilibrium geometries for reactants and products, respectively.

## Solvent Reorganization Energy

The solvent reorganization energy,  $\lambda_0$ , is separated into two components, one related to electron transfer (4) and the other related to proton transfer (5):<sup>[83,84]</sup>

$$\lambda_s^{ET} = \left(332 \frac{kcal}{mol}\right) \left(\frac{1}{2a_1} + \frac{1}{2a_2} - \frac{1}{R_{12}}\right) \left(\frac{1}{\varepsilon_{op}} - \frac{1}{\varepsilon_s}\right) \quad (4)$$

$$\lambda_s^{PT} = \frac{1}{4\pi\varepsilon_0} \left(\frac{\varepsilon_s - 1}{2\varepsilon_s + 1} - \frac{\varepsilon_{op} - 1}{\varepsilon_{op} + 1}\right) \frac{(\mu_R - \mu_P)^2}{a^3} \quad (5)$$

Where  $a_1$  and  $a_2$  are the radii of the donor and acceptor species and  $R_{12}$  is the inter-center distance.  $\varepsilon_{op}$  is the square of the refractive index and  $\varepsilon_s$  the dielectric constant, both in reference to acetonitrile.  $a$  is the total radius of the encounter complex (11.2 Å).  $\mu_R$  and  $\mu_P$  are reactant and product dielectric constants, respectively.

## Contribution of BDFE

In the case of the concerted dissociative process, the intrinsic barrier also contains a contribution from the bond dissociation free energy of the acceptor species:

$$\Delta G_0^\ddagger = \frac{\lambda_i + \lambda_0 + BDFE}{4} \quad (6)$$

The BDFE is calculated for:

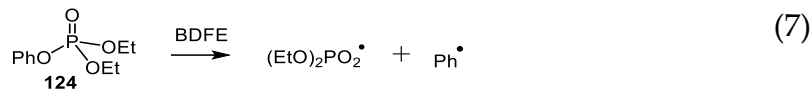

**Table S3. Stepwise and Concerted dissociative PCET values <sup>a</sup>**

|                  | $a_1, \text{\AA}$ | $a_2, \text{\AA}$ | $\epsilon_{\text{op}}$ | $\epsilon$ | $\lambda_i$ | $\lambda_{\text{ET}}$ | $\lambda_{\text{PT}}$ | BDFE  | $\Delta G_{\text{r}}$ | $\Delta G_{\text{PCET}}^\ddagger$ |
|------------------|-------------------|-------------------|------------------------|------------|-------------|-----------------------|-----------------------|-------|-----------------------|-----------------------------------|
| <b>Stepwise</b>  | 5.64              | 5.74              | 1.81                   | 35.69      | 33.99       | 15.33                 | 1.25                  | –     | –29.93                | 2.11                              |
| <b>Concerted</b> | 5.64              | 5.74              | 1.81                   | 35.69      | 33.99       | 15.33                 | 1.25                  | 99.76 | –41.2                 | 19.81                             |

<sup>a</sup>  $a_1$  is the radius of the donor species,  $a_2$  the radius of the acceptor species;  $\epsilon_{\text{op}}$  is the square of the refractive index of acetonitrile,  $\epsilon_s$  the dielectric constant of acetonitrile;  $\lambda_i$  is the internal reorganization energy,  $\lambda_0$  is the solvent reorganization energy; BDFE the bond dissociation free energy of **124** along the C–O bond,  $\Delta G_{\text{r}}$  the Gibbs free energy of the stepwise and concerted processes, and  $\Delta G_{\text{ET}}^\ddagger$  is the calculated activation barrier of the electron transfer processes.  $\lambda$  and free energy entries are expressed in kcal/mol.

The calculations suggest that the stepwise process has a substantially lower activation barrier than the concerted dissociative process, indicating that the reaction likely proceeds by the stepwise mechanism.

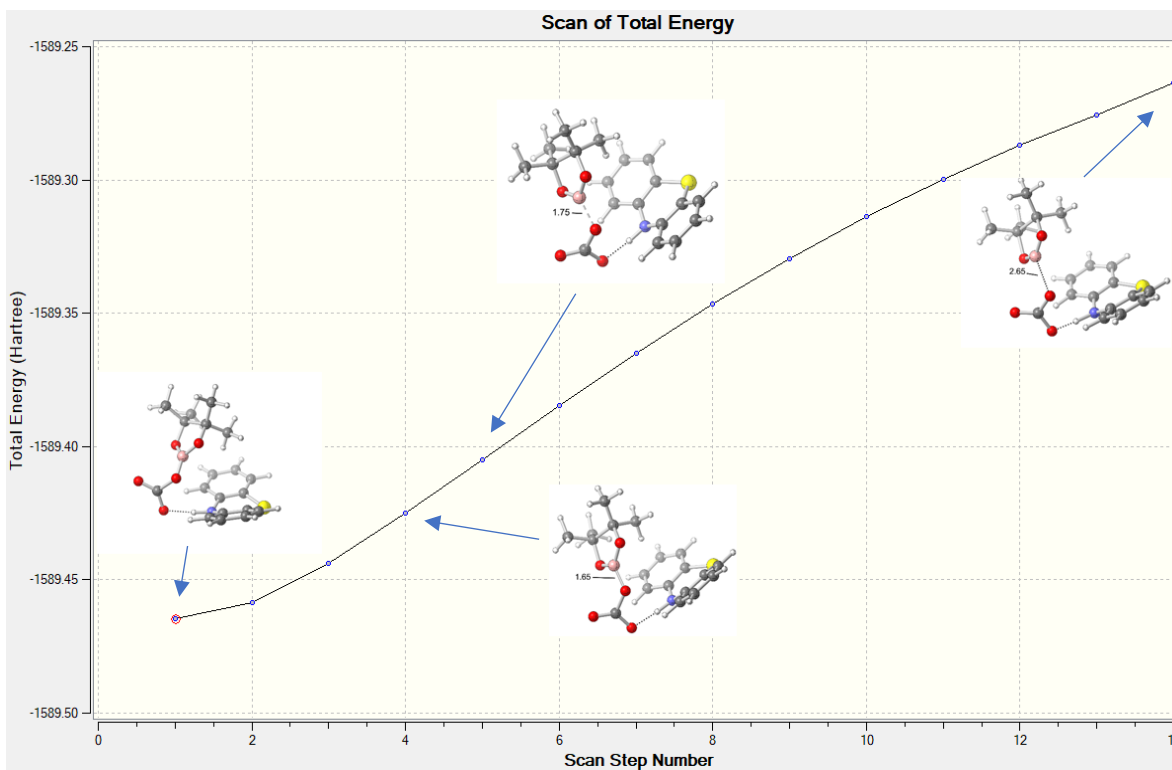

**Figure S6. Relaxed PES Scan of 125 + Bpin Radical  $\rightarrow$  126.** A relaxed scan of the B–O bond length was conducted at the uM06-2X D3 / def2-SVP / SMD (MeCN) level of theory to probe for the presence of a barrier to radical recombination. Scanning began from the optimized bond distance from structure **126** (1.3504 Å). An interval of 0.1 Å was selected for the scan, and 14 geometries were obtained. The final B–O bond distance was 2.6504 Å. Cleavage of the bond occurred between points 4 and 5, corresponding to distances of 1.6504 Å and 1.7504 Å, respectively.



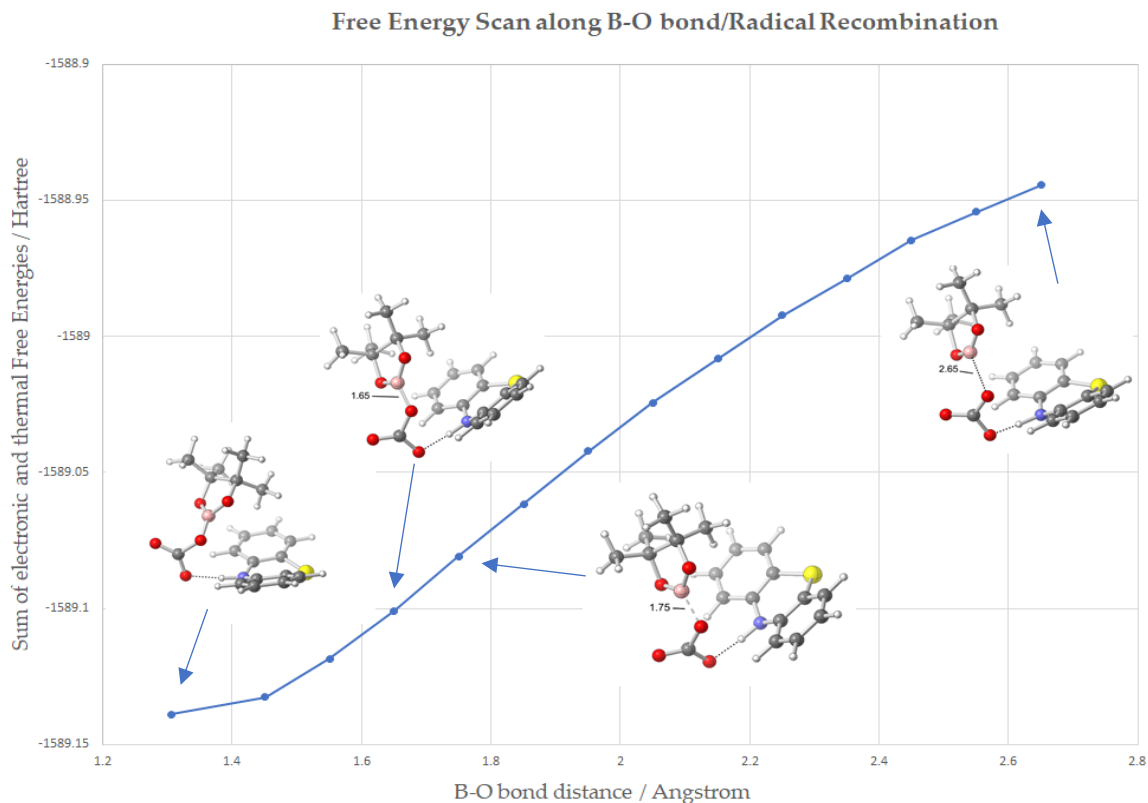

### FES Scan of 125 + Bpin Radical → 126

**Figure S7. FES Scan of 125 + Bpin Radical → 126.** Single point calculations were conducted at each of the optimized sub-geometries of the relaxed PES scan of the B–O bond length in order to further investigate the energetics of the radical recombination step. The FES scan indicates that the radical recombination proceeds without a barrier.

### Optimized Geometries (M06-2X D3 / Def2-SVP / SMD (MeCN))

#### 123 – GS PTH Carbonate Dianion

pth-carb-m062x-sp3.log

m062x/def2svp

$E(\text{RM062X}) = -1178.64707046$

Zero-point correction= 0.194806 (Hartree/Particle)

Thermal correction to Energy= 0.209419

Thermal correction to Enthalpy= 0.210363

Thermal correction to Gibbs Free Energy= 0.151993

Sum of electronic and ZPE= -1178.452264

Sum of electronic and thermal Energies= -1178.437651

Sum of electronic and thermal Enthalpies= -1178.436707

Sum of electronic and thermal Free Energies= -1178.495077

|       | E, kcal/mol | CV, cal/(mol·K) | S, cal/(mol·K) |
|-------|-------------|-----------------|----------------|
| Total | 131.413     | 56.071          | 122.85         |

Optimized Cartesian Coordinates:

Charge = -2 Multiplicity = 1

C -7.74513 0.28405 -0.10309

C -6.59283 0.65286 -0.80004

C -5.97697 1.89746 -0.56284

C -6.54606 2.75427 0.40316

C -7.67626 2.36222 1.12639

C -8.28995 1.13072 0.86911

C -4.1646 4.0846 0.20706

C -3.85017 3.08317 -0.73653

C -2.5057 2.93321 -1.13052

H -2.25078 2.15644 -1.84845

C -1.51451 3.76639 -0.60741

C -1.83222 4.7431 0.34311

C -3.16151 4.88816 0.75653

H -8.20977 -0.67653 -0.31321

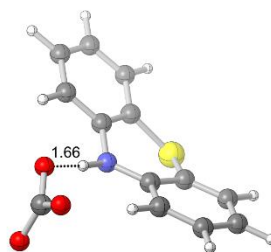

H -6.15173 -0.00859 -1.54122  
H -8.08987 3.03053 1.87832  
H -9.17945 0.84158 1.42255  
H -0.48588 3.63917 -0.93669  
H -1.06065 5.38456 0.76059  
H -3.42404 5.64316 1.49417  
S -5.88088 4.40401 0.60661  
N -4.83361 2.25436 -1.27854  
H -4.48712 1.5189 -1.95373  
C -3.01155 0.48974 -3.78752  
O -3.23808 1.14457 -4.88084  
O -1.82906 0.04902 -3.49902  
O -4.00467 0.27224 -2.94471

### **123 – No D3 – S1 PTH Carbonate Dianion**

pth-carb-m062x-es1-freq.log

m062x/def2svp

E(RM062X) = -1178.62515762

Zero-point correction= 0.189937 (Hartree/Particle)

Thermal correction to Energy= 0.205988

Thermal correction to Enthalpy= 0.206932

Thermal correction to Gibbs Free Energy= 0.143838

Sum of electronic and ZPE= -1178.346557

Sum of electronic and thermal Energies= -1178.330505

Sum of electronic and thermal Enthalpies= -1178.329561

Sum of electronic and thermal Free Energies= -1178.392656

|       | E, kcal/mol | CV, cal/(mol·K) | S, cal/(mol·K) |
|-------|-------------|-----------------|----------------|
| Total | 129.259     | 59.531          | 132.793        |

Optimized Cartesian Coordinates:

Charge = -2 Multiplicity = 1

C -7.85577 0.29893 -0.21085

C -6.55663 0.45731 -0.66657

C -5.79933 1.61719 -0.36677

C -6.45625 2.67731 0.35659

C -7.75741 2.48818 0.82023

C -8.47078 1.31123 0.57102

C -4.01216 3.92193 0.21326

C -3.60283 2.73574 -0.50301

C -2.25131 2.64498 -0.91241

H -1.94832 1.76693 -1.48855

C -1.32427 3.62502 -0.58957

C -1.7163 4.76013 0.17472

C -3.05762 4.8843 0.54527

H -8.4023 -0.6135 -0.45932

H -6.08371 -0.32137 -1.27228

H -8.23374 3.30552 1.37207

H -9.48064 1.1841 0.96235

H -0.29027 3.51406 -0.92284

H -0.99065 5.52017 0.46655

H -3.38912 5.77337 1.09262

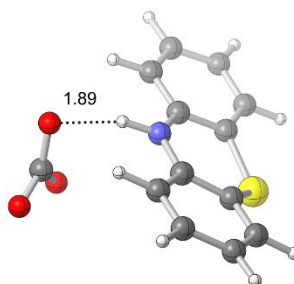

S -5.73782 4.29853 0.3843  
 N -4.48065 1.70071 -0.73506  
 H -4.1376 0.95964 -1.34709  
 C -3.46333 1.02938 -3.62979  
 O -4.58282 1.64461 -3.75448  
 O -2.52381 1.47765 -4.32266  
 O -3.3876 0.06132 -2.83449

**124 - PhPO<sub>4</sub>Et<sub>2</sub>**

phpo4-ethyl-m062x-svp-d3.log  
 m062x/def2svp

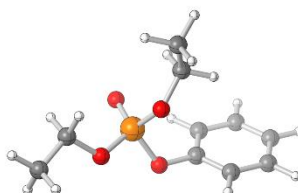

E(RM062X) = -1031.51618321

Zero-point correction= 0.244947 (Hartree/Particle)

Thermal correction to Energy= 0.261100

Thermal correction to Enthalpy= 0.262044

Thermal correction to Gibbs Free Energy= 0.197139

Sum of electronic and ZPE= -1031.271236

Sum of electronic and thermal Energies= -1031.255084

Sum of electronic and thermal Enthalpies= -1031.254139

Sum of electronic and thermal Free Energies= -1031.319045

|       | E, kcal/mol | CV, cal/(mol·K) | S, cal/(mol·K) |
|-------|-------------|-----------------|----------------|
| Total | 163.842     | 57.719          | 136.605        |

C,0,-1.2184557593,2.0235133426,0.4602261088

C,0,0.1718398217,2.1127263034,0.4029693304  
C,0,0.7535460914,3.2181804067,-0.2136752009  
C,0,-0.0236593986,4.2300814854,-0.7765203205  
C,0,-1.4136013244,4.1248815589,-0.7167011372  
C,0,-2.0130985387,3.0257083073,-0.1003328781  
H,0,-1.6824831589,1.161914395,0.9432258202  
H,0,0.8140342239,1.3395290203,0.82689589  
H,0,0.4662393239,5.0801111603,-1.2532295998  
H,0,-2.0299023049,4.9119866588,-1.1544554318  
H,0,-3.1005228116,2.9498075799,-0.0555338146  
O,0,2.1360913619,3.2950178652,-0.2502222405  
P,0,2.8689013883,3.2477615834,-1.6894607677  
O,0,2.6878498568,4.4398434838,-2.5430859499  
O,0,4.3335829473,2.930141306,-1.1758966251  
O,0,2.3772837899,1.8800744092,-2.3452331652  
C,0,5.4132184506,2.8975975958,-2.1314816472  
H,0,5.231631276,2.072736861,-2.8378765951  
H,0,5.4159883445,3.84337751,-2.6932429933  
C,0,1.4090111696,1.8342683751,-3.4120578481  
H,0,0.4461767057,1.5365842227,-2.9704661509  
H,0,1.301663547,2.8406038624,-3.8409730658  
C,0,6.7020973913,2.6981894529,-1.3762314509  
H,0,6.6794362186,1.7531240807,-0.8161360035  
H,0,7.5421395299,2.6664583281,-2.0834307471  
H,0,6.867741938,3.524820295,-0.6714776344  
C,0,1.8706376635,0.8403288297,-4.4489934639  
H,0,1.1213024969,0.7664036613,-5.2494191669

H,0,2.8253083009,1.1589428917,-4.8913073501

H,0,2.001915309,-0.1546274028,-4.0010807609

### 124<sup>-</sup> – PhPO<sub>4</sub>Et<sub>2</sub> Radical Anion

phpo4-radan-ethyl-m062x-svp-d3.log

um062x/def2svp

E(UM062X) = -1031.55118740

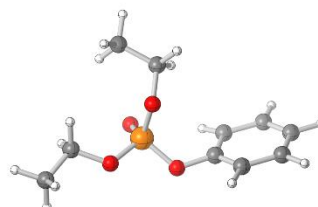

Zero-point correction= 0.238592 (Hartree/Particle)

Thermal correction to Energy= 0.255234

Thermal correction to Enthalpy= 0.256179

Thermal correction to Gibbs Free Energy= 0.192034

Sum of electronic and ZPE= -1031.312595

Sum of electronic and thermal Energies= -1031.295953

Sum of electronic and thermal Enthalpies= -1031.295009

Sum of electronic and thermal Free Energies= -1031.359153

|       | E, kcal/mol | CV, cal/(mol·K) | S, cal/(mol·K) |
|-------|-------------|-----------------|----------------|
| Total | 160.162     | 61.169          | 135.003        |

C,0,-1.3036360606,2.4131420716,0.9276819223

C,0,0.1394539474,2.4578936492,0.7523094475

C,0,0.6621334308,3.2794106917,-0.2210468714

C,0,-0.1106815312,4.0697080394,-1.0964419262

C,0,-1.5536154455,4.0213794139,-0.9049350352

C,0,-2.0987833815,3.2098795702,0.0772737747

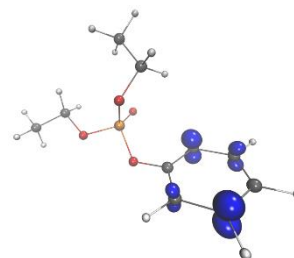

H,0,-1.7514443057,1.7883505207,1.7015383089  
H,0,0.8184588383,1.8515678828,1.3543596584  
H,0,0.3756898542,4.7842817474,-1.7597877527  
H,0,-2.2047986906,4.6248513766,-1.5420118277  
H,0,-3.1876746606,3.1894405675,0.1981903036  
O,0,2.0639865489,3.3208471449,-0.3306335884  
P,0,2.771330719,3.1023369358,-1.7465565117  
O,0,2.7537717585,4.2152719362,-2.7229582544  
O,0,4.2162974009,2.6998260719,-1.1992775503  
O,0,2.1693921449,1.7297376431,-2.309664743  
C,0,5.278647353,2.529801544,-2.1490159326  
H,0,5.0342951804,1.682905534,-2.8107948038  
H,0,5.3555953936,3.437723993,-2.7664192562  
C,0,1.451272489,1.6838596161,-3.5536482481  
H,0,0.7685349162,0.8285283639,-3.4660087367  
H,0,0.8471113645,2.5970070571,-3.6569615101  
C,0,6.5563596226,2.2712106193,-1.3900108609  
H,0,7.3868581059,2.1338031278,-2.0960275416  
H,0,6.7916590095,3.1197745019,-0.7324002481  
H,0,6.4643873658,1.3640503569,-0.7765707844  
C,0,2.398495285,1.5172985771,-4.7194518577  
H,0,1.829237644,1.4390063243,-5.6567963739  
H,0,3.0682924396,2.3866436165,-4.7906234336  
H,0,3.0029863137,0.6061283752,-4.6028377668



## 125 – PTH Carbonate Radical Anion

pth-carb-radan-d3.log

um062x/def2svp

E(UM062X) = -1178.55201795

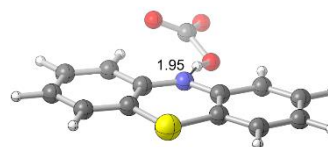

Zero-point correction= 0.196358 (Hartree/Particle)

Thermal correction to Energy= 0.211209

Thermal correction to Enthalpy= 0.212153

Thermal correction to Gibbs Free Energy= 0.151775

Sum of electronic and ZPE= -1178.355660

Sum of electronic and thermal Energies= -1178.340809

Sum of electronic and thermal Enthalpies= -1178.339865

Sum of electronic and thermal Free Energies= -1178.400243

|       | E, kcal/mol | CV, cal/(mol·K) | S, cal/(mol·K) |
|-------|-------------|-----------------|----------------|
| Total | 132.536     | 56.028          | 127.077        |

C,0,-7.5192345013,0.0270289214,-0.1731334887

C,0,-6.1445330345,0.1366644466,-0.1891101096

C,0,-5.4992258642,1.4028253103,-0.101880221

C,0,-6.3302825042,2.5549134195,-0.0002954119

C,0,-7.7267888803,2.43160739,0.0156681721

C,0,-8.319037501,1.180148907,-0.0689928846

C,0,-3.9438391923,3.8607737159,0.0773690316

C,0,-3.4129713951,2.5429849054,-0.0215132052

C,0,-1.996435727,2.3978860025,-0.0179262022

H,0,-1.6096257988,1.3718820184,-0.0643420548

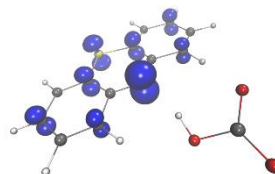

C,0,-1.1699585373,3.5002964639,0.0647189723  
C,0,-1.7155214624,4.7948225339,0.1501571881  
C,0,-3.0915832901,4.9706007137,0.1590641275  
H,0,-7.9873794933,-0.9561067452,-0.2406762307  
H,0,-5.4983704993,-0.739750935,-0.2718917295  
H,0,-8.3456848256,3.3283182941,0.0948580525  
H,0,-9.4064685931,1.0958489712,-0.0549387594  
H,0,-0.0866583938,3.3681500379,0.0667412873  
H,0,-1.0609510675,5.6652538503,0.2134502962  
H,0,-3.5182587043,5.9736057354,0.2302102573  
S,0,-5.6633560595,4.1657160402,0.0983724557  
N,0,-4.1445206187,1.40601502,-0.1192695611  
H,0,-3.334488455,-0.2898516352,-0.645617508  
C,0,-1.9247854785,-1.5955169834,-0.4953331666  
O,0,-1.6077519827,-2.7577223698,-0.7648270366  
O,0,-1.2786745746,-0.7214332806,0.1233162961  
O,0,-3.1780718886,-1.2039564164,-0.9534045958

### (EtO)<sub>2</sub>PO<sub>2</sub><sup>-</sup> Anion

po4-ethyl-m062x-svp-d3.log

m062x/def2svp

E(RM062X) = -800.258747681

Zero-point correction= 0.151669 (Hartree/Particle)

Thermal correction to Energy= 0.162463

Thermal correction to Enthalpy= 0.163408

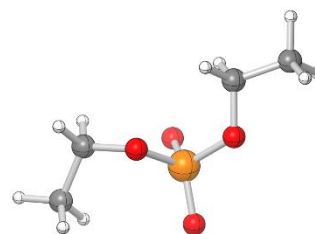

Thermal correction to Gibbs Free Energy= 0.113729

Sum of electronic and ZPE= -800.107078

Sum of electronic and thermal Energies= -800.096284

Sum of electronic and thermal Enthalpies= -800.095340

Sum of electronic and thermal Free Energies= -800.145018

|       | E, kcal/mol | CV, cal/(mol·K) | S, cal/(mol·K) |
|-------|-------------|-----------------|----------------|
| Total | 101.947     | 37.409          | 104.556        |

P,0,-0.2716810669,1.471527536,-0.1811703296

O,0,0.3084922984,2.5350549608,-1.2920078853

O,0,0.4896264612,2.1247985321,1.1428637757

C,0,-0.078484948,3.8906797718,-1.1924165275

H,0,0.4886163509,4.3798790338,-0.3806214921

H,0,-1.1475489215,3.9516966663,-0.9278479778

C,0,-0.0876422681,1.9114709049,2.4134386771

H,0,0.4297203815,2.5844626893,3.1151051901

H,0,-1.1525403229,2.1983570388,2.3911663565

O,0,-1.7506253752,1.6636163055,0.0010762598

O,0,0.3204553131,0.1384377439,-0.5083547679

C,0,0.1841477044,4.5814206814,-2.5128414037

H,0,-0.4010818062,4.1095895498,-3.3156826192

H,0,-0.0933952187,5.6438090937,-2.4556685039

H,0,1.2495039096,4.5143071414,-2.7782111859

C,0,0.0523208107,0.4706356164,2.8737618552

H,0,-0.3296687322,0.3506017884,3.8984441869

H,0,-0.5094664975,-0.2029831752,2.2102698825

H,0,1.1088863774,0.1644139908,2.854232376

## Ph Radical

bs1-m062x-svp-d3.log

m062x/def2svp

E(UM062X) = -231.292276445

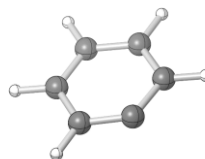

Zero-point correction= 0.088207 (Hartree/Particle)

Thermal correction to Energy= 0.092539

Thermal correction to Enthalpy= 0.093484

Thermal correction to Gibbs Free Energy= 0.060180

Sum of electronic and ZPE= -231.204069

Sum of electronic and thermal Energies= -231.199737

Sum of electronic and thermal Enthalpies= -231.198793

Sum of electronic and thermal Free Energies= -231.232096

|       | E, kcal/mol | CV, cal/(mol·K) | S, cal/(mol·K) |
|-------|-------------|-----------------|----------------|
| Total | 58.069      | 16.59           | 70.093         |

C,0,-1.1690430004,1.5763795043,0.0000579303

C,0,0.2074202481,1.645185124,0.0004539033

C,0,0.9552964943,2.8028365046,-0.0000477203

C,0,0.2433438048,4.0110269428,-0.0010409058

C,0,-1.1539030901,4.0032821732,-0.0014839703

C,0,-1.859227298,2.7971118981,-0.0009381379

H,0,-1.7083585718,0.6264044143,0.0004976274

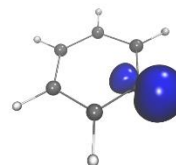

H,0,2.0477122107,2.7946235271,0.0003020802  
H,0,0.7863512772,4.958572321,-0.0014764712  
H,0,-1.6997320762,4.9482813828,-0.0022641763  
H,0,-2.9513846056,2.8009274667,-0.0012861594

## B<sub>2</sub>Bin<sub>2</sub>

bpin-dimer-m062x-svp-d3.log

m062x/def2svp

E(RM062X) = -821.592421021

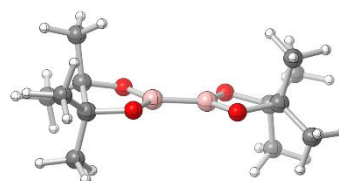

Zero-point correction= 0.364062 (Hartree/Particle)

Thermal correction to Energy= 0.383506

Thermal correction to Enthalpy= 0.384450

Thermal correction to Gibbs Free Energy= 0.317458

Sum of electronic and ZPE= -821.228359

Sum of electronic and thermal Energies= -821.208915

Sum of electronic and thermal Enthalpies= -821.207971

Sum of electronic and thermal Free Energies= -821.274963

|       | E, kcal/mol | CV, cal/(mol·K) | S, cal/(mol·K) |
|-------|-------------|-----------------|----------------|
| Total | 240.654     | 77.579          | 140.997        |

C,0,-0.7710452149,0.9069844962,0.137298704

C,0,0.4506126119,1.6626869088,0.7589906498

B,0,-1.1357419687,3.1533625426,0.0937041206

C,0,-3.18058289,6.2409746464,-1.2169652824

C,0,-2.6082065493,6.7953531583,0.1301582641  
B,0,-1.9175105788,4.6502315829,-0.1896455351  
O,0,-0.0820540303,2.9921266798,0.9541579251  
O,0,-1.4918956215,1.9778123601,-0.5128859009  
O,0,-2.9356463069,4.8222517287,-1.0898646261  
O,0,-1.5977567298,5.8148045772,0.4572227952  
C,0,-1.9625650155,8.165490592,0.0283399532  
H,0,-2.6958253726,8.9083179134,-0.3189802111  
H,0,-1.6012788854,8.4765848144,1.0191121549  
H,0,-1.1104850192,8.1586545878,-0.6630301935  
C,0,-2.3960743,6.719674473,-2.4345478398  
H,0,-2.7141960415,6.1384960049,-3.3117274549  
H,0,-2.5806561868,7.7841064445,-2.6356482858  
H,0,-1.3156688444,6.56904164,-2.2936312511  
C,0,-4.6665752906,6.476595534,-1.4192880856  
H,0,-4.9756442174,6.0624751269,-2.3898306736  
H,0,-5.2612890702,5.9942400586,-0.6333357272  
H,0,-4.8860211233,7.55452912,-1.4200001716  
C,0,-3.6313438837,6.7727762472,1.2614000111  
H,0,-3.1143926739,6.9734759441,2.210570911  
H,0,-4.4045155926,7.540127287,1.1166669479  
H,0,-4.1191000715,5.7896337925,1.3347457535  
C,0,0.9249949751,1.1120948812,2.0918059895  
H,0,1.2437384566,0.0650741994,1.981031227  
H,0,1.7856371678,1.6974940205,2.4461542244  
H,0,0.1358841782,1.1638114367,2.8525175219  
C,0,1.6219102188,1.7919556165,-0.2097848457

H,0,2.3508298609,2.5004654302,0.208684353  
H,0,2.122727843,0.8258661197,-0.3627366612  
H,0,1.288394714,2.1752146828,-1.1853583118  
C,0,-0.407098507,-0.1489029705,-0.890916404  
H,0,0.2259464005,-0.9242300057,-0.434582868  
H,0,-1.3228269953,-0.6291933995,-1.2646989209  
H,0,0.1267507254,0.2871674661,-1.7446902234  
C,0,-1.7038270074,0.3211677691,1.1927150784  
H,0,-2.6311750071,-0.0071929243,0.7021622372  
H,0,-1.2482295517,-0.5448709075,1.6926746582  
H,0,-1.9626459949,1.0722707073,1.9534561237

## TS2

bpin-tsr-d3-b.log

um062x/def2svp

E(UM062X) = -1052.89818321

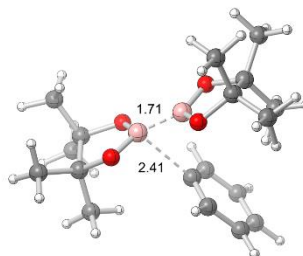

Zero-point correction= 0.452459 (Hartree/Particle)

Thermal correction to Energy= 0.477327

Thermal correction to Enthalpy= 0.478271

Thermal correction to Gibbs Free Energy= 0.398142

Sum of electronic and ZPE= -1052.445724

Sum of electronic and thermal Energies= -1052.420856

Sum of electronic and thermal Enthalpies= -1052.419912

Sum of electronic and thermal Free Energies= -1052.500041

|       | E, kcal/mol | CV, cal/(mol·K) | S, cal/(mol·K) |
|-------|-------------|-----------------|----------------|
| Total | 299.527     | 98.321          | 168.646        |

C,0,-0.8361279076,0.7393120807,0.2251669163  
 C,0,0.3383786059,1.4231603744,1.0066447393  
 B,0,-1.0285275454,3.0091239034,0.1020308298  
 C,0,-2.9836607304,6.1330569988,-1.2608241896  
 C,0,-2.386790026,6.6983940929,0.0735237142  
 B,0,-1.7661145161,4.5240217579,-0.207994585  
 O,0,-0.1150153709,2.790021034,1.106818593  
 O,0,-1.3900802775,1.8385063547,-0.5275610336  
 O,0,-2.7882978905,4.7105485448,-1.1038860516  
 O,0,-1.4193767979,5.6879161669,0.4311460969  
 C,0,-1.6800959661,8.0351065804,-0.0675737469  
 H,0,-2.3777598954,8.8009655313,-0.4375067912  
 H,0,-1.3043109788,8.3578500442,0.9140951501  
 H,0,-0.8290295703,7.968210368,-0.7575762982  
 C,0,-2.1945151638,6.5648144954,-2.4940509672  
 H,0,-2.5373610568,5.9760401652,-3.3573962544  
 H,0,-2.3537842876,7.6299326412,-2.7135872841  
 H,0,-1.1162803181,6.3890147072,-2.3621610544  
 C,0,-4.4625250752,6.4132106782,-1.4610132002  
 H,0,-4.7895262057,5.9878653732,-2.4208196489  
 H,0,-5.068501892,5.9677085211,-0.6620140036  
 H,0,-4.6473254364,7.4973379416,-1.4849031041  
 C,0,-3.41030412,6.7549546158,1.203113843  
 H,0,-2.8850152337,6.9635957691,2.1460220397

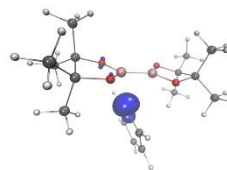



H,0,-4.1510481795,7.5488632843,1.0338182877  
H,0,-3.9380837738,5.7955746895,1.3071012442  
C,0,0.5707898981,0.874617268,2.4038650781  
H,0,0.8175541052,-0.1964222248,2.3589352069  
H,0,1.4156722223,1.4025301158,2.8692673026  
H,0,-0.3125799686,1.0086868664,3.0408303553  
C,0,1.6473764066,1.4312521152,0.2224765756  
H,0,2.3550313085,2.10891641,0.7220533633  
H,0,2.0931967418,0.4273382187,0.1849350227  
H,0,1.4963772018,1.7883386613,-0.8062056001  
C,0,-0.4038786084,-0.3555700328,-0.73432584  
H,0,0.1101038912,-1.1619027545,-0.1904736334  
H,0,-1.2892053279,-0.7832484394,-1.2266376594  
H,0,0.2680298782,0.0328755595,-1.5103486968  
C,0,-1.9413977164,0.2305652435,1.1460539424  
H,0,-2.8102223797,-0.0498773768,0.5336928093  
H,0,-1.6160823108,-0.6519017771,1.7144021304  
H,0,-2.2564066128,1.0106798595,1.8546255381  
C,0,0.2556016681,4.0401082766,-1.6634012508  
C,0,1.1970806953,5.0022636761,-1.3666678097  
C,0,1.8491508785,5.5934204042,-2.457308945  
C,0,1.5331683082,5.2014898637,-3.7618362962  
C,0,0.5726204501,4.2141621814,-3.99830198  
C,0,-0.0935590415,3.6078056665,-2.924404391  
H,0,1.4110749983,5.3047986686,-0.3393633609  
H,0,2.6022824828,6.3652495407,-2.2845344751  
H,0,2.0428480414,5.6714481187,-4.6046287206

H,0,0.3350464194,3.9151678432,-5.0215236384

H,0,-0.8574335489,2.8423896187,-3.0777227622

### PhBPin

bs3-m062x-svp-d3.log

um062x/def2svp

E(UM062X) = -642.200759529

Zero-point correction= 0.273611 (Hartree/Particle)

Thermal correction to Energy= 0.287786

Thermal correction to Enthalpy= 0.288730

Thermal correction to Gibbs Free Energy= 0.233006

Sum of electronic and ZPE= -641.927148

Sum of electronic and thermal Energies= -641.912974

Sum of electronic and thermal Enthalpies= -641.912030

Sum of electronic and thermal Free Energies= -641.967753

|       | E, kcal/mol | CV, cal/(mol·K) | S, cal/(mol·K) |
|-------|-------------|-----------------|----------------|
| Total | 180.588     | 56.753          | 117.28         |

C,0,-0.5187898598,0.428764,-1.2314383209

C,0,0.8628771692,0.6181590576,-1.2538038781

C,0,1.5423439746,0.917472131,-0.0707886827

C,0,0.839200344,1.0276511114,1.1310115929

C,0,-0.5426182227,0.8390294303,1.1459316765

C,0,-1.2416120742,0.5364734966,-0.033045582

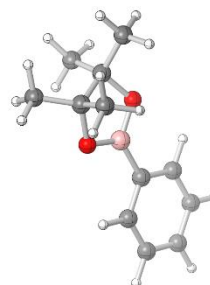

H,0,-1.0492794838,0.1923552548,-2.1571922226  
H,0,1.4131241849,0.5320282308,-2.1927473679  
H,0,2.6240190975,1.0657857507,-0.0854814713  
H,0,1.3709147914,1.2620189211,2.0552447284  
H,0,-1.0923746809,0.9272452646,2.0862856995  
B,0,-2.7889038983,0.3231934828,-0.0102255437  
O,0,-3.5368885668,0.3583253566,1.1332139489  
O,0,-3.5339226204,0.0817331479,-1.1303776848  
C,0,-4.8598789368,-0.2922456711,-0.6906378252  
C,0,-4.9273458243,0.3548437857,0.7360507294  
C,0,-5.8833679218,0.2414365003,-1.6757175894  
H,0,-6.9020530565,0.0569114016,-1.3040965515  
H,0,-5.75646819,1.3183475553,-1.8435156389  
H,0,-5.7700898961,-0.2750651635,-2.6396826589  
C,0,-4.9017079699,-1.8161484791,-0.649621378  
H,0,-5.9029531325,-2.1807837826,-0.3816323279  
H,0,-4.6440365196,-2.2040089657,-1.64535569  
H,0,-4.1757394381,-2.2136910387,0.0749721956  
C,0,-5.7358882911,-0.4330589128,1.7500659817  
H,0,-6.7772781498,-0.5345207992,1.4108773148  
H,0,-5.3154903326,-1.4339339993,1.9098407749  
H,0,-5.7380604498,0.0993663222,2.7120119371  
C,0,-5.384305283,1.8093361658,0.7021391981  
H,0,-4.8170510659,2.3858085995,-0.043487612  
H,0,-6.4547998983,1.8857368309,0.4667829087  
H,0,-5.2115164117,2.2577975032,1.6907404085

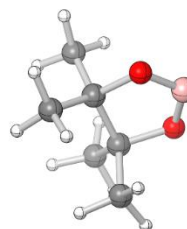

## Bpin Radical

bpin-r-d3.log

um062x/def2svp

E(UM062X) = -410.711637141

Zero-point correction= 0.180108 (Hartree/Particle)

Thermal correction to Energy= 0.189334

Thermal correction to Enthalpy= 0.190278

Thermal correction to Gibbs Free Energy= 0.146735

Sum of electronic and ZPE= -410.531529

Sum of electronic and thermal Energies= -410.522303

Sum of electronic and thermal Enthalpies= -410.521359

Sum of electronic and thermal Free Energies= -410.564902

|       | E, kcal/mol | CV, cal/(mol·K) | S, cal/(mol·K) |
|-------|-------------|-----------------|----------------|
| Total | 118.809     | 36.907          | 91.643         |

B,0,-2.8012464607,0.3228812205,-0.0093187202

O,0,-3.520119024,0.3638110967,1.1338043155

O,0,-3.5159705117,0.0831030395,-1.130393053

C,0,-4.8602115397,-0.2911252444,-0.6906883375

C,0,-4.9280865995,0.3540203711,0.736433462

C,0,-5.8708348029,0.2549088596,-1.6799463522

H,0,-6.8924252776,0.0742705003,-1.3140781535

H,0,-5.7371144962,1.3318432751,-1.8409736459

H,0,-5.7553165634,-0.2584387336,-2.6450744427

C,0,-4.9036163441,-1.8133490712,-0.6597663316

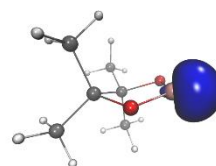

H,0,-5.9081262317,-2.1743008394,-0.398726892  
H,0,-4.6440120335,-2.1954037953,-1.6569850486  
H,0,-4.1829677095,-2.218171617,0.0655831858  
C,0,-5.7206465804,-0.4428886504,1.7537553643  
H,0,-6.7633183501,-0.5496343386,1.4197282604  
H,0,-5.293294465,-1.441651662,1.9069074063  
H,0,-5.7208187547,0.087153324,2.7167557533  
C,0,-5.3872058563,1.8060381128,0.712186883  
H,0,-4.826957243,2.3884437012,-0.0336098018  
H,0,-6.4594557804,1.8768988133,0.4827691738  
H,0,-5.2123030156,2.2497257378,1.7023031146

### 126 - PTH-Carbonate-Bpin Anion

pth-bpin-co3-an-d3.log

um062x/def2svp

E(UM062X) = -1589.46468018

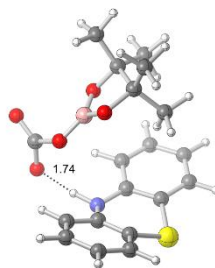

Zero-point correction= 0.380708 (Hartree/Particle)

Thermal correction to Energy= 0.405456

Thermal correction to Enthalpy= 0.406400

Thermal correction to Gibbs Free Energy= 0.325720

Sum of electronic and ZPE= -1589.083972

Sum of electronic and thermal Energies= -1589.059225

Sum of electronic and thermal Enthalpies= -1589.058280

Sum of electronic and thermal Free Energies= -1589.138960

|       | E, kcal/mol | CV, cal/(mol·K) | S, cal/(mol·K) |
|-------|-------------|-----------------|----------------|
| Total | 254.427     | 96.347          | 169.805        |

B,0,-2.5166430844,-2.9667308129,0.2763775762  
 O,0,-1.1426723585,-2.965464795,0.2717597974  
 O,0,-3.0527938258,-2.8545223133,-0.9872397976  
 C,0,-1.9736579059,-2.4904935624,-1.8660517508  
 C,0,-0.7241968249,-3.0540995867,-1.1031019418  
 C,0,-2.2089081717,-3.1011786476,-3.2351887498  
 H,0,-1.3443673442,-2.9187699705,-3.8905485244  
 H,0,-2.3814903645,-4.1829311255,-3.1679205562  
 H,0,-3.0932517356,-2.6385032062,-3.6970193504  
 C,0,-1.9605467012,-0.9673530959,-1.9484984263  
 H,0,-1.2072127291,-0.6034768525,-2.6616383727  
 H,0,-2.9521537014,-0.6207230901,-2.275466608  
 H,0,-1.7512331587,-0.5336607051,-0.9594692999  
 C,0,0.5460606251,-2.244857491,-1.2936227473  
 H,0,0.8270684942,-2.2158702639,-2.3568611537  
 H,0,0.421372829,-1.2162189189,-0.9309029704  
 H,0,1.3687500541,-2.7121173284,-0.7329431876  
 C,0,-0.4703262201,-4.527631641,-1.4052349171  
 H,0,-1.3936575618,-5.115795091,-1.2958990744  
 H,0,-0.0806698557,-4.6693748228,-2.4229984899  
 H,0,0.2705399465,-4.9127580939,-0.6901440726  
 O,0,-3.3093971277,-3.0181832711,1.3683434101  
 C,0,-2.8099955155,-3.3274733717,2.6724788147  
 O,0,-3.0751585489,-2.438266673,3.5047785465

O,0,-2.2505207109,-4.4040490158,2.7946510905  
C,0,-0.4484813096,0.6374892812,1.2060167365  
C,0,-1.5444662624,0.0058930774,1.7904417202  
C,0,-2.8505470004,0.4445755925,1.520187638  
C,0,-3.0276392394,1.516552968,0.6239006744  
C,0,-1.9283405371,2.1202488291,0.0142135005  
C,0,-0.6322775099,1.6923171017,0.310669735  
C,0,-5.6171935423,0.7030931499,0.604968328  
C,0,-5.1693475528,-0.2756403171,1.5112337182  
C,0,-6.0016966092,-1.3740379604,1.7777590442  
H,0,-5.6349478738,-2.1373468499,2.4664245037  
C,0,-7.2498121649,-1.4826937961,1.1703554997  
C,0,-7.6802749073,-0.5167622443,0.2585316464  
C,0,-6.8531852687,0.5701625943,-0.0283928247  
H,0,0.5583248785,0.2887183163,1.443645678  
H,0,-1.416443048,-0.8348937769,2.4749459288  
H,0,-2.0914869044,2.9420245488,-0.6867394355  
H,0,0.2234005488,2.1818030121,-0.1563859364  
H,0,-7.8849058444,-2.3397630427,1.4018967785  
H,0,-8.6524878573,-0.6049492738,-0.2280240162  
H,0,-7.1736839672,1.33578413,-0.7384744547  
S,0,-4.656740129,2.1814048346,0.3678120353  
N,0,-3.9295997663,-0.1825101071,2.12936527  
H,0,-3.6656576354,-1.0179136505,2.6916719877

### CO<sub>3</sub><sup>2-</sup> Dianion

co3-m062x-svp-d3.log

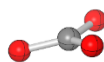

m062x/def2svp

E(RM062X) = -263.662862590

Zero-point correction= 0.014869 (Hartree/Particle)

Thermal correction to Energy= 0.018013

Thermal correction to Enthalpy= 0.018958

Thermal correction to Gibbs Free Energy= -0.010647

Sum of electronic and ZPE= -263.647993

Sum of electronic and thermal Energies= -263.644849

Sum of electronic and thermal Enthalpies= -263.643905

Sum of electronic and thermal Free Energies= -263.673509

|       | E, kcal/mol | CV, cal/(mol·K) | S, cal/(mol·K) |
|-------|-------------|-----------------|----------------|
| Total | 11.304      | 8.512           | 62.307         |

C,0,-0.4373532547,1.4219037928,-0.0000053644

O,0,0.2077196174,2.5401156892,0.0000017699

O,0,0.2077196208,0.3036918982,0.0000017699

O,0,-1.7282742235,1.4219037908,0.0000018247

### PinBOCO<sub>2</sub> - Anion

bs8-m062x-svp-d3.log

m062x/def2svp

E(RM062X) = -674.493993392



Zero-point correction= 0.198858 (Hartree/Particle)

Thermal correction to Energy= 0.211977

Thermal correction to Enthalpy= 0.212921

Thermal correction to Gibbs Free Energy= 0.159071

Sum of electronic and ZPE= -674.295135

Sum of electronic and thermal Energies= -674.282017

Sum of electronic and thermal Enthalpies= -674.281073

Sum of electronic and thermal Free Energies= -674.334922

|       | E, kcal/mol | CV, cal/(mol·K) | S, cal/(mol·K) |
|-------|-------------|-----------------|----------------|
| Total | 133.017     | 49.475          | 113.336        |

B,0,-2.824301116,0.6716934891,-0.0025367733

O,0,-3.4710611894,0.1767293899,1.1076623479

O,0,-3.6295825971,0.6632682532,-1.1183081516

C,0,-4.8571024385,0.0038802614,-0.7662407321

C,0,-4.8734851632,0.150519731,0.795439461

C,0,-6.0158180262,0.6832230167,-1.4748794657

H,0,-6.9750221971,0.2670329628,-1.1326670769

H,0,-6.0135346981,1.7655685362,-1.2935549736

H,0,-5.9356000544,0.5148777366,-2.5587845877

C,0,-4.737821101,-1.4493428598,-1.2165082274

H,0,-5.6710873559,-2.0034525662,-1.0433119804

H,0,-4.5151325619,-1.4687508987,-2.2930602064

H,0,-3.9209253432,-1.960430915,-0.6857080873

C,0,-5.537708033,-0.9990206176,1.5313480409

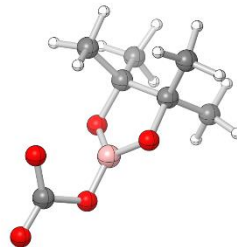

H,0,-6.5902219748,-1.0946917497,1.2254882981  
H,0,-5.0248883713,-1.9500368207,1.3382483387  
H,0,-5.5116035106,-0.8071642346,2.6139530675  
C,0,-5.4572255783,1.486614052,1.2476938354  
H,0,-4.963536667,2.3170680974,0.7229923783  
H,0,-6.5418373739,1.5345935602,1.0769992941  
H,0,-5.2670739722,1.6056496922,2.3243335394  
O,0,-1.4929726002,0.9991422112,-0.0298780029  
C,0,-1.2663841472,2.3569030614,0.3668279189  
O,0,-0.0897125021,2.6874533283,0.4241619384  
O,0,-2.3173977805,2.9840240018,0.5839766246

## X-Ray Crystallographic Data

Methyl 2-((2*S*,3*R*)-2,7'-diethyl-5'-iodo-2'-oxo-4,5-dihydro-2*H*-spiro[furan-3,3'-indolin]-2-yl)acetate (S27)

CCDC 1959507

---

Bond precision: C-C = 0.0051 Å Wavelength = 0.71073

Cell: a = 14.7645(4) b = 7.7901(2) c = 16.2371(4)

$\alpha = 90$   $\beta = 107.458(2)$   $\gamma = 90$

Temperature: 100 K

|                                     | Calculated                                       | Reported                                         |
|-------------------------------------|--------------------------------------------------|--------------------------------------------------|
| Volume                              | 1781.52(8)                                       | 1781.52(8)                                       |
| Space group                         | P 21/c                                           | P 1 21/c 1                                       |
| Hall group                          | -P 2ybc                                          | -P 2ybc                                          |
| Moiety formula                      | C <sub>18</sub> H <sub>22</sub> INO <sub>4</sub> | C <sub>18</sub> H <sub>22</sub> INO <sub>4</sub> |
| Sum formula                         | C <sub>18</sub> H <sub>22</sub> INO <sub>4</sub> | C <sub>18</sub> H <sub>22</sub> INO <sub>4</sub> |
| M <sub>r</sub>                      | 443.27                                           | 443.26                                           |
| D <sub>x</sub> , g cm <sup>-3</sup> | 1.653                                            | 1.653                                            |
| Z                                   | 4                                                | 4                                                |
| Mu (mm <sup>-1</sup> )              | 1.819                                            | 1.819                                            |
| F <sub>000</sub>                    | 888.0                                            | 888.0                                            |
| F <sub>000</sub> '                  | 886.48                                           |                                                  |
| h,k,l <sub>max</sub>                | 17,9,19                                          | 17,9,19                                          |
| N <sub>ref</sub>                    | 3318                                             | 3318                                             |
| T <sub>min</sub> , T <sub>max</sub> | 0.419, 0.549                                     | 0.901, 1.000                                     |
| T <sub>min</sub> '                  | 0.387                                            |                                                  |

Correction method= # Reported T Limits:  $T_{\min}=0.901$   $T_{\max}=1.000$

AbsCorr = MULTI-SCAN

Data completeness= 1.000

Theta(max)= 25.490

R(reflections)= 0.0336(3312)

wR2(reflections)= 0.0920(3318)

S = 1.100

$N_{\text{par}}= 220$

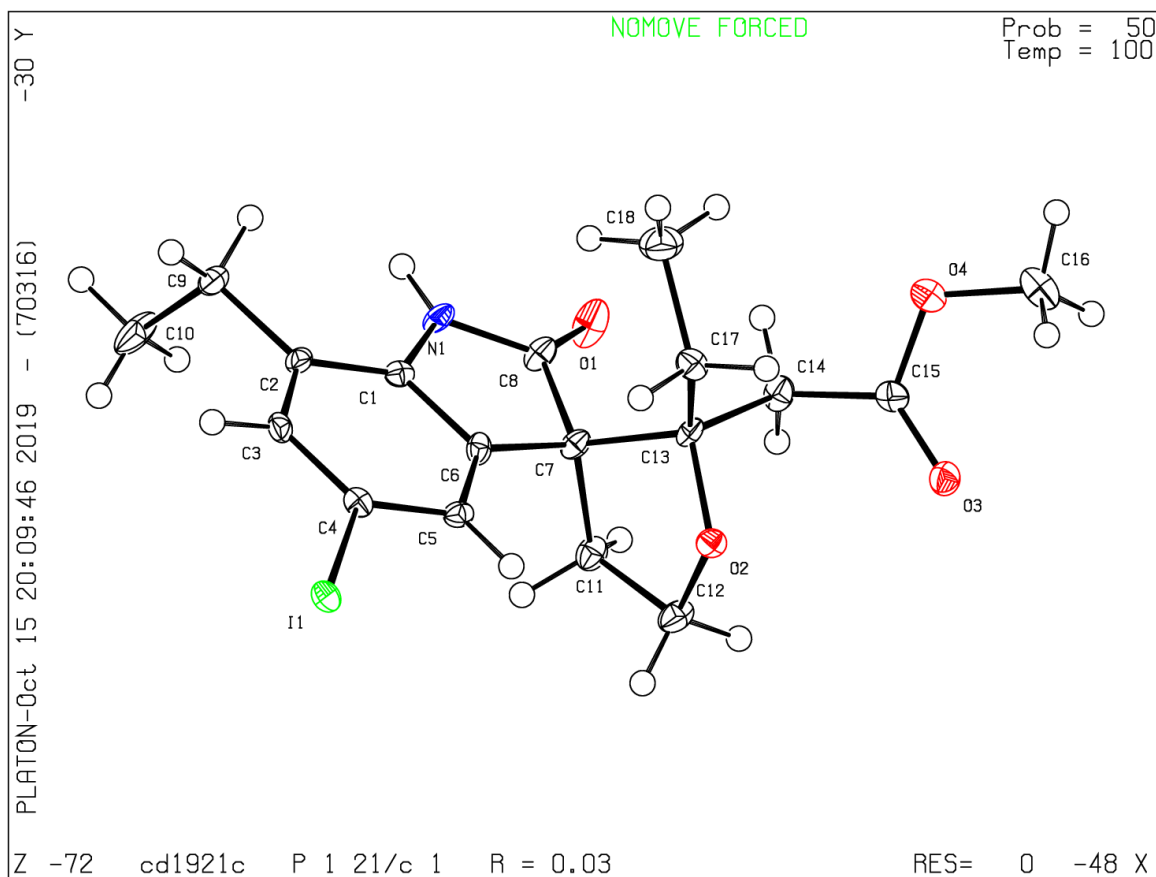

**2-(4-(2-(4-Methoxyphenyl)propan-2-yl)phenyl)-4,4,5,5-tetramethyl-1,3,2-dioxaborolane (11)**

**CCDC 1959288**

---

Bond precision: C–C = 0.0030 Å Wavelength = 0.71073

Cell: a = 25.9588(8) b = 6.6139(2) c = 11.2968(3)

$\alpha = 90$   $\beta = 92.514(2)$   $\gamma = 90$

Temperature: 98 K

|                                     | Calculated                                      | Reported                                        |
|-------------------------------------|-------------------------------------------------|-------------------------------------------------|
| Volume                              | 1937.67(10)                                     | 1937.67(10)                                     |
| Space group                         | P 21/c                                          | P 1 21/c 1                                      |
| Hall group                          | -P 2ybc                                         | -P 2ybc                                         |
| Moiety formula                      | C <sub>22</sub> H <sub>29</sub> BO <sub>3</sub> | C <sub>22</sub> H <sub>29</sub> BO <sub>3</sub> |
| Sum formula                         | C <sub>22</sub> H <sub>29</sub> BO <sub>3</sub> | C <sub>22</sub> H <sub>29</sub> BO <sub>3</sub> |
| M <sub>r</sub>                      | 352.26                                          | 352.26                                          |
| D <sub>x</sub> , g cm <sup>-3</sup> | 1.207                                           | 1.208                                           |
| Z                                   | 4                                               | 4                                               |
| Mu (mm <sup>-1</sup> )              | 0.077                                           | 0.077                                           |
| F000                                | 760.0                                           | 760.0                                           |
| F000'                               | 760.33                                          |                                                 |
| h,k,l <sub>max</sub>                | 30,7,13                                         | 30,7,13                                         |
| N <sub>ref</sub>                    | 3429                                            | 3427                                            |
| T <sub>min</sub> , T <sub>max</sub> | 0.982, 0.996                                    | 0.736, 1.000                                    |
| T <sub>min</sub> '                  | 0.962                                           |                                                 |

Correction method= # Reported T Limits:  $T_{\min}=0.736$   $T_{\max}=1.000$

AbsCorr = MULTI-SCAN

Data completeness= 0.999

Theta(max)= 25.050

R(reflections)= 0.0624(3337)

wR2(reflections)= 0.1244(3427)

S = 1.064

$N_{\text{par}}= 242$

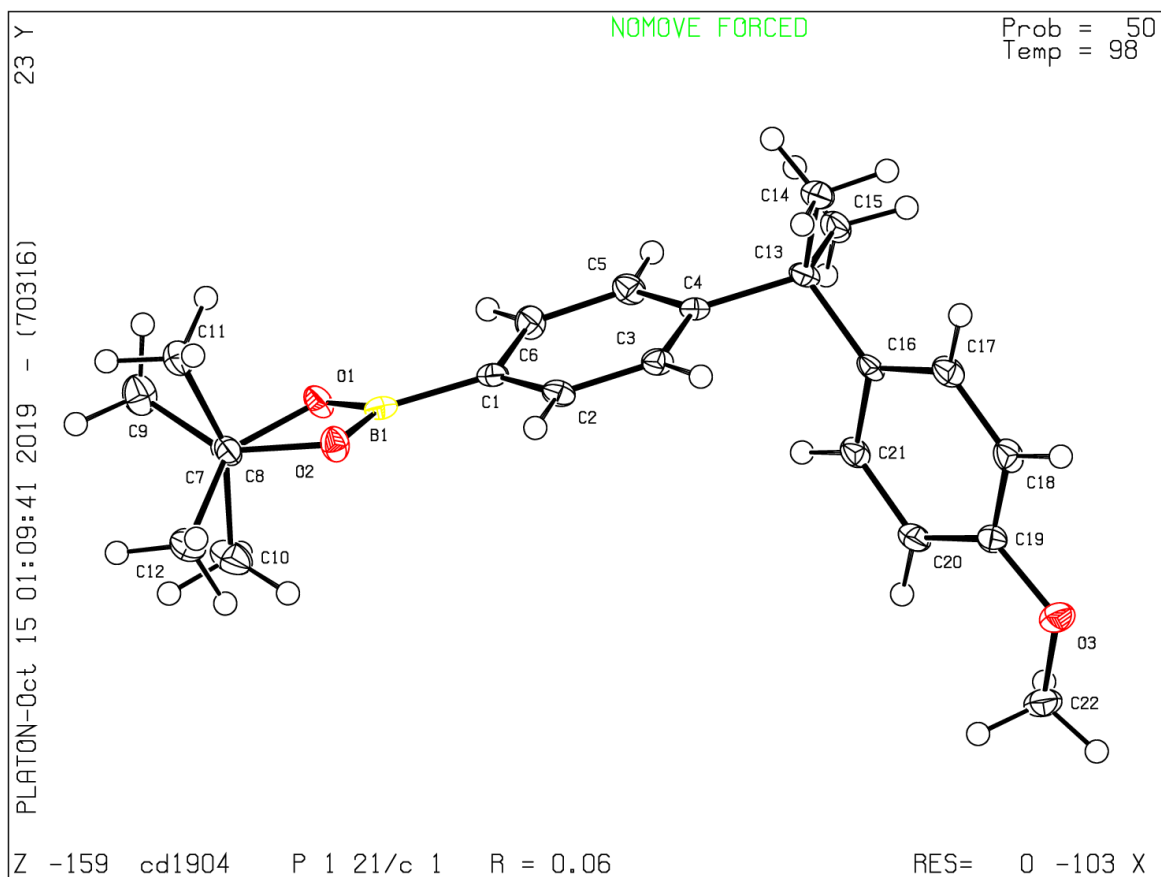

*tert*-Butyl (4-(4,4,5,5-tetramethyl-1,3,2-dioxaborolan-2-yl)phenyl)carbamate (15)

CCDC 1959289

---

Bond precision: C–C = 0.0031 Å Wavelength = 0.71073

Cell: a = 10.0080(3) b = 19.8705(8) c = 9.1491(2)

$\alpha = 90$   $\beta = 90$   $\gamma = 90$

Temperature: 100 K

|                                     | Calculated                                       | Reported                                         |
|-------------------------------------|--------------------------------------------------|--------------------------------------------------|
| Volume                              | 1819.43(10)                                      | 1819.43(10)                                      |
| Space group                         | P n a 21                                         | P n a 21                                         |
| Hall group                          | P 2c -2n                                         | P 2c -2n                                         |
| Moiety formula                      | C <sub>17</sub> H <sub>26</sub> BNO <sub>4</sub> | C <sub>17</sub> H <sub>26</sub> BNO <sub>4</sub> |
| Sum formula                         | C <sub>17</sub> H <sub>26</sub> BNO <sub>4</sub> | C <sub>17</sub> H <sub>26</sub> BNO <sub>4</sub> |
| M <sub>r</sub>                      | 319.20                                           | 319.20                                           |
| D <sub>x</sub> , g cm <sup>-3</sup> | 1.165                                            | 1.165                                            |
| Z                                   | 4                                                | 4                                                |
| Mu (mm <sup>-1</sup> )              | 0.081                                            | 0.081                                            |
| F <sub>000</sub>                    | 688.0                                            | 688.0                                            |
| F <sub>000</sub> '                  | 688.33                                           |                                                  |
| h,k,l <sub>max</sub>                | 12,24,11                                         | 12,24,11                                         |
| N <sub>ref</sub>                    | 3591 [1915]                                      | 3561                                             |
| T <sub>min</sub> , T <sub>max</sub> | 0.984, 0.998                                     | 0.870, 1.000                                     |
| T <sub>min</sub> '                  | 0.970                                            |                                                  |

Correction method= # Reported T Limits: T<sub>min</sub>=0.870 T<sub>max</sub>=1.000

AbsCorr = MULTI-SCAN

Data completeness= 1.86/0.99

Theta(max)= 25.998

R(reflections)= 0.0347(3472)

wR2(reflections)= 0.0792(3561)

S = 1.090

N<sub>par</sub>= 218

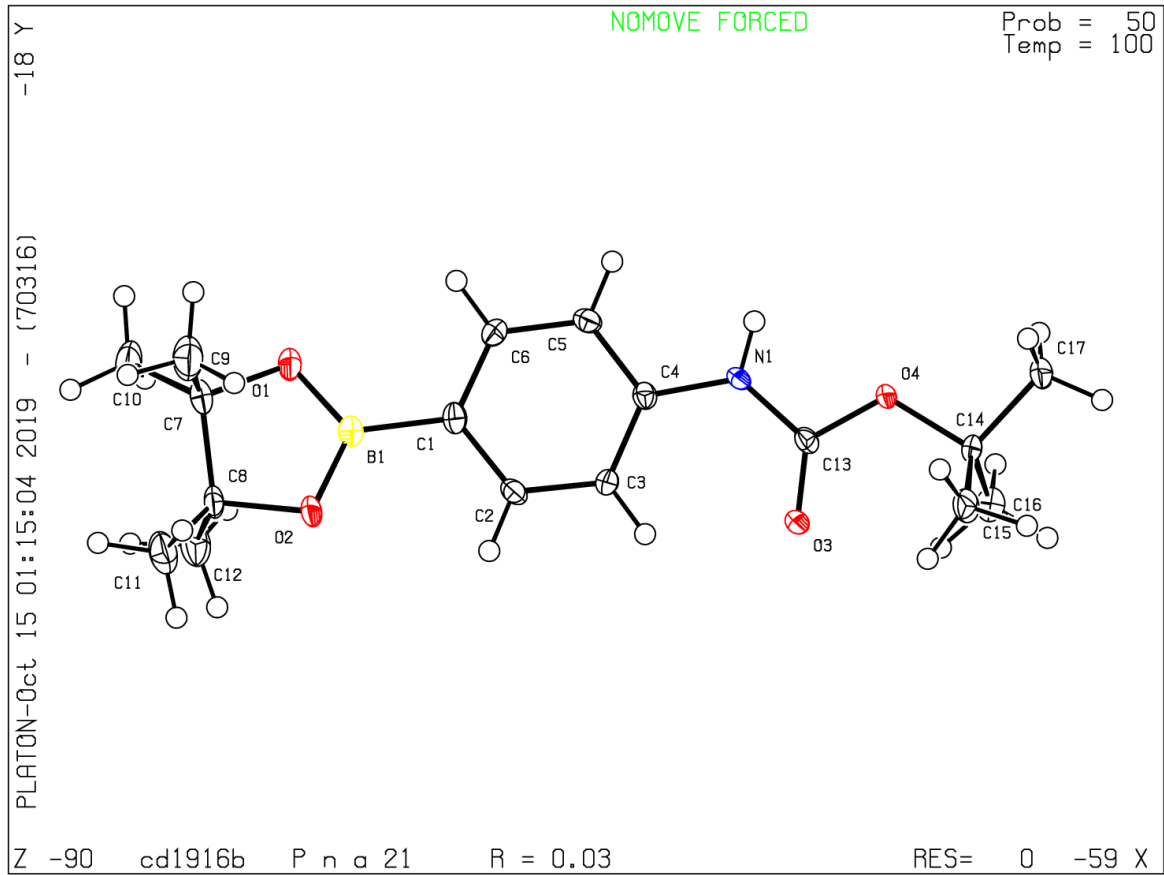



**1-(Indolin-1-yl)-2-(4-(4,4,5,5-tetramethyl-1,3,2-dioxaborolan-2-yl)phenyl)ethan-1-one**

(23)

CCDC 1959498

---

Bond precision: C–C = 0.0020 Å Wavelength = 0.71073

Cell: a = 9.1074(6) b = 10.4748(6) c = 11.1129(7)

$\alpha$  = 90.070(5)  $\beta$  = 103.031(5)  $\gamma$  = 112.623(6)

Temperature: 97 K

|                                     | Calculated                                       | Reported                                         |
|-------------------------------------|--------------------------------------------------|--------------------------------------------------|
| Volume                              | 948.81(11)                                       | 948.81(11)                                       |
| Space group                         | P -1                                             | P -1                                             |
| Hall group                          | -P 1                                             | -P 1                                             |
| Moiety formula                      | C <sub>22</sub> H <sub>26</sub> BNO <sub>3</sub> | C <sub>22</sub> H <sub>26</sub> BNO <sub>3</sub> |
| Sum formula                         | C <sub>22</sub> H <sub>26</sub> BNO <sub>3</sub> | C <sub>22</sub> H <sub>26</sub> BNO <sub>3</sub> |
| M <sub>r</sub>                      | 363.25                                           | 363.25                                           |
| D <sub>x</sub> , g cm <sup>-3</sup> | 1.271                                            | 1.271                                            |
| Z                                   | 2                                                | 2                                                |
| Mu (mm <sup>-1</sup> )              | 0.083                                            | 0.083                                            |
| F000                                | 388.0                                            | 388.0                                            |
| F000'                               | 388.17                                           |                                                  |
| h,k,l <sub>max</sub>                | 11,12,13                                         | 11,12,13                                         |
| N <sub>ref</sub>                    | 3731                                             | 3729                                             |
| T <sub>min</sub> , T <sub>max</sub> | 0.980, 0.986                                     | 0.972, 1.000                                     |
| T <sub>min</sub> '                  | 0.973                                            |                                                  |

Correction method= # Reported T Limits:  $T_{\min}=0.972$   $T_{\max}=1.000$

AbsCorr = MULTI-SCAN

Data completeness= 0.999

Theta(max)= 25.997

R(reflections)= 0.0474(3684)

wR2(reflections)= 0.0998(3729)

S = 1.006

$N_{\text{par}}=248$

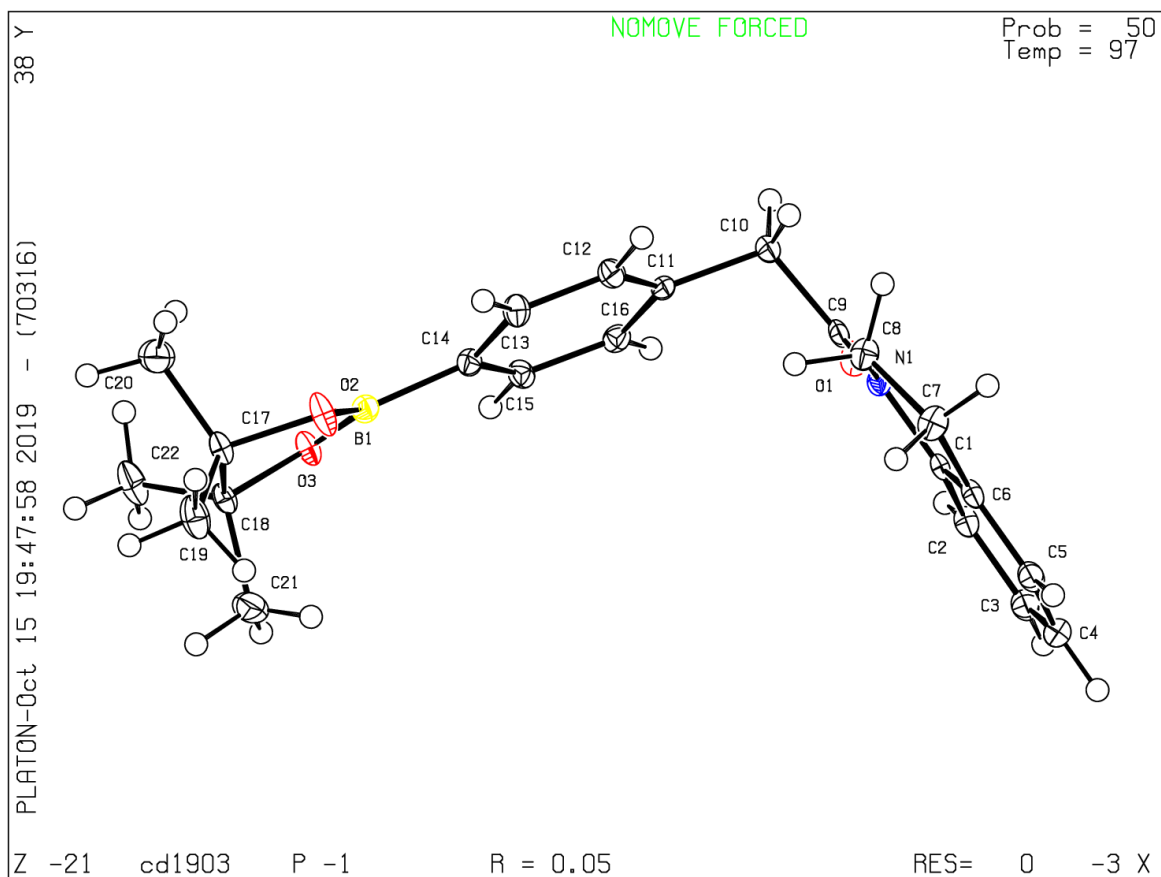

Trifluoro(3-(methylsulfonyl)phenyl)- $\lambda^4$ -borane, potassium salt (43)

CCDC 1946411

Bond precision: C–C = 0.0028 Å Wavelength = 0.71073

Cell: a = 13.0091(8) b = 6.6126(3) c = 12.8870(7)

$\alpha = 90$   $\beta = 114.410(7)$   $\gamma = 90$

Temperature: 100 K

|                                     | Calculated                                                      | Reported                                                        |
|-------------------------------------|-----------------------------------------------------------------|-----------------------------------------------------------------|
| Volume                              | 1009.50(11)                                                     | 1009.50(11)                                                     |
| Space group                         | P 21/c                                                          | P 1 21/c 1                                                      |
| Hall group                          | -P 2ybc                                                         | -P 2ybc                                                         |
| Moiety formula                      | C <sub>7</sub> H <sub>7</sub> BF <sub>3</sub> KO <sub>2</sub> S | C <sub>7</sub> H <sub>7</sub> BF <sub>3</sub> KO <sub>2</sub> S |
| Sum formula                         | C <sub>7</sub> H <sub>7</sub> BF <sub>3</sub> KO <sub>2</sub> S | C <sub>7</sub> H <sub>7</sub> BF <sub>3</sub> KO <sub>2</sub> S |
| M <sub>r</sub>                      | 262.10                                                          | 262.10                                                          |
| D <sub>x</sub> , g cm <sup>-3</sup> | 1.724                                                           | 1.725                                                           |
| Z                                   | 4                                                               | 4                                                               |
| Mu (mm <sup>-1</sup> )              | 0.750                                                           | 0.750                                                           |
| F <sub>000</sub>                    | 528.0                                                           | 528.0                                                           |
| F <sub>000</sub> '                  | 529.65                                                          |                                                                 |
| h,k,l <sub>max</sub>                | 16,8,16                                                         | 16,8,16                                                         |
| N <sub>ref</sub>                    | 2065                                                            | 2061                                                            |
| T <sub>min</sub> , T <sub>max</sub> | 0.921, 0.969                                                    | 0.709, 1.000                                                    |
| T <sub>min</sub> '                  | 0.829                                                           |                                                                 |

Correction method = # Reported T Limits: T<sub>min</sub> = 0.709 T<sub>max</sub> = 1.000

AbsCorr = MULTI-SCAN

Data completeness = 0.998

Theta(max) = 26.369

R(reflections) = 0.0262(1833)

wR2(reflections) = 0.0662(2061)

S = 1.037

N<sub>par</sub> = 137

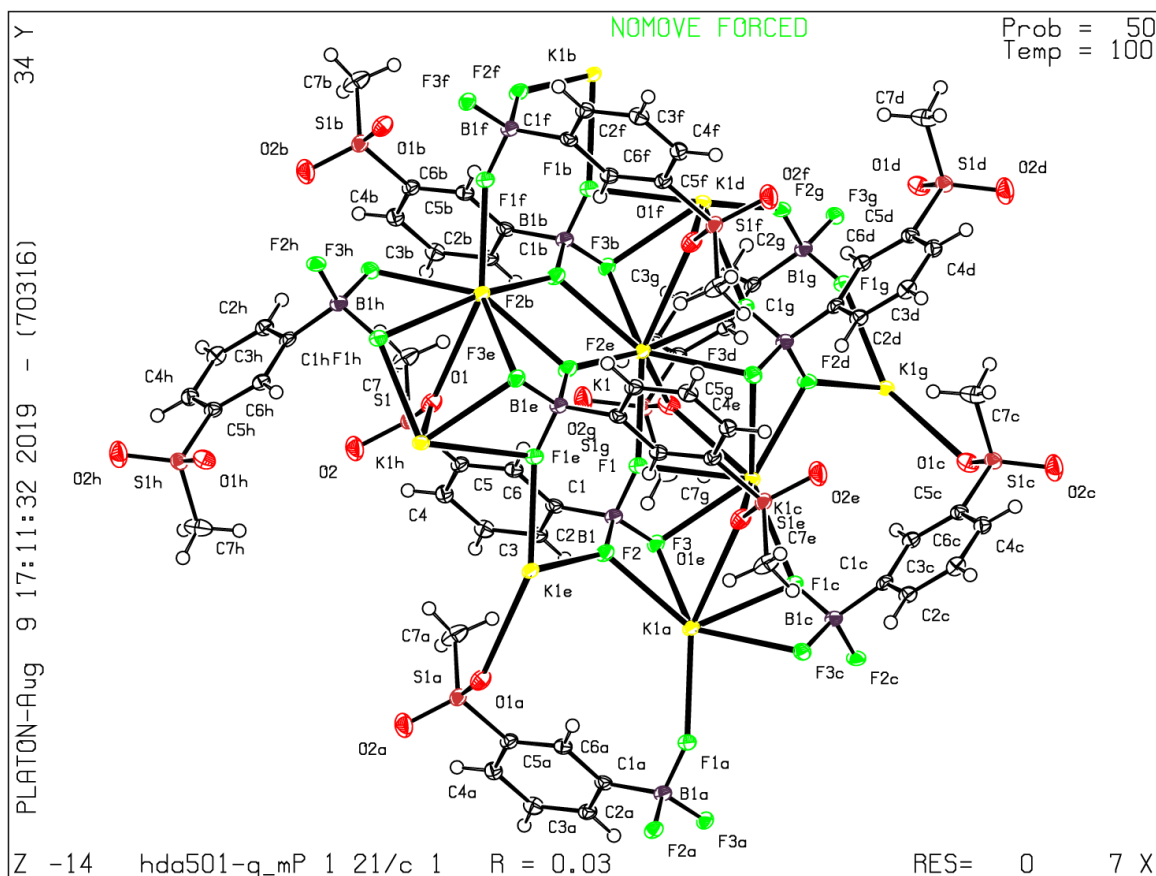

4-(4,4,5,5-Tetramethyl-1,3,2-dioxaborolan-2-yl)-1H-indole (44)

CCDC 1959497

Bond precision: C–C = 0.0020 Å Wavelength = 0.71073

Cell: a = 20.3444(5) b = 9.5619(2) c = 13.8608(3)

$\alpha = 90$   $\beta = 103.721(2)$   $\gamma = 90$

Temperature: 98 K

|                                     | Calculated                                       | Reported                                         |
|-------------------------------------|--------------------------------------------------|--------------------------------------------------|
| Volume                              | 2619.41(10)                                      | 2619.41(10)                                      |
| Space group                         | P 21/c                                           | P 1 21/c 1                                       |
| Hall group                          | -P 2ybc                                          | -P 2ybc                                          |
| Moiety formula                      | C <sub>14</sub> H <sub>18</sub> BNO <sub>2</sub> | C <sub>14</sub> H <sub>18</sub> BNO <sub>2</sub> |
| Sum formula                         | C <sub>14</sub> H <sub>18</sub> BNO <sub>2</sub> | C <sub>14</sub> H <sub>18</sub> BNO <sub>2</sub> |
| M <sub>r</sub>                      | 243.10                                           | 243.10                                           |
| D <sub>x</sub> , g cm <sup>-3</sup> | 1.233                                            | 1.233                                            |
| Z                                   | 8                                                | 8                                                |
| Mu (mm <sup>-1</sup> )              | 0.080                                            | 0.080                                            |
| F <sub>000</sub>                    | 1040.0                                           | 1040.0                                           |
| F <sub>000</sub> '                  | 1040.44                                          |                                                  |
| h,k,l <sub>max</sub>                | 25,11,17                                         | 25,11,17                                         |
| N <sub>ref</sub>                    | 5152                                             | 5148                                             |
| T <sub>min</sub> , T <sub>max</sub> | 0.969, 0.990                                     | 0.971, 1.000                                     |
| T <sub>min</sub> '                  | 0.969                                            |                                                  |

Correction method= # Reported T Limits: T<sub>min</sub>=0.971 T<sub>max</sub>=1.000

AbsCorr = MULTI-SCAN

Data completeness= 0.999

Theta(max)= 25.998

R(reflections)= 0.0488(5080)

wR2(reflections)= 0.1049(5148)

S = 1.069

N<sub>par</sub>= 339

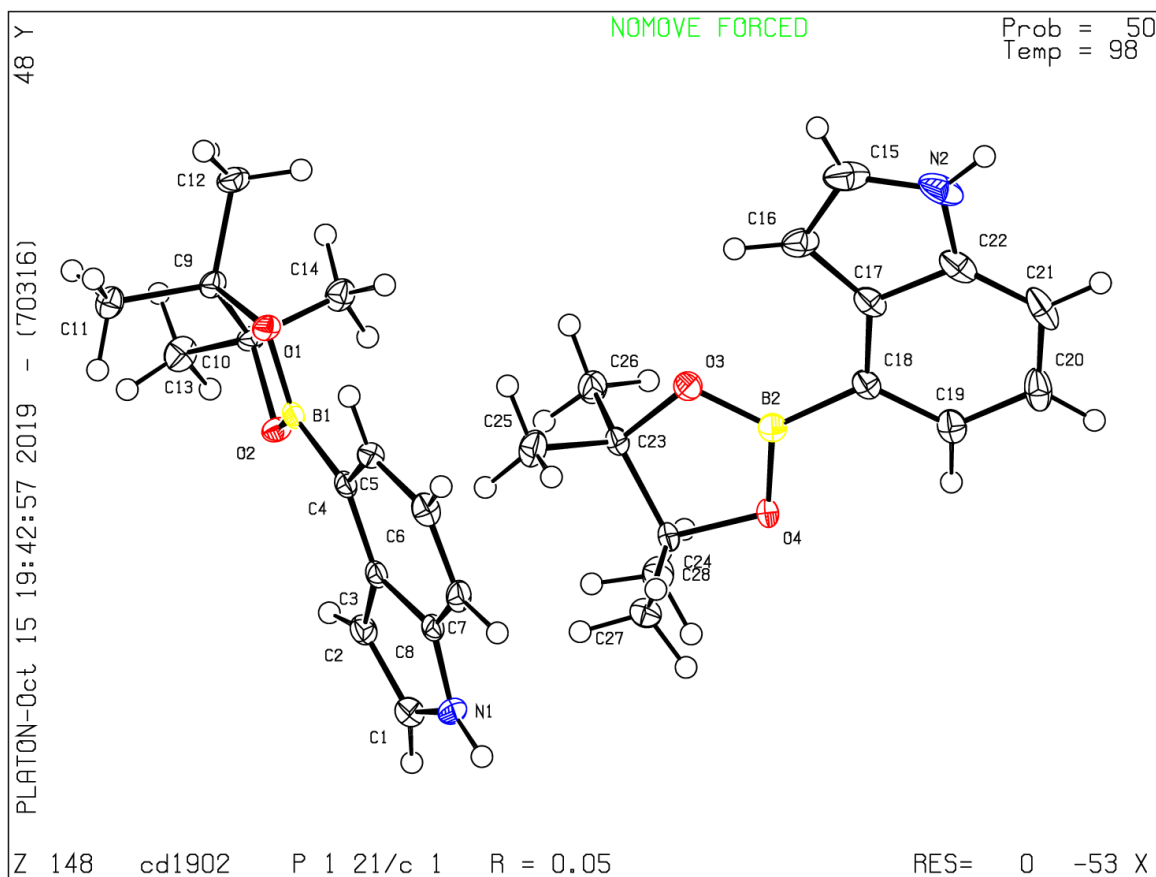

**Indolin-1-yl(4-(4,4,5,5-tetramethyl-1,3-dioxolan-2-yl)phenyl)methanone (45-Bpin)**

**CCDC 1946412**

---

Bond precision: C–C = 0.0021 Å Wavelength = 0.71073

Cell: a = 7.9153(2) b = 9.4724(2) c = 12.8773(2)

$\alpha$  = 100.926(2)  $\beta$  = 101.026(2)  $\gamma$  = 94.341(2)

Temperature: 98 K

|                                     | Calculated                                       | Reported                                         |
|-------------------------------------|--------------------------------------------------|--------------------------------------------------|
| Volume                              | 924.20(4)                                        | 924.20(3)                                        |
| Space group                         | P -1                                             | P -1                                             |
| Hall group                          | -P 1                                             | -P 1                                             |
| Moiety formula                      | C <sub>21</sub> H <sub>24</sub> BNO <sub>3</sub> | C <sub>21</sub> H <sub>24</sub> BNO <sub>3</sub> |
| Sum formula                         | C <sub>21</sub> H <sub>24</sub> BNO <sub>3</sub> | C <sub>21</sub> H <sub>24</sub> BNO <sub>3</sub> |
| M <sub>r</sub>                      | 349.22                                           | 349.22                                           |
| D <sub>x</sub> , g cm <sup>-3</sup> | 1.255                                            | 1.255                                            |
| Z                                   | 2                                                | 2                                                |
| Mu (mm <sup>-1</sup> )              | 0.082                                            | 0.082                                            |
| F <sub>000</sub>                    | 372.0                                            | 372.0                                            |
| F <sub>000</sub> '                  | 372.16                                           |                                                  |
| h,k,l <sub>max</sub>                | 9,11,15                                          | 9,11,15                                          |
| N <sub>ref</sub>                    | 3451                                             | 3446                                             |
| T <sub>min</sub> , T <sub>max</sub> | 0.973, 0.986                                     | 0.991, 1.000                                     |
| T <sub>min</sub> '                  | 0.973                                            |                                                  |

Correction method = # Reported T Limits: T<sub>min</sub> = 0.991 T<sub>max</sub> = 1.000

AbsCorr = MULTI-SCAN

Data completeness = 0.999

Theta(max) = 25.500

R(reflections) = 0.0458(3414)

wR2(reflections) = 0.1055(3446)

S = 1.055

N<sub>par</sub> = 239

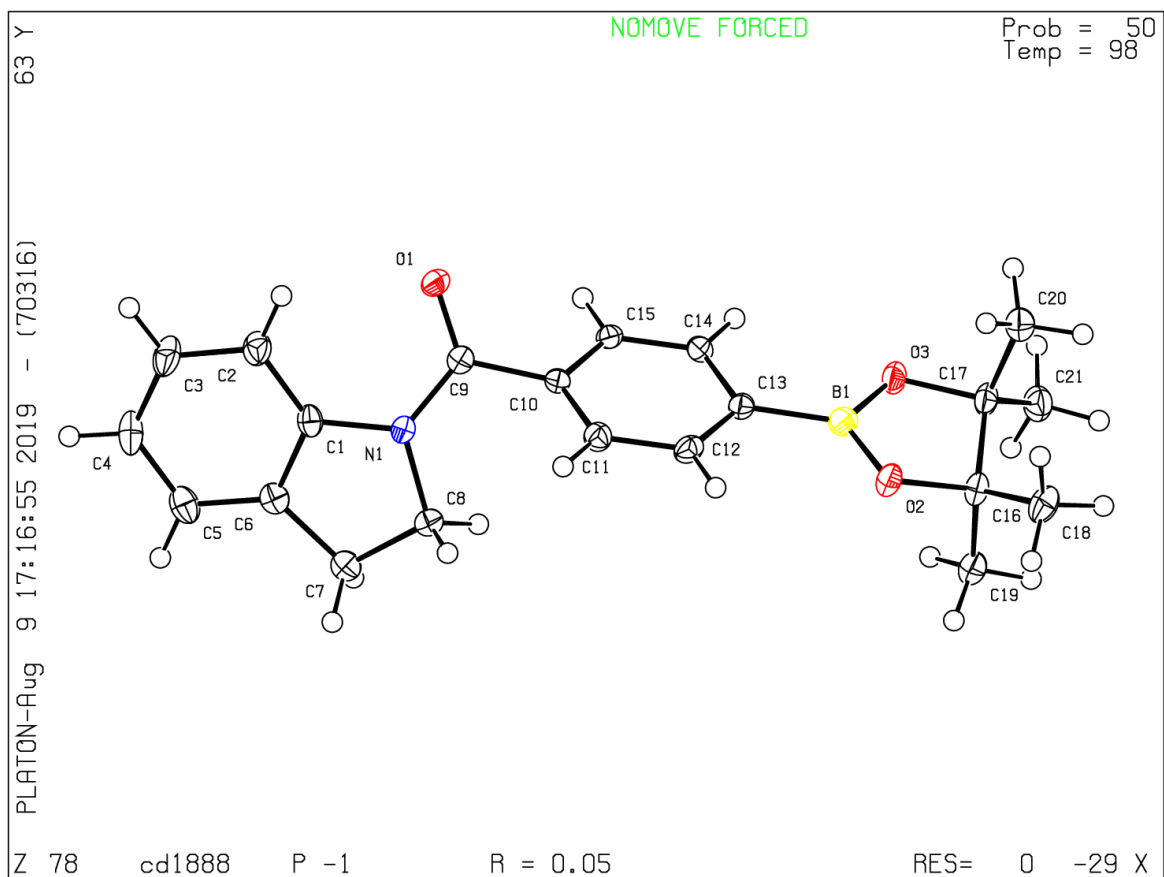

**3-Ethyl-3-(4-(4,4,5,5-tetramethyl-1,3,2-dioxaborolan-2-yl)phenyl)piperidine-2,6-dione**

(47)

CCDC 1946413

Bond precision: C-C = 0.0053 Å

Wavelength = 0.71073

Cell: a = 27.1253(12) b = 6.6649(2) c = 12.1310(6)



$$\alpha = 90 \quad \beta = 119.012(6) \quad \gamma = 90$$

Temperature: 98 K

|                                     | Calculated                                       | Reported                                         |
|-------------------------------------|--------------------------------------------------|--------------------------------------------------|
| Volume                              | 1917.93(18)                                      | 1917.93(17)                                      |
| Space group                         | C 2                                              | C 1 2 1                                          |
| Hall group                          | C 2y                                             | C 2y                                             |
| Moiety formula                      | C <sub>19</sub> H <sub>26</sub> BNO <sub>4</sub> | C <sub>19</sub> H <sub>26</sub> BNO <sub>4</sub> |
| Sum formula                         | C <sub>19</sub> H <sub>26</sub> BNO <sub>4</sub> | C <sub>19</sub> H <sub>26</sub> BNO <sub>4</sub> |
| M <sub>r</sub>                      | 343.22                                           | 343.22                                           |
| D <sub>x</sub> , g cm <sup>-3</sup> | 1.189                                            | 1.189                                            |
| Z                                   | 4                                                | 4                                                |
| Mu (mm <sup>-1</sup> )              | 0.082                                            | 0.082                                            |
| F000                                | 736.0                                            | 736.0                                            |
| F000'                               | 736.35                                           |                                                  |
| h,k,l <sub>max</sub>                | 32,8,14                                          | 32,8,14                                          |
| N <sub>ref</sub>                    | 3552 [1940]                                      | 3535                                             |
| T <sub>min</sub> , T <sub>max</sub> | 0.978, 0.986                                     | 0.876, 1.000                                     |
| T <sub>min</sub> '                  | 0.973                                            |                                                  |

Correction method = # Reported T Limits: T<sub>min</sub> = 0.876 T<sub>max</sub> = 1.000

AbsCorr = MULTI-SCAN

Data completeness = 1.82/1.00      Theta(max) = 25.492

R(reflections) = 0.0460(3502)      wR2(reflections) = 0.1275(3535)

S = 1.076      N<sub>par</sub> = 234

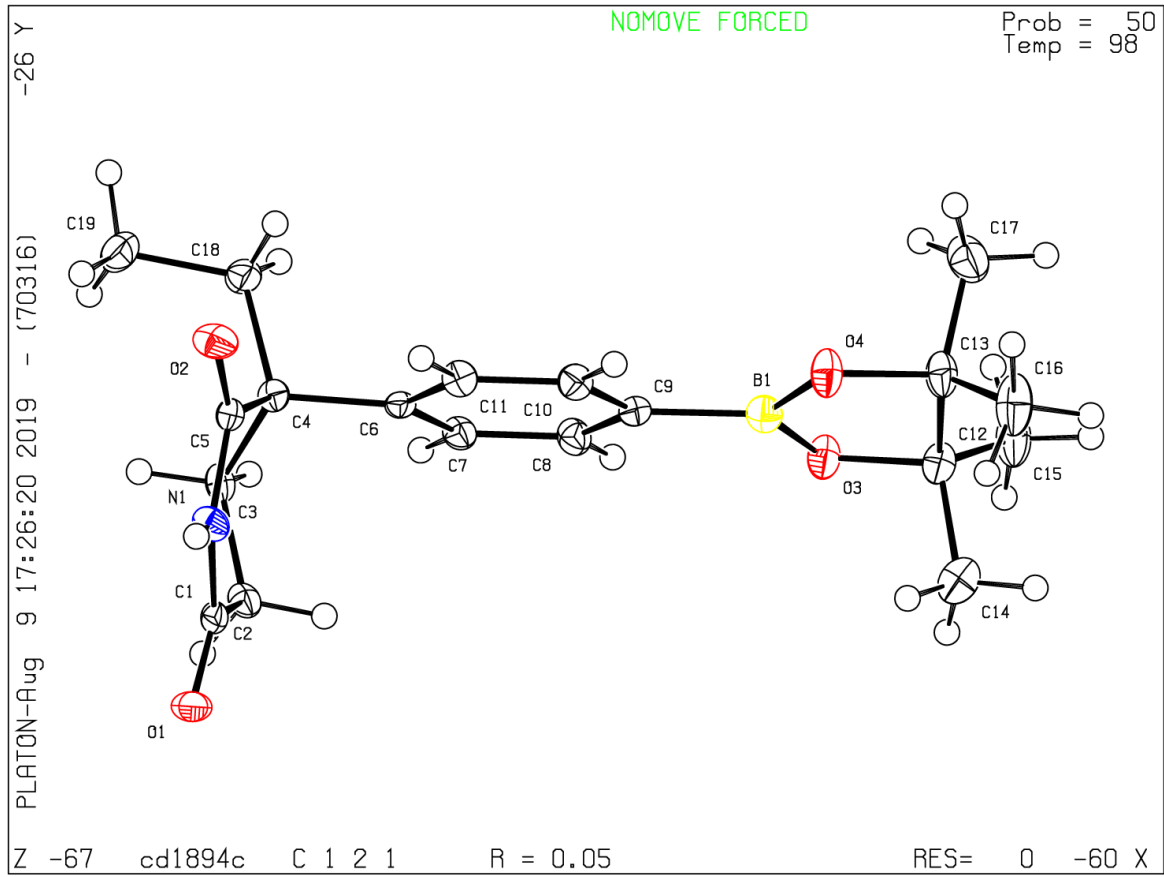

2-(2-Fluoro-4-methylphenyl)-4,4,5,5-tetramethyl-1,3,2-dioxaborolane (53)

CCDC 1959499

---

Bond precision: C–C = 0.0020 Å Wavelength = 0.71073

Cell: a = 13.7679(4) b = 7.5766(2) c = 12.4291(3)

$\alpha = 90$   $\beta = 92.295(2)$   $\gamma = 90$

Temperature: 98 K

|                                     | Calculated                                       | Reported                                         |
|-------------------------------------|--------------------------------------------------|--------------------------------------------------|
| Volume                              | 1295.49(6)                                       | 1295.49(6)                                       |
| Space group                         | P 21/c                                           | P 1 21/c 1                                       |
| Hall group                          | -P 2ybc                                          | -P 2ybc                                          |
| Moiety formula                      | C <sub>13</sub> H <sub>18</sub> BFO <sub>2</sub> | C <sub>13</sub> H <sub>18</sub> BFO <sub>2</sub> |
| Sum formula                         | C <sub>13</sub> H <sub>18</sub> BFO <sub>2</sub> | C <sub>13</sub> H <sub>18</sub> BFO <sub>2</sub> |
| M <sub>r</sub>                      | 236.08                                           | 236.08                                           |
| D <sub>x</sub> , g cm <sup>-3</sup> | 1.210                                            | 1.210                                            |
| Z                                   | 4                                                | 4                                                |
| Mu (mm <sup>-1</sup> )              | 0.088                                            | 0.088                                            |
| F000                                | 504.0                                            | 504.0                                            |
| F000'                               | 504.27                                           |                                                  |
| h,k,l <sub>max</sub>                | 16,9,15                                          | 16,9,15                                          |
| N <sub>ref</sub>                    | 2544                                             | 2544                                             |
| T <sub>min</sub> , T <sub>max</sub> | 0.982, 0.997                                     | 0.984, 1.000                                     |
| T <sub>min</sub> '                  | 0.959                                            |                                                  |

Correction method= # Reported T Limits: T<sub>min</sub>=0.984 T<sub>max</sub>=1.000

AbsCorr = MULTI-SCAN

Data completeness= 1.000

Theta(max)= 25.999

R(reflections)= 0.0493(2515)

wR2(reflections)= 0.1179(2544)

S = 1.071

N<sub>par</sub>= 159

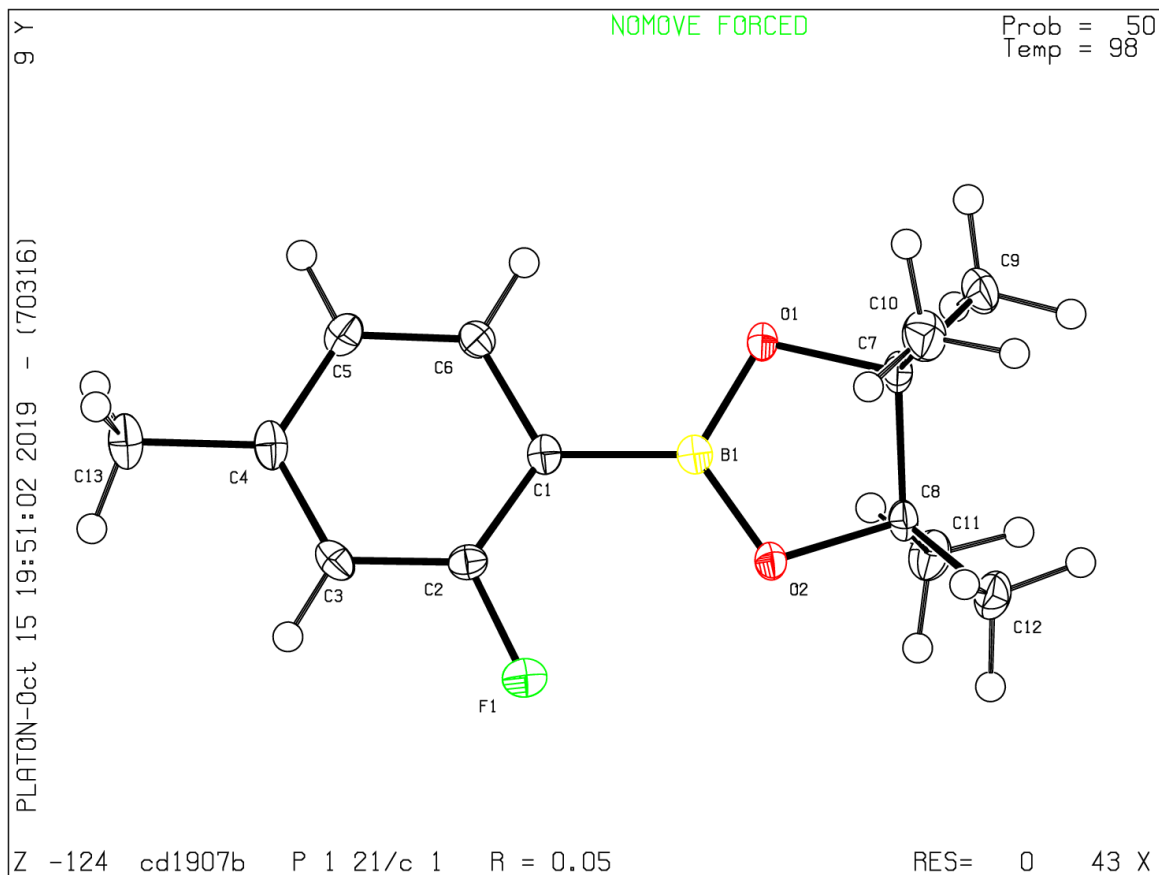

# 4,4,5,5-Tetramethyl-2-(4-(trifluoromethyl)phenyl)-1,3,2-dioxaborolane (54)

CCDC 1946414

Bond precision: C–C = 0.0057 Å Wavelength = 0.71073

Cell: a = 8.4082(5) b = 8.7515(5) c = 10.3759(3)

$\alpha = 107.497(4)$   $\beta = 105.684(4)$   $\gamma = 97.298(5)$

Temperature: 98 K

|                                     | Calculated                                                     | Reported                                                       |
|-------------------------------------|----------------------------------------------------------------|----------------------------------------------------------------|
| Volume                              | 682.79(7)                                                      | 682.79(6)                                                      |
| Space group                         | P -1                                                           | P -1                                                           |
| Hall group                          | -P 1                                                           | -P 1                                                           |
| Moiety formula                      | C <sub>13</sub> H <sub>16</sub> BF <sub>3</sub> O <sub>2</sub> | C <sub>13</sub> H <sub>16</sub> BF <sub>3</sub> O <sub>2</sub> |
| Sum formula                         | C <sub>13</sub> H <sub>16</sub> BF <sub>3</sub> O <sub>2</sub> | C <sub>13</sub> H <sub>16</sub> BF <sub>3</sub> O <sub>2</sub> |
| M <sub>r</sub>                      | 272.07                                                         | 272.07                                                         |
| D <sub>x</sub> , g cm <sup>-3</sup> | 1.323                                                          | 1.323                                                          |
| Z                                   | 2                                                              | 2                                                              |
| Mu (mm <sup>-1</sup> )              | 0.113                                                          | 0.113                                                          |
| F <sub>000</sub>                    | 284.0                                                          | 284.0                                                          |
| F <sub>000</sub> '                  | 284.20                                                         |                                                                |
| h,k,l <sub>max</sub>                | 10,10,12                                                       | 10,10,12                                                       |
| N <sub>ref</sub>                    | 2424                                                           | 4483                                                           |
| T <sub>min</sub> , T <sub>max</sub> | 0.980, 0.989                                                   | 0.981, 1.000                                                   |
| T <sub>min</sub> '                  | 0.972                                                          |                                                                |

Correction method = # Reported T Limits: T<sub>min</sub> = 0.981 T<sub>max</sub> = 1.000

AbsCorr = MULTI-SCAN

Data completeness = 1.849

Theta(max) = 25.049

R(reflections) = 0.0758(3779)

wR2(reflections) = 0.1491(4483)

S = 1.091

N<sub>par</sub> = 176

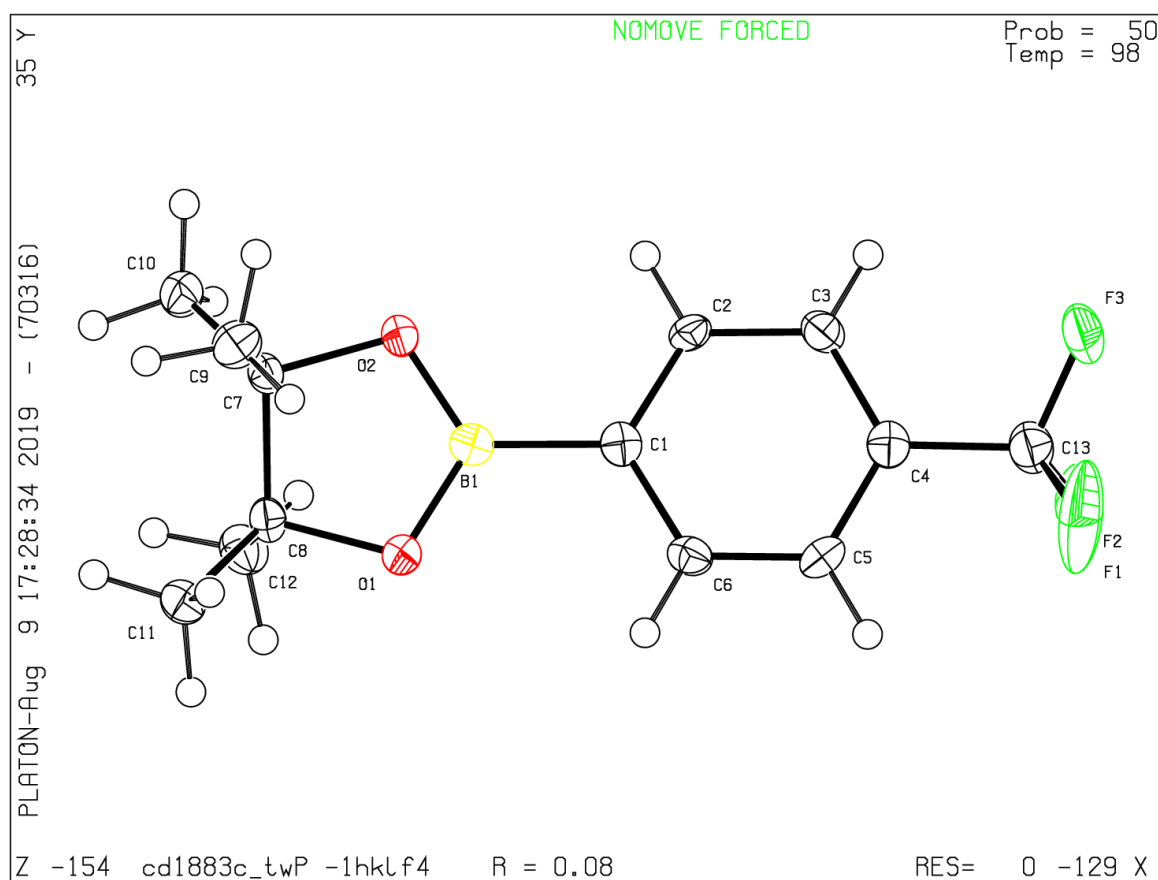

## 2-(3-Fluoro-4-methoxyphenyl)-4,4,5,5-tetramethyl-1,3,2-dioxaborolane (56)

CCDC 1946415

---

Bond precision: C–C = 0.0018 Å Wavelength = 0.71073

Cell: a = 6.7381(2) b = 12.3279(4) c = 15.8619(5)

$\alpha = 90$   $\beta = 96.910(3)$   $\gamma = 90$

Temperature: 98 K

|                                     | Calculated                                       | Reported                                         |
|-------------------------------------|--------------------------------------------------|--------------------------------------------------|
| Volume                              | 1308.02(7)                                       | 1308.02(7)                                       |
| Space group                         | P 21/c                                           | P 1 21/c 1                                       |
| Hall group                          | -P 2ybc                                          | -P 2ybc                                          |
| Moiety formula                      | C <sub>13</sub> H <sub>18</sub> BFO <sub>3</sub> | C <sub>13</sub> H <sub>18</sub> BFO <sub>3</sub> |
| Sum formula                         | C <sub>13</sub> H <sub>18</sub> BFO <sub>3</sub> | C <sub>13</sub> H <sub>18</sub> BFO <sub>3</sub> |
| M <sub>r</sub>                      | 252.08                                           | 252.08                                           |
| D <sub>x</sub> , g cm <sup>-3</sup> | 1.280                                            | 1.280                                            |
| Z                                   | 4                                                | 4                                                |
| Mu (mm <sup>-1</sup> )              | 0.097                                            | 0.097                                            |
| F <sub>000</sub>                    | 536.0                                            | 536.0                                            |
| F <sub>000</sub> '                  | 536.31                                           |                                                  |
| h,k,l <sub>max</sub>                | 8,15,19                                          | 8,15,19                                          |
| N <sub>ref</sub>                    | 2584                                             | 2583                                             |
| T <sub>min</sub> , T <sub>max</sub> | 0.980, 0.995                                     | 0.947, 1.000                                     |
| T <sub>min</sub> '                  | 0.968                                            |                                                  |

Correction method = # Reported T Limits: T<sub>min</sub> = 0.947 T<sub>max</sub> = 1.000

AbsCorr = MULTI-SCAN

Data completeness = 1.000

Theta(max) = 26.000

R(reflections) = 0.0407(2568)

wR2(reflections) = 0.0953(2583)

S = 1.072

N<sub>par</sub> = 168

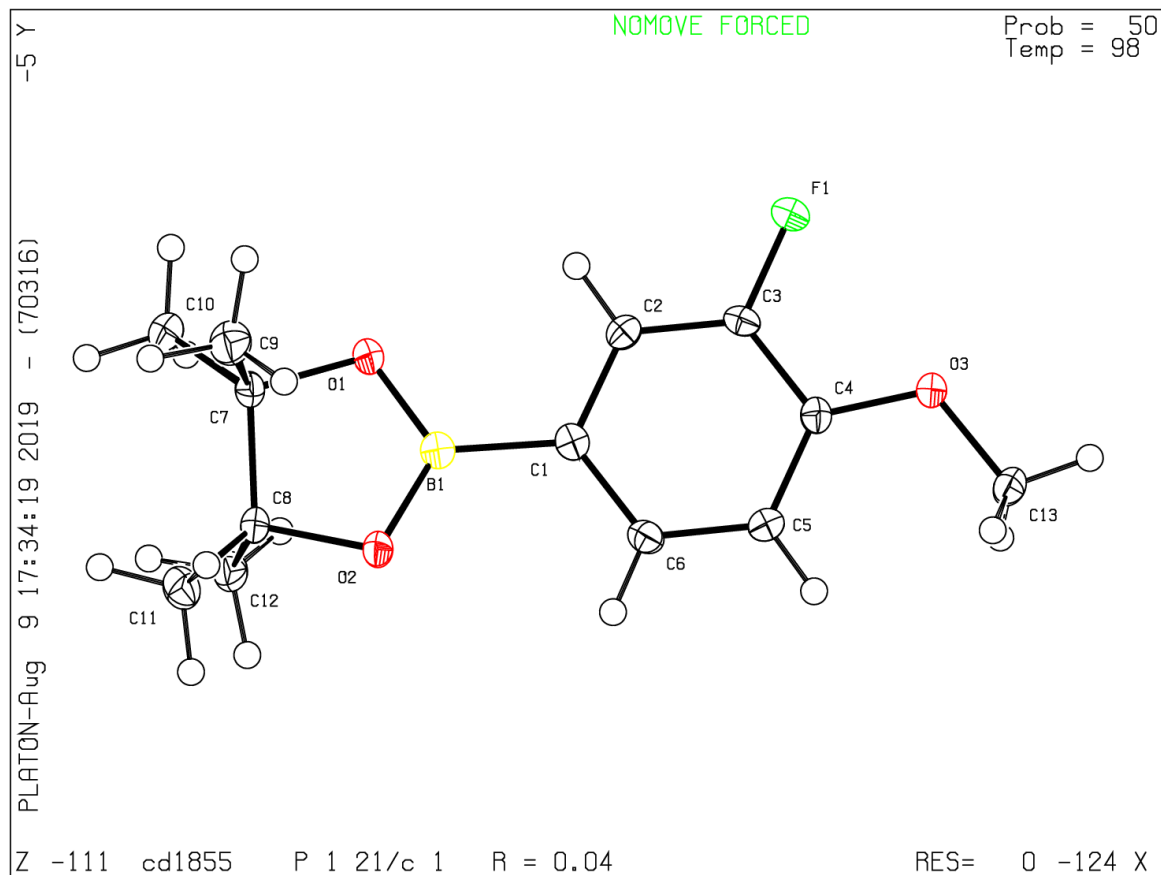



2-(3,4-Dimethoxyphenyl)-4,4,5,5-tetramethyl-1,3,2-dioxaborolane (59)

CCDC 1946416

Bond precision: C—C = 0.0020 Å Wavelength = 0.71073

Cell: a = 17.8482(4) b = 7.0235(2) c = 22.7583(6)

$\alpha = 90$   $\beta = 90$   $\gamma = 90$

Temperature: 98 K

|                                     | Calculated                                      | Reported                                        |
|-------------------------------------|-------------------------------------------------|-------------------------------------------------|
| Volume                              | 2852.91(13)                                     | 2852.91(13)                                     |
| Space group                         | P b c a                                         | P b c a                                         |
| Hall group                          | -P 2ac 2ab                                      | -P 2ac 2ab                                      |
| Moiety formula                      | C <sub>14</sub> H <sub>21</sub> BO <sub>4</sub> | C <sub>14</sub> H <sub>21</sub> BO <sub>4</sub> |
| Sum formula                         | C <sub>14</sub> H <sub>21</sub> BO <sub>4</sub> | C <sub>14</sub> H <sub>21</sub> BO <sub>4</sub> |
| M <sub>r</sub>                      | 264.12                                          | 264.12                                          |
| D <sub>x</sub> , g cm <sup>-3</sup> | 1.230                                           | 1.230                                           |
| Z                                   | 8                                               | 8                                               |
| Mu (mm <sup>-1</sup> )              | 0.087                                           | 0.087                                           |
| F000                                | 1136.0                                          | 1136.0                                          |
| F000'                               | 1136.59                                         |                                                 |
| h,k,l <sub>max</sub>                | 22,8,28                                         | 22,8,28                                         |
| N <sub>ref</sub>                    | 2804                                            | 2802                                            |
| T <sub>min</sub> , T <sub>max</sub> | 0.962, 0.994                                    | 0.950, 1.000                                    |
| T <sub>min</sub> '                  | 0.960                                           |                                                 |

Correction method= # Reported T Limits: T<sub>min</sub> = 0.950 T<sub>max</sub> = 1.000

AbsCorr = MULTI-SCAN

Data completeness = 0.999

Theta(max) = 25.992

R(reflections) = 0.0476(2765)

wR2(reflections) = 0.1072(2802)

S = 1.070

Npar= 178

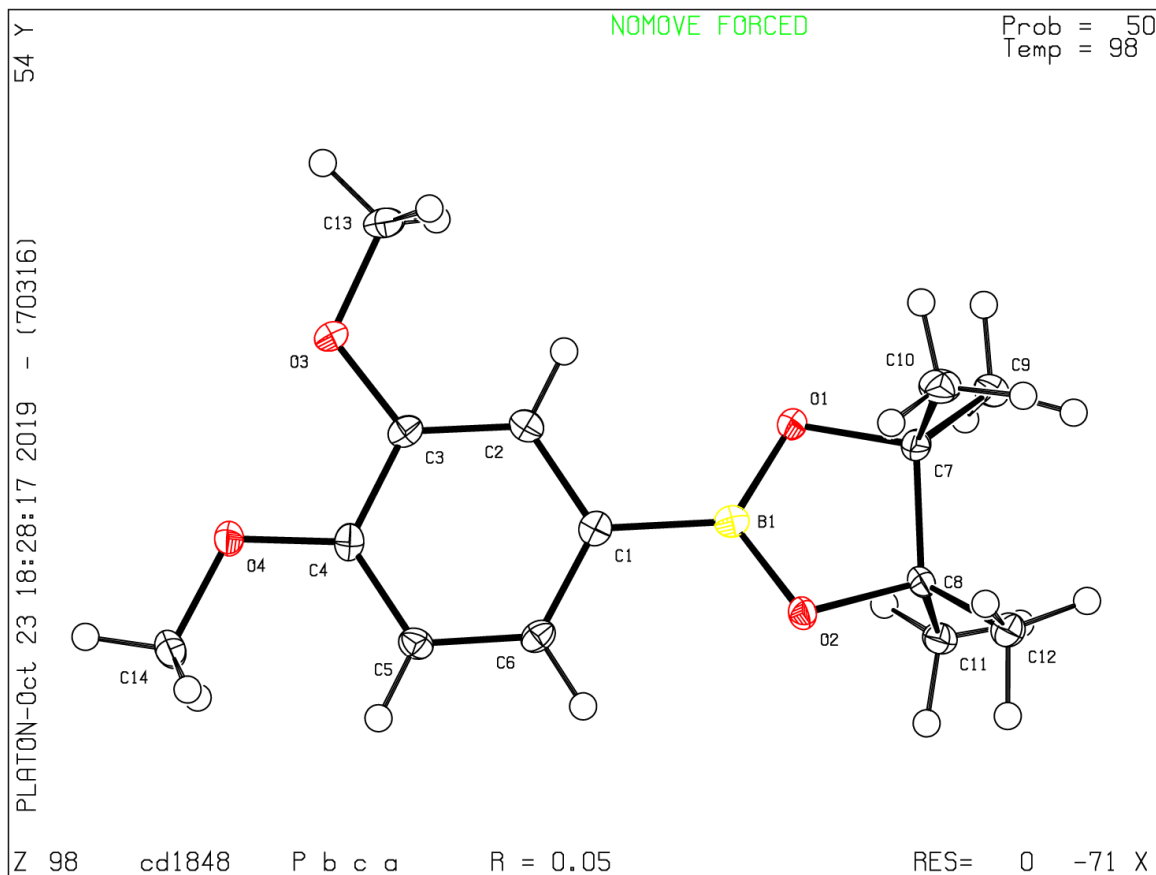

4,4,5,5-Tetramethyl-2-(4-(methylthio)phenyl)-1,3,2-dioxaborolane (60)

CCDC 1946417

Bond precision: C–C = 0.0025 Å Wavelength = 0.71073

Cell: a = 9.4792(2) b = 11.0501(2) c = 13.2369(3)

$\alpha = 90$   $\beta = 90$   $\gamma = 90$

Temperature: 98 K

|                                     | Calculated                                        | Reported                                          |
|-------------------------------------|---------------------------------------------------|---------------------------------------------------|
| Volume                              | 1386.51(5)                                        | 1386.51(5)                                        |
| Space group                         | P 21 21 21                                        | P 21 21 21                                        |
| Hall group                          | P 2ac 2ab                                         | P 2ac 2ab                                         |
| Moiety formula                      | C <sub>13</sub> H <sub>19</sub> BO <sub>2</sub> S | C <sub>13</sub> H <sub>19</sub> BO <sub>2</sub> S |
| Sum formula                         | C <sub>13</sub> H <sub>19</sub> BO <sub>2</sub> S | C <sub>13</sub> H <sub>19</sub> BO <sub>2</sub> S |
| M <sub>r</sub>                      | 250.15                                            | 250.15                                            |
| D <sub>x</sub> , g cm <sup>-3</sup> | 1.198                                             | 1.198                                             |
| Z                                   | 4                                                 | 4                                                 |
| Mu (mm <sup>-1</sup> )              | 0.221                                             | 0.221                                             |
| F000                                | 536.0                                             | 536.0                                             |
| F000'                               | 536.70                                            |                                                   |
| h,k,l <sub>max</sub>                | 11,13,16                                          | 11,13,16                                          |
| N <sub>ref</sub>                    | 2725 [1577]                                       | 2724                                              |
| T <sub>min</sub> , T <sub>max</sub> | 0.941, 0.972                                      | 0.963, 1.000                                      |
| T <sub>min</sub> '                  | 0.930                                             |                                                   |

Correction method = # Reported T Limits: T<sub>min</sub> = 0.963 T<sub>max</sub> = 1.000

AbsCorr = MULTI-SCAN

Data completeness = 1.73/1.00

Theta(max) = 25.990

R(reflections) = 0.0252(2706)

wR2(reflections) = 0.0667(2724)

S = 1.015

N<sub>par</sub> = 159

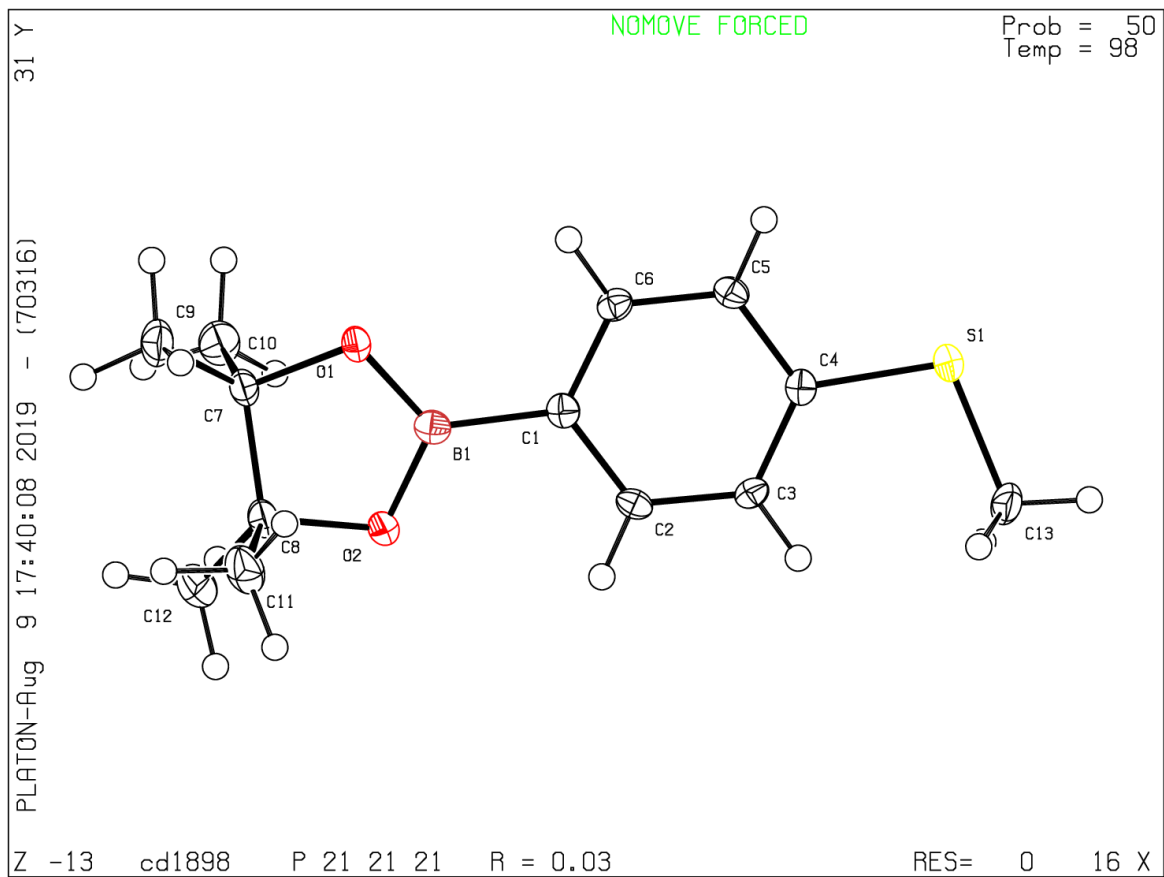

Methyl 3-(4,4,5,5-tetramethyl-1,3,2-dioxaborolan-2-yl)benzoate (65)

CCDC 1946418

---

Bond precision: C–C = 0.0030 Å Wavelength = 0.71073

Cell: a = 10.2772(4) b = 6.1873(2) c = 11.9566(5)

$\alpha = 90$   $\beta = 113.206(4)$   $\gamma = 90$

Temperature: 98 K

|                                     | Calculated                                      | Reported                                        |
|-------------------------------------|-------------------------------------------------|-------------------------------------------------|
| Volume                              | 698.79(5)                                       | 698.78(5)                                       |
| Space group                         | P 21                                            | P 1 21 1                                        |
| Hall group                          | P 2yb                                           | P 2yb                                           |
| Moiety formula                      | C <sub>14</sub> H <sub>19</sub> BO <sub>4</sub> | C <sub>14</sub> H <sub>19</sub> BO <sub>4</sub> |
| Sum formula                         | C <sub>14</sub> H <sub>19</sub> BO <sub>4</sub> | C <sub>14</sub> H <sub>19</sub> BO <sub>4</sub> |
| M <sub>r</sub>                      | 262.10                                          | 262.10                                          |
| D <sub>x</sub> , g cm <sup>-3</sup> | 1.246                                           | 1.246                                           |
| Z                                   | 2                                               | 2                                               |
| Mu (mm <sup>-1</sup> )              | 0.089                                           | 0.089                                           |
| F000                                | 280.0                                           | 280.0                                           |
| F000'                               | 280.15                                          |                                                 |
| h,k,l <sub>max</sub>                | 12,7,14                                         | 12,7,14                                         |
| N <sub>ref</sub>                    | 2746 [1507]                                     | 2744                                            |
| T <sub>min</sub> , T <sub>max</sub> | 0.971, 0.991                                    | 0.976, 1.000                                    |
| T <sub>min</sub> '                  | 0.971                                           |                                                 |

Correction method = # Reported T Limits: T<sub>min</sub> = 0.976 T<sub>max</sub> = 1.000

AbsCorr = MULTI-SCAN

Data completeness = 1.82/1.00

Theta(max) = 25.992

R(reflections) = 0.0286(2726)

wR2(reflections) = 0.0664(2744)

S = 1.006

N<sub>par</sub> = 177

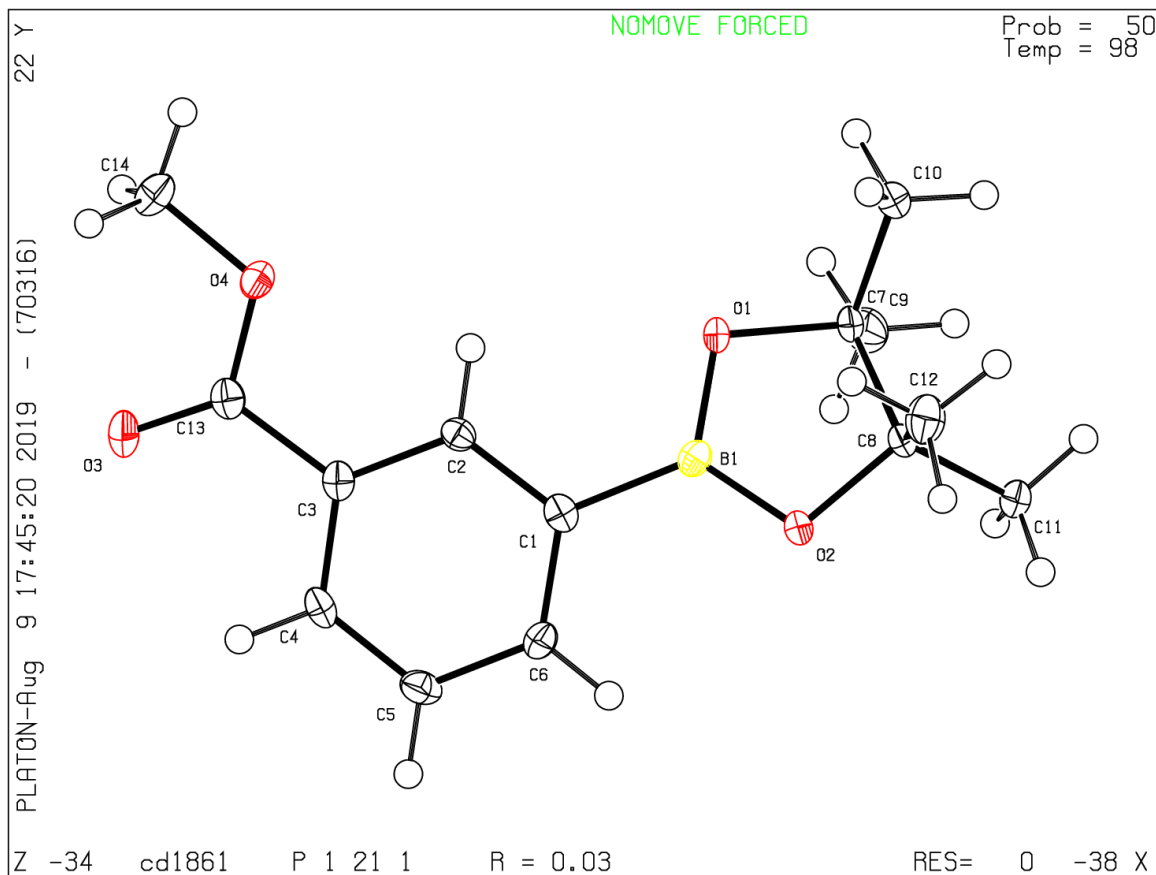

Dimethyl 4-(trifluoro-*l*-boraneyl)phthalate, potassium salt (66)

CCDC 1959500

Bond precision: C–C = 0.0034 Å Wavelength = 0.71073

Cell: a = 8.0689(2) b = 19.1049(5) c = 8.6490(2)

$\alpha = 90$   $\beta = 90$   $\gamma = 90$

Temperature: 100 K

|                                     | Calculated                                                      | Reported                                                        |
|-------------------------------------|-----------------------------------------------------------------|-----------------------------------------------------------------|
| Volume                              | 1333.29(6)                                                      | 1333.29(6)                                                      |
| Space group                         | P c a 21                                                        | P c a 21                                                        |
| Hall group                          | P 2c -2ac                                                       | P 2c -2ac                                                       |
| Moiety formula                      | C <sub>10</sub> H <sub>11</sub> BF <sub>3</sub> KO <sub>5</sub> | C <sub>10</sub> H <sub>11</sub> BF <sub>3</sub> KO <sub>5</sub> |
| Sum formula                         | C <sub>10</sub> H <sub>11</sub> BF <sub>3</sub> KO <sub>5</sub> | C <sub>10</sub> H <sub>11</sub> BF <sub>3</sub> KO <sub>5</sub> |
| M <sub>r</sub>                      | 318.10                                                          | 318.10                                                          |
| D <sub>x</sub> , g cm <sup>-3</sup> | 1.585                                                           | 1.585                                                           |
| Z                                   | 4                                                               | 4                                                               |
| Mu (mm <sup>-1</sup> )              | 0.449                                                           | 0.449                                                           |
| F <sub>000</sub>                    | 648.0                                                           | 648.0                                                           |
| F <sub>000</sub> '                  | 649.30                                                          |                                                                 |
| h,k,l <sub>max</sub>                | 9,23,10                                                         | 9,23,10                                                         |
| N <sub>ref</sub>                    | 2486 [1338]                                                     | 2404                                                            |
| T <sub>min</sub> , T <sub>max</sub> | 0.824, 0.969                                                    | 0.968, 1.000                                                    |
| T <sub>min</sub> '                  | 0.824                                                           |                                                                 |

Correction method= # Reported T Limits: T<sub>min</sub>=0.968 T<sub>max</sub>=1.000

AbsCorr = MULTI-SCAN

Data completeness= 1.80/0.97

Theta(max)= 25.500

R(reflections)= 0.0221(2393)

wR2(reflections)= 0.0593(2404)

S = 1.089

N<sub>par</sub>= 191

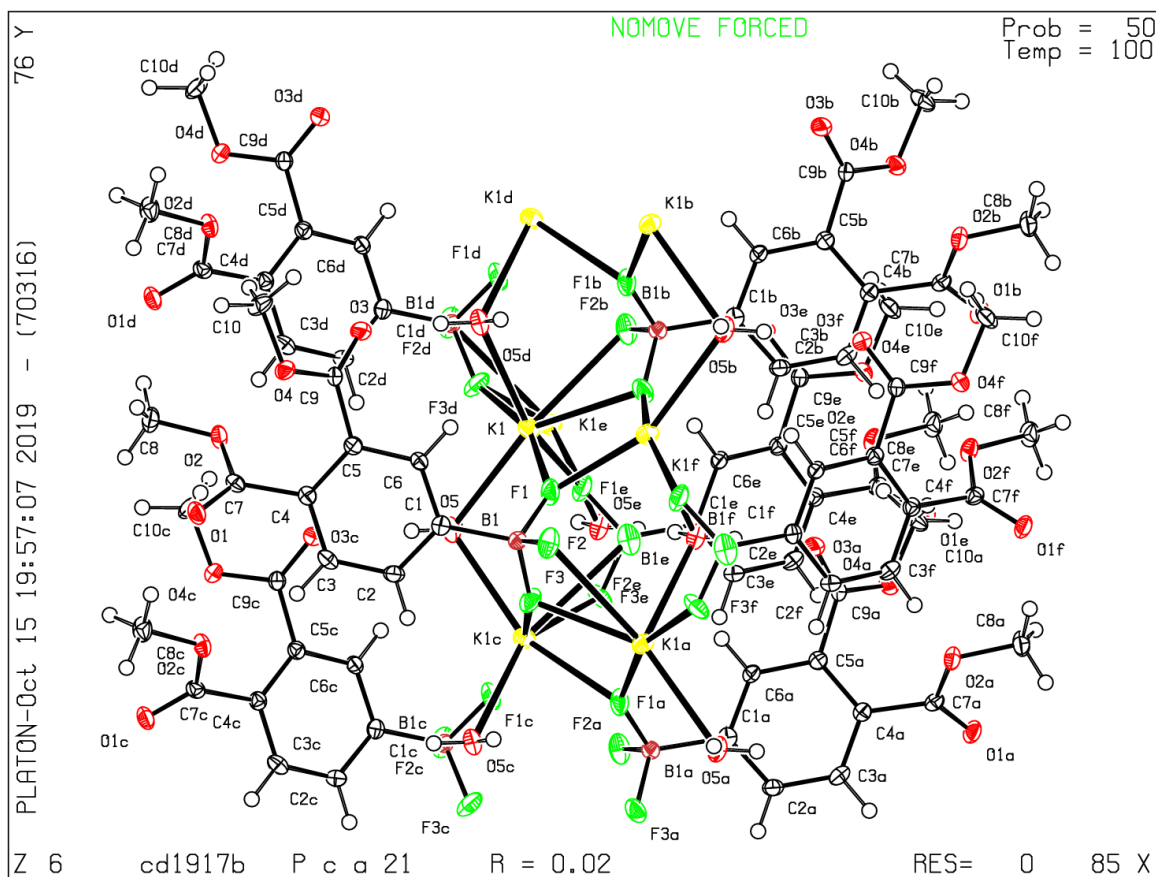



2-(6-Methoxynaphthalen-1-yl)-4,4,5,5-tetramethyl-1,3,2-dioxaborolane (73)

CCDC 1959501

---

Bond precision: C–C = 0.0031 Å Wavelength = 0.71073

Cell: a = 10.5926(2) b = 21.6904(3) c = 14.3419(2)

$\alpha = 90$   $\beta = 107.969(2)$   $\gamma = 90$

Temperature: 98 K

|                                     | Calculated                                      | Reported                                        |
|-------------------------------------|-------------------------------------------------|-------------------------------------------------|
| Volume                              | 3134.44(9)                                      | 3134.44(9)                                      |
| Space group                         | P 21/n                                          | P 1 21/n 1                                      |
| Hall group                          | -P 2yn                                          | -P 2yn                                          |
| Moiety formula                      | C <sub>17</sub> H <sub>21</sub> BO <sub>3</sub> | C <sub>17</sub> H <sub>21</sub> BO <sub>3</sub> |
| Sum formula                         | C <sub>17</sub> H <sub>21</sub> BO <sub>3</sub> | C <sub>17</sub> H <sub>21</sub> BO <sub>3</sub> |
| M <sub>r</sub>                      | 284.15                                          | 284.15                                          |
| D <sub>x</sub> , g cm <sup>-3</sup> | 1.204                                           | 1.204                                           |
| Z                                   | 8                                               | 8                                               |
| Mu (mm <sup>-1</sup> )              | 0.080                                           | 0.080                                           |
| F <sub>000</sub>                    | 1216.0                                          | 1216.0                                          |
| F <sub>000</sub> '                  | 1216.57                                         |                                                 |
| h,k,l <sub>max</sub>                | 12,25,17                                        | 12,25,17                                        |
| N <sub>ref</sub>                    | 5549                                            | 5545                                            |
| T <sub>min</sub> , T <sub>max</sub> | 0.972, 0.986                                    | 0.991, 1.000                                    |
| T <sub>min</sub> '                  | 0.969                                           |                                                 |

Correction method= # Reported T Limits: T<sub>min</sub>=0.991 T<sub>max</sub>=1.000

AbsCorr = MULTI-SCAN

Data completeness= 0.999

Theta(max)= 25.050

R(reflections)= 0.0588(5250)

wR2(reflections)= 0.1243(5545)

S = 1.069

N<sub>par</sub>= 407

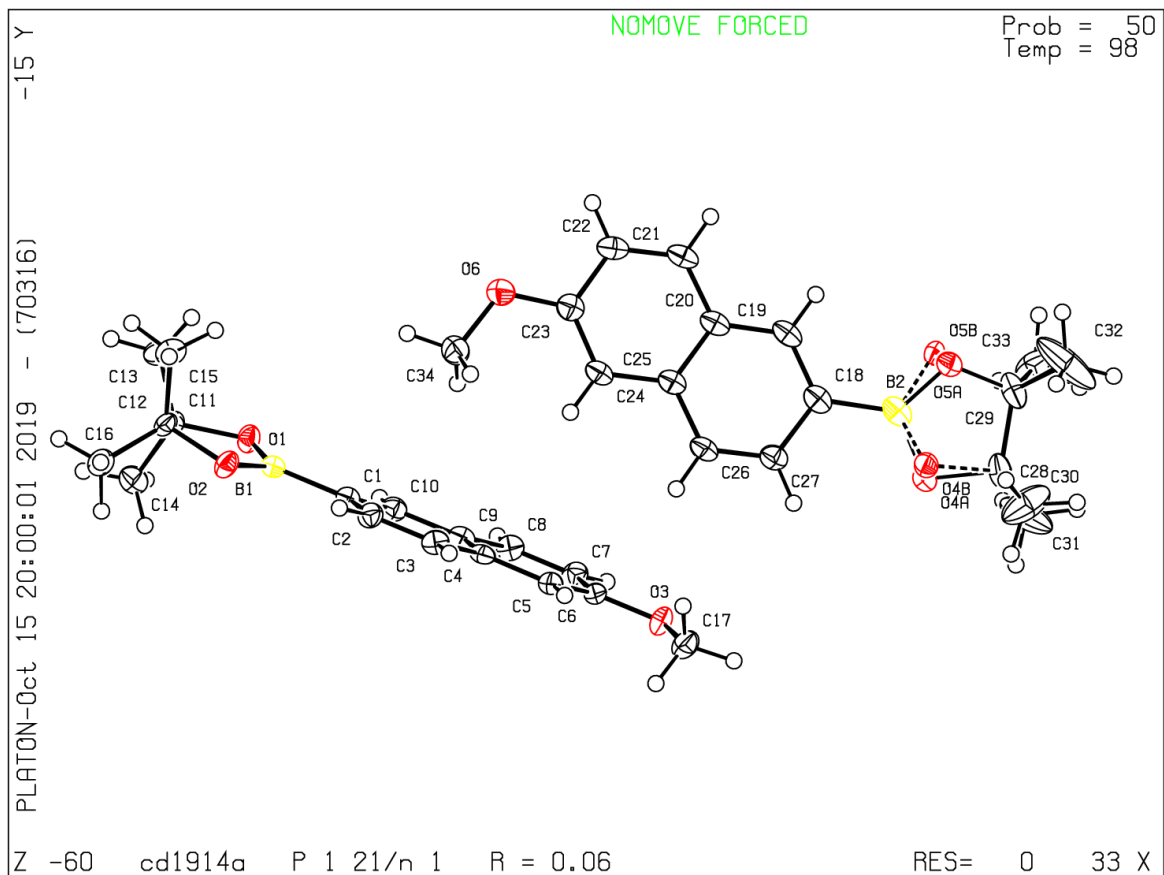

4,4,5,5-Tetramethyl-2-(phenanthren-9-yl)-1,3,2-dioxaborolane (74)

CCDC 1959505

Bond precision: C–C = 0.0056 Å Wavelength = 0.71073

Cell: a = 10.1479(2) b = 10.5387(3) c = 31.4024(7)

$\alpha = 90$   $\beta = 90$   $\gamma = 90$

Temperature: 100 K

|                                     | Calculated                                      | Reported                                        |
|-------------------------------------|-------------------------------------------------|-------------------------------------------------|
| Volume                              | 3358.35(14)                                     | 3358.35(14)                                     |
| Space group                         | P 21 21 21                                      | P 21 21 21                                      |
| Hall group                          | P 2ac 2ab                                       | P 2ac 2ab                                       |
| Moiety formula                      | C <sub>20</sub> H <sub>21</sub> BO <sub>2</sub> | C <sub>20</sub> H <sub>21</sub> BO <sub>2</sub> |
| Sum formula                         | C <sub>20</sub> H <sub>21</sub> BO <sub>2</sub> | C <sub>20</sub> H <sub>21</sub> BO <sub>2</sub> |
| M <sub>r</sub>                      | 304.18                                          | 304.18                                          |
| D <sub>x</sub> , g cm <sup>-3</sup> | 1.203                                           | 1.203                                           |
| Z                                   | 8                                               | 8                                               |
| Mu (mm <sup>-1</sup> )              | 0.075                                           | 0.075                                           |
| F <sub>000</sub>                    | 1296.0                                          | 1296.0                                          |
| F <sub>000</sub> '                  | 1296.55                                         |                                                 |
| h,k,l <sub>max</sub>                | 12,12,38                                        | 12,13,38                                        |
| N <sub>ref</sub>                    | 6584 [3725]                                     | 6582                                            |
| T <sub>min</sub> , T <sub>max</sub> | 0.976, 0.980                                    | 0.359, 1.000                                    |
| T <sub>min</sub> '                  | 0.976                                           |                                                 |

Correction method= # Reported T Limits: T<sub>min</sub>=0.359 T<sub>max</sub>=1.000

AbsCorr = MULTI-SCAN

Data completeness= 1.77/1.00

Theta(max)= 25.995

R(reflections)= 0.0644(6331)

wR2(reflections)= 0.1366(6582)

S = 1.086

N<sub>par</sub>= 423

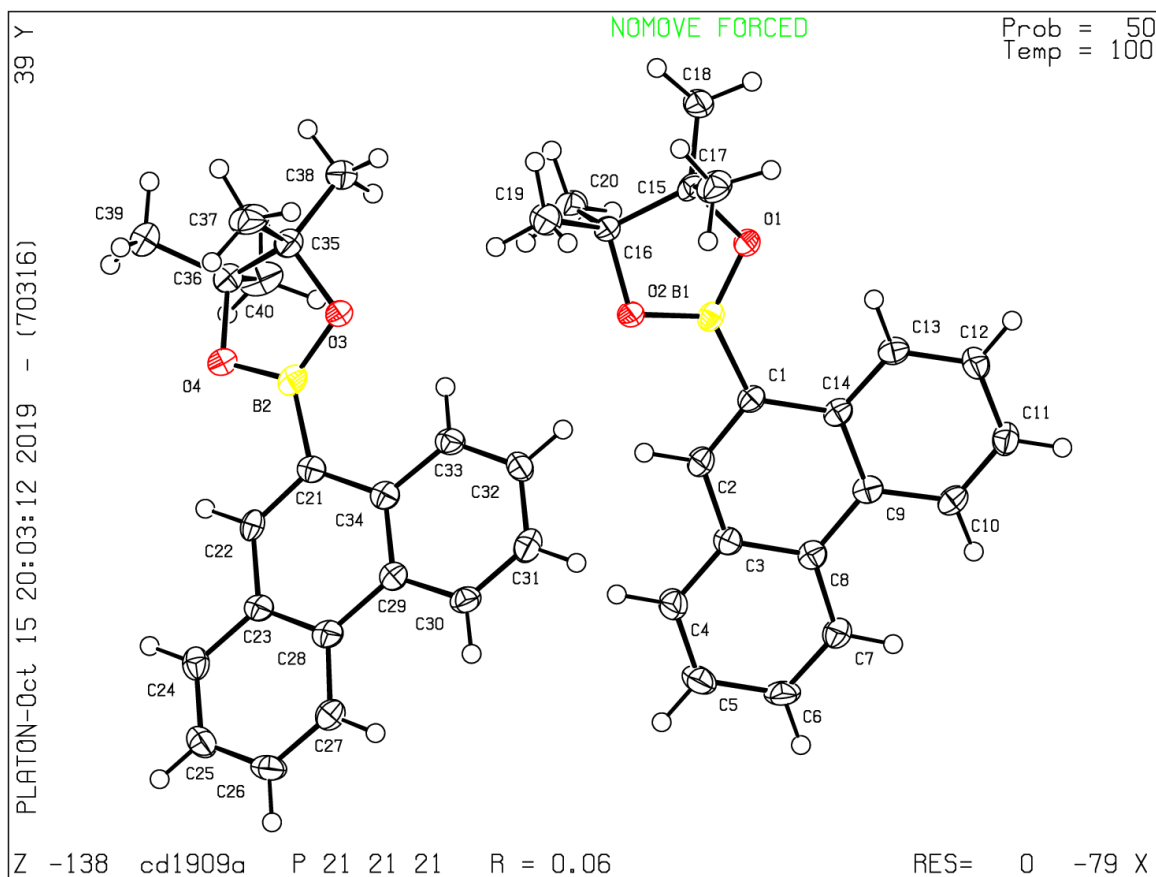

## 2-Methyl-4-(trifluoro- $\lambda^4$ -boraneyl)pyridine, potassium salt (76-H)

CCDC 1946419

---

Bond precision: C–C = 0.0017 Å Wavelength = 0.71073

Cell: a = 7.5748(2) b = 7.5235(2) c = 13.5891(4)

$\alpha = 90$   $\beta = 91.676(3)$   $\gamma = 90$

Temperature: 98 K

|                                     | Calculated                                                        | Reported                                                          |
|-------------------------------------|-------------------------------------------------------------------|-------------------------------------------------------------------|
| Volume                              | 774.10(4)                                                         | 774.10(4)                                                         |
| Space group                         | P 21/c                                                            | P 1 21/c 1                                                        |
| Hall group                          | -P 2ybc                                                           | -P 2ybc                                                           |
| Moiety formula                      | C <sub>6</sub> H <sub>7</sub> BF <sub>3</sub> N, H <sub>2</sub> O | C <sub>6</sub> H <sub>7</sub> BF <sub>3</sub> N, H <sub>2</sub> O |
| Sum formula                         | C <sub>6</sub> H <sub>9</sub> BF <sub>3</sub> NO                  | C <sub>6</sub> H <sub>9</sub> BF <sub>3</sub> NO                  |
| M <sub>r</sub>                      | 178.95                                                            | 178.95                                                            |
| D <sub>x</sub> , g cm <sup>-3</sup> | 1.536                                                             | 1.535                                                             |
| Z                                   | 4                                                                 | 4                                                                 |
| Mu (mm <sup>-1</sup> )              | 0.149                                                             | 0.149                                                             |
| F <sub>000</sub>                    | 368.0                                                             | 368.0                                                             |
| F <sub>000</sub> '                  | 368.30                                                            |                                                                   |
| h,k,l <sub>max</sub>                | 9,9,17                                                            | 9,9,17                                                            |
| N <sub>ref</sub>                    | 1605                                                              | 1606                                                              |
| T <sub>min</sub> , T <sub>max</sub> | 0.970, 0.985                                                      | 0.937, 1.000                                                      |
| T <sub>min</sub> '                  | 0.938                                                             |                                                                   |

Correction method = # Reported T Limits: T<sub>min</sub> = 0.937 T<sub>max</sub> = 1.000

AbsCorr = MULTI-SCAN

Data completeness = 1.001

Theta(max) = 26.486

R(reflections) = 0.0343(1590)

wR2(reflections) = 0.0866(1606)

S = 1.050

N<sub>par</sub> = 119

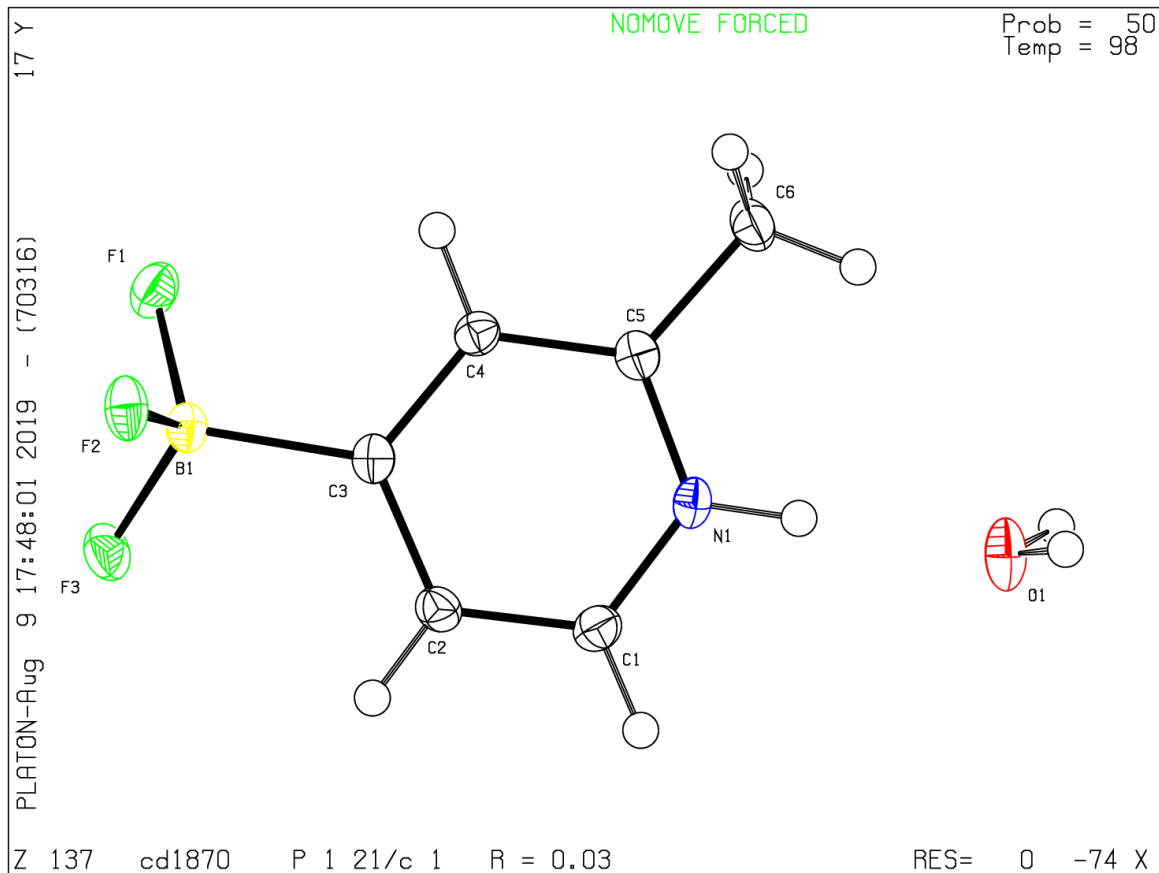

### 3-Fluoro-5-(trifluoro- $\lambda^4$ -boraneyl)pyridine, potassium salt (78)

CCDC 1946420

---

Bond precision: C–C = 0.0027 Å Wavelength = 0.71073

Cell: a = 8.5562(3) b = 13.8694(6) c = 6.9835(3)

$\alpha = 90$   $\beta = 90$   $\gamma = 90$

Temperature: 98 K

|                                     | Calculated                                        | Reported                                                                                                           |
|-------------------------------------|---------------------------------------------------|--------------------------------------------------------------------------------------------------------------------|
| Volume                              | 828.73(6)                                         | 828.73(6)                                                                                                          |
| Space group                         | P b c m                                           | P b c m                                                                                                            |
| Hall group                          | -P 2c 2b                                          | -P 2c 2b                                                                                                           |
| Moiety formula                      | C <sub>5</sub> H <sub>5</sub> BF <sub>4</sub> KNO | 0.25(C <sub>20</sub> H <sub>20</sub> B <sub>4</sub> F <sub>16</sub> K <sub>4</sub> N <sub>4</sub> O <sub>4</sub> ) |
| Sum formula                         | C <sub>5</sub> H <sub>5</sub> BF <sub>4</sub> KNO | C <sub>5</sub> H <sub>5</sub> BF <sub>4</sub> KNO                                                                  |
| M <sub>r</sub>                      | 221.01                                            | 221.01                                                                                                             |
| D <sub>x</sub> , g cm <sup>-3</sup> | 1.771                                             | 1.771                                                                                                              |
| Z                                   | 4                                                 | 4                                                                                                                  |
| Mu (mm <sup>-1</sup> )              | 0.664                                             | 0.664                                                                                                              |
| F <sub>000</sub>                    | 440.0                                             | 440.0                                                                                                              |
| F <sub>000</sub> '                  | 441.16                                            |                                                                                                                    |
| h,k,l <sub>max</sub>                | 10,16,8                                           | 10,16,8                                                                                                            |
| N <sub>ref</sub>                    | 843                                               | 843                                                                                                                |
| T <sub>min</sub> , T <sub>max</sub> | 0.833, 0.893                                      | 0.941, 1.000                                                                                                       |
| T <sub>min</sub> '                  | 0.737                                             |                                                                                                                    |

Correction method = # Reported T Limits: T<sub>min</sub> = 0.941 T<sub>max</sub> = 1.000

AbsCorr = MULTI-SCAN

Data completeness = 1.000

Theta(max) = 25.499

R(reflections) = 0.0229(843)

wR2(reflections) = 0.0634(843)

S = 1.031

N<sub>par</sub> = 78

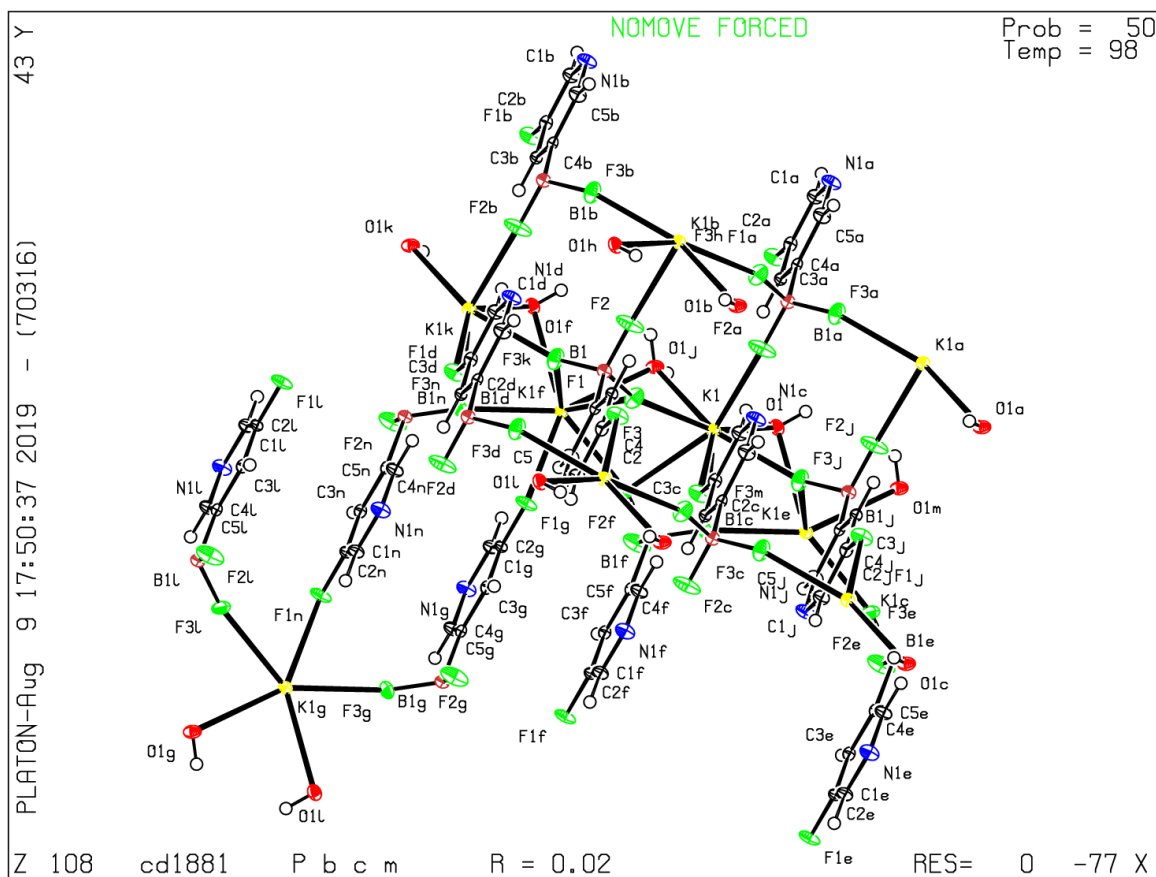



**(8R,9S,13S,14S)-13-Methyl-17-oxo-7,8,9,11,12,13,14,15,16,17-decahydro-6H-cyclopenta[*a*]phenanthren-3-yl 4-(4,4,5,5-tetramethyl-1,3,2-dioxaborolan-2-yl)benzoate (110)**

**CCDC 1946421**

---

Bond precision:            C–C = 0.0045 Å                            Wavelength = 0.71073

Cell:                    a = 9.4219(3)      b = 11.3625(3)    c = 16.4678(4)

$\alpha$  = 104.315(2)     $\beta$  = 92.465(2)     $\gamma$  = 114.483(3)

Temperature: 98 K

|                                     | Calculated                                                          | Reported                                                            |
|-------------------------------------|---------------------------------------------------------------------|---------------------------------------------------------------------|
| Volume                              | 1533.35(9)                                                          | 1533.34(8)                                                          |
| Space group                         | P 1                                                                 | P 1                                                                 |
| Hall group                          | P 1                                                                 | P 1                                                                 |
| Moiety formula                      | C <sub>31</sub> H <sub>37</sub> BO <sub>5</sub> , CHCl <sub>3</sub> | C <sub>31</sub> H <sub>37</sub> BO <sub>5</sub> , CHCl <sub>3</sub> |
| Sum formula                         | C <sub>32</sub> H <sub>38</sub> BCl <sub>3</sub> O <sub>5</sub>     | C <sub>32</sub> H <sub>38</sub> BCl <sub>3</sub> O <sub>5</sub>     |
| M <sub>r</sub>                      | 619.78                                                              | 619.78                                                              |
| D <sub>x</sub> , g cm <sup>-3</sup> | 1.342                                                               | 1.342                                                               |
| Z                                   | 2                                                                   | 2                                                                   |
| Mu (mm <sup>-1</sup> )              | 0.338                                                               | 0.338                                                               |
| F <sub>000</sub>                    | 652.0                                                               | 652.0                                                               |
| F <sub>000</sub> '                  | 653.15                                                              |                                                                     |
| h,k,l <sub>max</sub>                | 11,14,20                                                            | 11,14,20                                                            |
| N <sub>ref</sub>                    | 12052 [6026]                                                        | 11851                                                               |
| T <sub>min</sub> , T <sub>max</sub> | 0.875, 0.977                                                        | 0.981, 1.000                                                        |
| T <sub>min</sub> '                  | 0.865                                                               |                                                                     |

Correction method = # Reported T Limits:  $T_{\min} = 0.981$   $T_{\max} = 1.000$

AbsCorr = MULTI-SCAN

Data completeness = 1.97/0.98      Theta(max) = 25.999

R(reflections) = 0.0342(11638)      wR2(reflections) = 0.0861(11851)

S = 1.023       $N_{\text{par}} = 749$

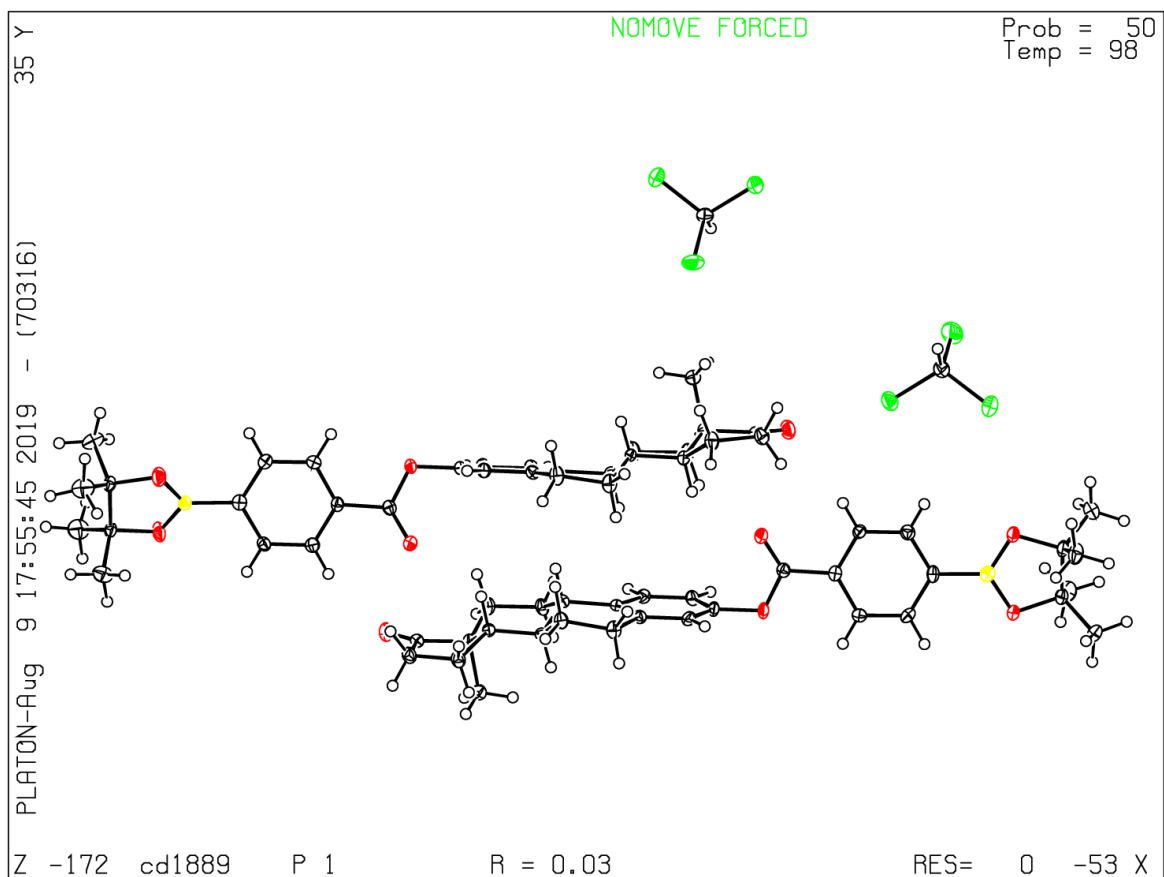

**Bis(4-(4,4,5,5-tetramethyl-1,3,2-dioxaborolan-2-yl)phenyl)methane (112)**

**CCDC 1959506**

---

Bond precision: C–C = 0.0030 Å Wavelength = 0.71073

Cell: a = 17.2944(14) b = 6.5162(4) c = 11.3970(8)

$\alpha = 90$   $\beta = 106.818(8)$   $\gamma = 90$

Temperature: 100 K

|                                     | Calculated                                                    | Reported                                                      |
|-------------------------------------|---------------------------------------------------------------|---------------------------------------------------------------|
| Volume                              | 1229.44(16)                                                   | 1229.44(16)                                                   |
| Space group                         | P 21/c                                                        | P 1 21/c 1                                                    |
| Hall group                          | -P 2ybc                                                       | -P 2ybc                                                       |
| Moiety formula                      | C <sub>26</sub> H <sub>36</sub> B <sub>2</sub> O <sub>4</sub> | C <sub>26</sub> H <sub>36</sub> B <sub>2</sub> O <sub>4</sub> |
| Sum formula                         | C <sub>26</sub> H <sub>36</sub> B <sub>2</sub> O <sub>4</sub> | C <sub>26</sub> H <sub>36</sub> B <sub>2</sub> O <sub>4</sub> |
| M <sub>r</sub>                      | 434.17                                                        | 434.17                                                        |
| D <sub>x</sub> , g cm <sup>-3</sup> | 1.173                                                         | 1.173                                                         |
| Z                                   | 2                                                             | 2                                                             |
| Mu (mm <sup>-1</sup> )              | 0.076                                                         | 0.076                                                         |
| F <sub>000</sub>                    | 468.0                                                         | 468.0                                                         |
| F <sub>000</sub> '                  | 468.21                                                        |                                                               |
| h,k,l <sub>max</sub>                | 21,8,14                                                       | 21,8,14                                                       |
| N <sub>ref</sub>                    | 2405                                                          | 3644                                                          |
| T <sub>min</sub> , T <sub>max</sub> | 0.979, 0.996                                                  | 0.889, 1.000                                                  |
| T <sub>min</sub> '                  | 0.977                                                         |                                                               |

Correction method= # Reported T Limits: T<sub>min</sub>=0.889 T<sub>max</sub>=1.000

AbsCorr = MULTI-SCAN

Data completeness= 1.515

Theta(max)= 25.999

R(reflections)= 0.0411(2595)

wR2(reflections)= 0.0757(3644)

S = 1.038

N<sub>par</sub>= 149

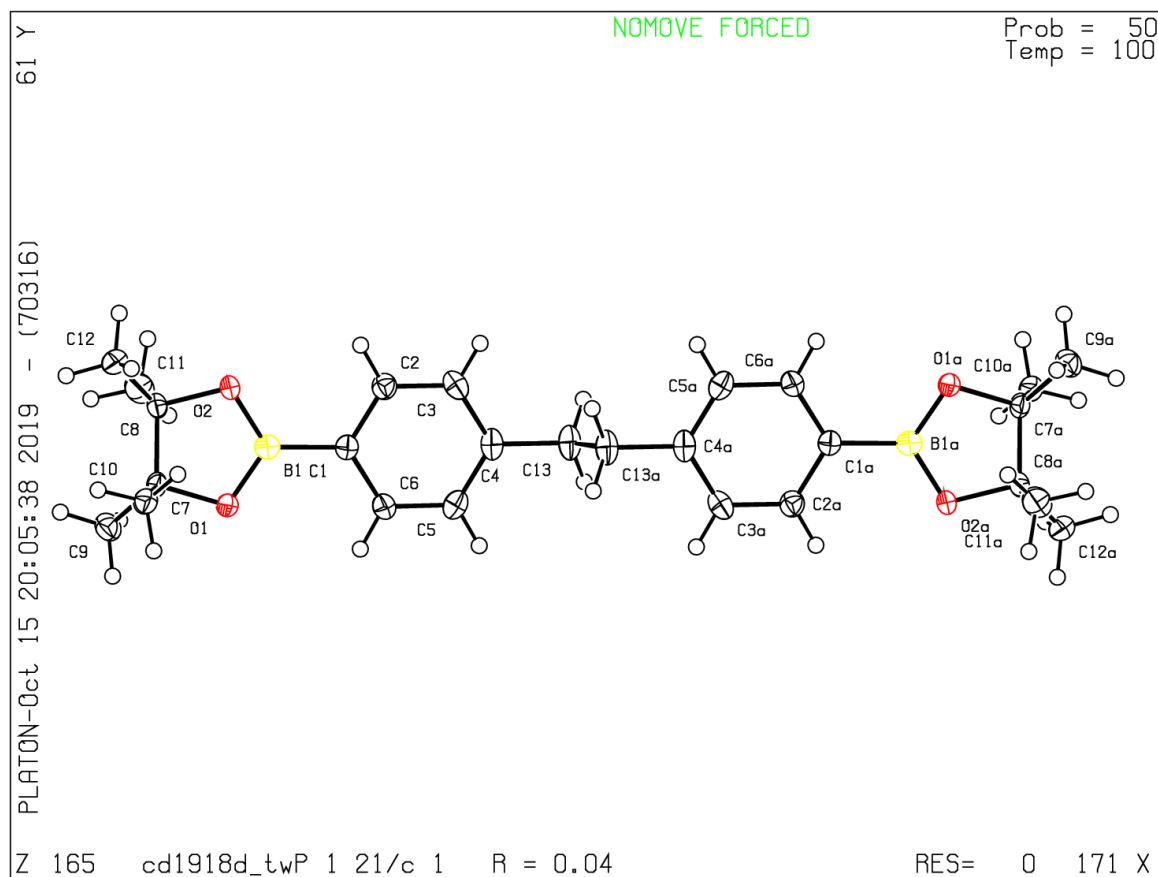

**Bis(4-(4,4,5,5-tetramethyl-1,3,2-dioxaborolan-2-yl)phenyl)methane (113)**

**CCDC 1946422**

---

Bond precision: C–C = 0.0030 Å Wavelength = 0.71073

Cell: a = 25.3806(6) b = 6.6166(1) c = 31.0990(8)

$\alpha = 90$   $\beta = 112.921(3)$   $\gamma = 90$

Temperature: 98 K

|                                     | Calculated                                                    | Reported                                                      |
|-------------------------------------|---------------------------------------------------------------|---------------------------------------------------------------|
| Volume                              | 4810.2(2)                                                     | 4810.2(2)                                                     |
| Space group                         | I 2/a                                                         | I 1 2/a 1                                                     |
| Hall group                          | -I 2ya                                                        | -I 2ya                                                        |
| Moiety formula                      | C <sub>25</sub> H <sub>34</sub> B <sub>2</sub> O <sub>4</sub> | C <sub>25</sub> H <sub>34</sub> B <sub>2</sub> O <sub>4</sub> |
| Sum formula                         | C <sub>25</sub> H <sub>34</sub> B <sub>2</sub> O <sub>4</sub> | C <sub>25</sub> H <sub>34</sub> B <sub>2</sub> O <sub>4</sub> |
| M <sub>r</sub>                      | 420.14                                                        | 420.14                                                        |
| D <sub>x</sub> , g cm <sup>-3</sup> | 1.160                                                         | 1.160                                                         |
| Z                                   | 8                                                             | 8                                                             |
| Mu (mm <sup>-1</sup> )              | 0.075                                                         | 0.075                                                         |
| F <sub>000</sub>                    | 1808.0                                                        | 1808.0                                                        |
| F <sub>000</sub> '                  | 1808.80                                                       |                                                               |
| h,k,l <sub>max</sub>                | 30,7,37                                                       | 30,7,37                                                       |
| N <sub>ref</sub>                    | 4253                                                          | 4247                                                          |
| T <sub>min</sub> , T <sub>max</sub> | 0.976, 0.987                                                  | 0.993, 1.000                                                  |
| T <sub>min</sub> '                  | 0.976                                                         |                                                               |

Correction method = # Reported T Limits: T<sub>min</sub> = 0.993 T<sub>max</sub> = 1.000

AbsCorr = MULTI-SCAN

Data completeness = 0.999

Theta(max) = 25.049

R(reflections) = 0.0547(4137)

wR2(reflections) = 0.1200(4247)

S = 1.072

N<sub>par</sub> = 316

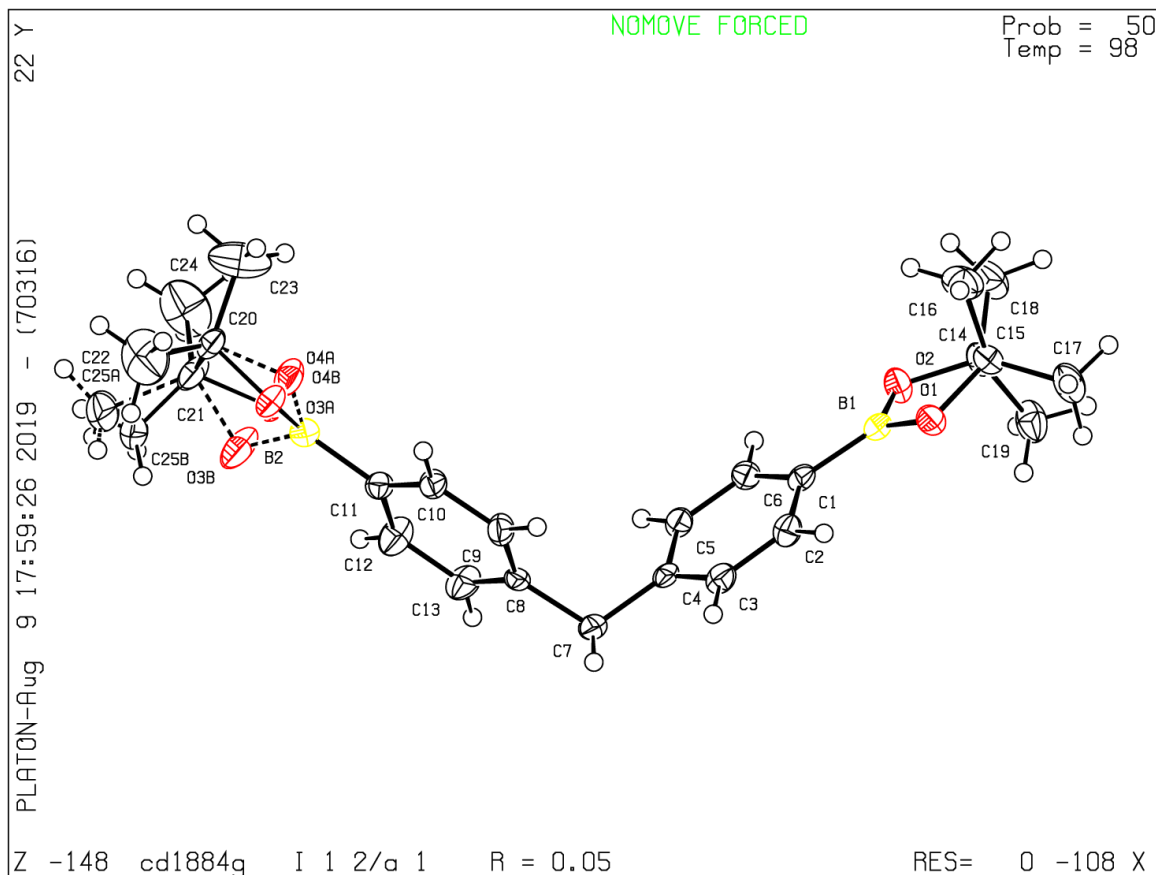

**Ethyl 4-(5,5-dimethyl-1,3,2-dioxaborinan-2-yl)benzoate (114)**

**CCDC 1946423**

Bond precision:            C–C = 0.0018 Å                            Wavelength = 0.71073

Cell:                    a = 5.8375(2)        b = 17.0381(4)    c = 13.9958(4)

                          α = 90                    β = 94.048(2)    γ = 90

Temperature: 98 K

|                                     | Calculated                                      | Reported                                        |
|-------------------------------------|-------------------------------------------------|-------------------------------------------------|
| Volume                              | 1388.55(7)                                      | 1388.55(7)                                      |
| Space group                         | P 21/c                                          | P 1 21/c 1                                      |
| Hall group                          | -P 2ybc                                         | -P 2ybc                                         |
| Moiety formula                      | C <sub>14</sub> H <sub>19</sub> BO <sub>4</sub> | C <sub>14</sub> H <sub>19</sub> BO <sub>4</sub> |
| Sum formula                         | C <sub>14</sub> H <sub>19</sub> BO <sub>4</sub> | C <sub>14</sub> H <sub>19</sub> BO <sub>4</sub> |
| M <sub>r</sub>                      | 262.10                                          | 262.10                                          |
| D <sub>x</sub> , g cm <sup>-3</sup> | 1.254                                           | 1.254                                           |
| Z                                   | 4                                               | 4                                               |
| Mu (mm <sup>-1</sup> )              | 0.089                                           | 0.089                                           |
| F000                                | 560.0                                           | 560.0                                           |
| F000'                               | 560.30                                          |                                                 |
| h,k,l <sub>max</sub>                | 7,21,17                                         | 7,21,17                                         |
| N <sub>ref</sub>                    | 2731                                            | 2731                                            |
| T <sub>min</sub> , T <sub>max</sub> | 0.984, 0.991                                    | 0.958, 1.000                                    |
| T <sub>min</sub> '                  | 0.974                                           |                                                 |

Correction method = # Reported T Limits: T<sub>min</sub> = 0.958 T<sub>max</sub> = 1.000

AbsCorr = MULTI-SCAN

Data completeness = 1.000

Theta(max) = 26.000

R(reflections) = 0.0427(2696)

wR2(reflections) = 0.1055(2731)

S = 1.019

N<sub>par</sub> = 175

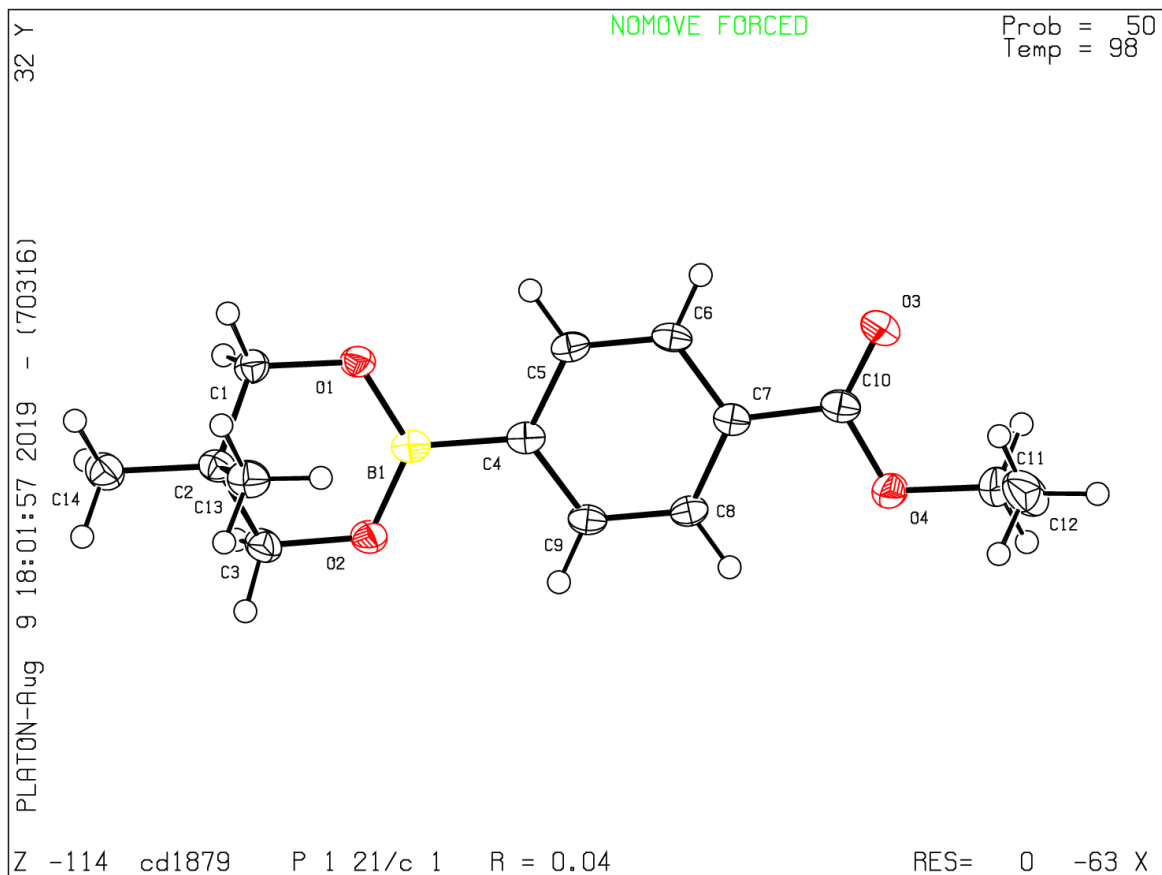



NMR Spectroscopic data  
Diethyl (4-(2-(4-methoxyphenyl)propan-2-yl)phenyl) phosphate (S1)

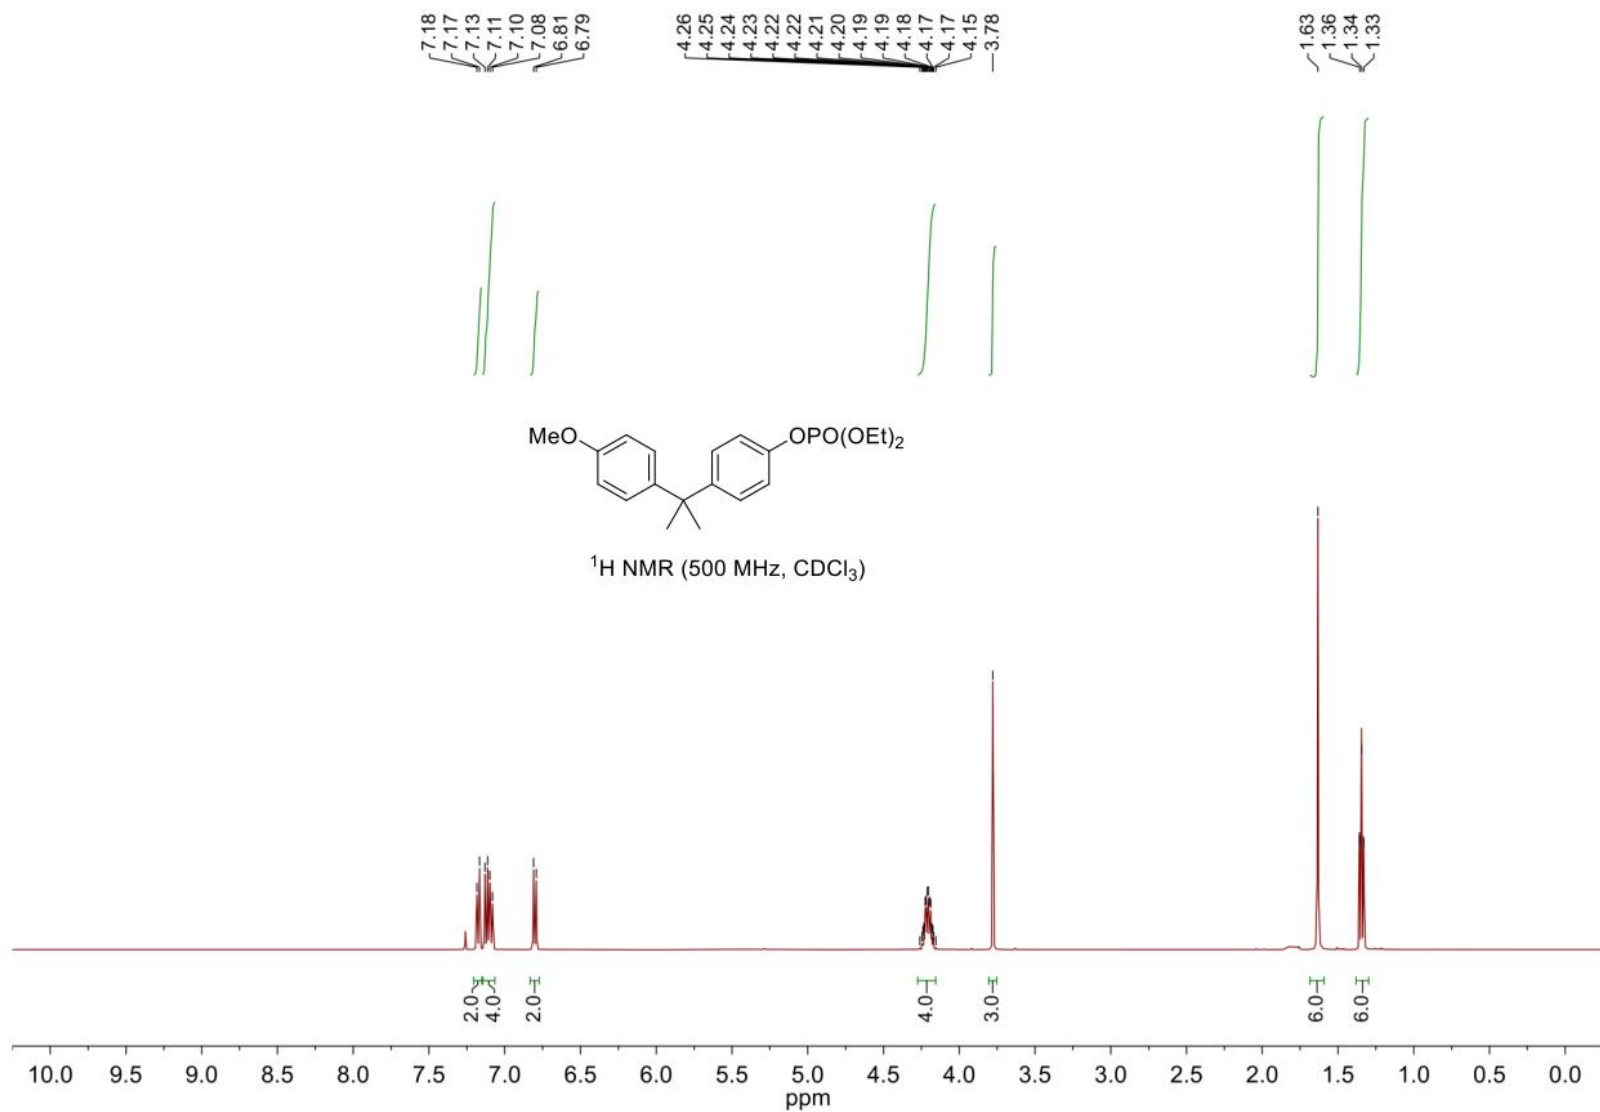

# Diethyl (4-(2-(4-methoxyphenyl)propan-2-yl)phenyl) phosphate (S1)

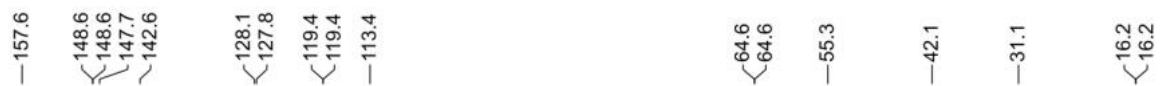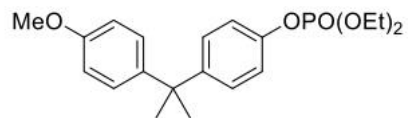

$^{13}\text{C}$  NMR (125 MHz,  $\text{CDCl}_3$ )

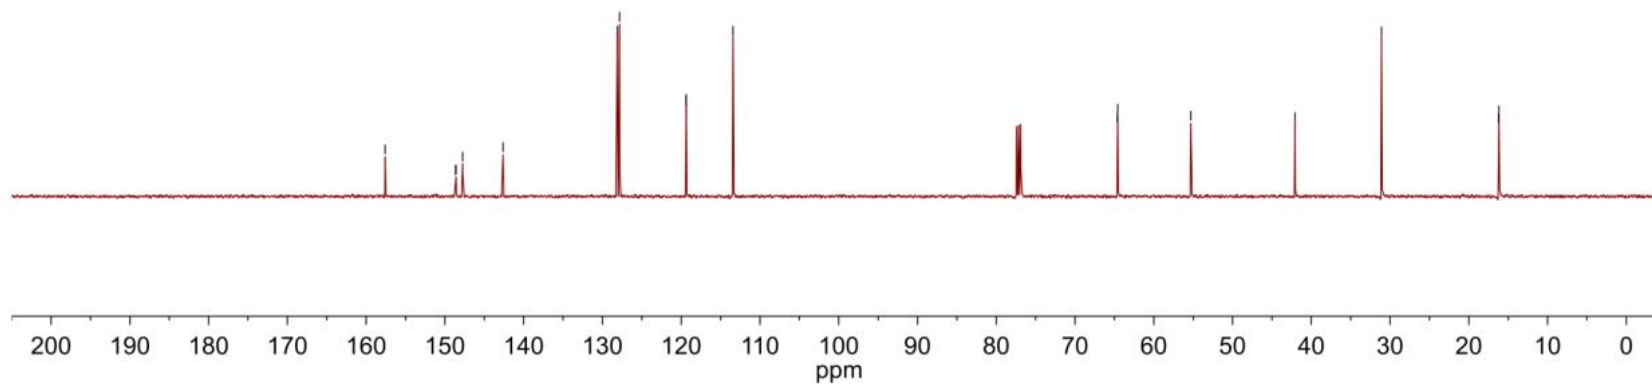

# Diethyl (3-fluoro-4-methylphenyl) phosphate (S2)

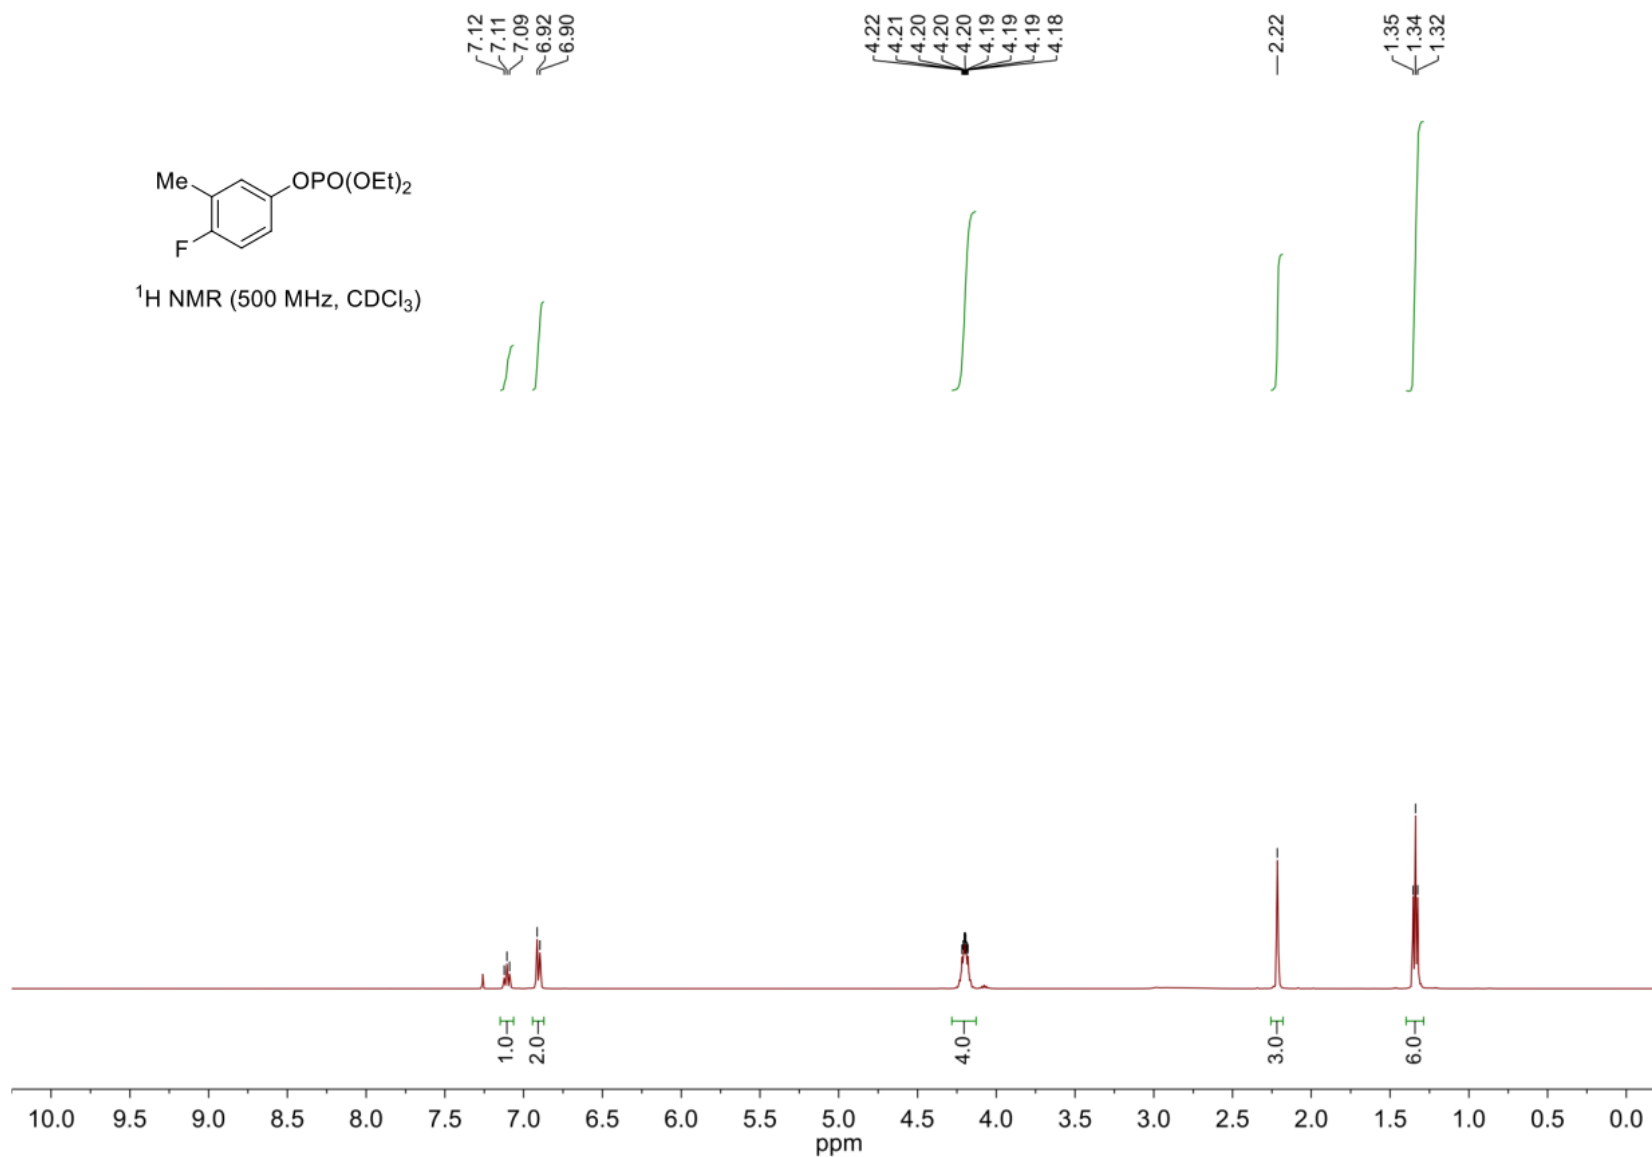

# Diethyl (3-fluoro-4-methylphenyl) phosphate (S2)

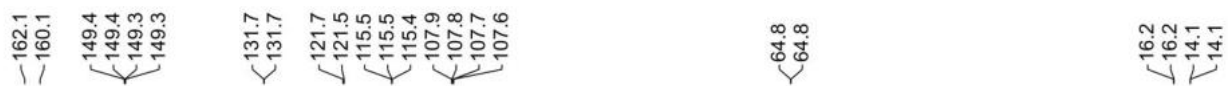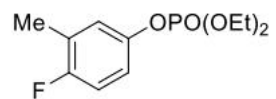

$^{13}\text{C}$  NMR (125 MHz,  $\text{CDCl}_3$ )

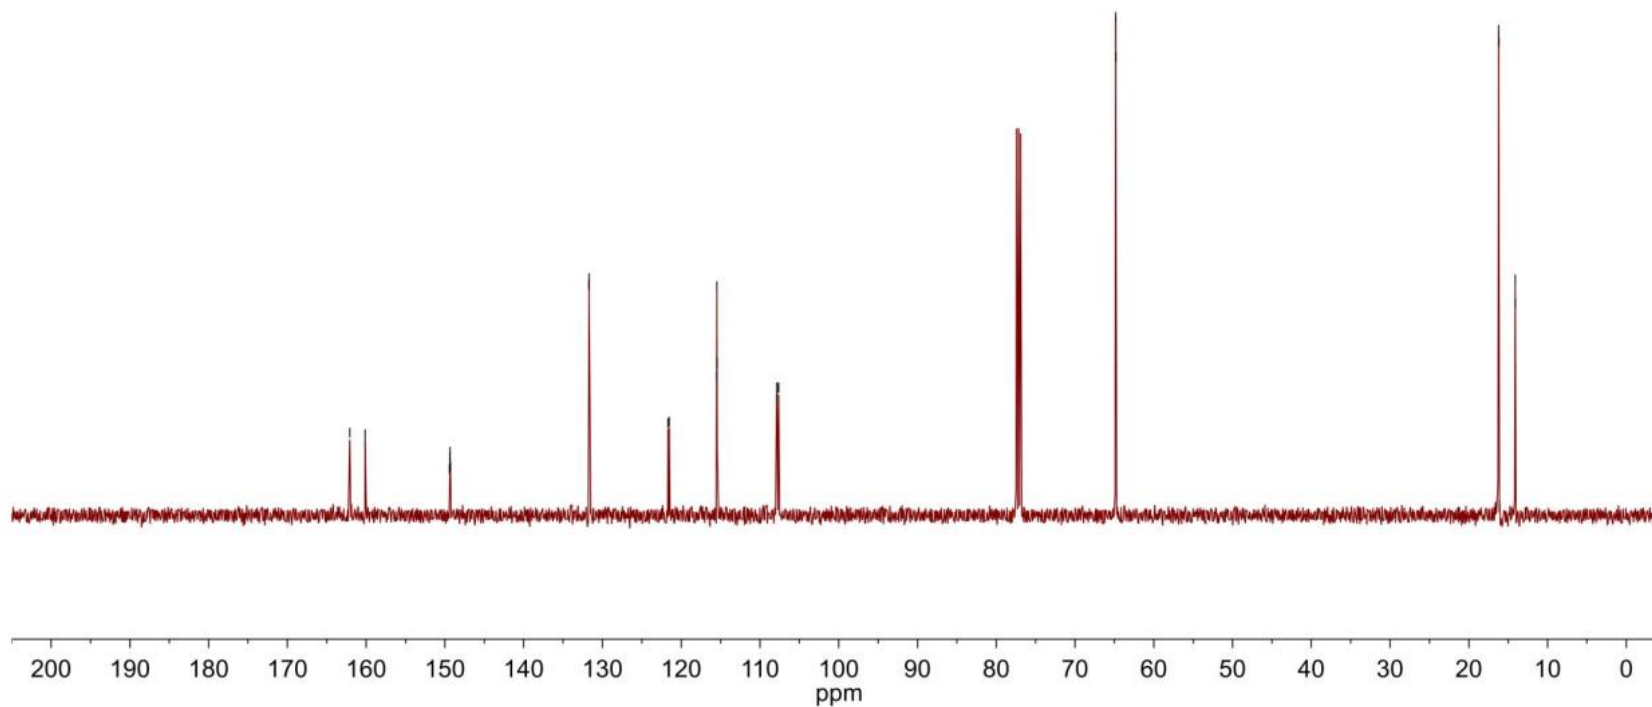

S220

*tert*-Butyl (4-((diethoxyphosphoryl)oxy)phenyl)carbamate (S122)

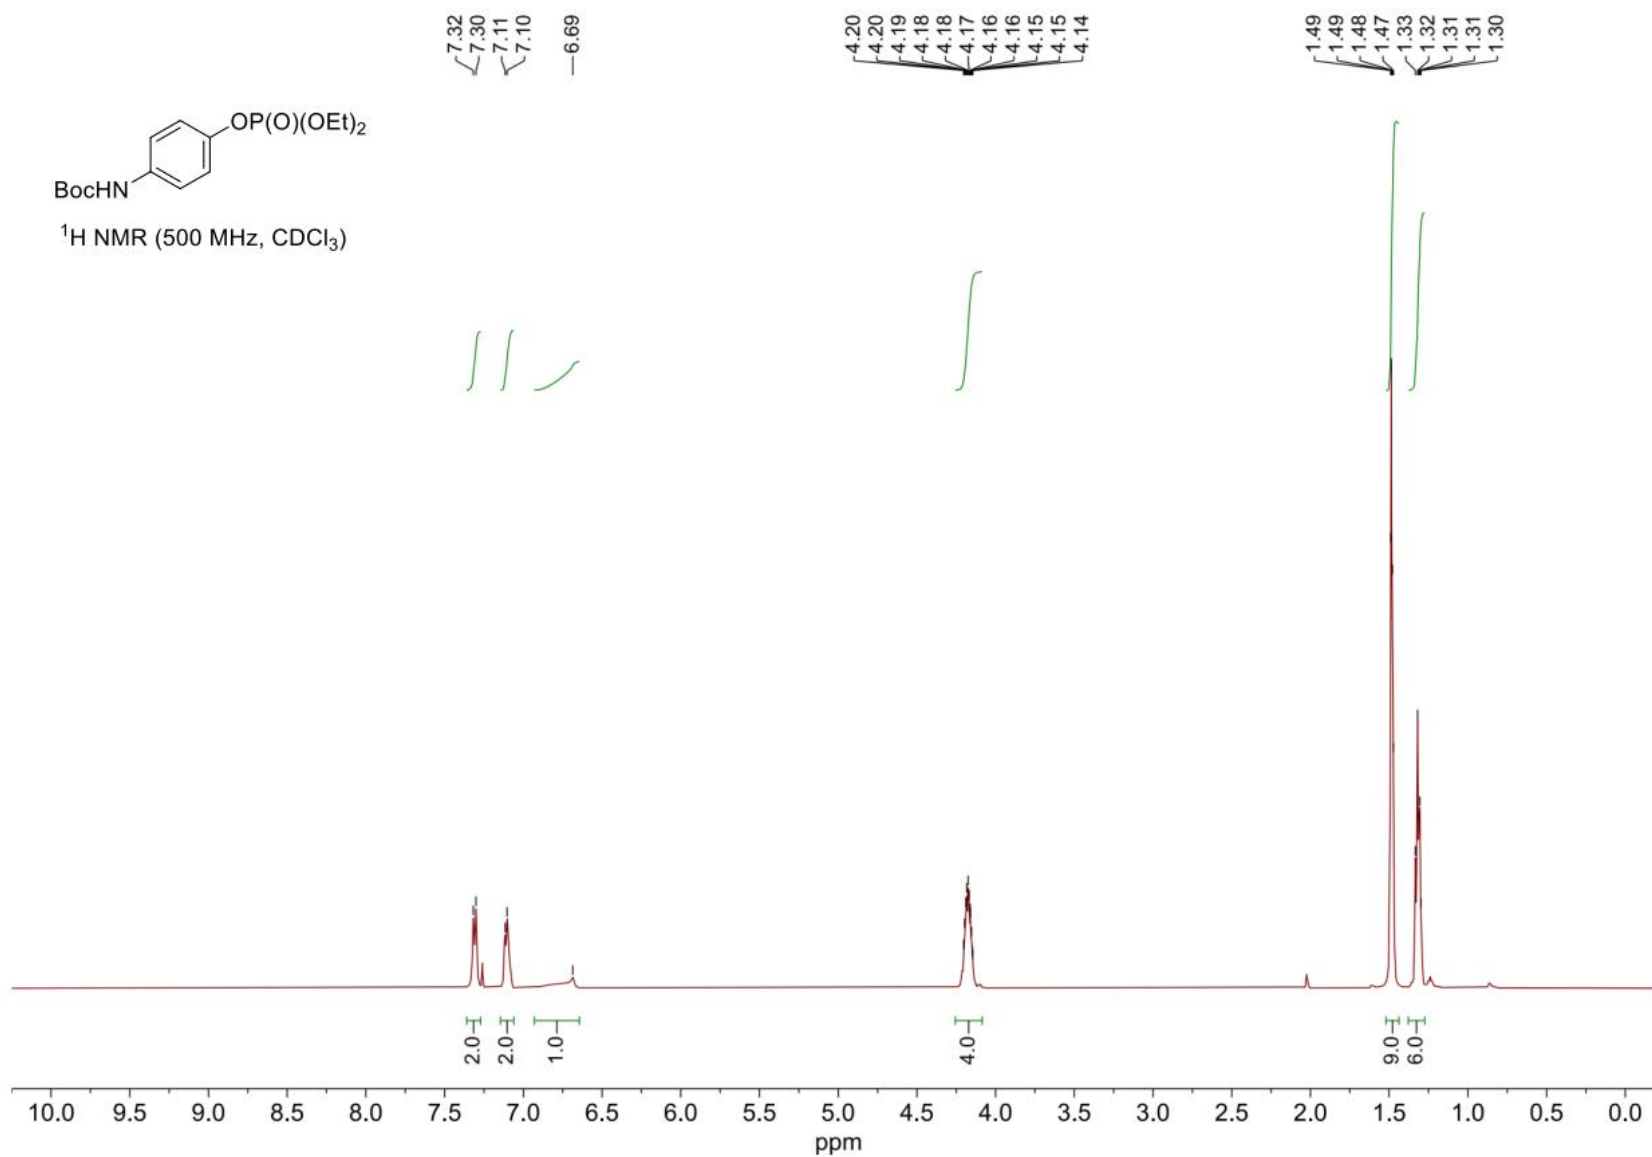

S221

*tert*-Butyl (4-((diethoxyphosphoryl)oxy)phenyl)carbamate (S122)

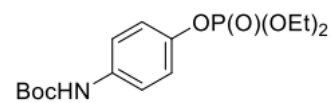

<sup>13</sup>C NMR (125 MHz, CDCl<sub>3</sub>)

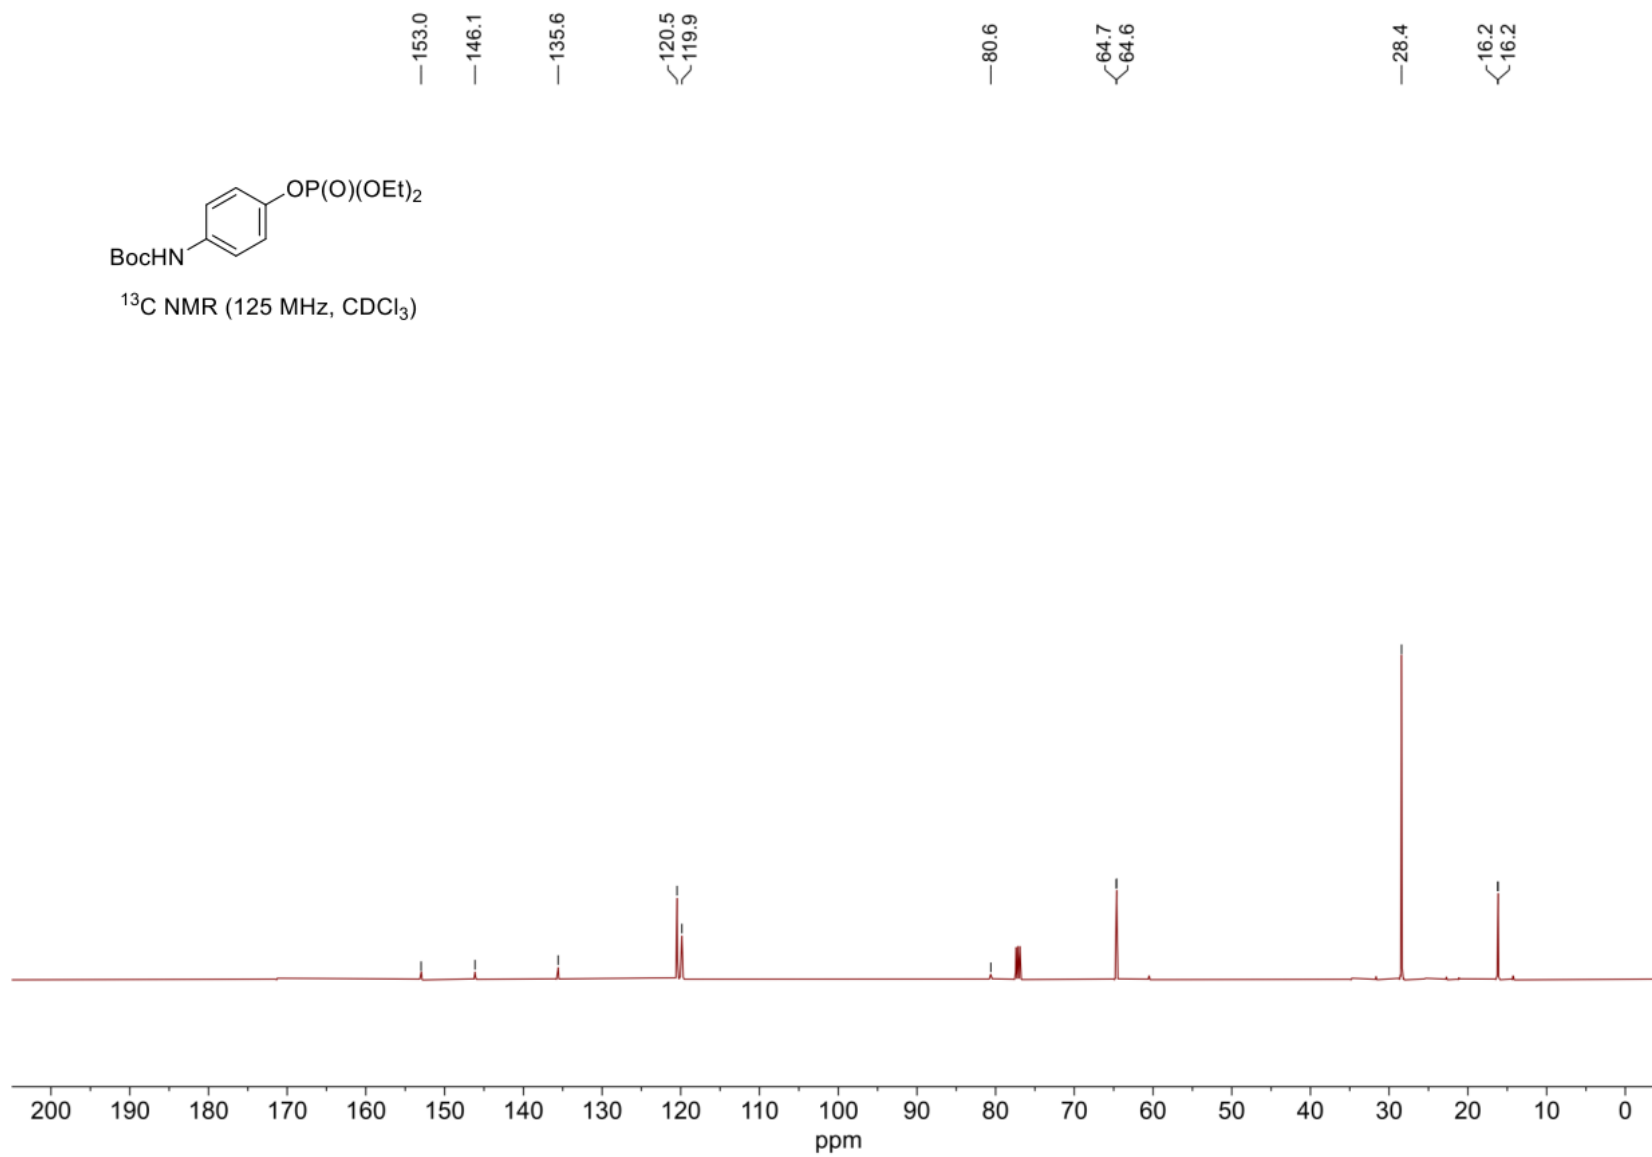

S222

# Diethyl (4-(4,4,5,5-tetramethyl-1,3,2-dioxaborolan-2-yl)phenyl) phosphate (S3)

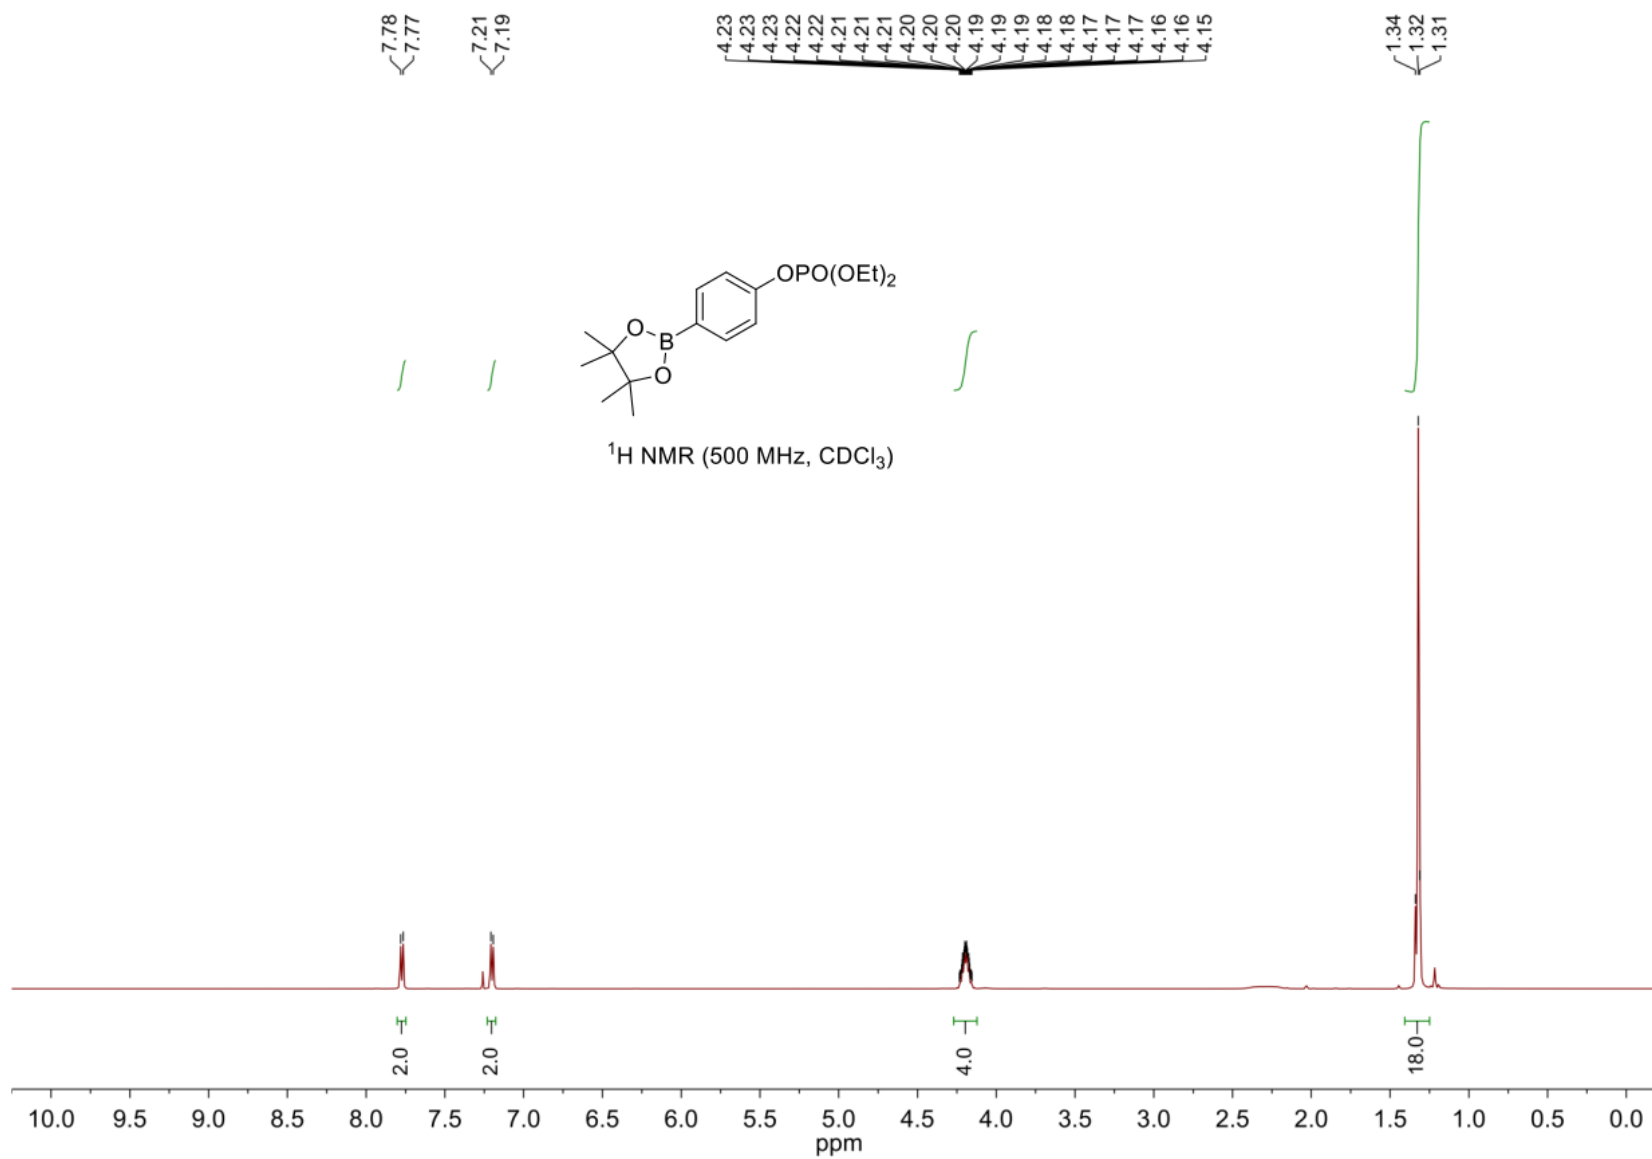

S223

# Diethyl (4-(4,4,5,5-tetramethyl-1,3,2-dioxaborolan-2-yl)phenyl) phosphate (S3)

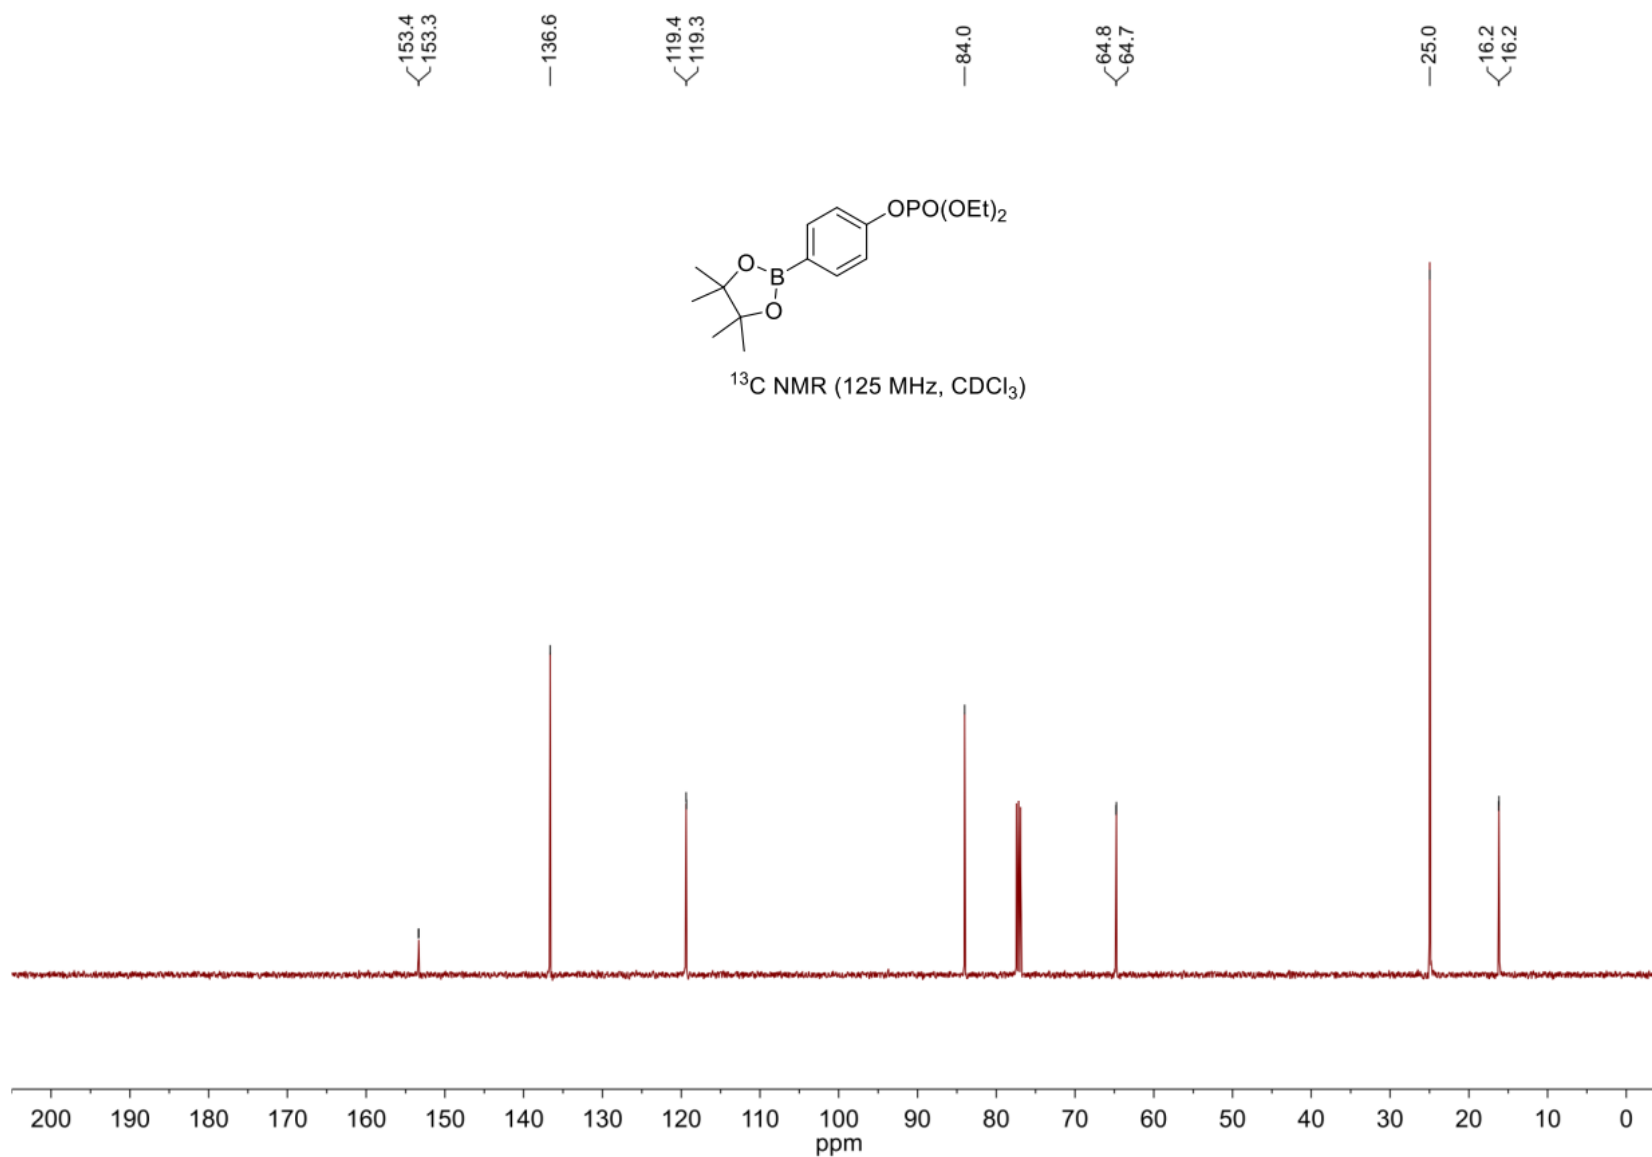

S224



# Methyl 2-(3-((diethoxyphosphoryl)oxy)phenyl)acetate (S4)

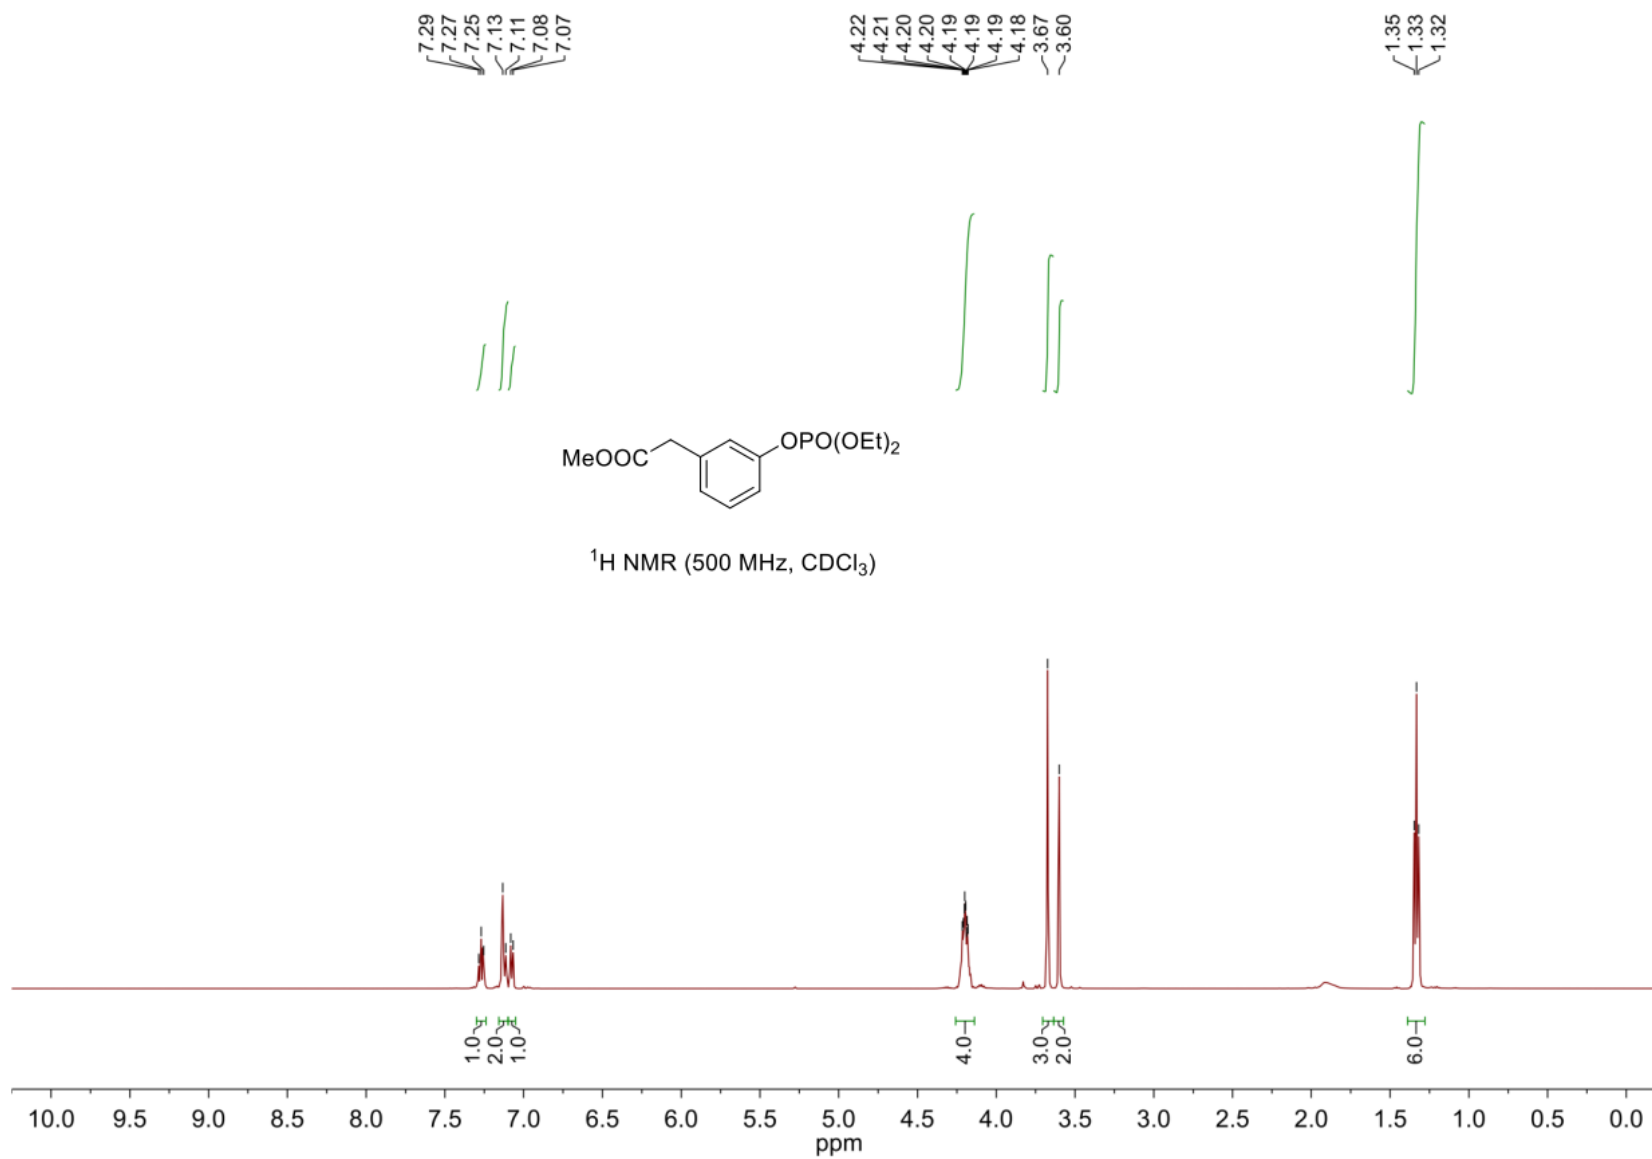

# Methyl 2-(3-((diethoxyphosphoryl)oxy)phenyl)acetate (S4)

—171.6  
150.9  
150.9  
—135.9  
129.8  
126.0  
121.1  
121.0  
118.8  
118.8  
64.8  
64.7  
—52.2  
—40.9  
16.2  
16.1

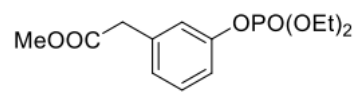

<sup>13</sup>C NMR (125 MHz, CDCl<sub>3</sub>)

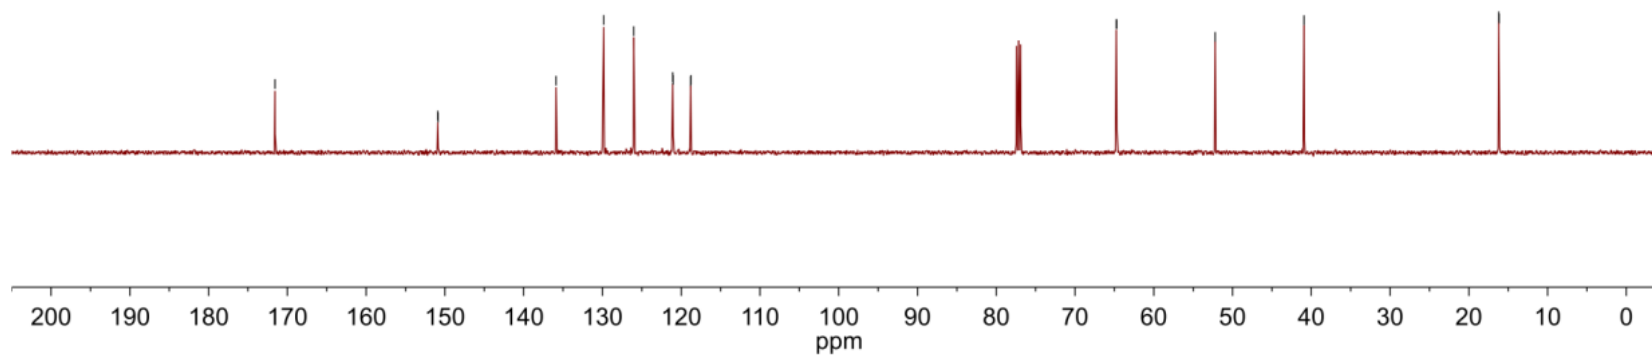

# Methyl 3-(2-((diethoxyphosphoryl)oxy)phenyl)propanoate (S5)

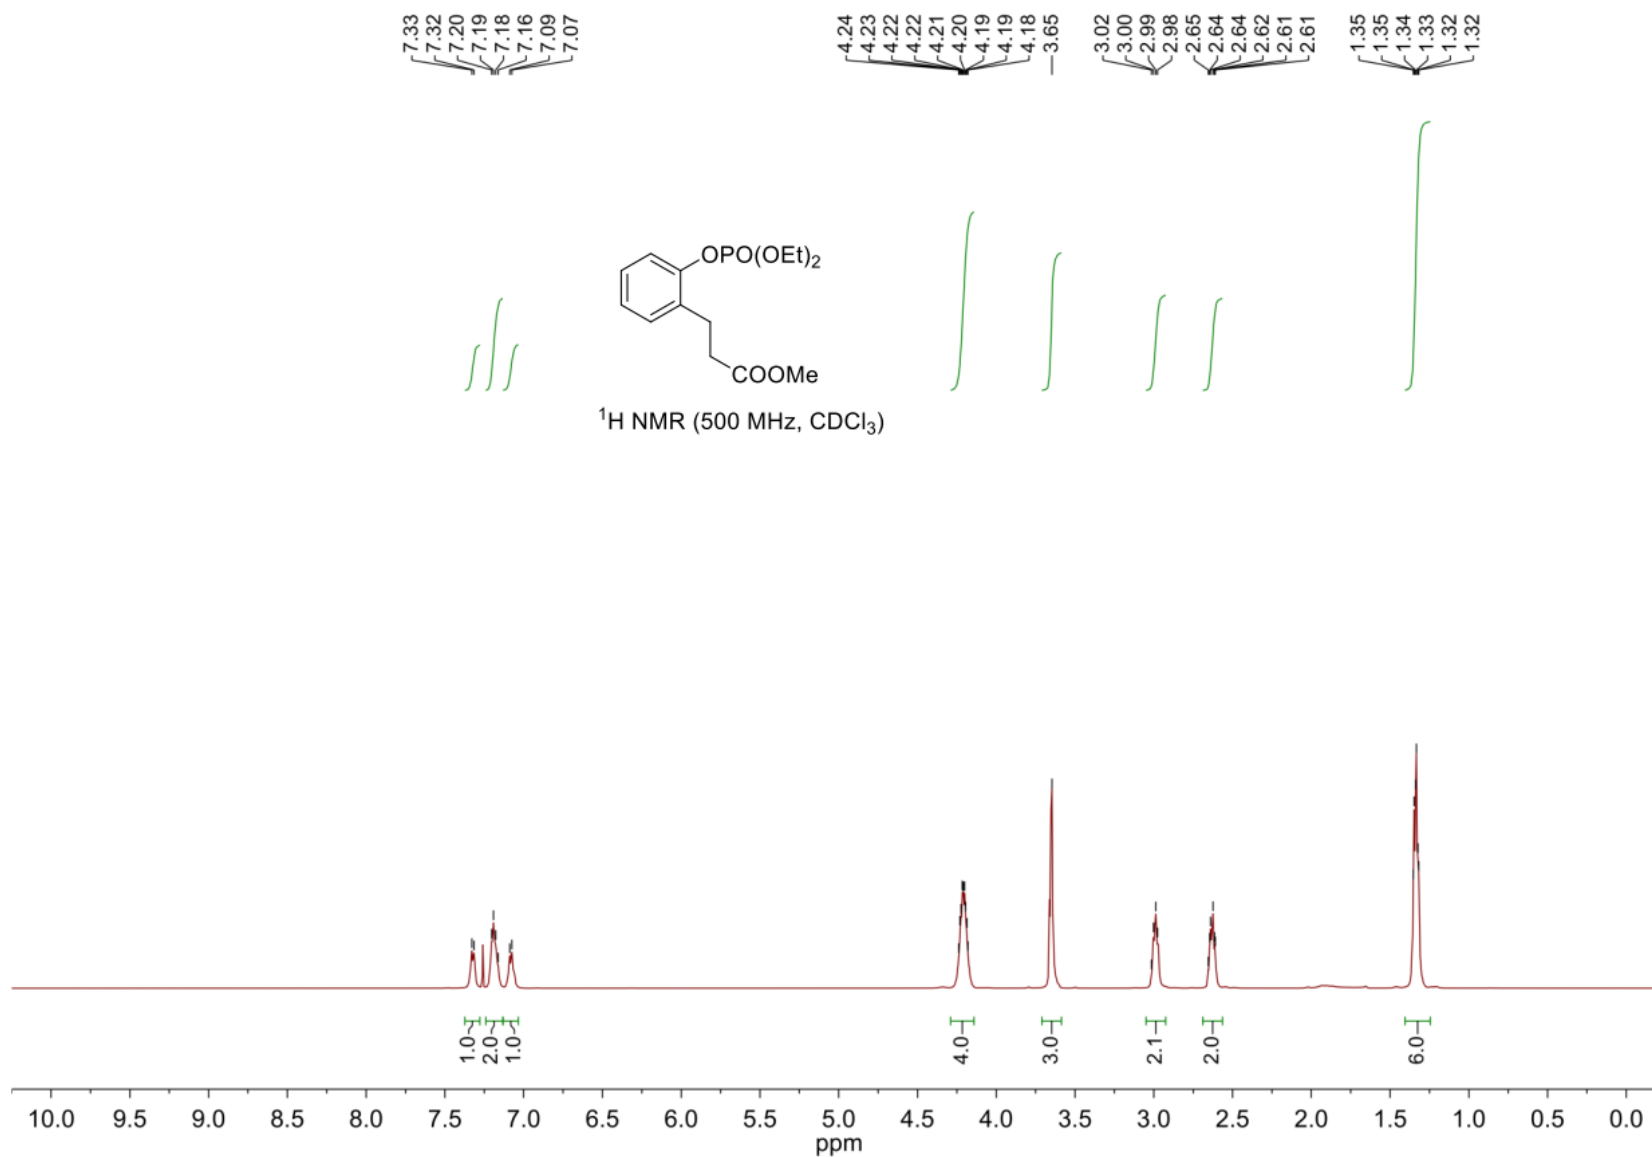

# Methyl 3-(2-((diethoxyphosphoryl)oxy)phenyl)propanoate (S5)

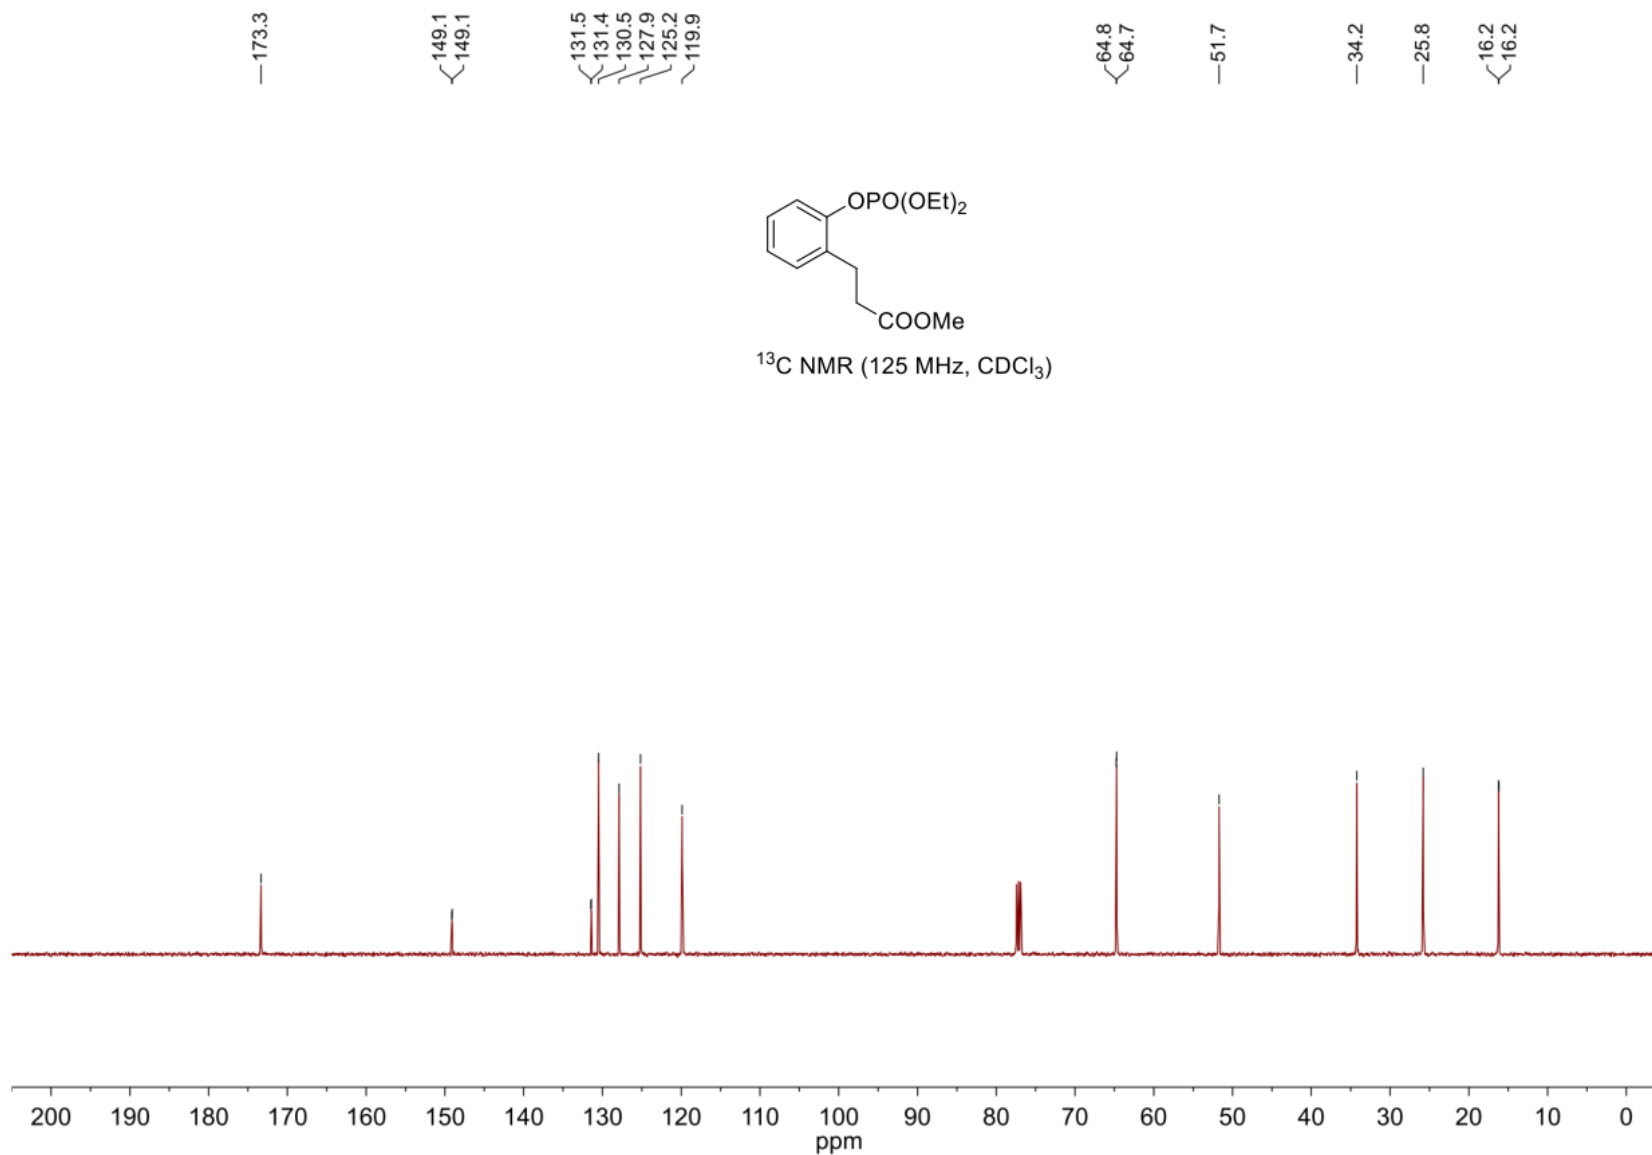

# Diethyl (4-(2-oxo-2-(piperidin-1-yl)ethyl)phenyl) phosphate (S6)

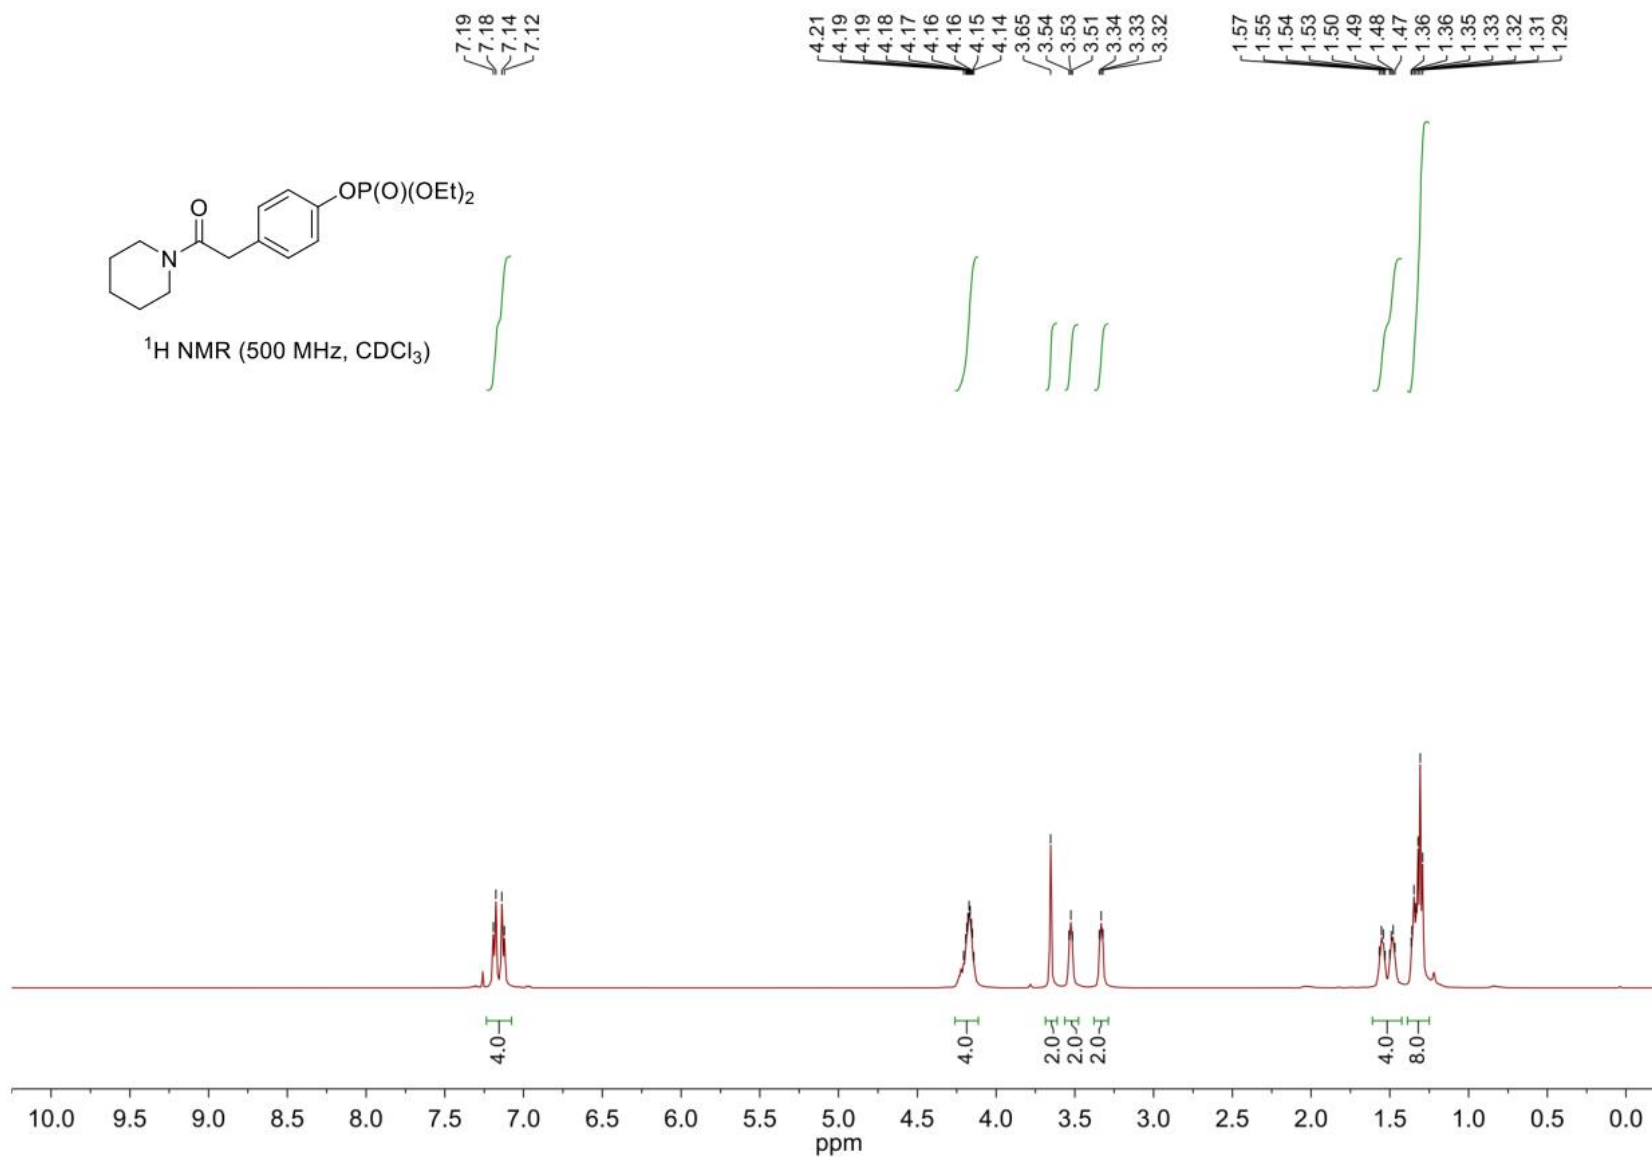

# Diethyl (4-(2-oxo-2-(piperidin-1-yl)ethyl)phenyl) phosphate (S6)

— 169.0  
— 149.6  
— 149.5  
— 132.2  
— 129.9  
— 120.2  
— 120.1  
— 64.6  
— 64.6  
— 47.3  
— 42.9  
— 40.3  
— 26.3  
— 25.5  
— 24.5  
— 16.2  
— 16.1

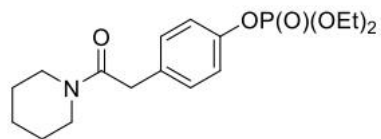

$^{13}\text{C}$  NMR (125 MHz,  $\text{CDCl}_3$ )

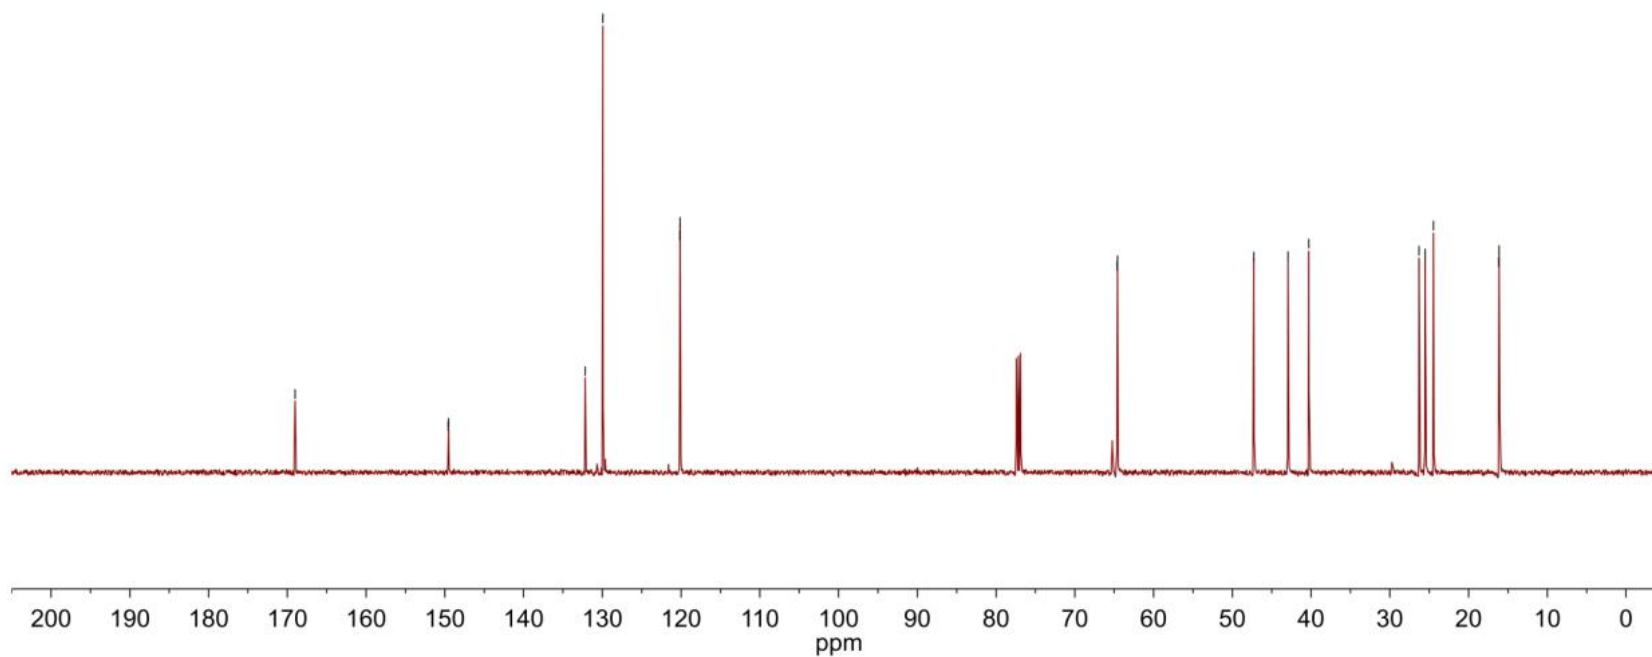

S230

# Diethyl (4-(2-oxo-2-(pyrrolidin-1-yl)ethyl)phenyl) phosphate (S7)

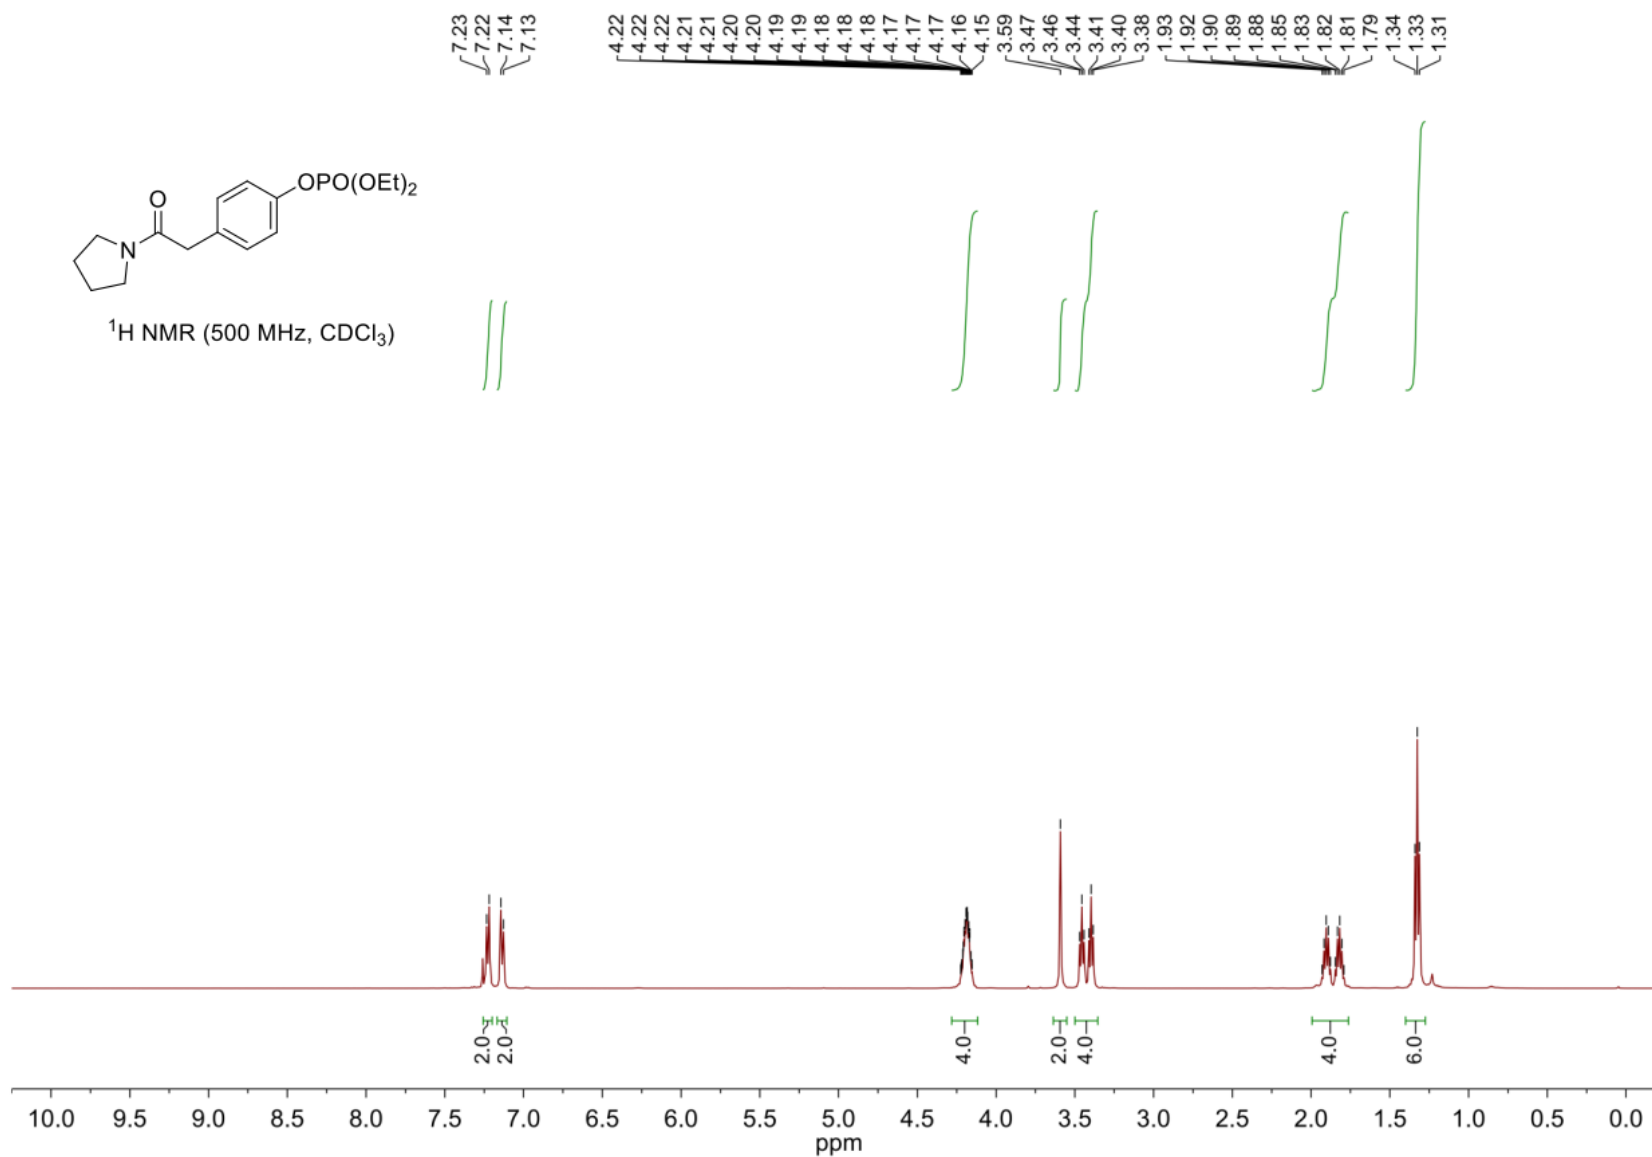

S231

# Diethyl (4-(2-oxo-2-(pyrrolidin-1-yl)ethyl)phenyl) phosphate (S7)

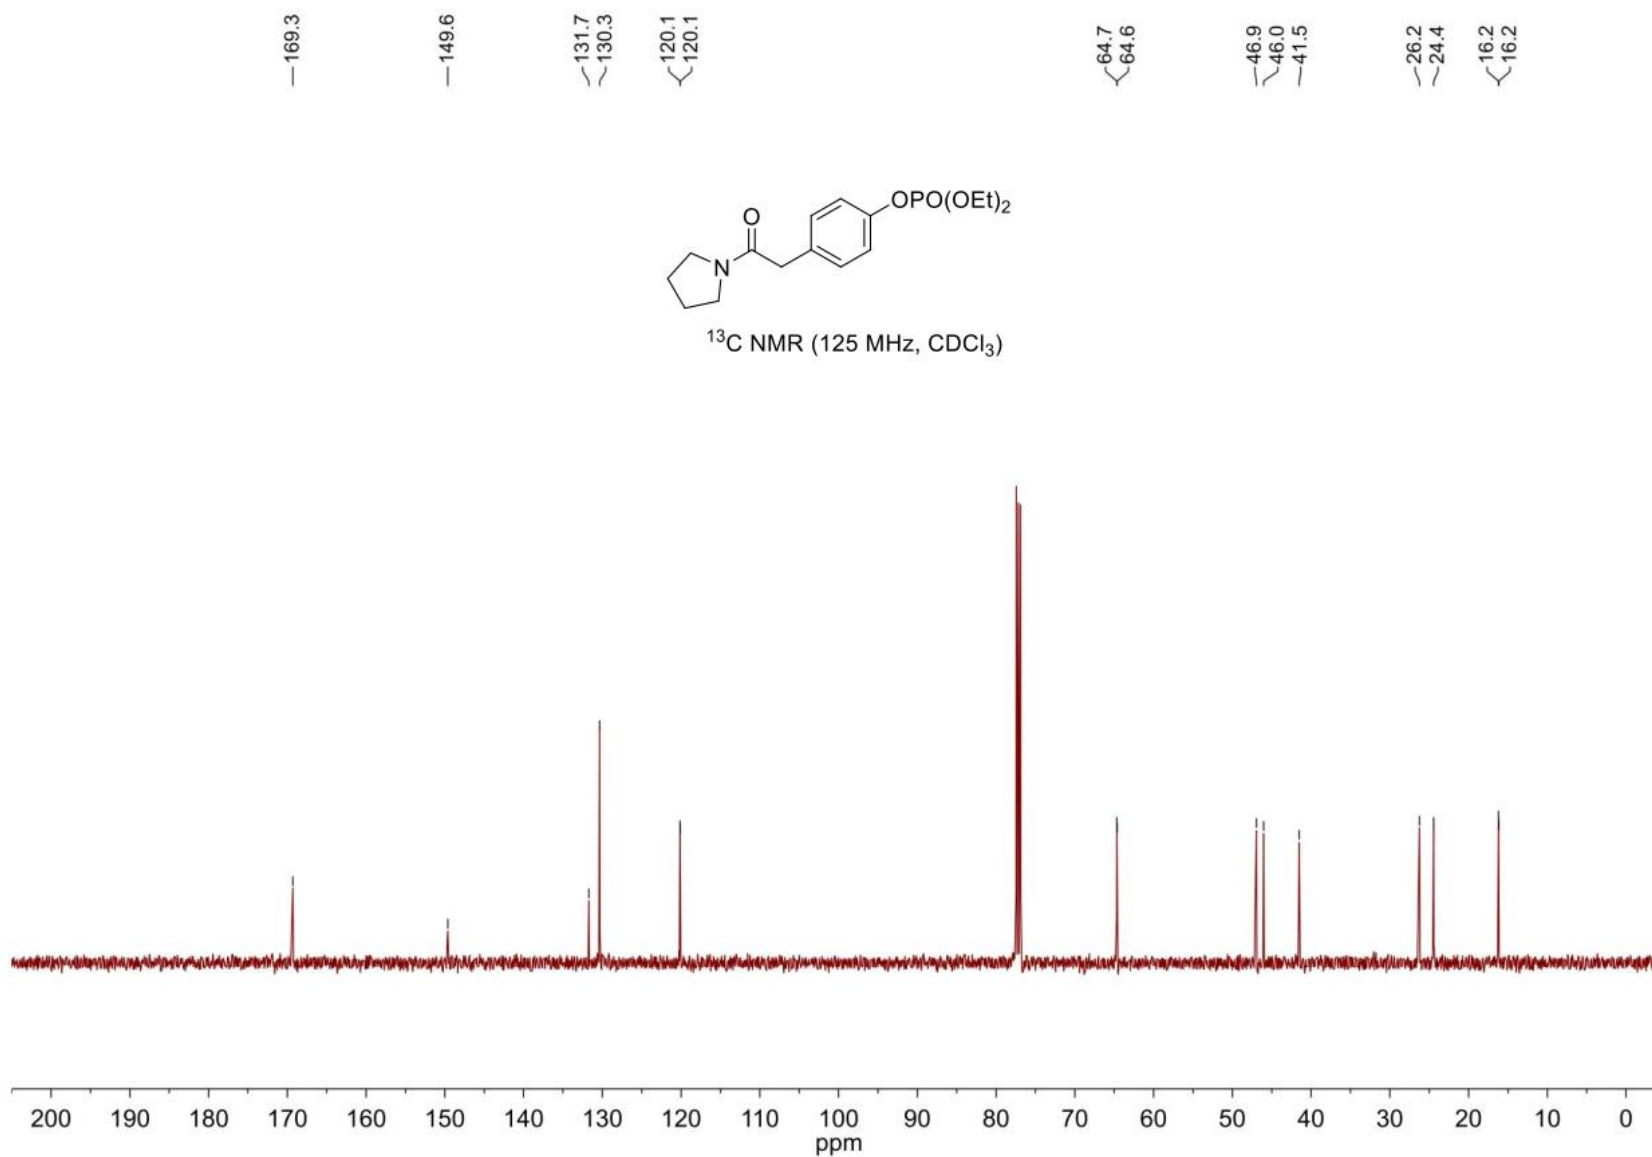

S232



# Diethyl (4-(2-(indolin-1-yl)-2-oxoethyl)phenyl) phosphate (S8)

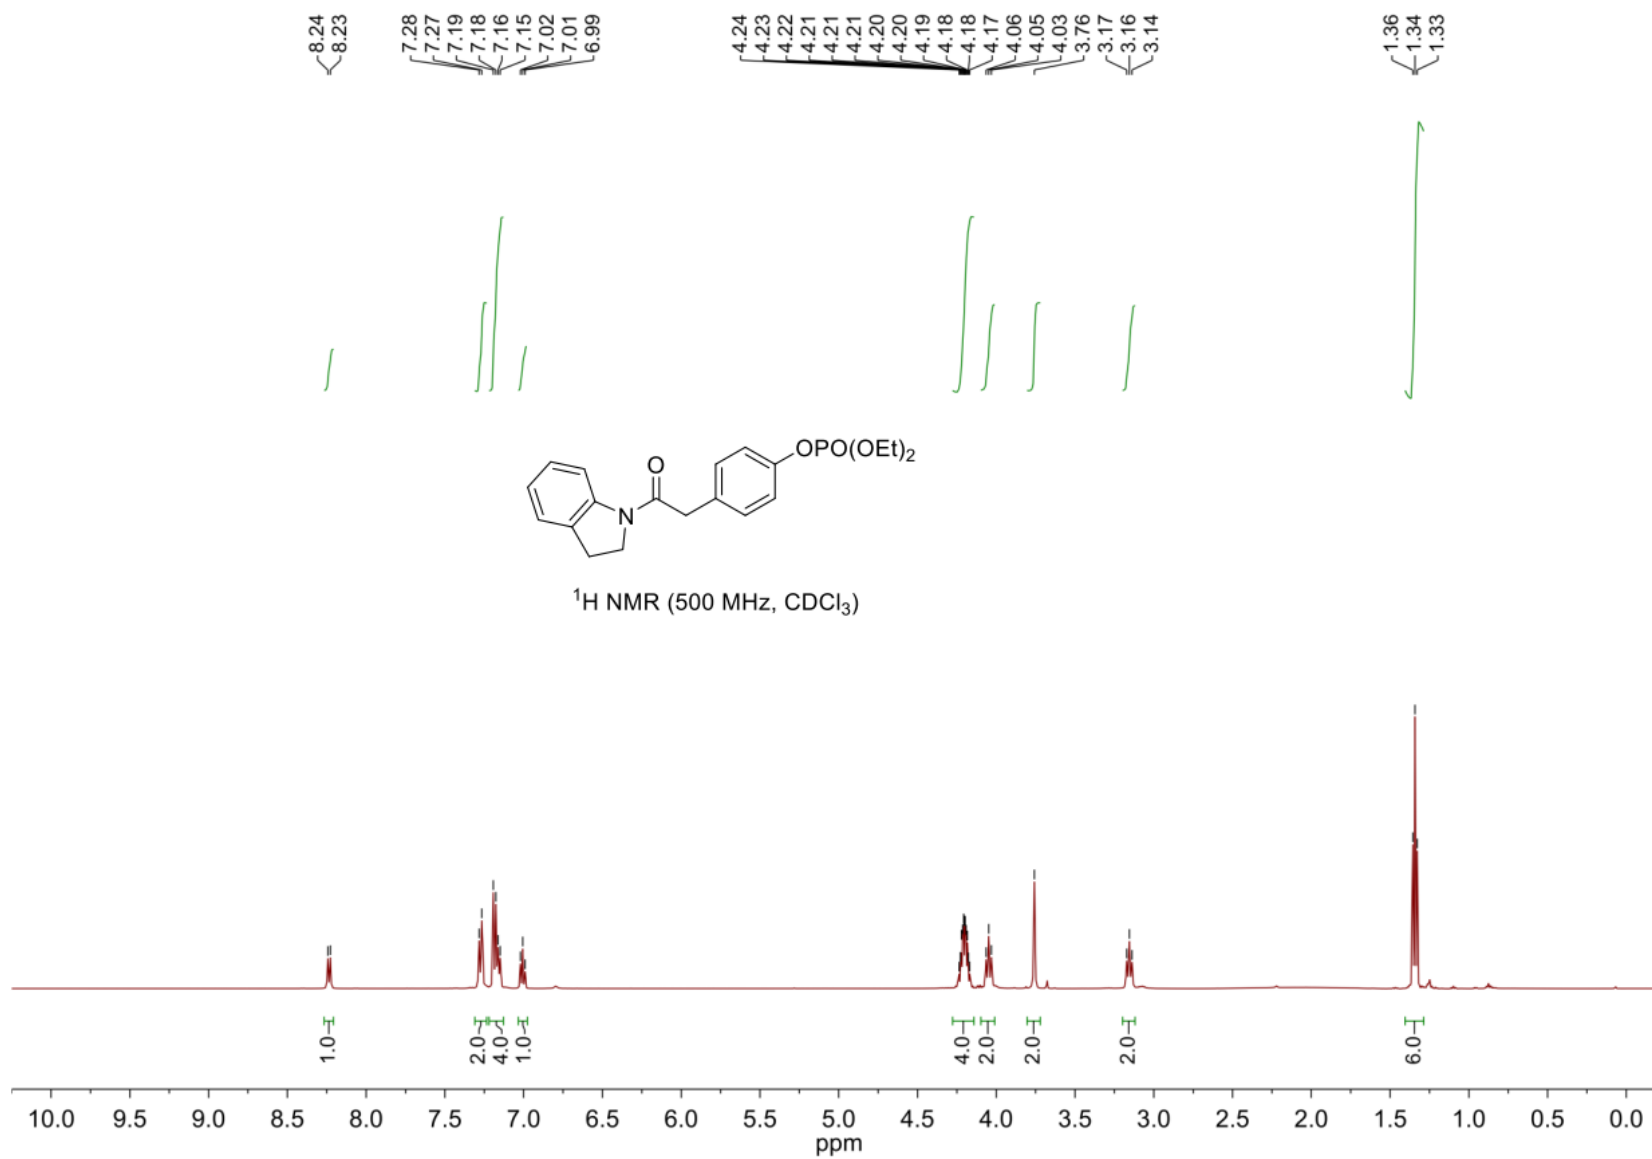

S233

# Diethyl (4-(2-(indolin-1-yl)-2-oxoethyl)phenyl) phosphate (S8)

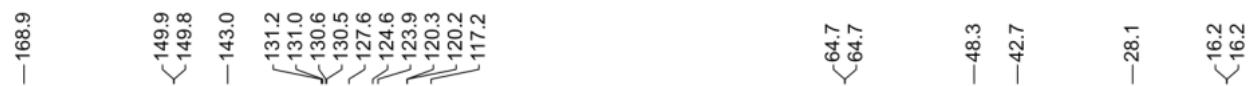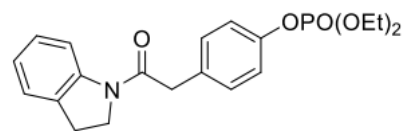

<sup>13</sup>C NMR (125 MHz, CDCl<sub>3</sub>)

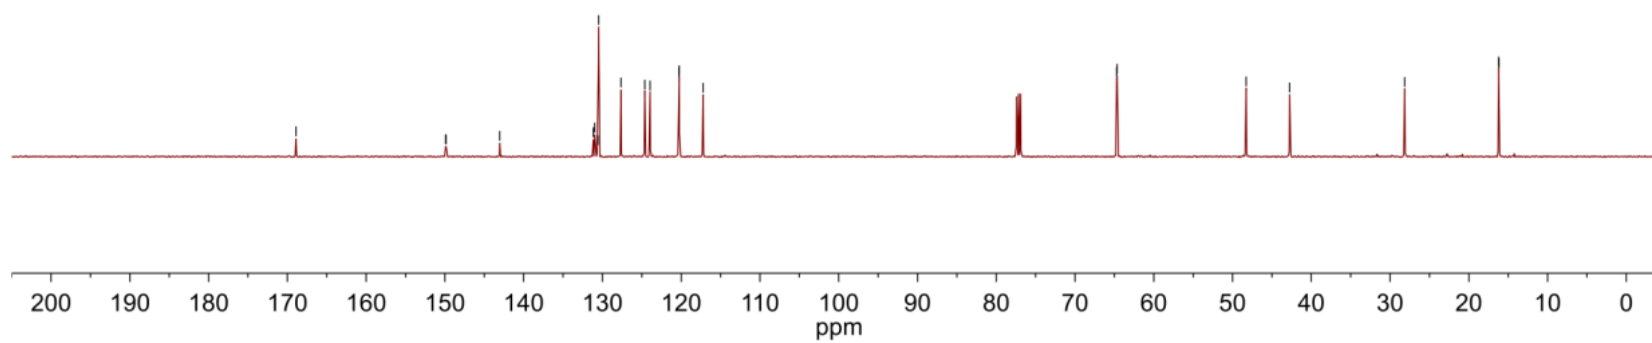

# Diethyl (4-(2-morpholino-2-oxoethyl)phenyl) phosphate (S9)

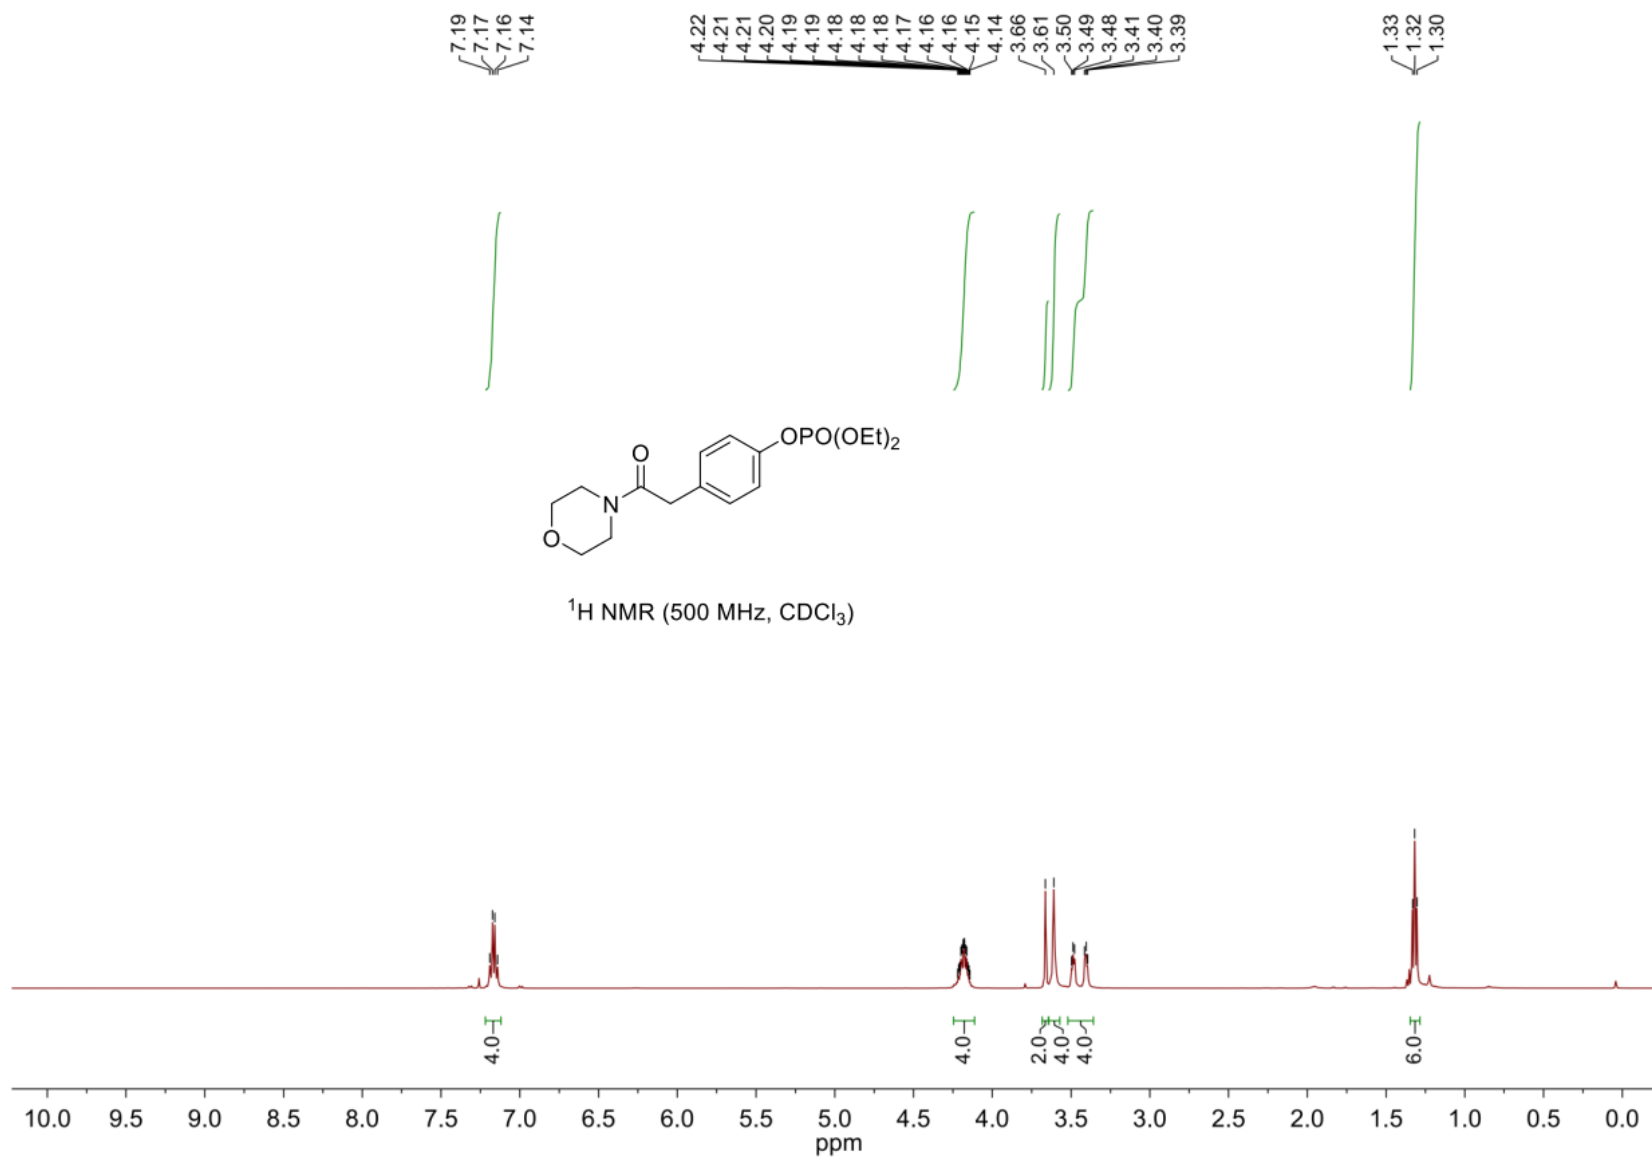

S235

# Diethyl (4-(2-morpholino-2-oxoethyl)phenyl) phosphate (S9)

— 169.4  
149.8  
149.7  
131.5  
130.0  
120.3  
120.3  
66.8  
66.5  
64.7  
64.6  
46.5  
42.2  
39.9  
16.2  
16.1

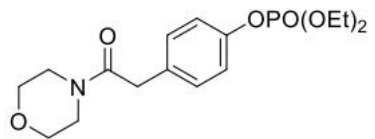

$^{13}\text{C}$  NMR (125 MHz,  $\text{CDCl}_3$ )

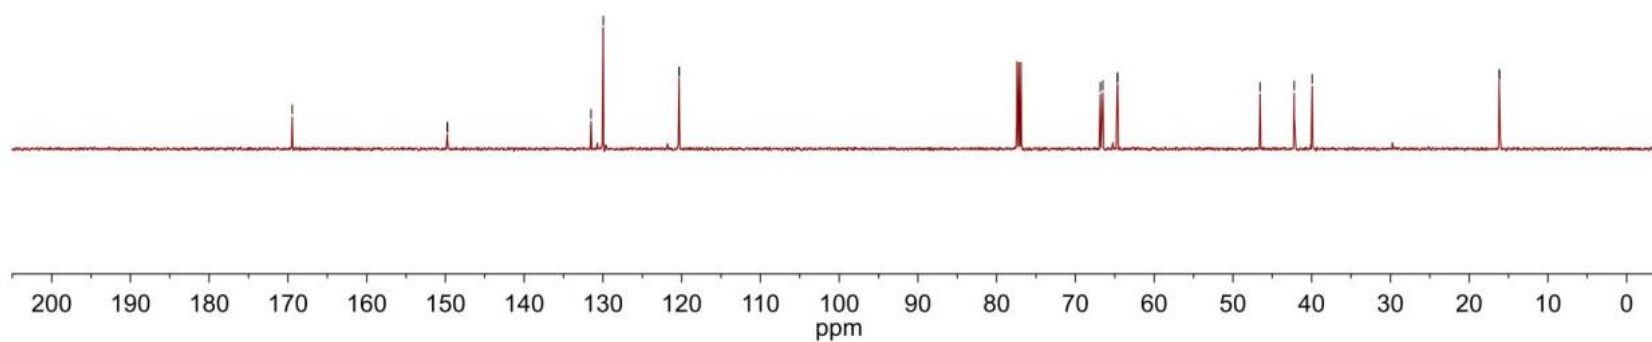

S236

# Diethyl (4-(pyrrolidine-1-carbonyl)phenyl) phosphate (S10)

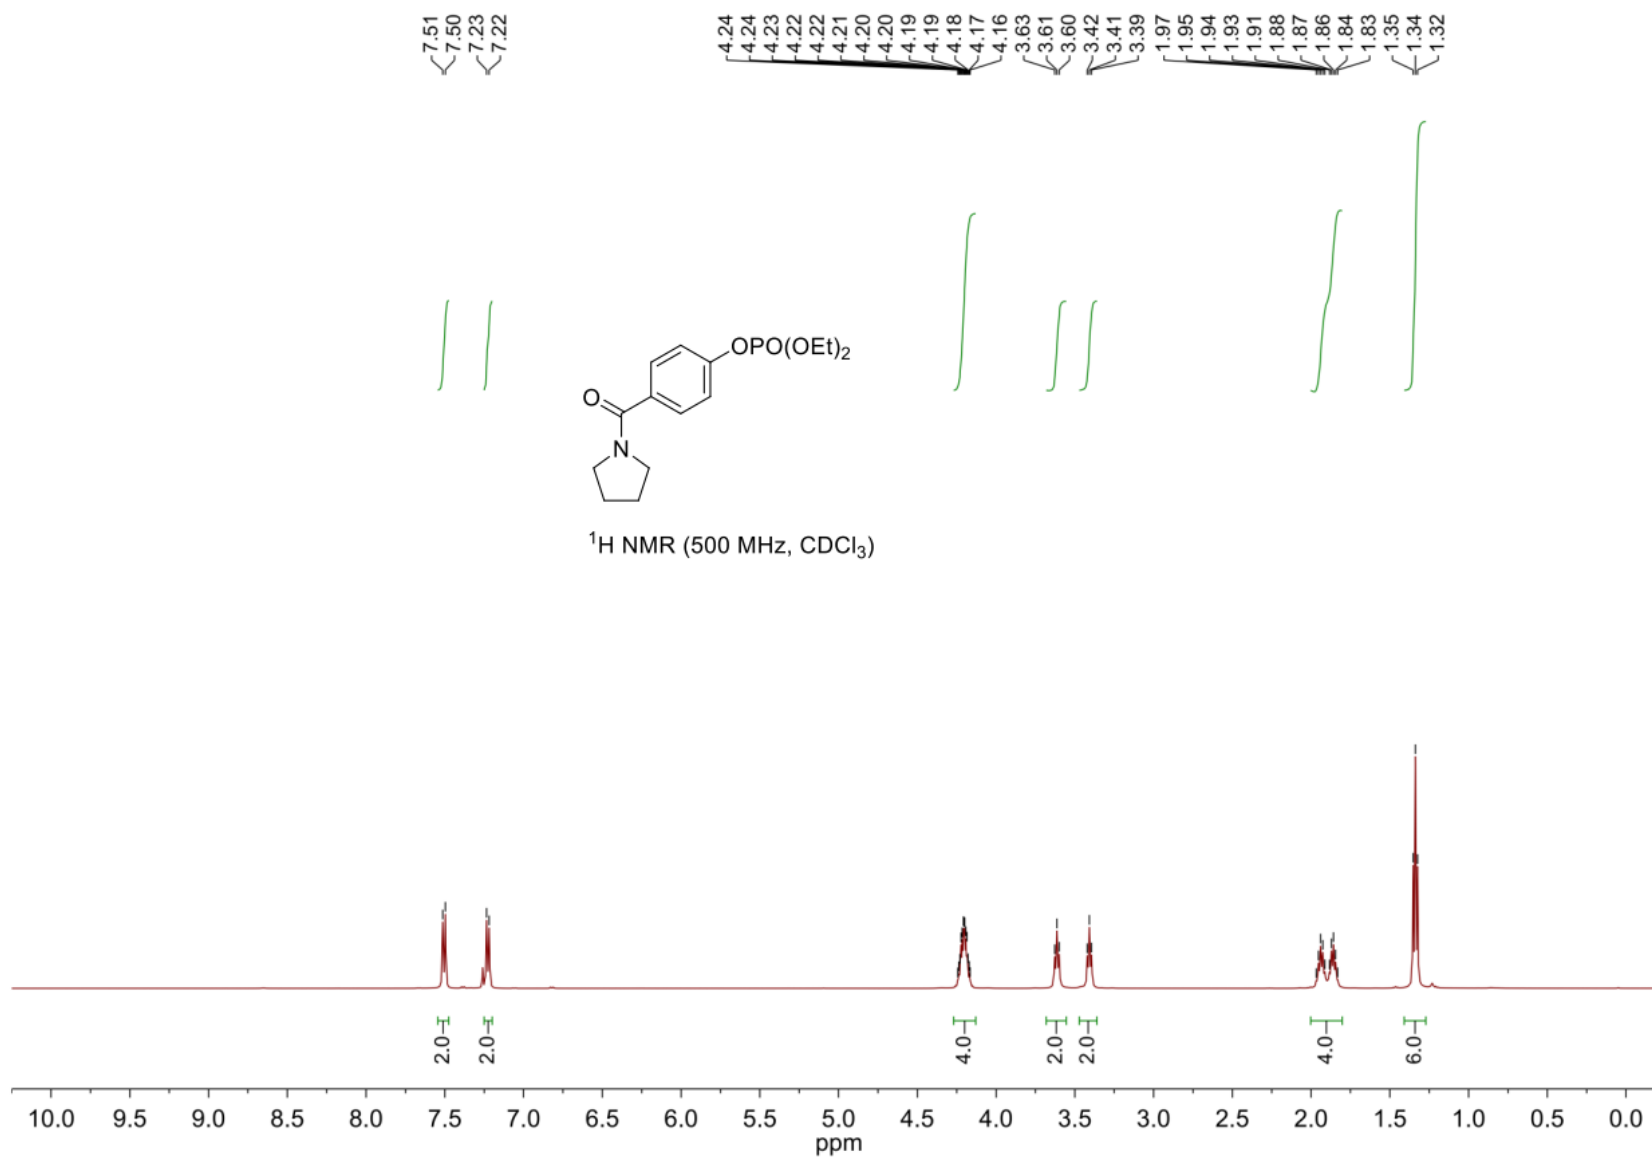

# Diethyl (4-(pyrrolidine-1-carbonyl)phenyl) phosphate (S10)

—169.1  
152.1  
152.1  
—134.2  
—129.3  
120.1  
120.1  
65.1  
65.1  
—50.0  
—46.6  
26.8  
24.8  
16.5  
16.4

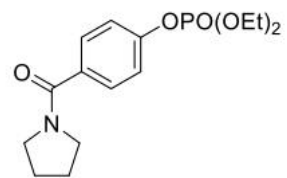

<sup>13</sup>C NMR (125 MHz, CDCl<sub>3</sub>)

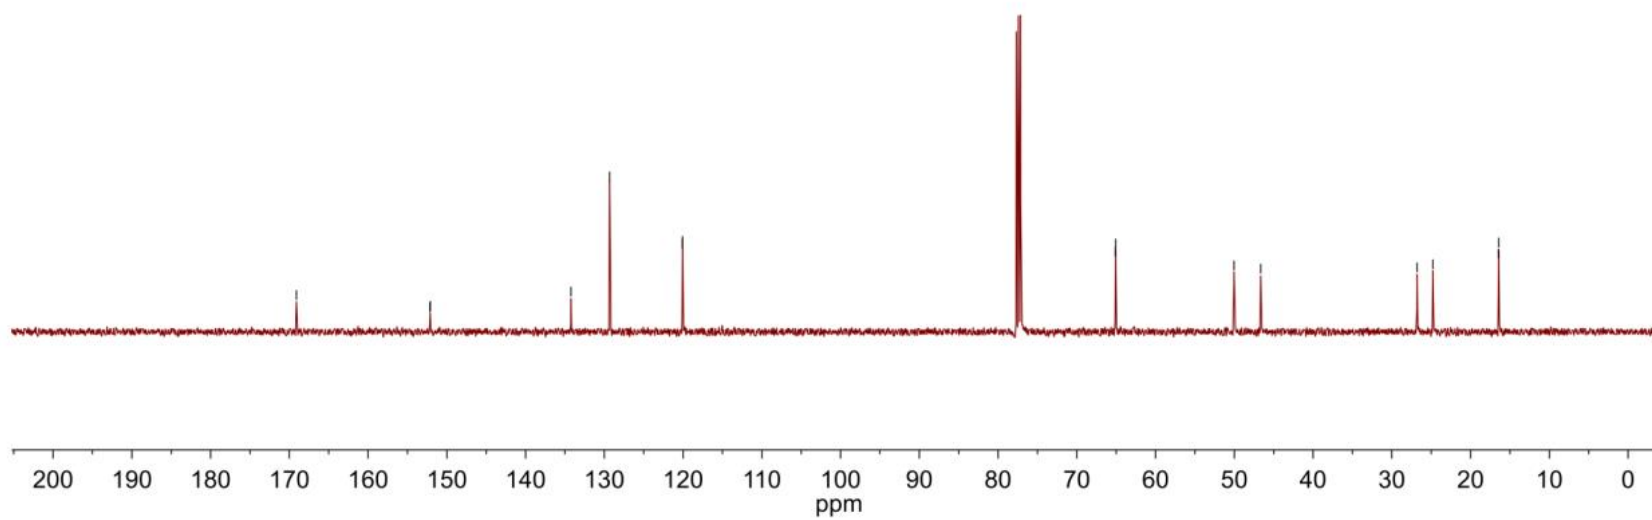

S238

*tert*-Butyl 4-(4-((diethoxyphosphoryl)oxy)benzamido)piperidine-1-carboxylate (S11)

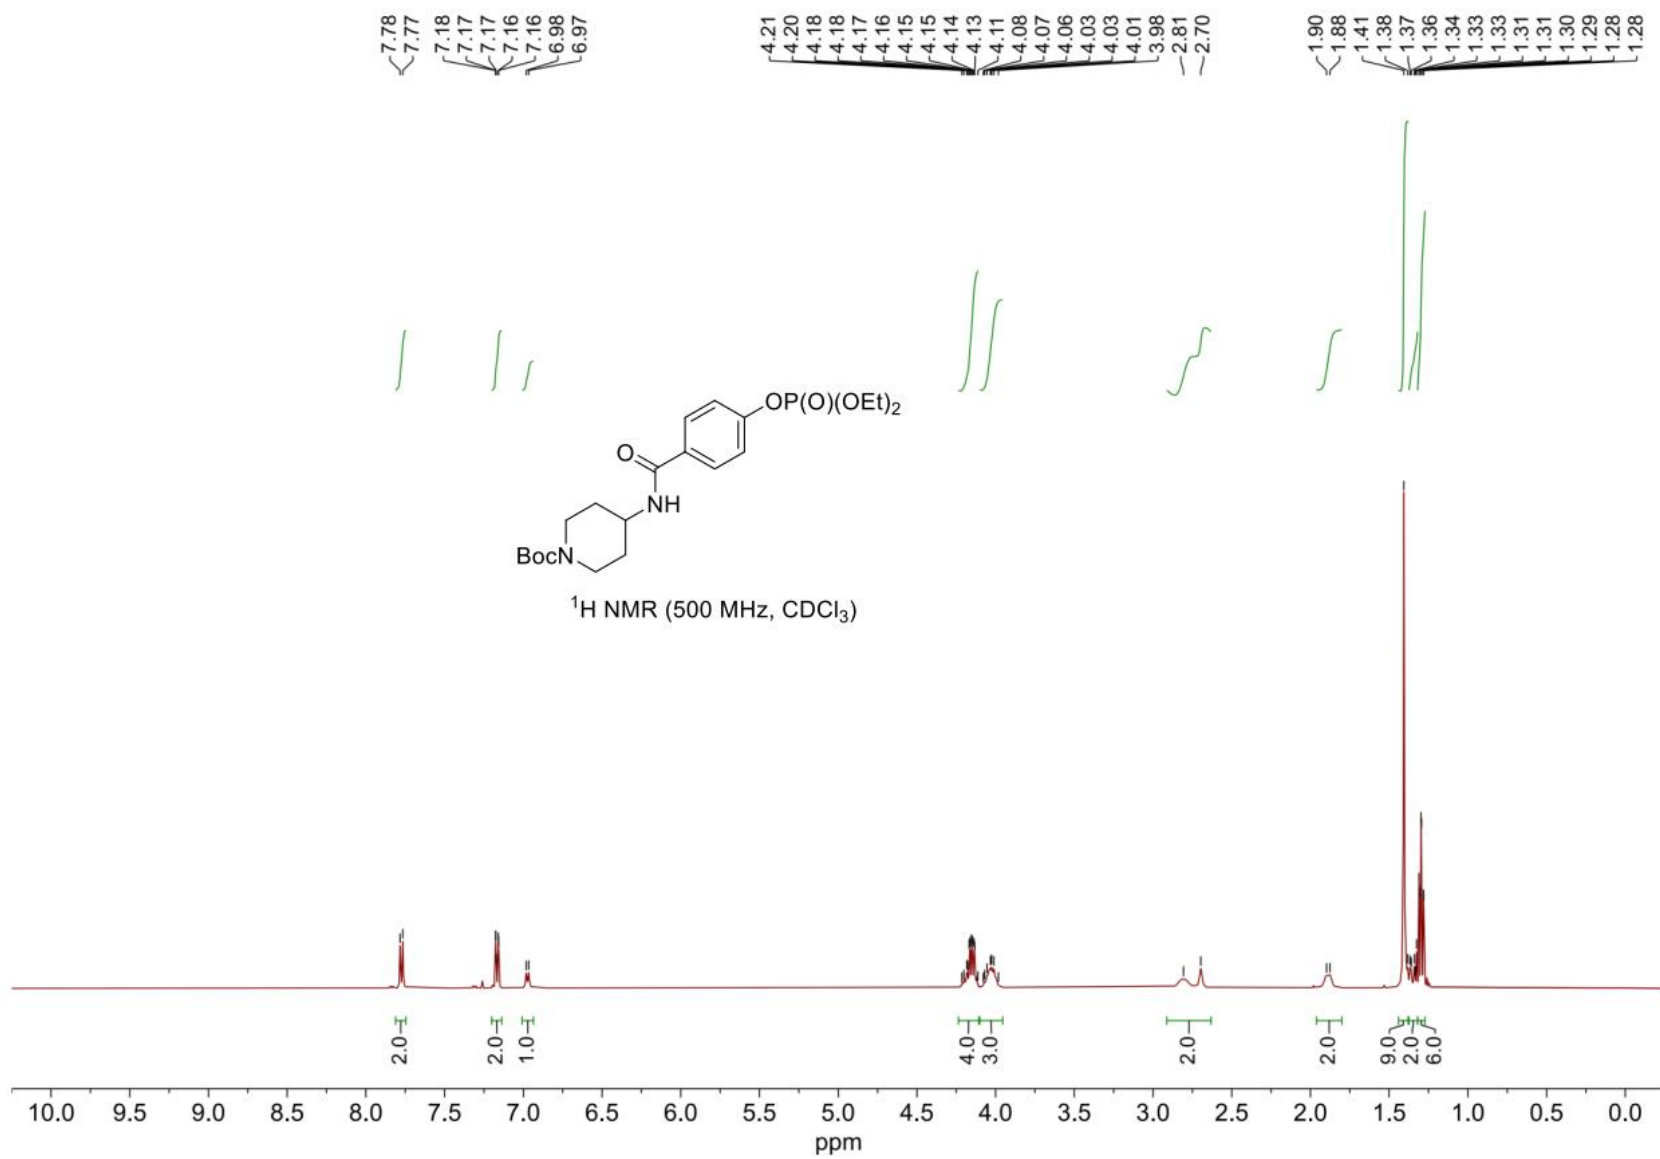

***tert*-Butyl 4-((diethoxyphosphoryl)oxy)benzamido)piperidine-1-carboxylate (S11)**

— 166.0  
— 154.7  
— 152.9  
— 152.9  
— 131.4  
— 129.1  
— 119.7  
— 119.7  
— 79.6  
— 64.9  
— 64.8  
— 47.3  
— 42.9  
— 31.8  
— 28.4  
— 16.1  
— 16.0

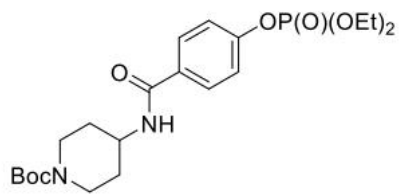

<sup>13</sup>C NMR (125 MHz, CDCl<sub>3</sub>)

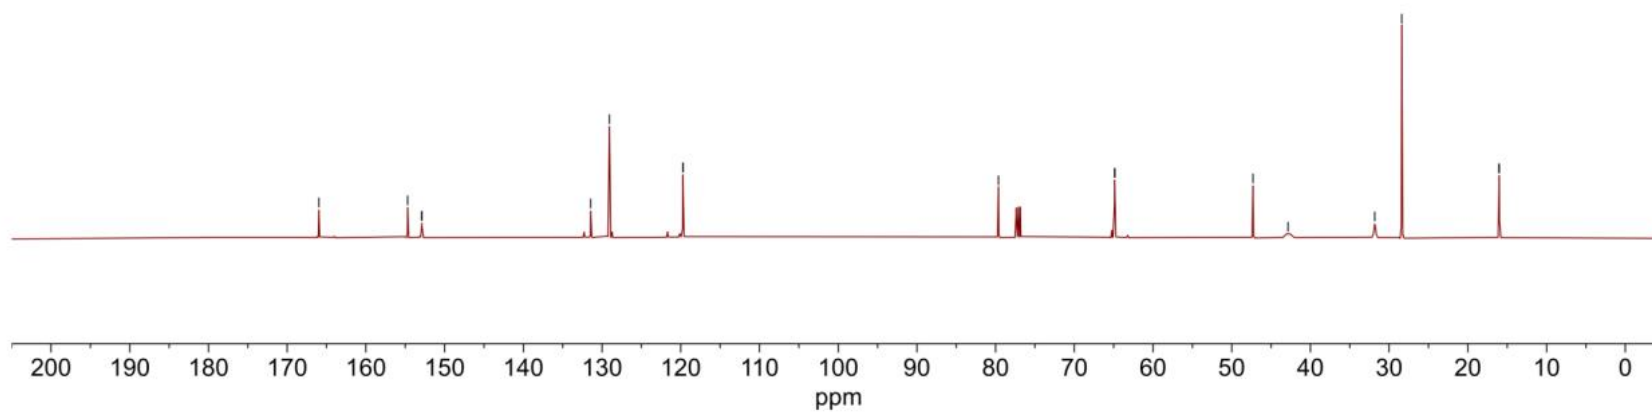



*tert*-Butyl 5-((diethoxyphosphoryl)oxy)-3,4-dihydroquinoline-1(2*H*)-carboxylate (S12)

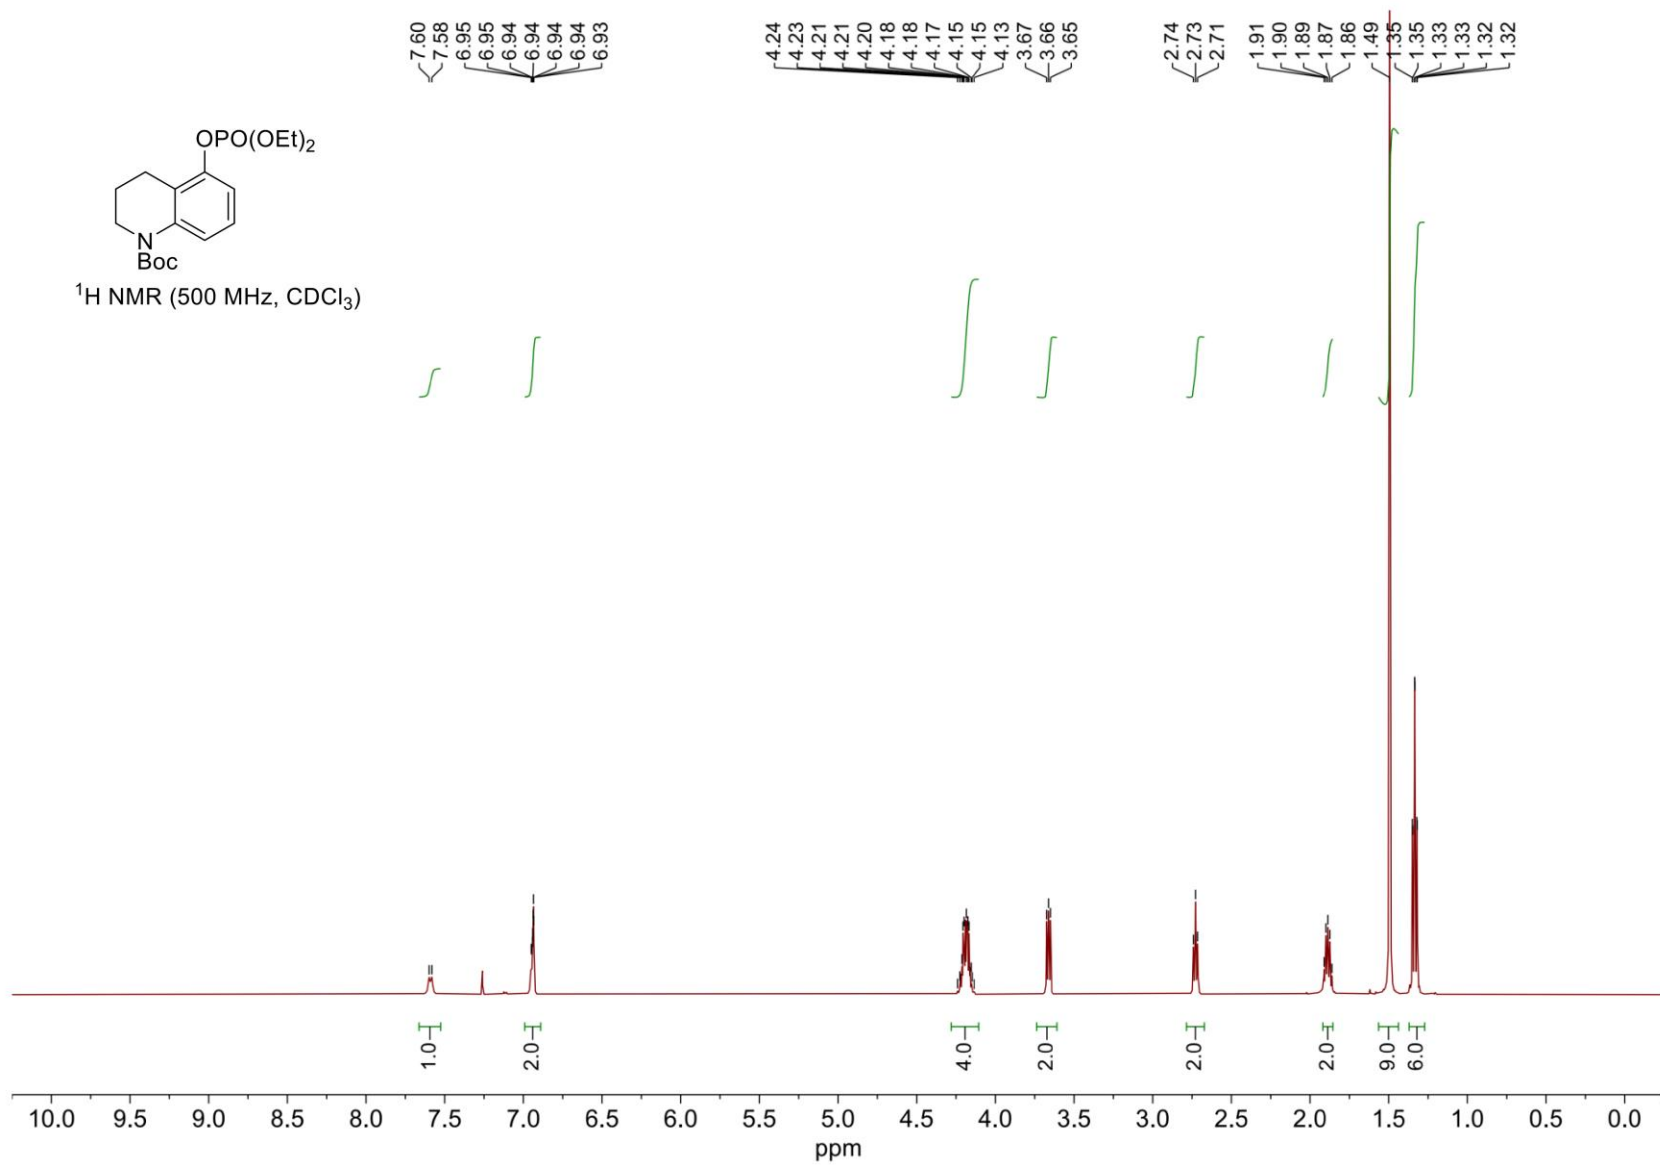

S241

***tert*-Butyl 5-((diethoxyphosphoryl)oxy)-3,4-dihydroquinoline-1(2*H*)-carboxylate (S12)**

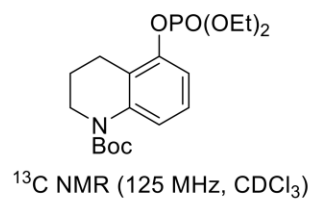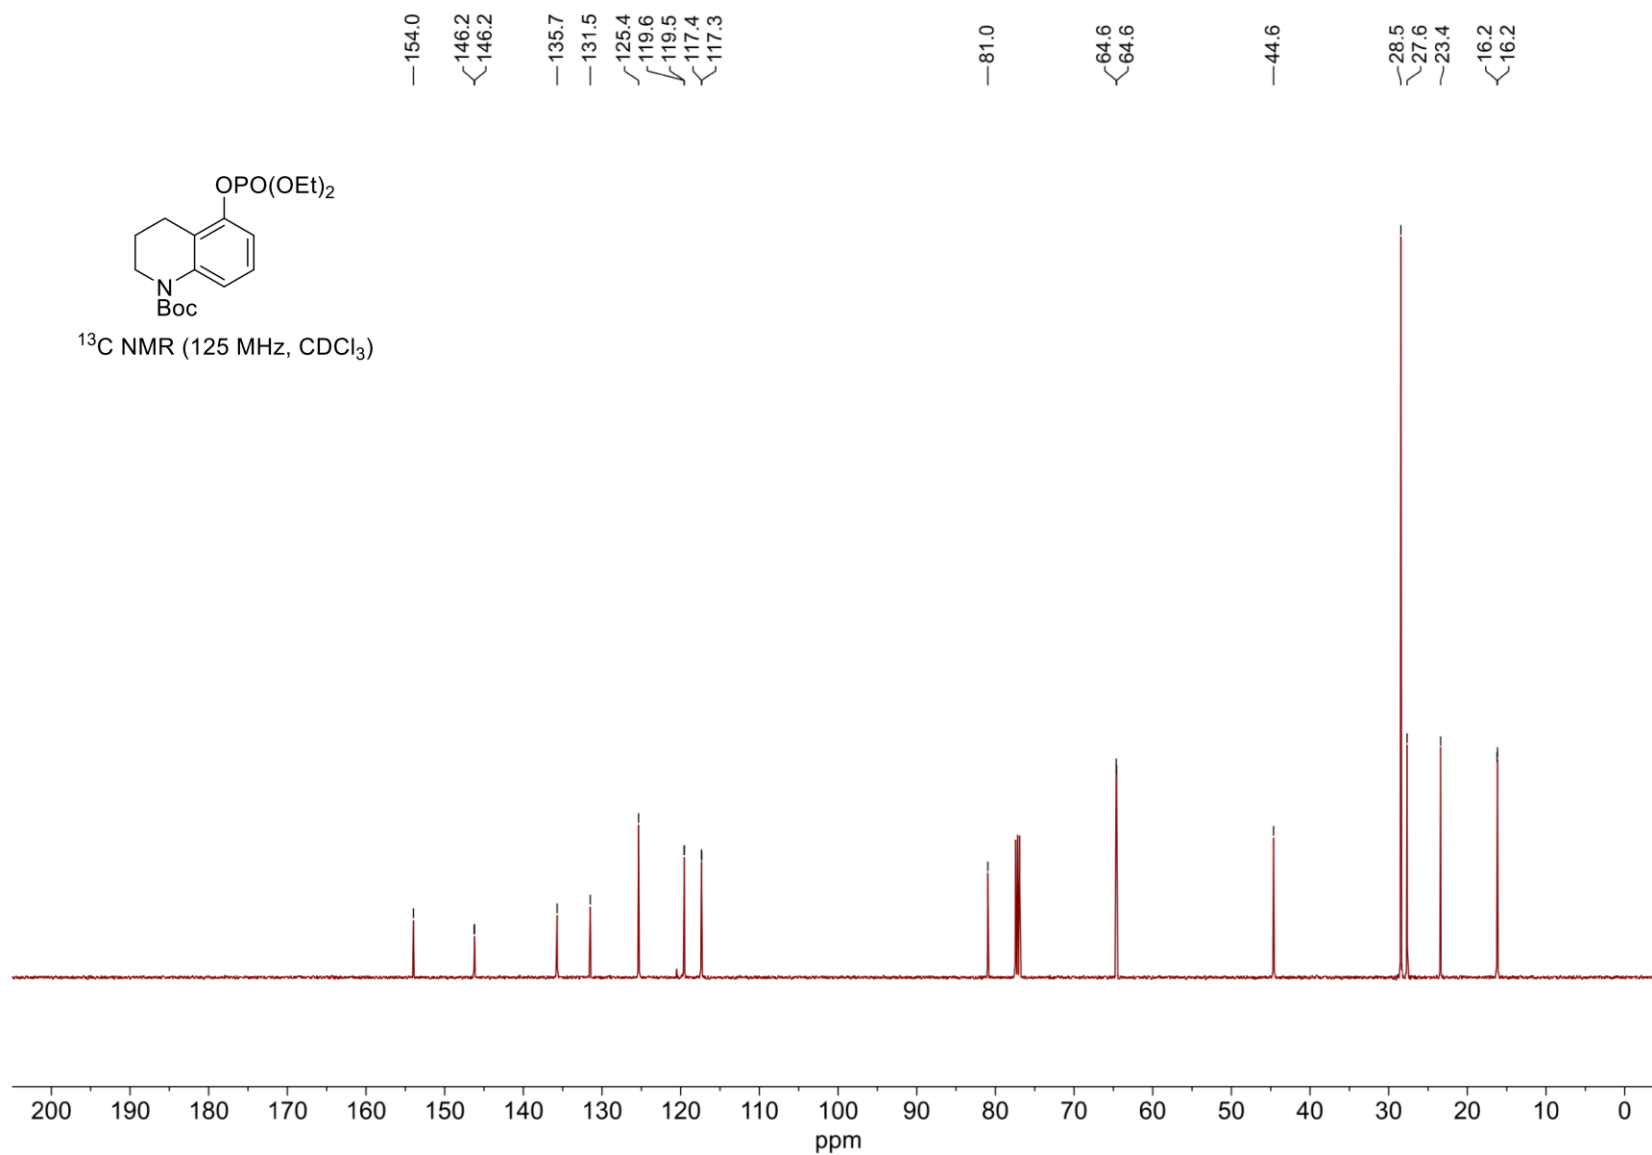

S242

*tert*-Butyl 4-((diethoxyphosphoryl)oxy)indoline-1-carboxylate (S13)

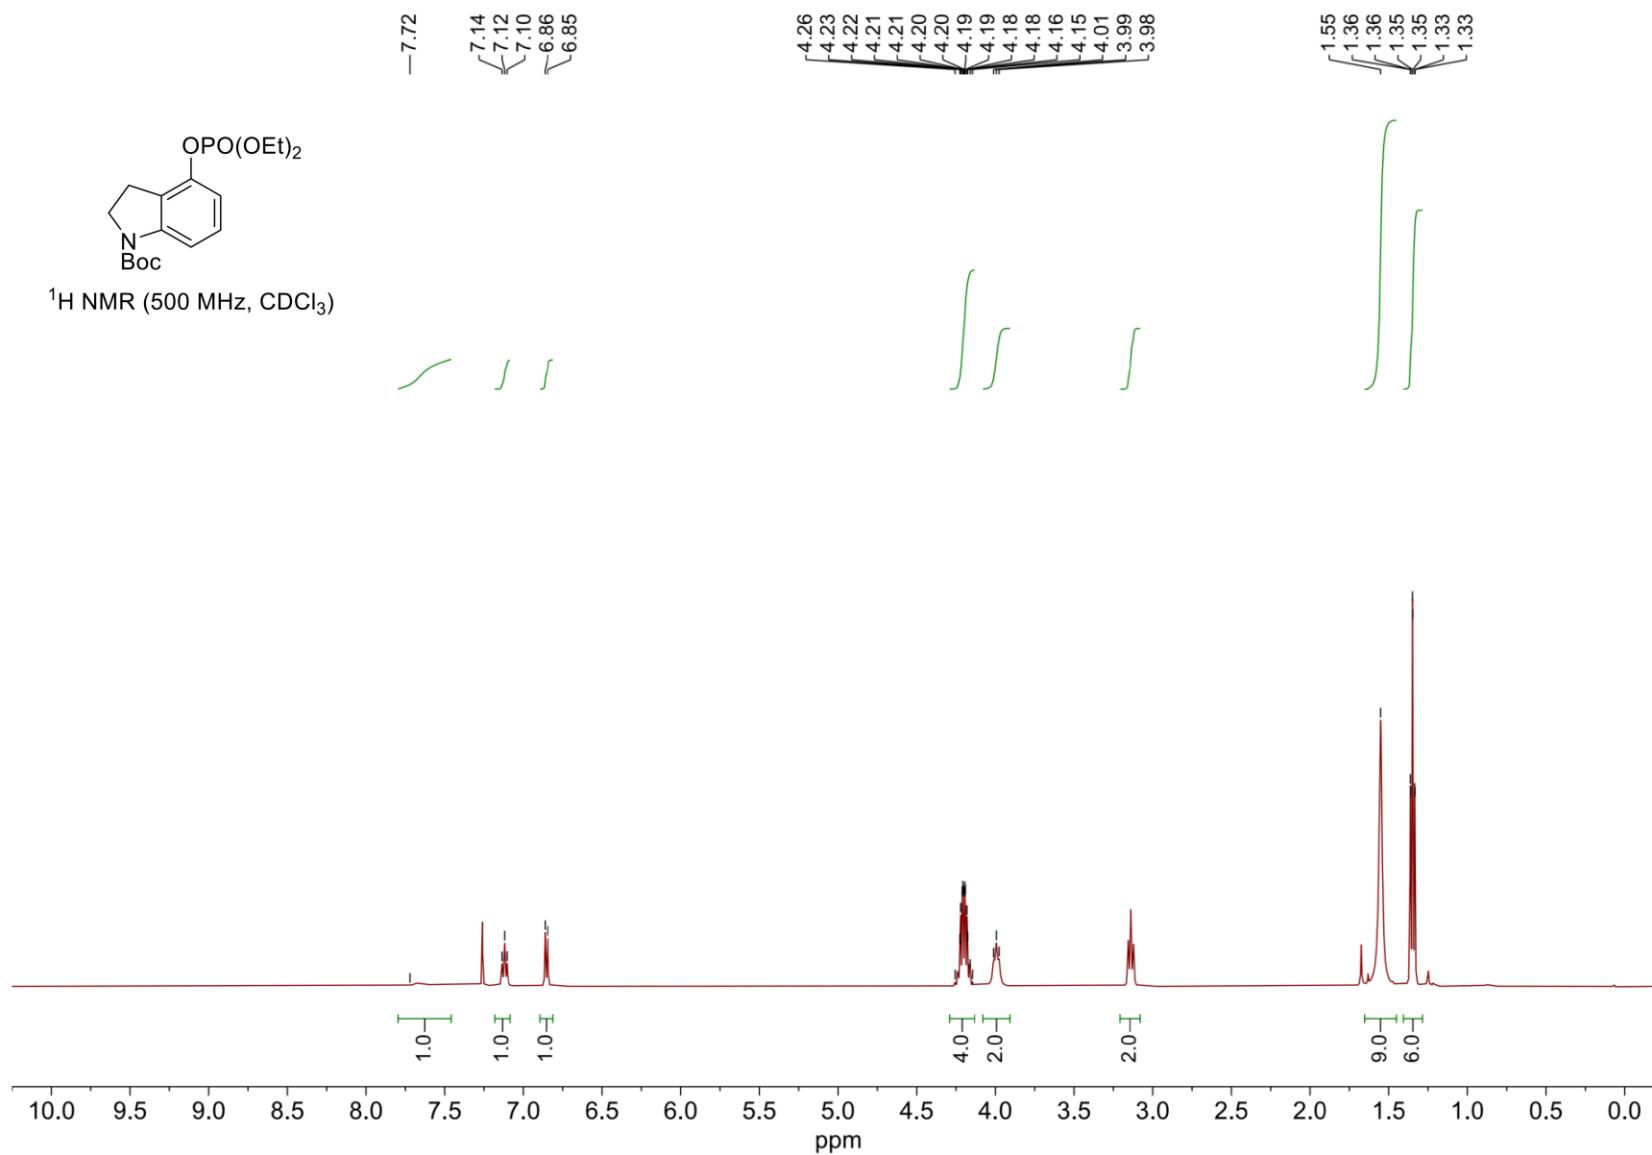

S243

*tert*-Butyl 4-((diethoxyphosphoryl)oxy)indoline-1-carboxylate (S13)

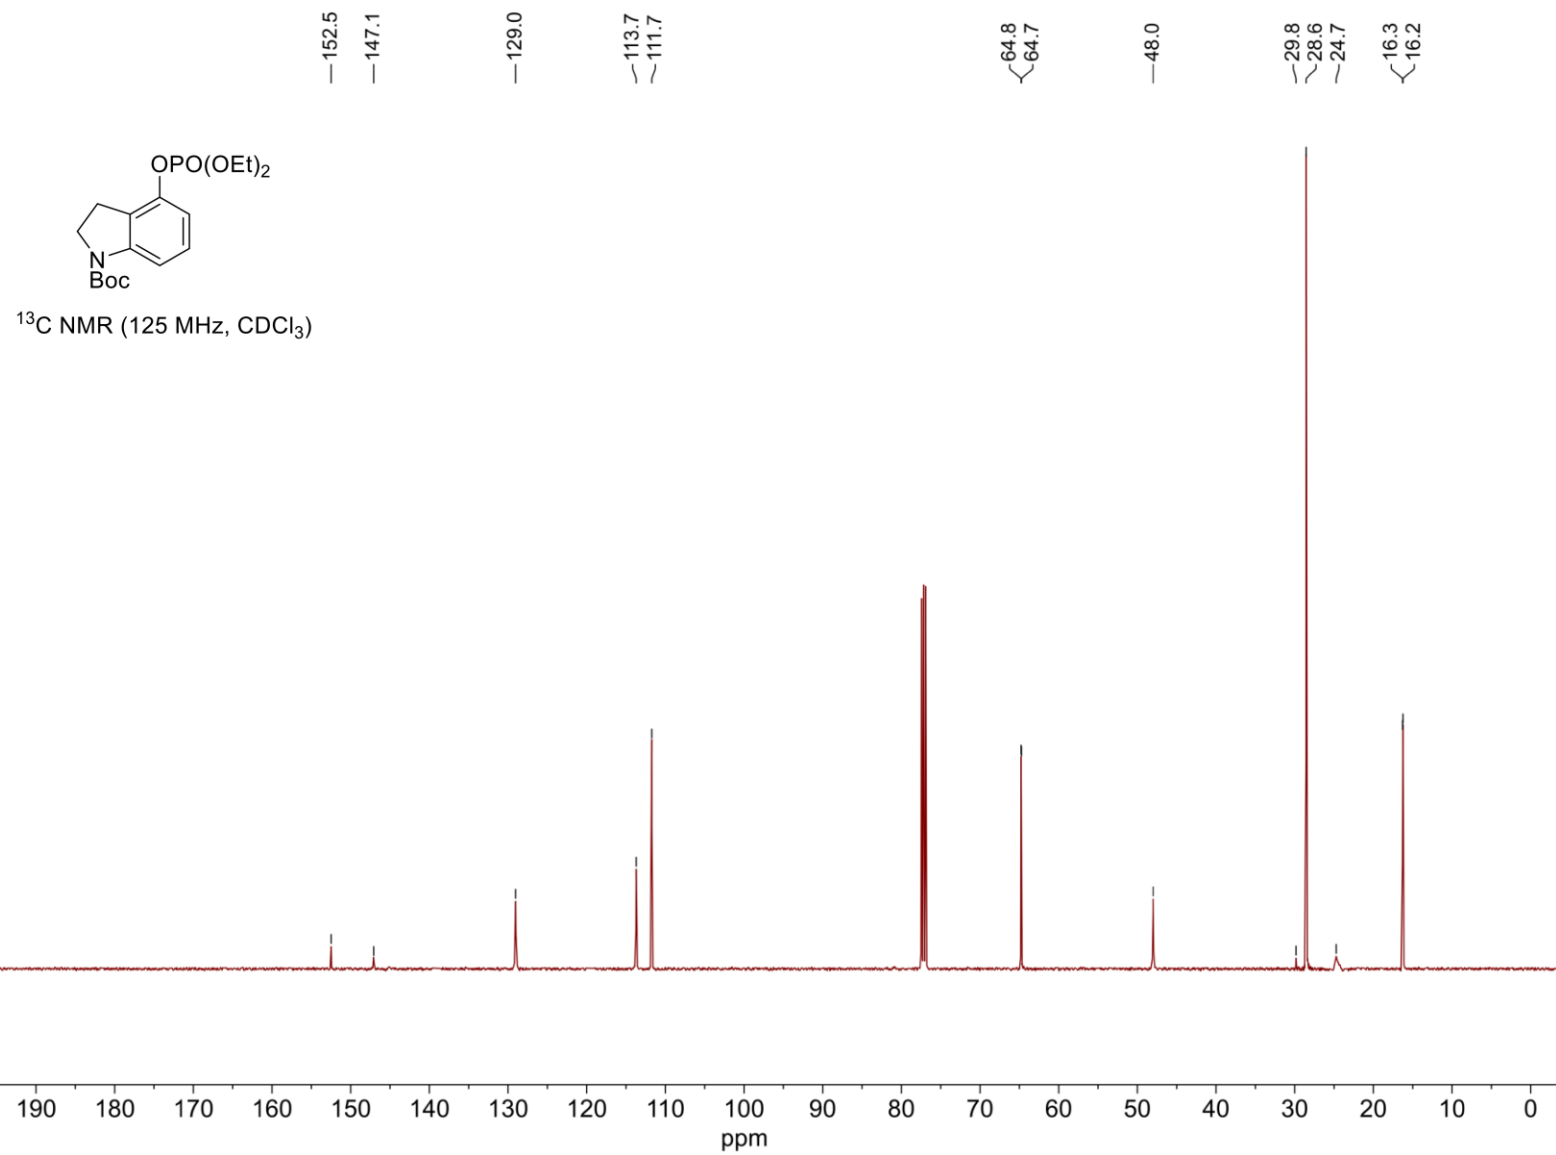



Diethyl ((8*R*,9*S*,13*S*,14*S*)-13-methyl-6,7,8,9,11,12,13,14,15,16-decahydrospiro[cyclopenta[*a*]phenanthrene-17,2'-[1,3]dioxolan]-3-yl)  
phosphate (S14)

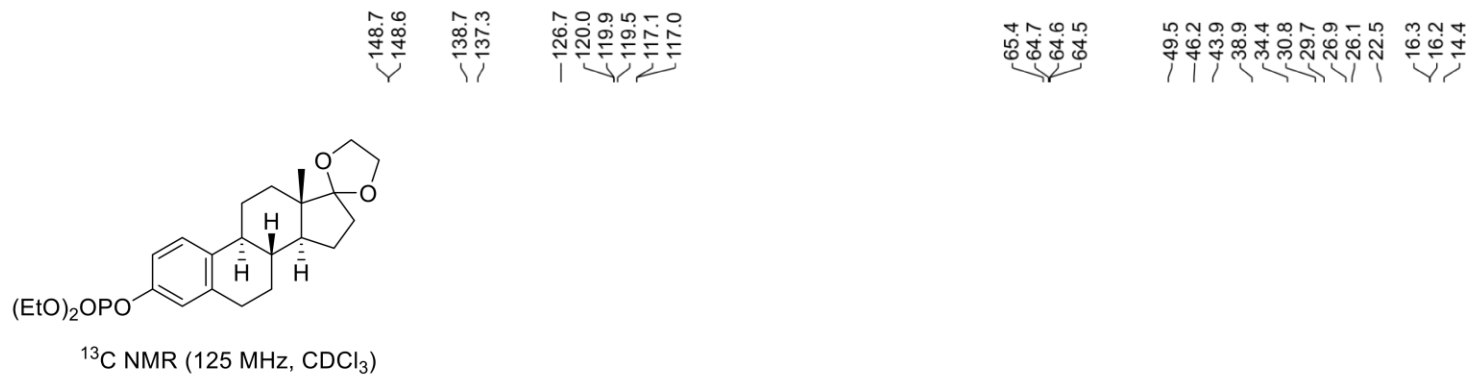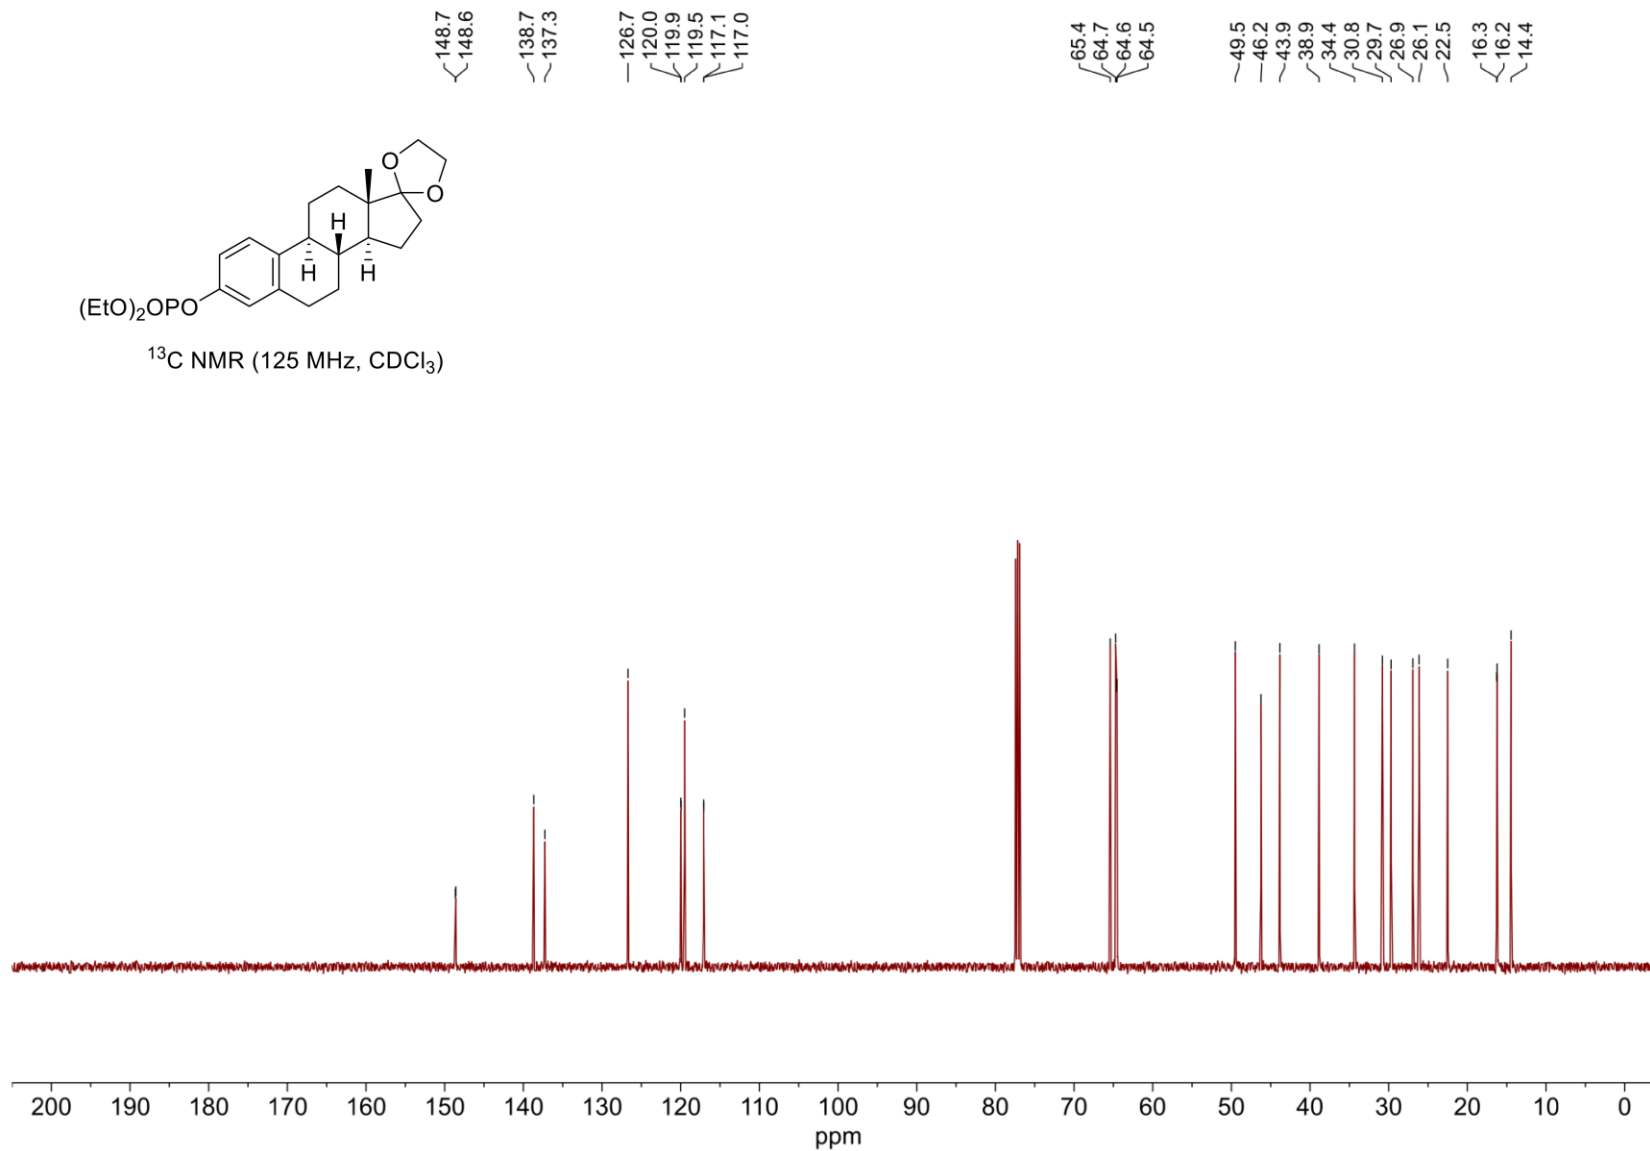

S246

**(8R,9S,13S,14S,17S)-17-((*tert*-Butyldimethylsilyl)oxy)-13-methyl-7,8,9,11,12,13,14,15,16,17-decahydro-6H-cyclopenta[a]phenanthren-3-yl diethyl phosphate (S15)**

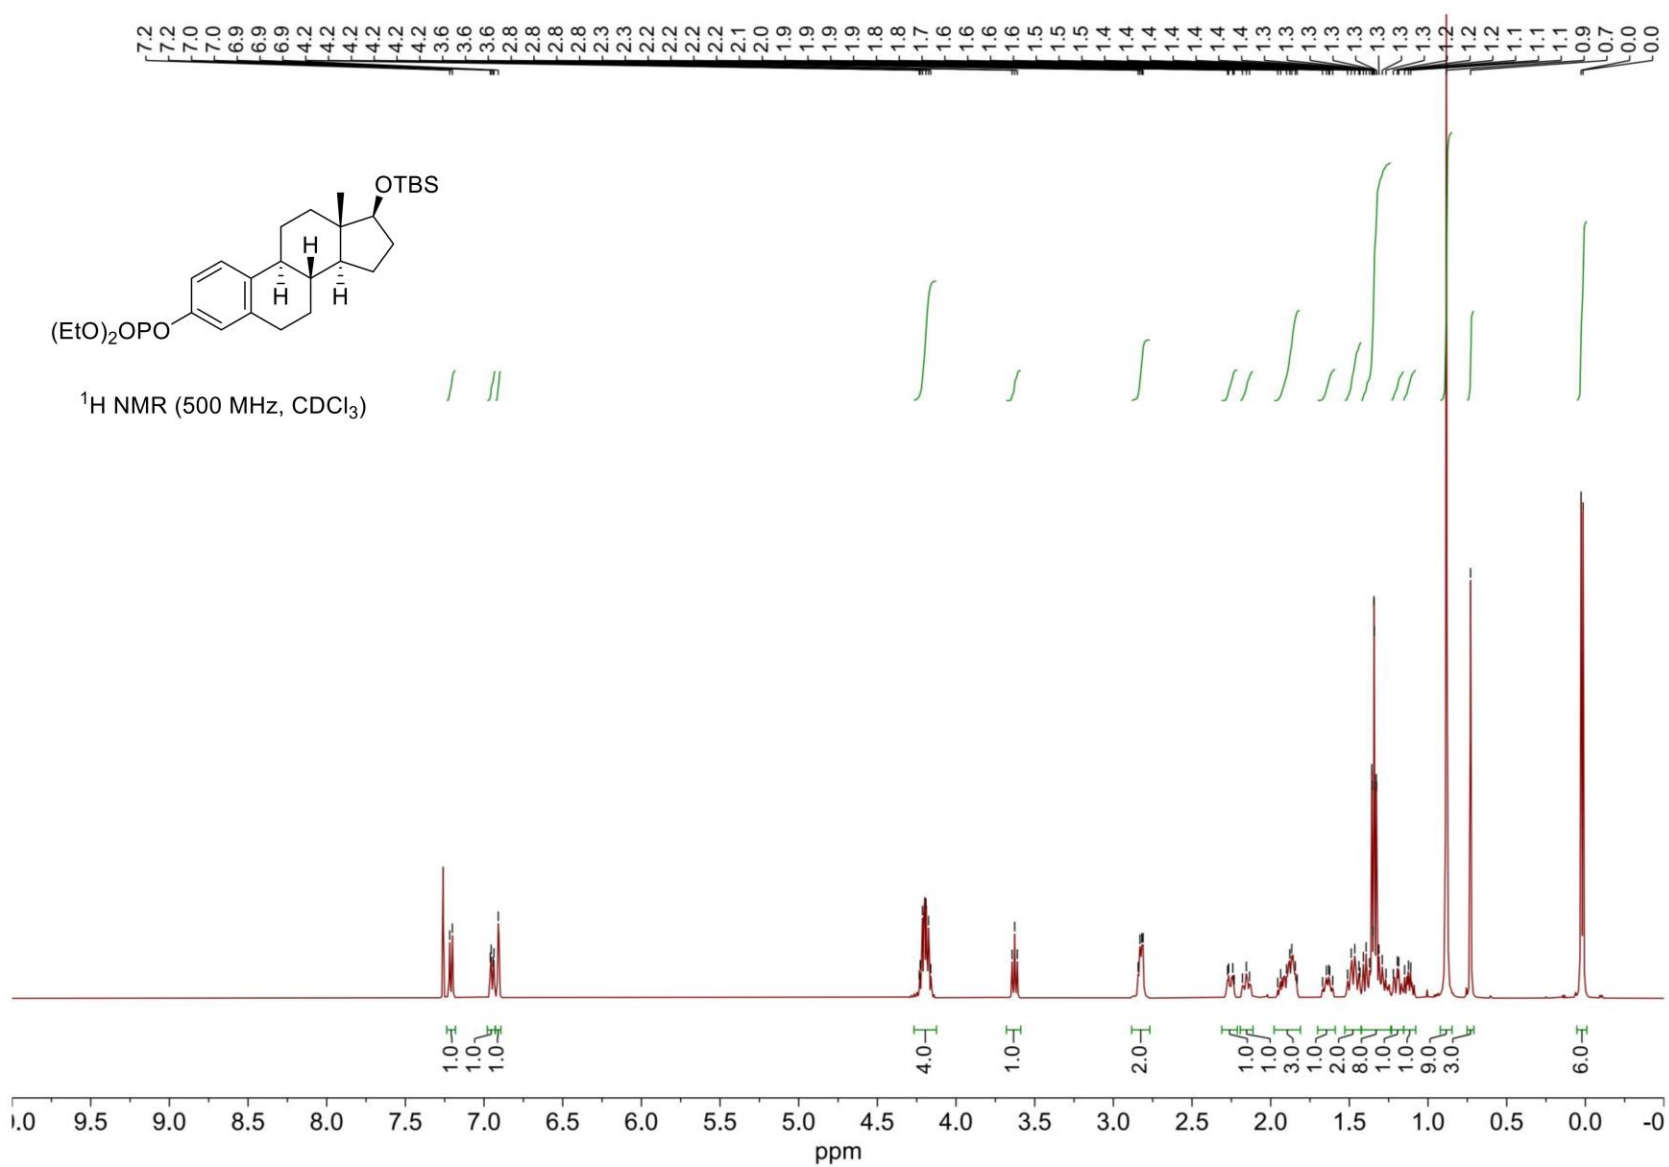

S247

**(8R,9S,13S,14S,17S)-17-((*tert*-Butyldimethylsilyl)oxy)-13-methyl-7,8,9,11,12,13,14,15,16,17-decahydro-6H-cyclopenta[a]phenanthren-3-yl diethyl phosphate (S15)**

148.5  
148.5  
138.6  
137.3  
126.6  
119.9  
119.8  
117.0  
117.0  
81.8  
77.4  
64.5  
64.4  
49.7  
44.2  
43.6  
38.6  
37.2  
31.0  
29.7  
27.1  
26.3  
25.9  
23.3  
18.1  
16.2  
16.1  
11.4  
4.4  
4.7

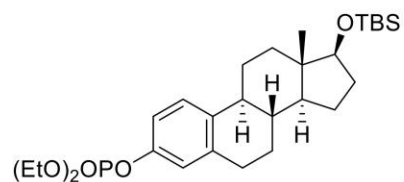

<sup>13</sup>C NMR (125 MHz, CDCl<sub>3</sub>)

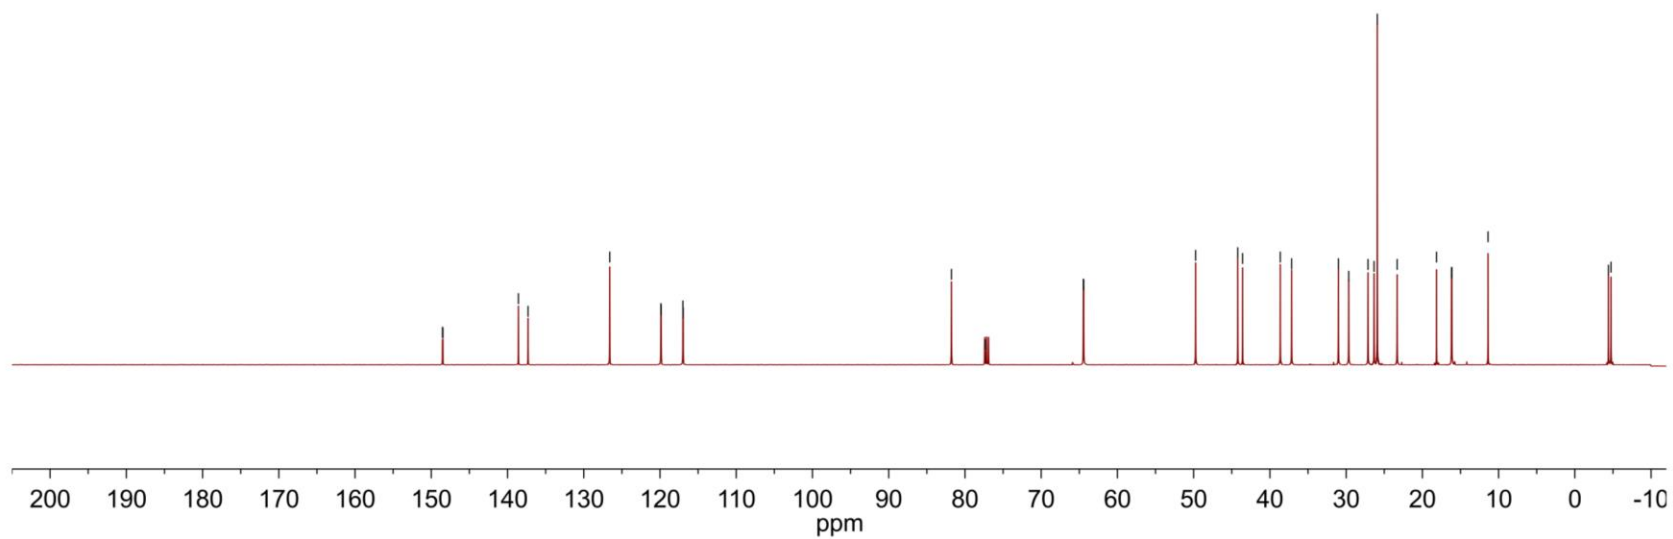

S248



# Ethyl (S)-2-acetamido-3-(4-((diethoxyphosphoryl)oxy)phenyl)propanoate (S16)

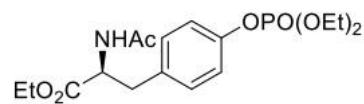

<sup>1</sup>H NMR (500 MHz, CDCl<sub>3</sub>)

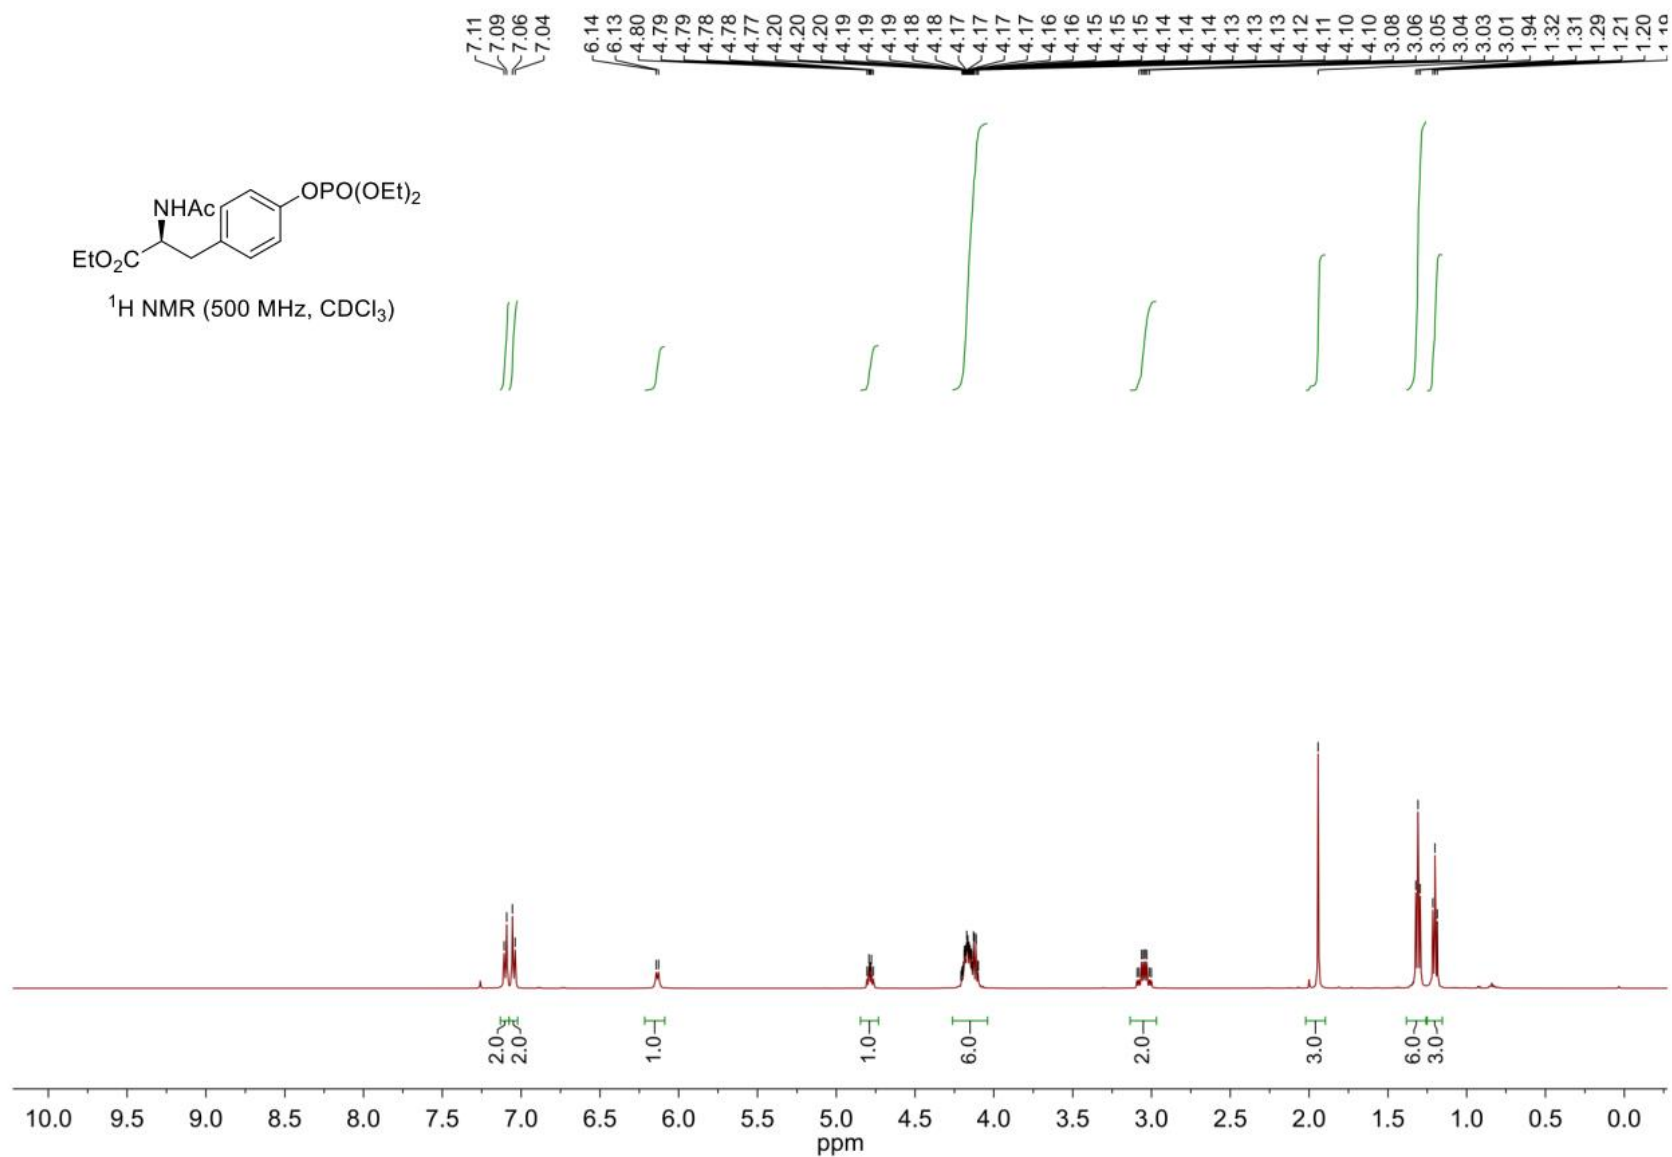

# Ethyl (S)-2-acetamido-3-(4-((diethoxyphosphoryl)oxy)phenyl)propanoate (S16)

171.8  
170.0  
150.2  
150.1  
133.1  
130.9  
120.3  
120.3  
64.9  
64.9  
61.9  
53.5  
37.4  
23.4  
16.4  
16.4  
14.4

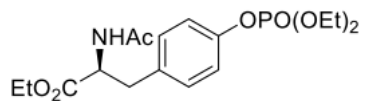

$^{13}\text{C}$  NMR (125 MHz,  $\text{CDCl}_3$ )

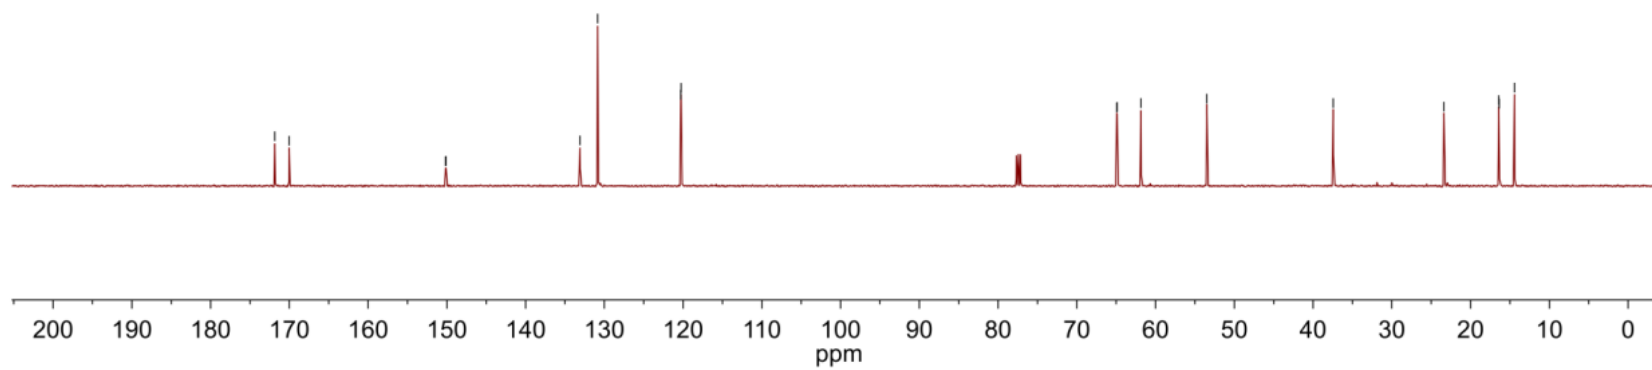

S250

# Diethyl (4-((2-morpholinoethyl)carbamoyl)phenyl) phosphate (S17)

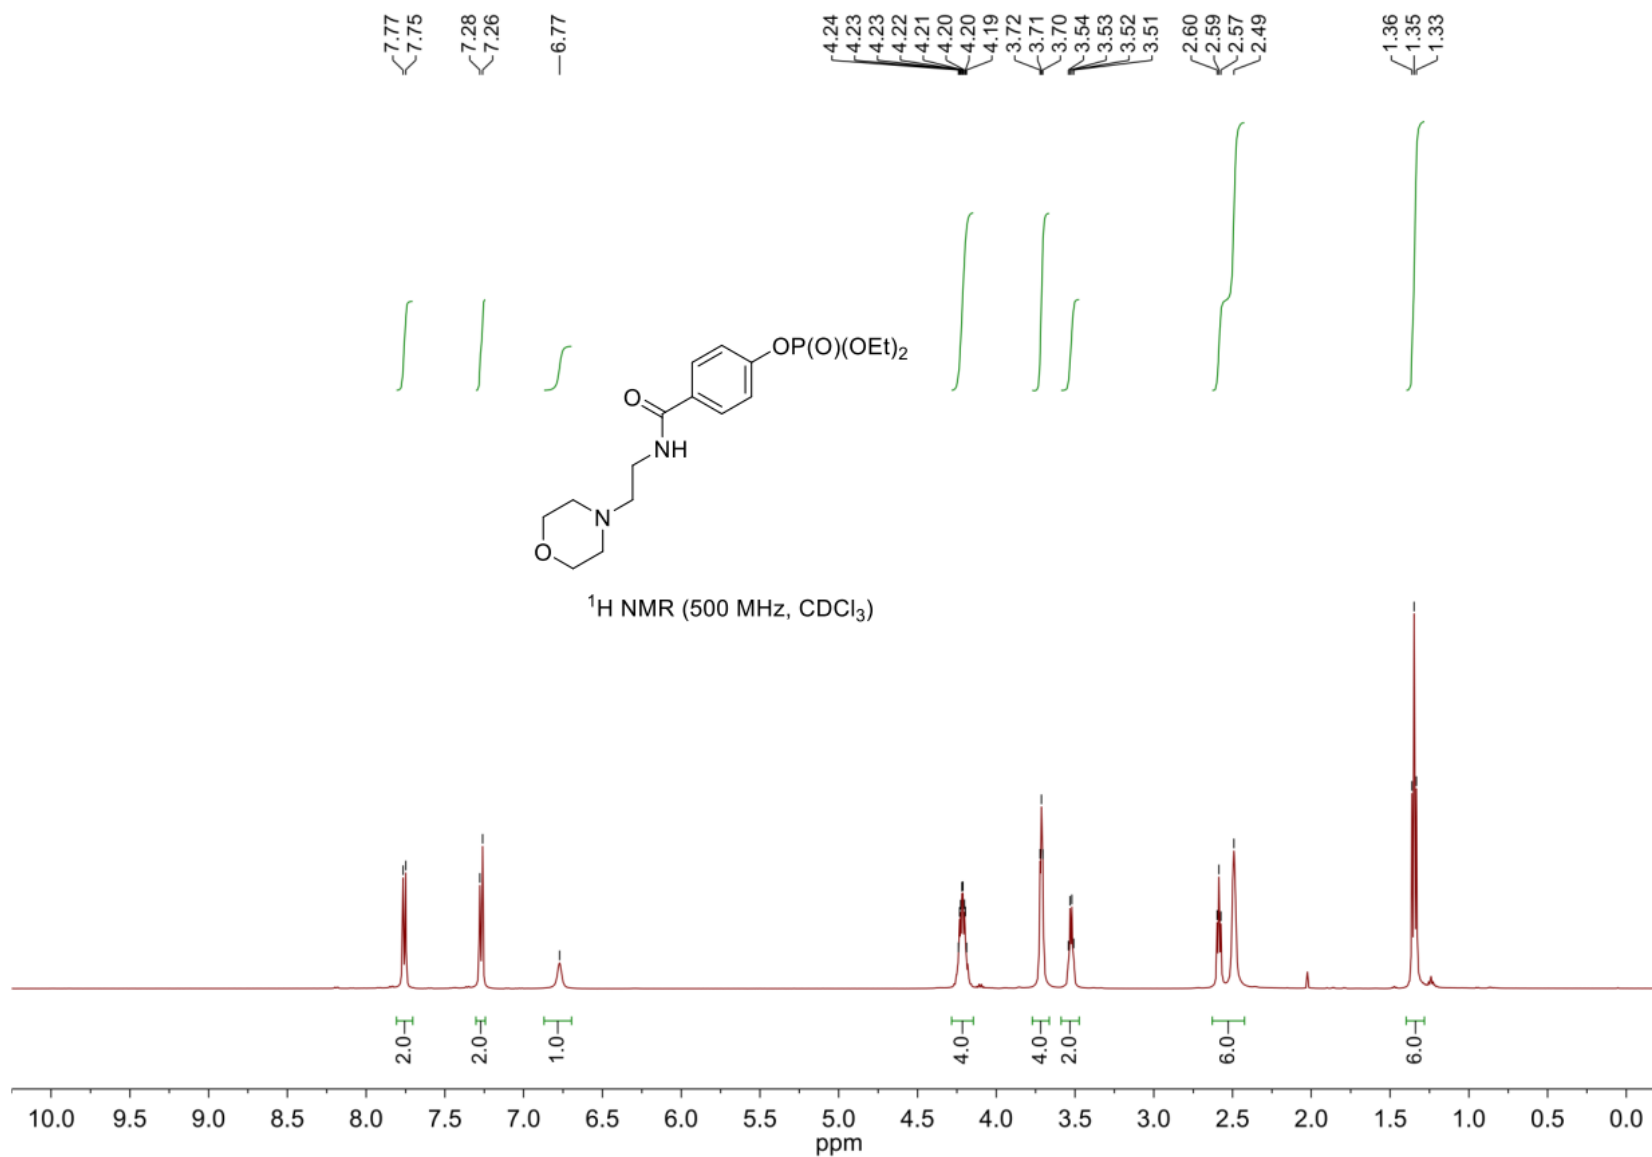

# Diethyl (4-((2-morpholinoethyl)carbamoyl)phenyl) phosphate (S17)

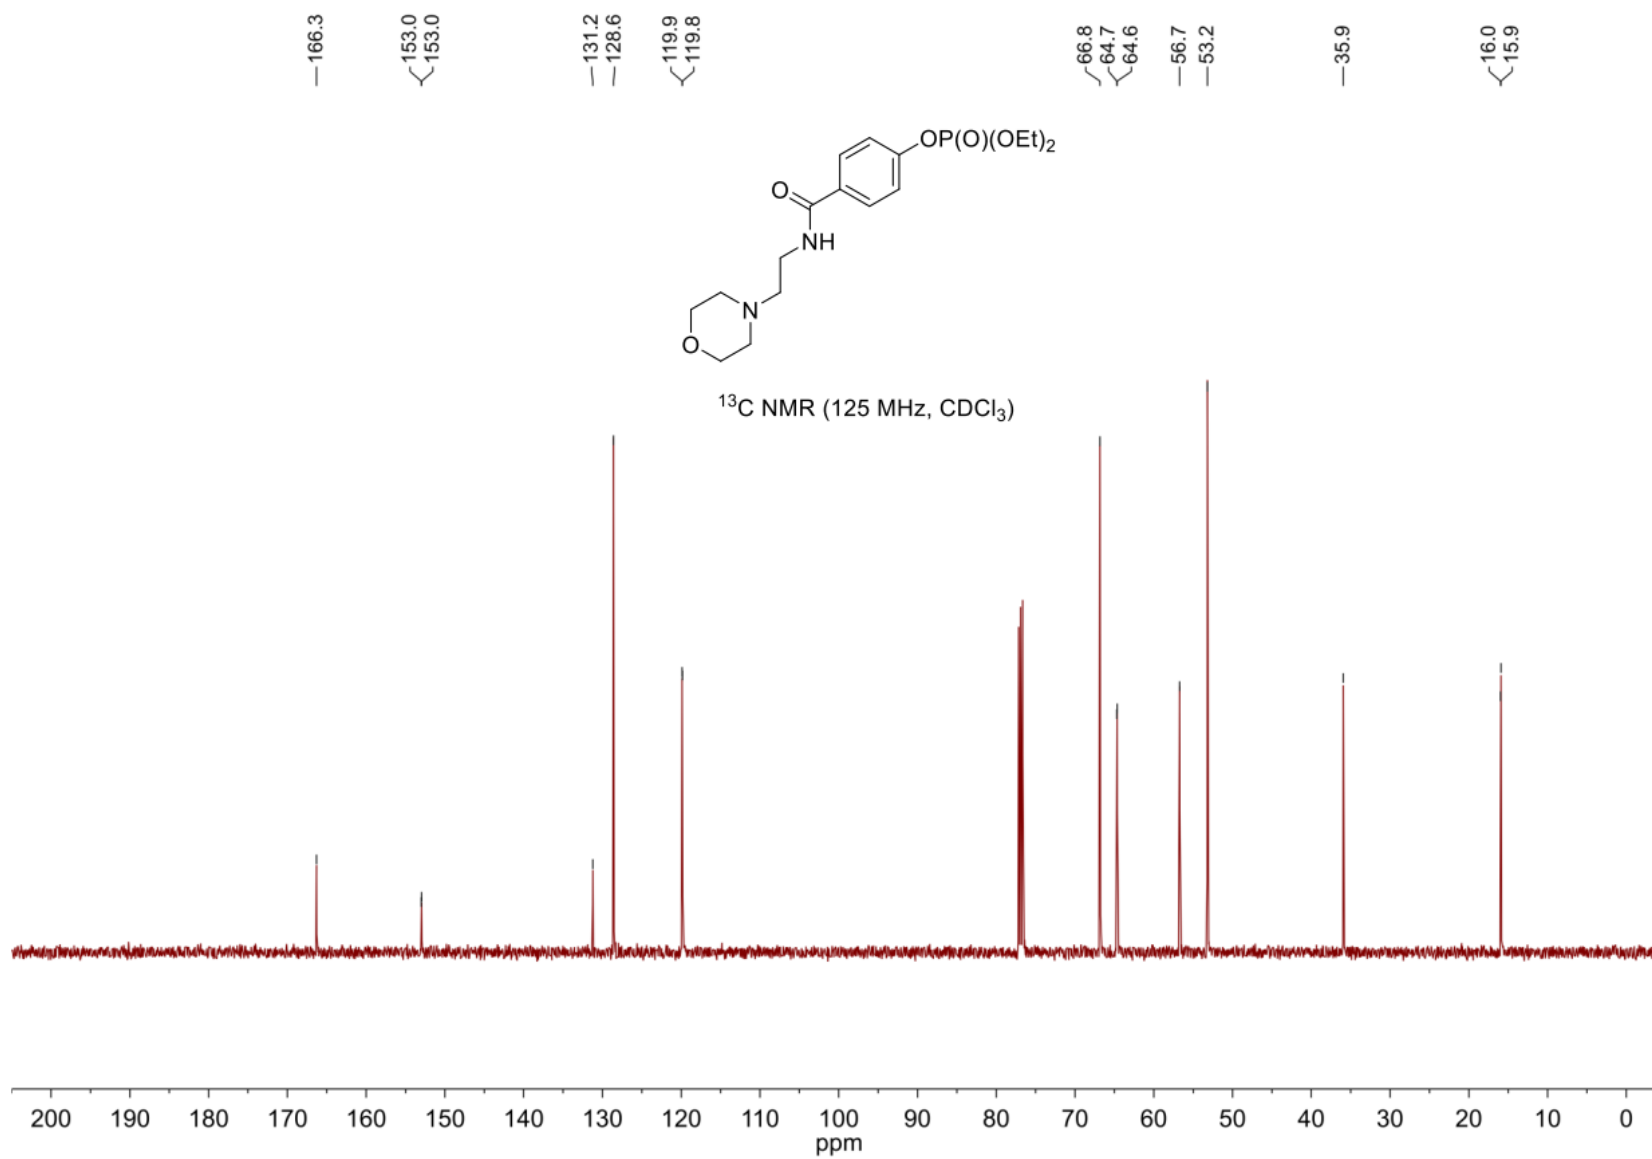

S252

# 1-Methyl-1-phenylpyrrolidin-1-ium trifluoromethanesulfonate (S18)

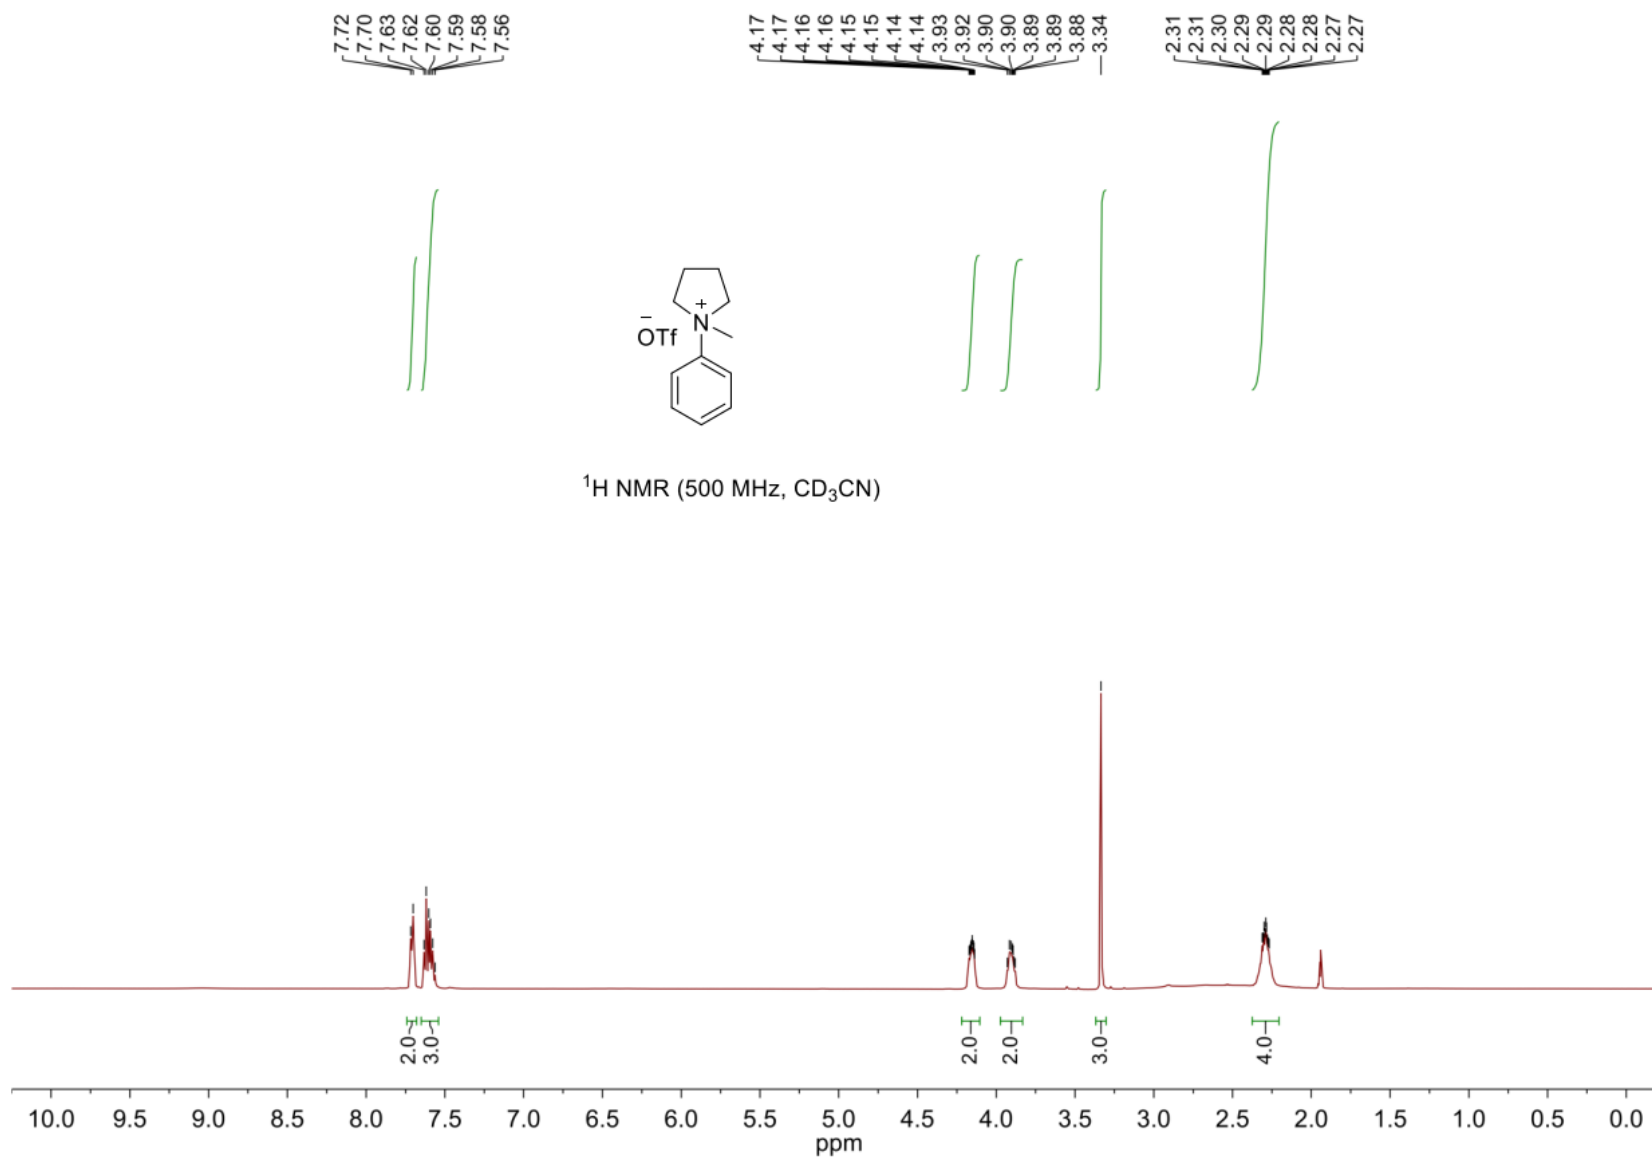

S253

# 1-Methyl-1-phenylpyrrolidin-1-ium trifluoromethanesulfonate (S18)

131.3  
123.8  
123.2  
122.3  
121.8  
121.5  
120.7

66.9

55.6

21.4

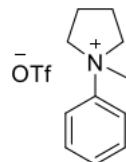

$^{13}\text{C}$  NMR (125 MHz,  $\text{CD}_3\text{CN}$ )

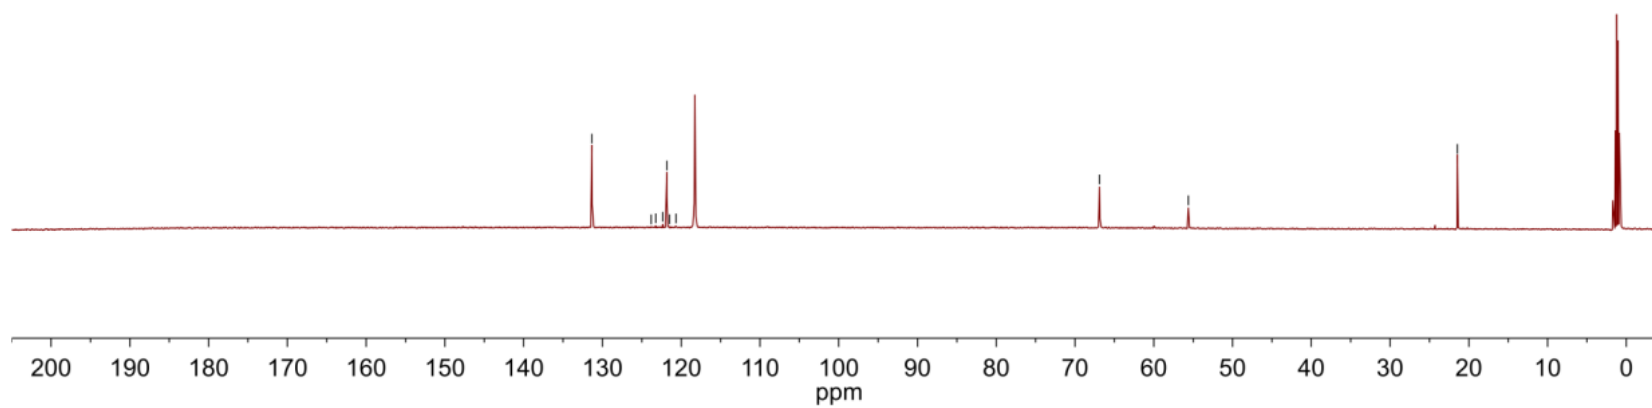

S254

### 3-Ethyl-*N,N,N*-trimethylbenzenaminium (S19)

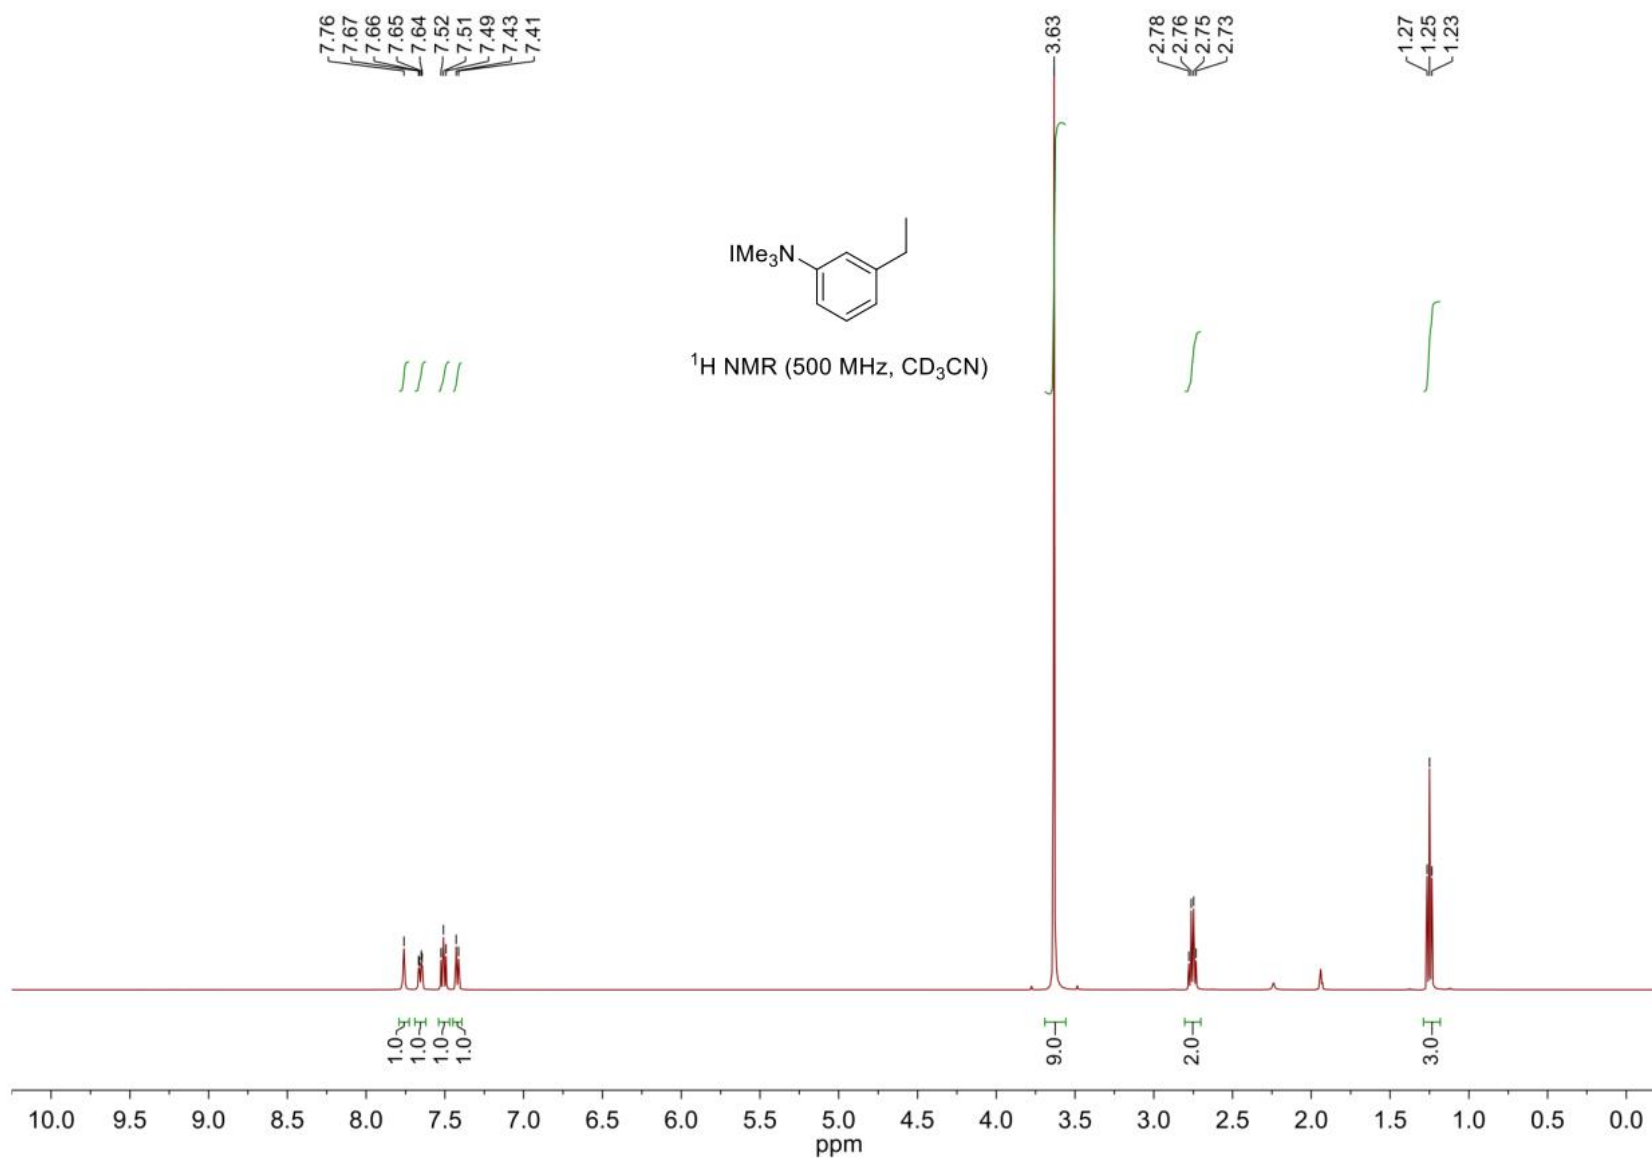

S255

### 3-Ethyl-*N,N,N*-trimethylbenzenaminium (S19)

—148.3      <—131.0  
                 <—130.8      —120.7  
                                 —118.1      —58.0      —29.3      —15.8

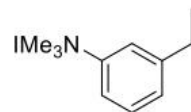

<sup>13</sup>C NMR (125 MHz, CD<sub>3</sub>CN)

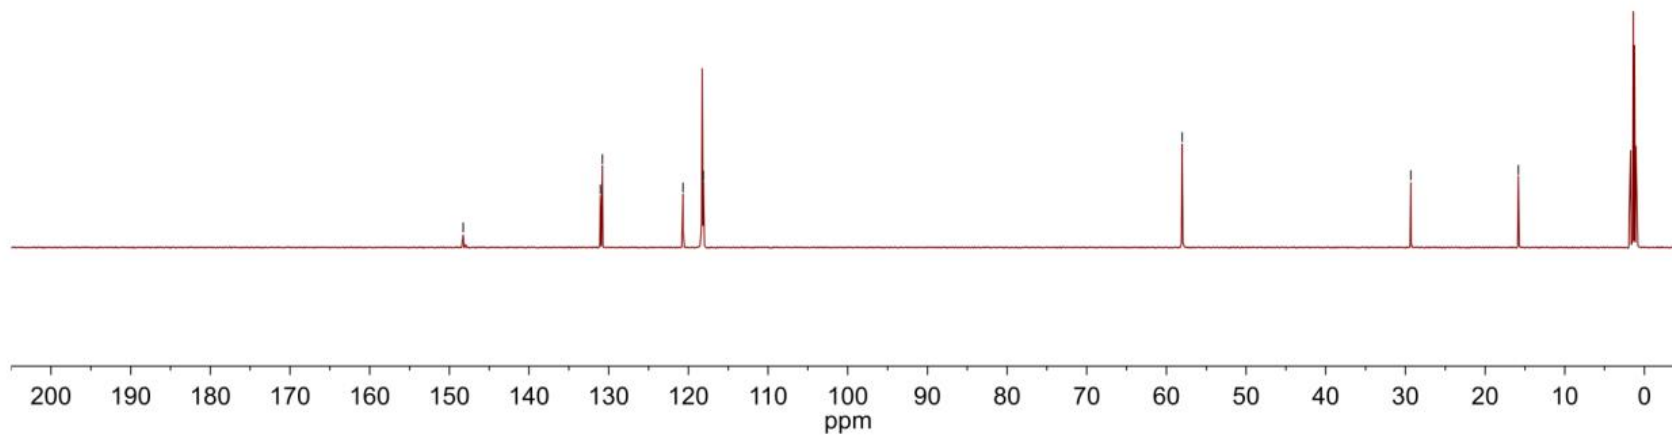



*N,N,N*-Trimethyl-3-(methylsulfonyl)benzenaminium trifluoromethanesulfonate (S20)

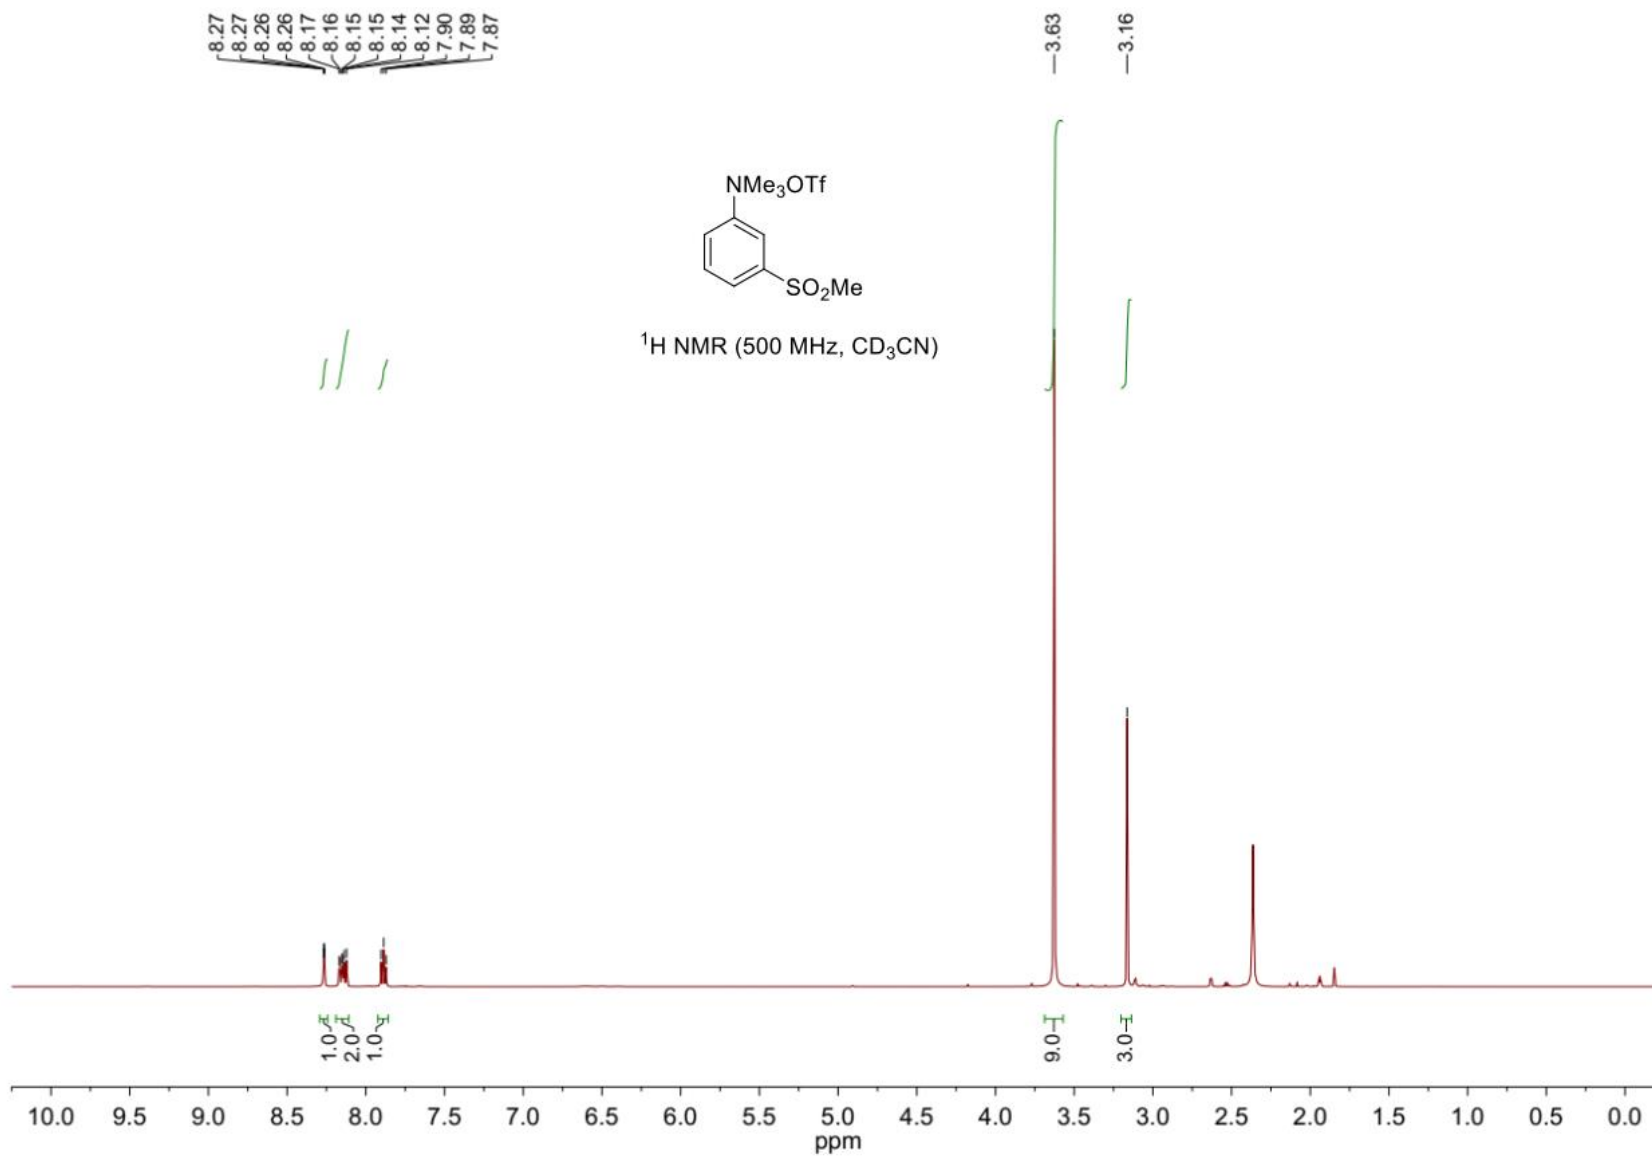

S257

*N,N,N*-Trimethyl-3-(methylsulfonyl)benzenaminium trifluoromethanesulfonate (S20)

—148.0  
—143.7  
132.8  
130.3  
126.6  
125.6  
123.1  
120.5  
120.4  
118.0  
—58.0  
—44.2

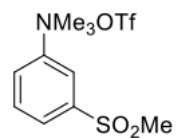

<sup>13</sup>C NMR (125 MHz, CD<sub>3</sub>CN)

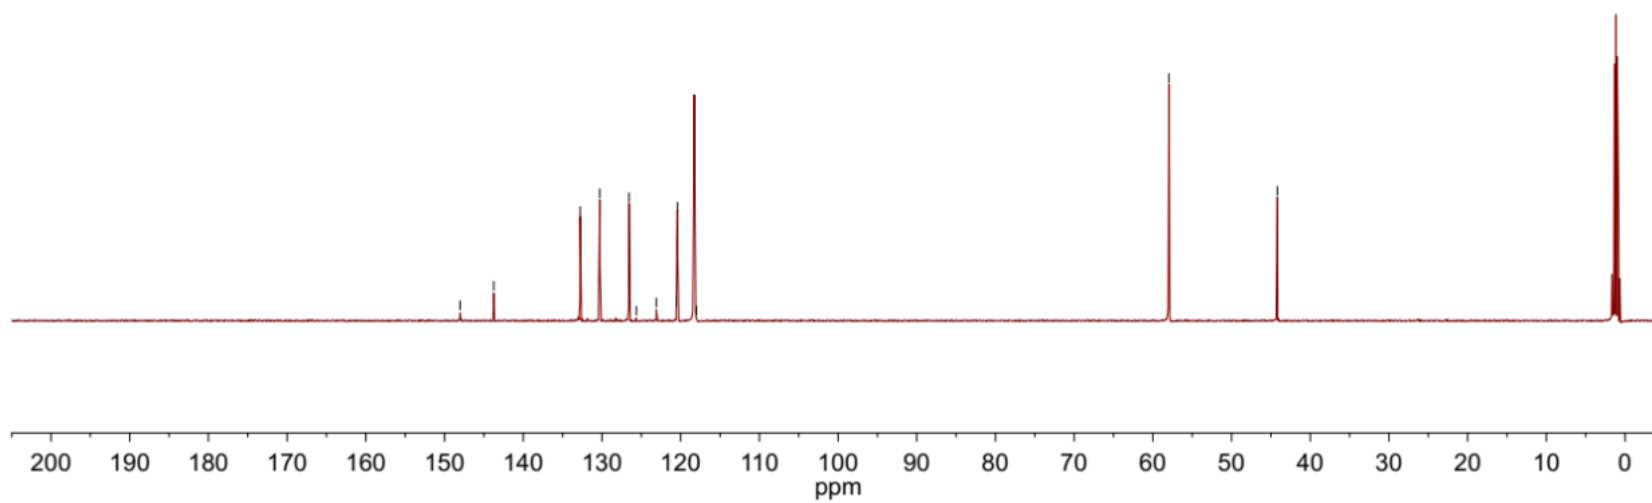

S258

*N,N,N*-Trimethyl-1*H*-indol-4-aminium trifluoromethanesulfonate (S21)

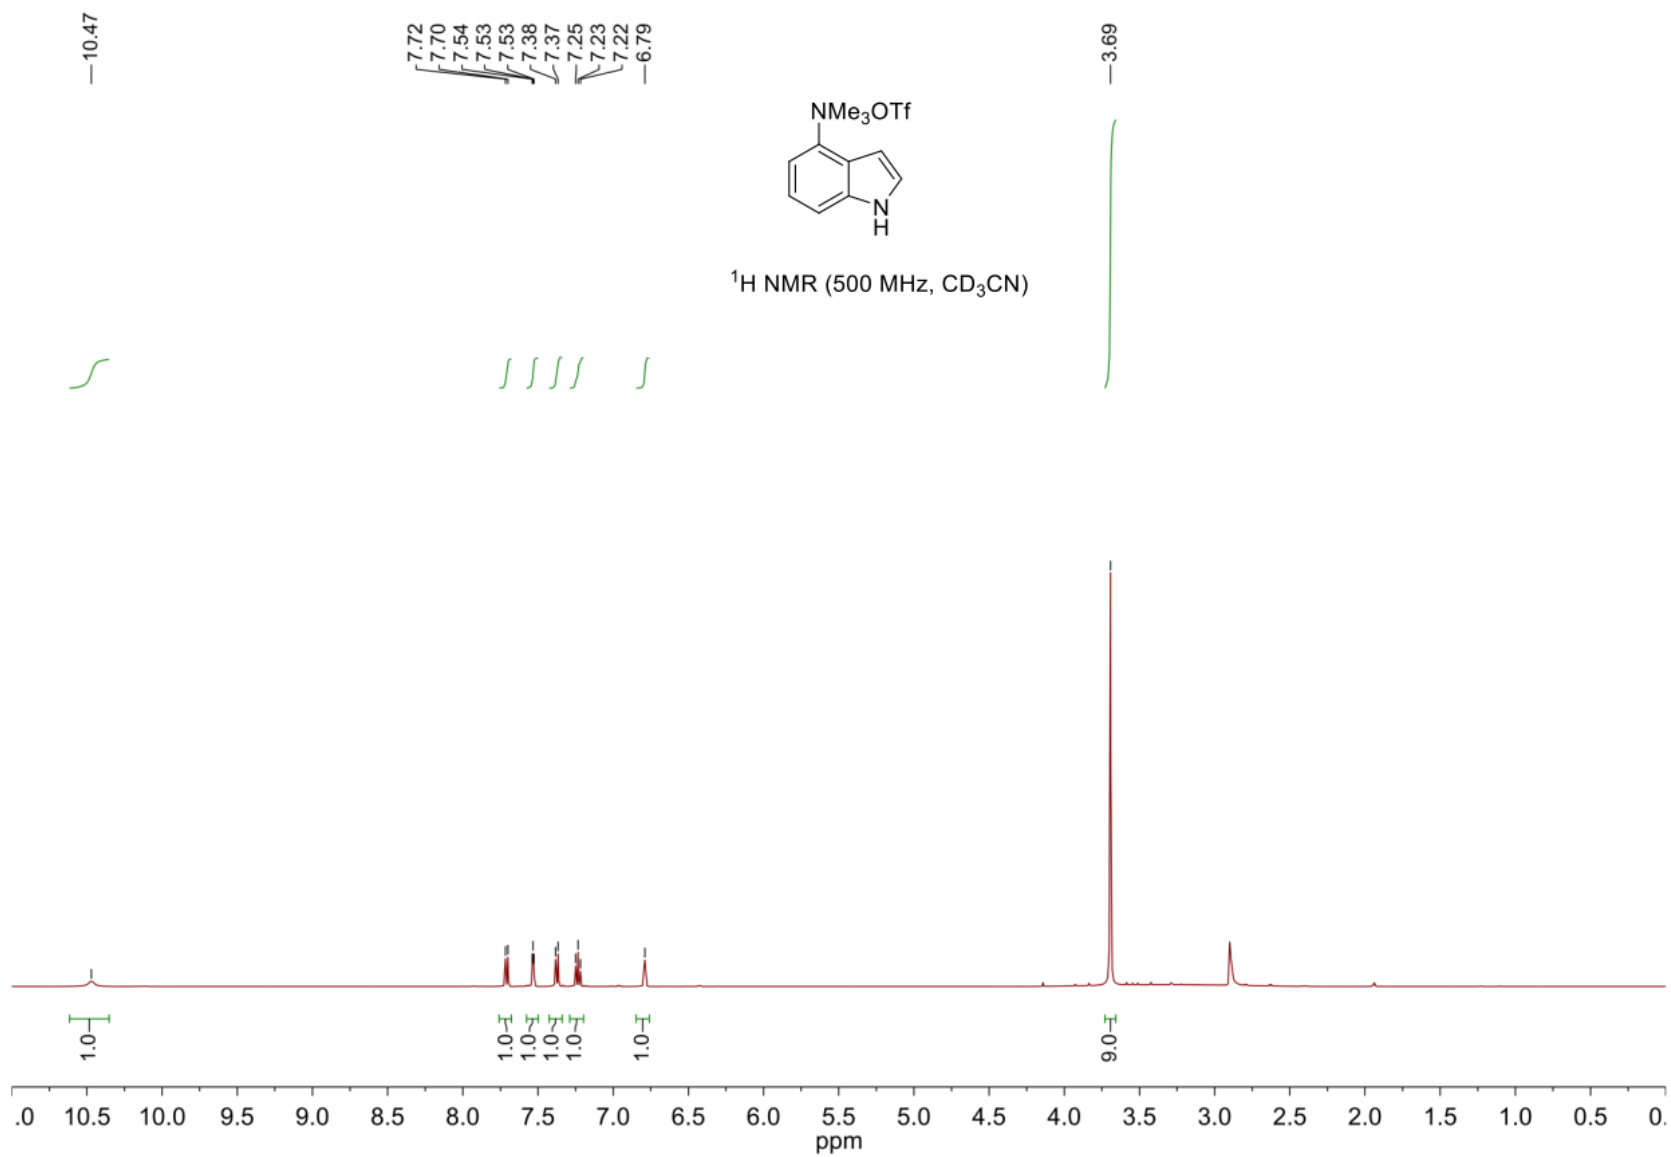

S259

***N,N,N*-Trimethyl-1*H*-indol-4-aminium trifluoromethanesulfonate (S21)**

139.2  
138.7  
128.1  
125.1  
122.5  
121.6  
120.0  
118.4  
117.5  
115.6  
111.2  
100.4  
56.4

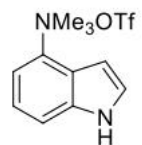

<sup>13</sup>C NMR (125 MHz, CD<sub>3</sub>CN)

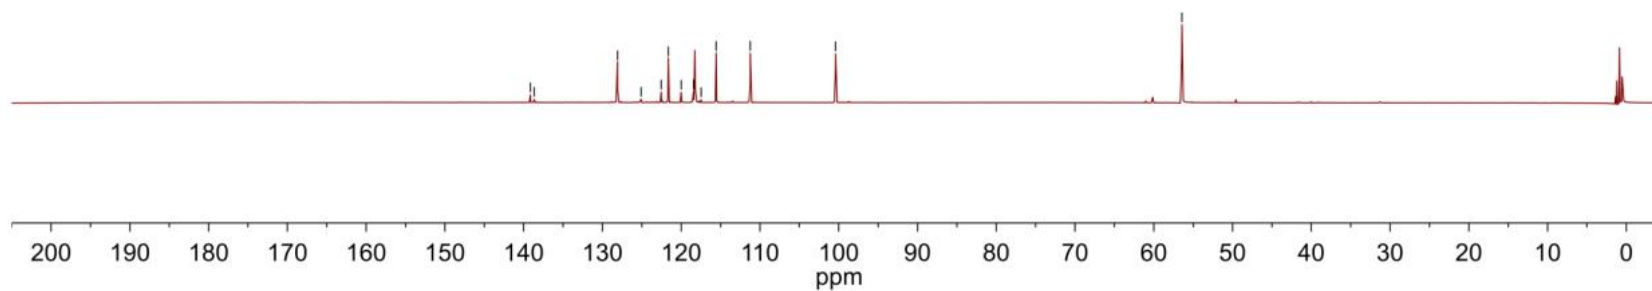

S260

4-(Indoline-1-carbonyl)-*N,N,N*-trimethylbenzenaminium trifluoromethanesulfonate (S22)

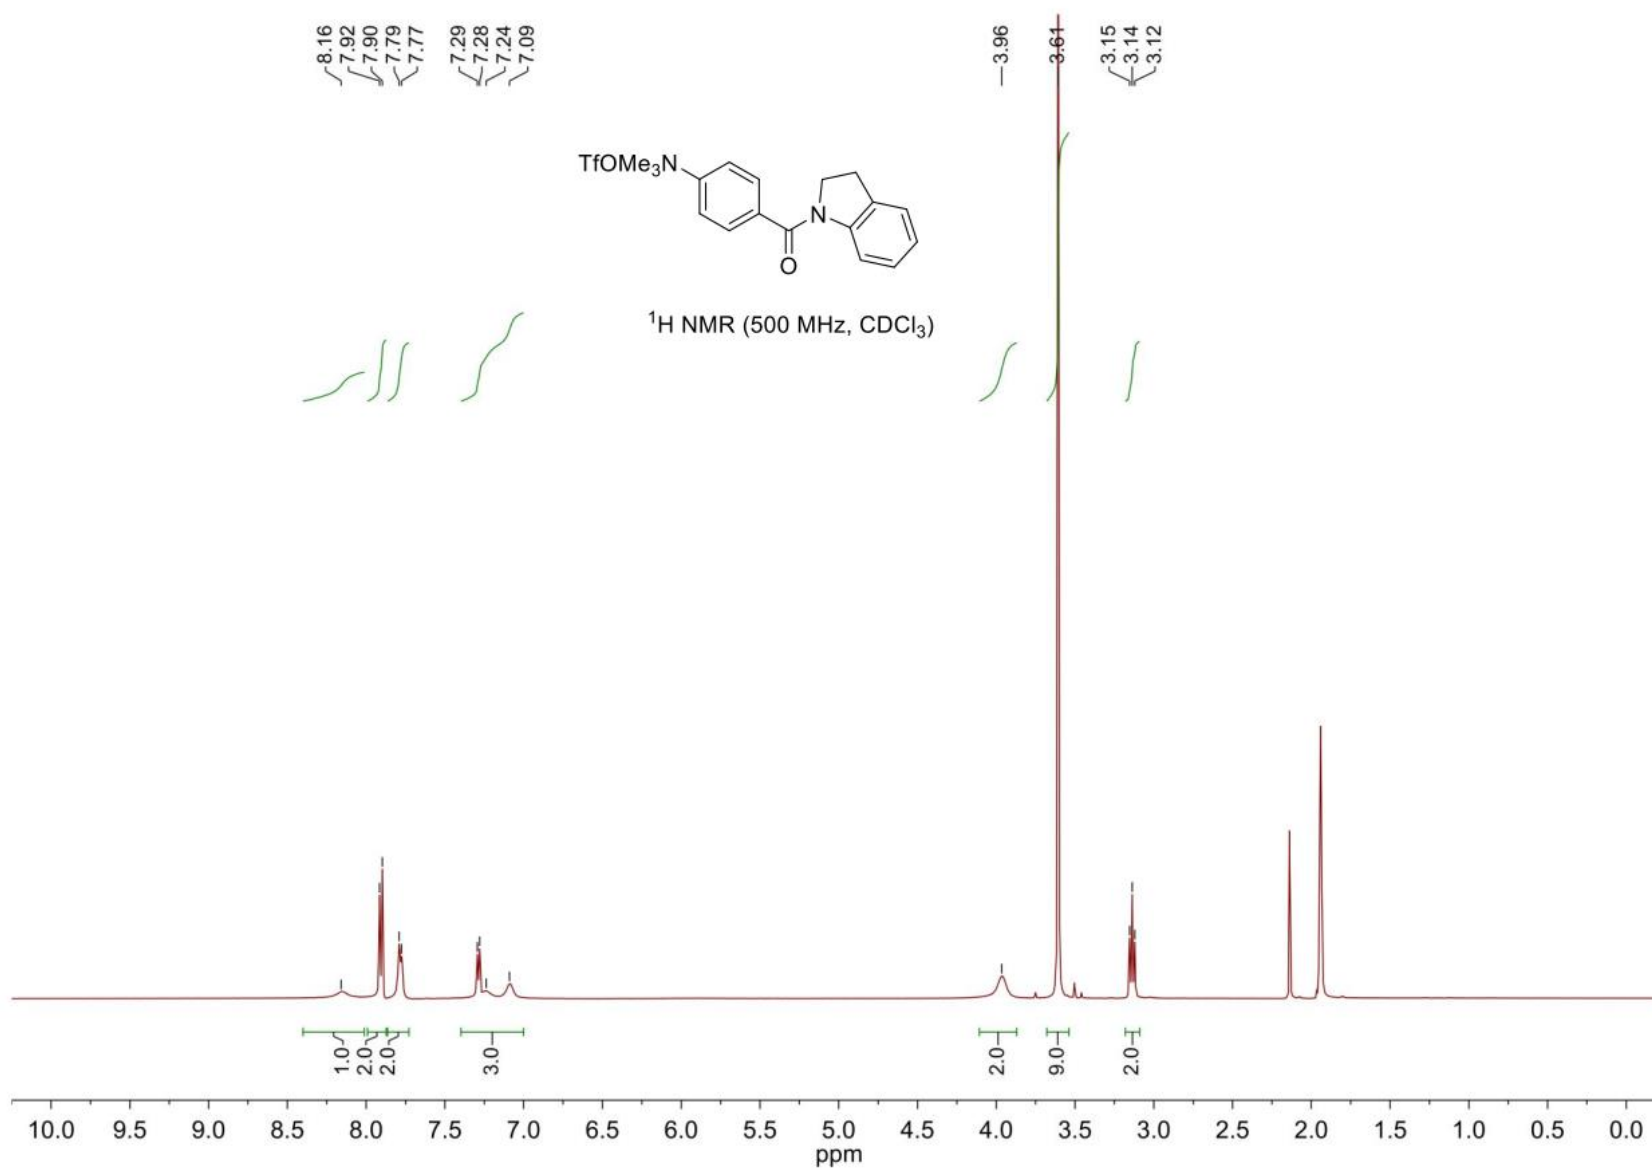

S261

# 4-(Indoline-1-carbonyl)-*N,N,N*-trimethylbenzenaminium trifluoromethanesulfonate (S22)

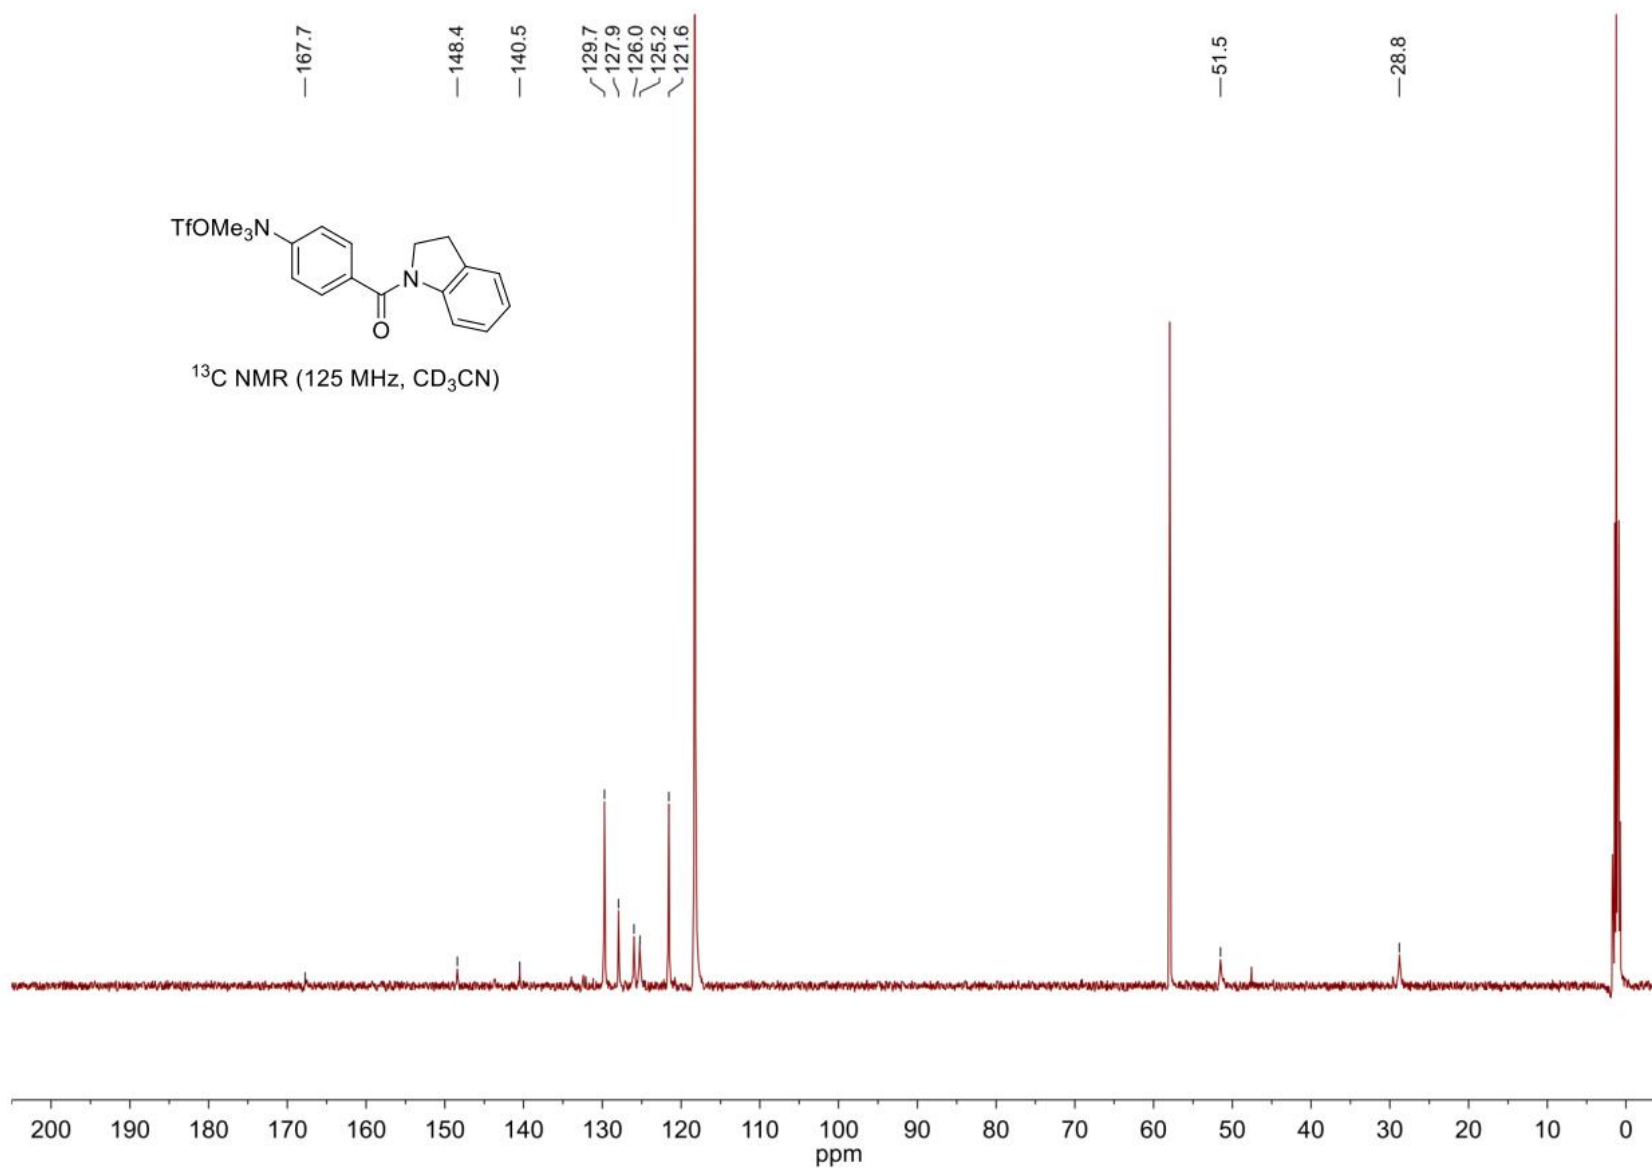

***N,N,N*-Trimethyl-3-((thiophen-2-ylmethyl)carbamoyl)benzenaminium trifluoromethanesulfonate (S23)**

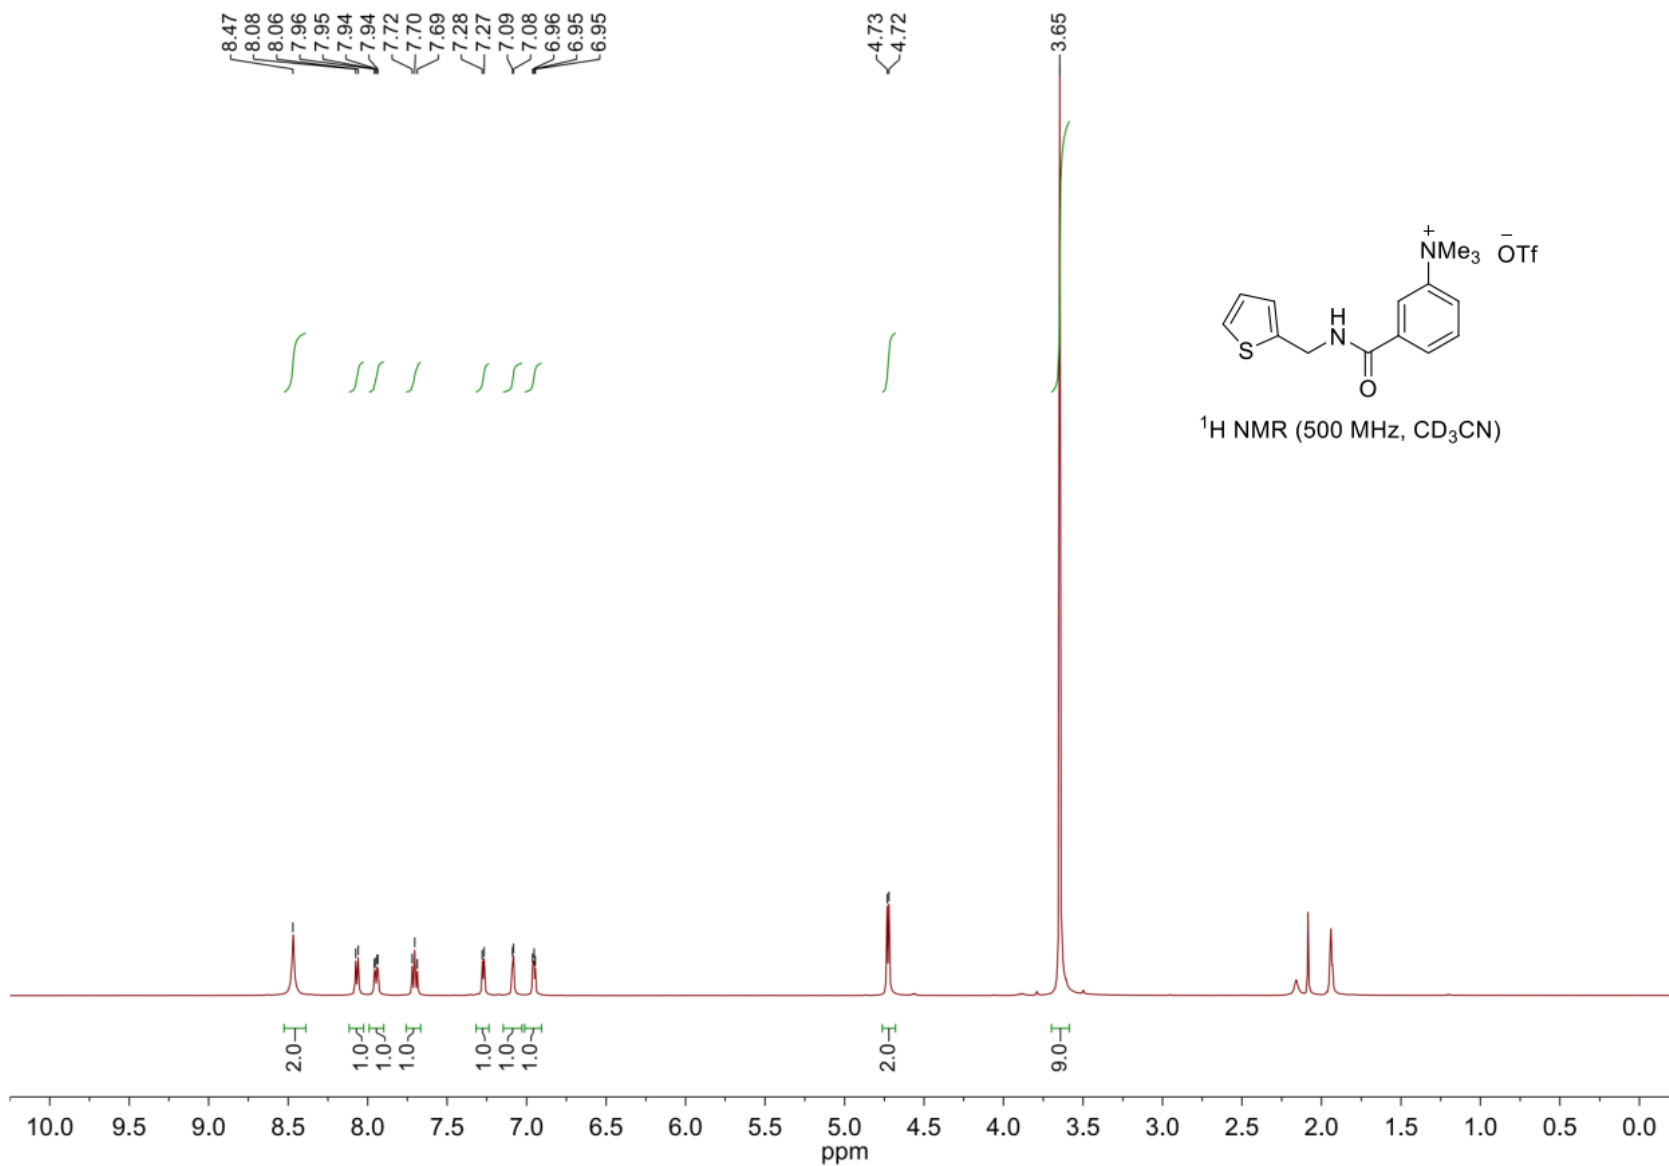

S263

***N,N,N*-Trimethyl-3-((thiophen-2-ylmethyl)carbamoyl)benzenaminium trifluoromethanesulfonate (S23)**

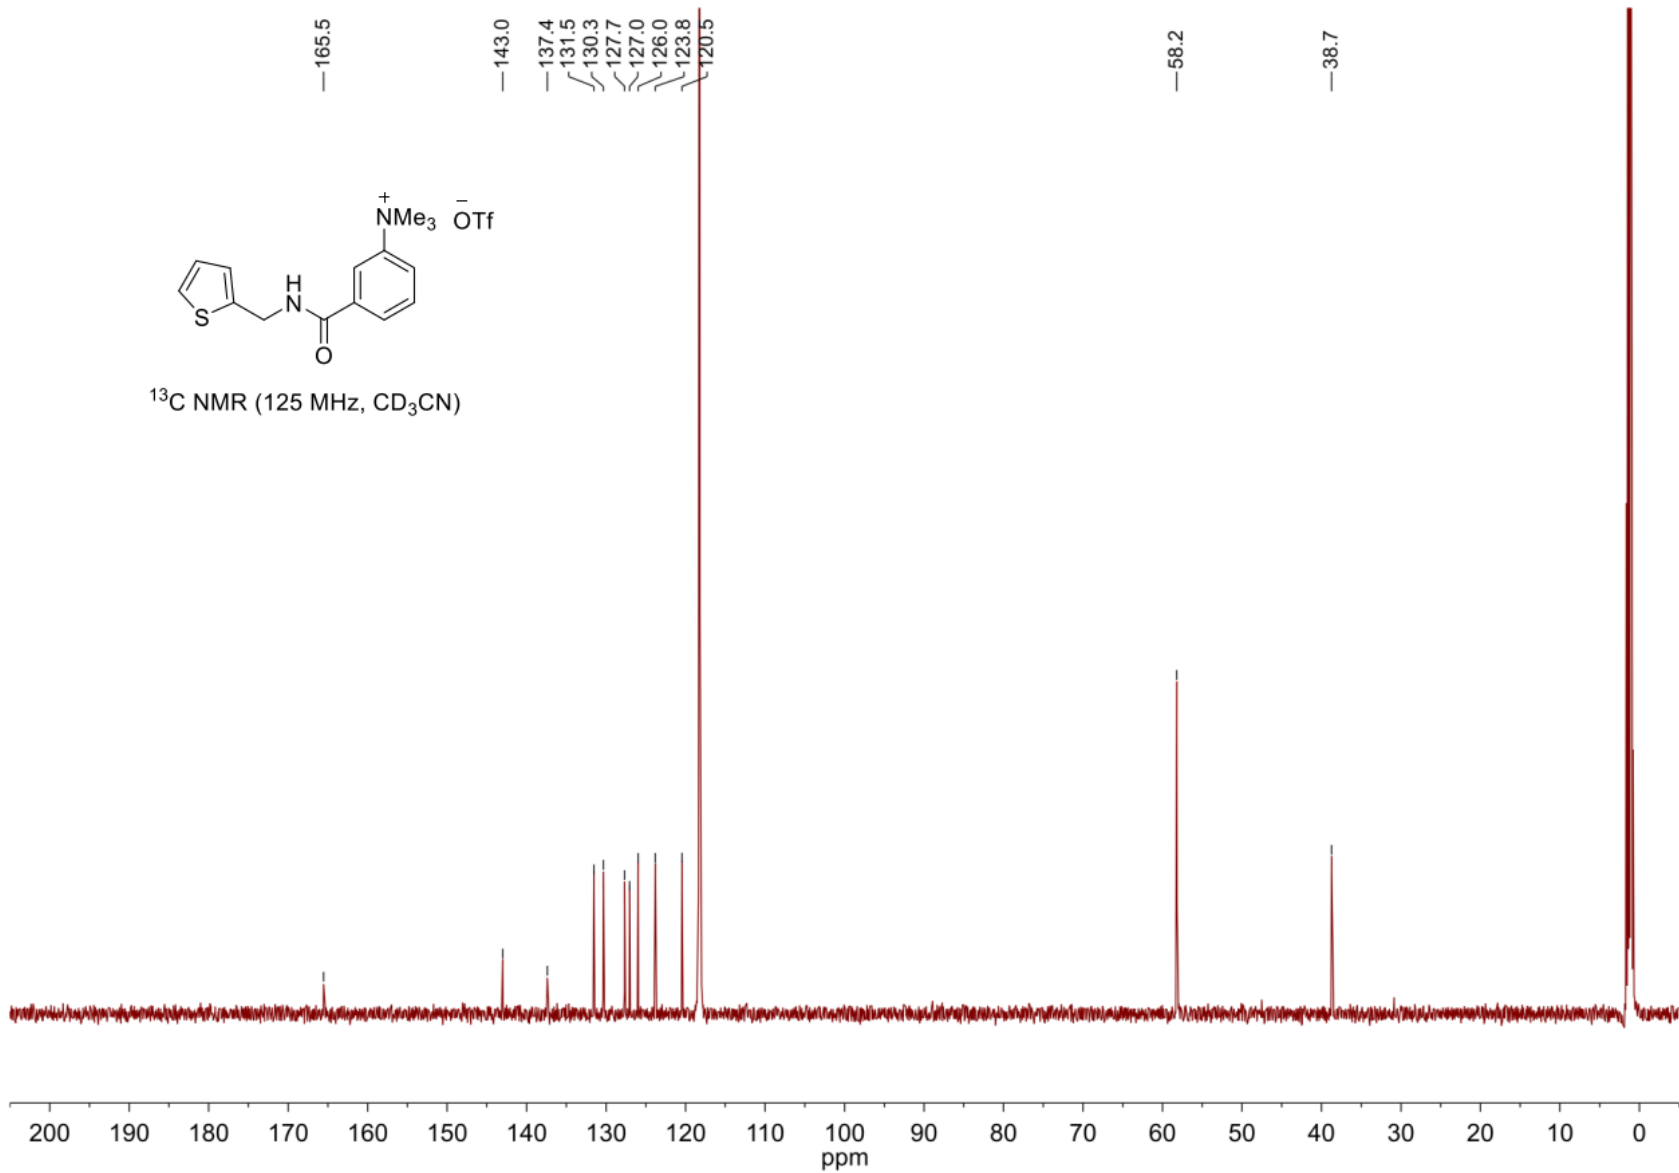



# 4-(3-Ethyl-2,6-dioxopiperidin-3-yl)-*N,N,N*-trimethylbenzenaminium trifluoromethanesulfonate (S24)

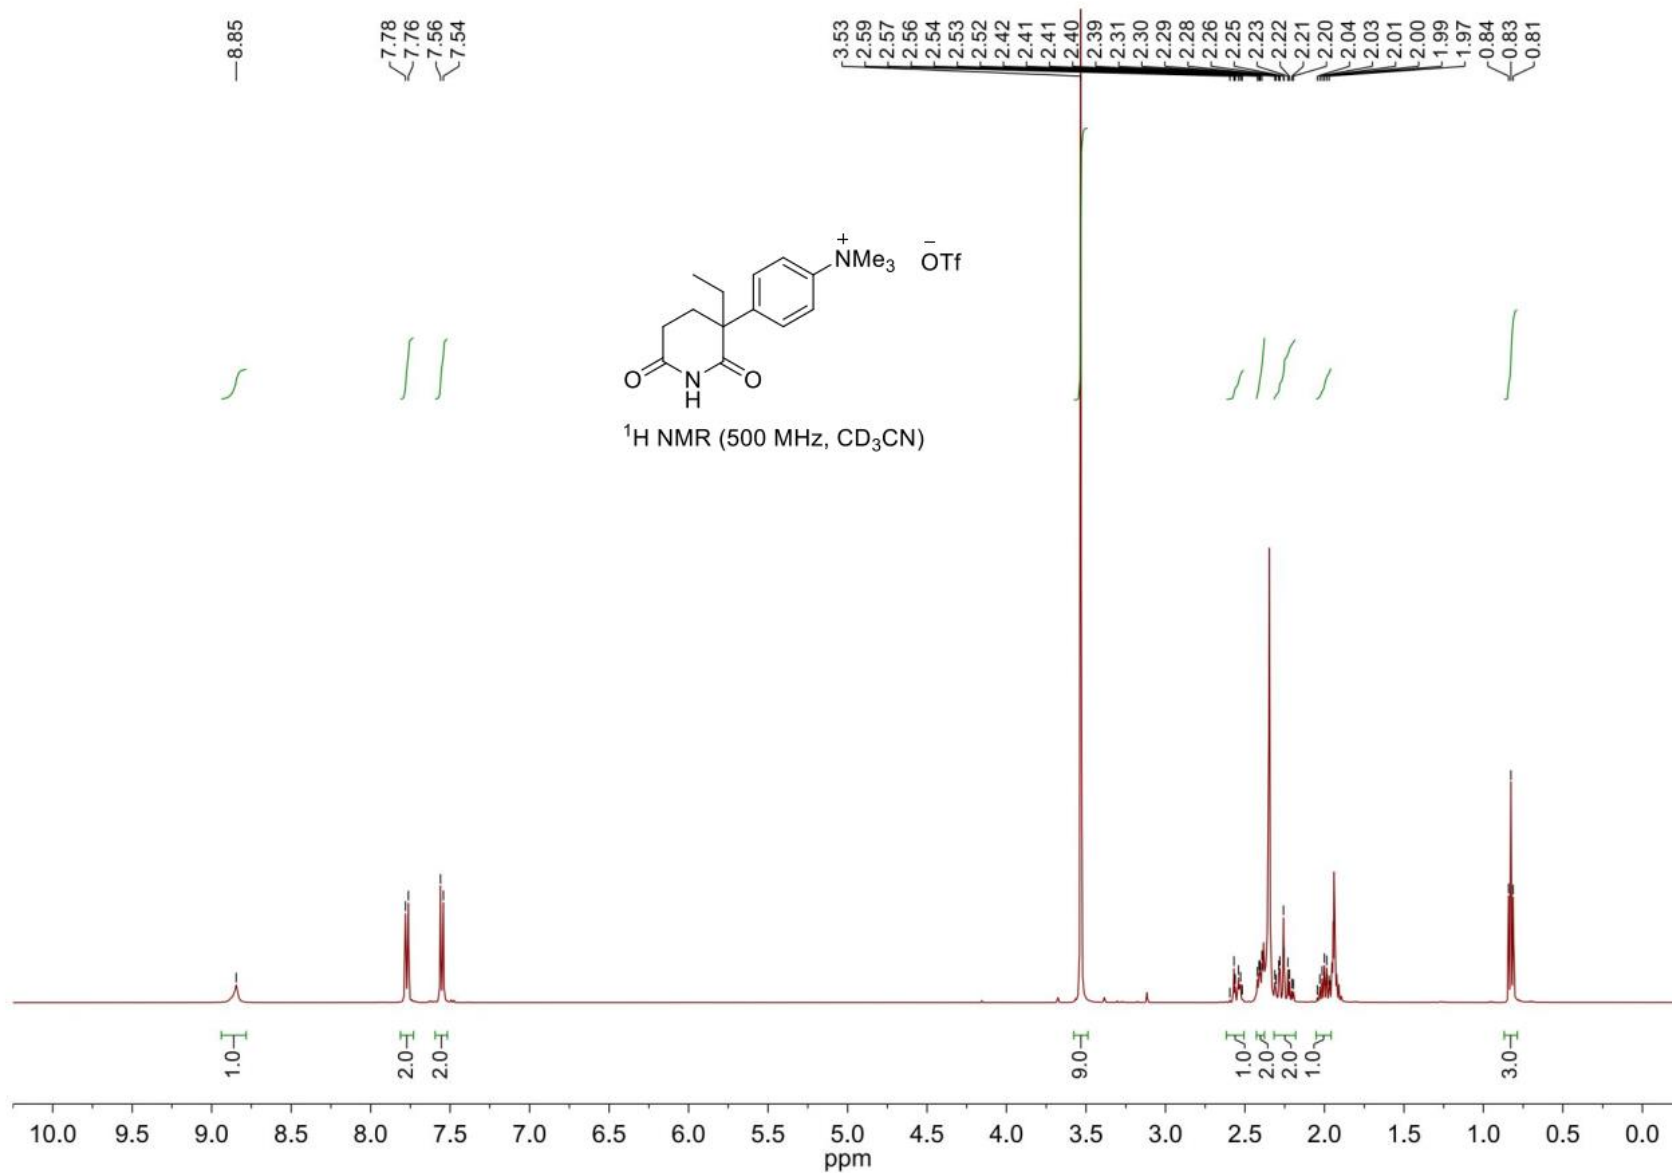

S265

# 4-(3-Ethyl-2,6-dioxopiperidin-3-yl)-*N,N,N*-trimethylbenzenaminium trifluoromethanesulfonate (S24)

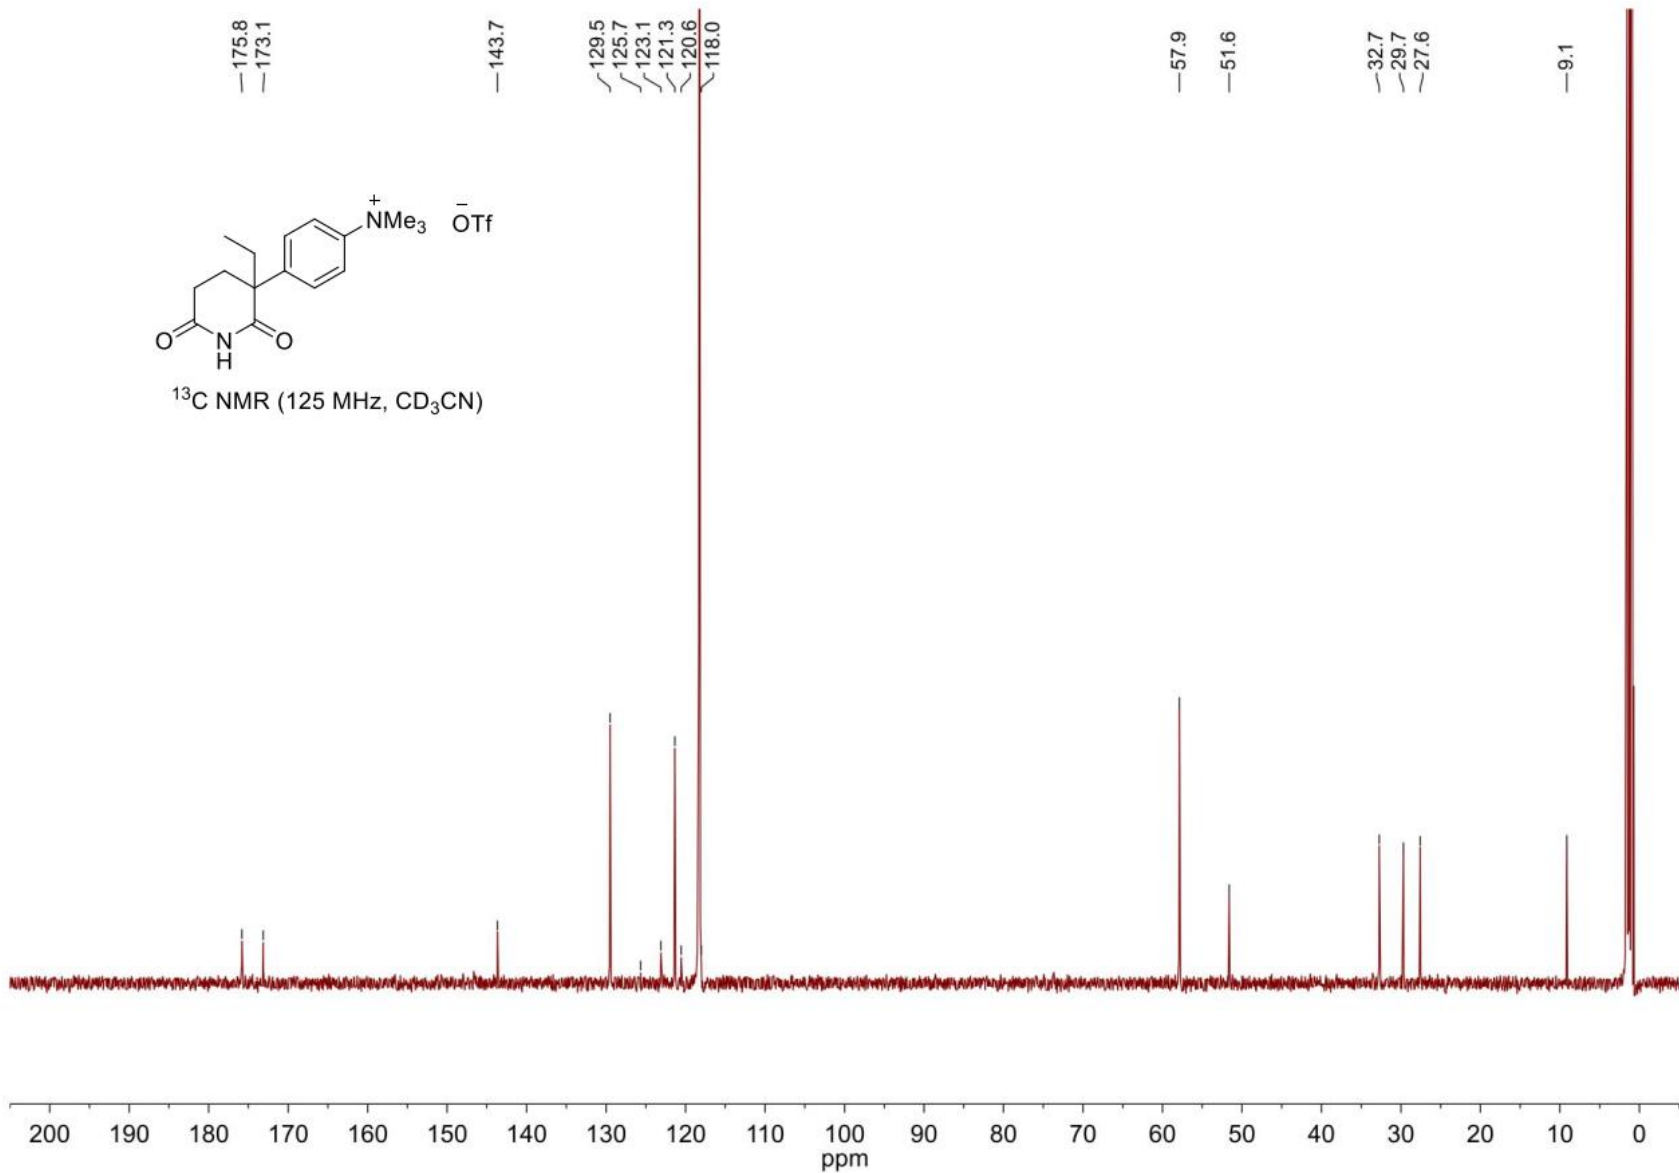

(2R,3R,4S,5R,6R)-4-(4-Iodo-2-(methoxymethyl)phenoxy)-2,3,5-trimethoxy-6-(methoxymethyl)tetrahydro-2H-pyran (S25)

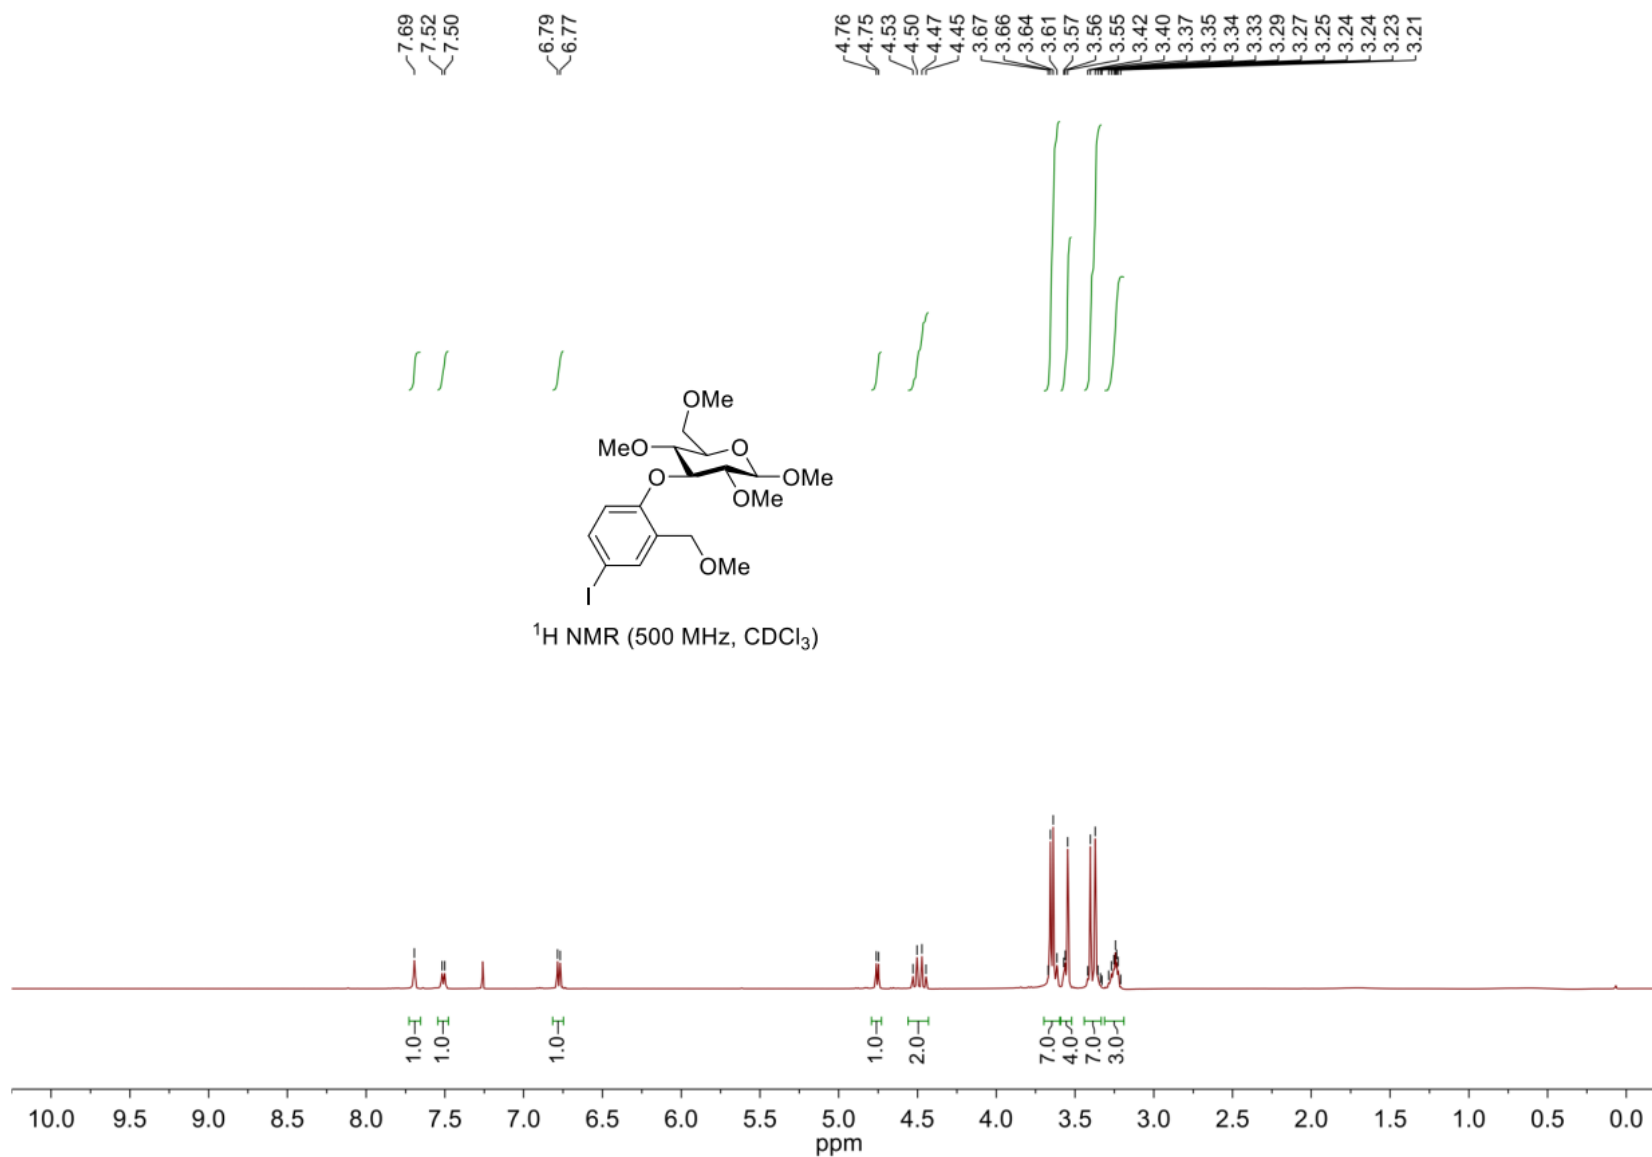

(2*R*,3*R*,4*S*,5*R*,6*R*)-4-(4-Iodo-2-(methoxymethyl)phenoxy)-2,3,5-trimethoxy-6-(methoxymethyl)tetrahydro-2*H*-pyran (S25)

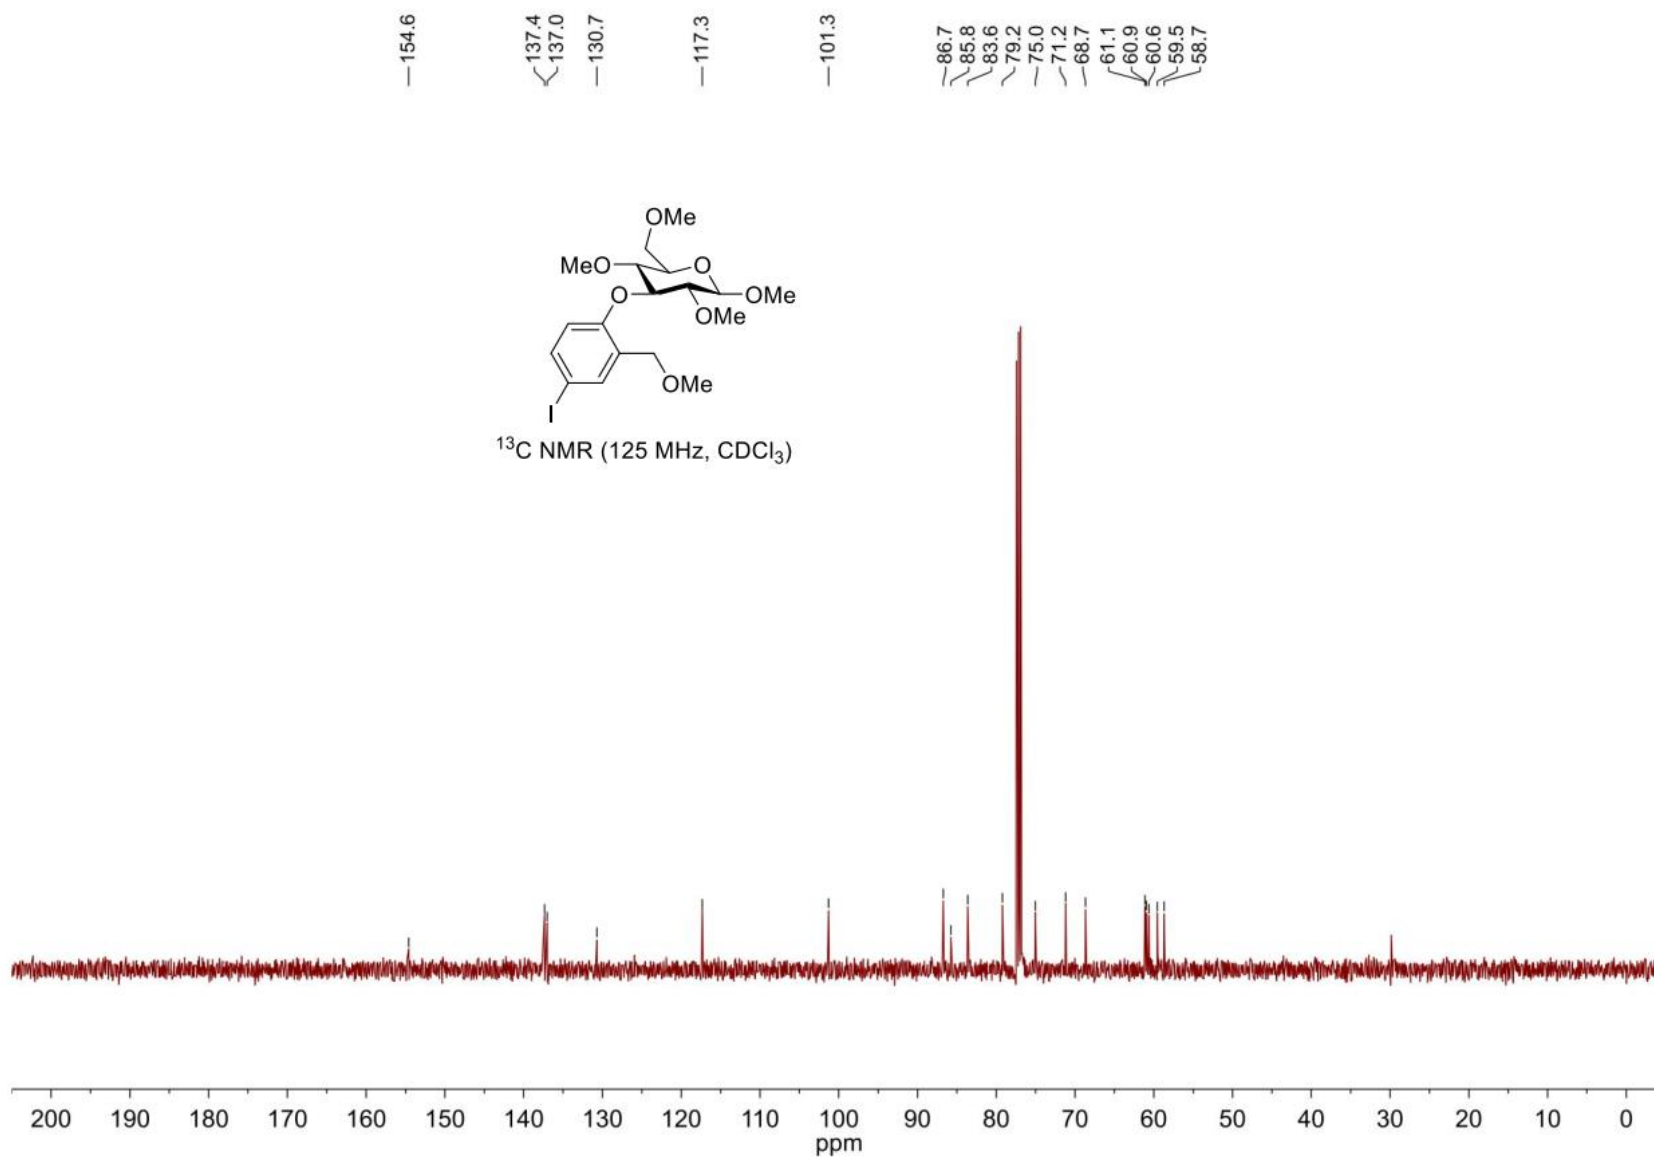

Methyl 2-((2*S*,3*R*)-2,7'-diethyl-5'-iodo-2'-oxo-4,5-dihydro-2*H*-spiro[furan-3,3'-indolin]-2-yl)acetate (S26)

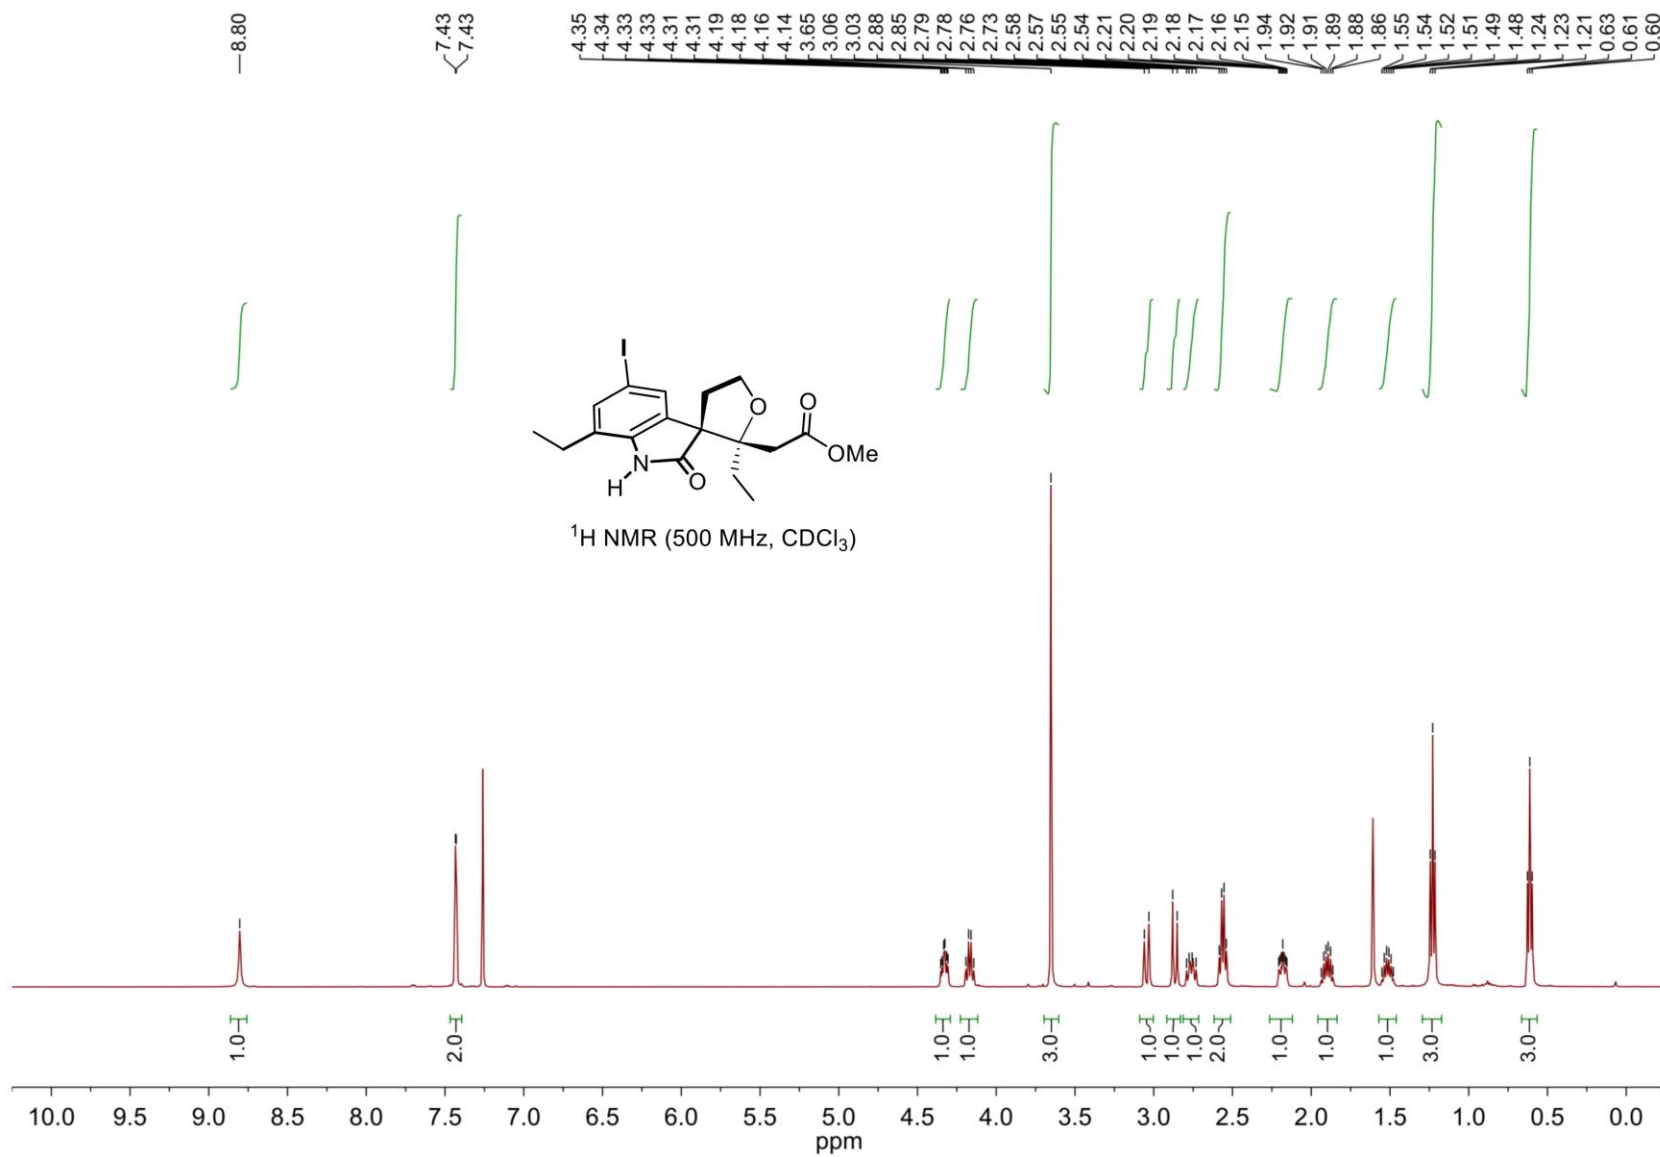

S269

# Methyl 2-((2*S*,3*R*)-2,7'-diethyl-5'-iodo-2'-oxo-4,5-dihydro-2*H*-spiro[furan-3,3'-indolin]-2-yl)acetate (S26)

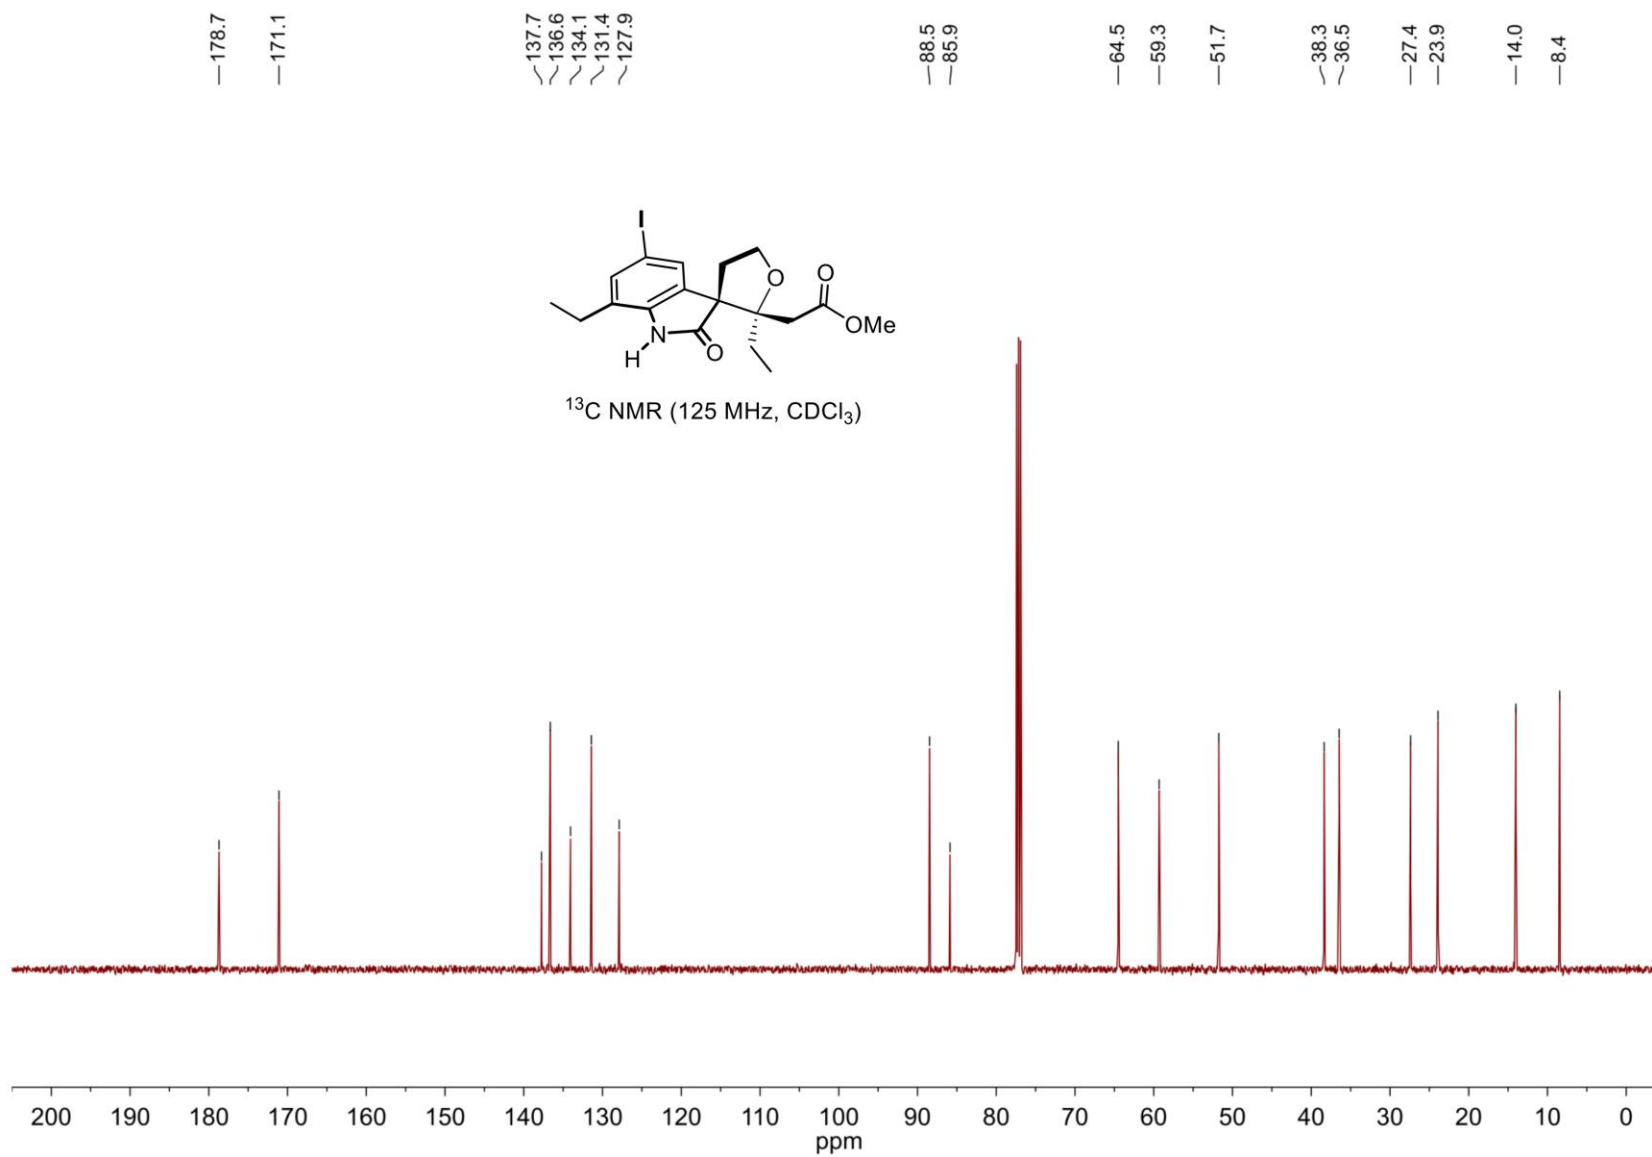

S270

1-((4-Iodonaphthalen-1-yl)oxy)-3-(*N*-isopropylacetamido)propan-2-yl acetate (S27)

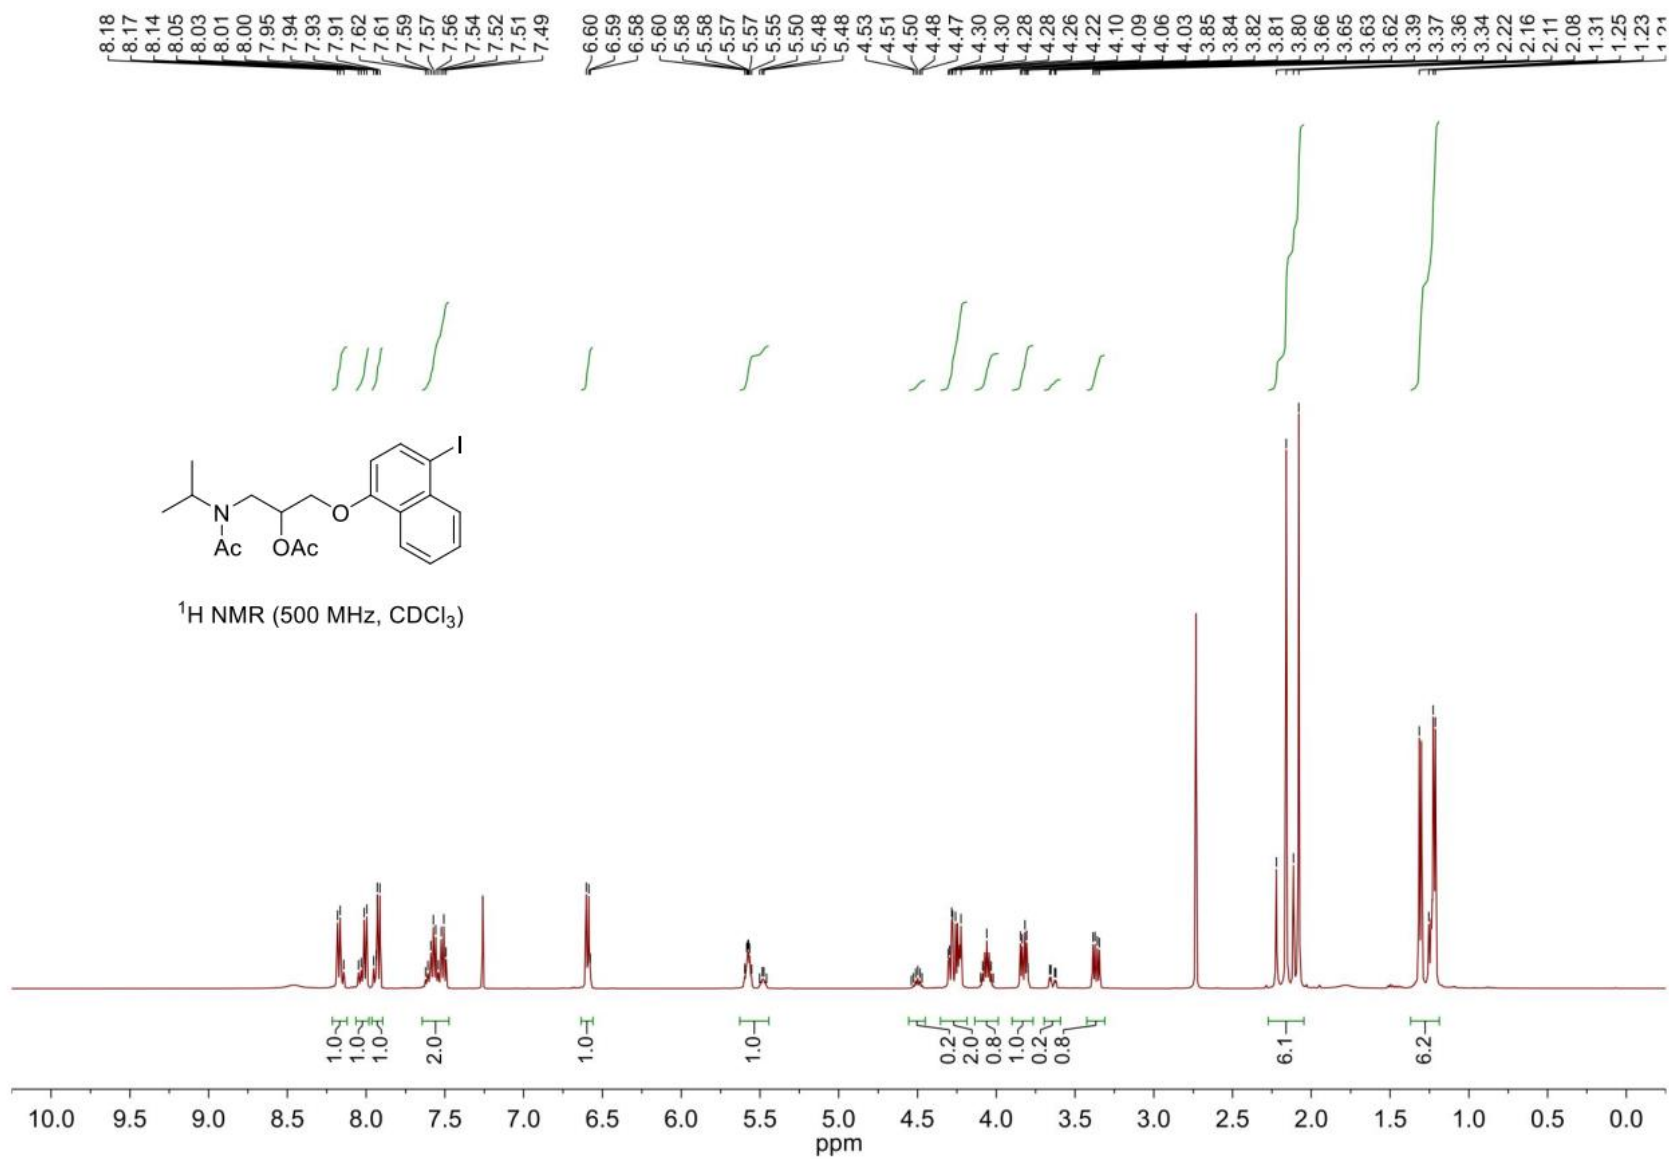

S271

# 1-((4-Iodonaphthalen-1-yl)oxy)-3-(*N*-isopropylacetamido)propan-2-yl acetate (S27)

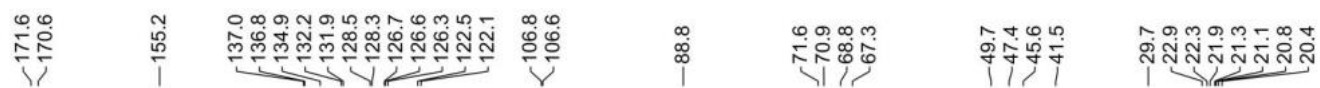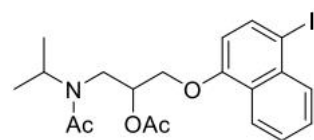

$^{13}\text{C}$  NMR (125 MHz,  $\text{CDCl}_3$ )

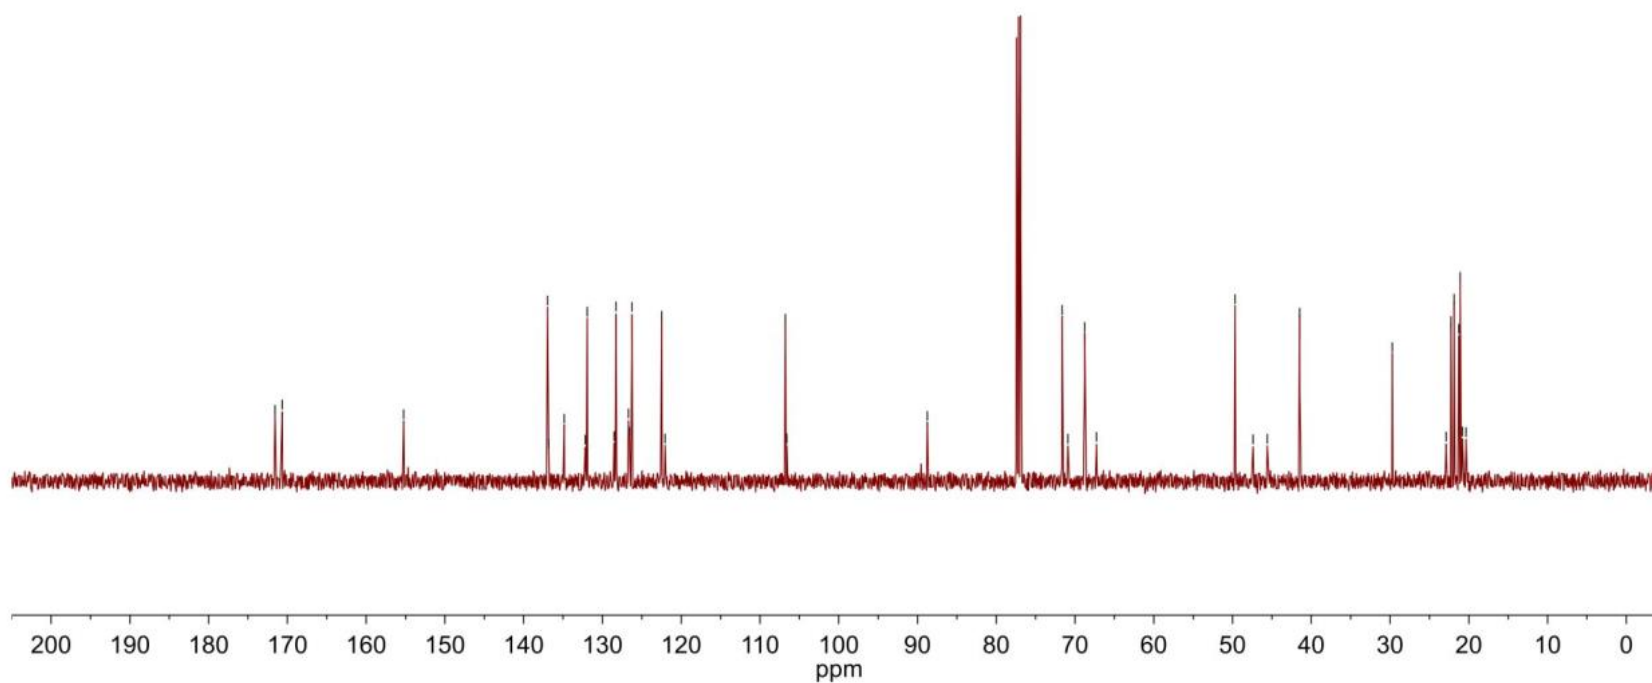

S272



# Methyl 5-(4-iodo-2,5-dimethylphenoxy)-2,2-dimethylpentanoate (S28)

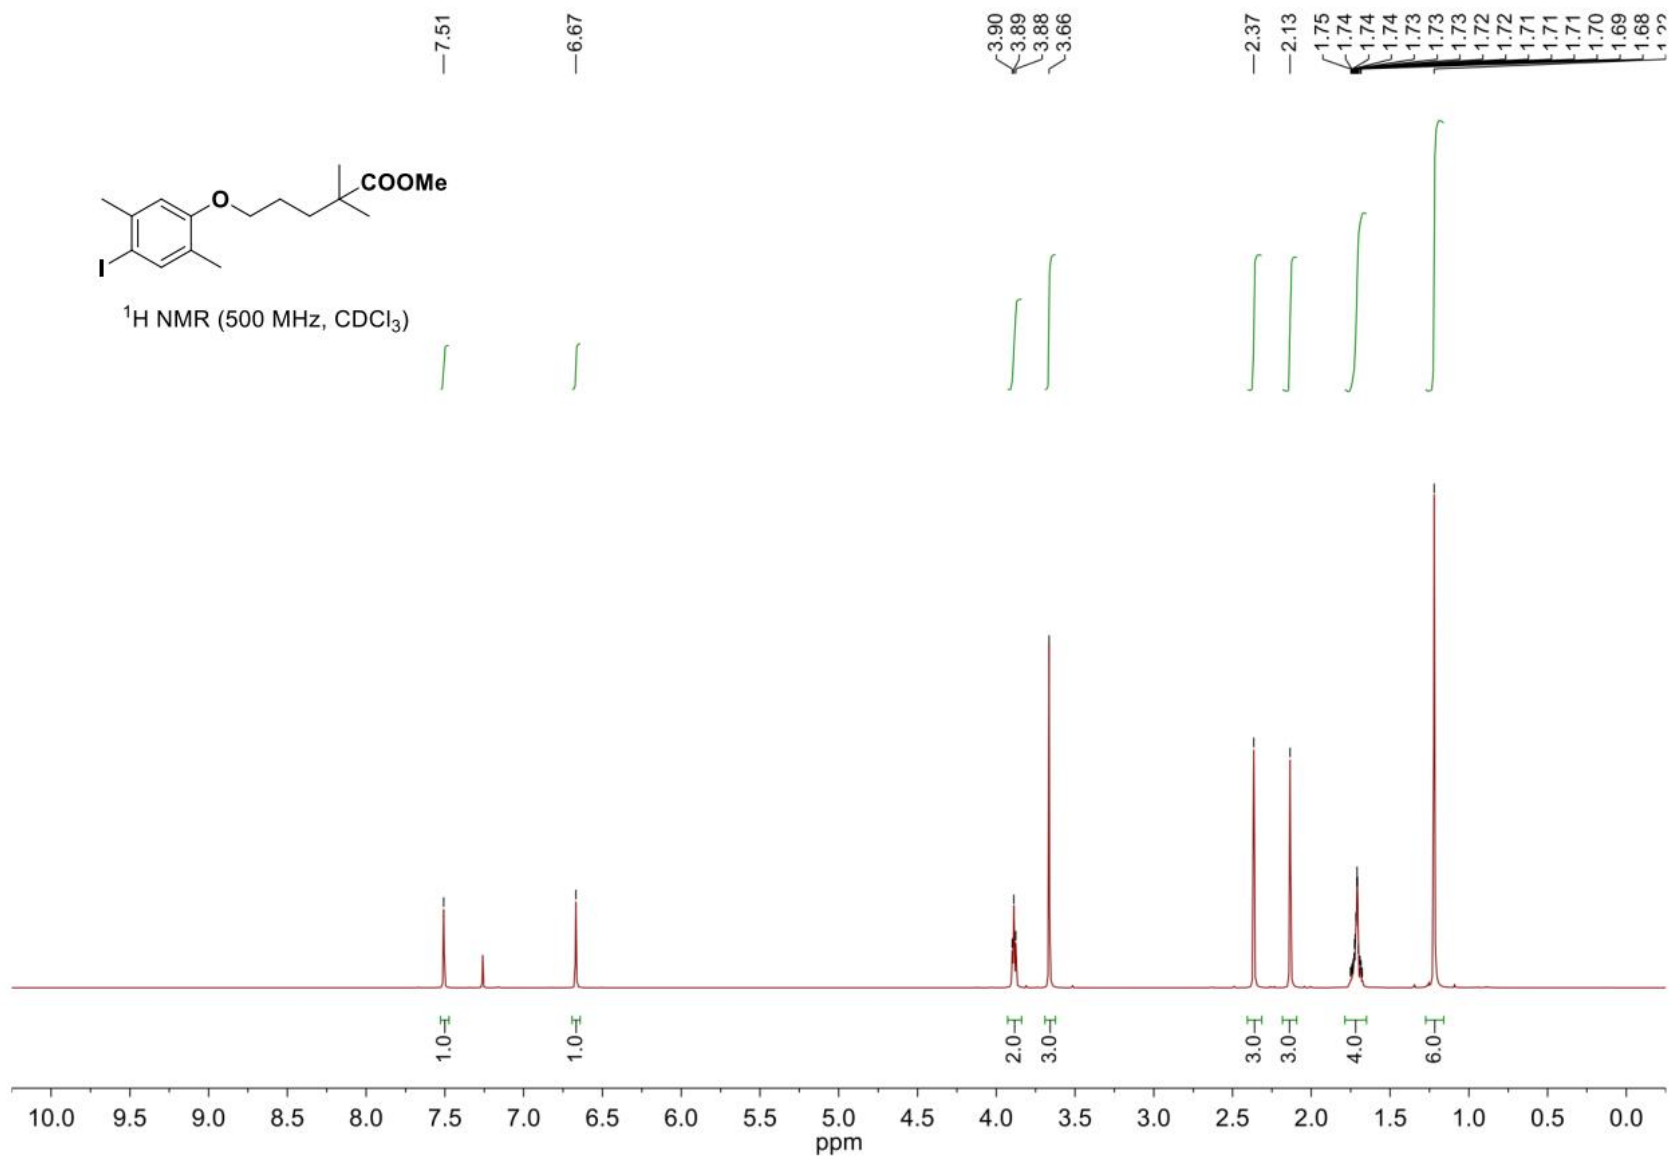

S273



# Methyl 4-(5-bromonicotinamido)butanoate (S29)

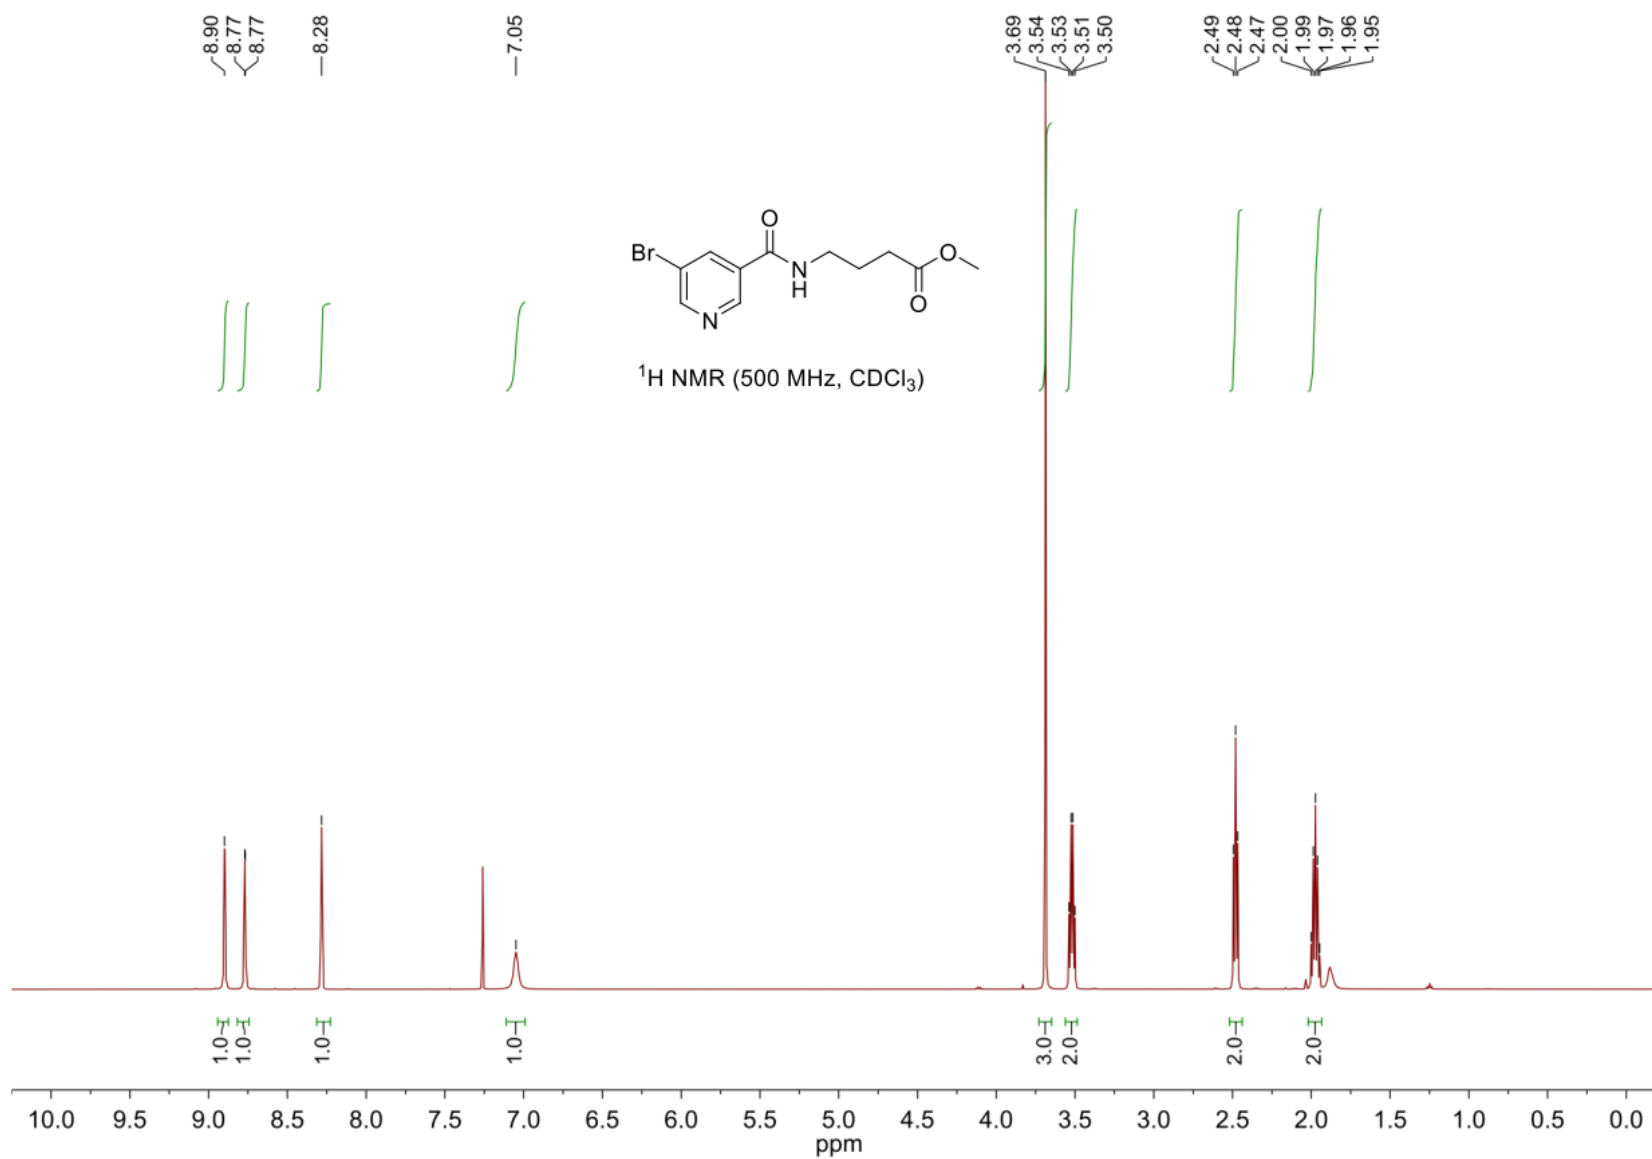

S275



# 4,4,5,5-Tetramethyl-2-(*p*-tolyl)-1,3,2-dioxaborolane (2)

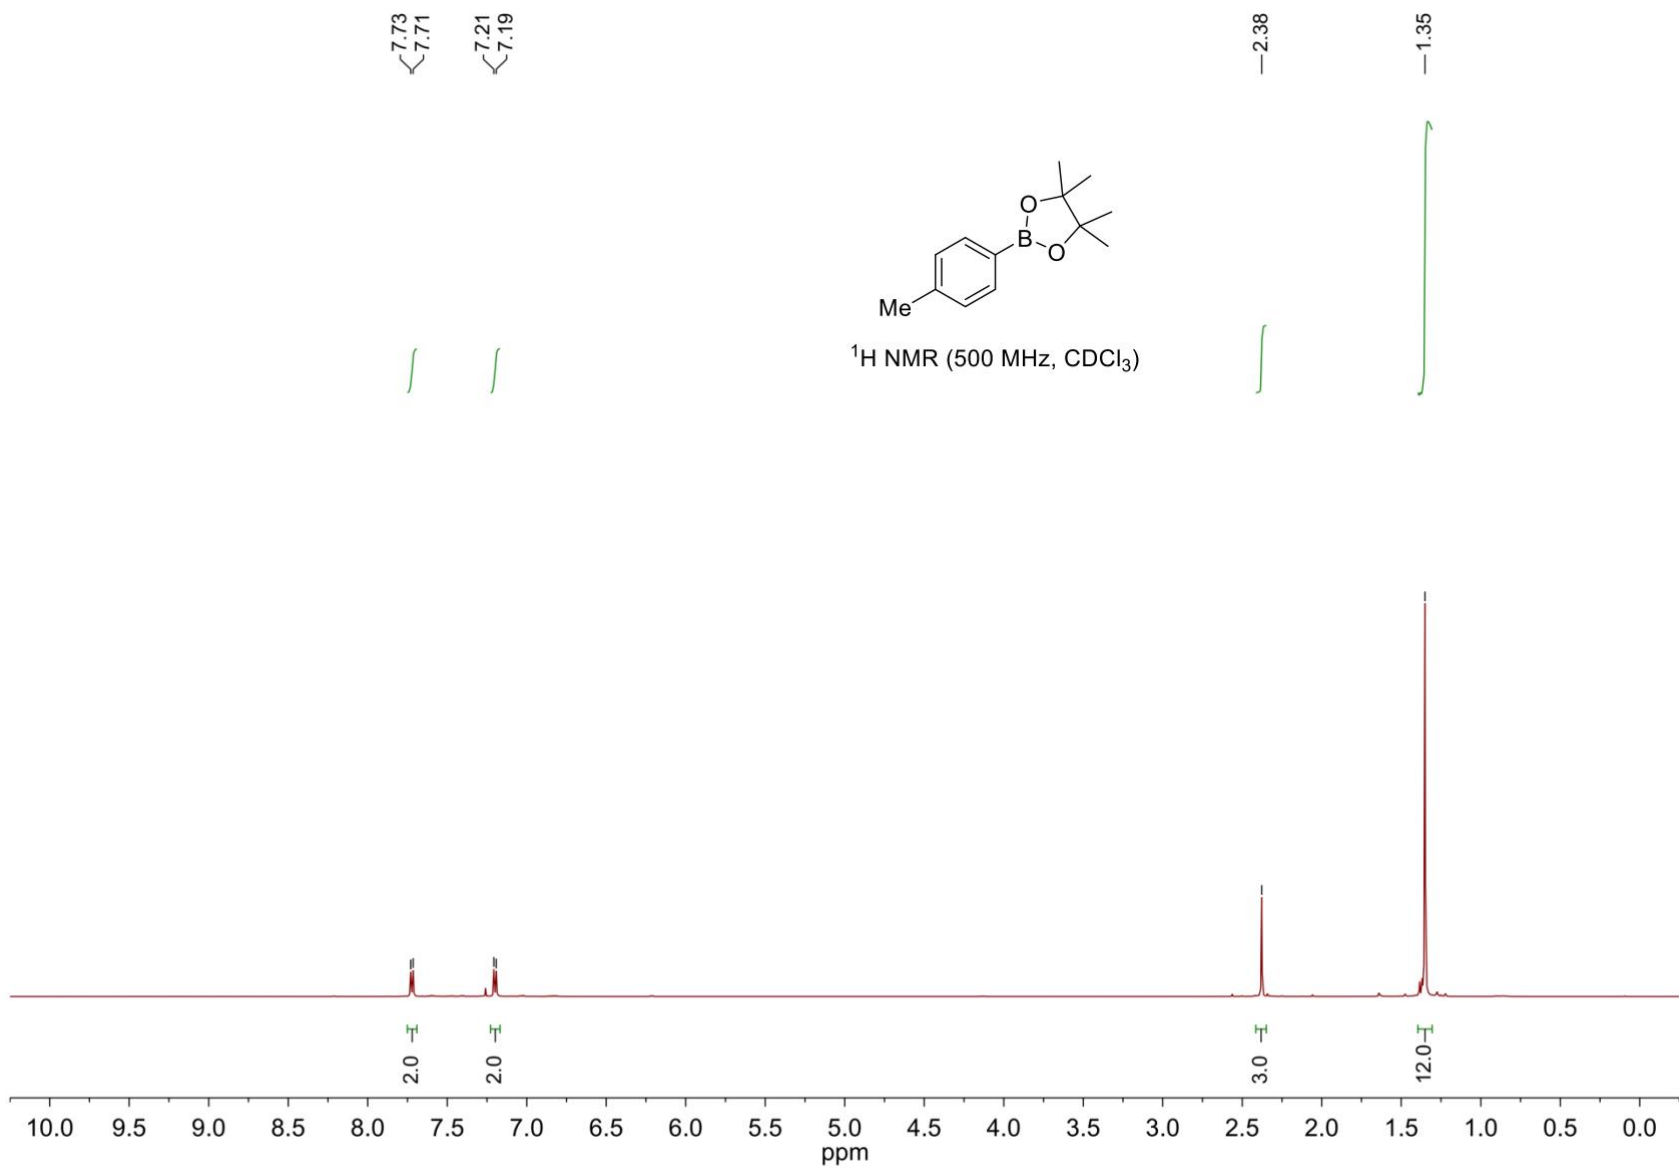

### 4,4,5,5-Tetramethyl-2-(*p*-tolyl)-1,3,2-dioxaborolane (2)

—141.5  
—134.9  
—128.6

—83.7

—25.0  
—21.9

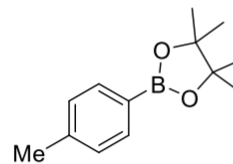

$^{13}\text{C}$  NMR (125 MHz,  $\text{CDCl}_3$ )

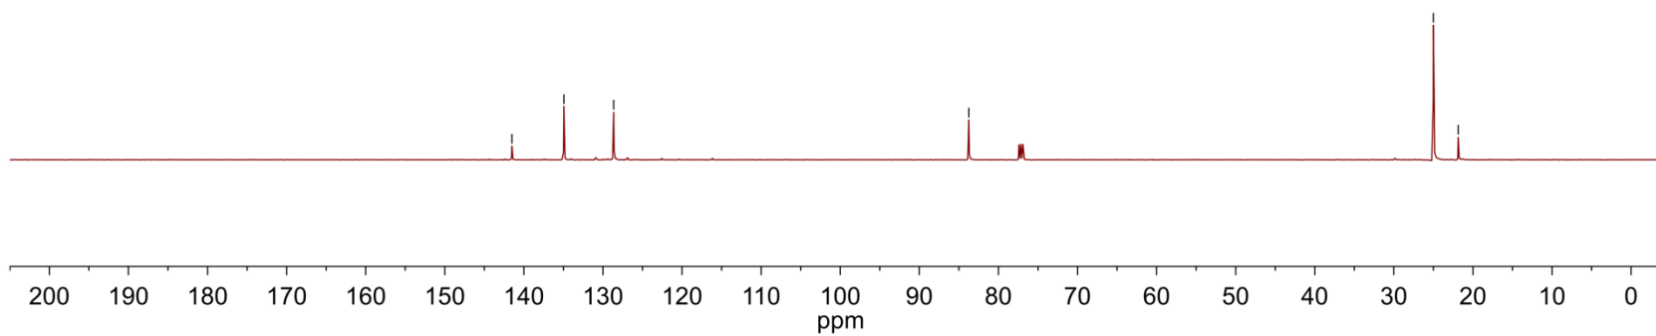

### 4,4,5,5-Tetramethyl-2-phenyl-1,3,2-dioxaborolane (3)

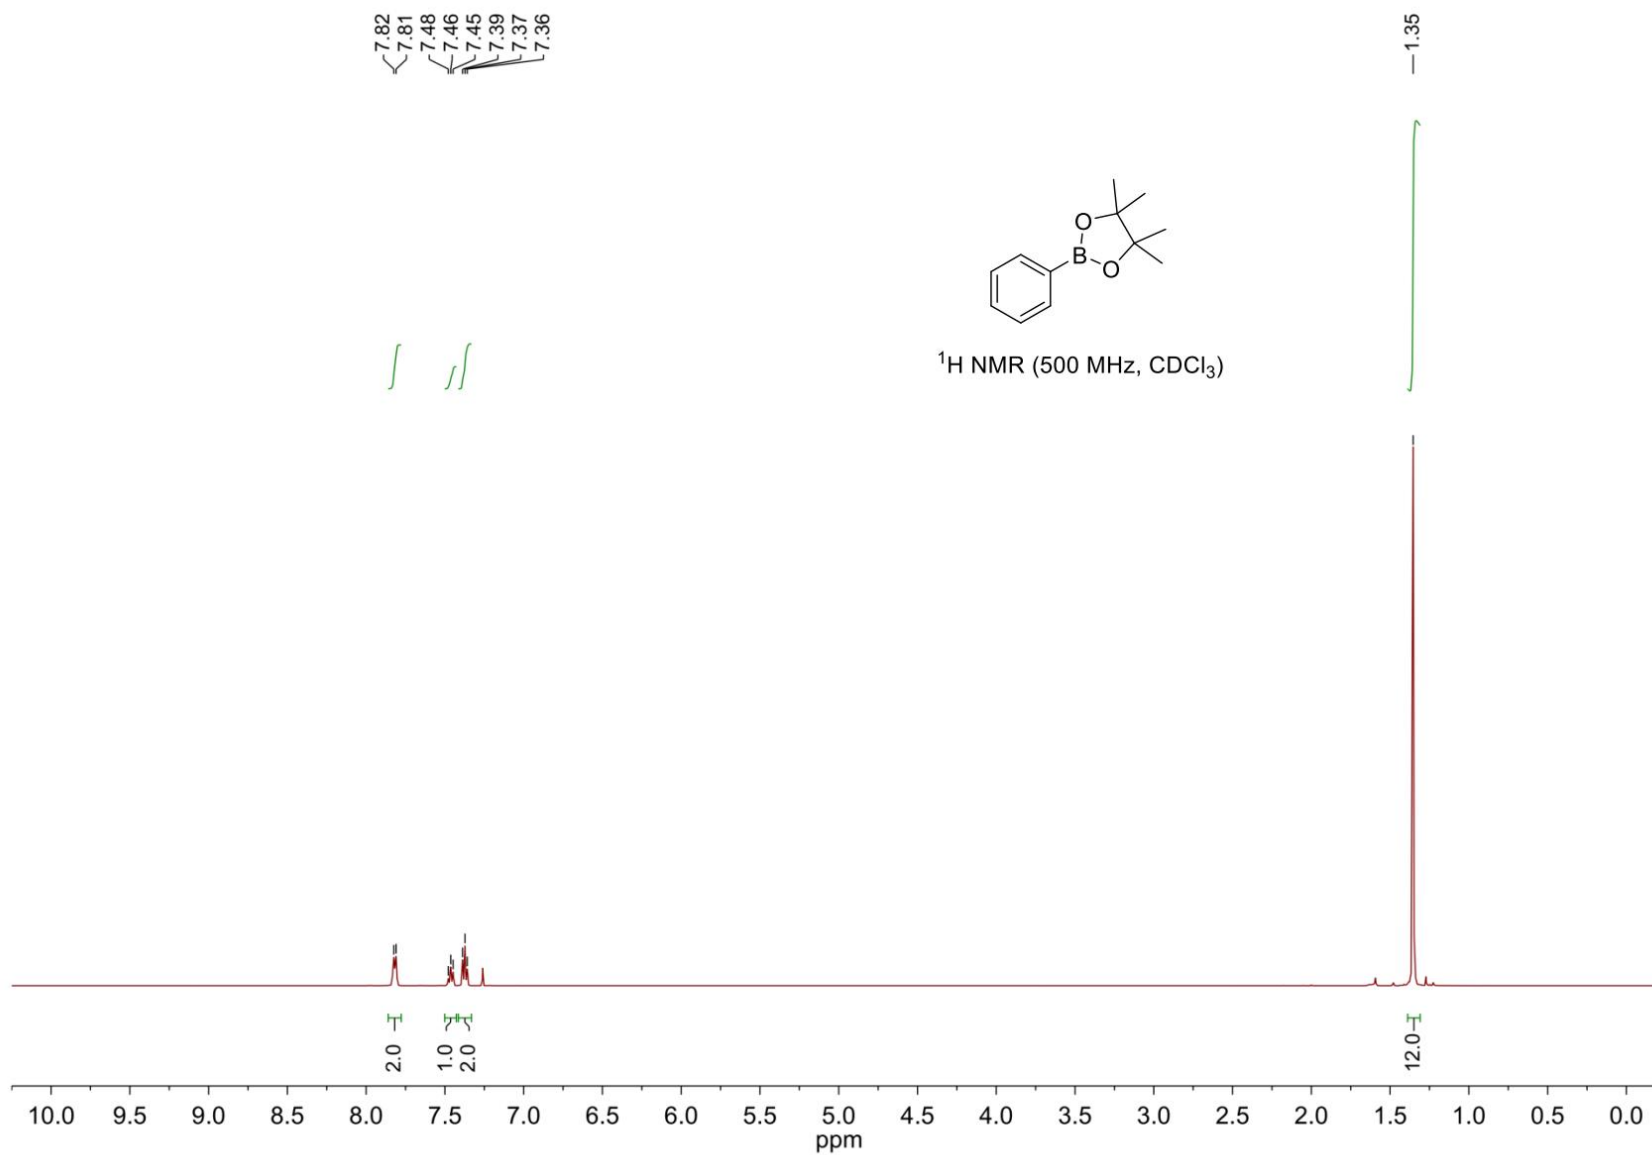

### 4,4,5,5-Tetramethyl-2-phenyl-1,3,2-dioxaborolane (3)

~134.9  
—131.4  
~127.8

—83.9

—25.0

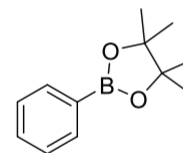

<sup>13</sup>C NMR (125 MHz, CDCl<sub>3</sub>)

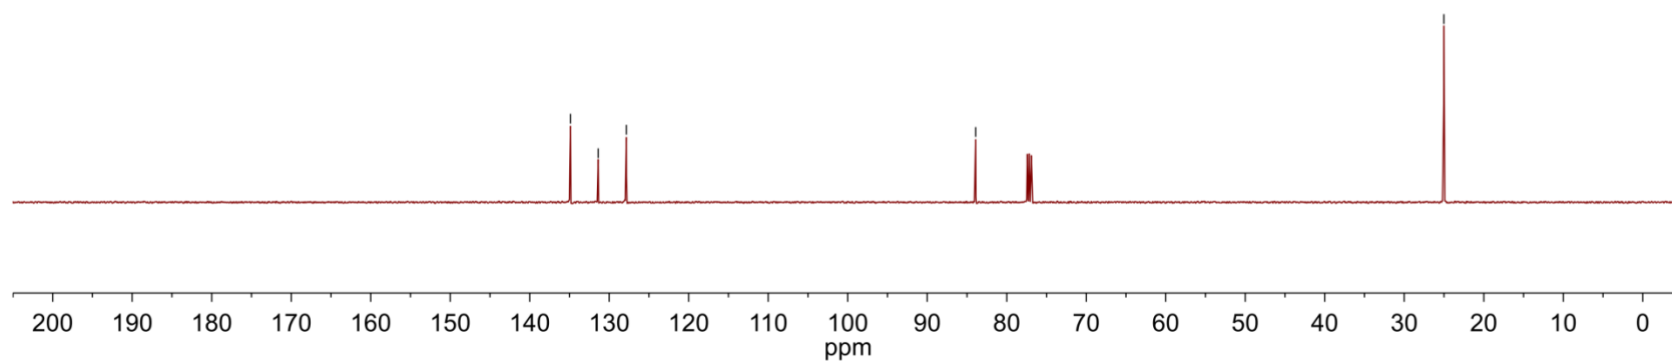



# 4,4,5,5-Tetramethyl-2-(*o*-tolyl)-1,3,2-dioxaborolane (4)

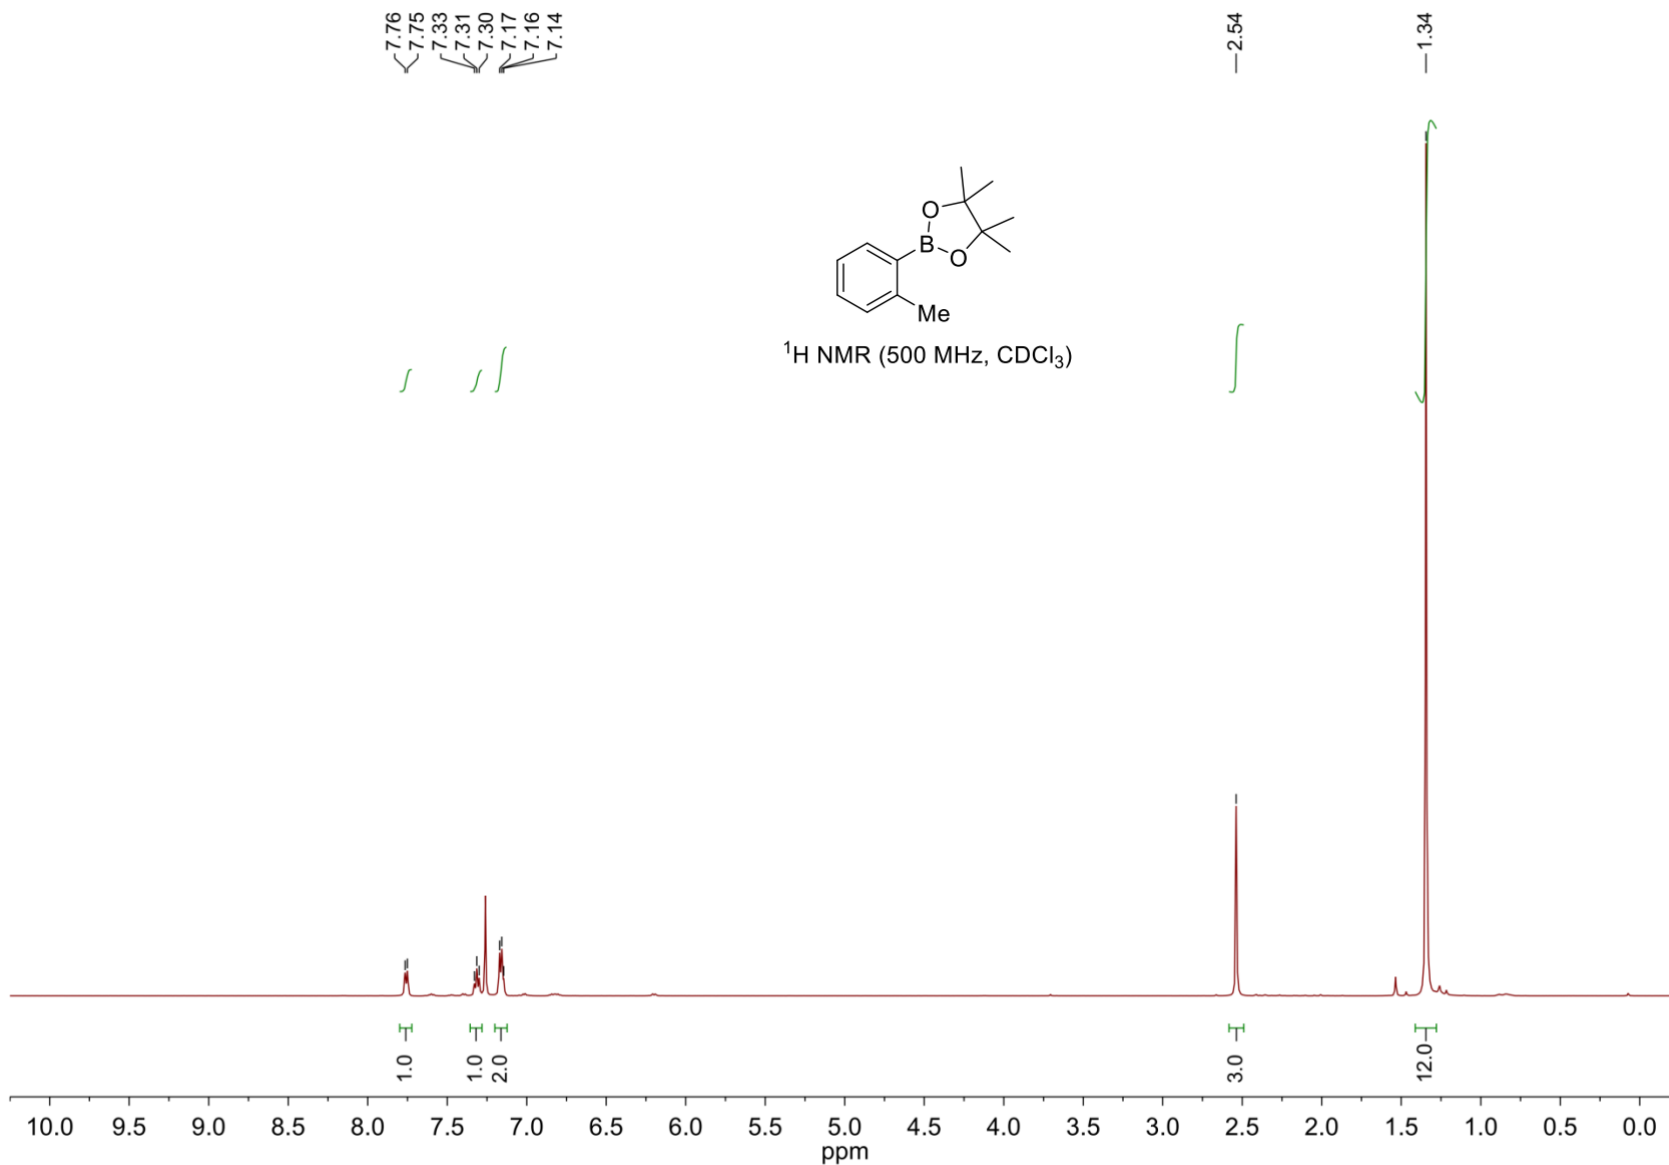

# 4,4,5,5-Tetramethyl-2-(*o*-tolyl)-1,3,2-dioxaborolane (4)

— 145.0  
~ 136.0  
~ 130.9  
~ 129.9  
~ 124.8

— 83.6

— 25.0  
— 22.4

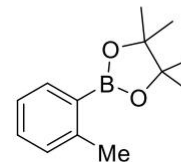

<sup>13</sup>C NMR (125 MHz, CDCl<sub>3</sub>)

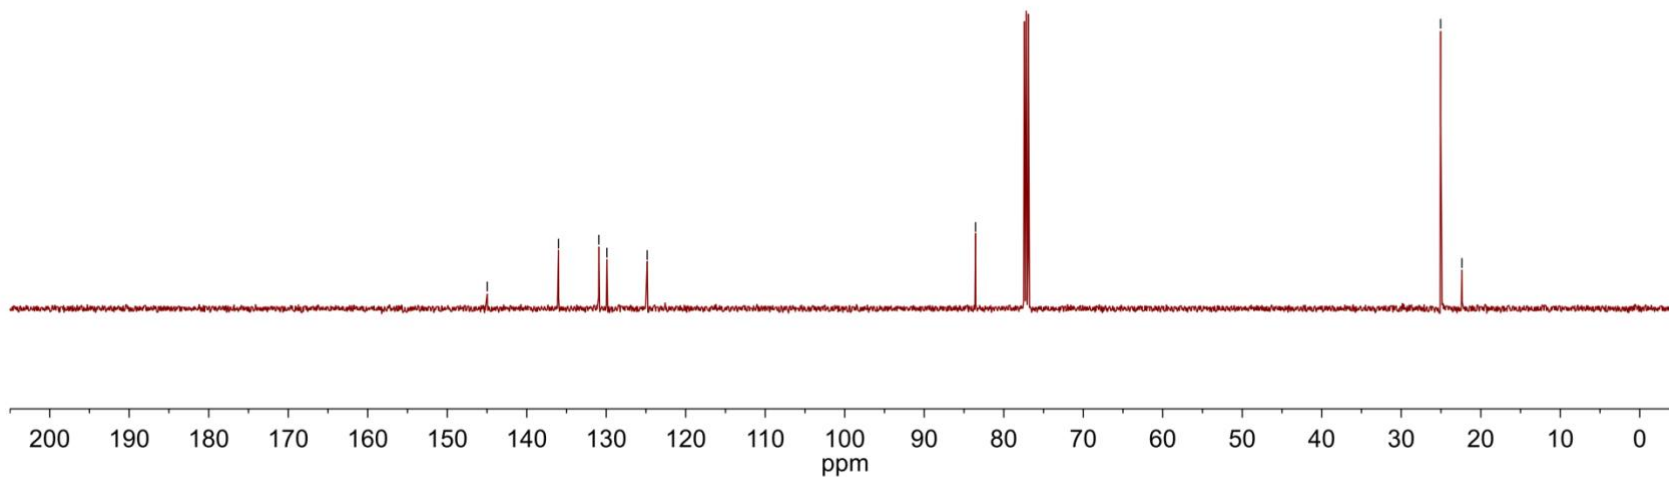

# 4,4,5,5-Tetramethyl-2-(*m*-tolyl)-1,3,2-dioxaborolane (5)

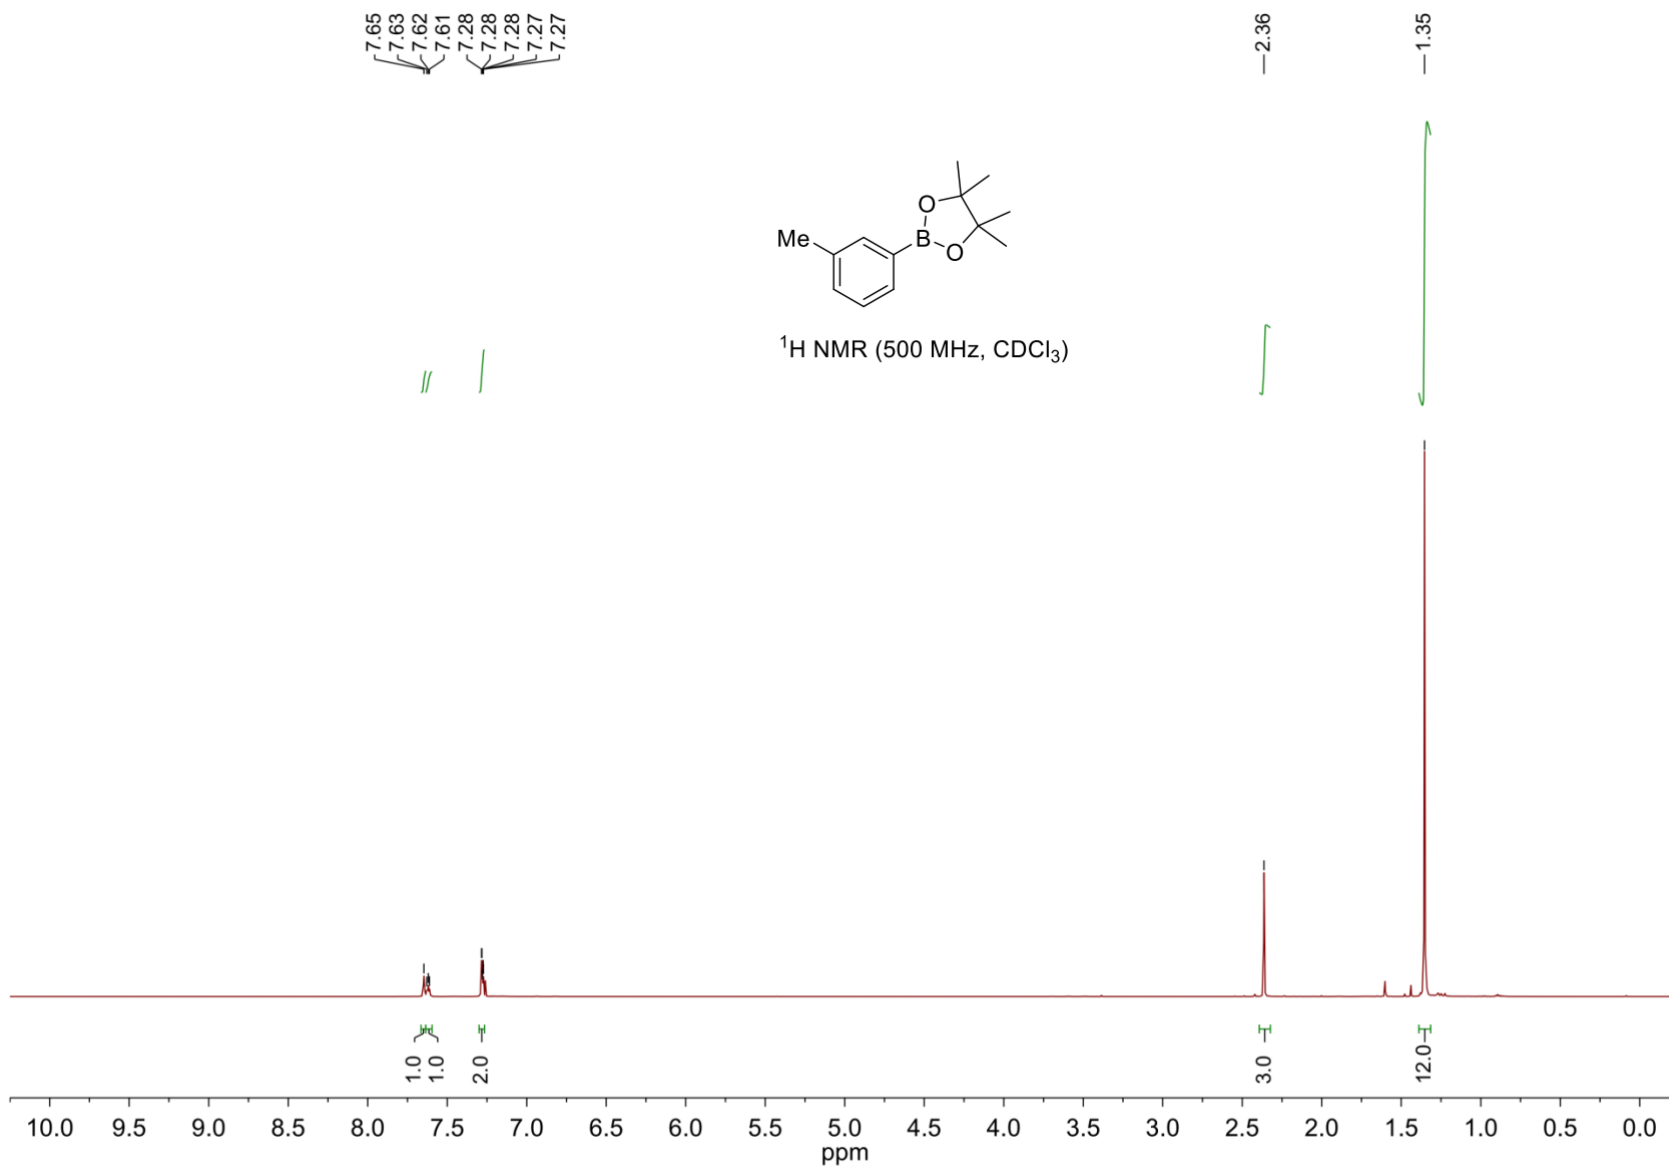

# 4,4,5,5-Tetramethyl-2-(*m*-tolyl)-1,3,2-dioxaborolane (5)

137.3  
135.5  
132.2  
131.9  
127.8

83.9

25.0  
21.4

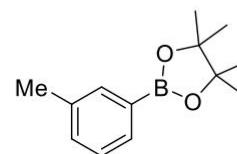

<sup>13</sup>C NMR (125 MHz, CDCl<sub>3</sub>)

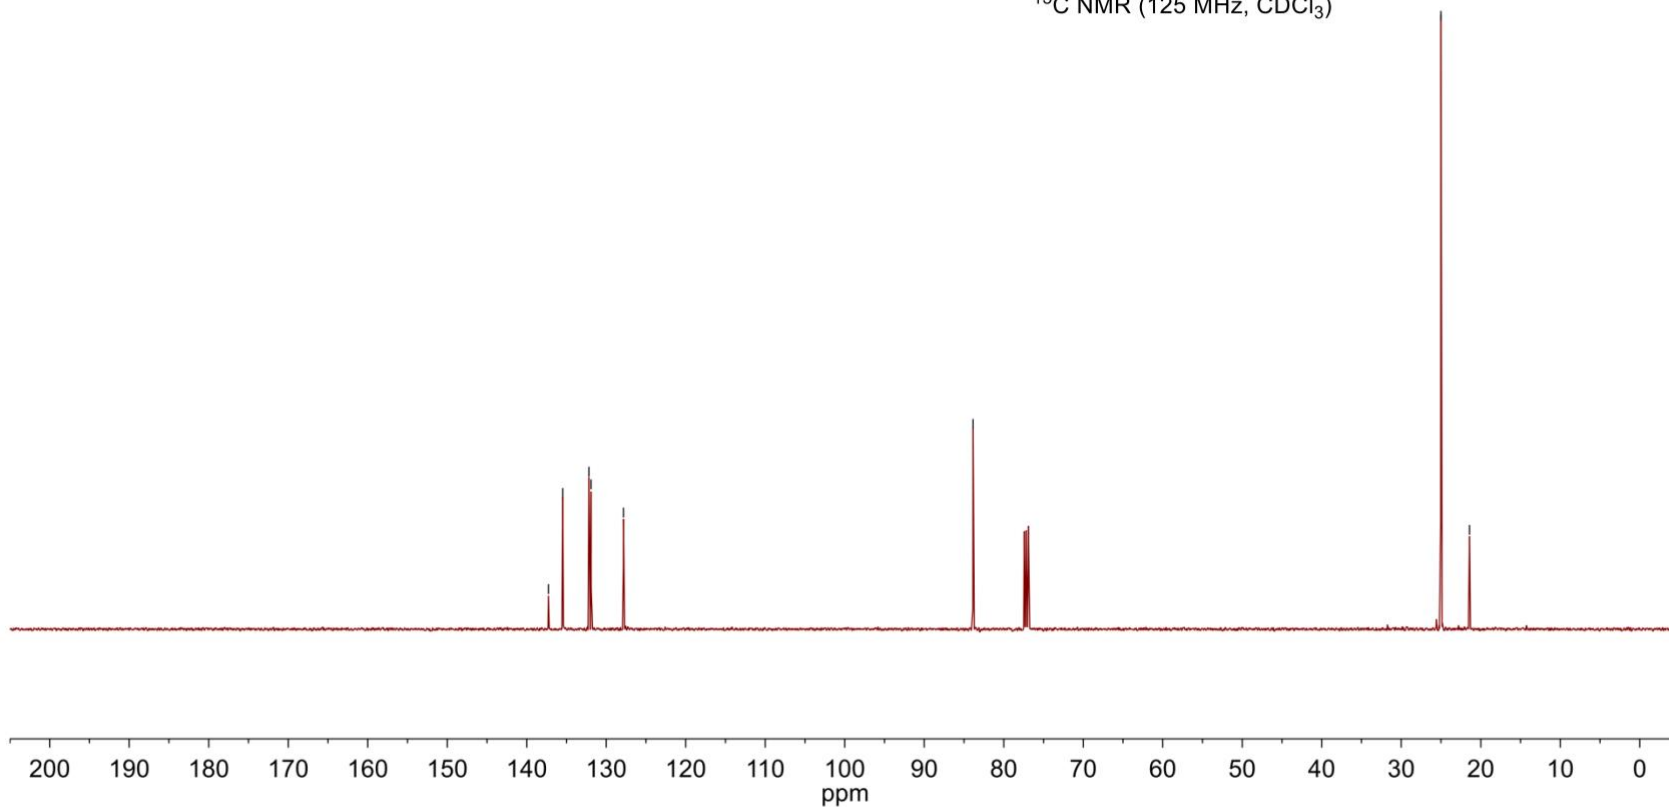

2-(4-(*tert*-Butyl)phenyl)-4,4,5,5-tetramethyl-1,3,2-dioxaborolane (6)

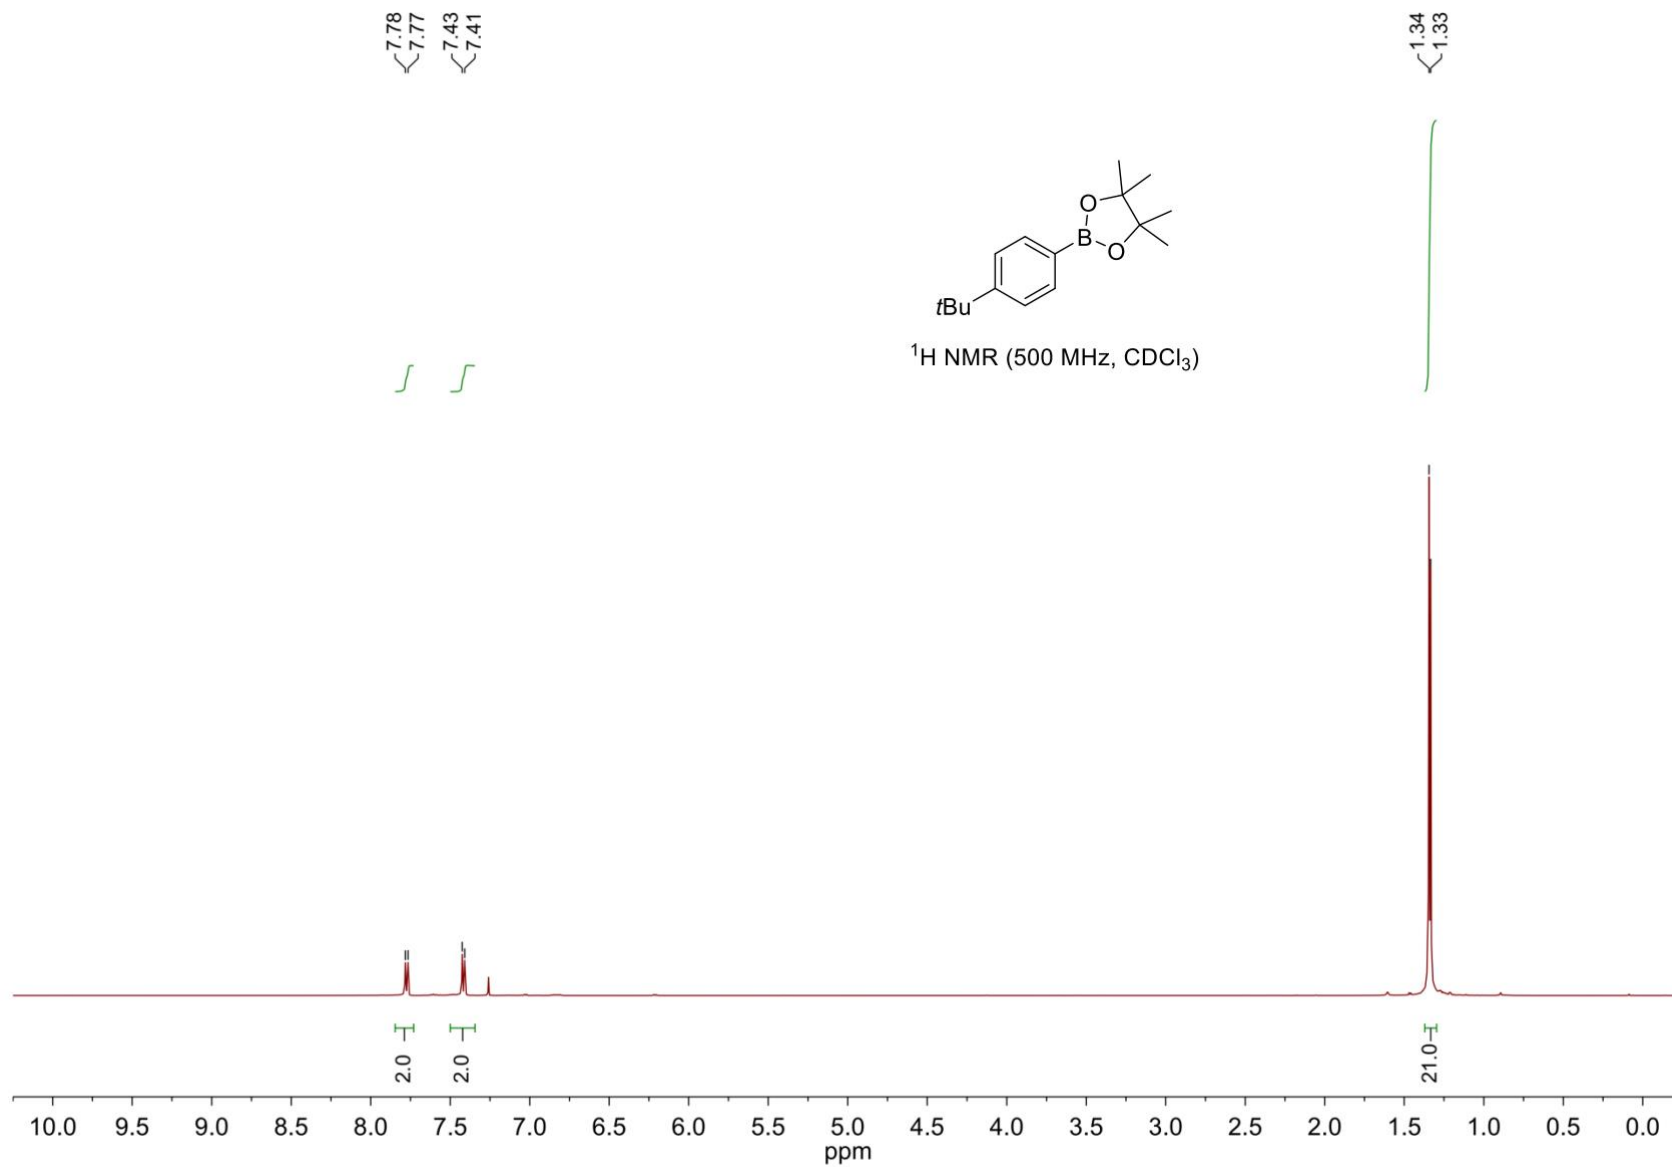



2-(3-(*tert*-Butyl)phenyl)-4,4,5,5-tetramethyl-1,3,2-dioxaborolane (7)

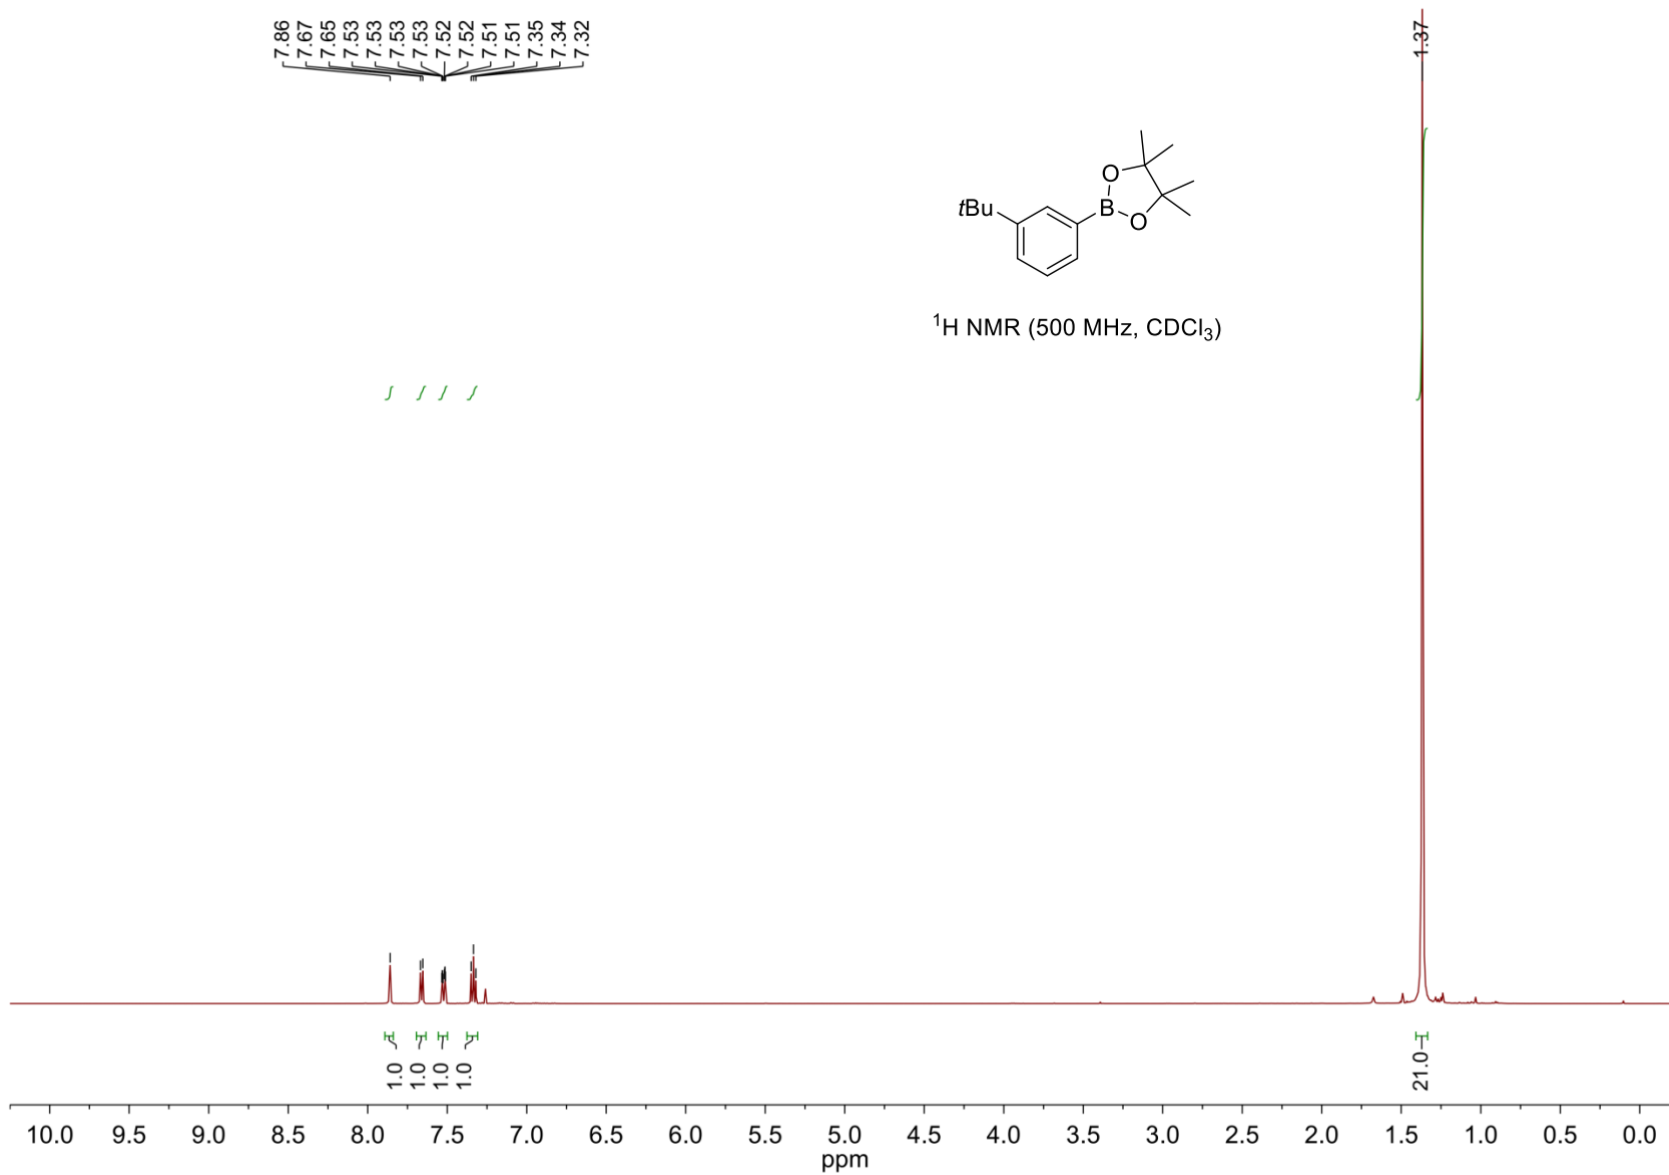

## 2-(3-(*tert*-Butyl)phenyl)-4,4,5,5-tetramethyl-1,3,2-dioxaborolane (7)

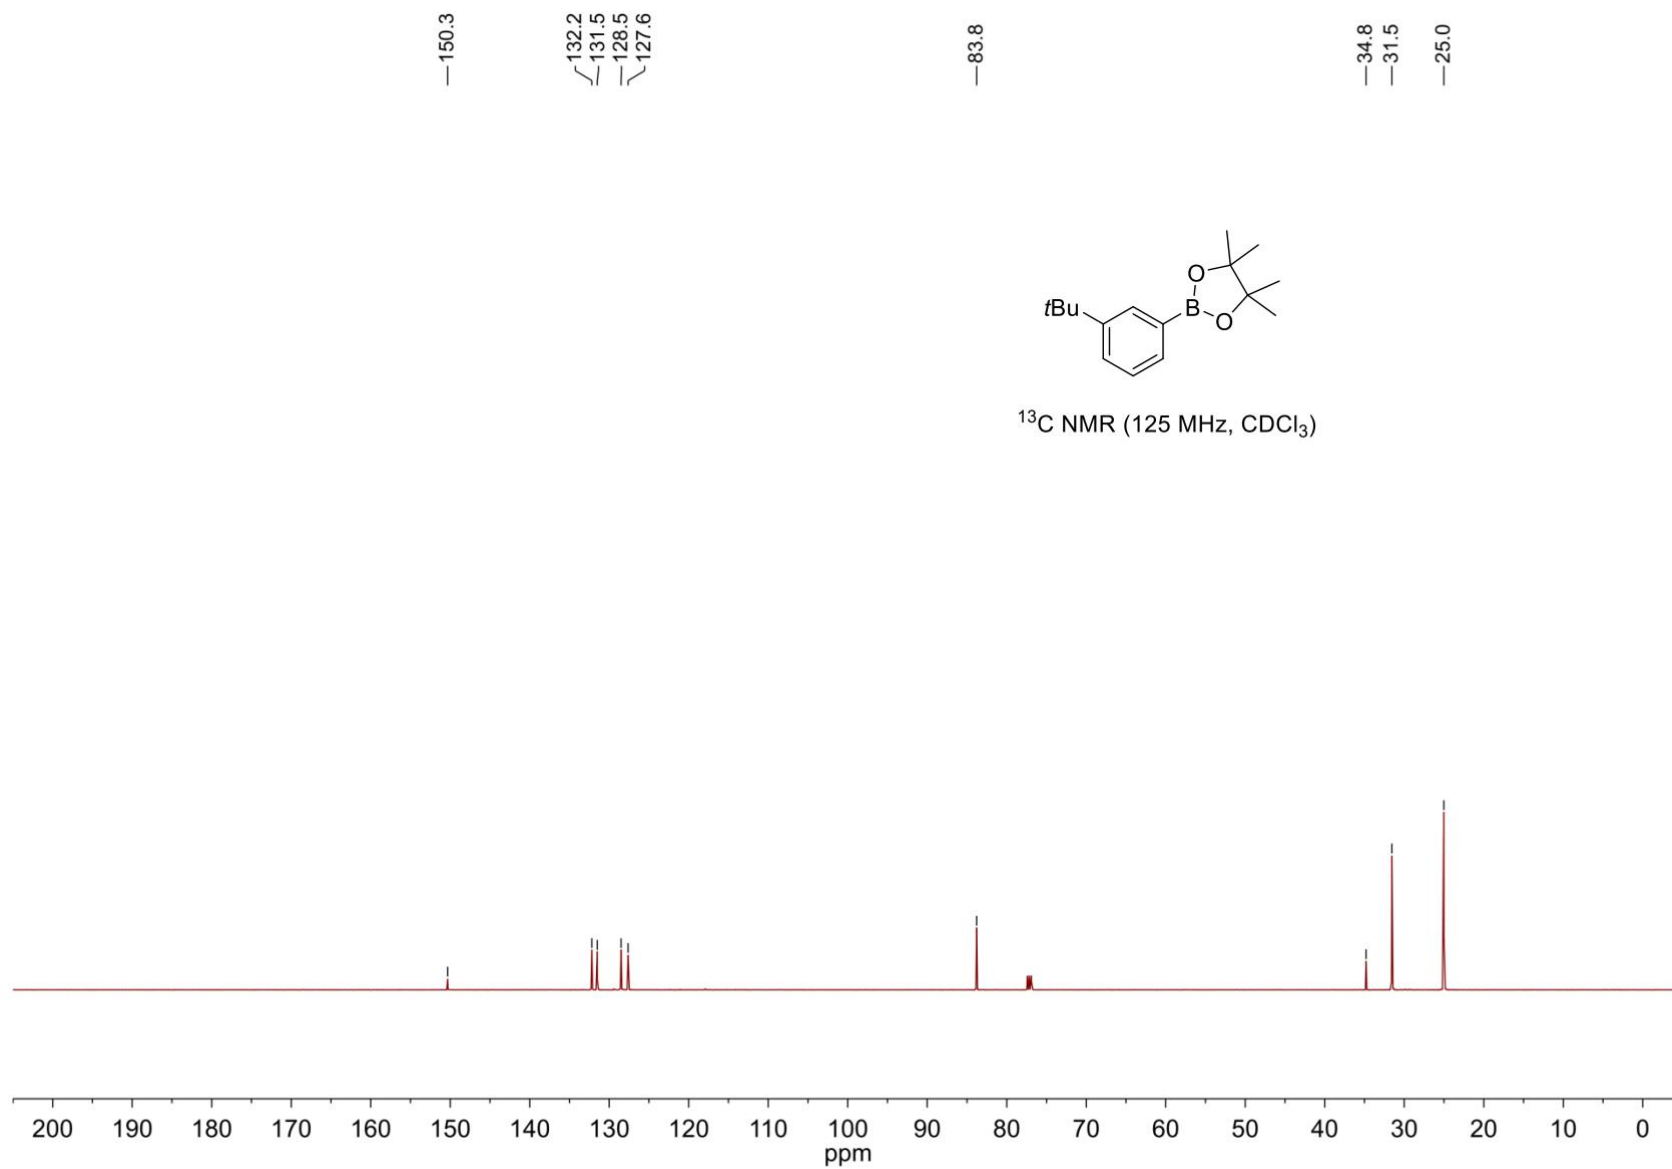



4,4,5,5-Tetramethyl-2-(5,6,7,8-tetrahydronaphthalen-2-yl)-1,3,2-dioxaborolane (8)

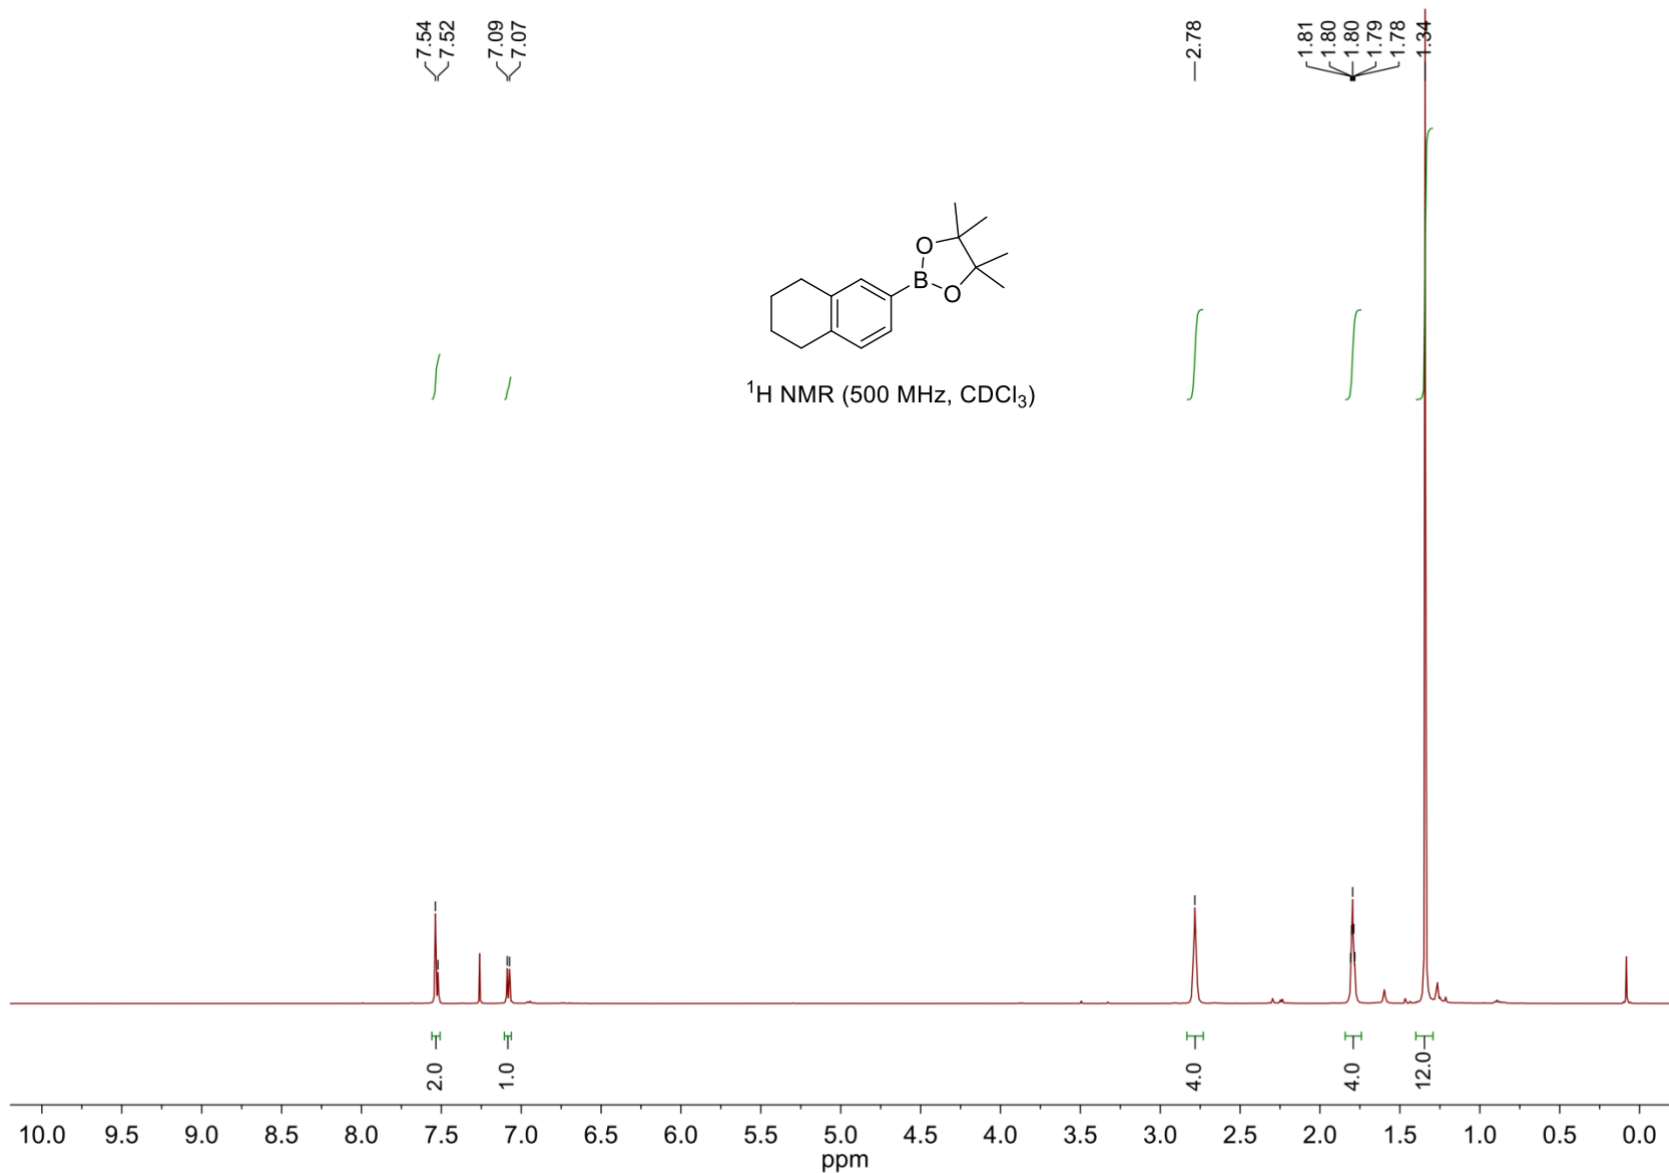

# 4,4,5,5-Tetramethyl-2-(5,6,7,8-tetrahydronaphthalen-2-yl)-1,3,2-dioxaborolane (8)

140.9  
136.7  
135.8  
131.9  
128.8

83.7

29.8  
29.3  
25.0  
23.4  
23.2

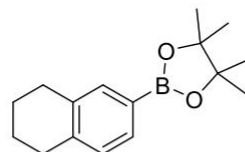

<sup>13</sup>C NMR (125 MHz, CDCl<sub>3</sub>)

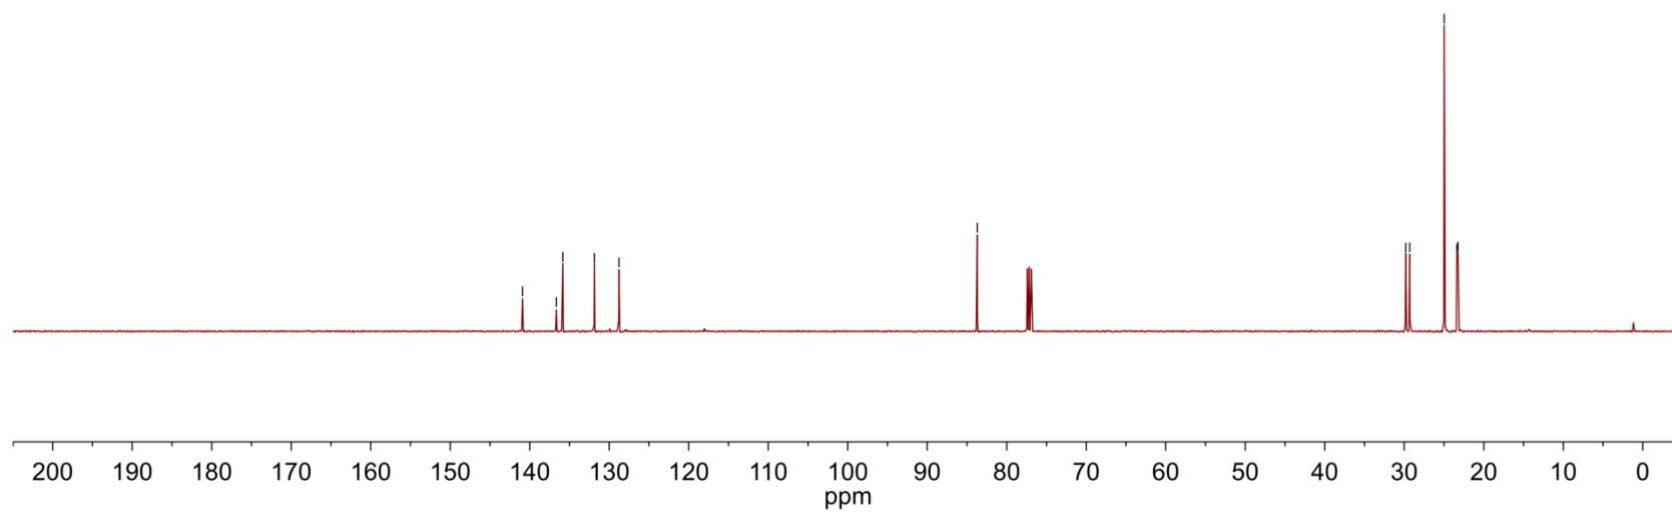

S290

## 2-(4-Methoxyphenyl)-4,4,5,5-tetramethyl-1,3,2-dioxaborolane (9)

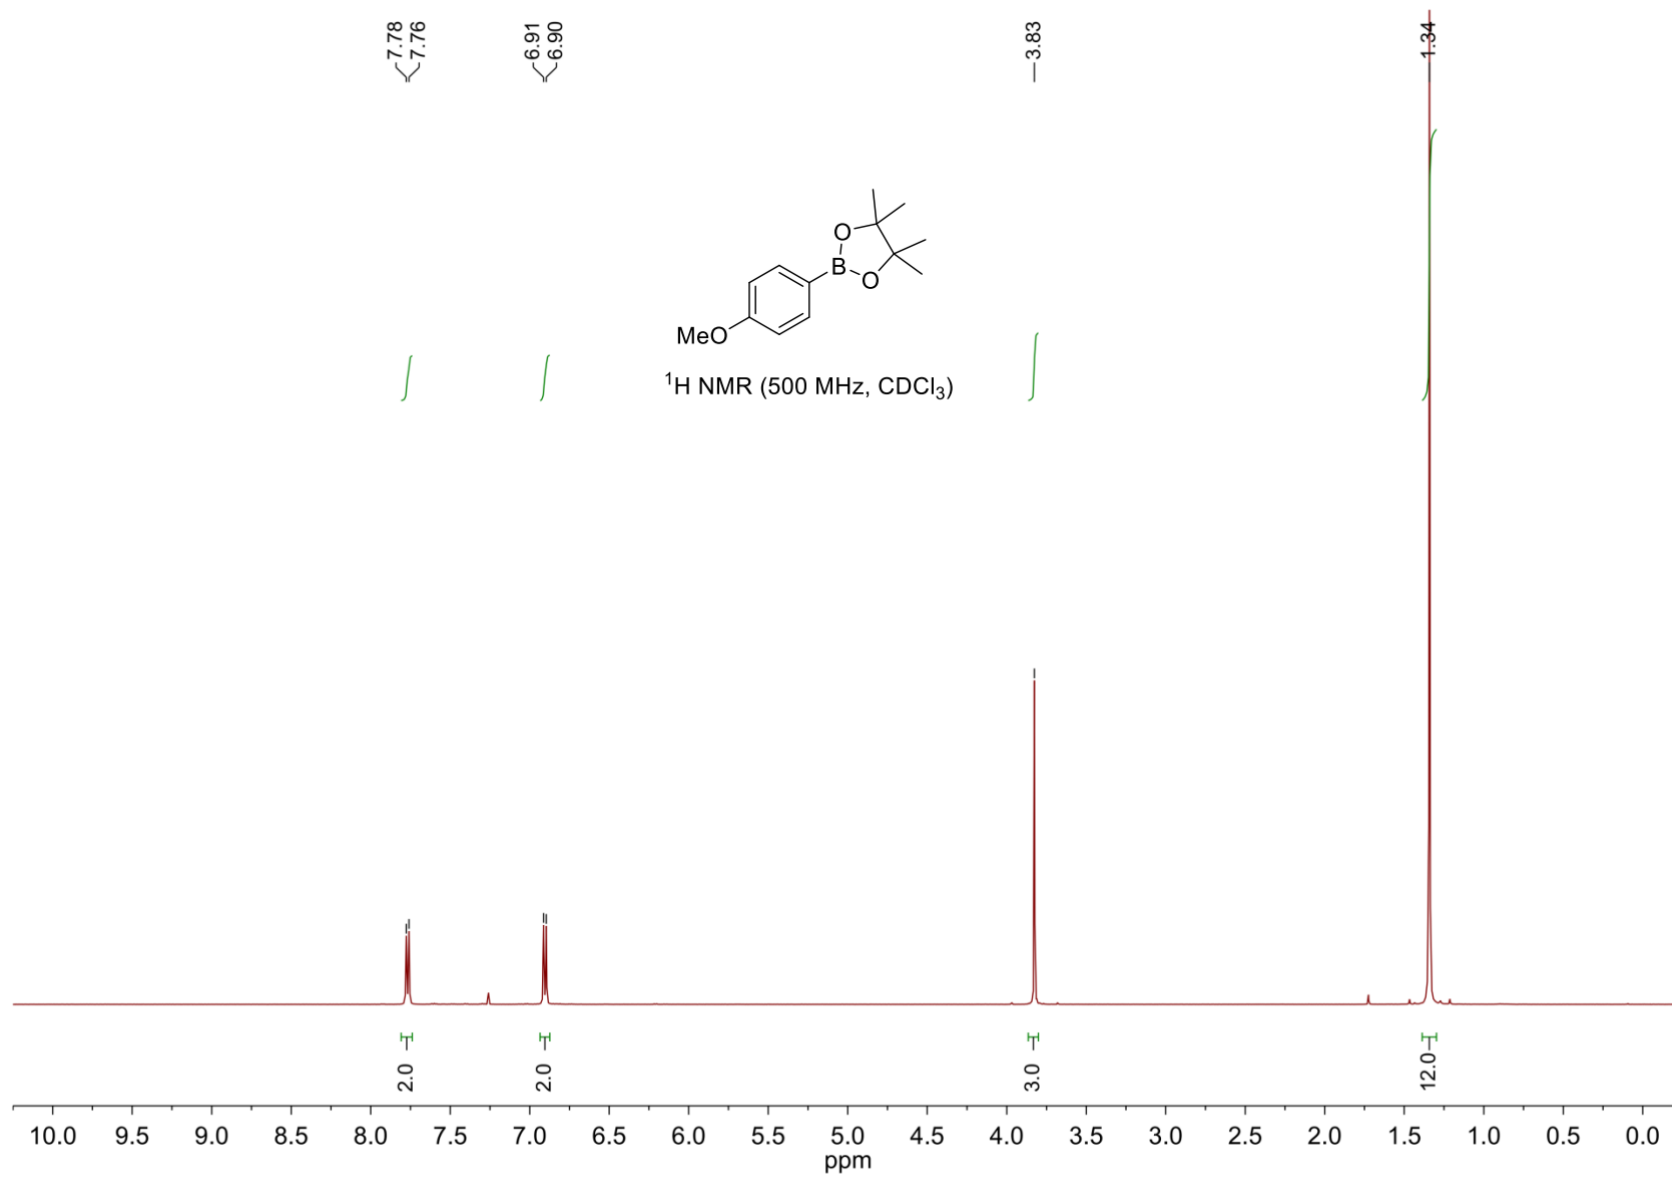

## 2-(4-Methoxyphenyl)-4,4,5,5-tetramethyl-1,3,2-dioxaborolane (9)

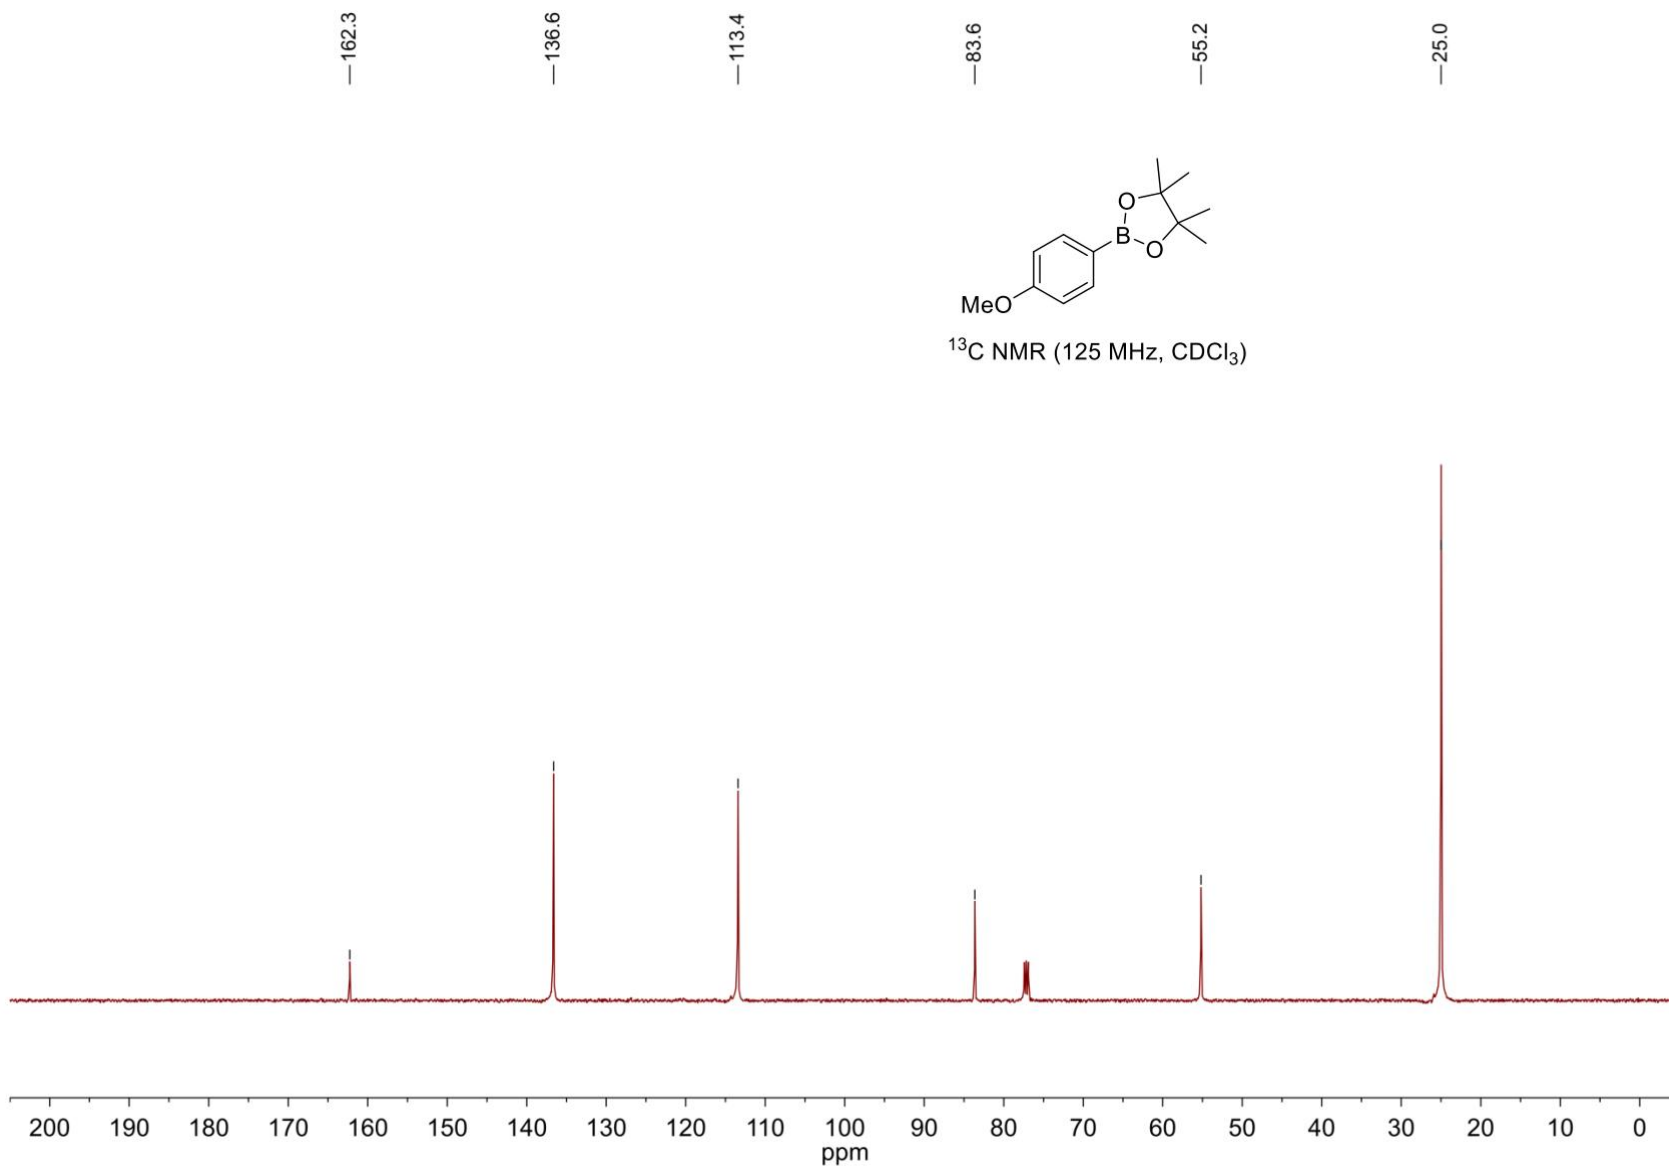

2-(Benzo[d][1,3]dioxol-5-yl)-4,4,5,5-tetramethyl-1,3,2-dioxaborolane (10)

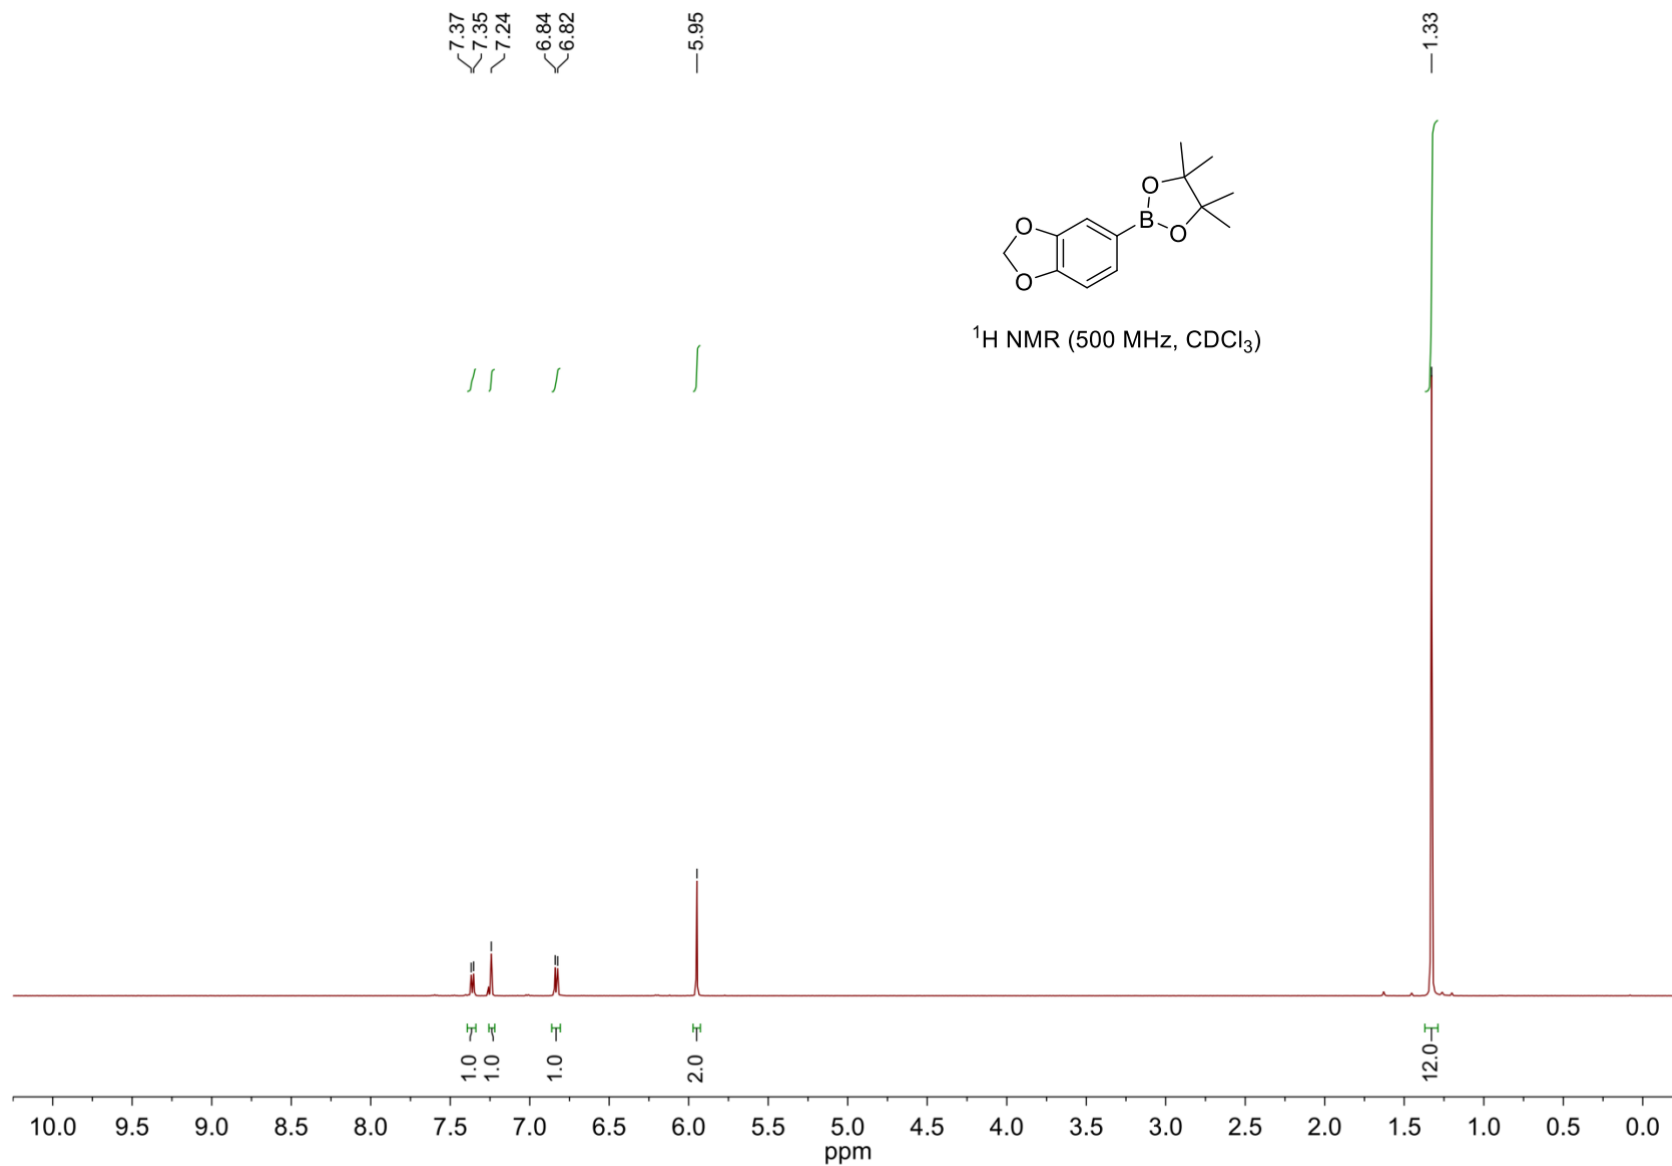

S293

## 2-(Benzo[d][1,3]dioxol-5-yl)-4,4,5,5-tetramethyl-1,3,2-dioxaborolane (10)

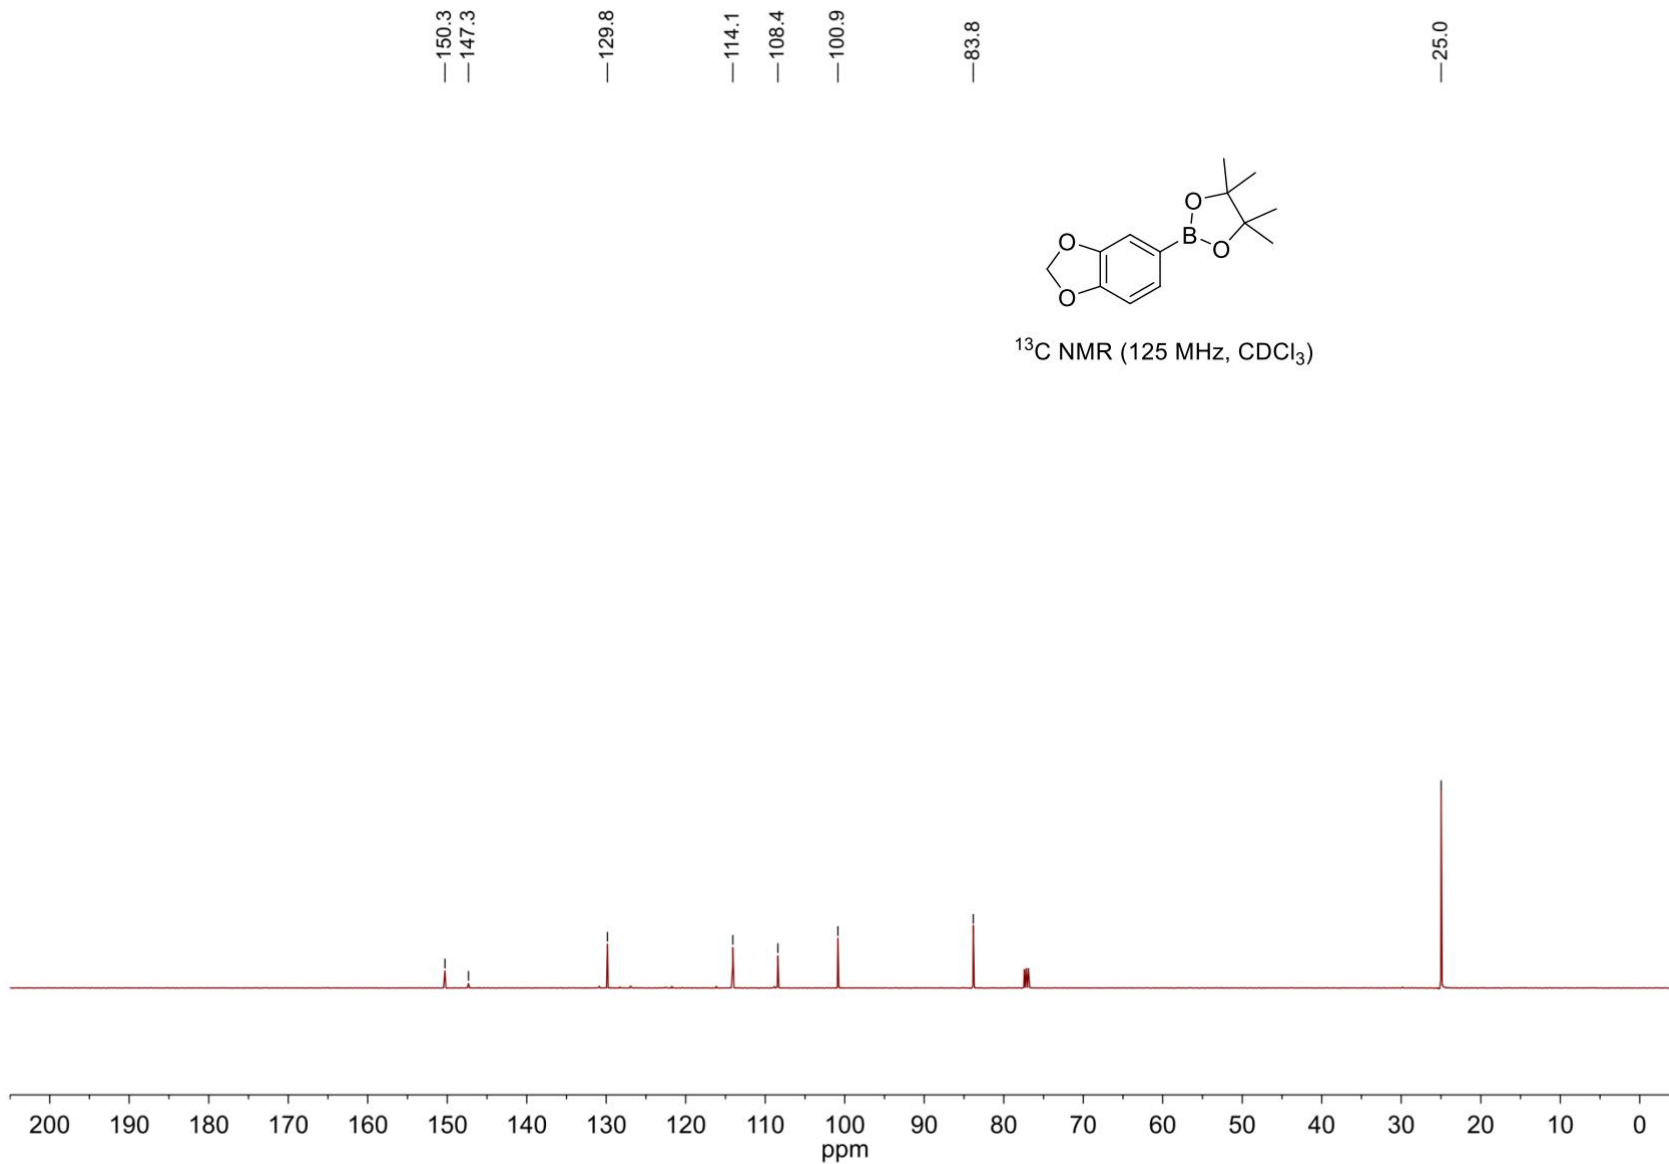

2-(4-(2-(4-Methoxyphenyl)propan-2-yl)phenyl)-4,4,5,5-tetramethyl-1,3,2-dioxaborolane (11)

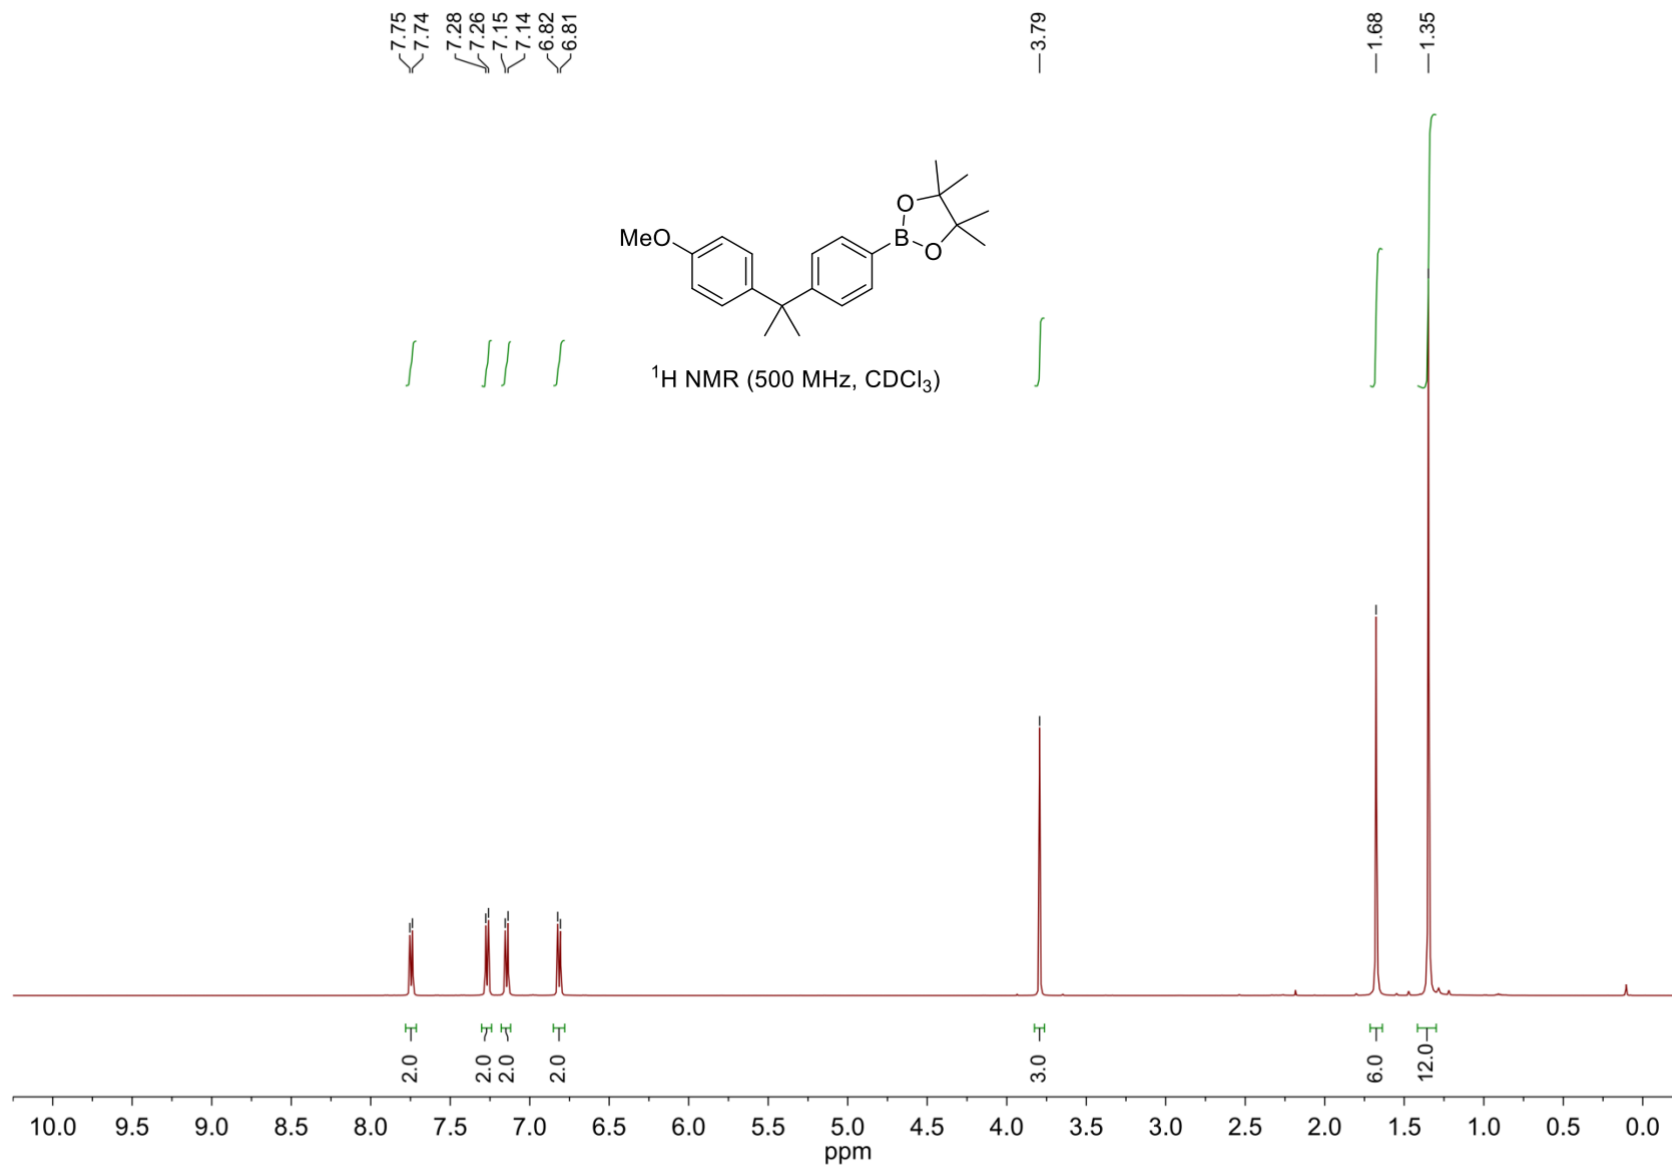

S295

2-(4-(2-(4-Methoxyphenyl)propan-2-yl)phenyl)-4,4,5,5-tetramethyl-1,3,2-dioxaborolane (11)

— 157.6  
— 154.4  
— 142.8  
— 134.7  
— 127.9  
— 126.3  
— 113.4  
— 83.8  
— 55.3  
— 42.7  
— 30.9  
— 25.0

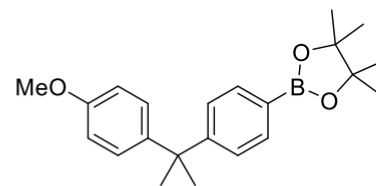

$^{13}\text{C}$  NMR (125 MHz,  $\text{CDCl}_3$ )

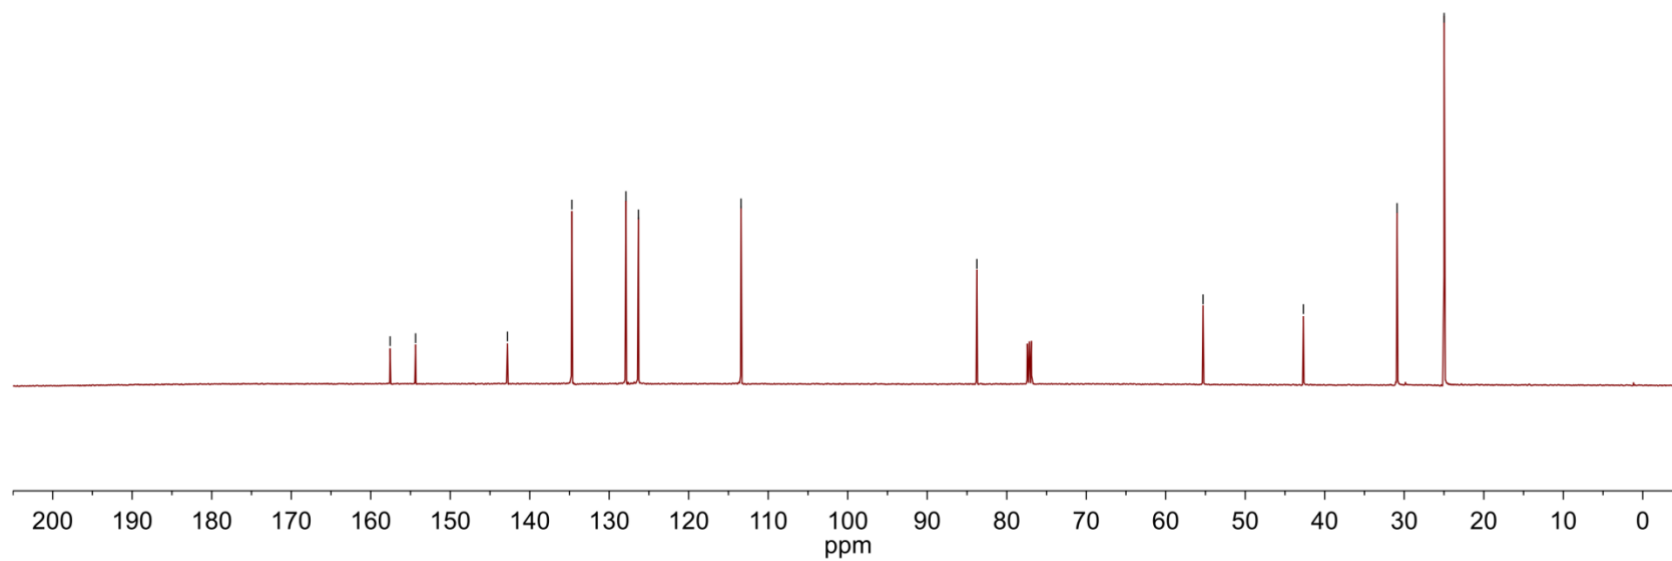



# 2-(3-Fluorophenyl)-4,4,5,5-tetramethyl-1,3,2-dioxaborolane (12)

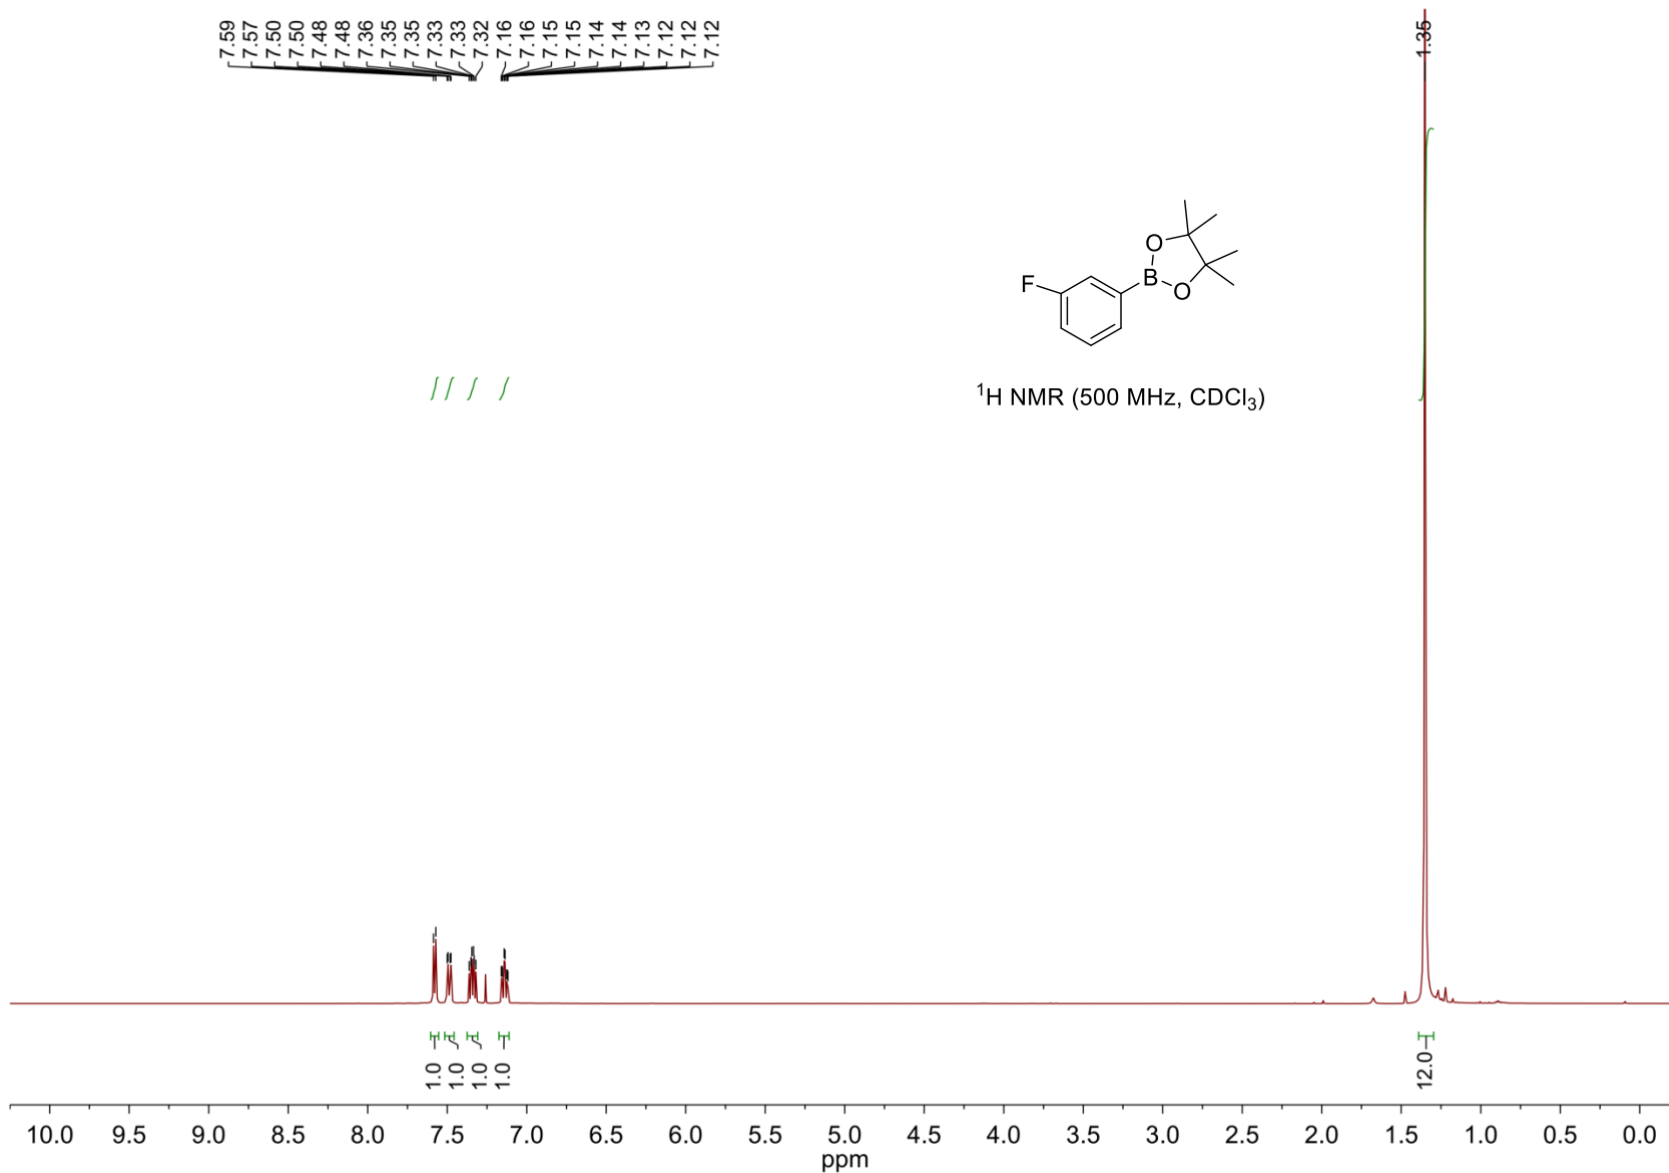

## 2-(3-Fluorophenyl)-4,4,5,5-tetramethyl-1,3,2-dioxaborolane (12)

~163.6  
~161.7

130.4  
130.4  
129.6  
129.6  
121.2  
121.0  
118.4  
118.2

—84.2

—25.0

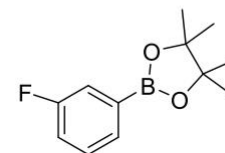

$^{13}\text{C}$  NMR (125 MHz,  $\text{CDCl}_3$ )

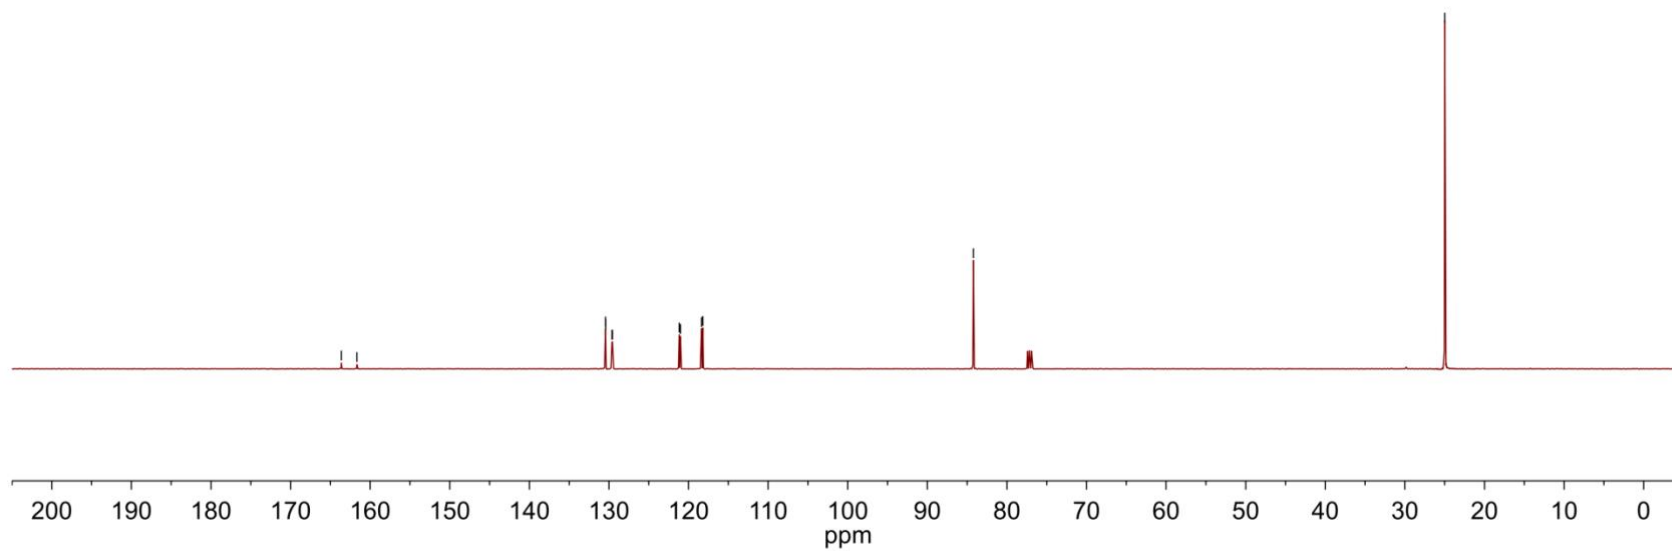

2-(3-Fluoro-4-methylphenyl)-4,4,5,5-tetramethyl-1,3,2-dioxaborolane (13)

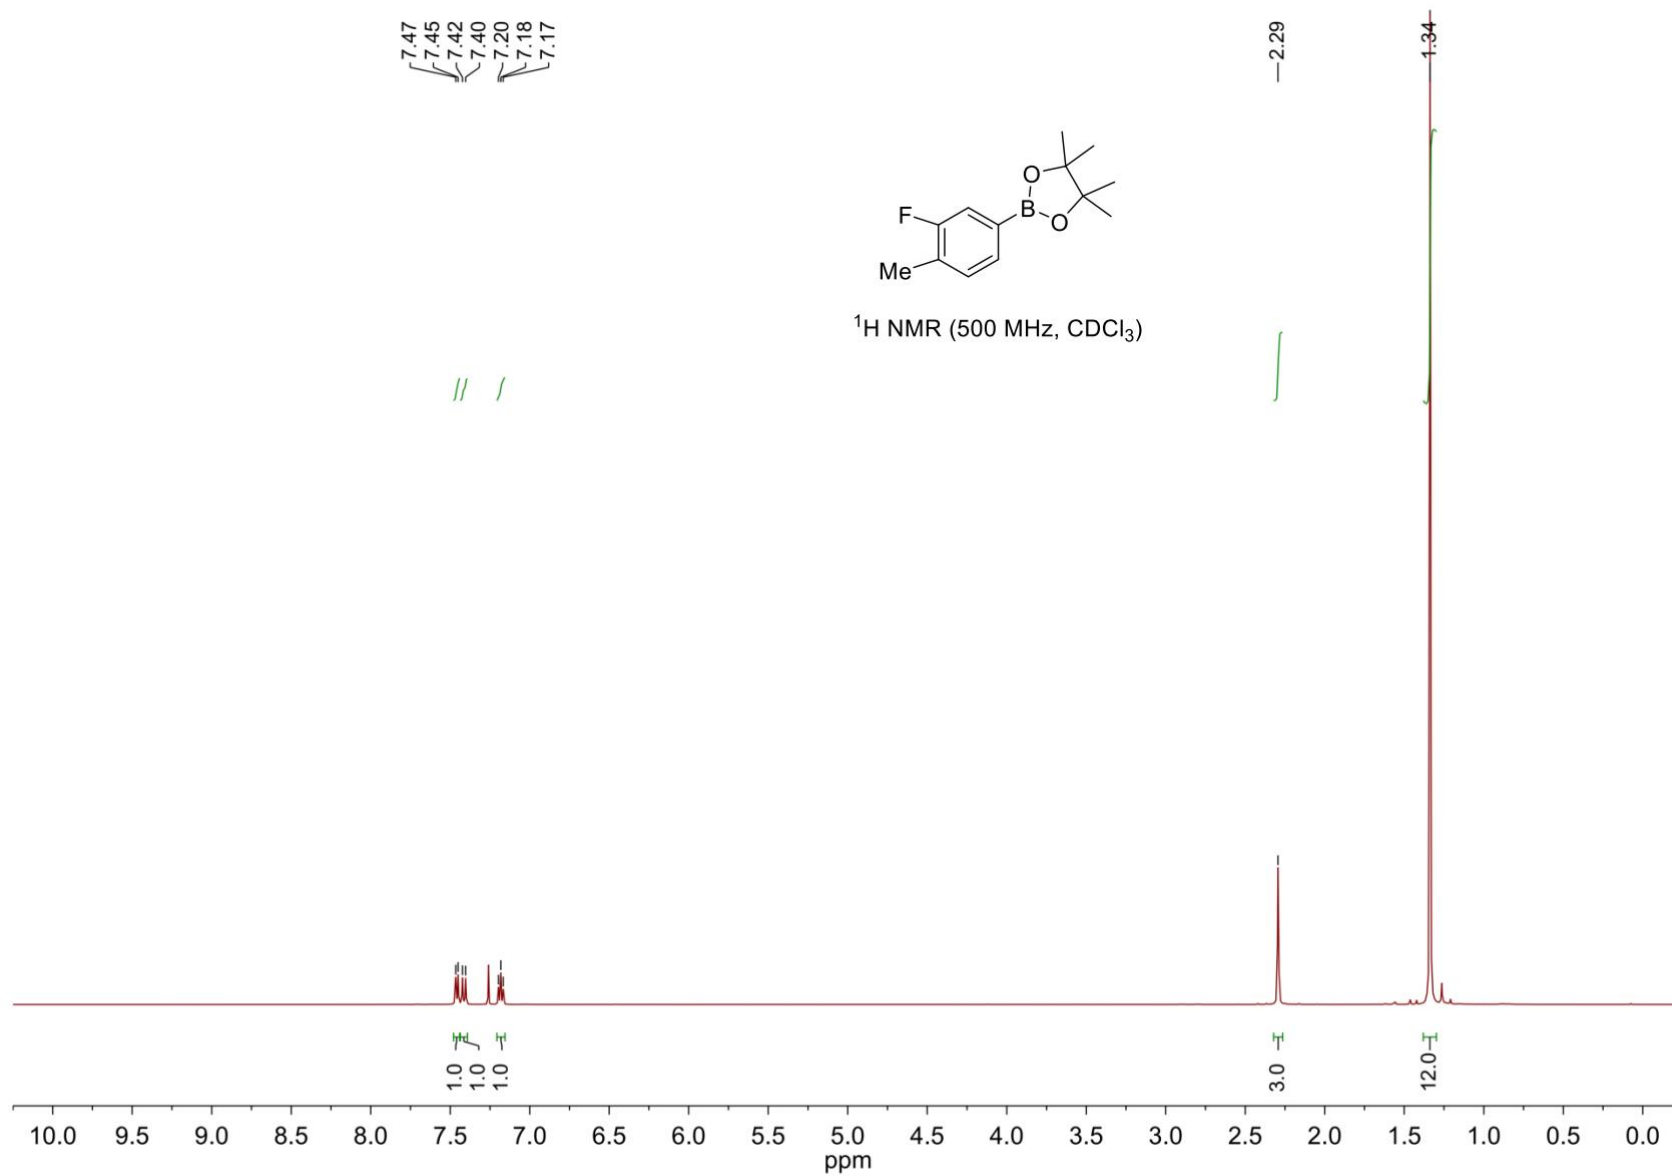

## 2-(3-Fluoro-4-methylphenyl)-4,4,5,5-tetramethyl-1,3,2-dioxaborolane (13)

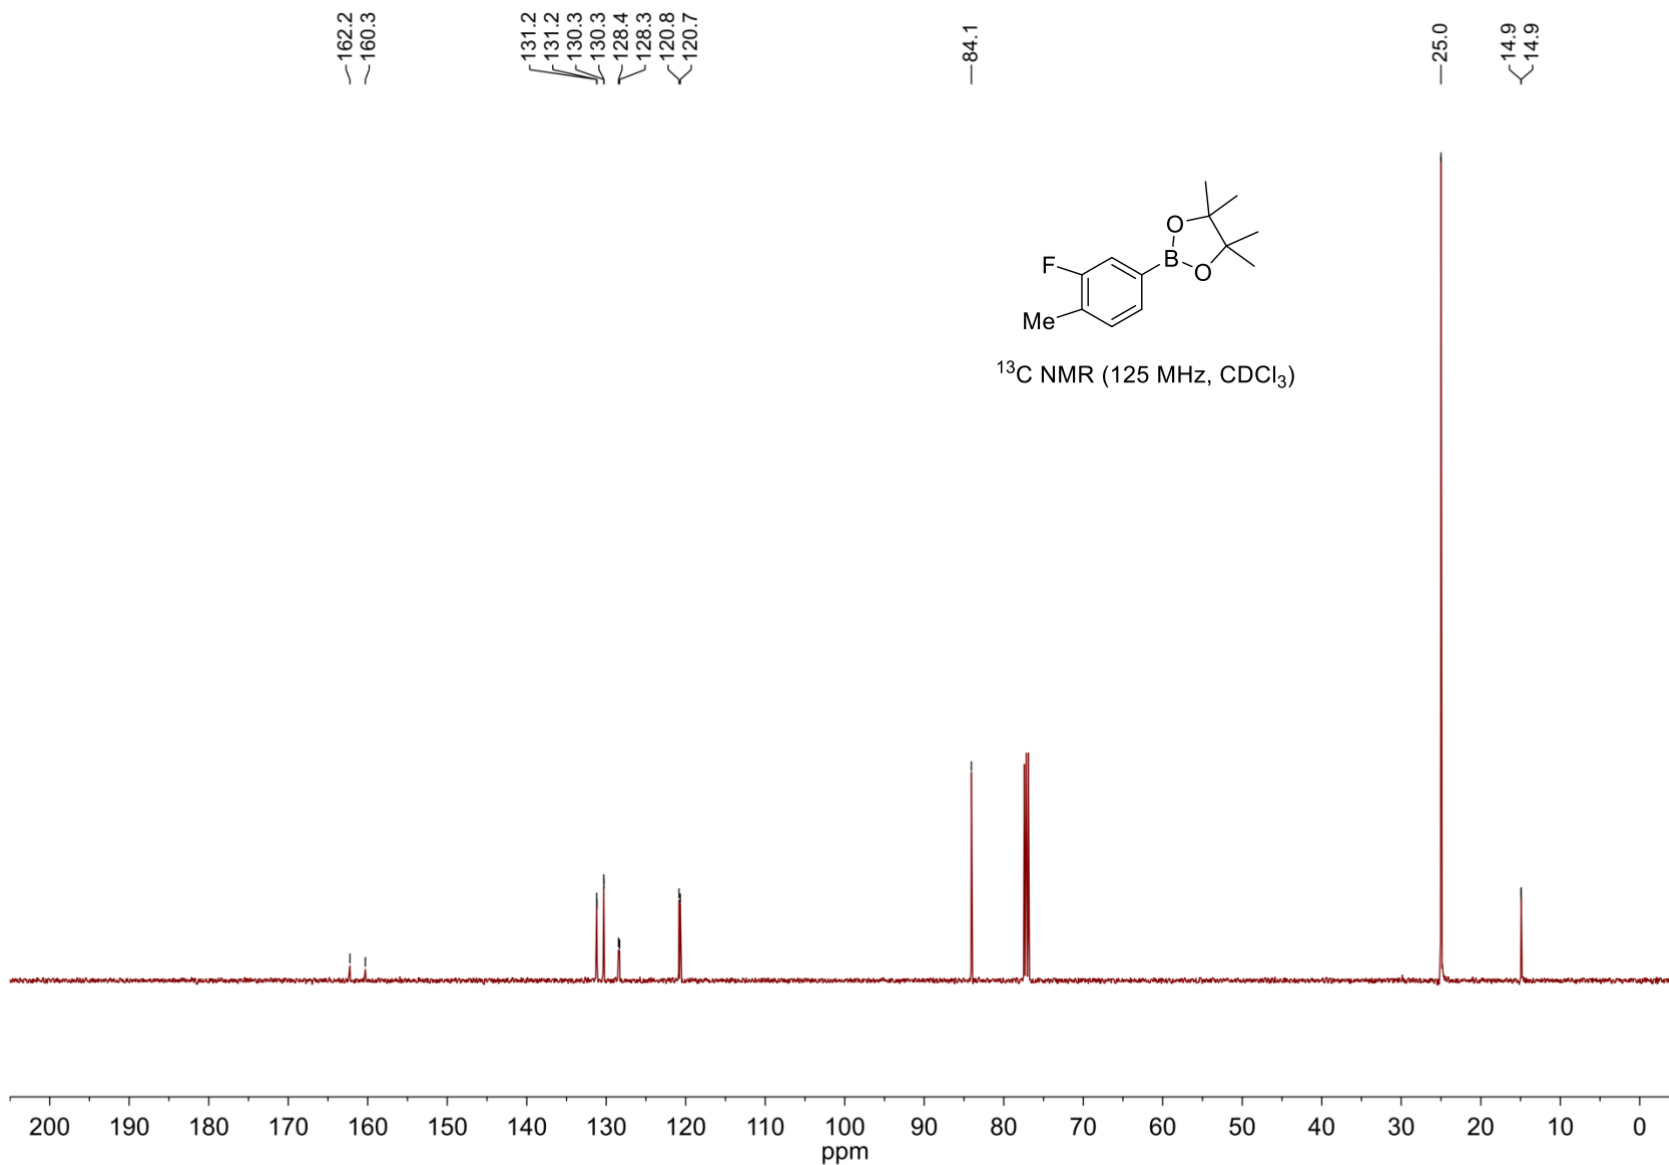

S300

**N-(3-(4,4,5,5-Tetramethyl-1,3,2-dioxaborolan-2-yl)phenyl)acetamide (14)**

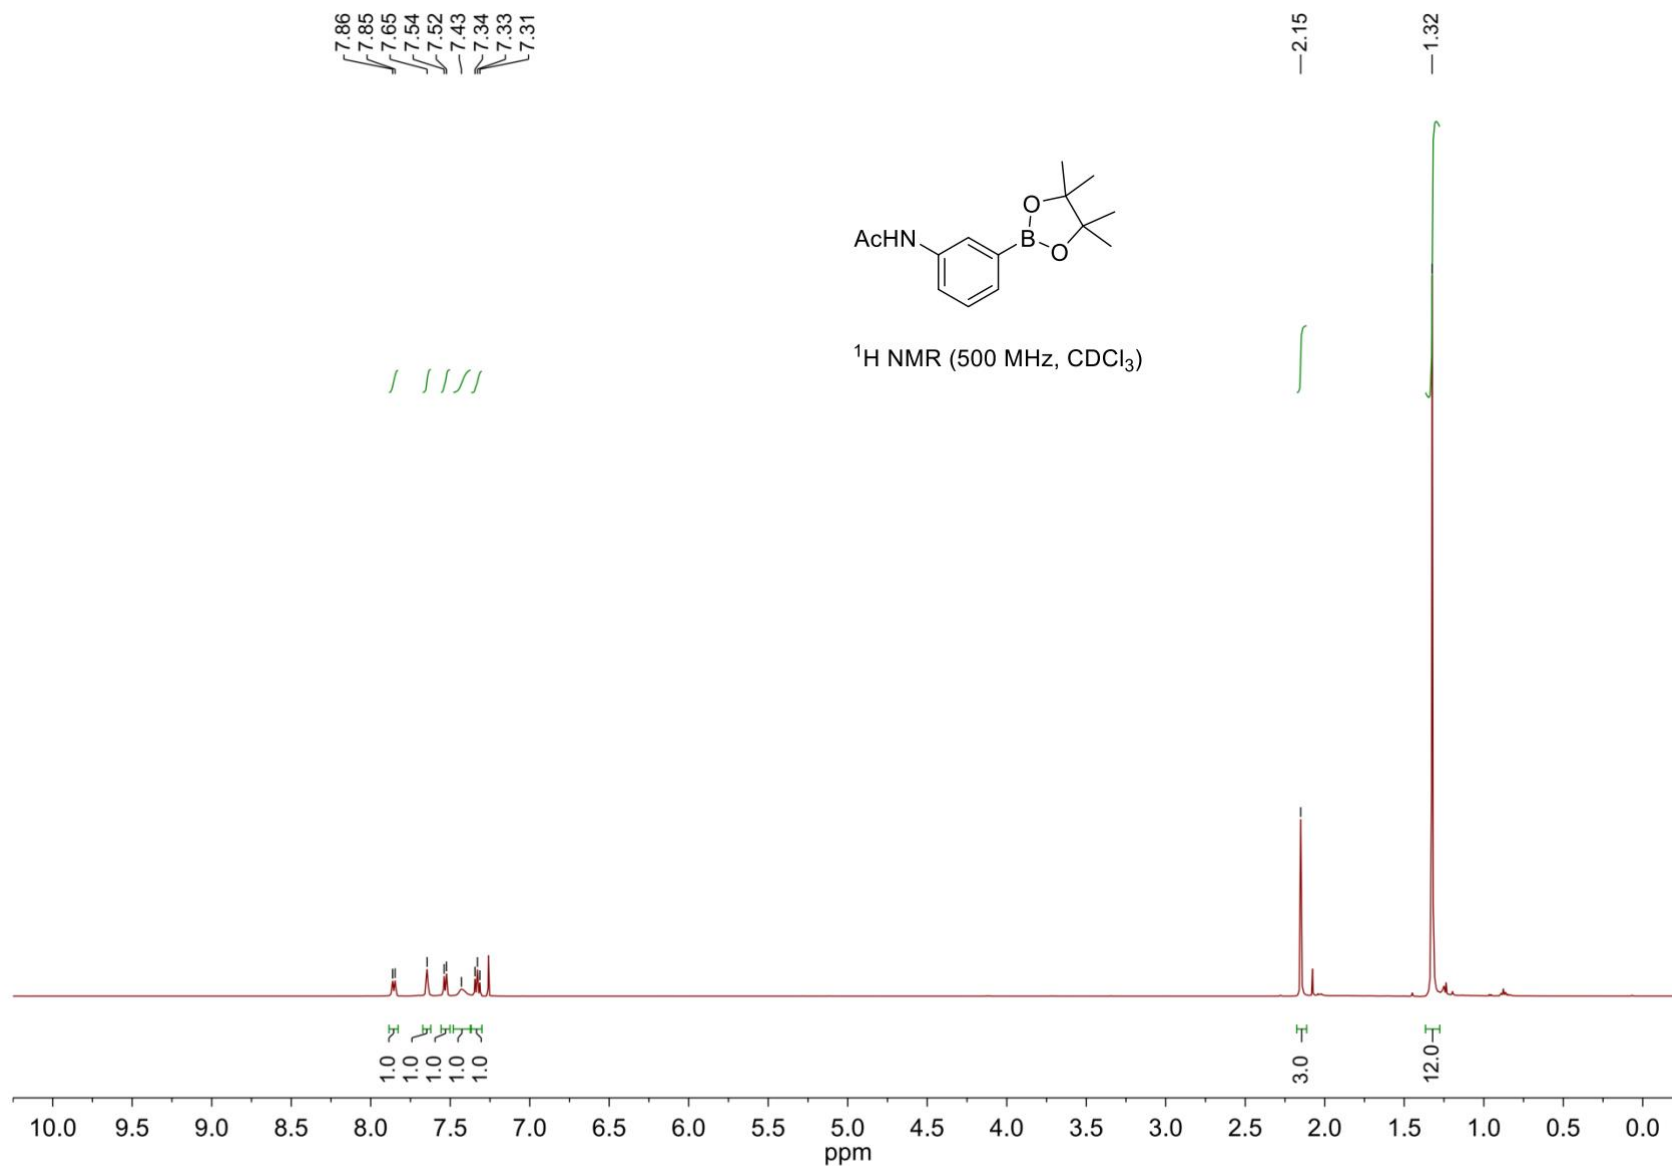

***N*-(3-(4,4,5,5-Tetramethyl-1,3,2-dioxaborolan-2-yl)phenyl)acetamide (14)**

— 168.6

— 137.5

— 130.7

— 128.7

— 126.0

— 123.3

— 84.1

— 25.0  
— 24.7

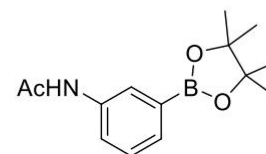

<sup>13</sup>C NMR (125 MHz, CDCl<sub>3</sub>)

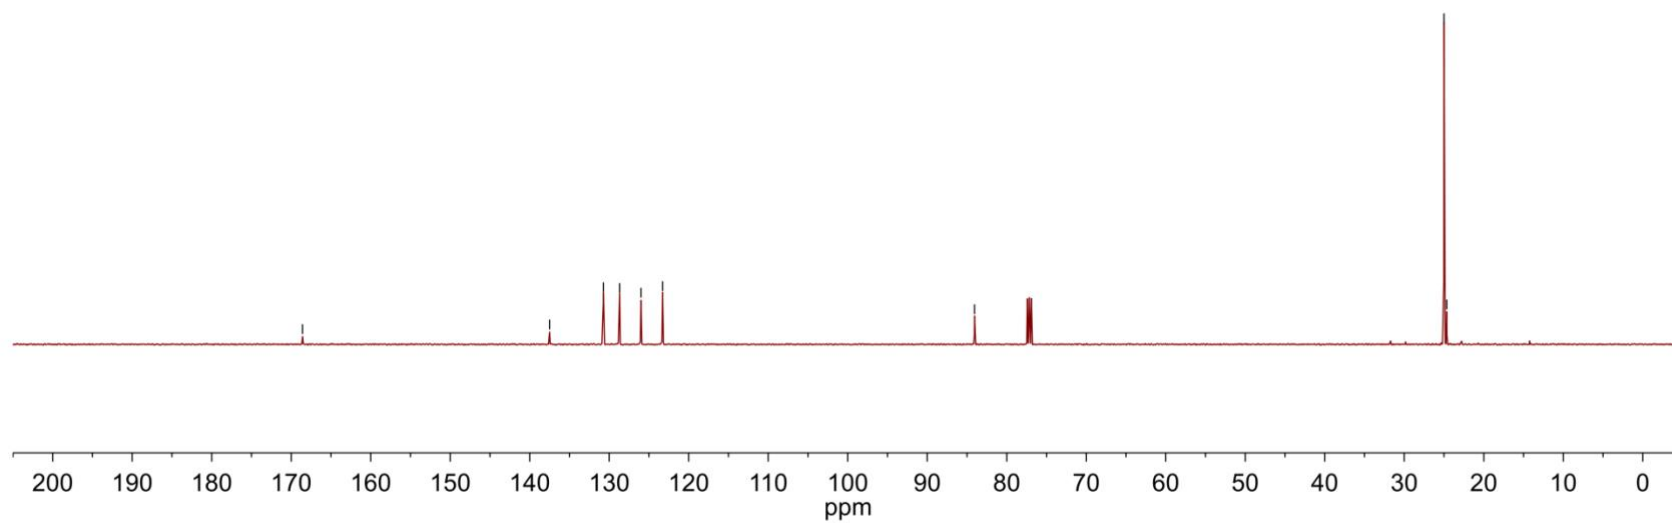

*tert*-Butyl (4-(4,4,5,5-tetramethyl-1,3,2-dioxaborolan-2-yl)phenyl)carbamate (15)

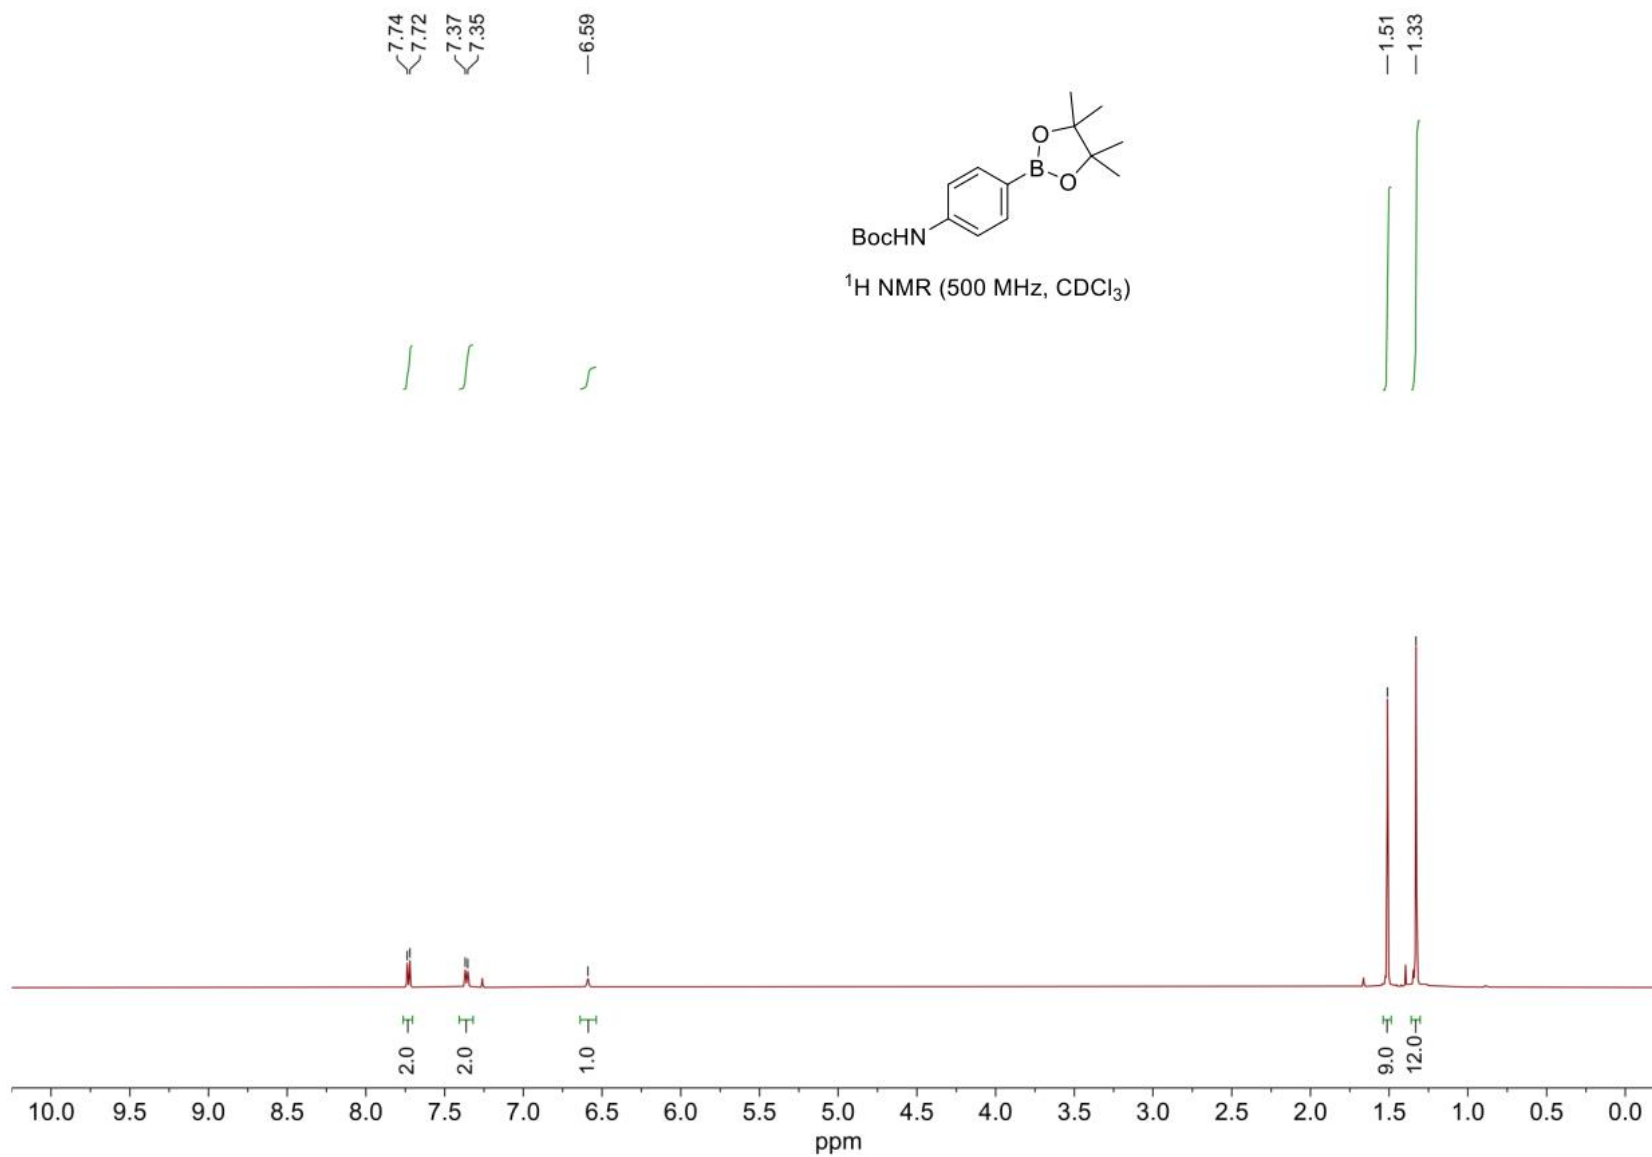

*tert*-Butyl (4-(4,4,5,5-tetramethyl-1,3,2-dioxaborolan-2-yl)phenyl)carbamate (15)

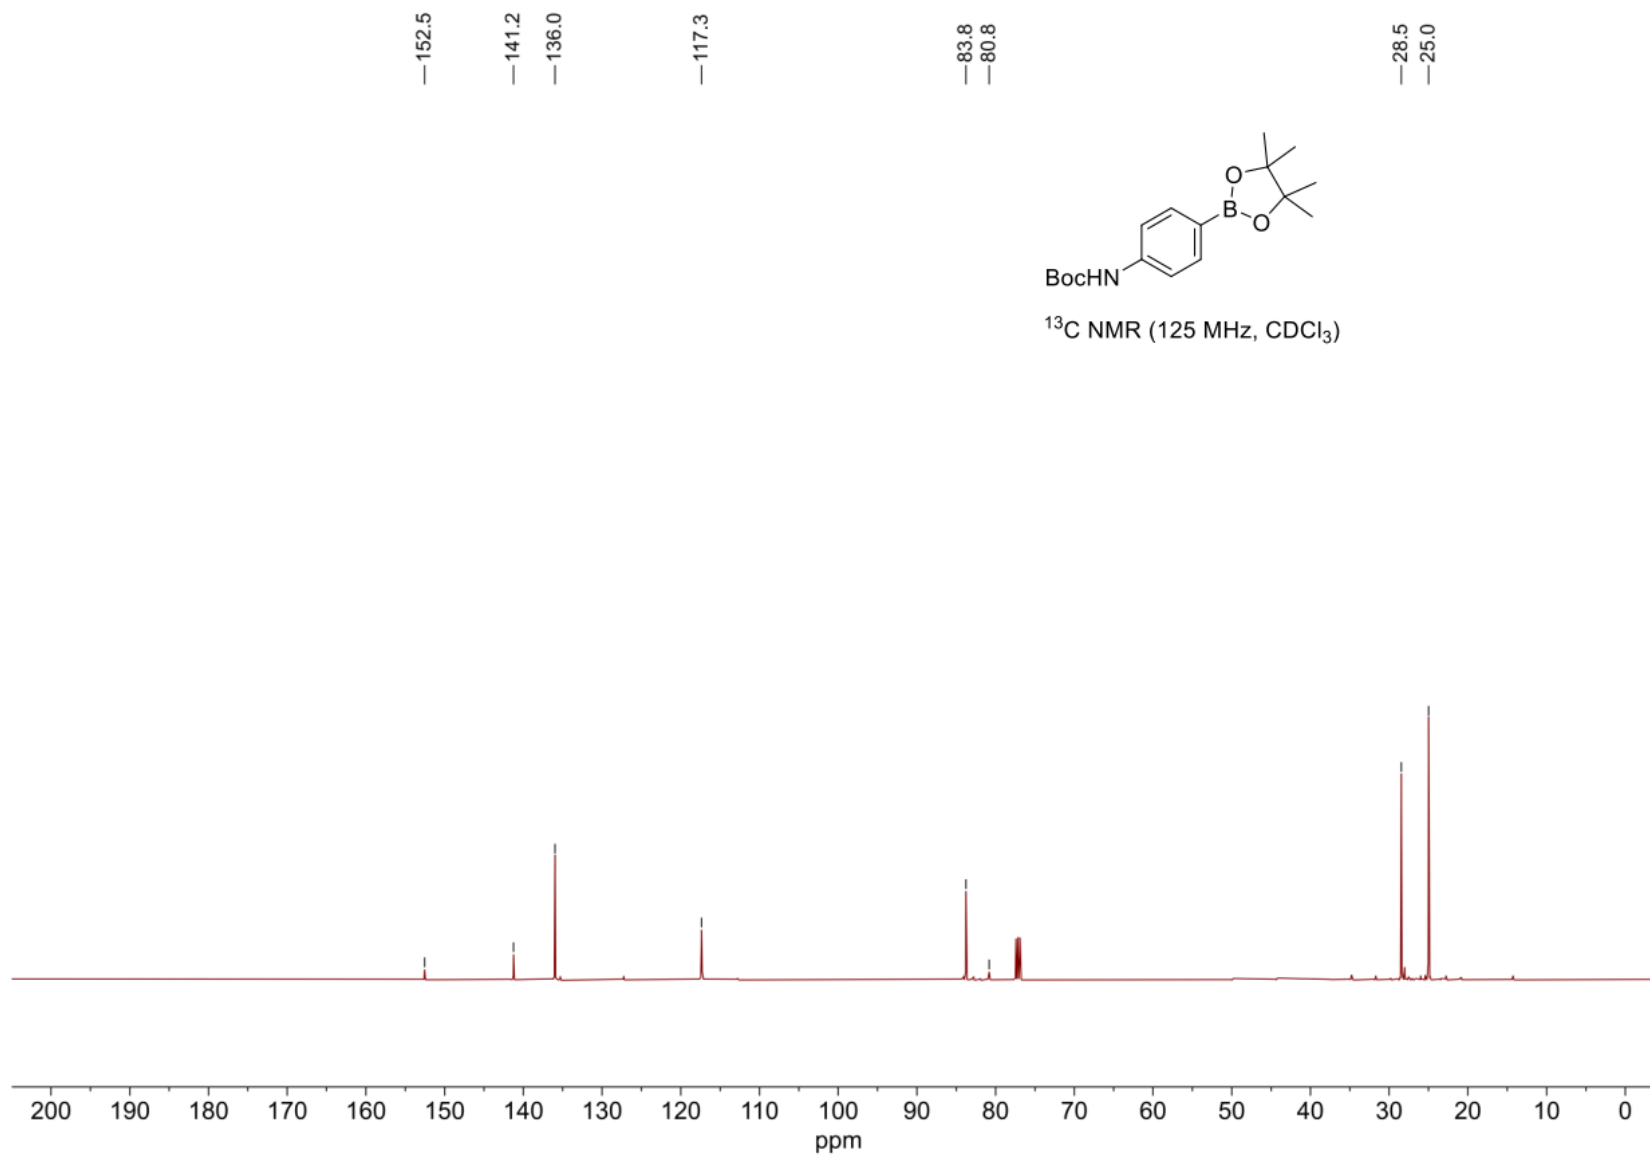



# 4-(4,4,5,5-Tetramethyl-1,3,2-dioxaborolan-2-yl)benzonitrile (16)

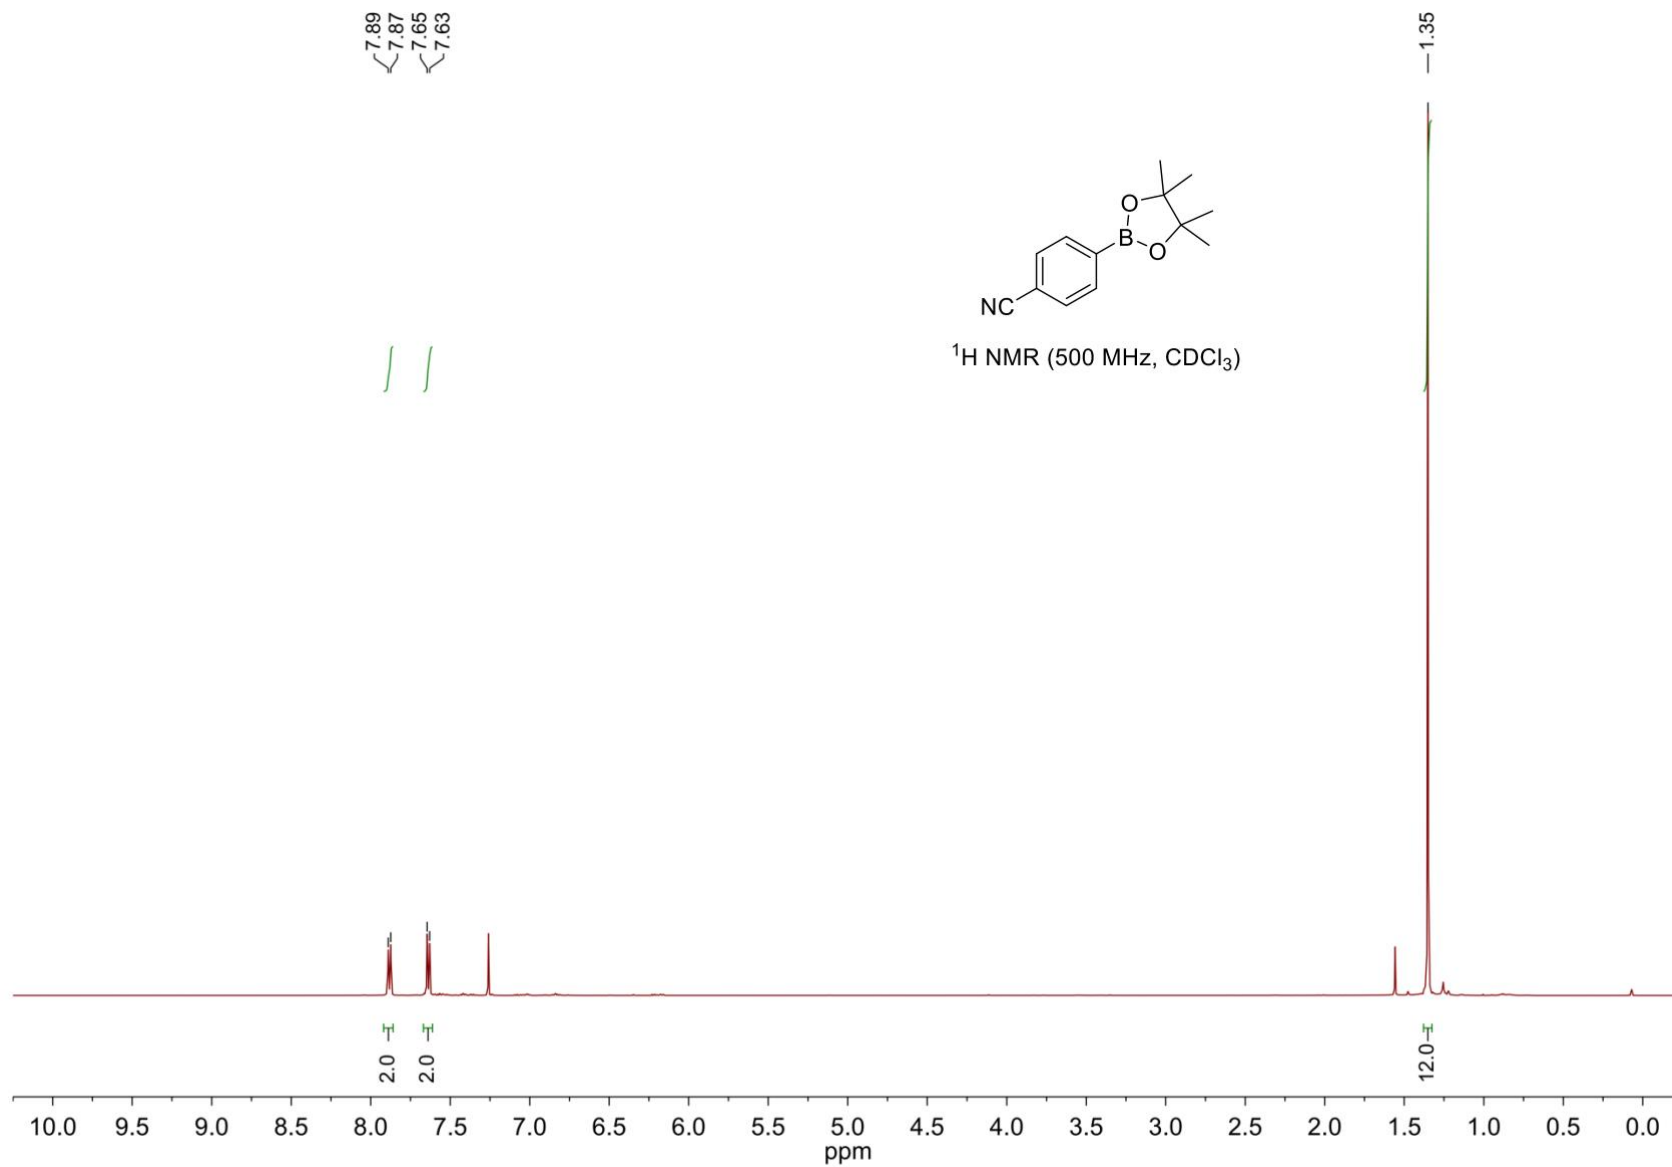

S305

# 4-(4,4,5,5-Tetramethyl-1,3,2-dioxaborolan-2-yl)benzonitrile (16)

—135.2

—131.3

—119.0

—114.7

—84.6

—25.0

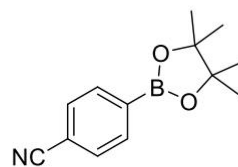

$^{13}\text{C}$  NMR (125 MHz,  $\text{CDCl}_3$ )

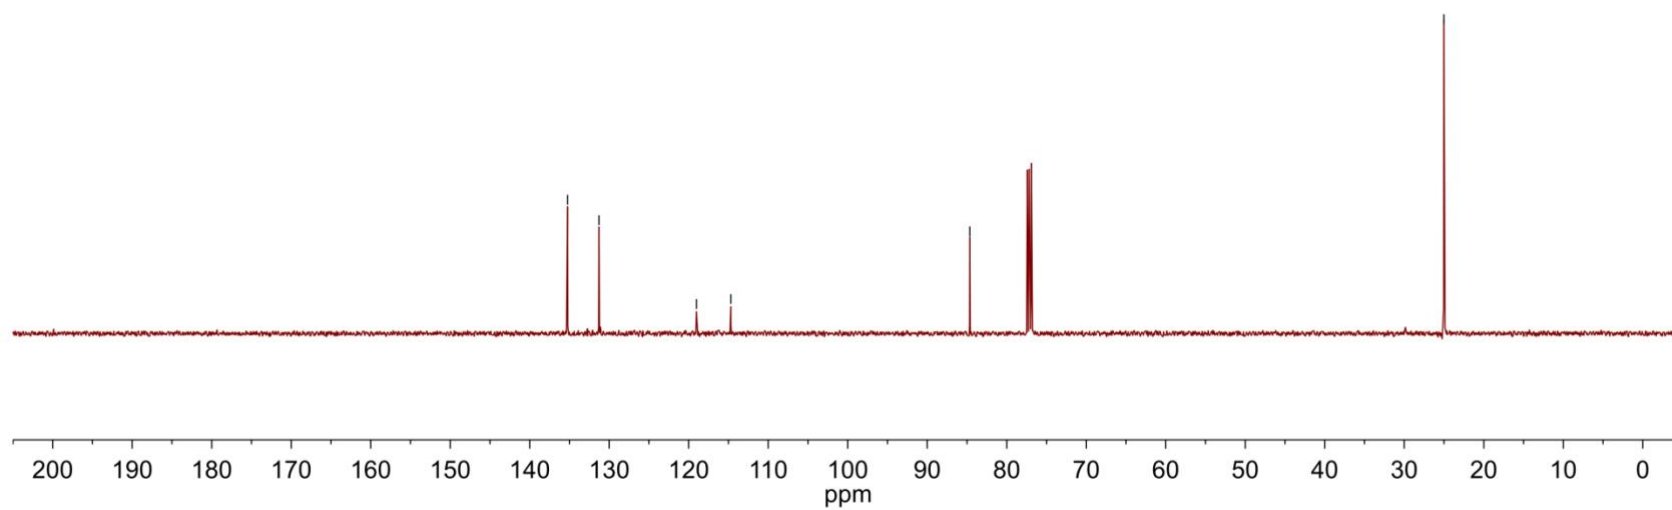

S306

# 1,4-Bis(4,4,5,5-tetramethyl-1,3,2-dioxaborolan-2-yl)benzene (17)

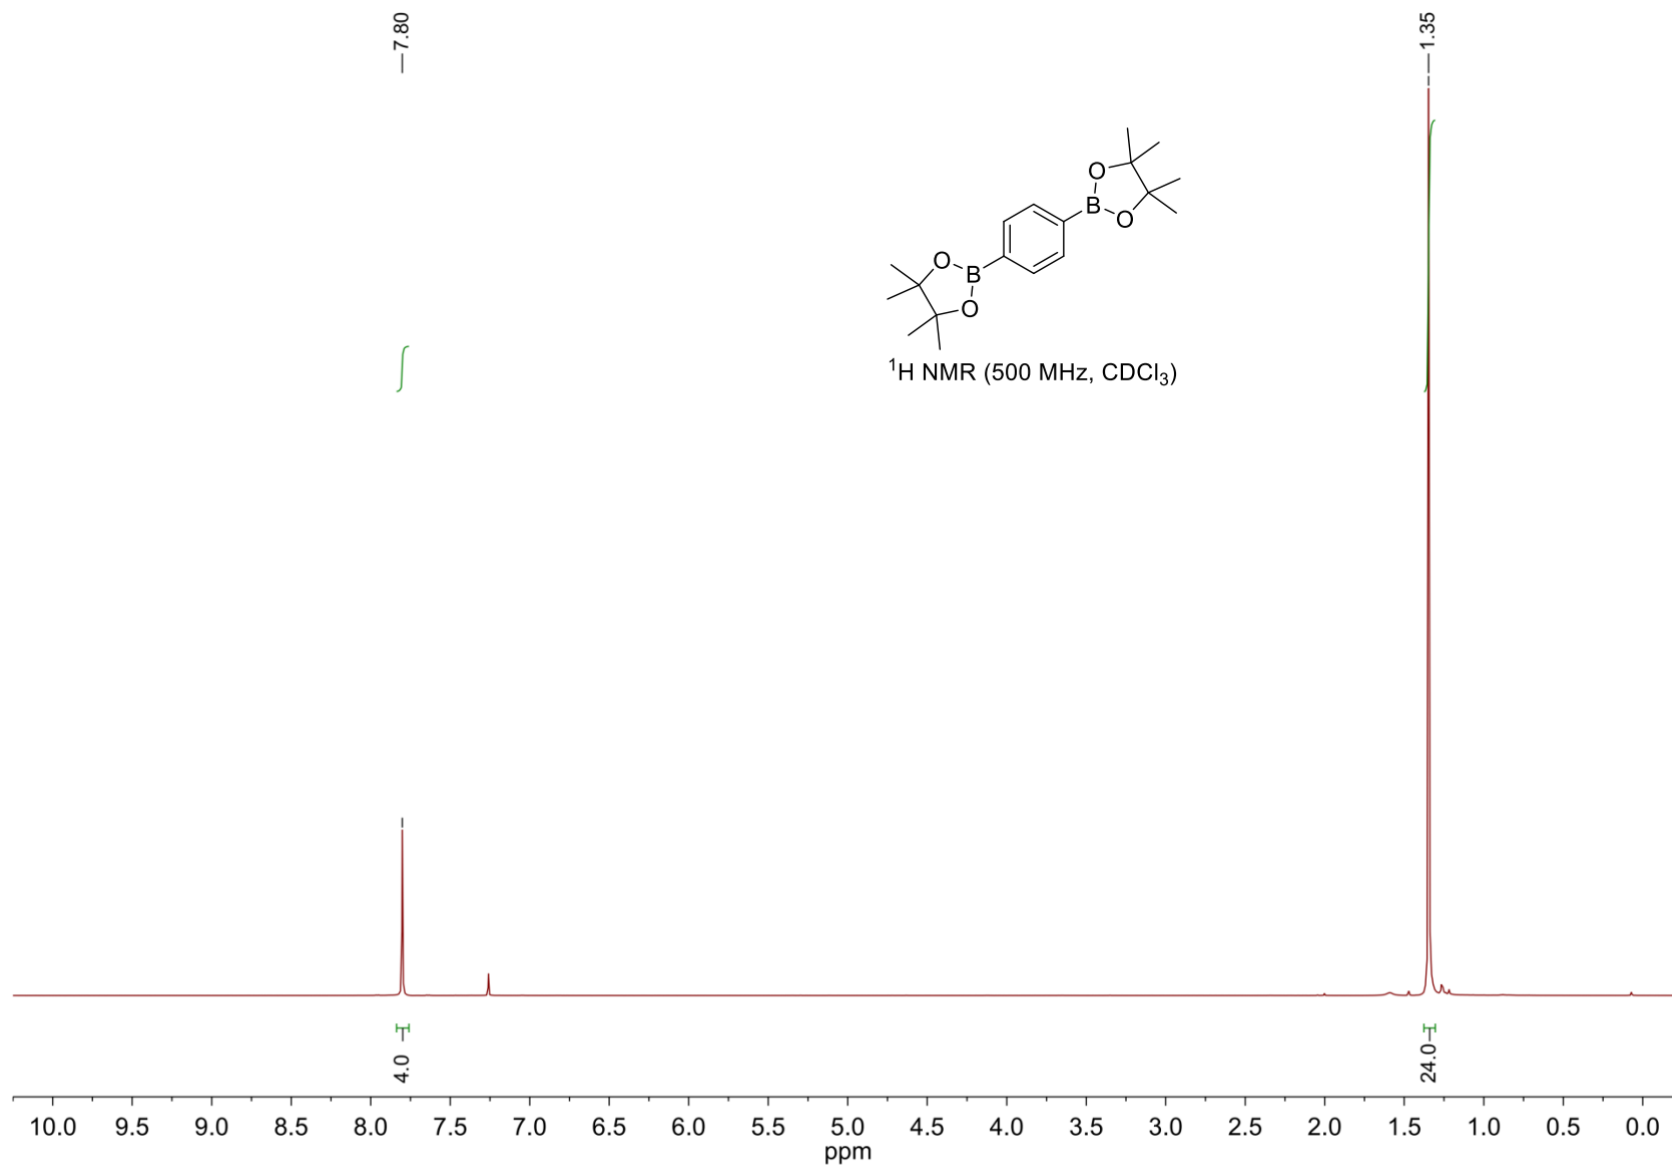

S307

# 1,4-Bis(4,4,5,5-tetramethyl-1,3,2-dioxaborolan-2-yl)benzene (17)

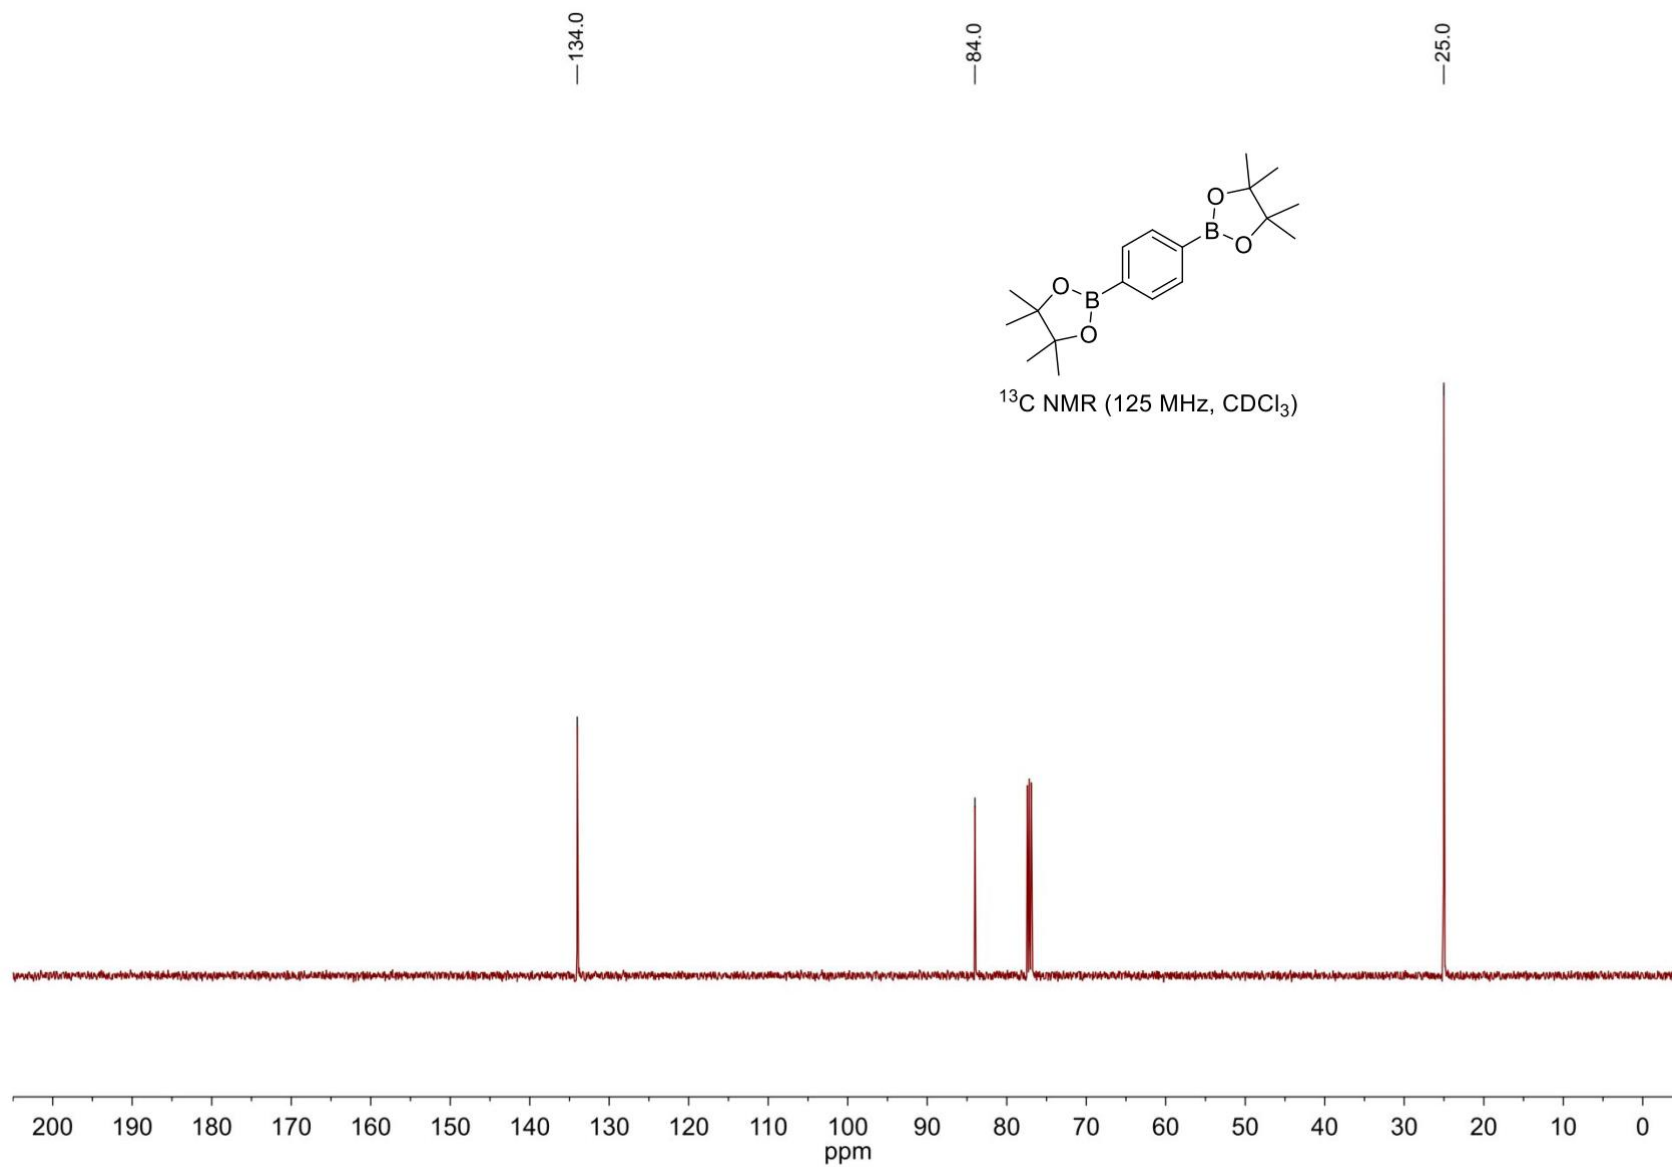

# Ethyl 4-(4,4,5,5-tetramethyl-1,3,2-dioxaborolan-2-yl)benzoate (18)

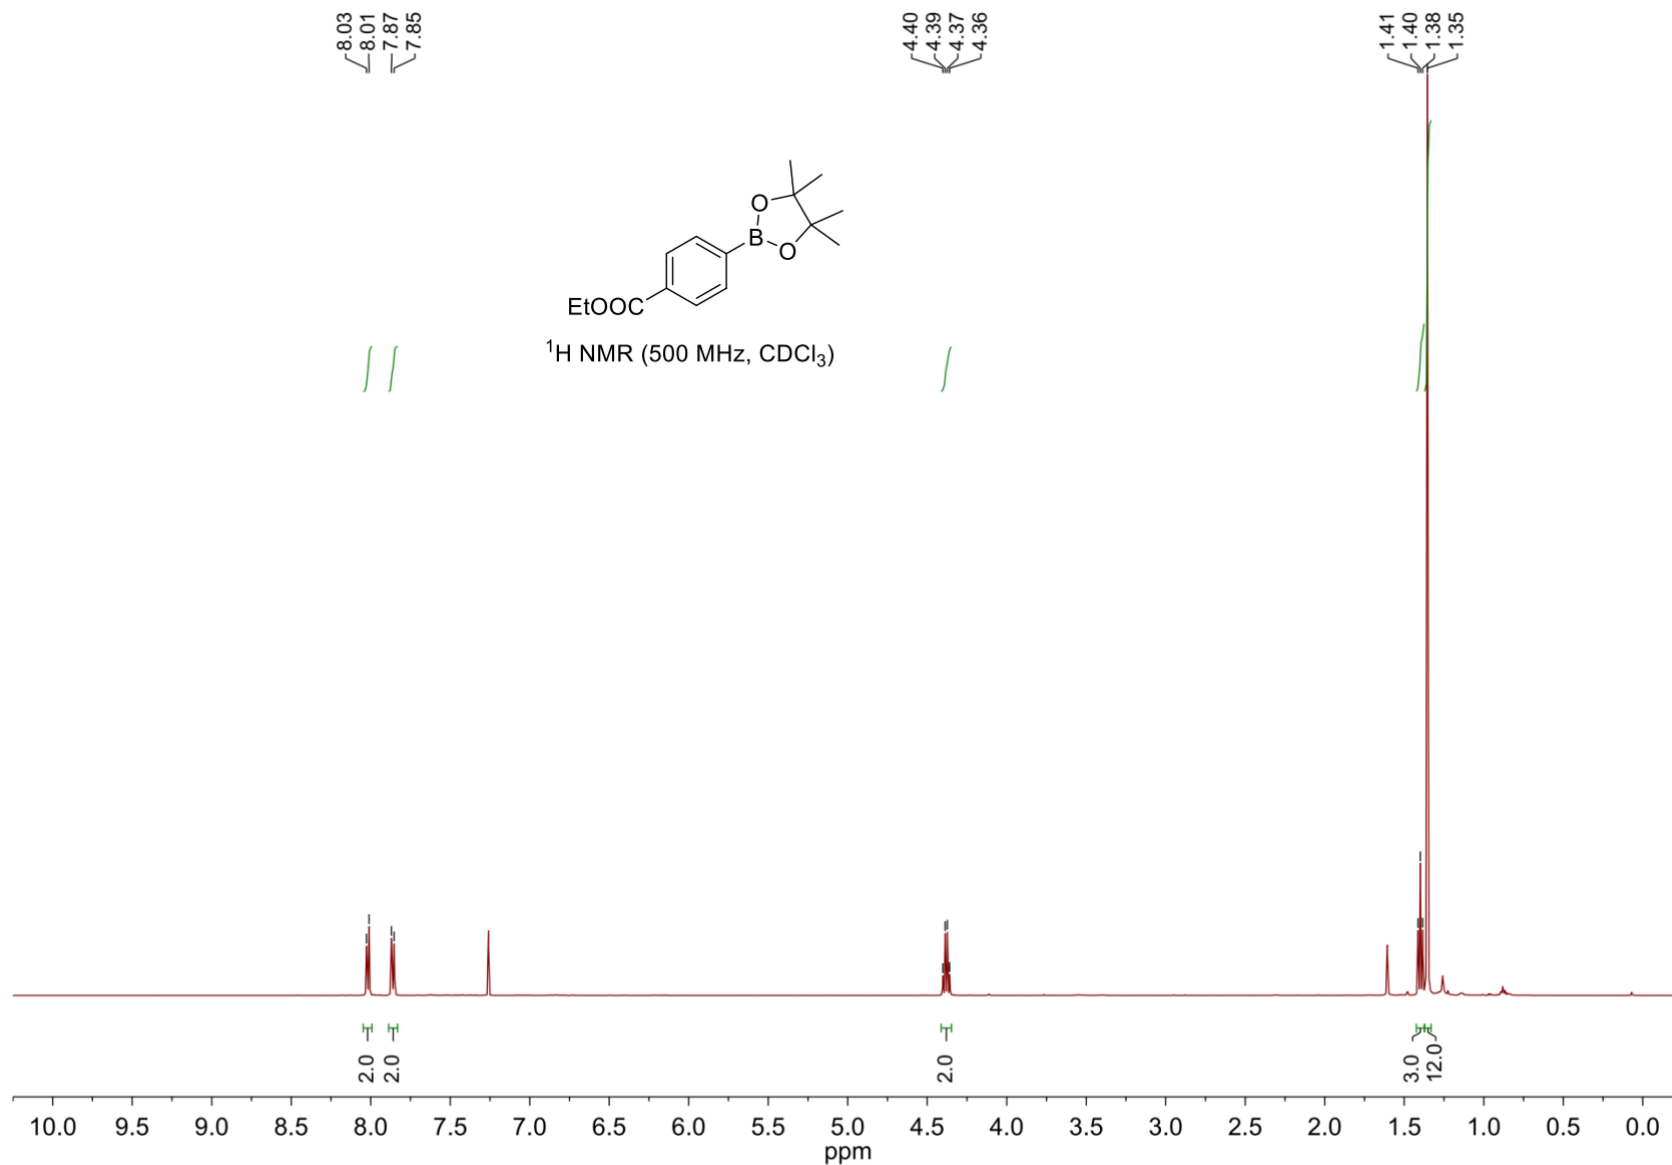

# Ethyl 4-(4,4,5,5-tetramethyl-1,3,2-dioxaborolan-2-yl)benzoate (18)

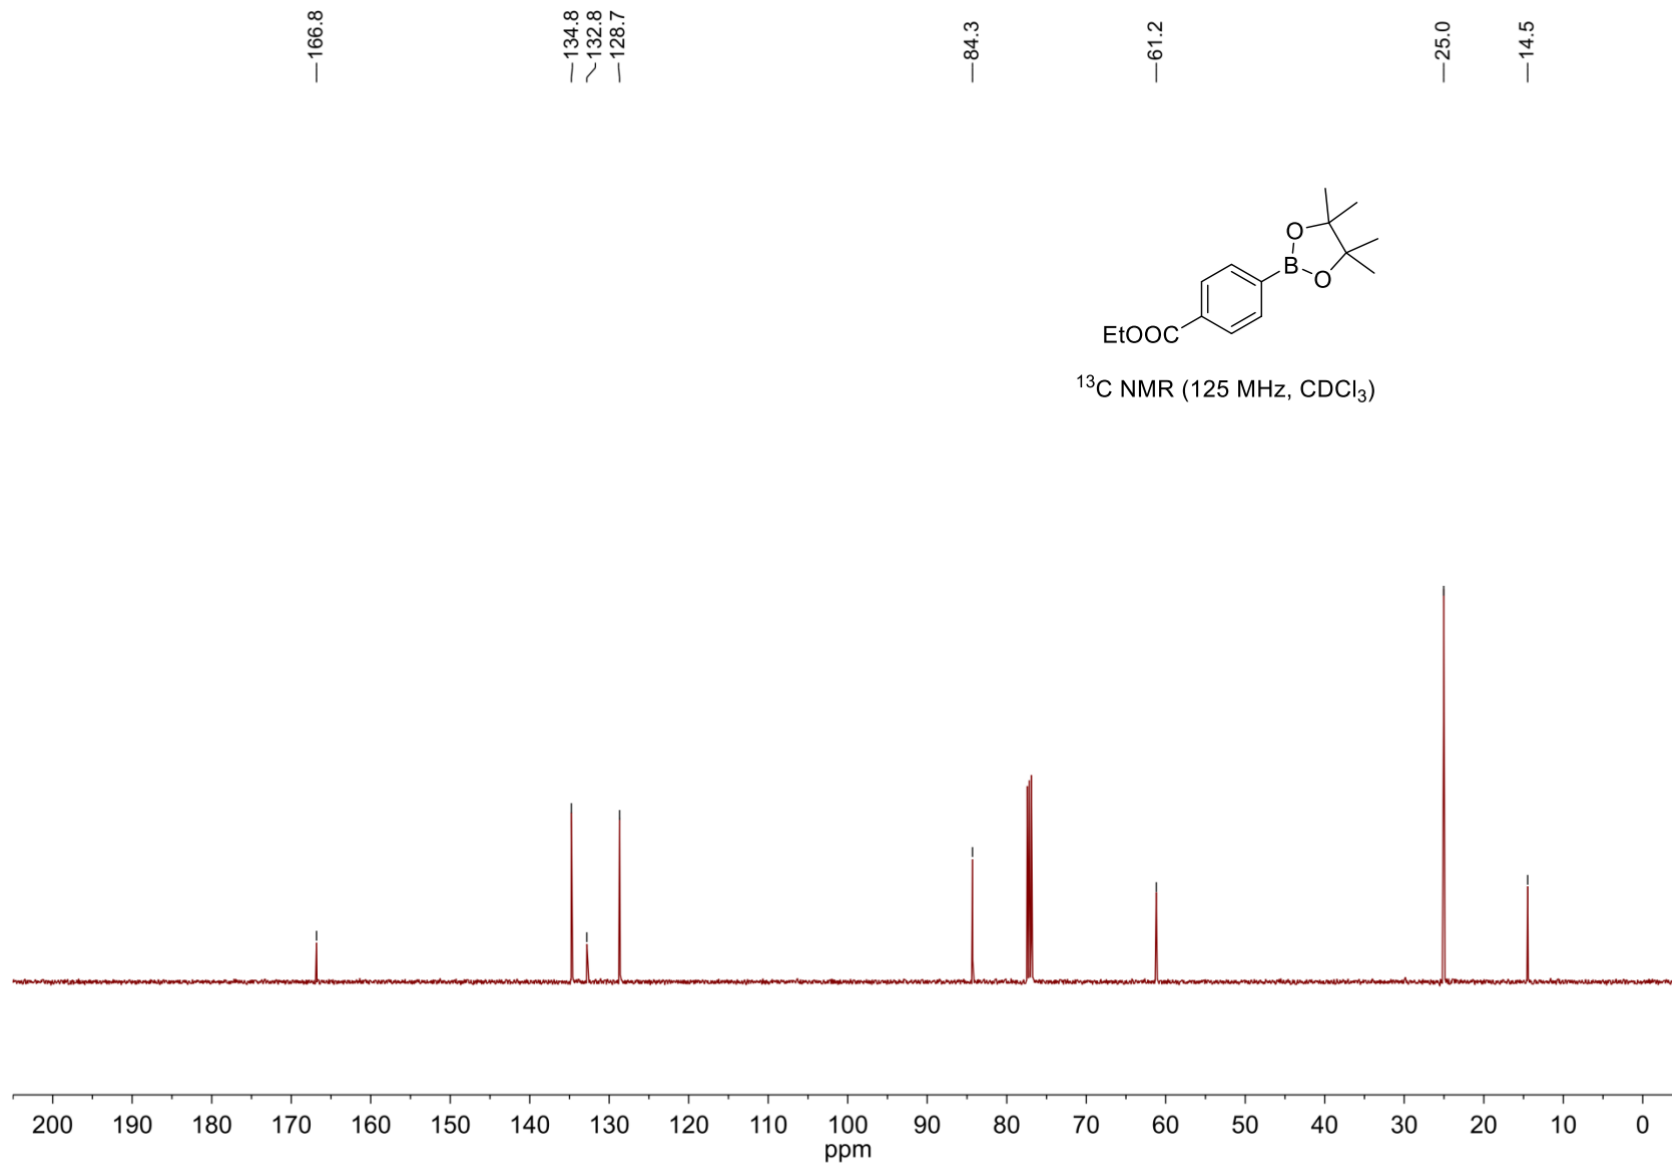

Methyl 2-(3-(trifluoro- $\lambda^4$ -boraneyl)phenyl)acetate, potassium salt (19)

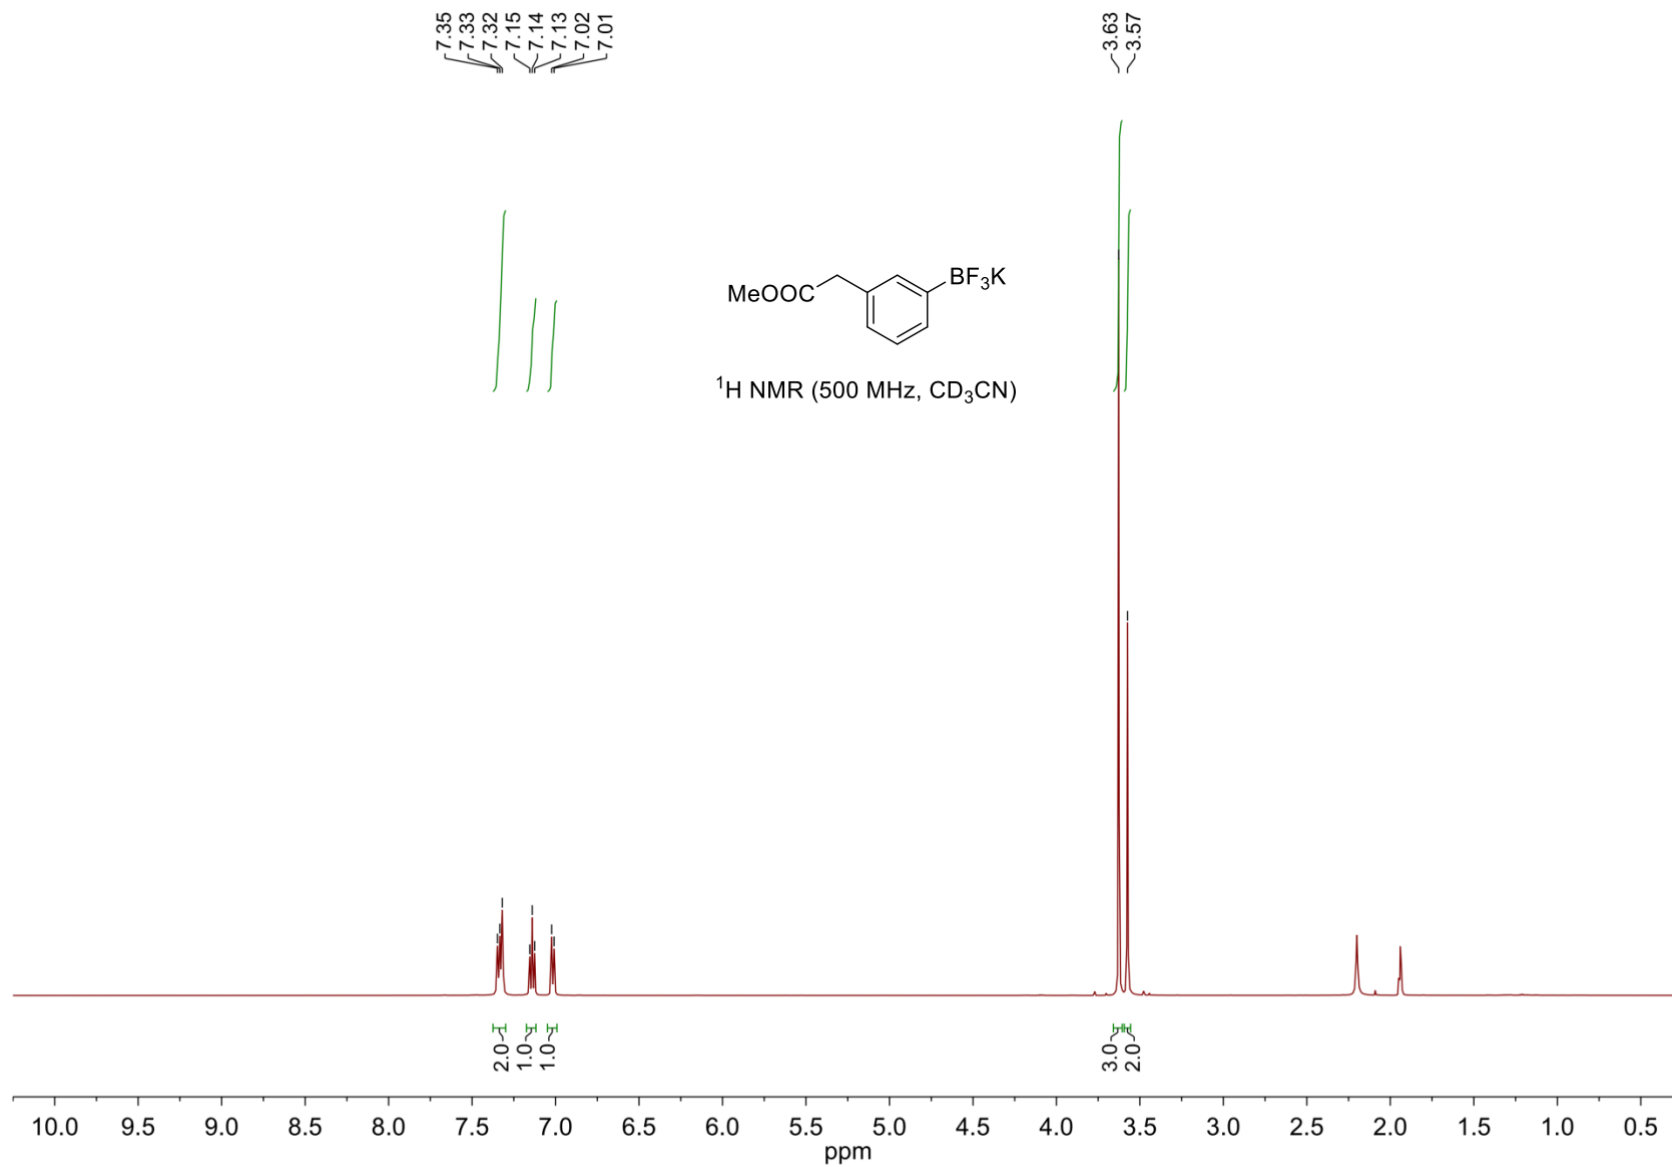

Methyl 2-(3-(trifluoro- $\lambda^4$ -boraneyl)phenyl)acetate, potassium salt (19)

—173.6

133.3  
133.3  
130.9  
127.7  
127.4

—52.2

—41.8

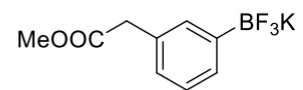

$^{13}\text{C}$  NMR (125 MHz,  $\text{CD}_3\text{CN}$ )

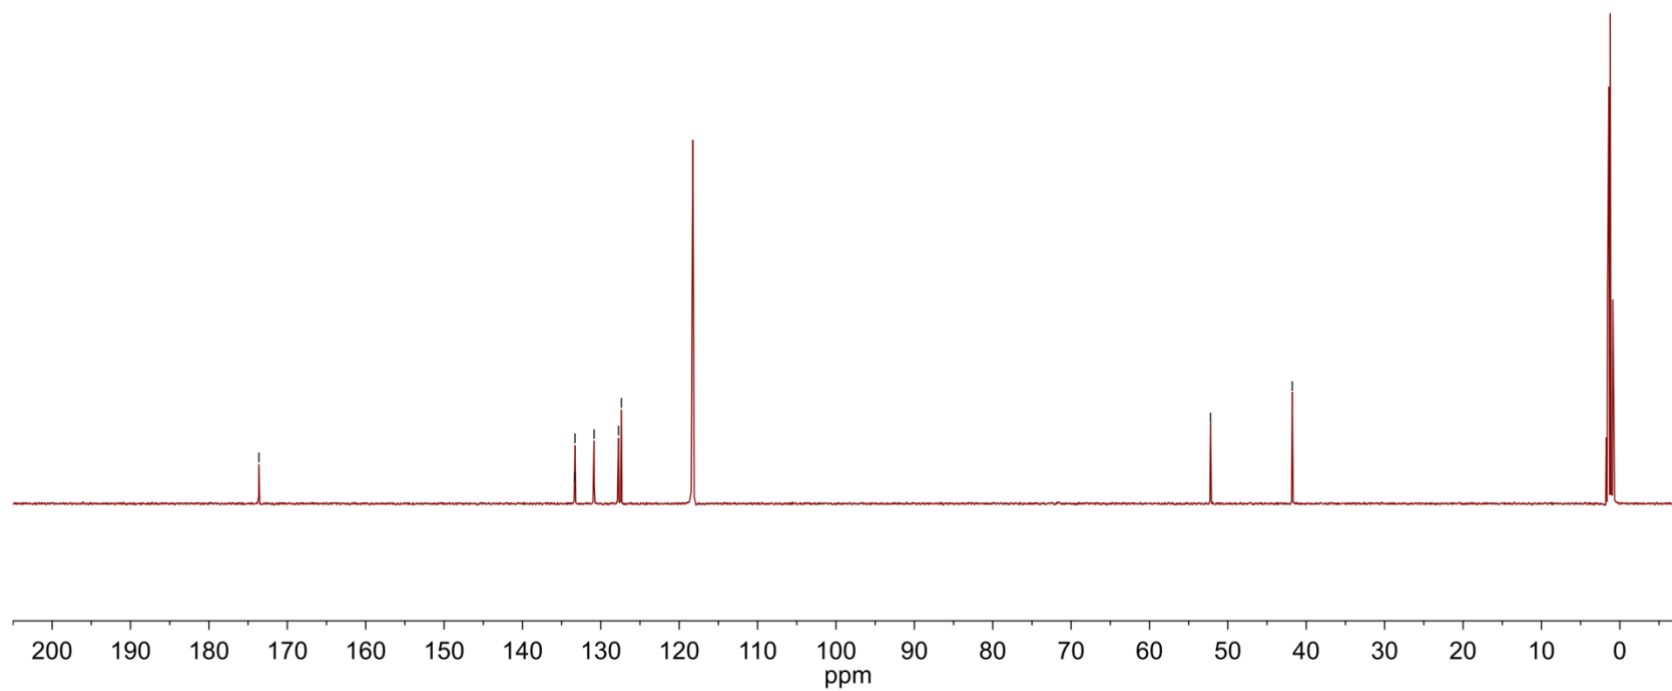

S312



# Methyl 3-(2-(4,4,5,5-tetramethyl-1,3,2-dioxaborolan-2-yl)phenyl)propanoate (20)

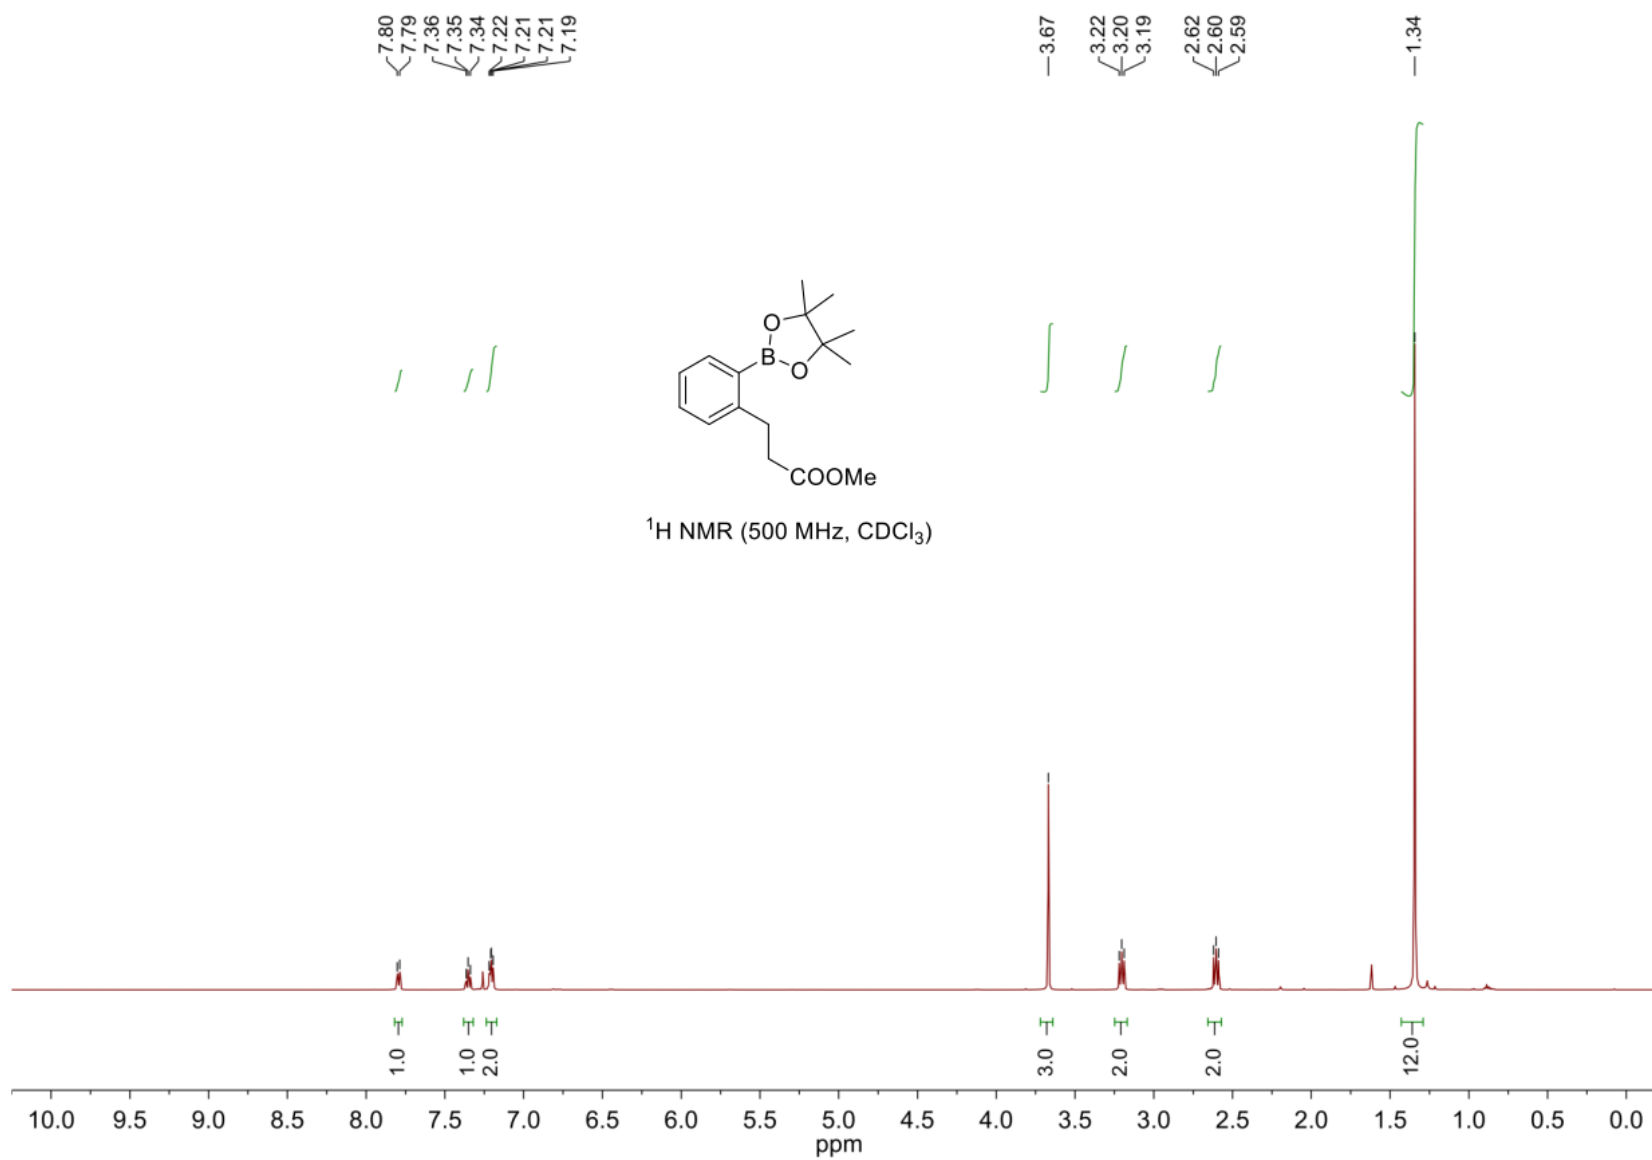

# Methyl 3-(2-(4,4,5,5-tetramethyl-1,3,2-dioxaborolan-2-yl)phenyl)propanoate (20)

—173.9                    —147.7                    —136.4  
                                 —131.2  
                                 —129.4  
                                 —125.7                    —83.7                    —51.6                    —37.2  
                                 —31.3                    —25.0

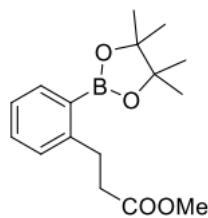

$^{13}\text{C}$  NMR (125 MHz,  $\text{CDCl}_3$ )

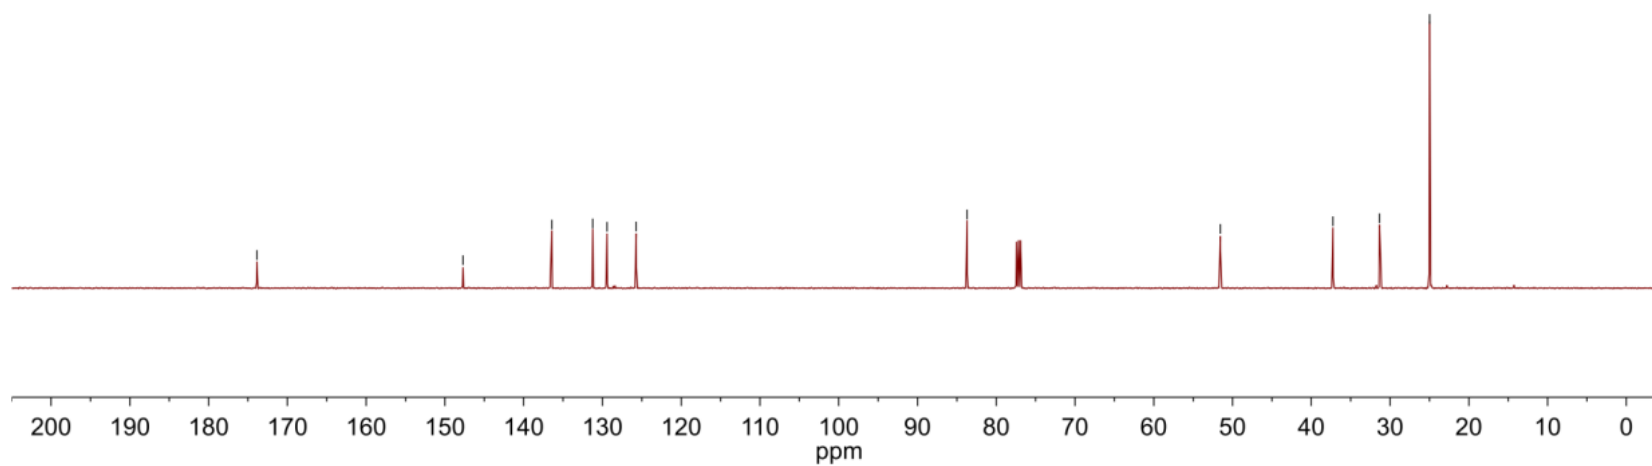

1-(Piperidin-1-yl)-2-(4-(trifluoro- $\lambda^4$ -boraneyl)phenyl)ethan-1-one, potassium salt (21)

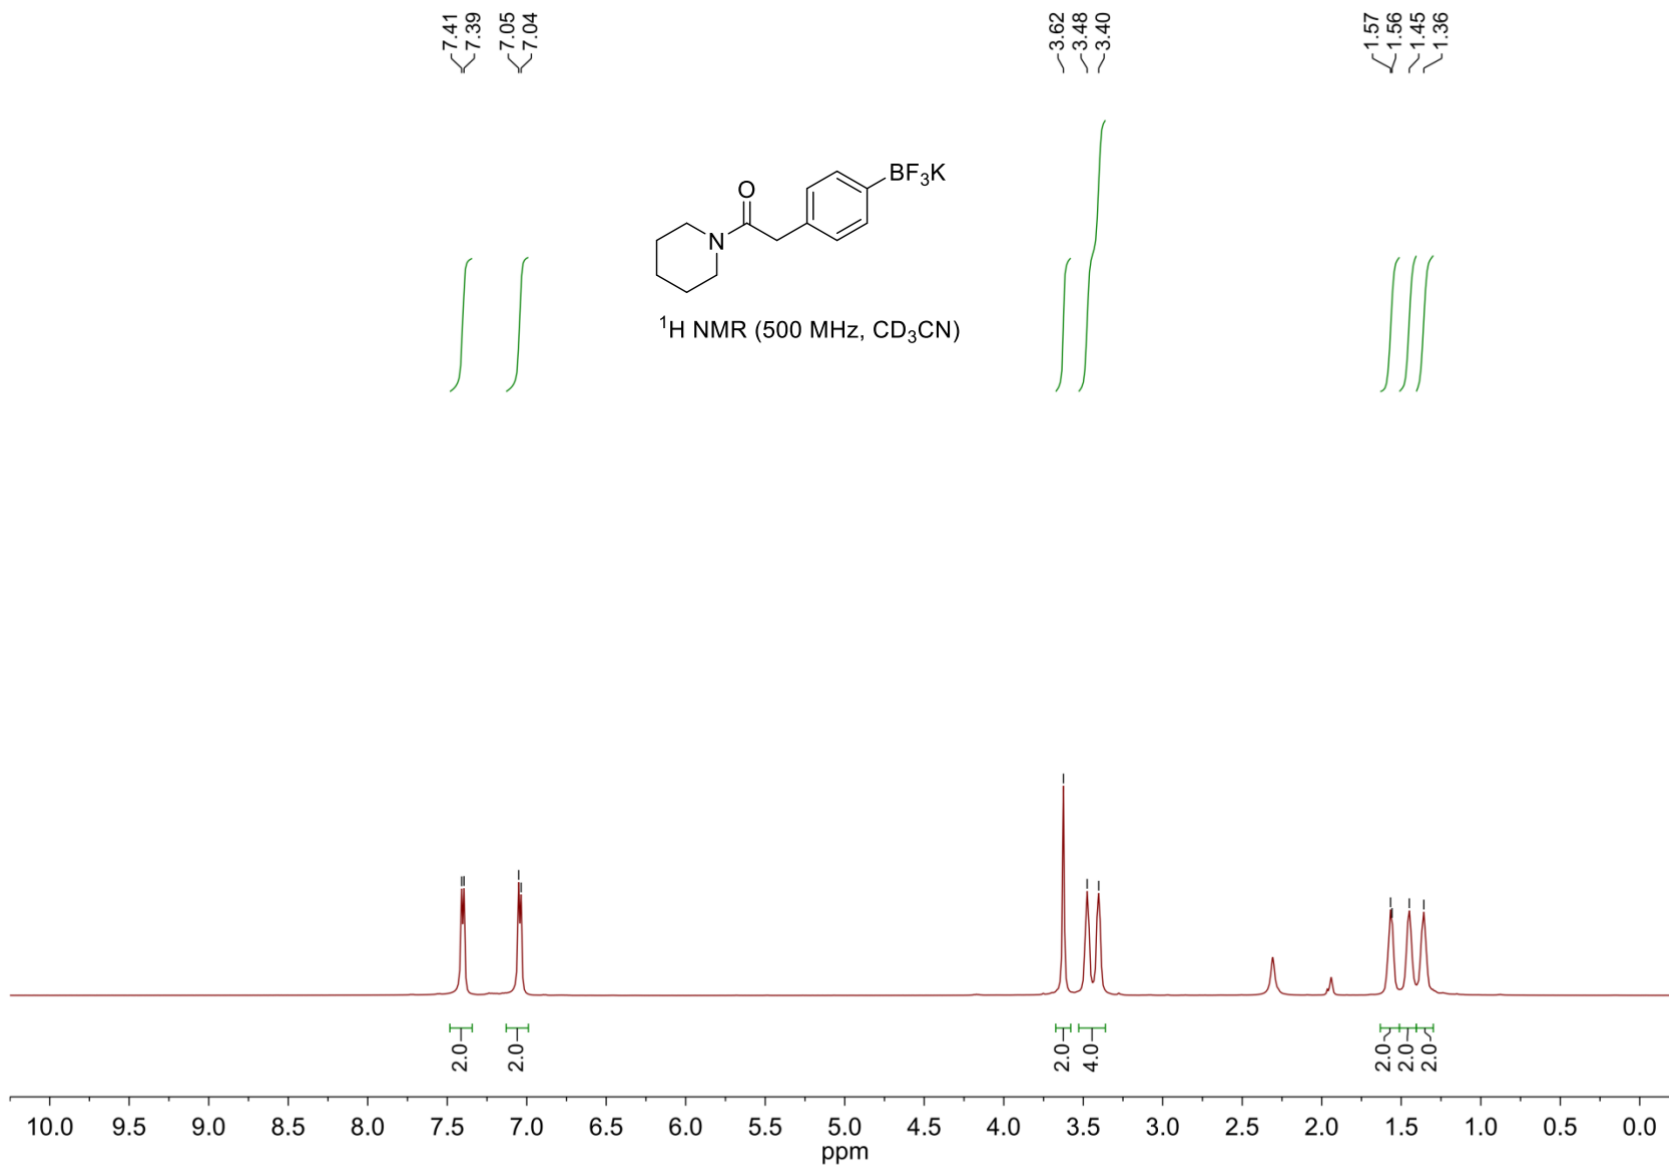

S315

1-(Piperidin-1-yl)-2-(4-(trifluoro- $\lambda^4$ -boraneyl)phenyl)ethan-1-one, potassium salt (21)

—170.6  
—134.0  
—132.5  
—128.0  
—118.3  
—47.7  
—43.2  
—41.2  
—26.9  
—26.3  
—25.0

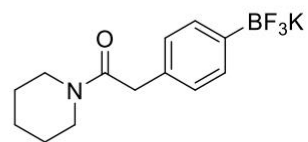

$^{13}\text{C}$  NMR (125 MHz,  $\text{CD}_3\text{CN}$ )

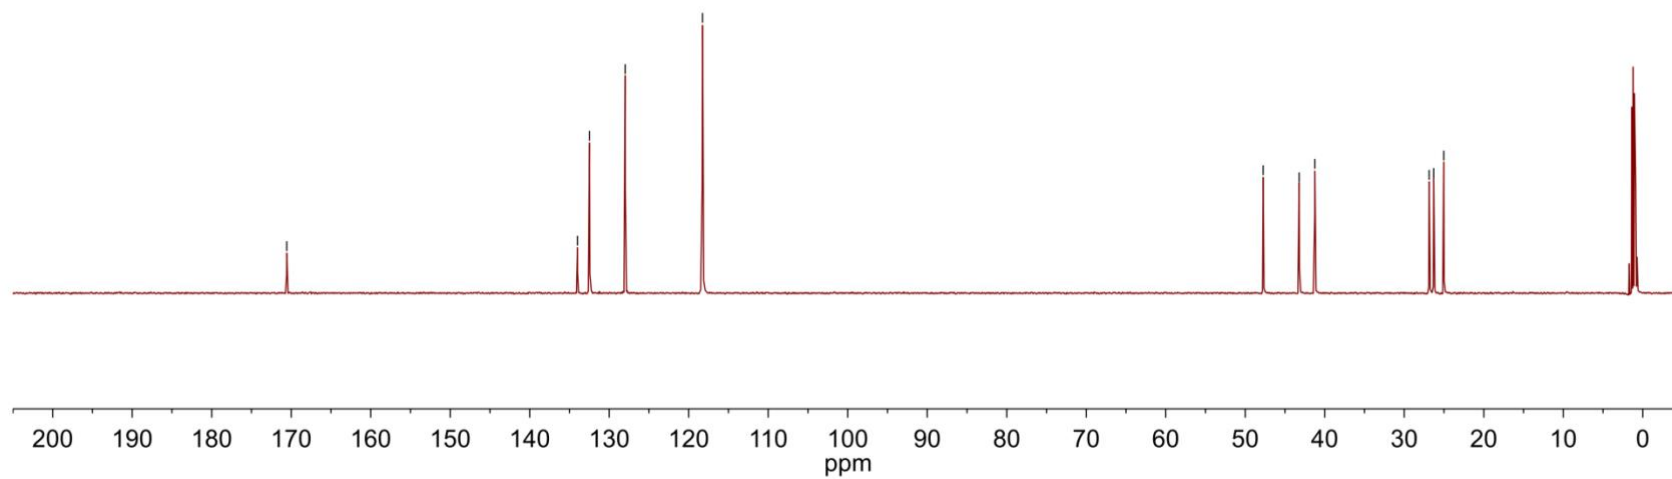

1-(Pyrrolidin-1-yl)-2-(4-(trifluoro- $\lambda^4$ -boraneyl)phenyl)ethan-1-one, potassium salt (22)

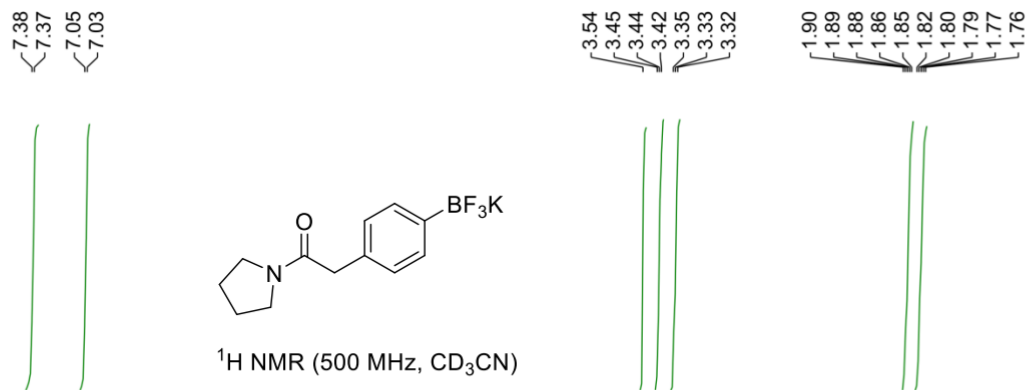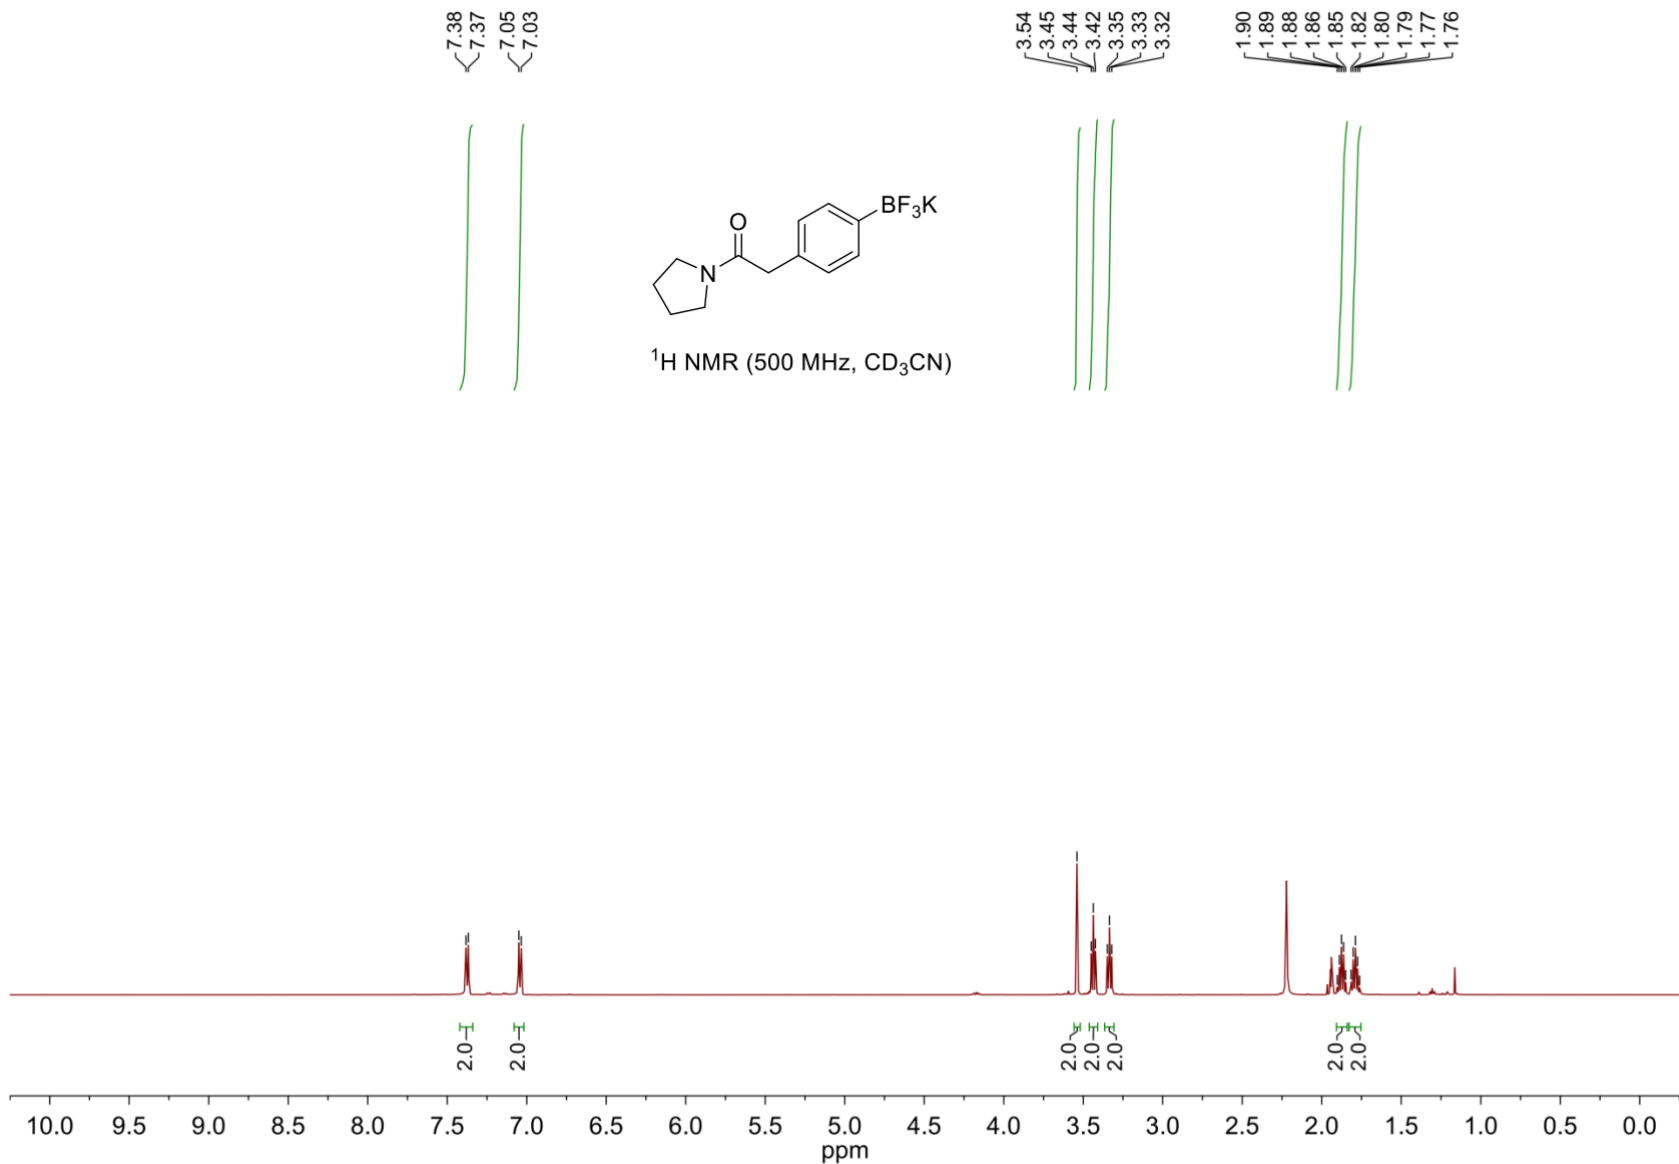

1-(Pyrrolidin-1-yl)-2-(4-(trifluoro- $\lambda^4$ -boraneyl)phenyl)ethan-1-one, potassium salt (22)

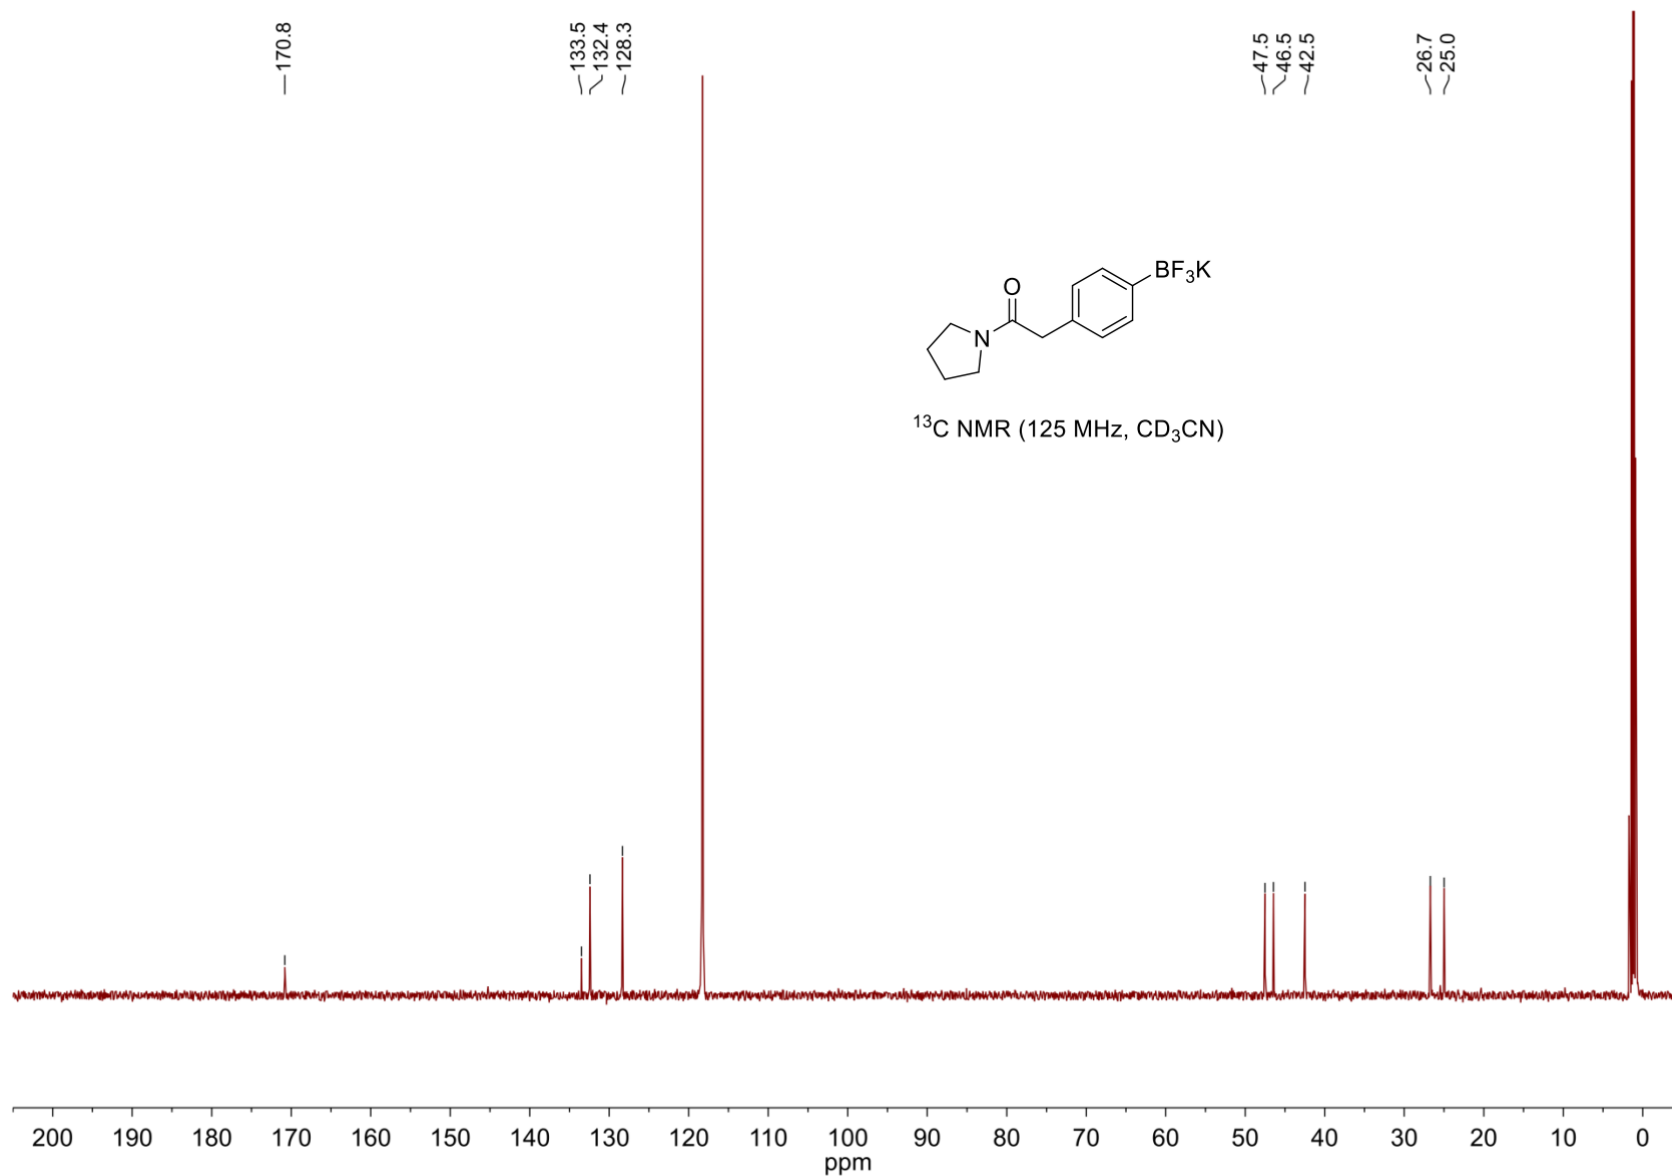

S318

1-(Indolin-1-yl)-2-(4-(4,4,5,5-tetramethyl-1,3,2-dioxaborolan-2-yl)phenyl)ethan-1-one (23)

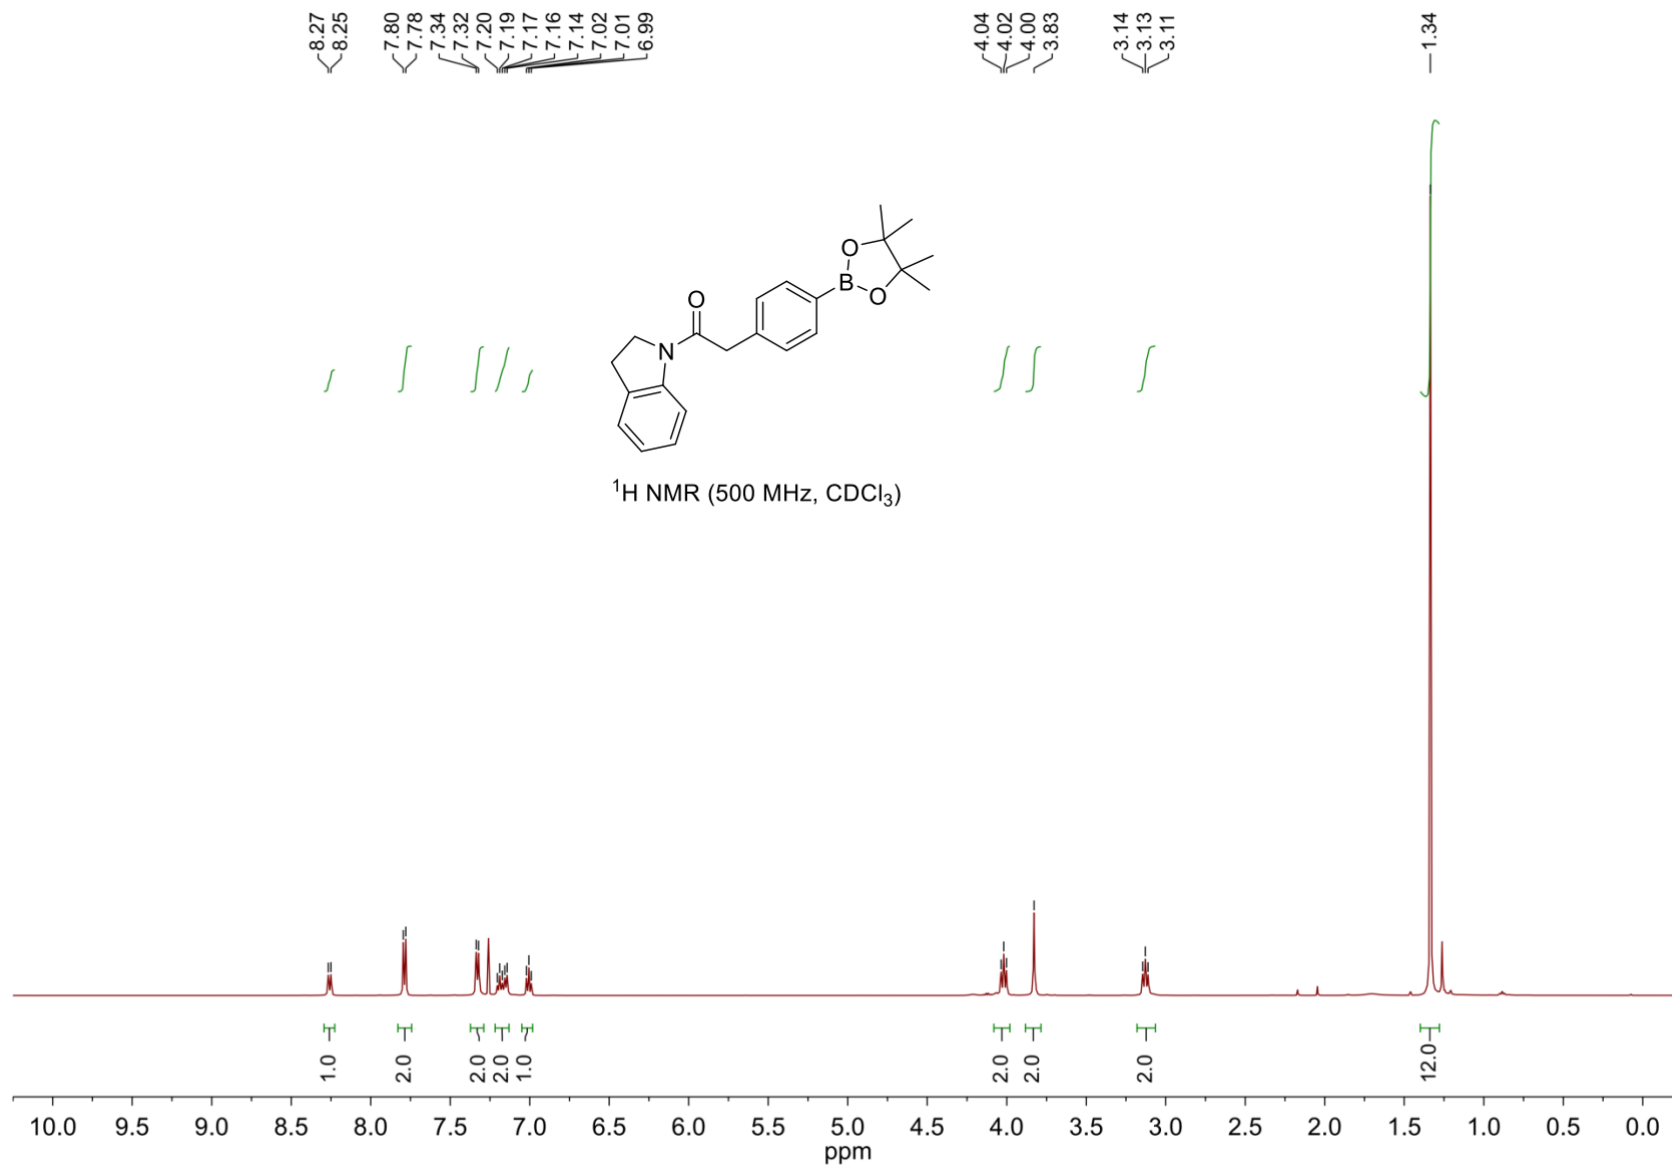

1-(Indolin-1-yl)-2-(4-(4,4,5,5-tetramethyl-1,3,2-dioxaborolan-2-yl)phenyl)ethan-1-one (23)

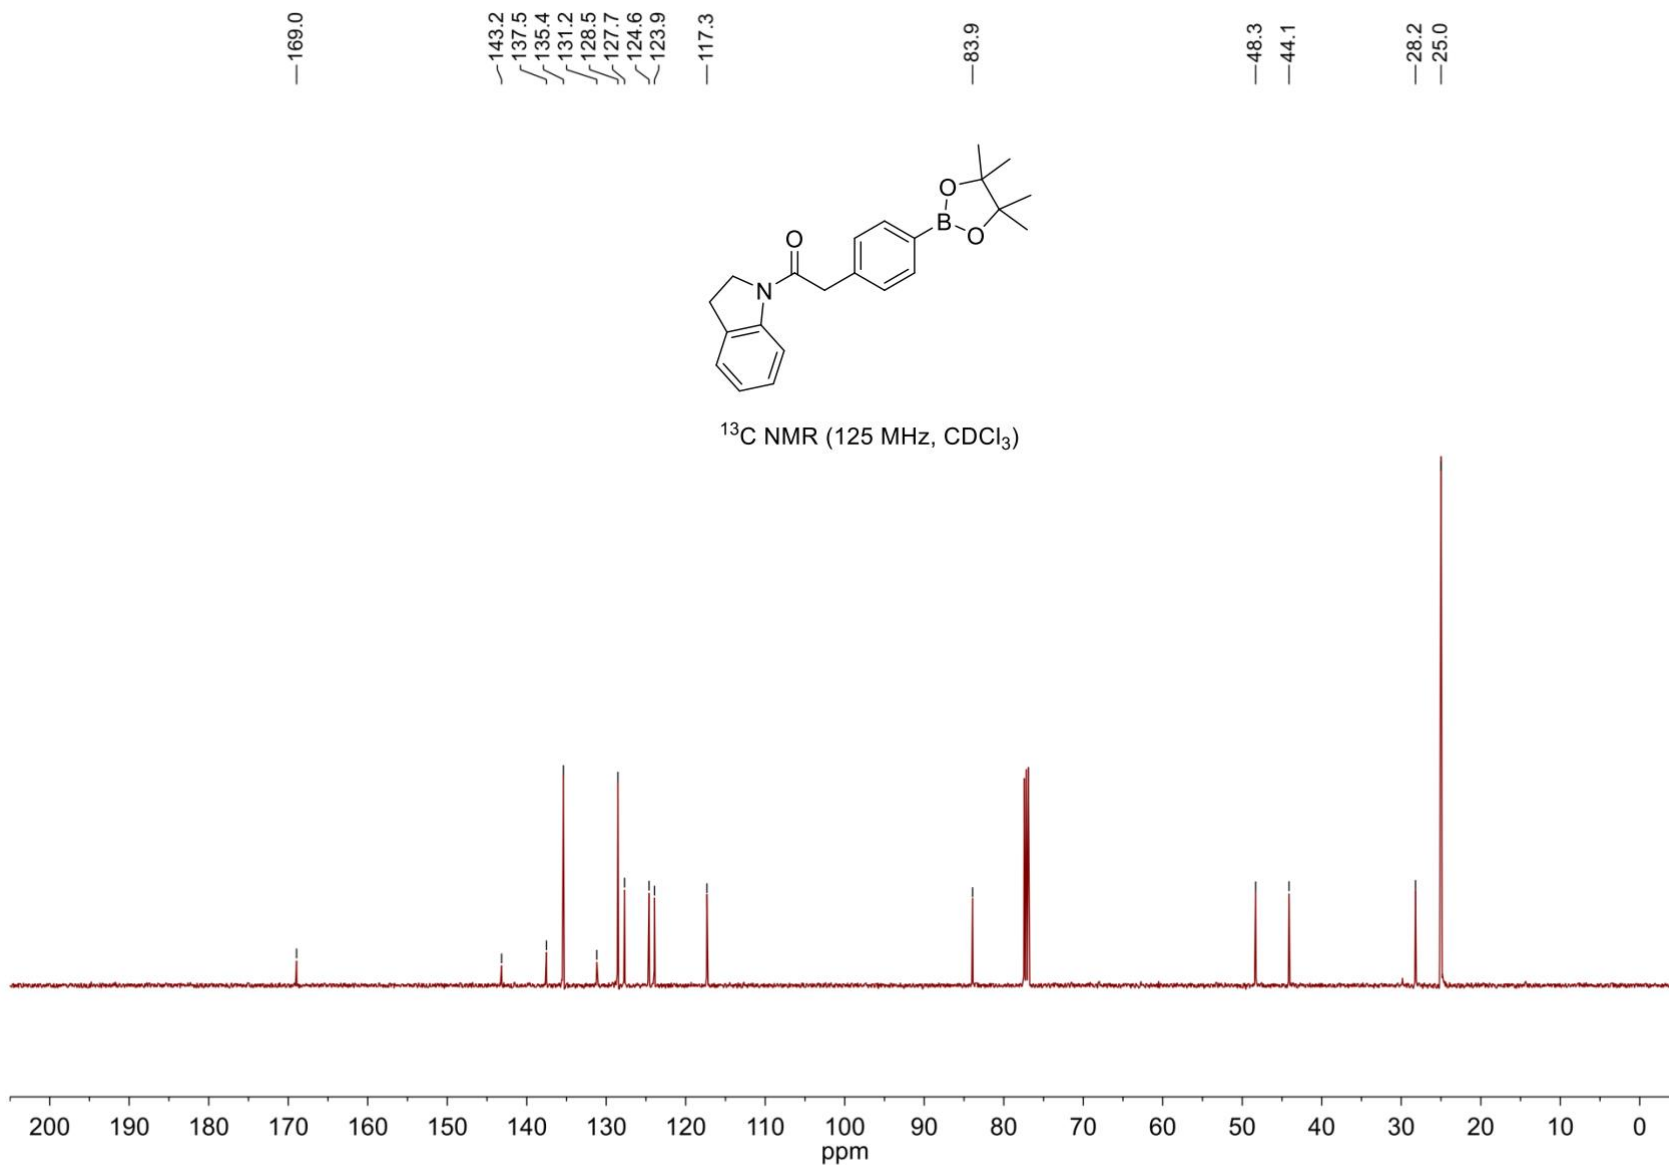

S320



# 1-Morpholino-2-(4-(trifluoro- $\lambda^4$ -boraneyl)phenyl)ethan-1-one, potassium salt (24)

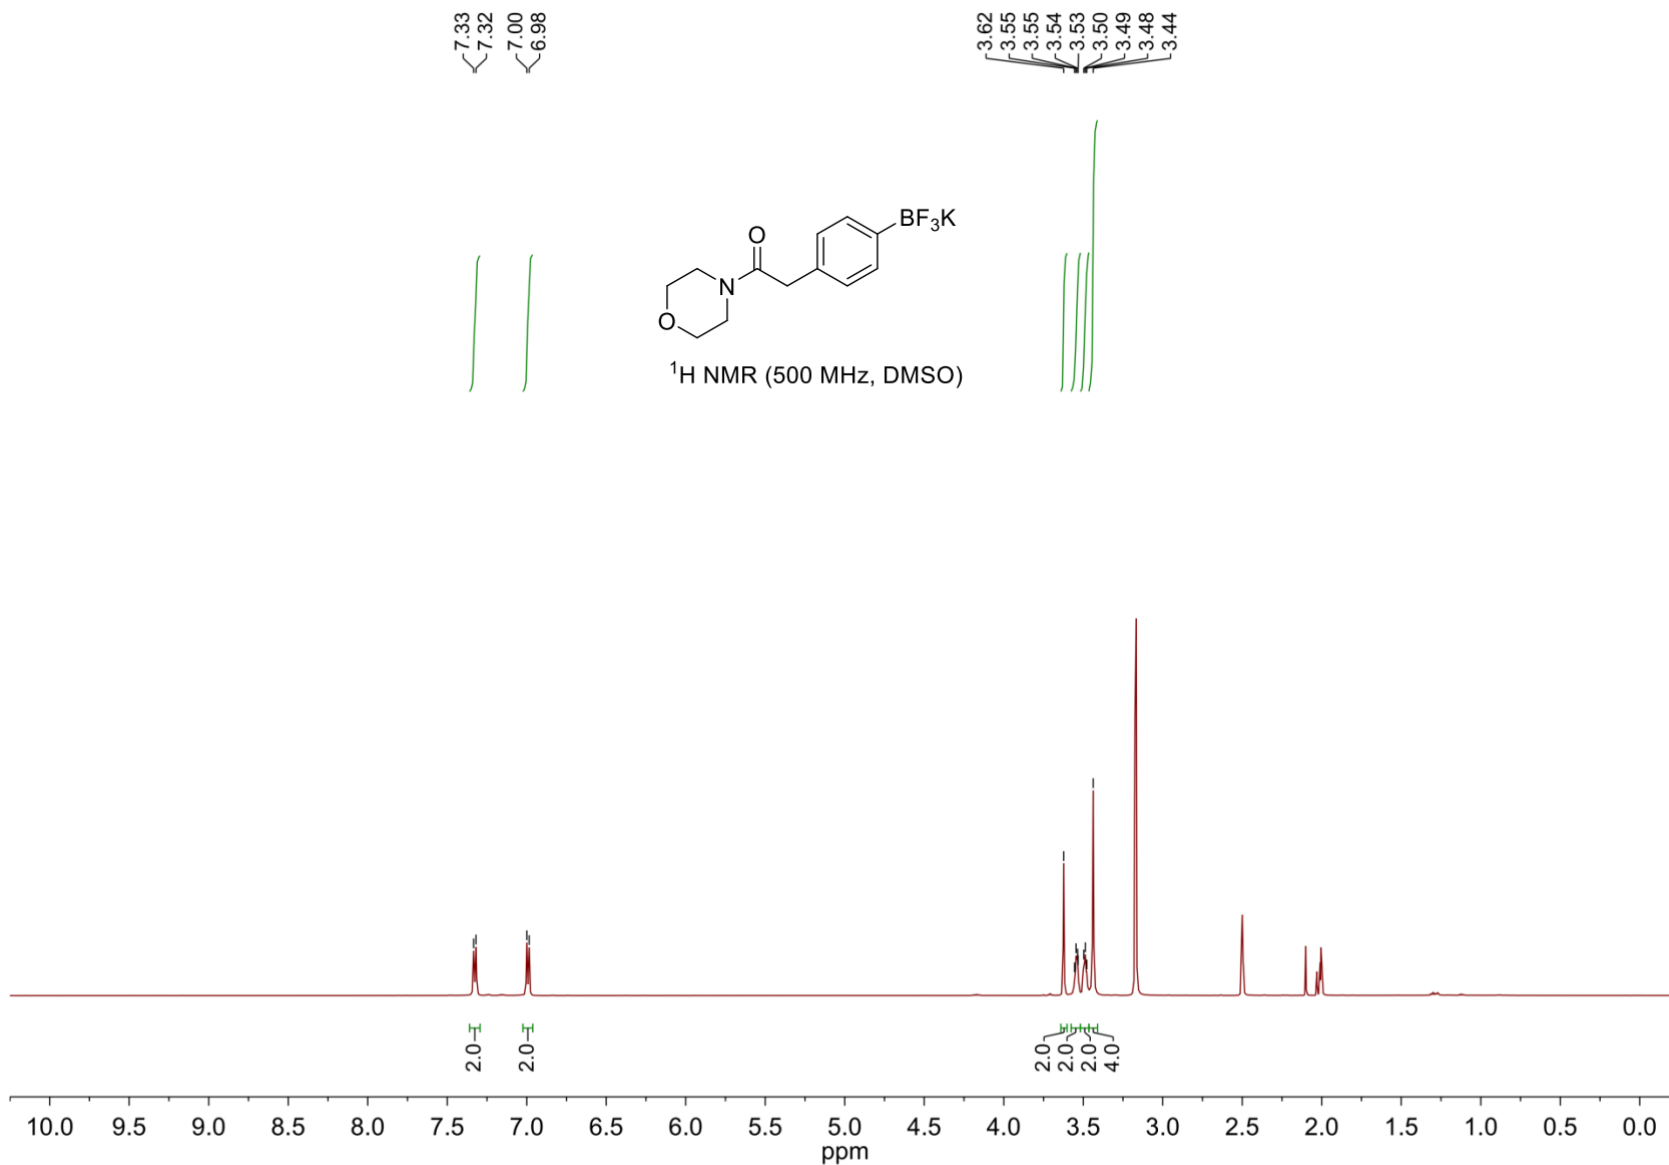

S321

# 1-Morpholino-2-(4-(trifluoro- $\lambda^4$ -boraneyl)phenyl)ethan-1-one, potassium salt (24)

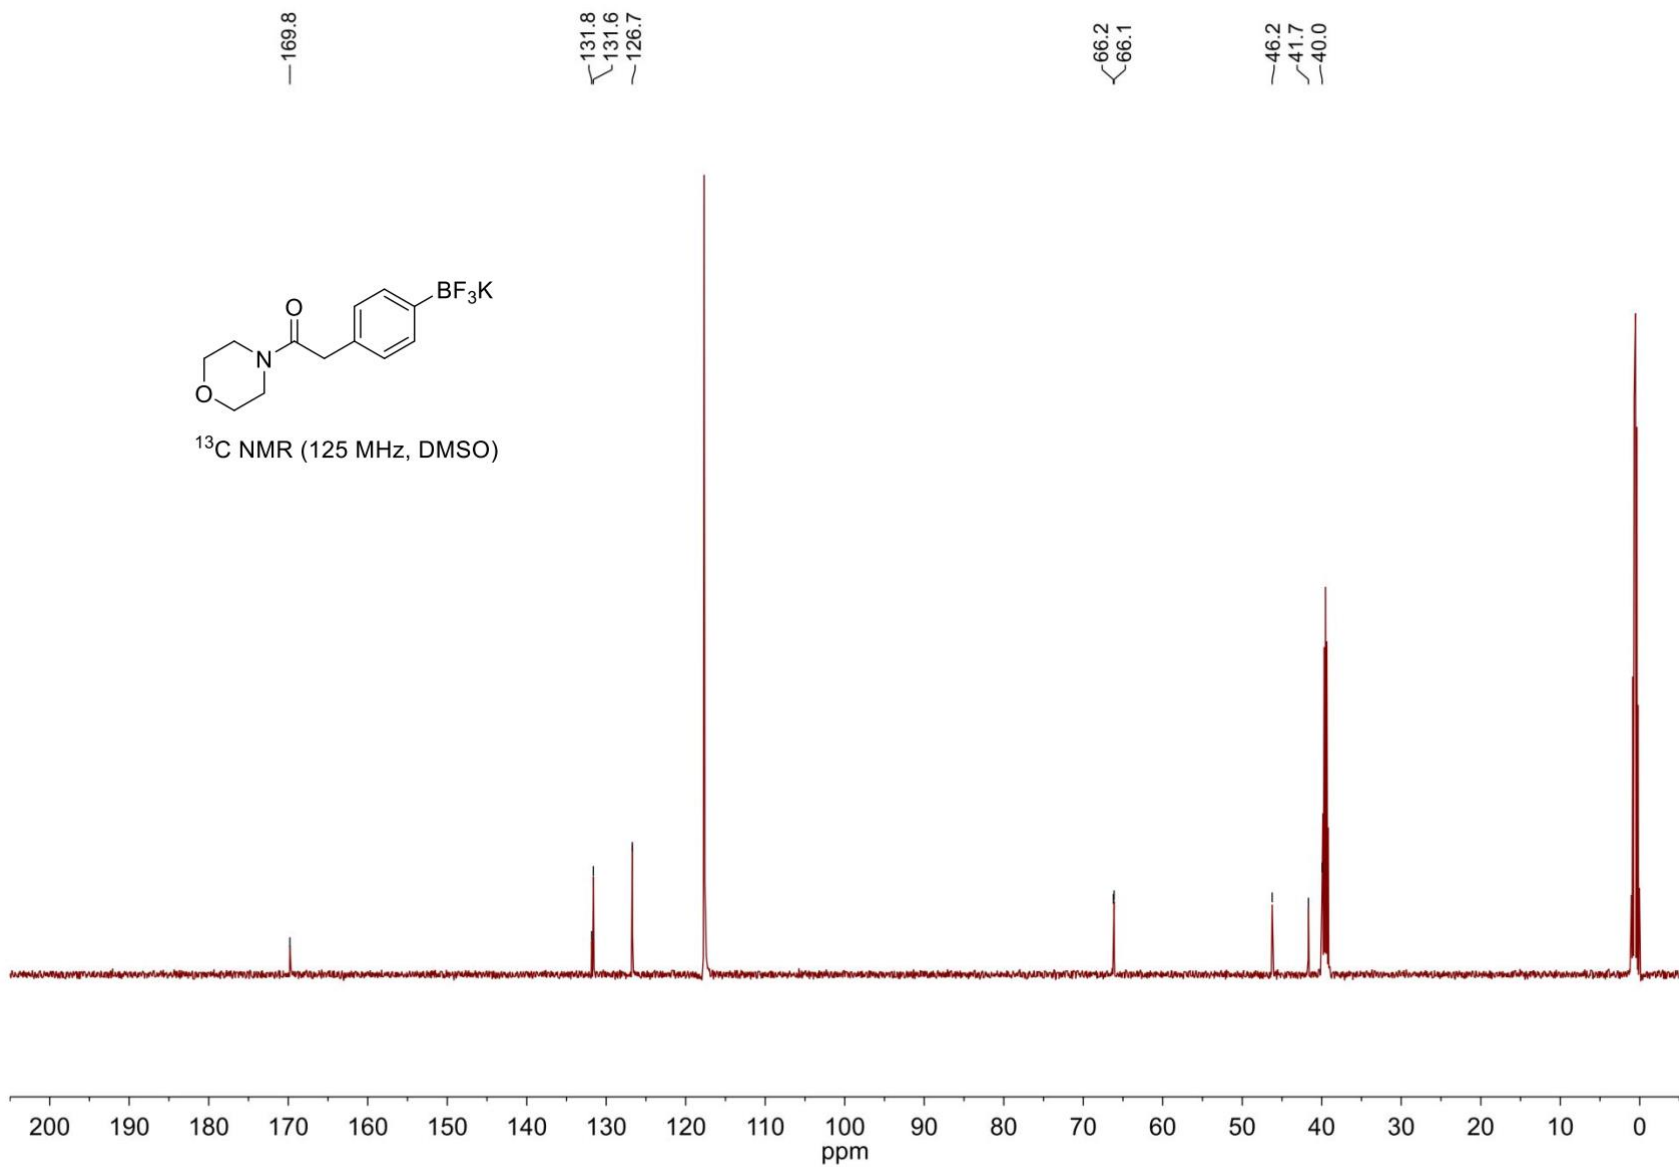

Pyrrolidin-1-yl(4-(trifluoro- $\lambda^4$ -boranoyl)phenyl)methanone, potassium salt (25)

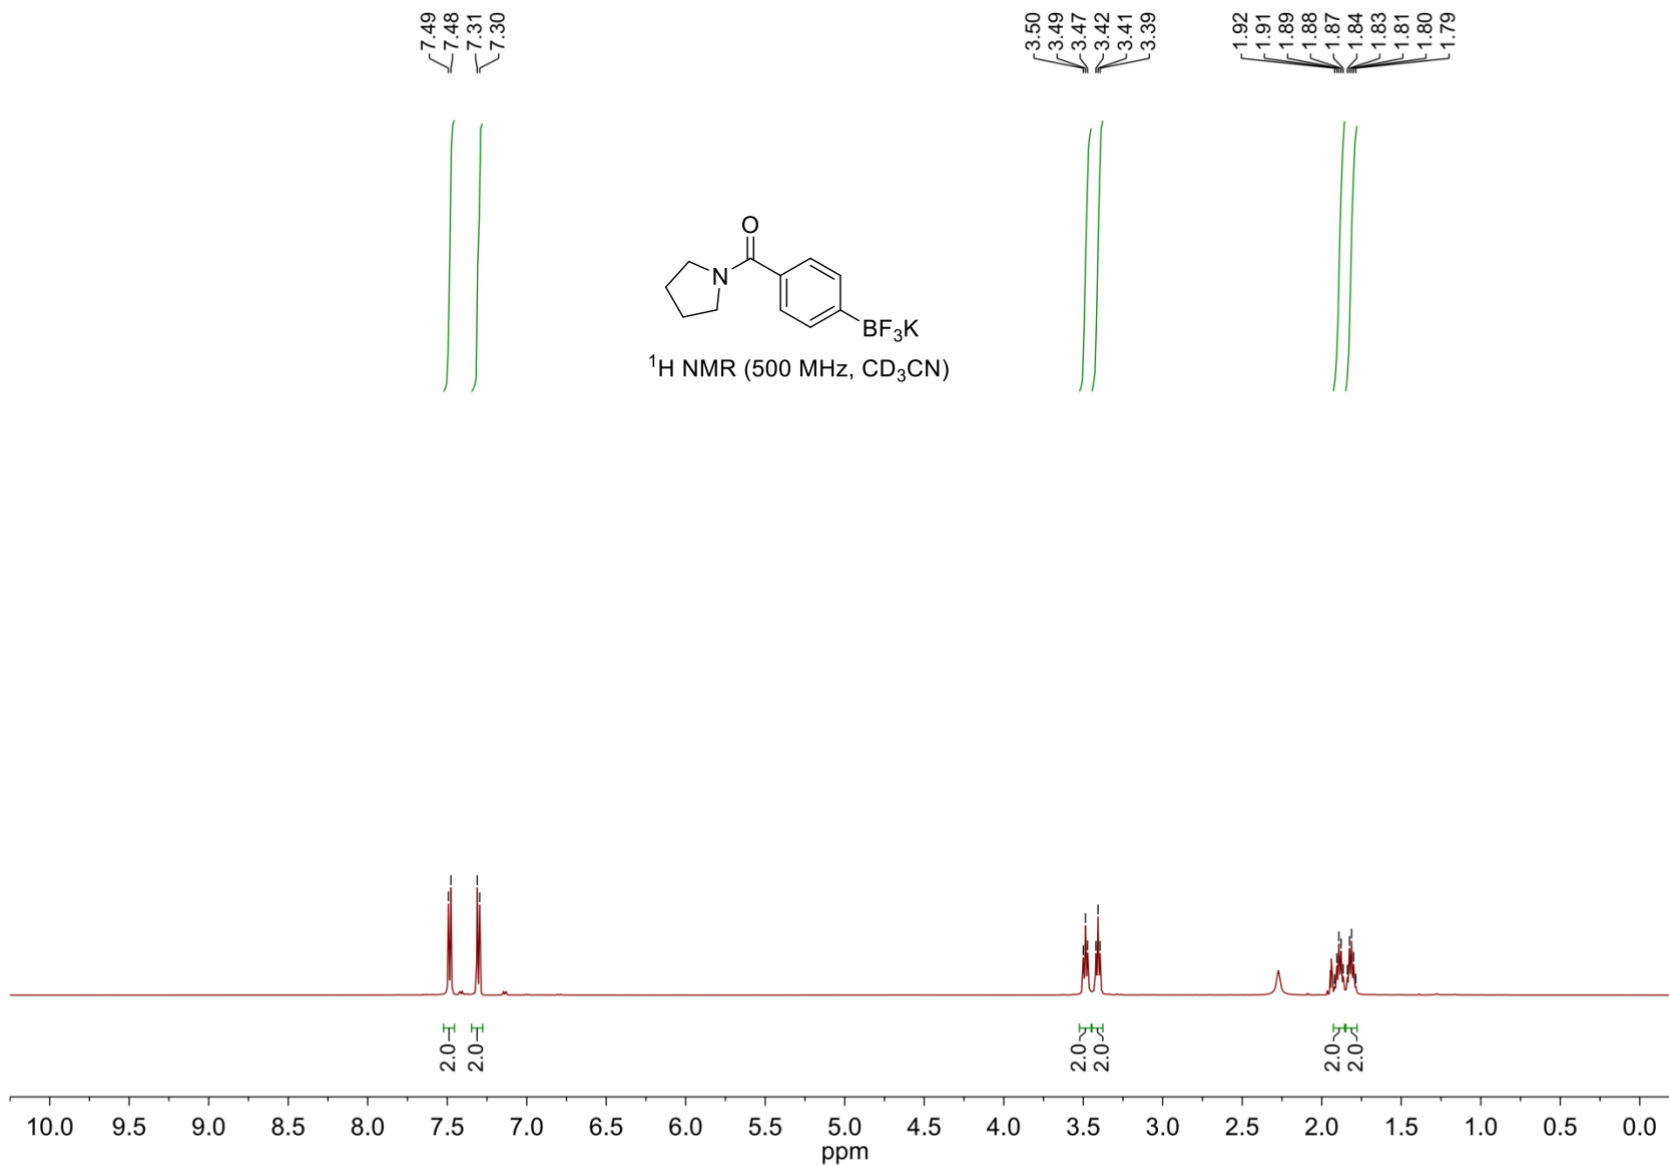

S323

Pyrrolidin-1-yl(4-(trifluoro- $\lambda^4$ -boraneyl)phenyl)methanone, potassium salt (25)

—171.1

—135.7

—131.9

—126.3

—50.2

—46.8

—27.0

—25.0

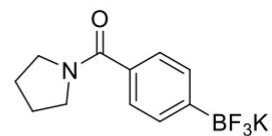

$^{13}\text{C}$  NMR (125 MHz,  $\text{CD}_3\text{CN}$ )

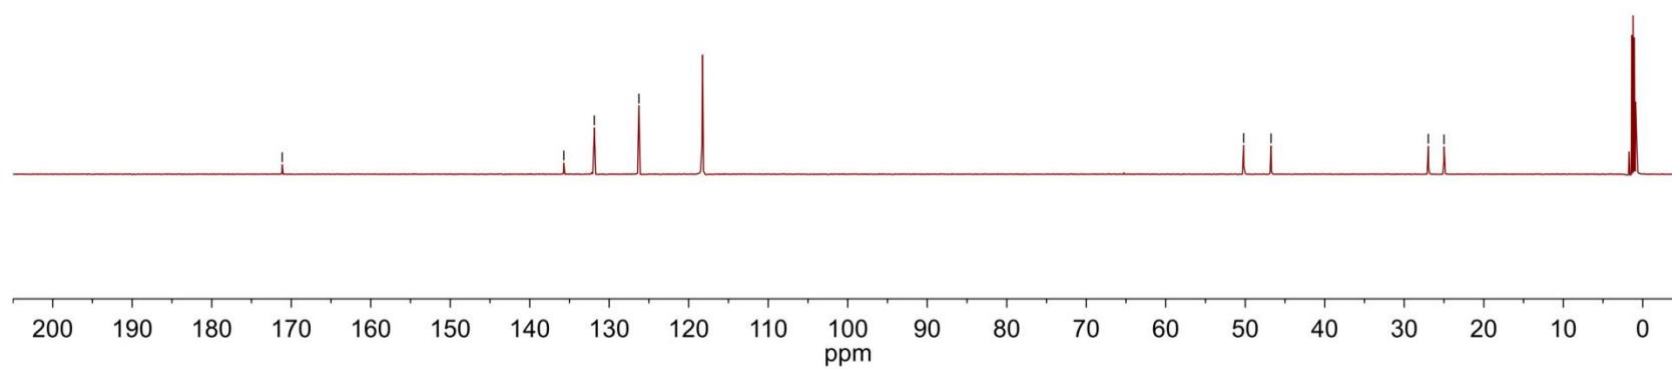

S324

*tert*-Butyl 4-(4-(trifluoro-*l*4-boraneyl)benzamido)piperidine-1-carboxylate, potassium salt (26)

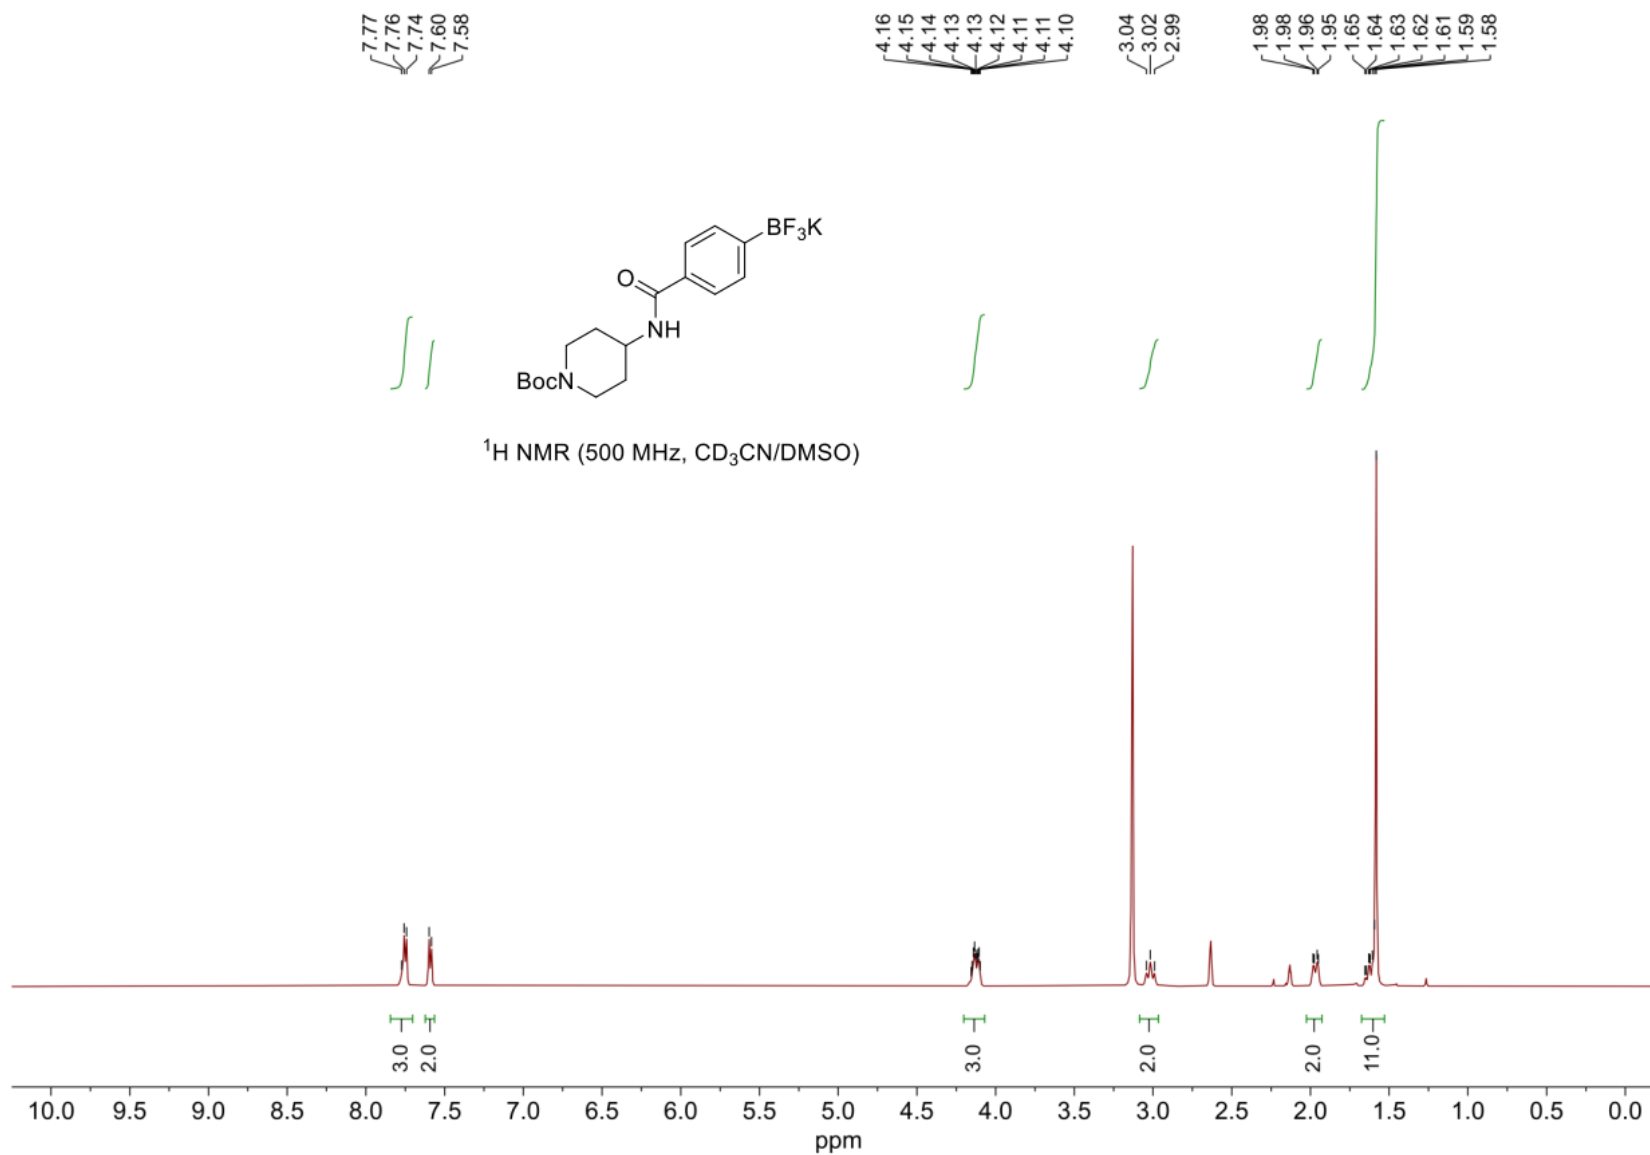

*tert*-Butyl 4-(4-(trifluoro-*l*-boraneyl)benzamido)piperidine-1-carboxylate, potassium salt (26)

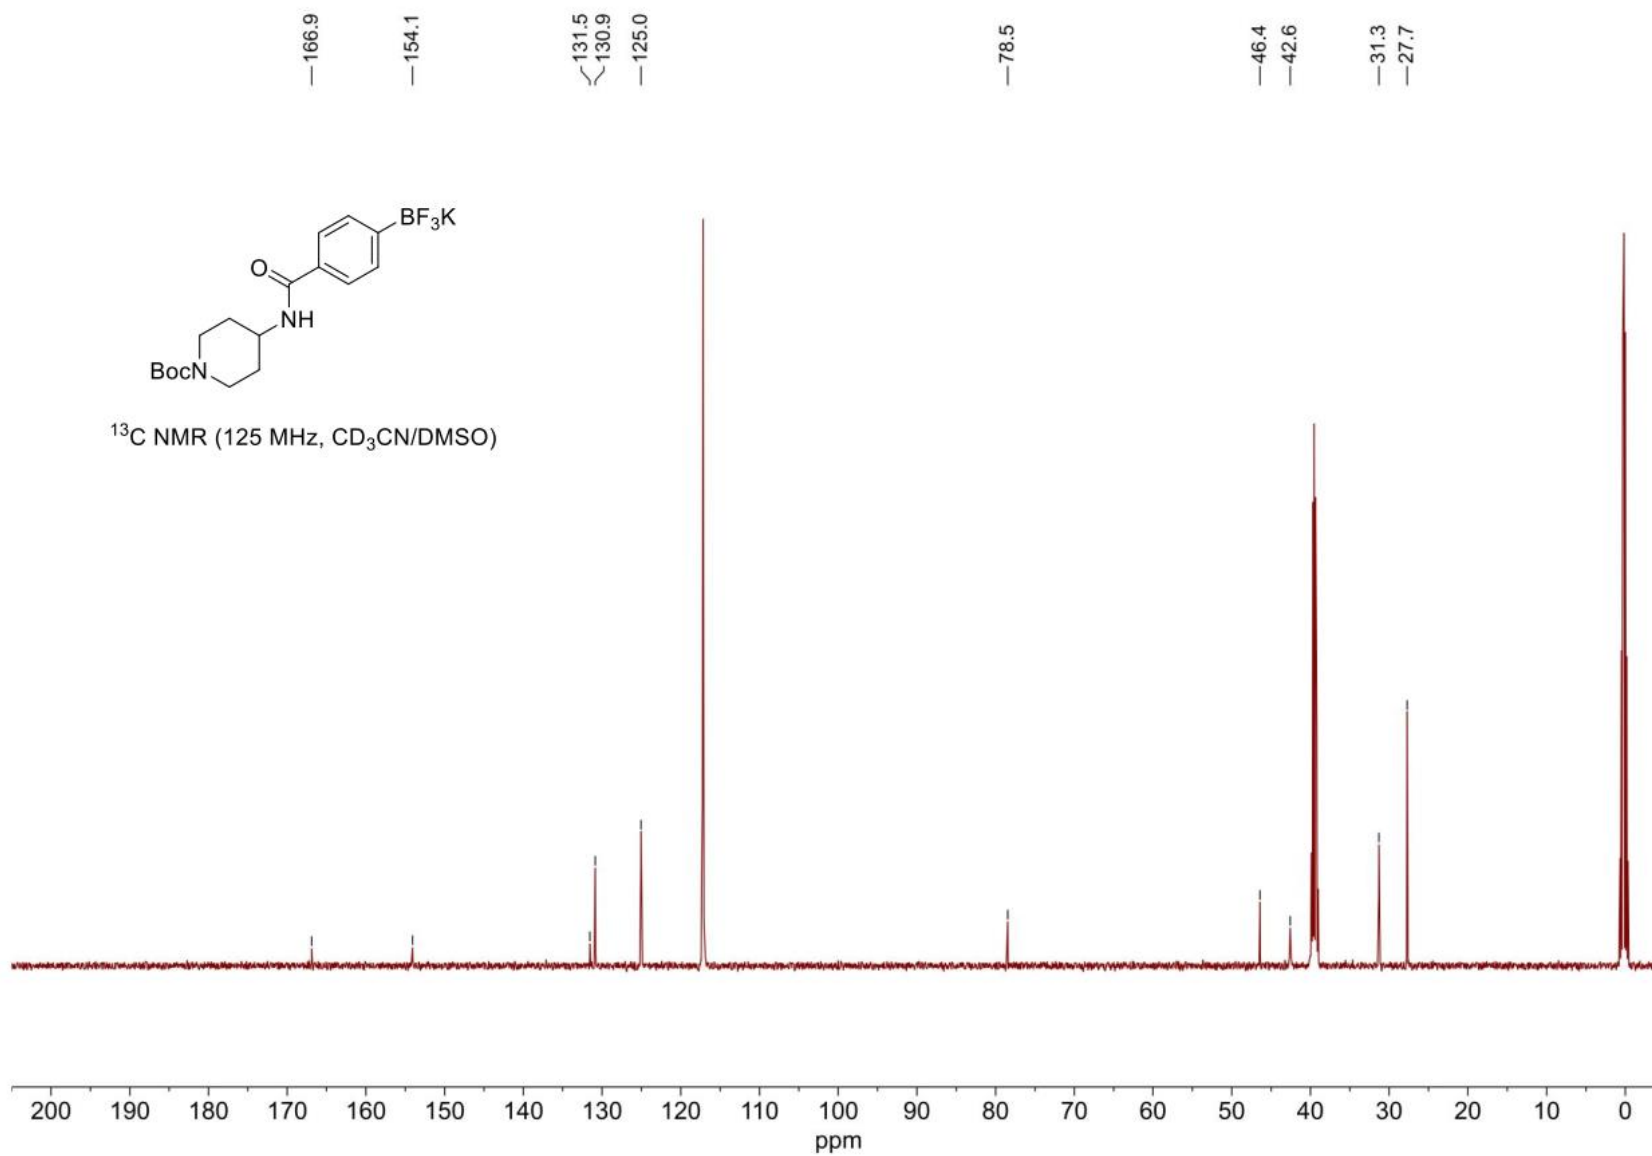

*tert*-Butyl 5-(4,4,5,5-tetramethyl-1,3,2-dioxaborolan-2-yl)-3,4-dihydroquinoline-1(2*H*)-carboxylate (27)

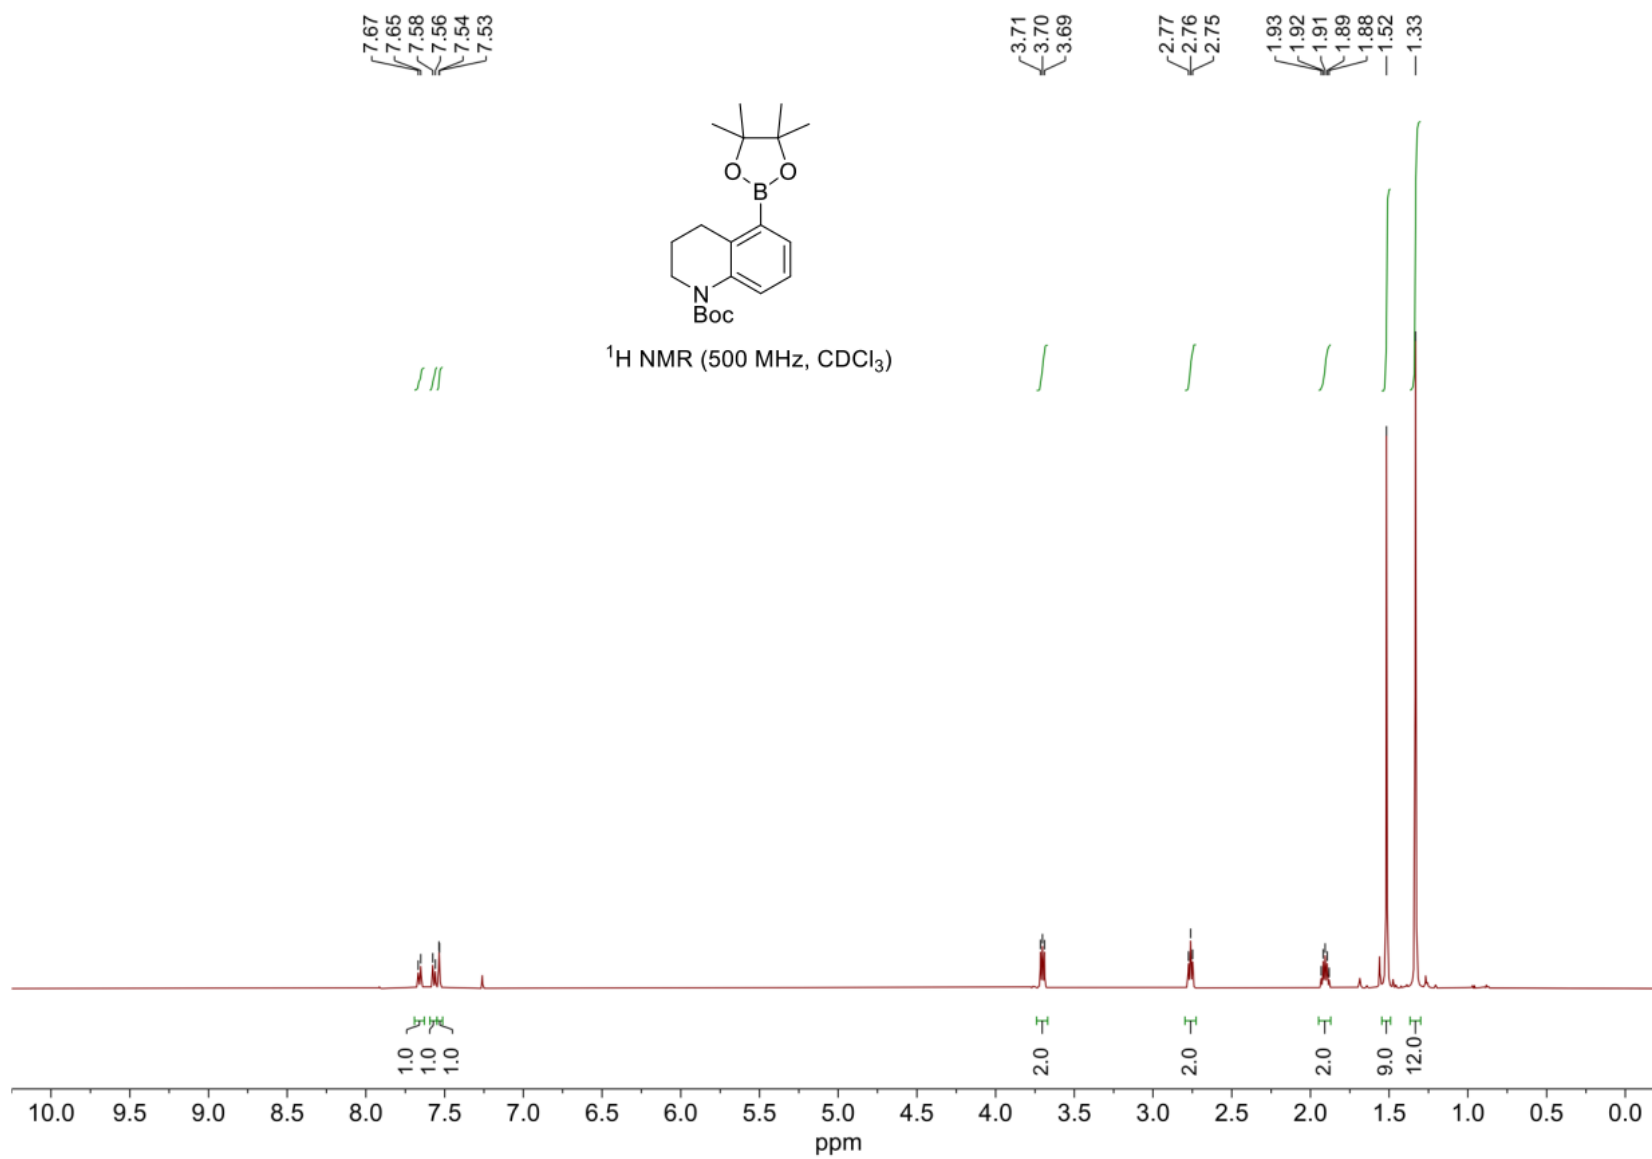

S327

*tert*-Butyl 5-(4,4,5,5-tetramethyl-1,3,2-dioxaborolan-2-yl)-3,4-dihydroquinoline-1(2*H*)-carboxylate (27)

—153.9      —141.6      —135.4      —132.4      —129.1      —123.3      —83.7      —81.1      —45.0      —28.5      —27.6      —25.0      —23.6

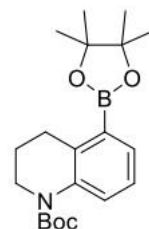

<sup>13</sup>C NMR (125 MHz, CDCl<sub>3</sub>)

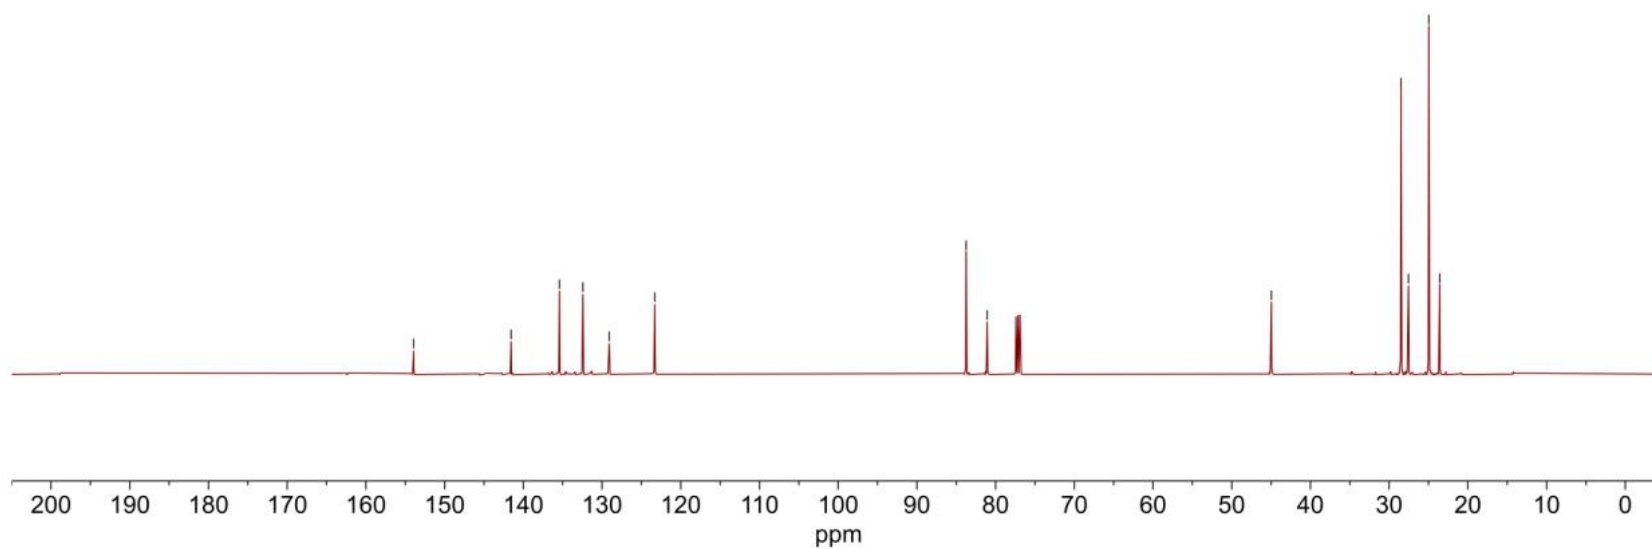



*tert*-Butyl 4-(4,4,5,5-tetramethyl-1,3,2-dioxaborolan-2-yl)indoline-1-carboxylate (28)

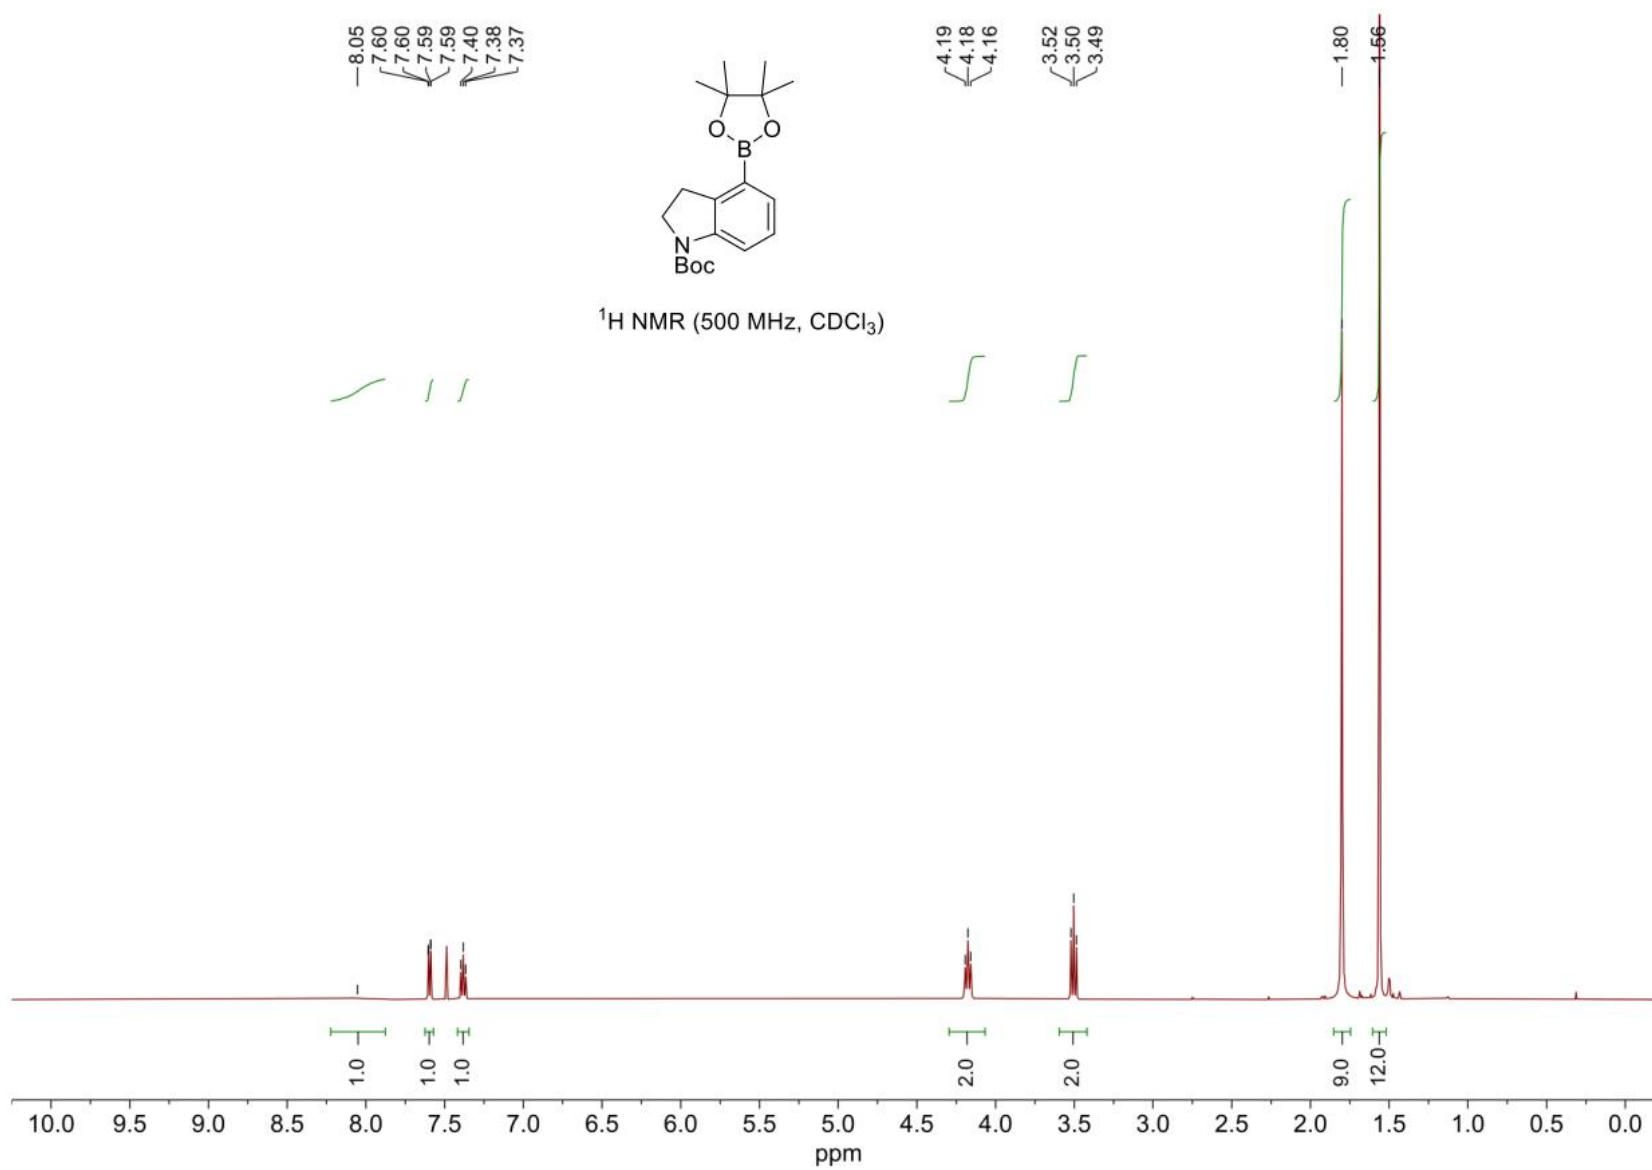

*tert*-Butyl 4-(4,4,5,5-tetramethyl-1,3,2-dioxaborolan-2-yl)indoline-1-carboxylate (28)

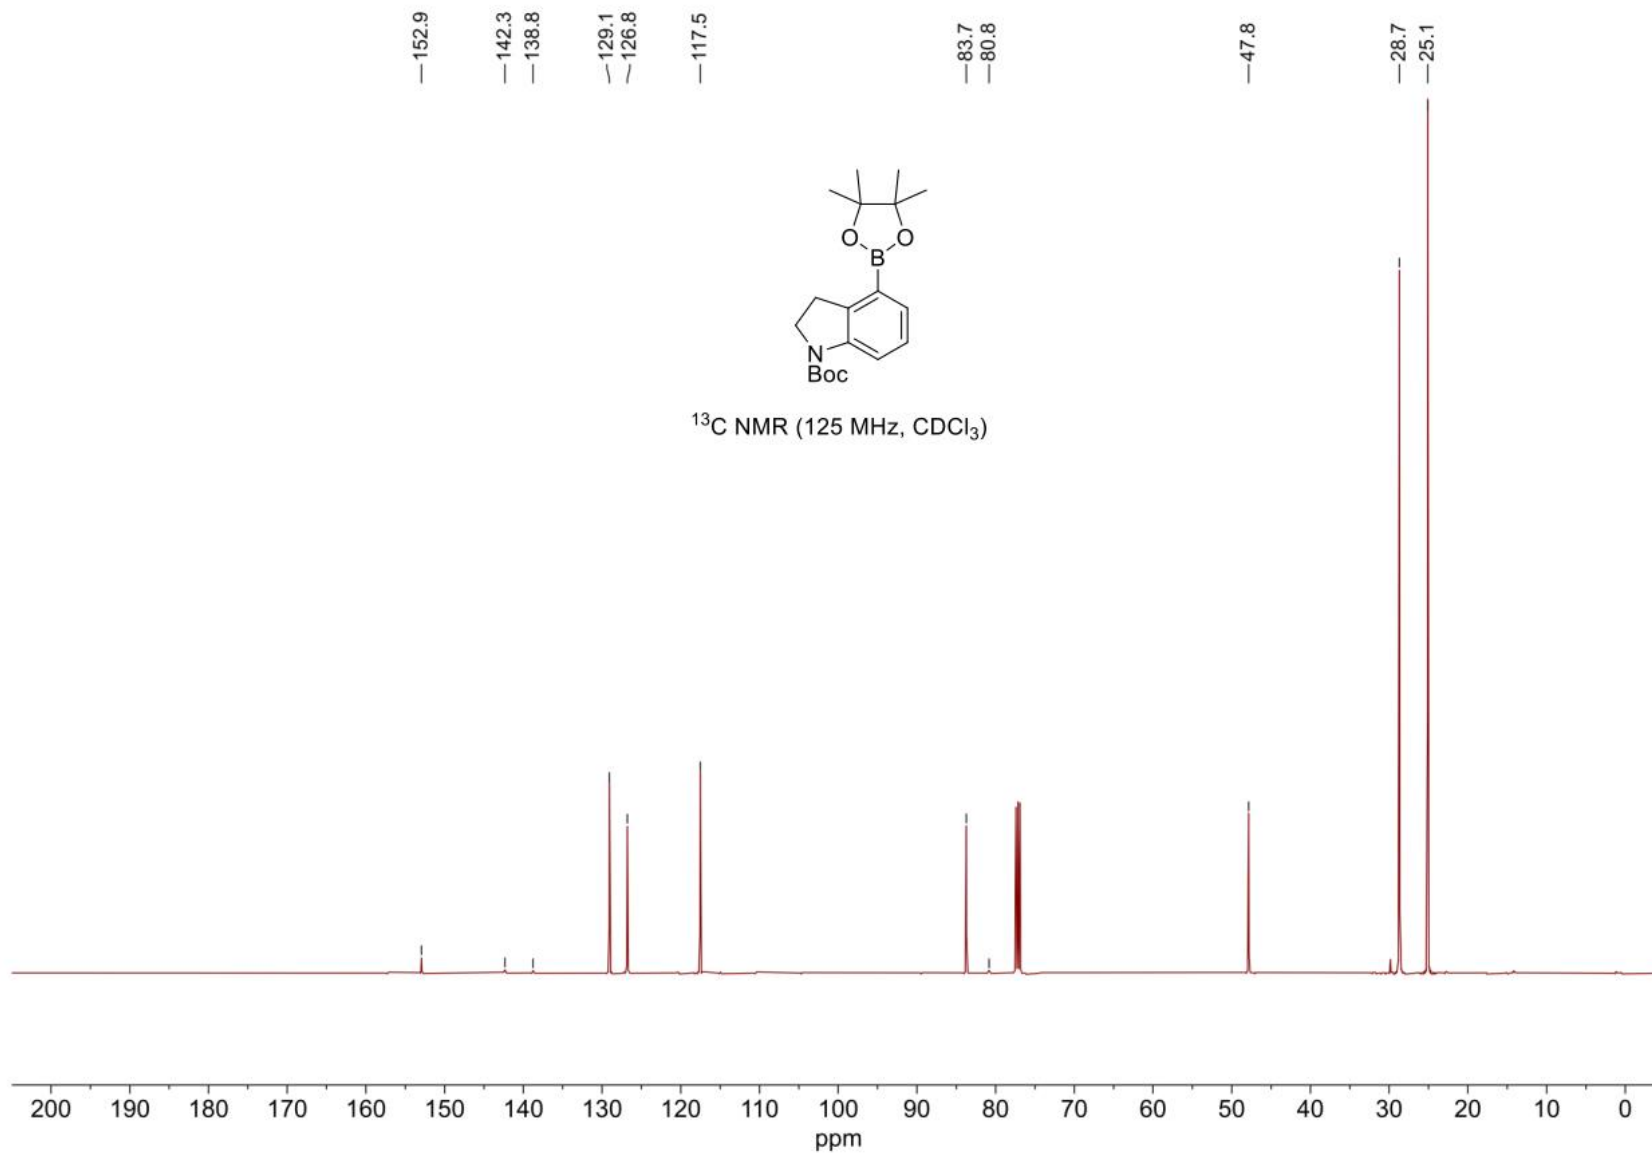

S330

2-([1,1'-Biphenyl]-4-yl)-4,4,5,5-tetramethyl-1,3,2-dioxaborolane (29)

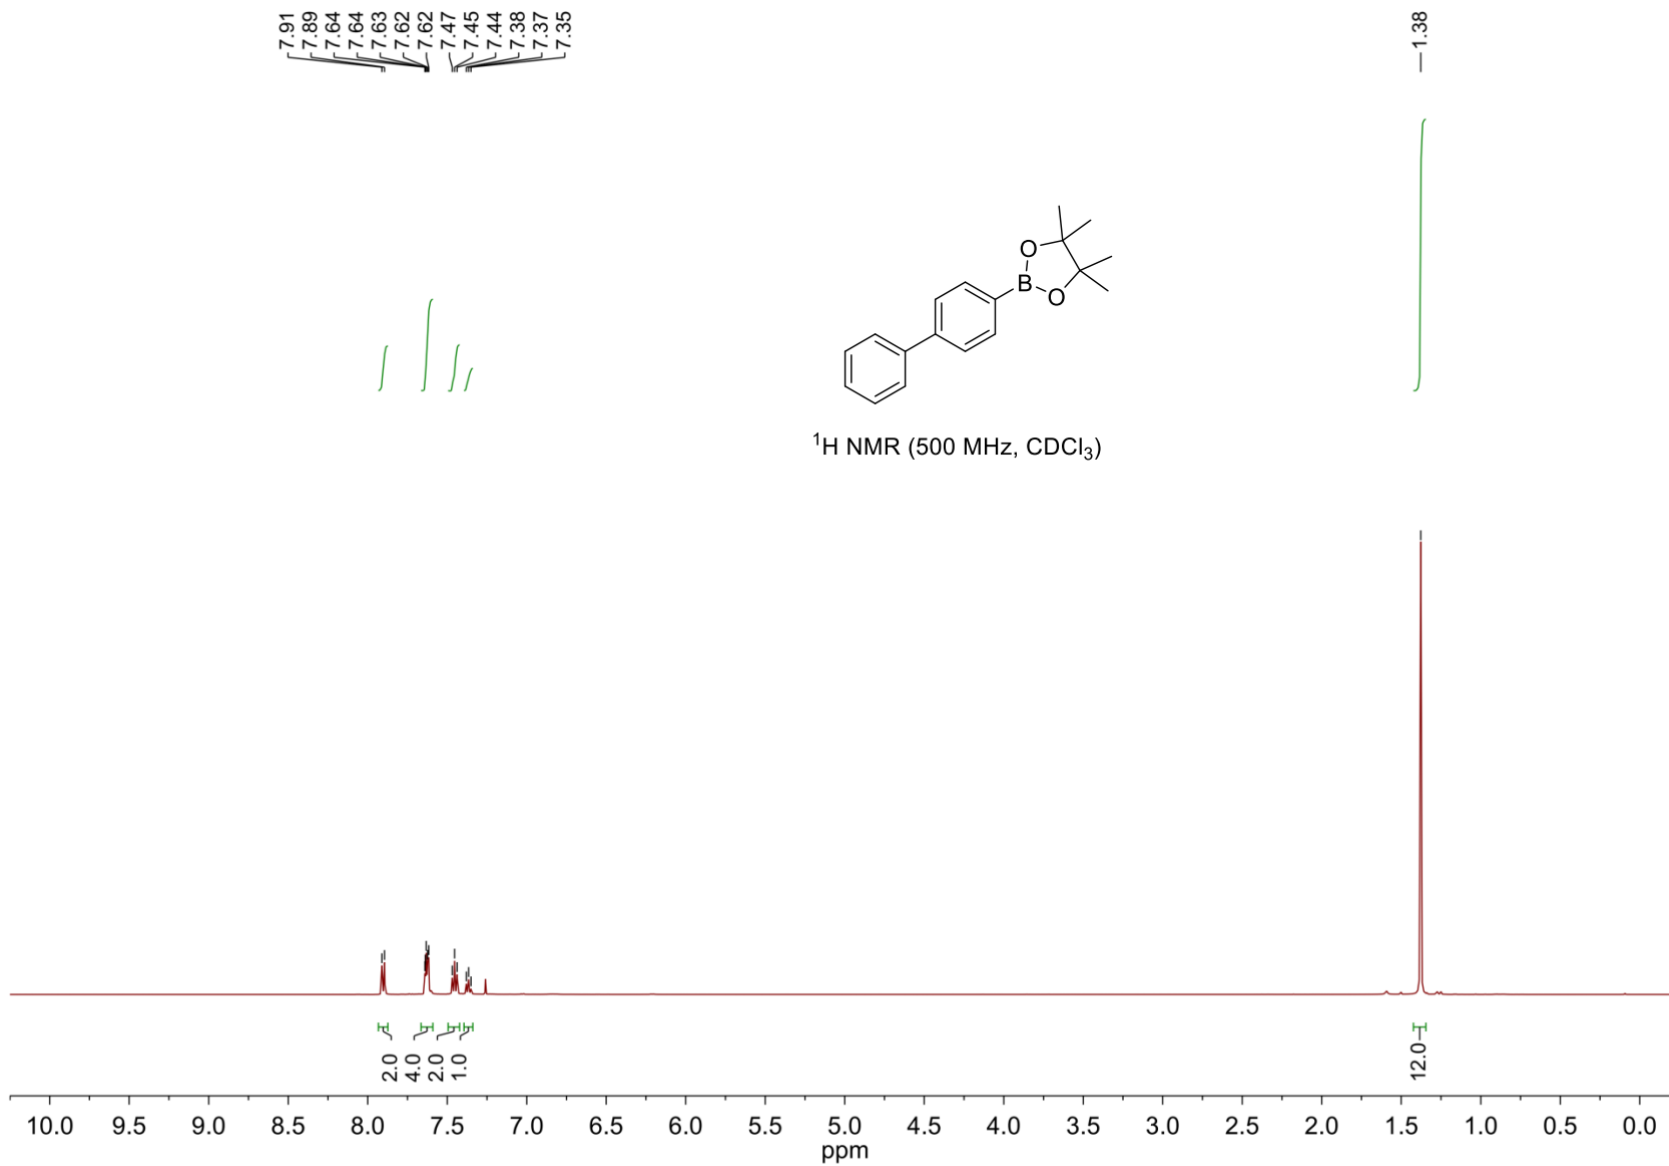

2-([1,1'-Biphenyl]-4-yl)-4,4,5,5-tetramethyl-1,3,2-dioxaborolane (29)

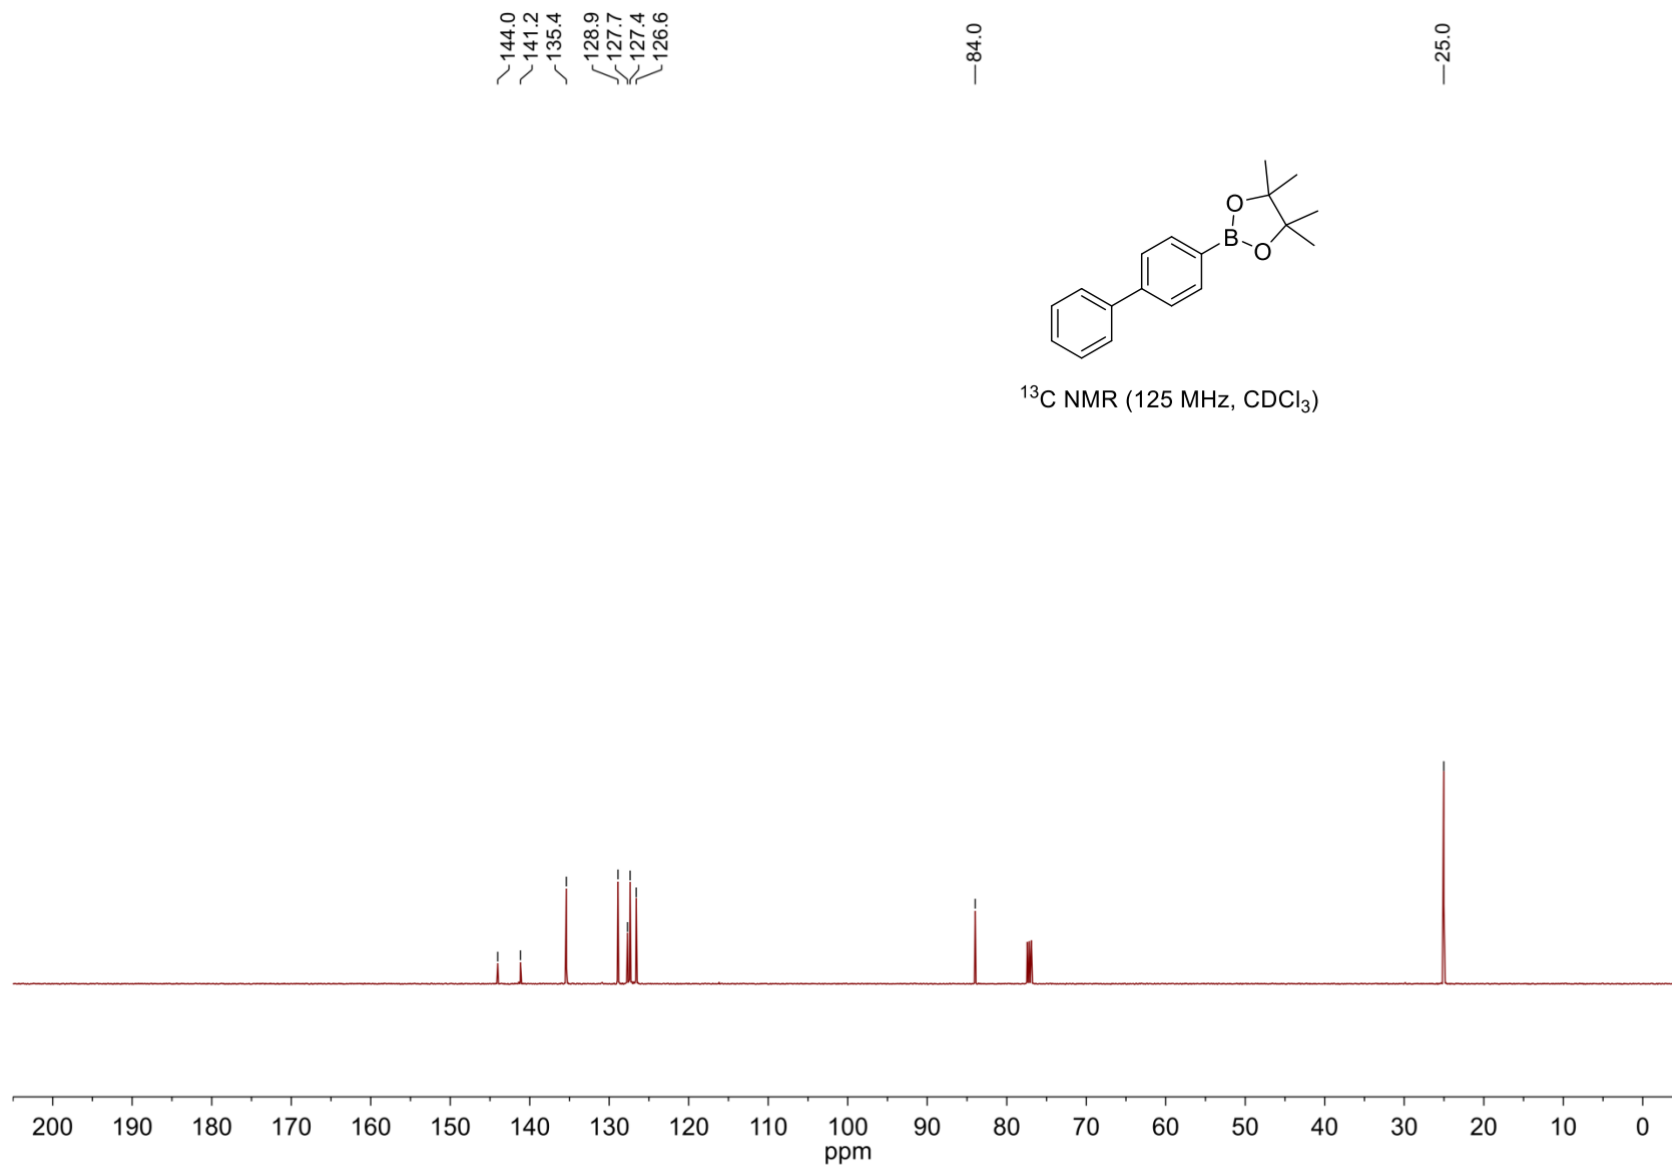

# 4,4,5,5-Tetramethyl-2-(naphthalen-1-yl)-1,3,2-dioxaborolane (30)

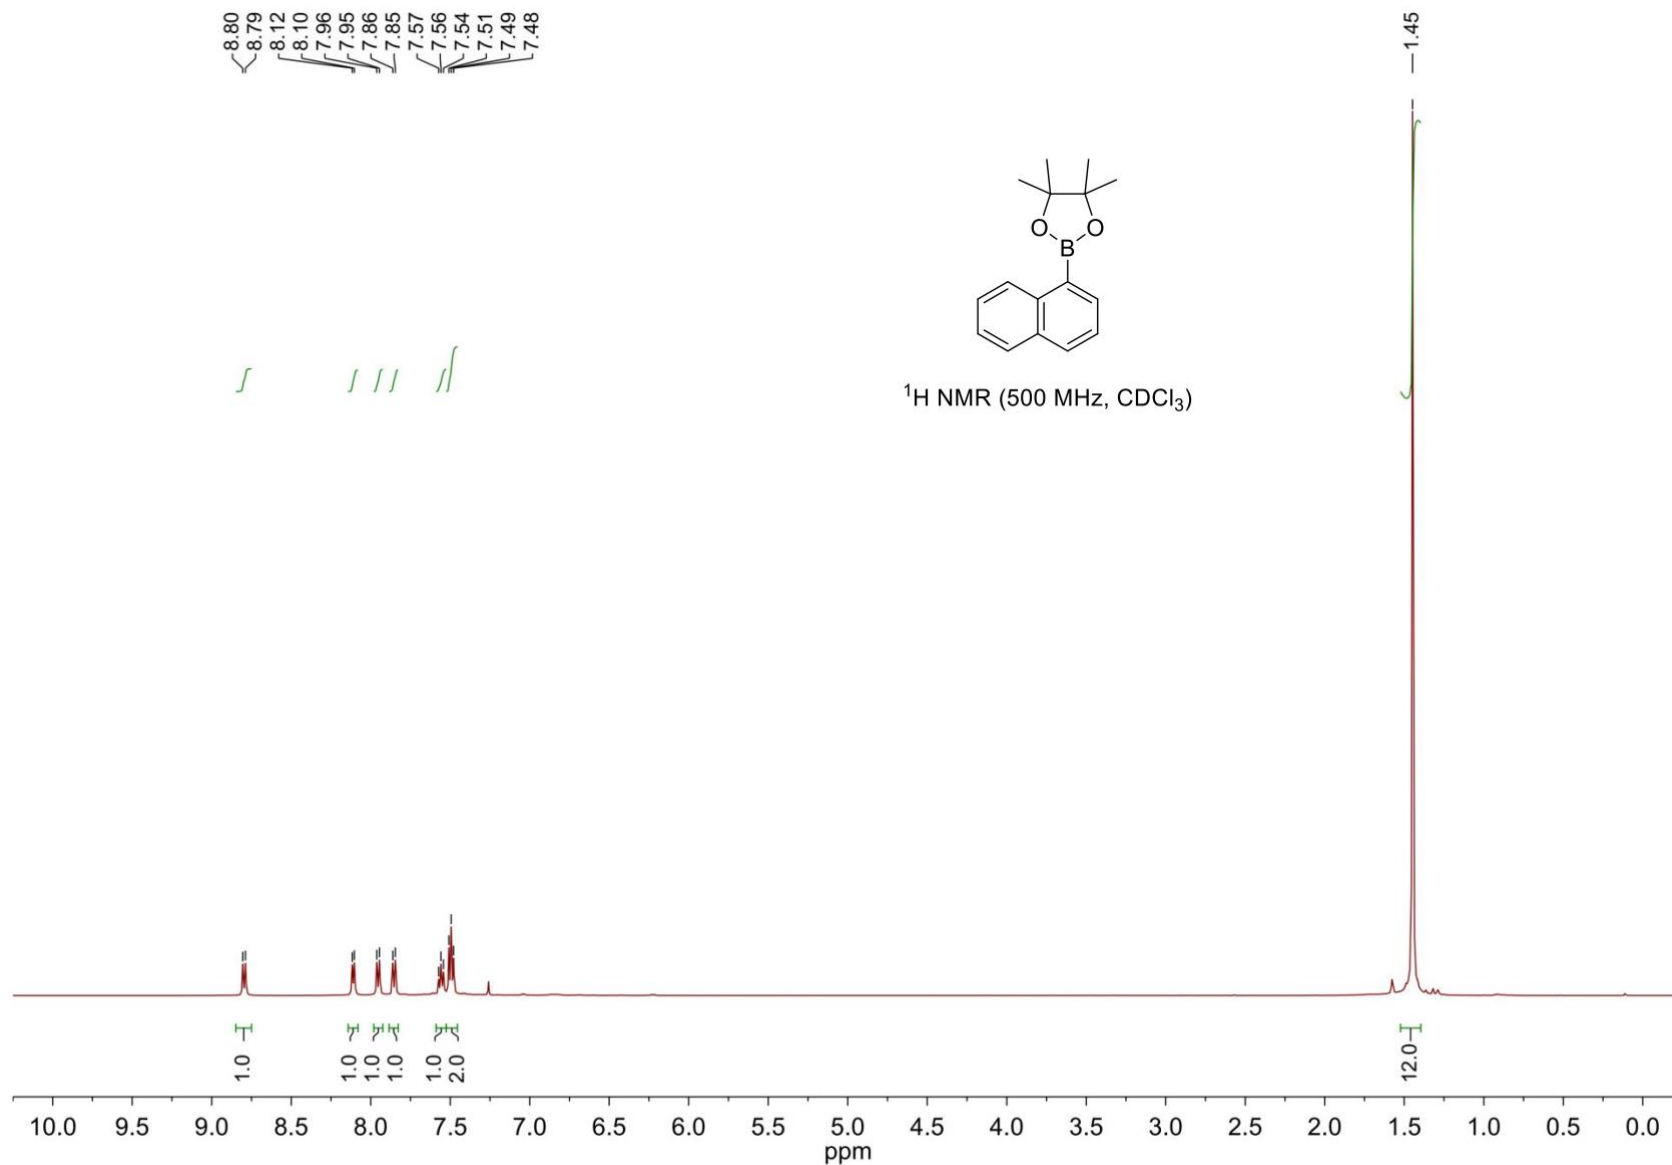

S333

# 4,4,5,5-Tetramethyl-2-(naphthalen-1-yl)-1,3,2-dioxaborolane (30)

137.1  
135.8  
133.3  
131.7  
128.5  
126.5  
125.6  
125.1

83.9

25.1

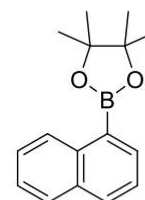

$^{13}\text{C}$  NMR (125 MHz,  $\text{CDCl}_3$ )

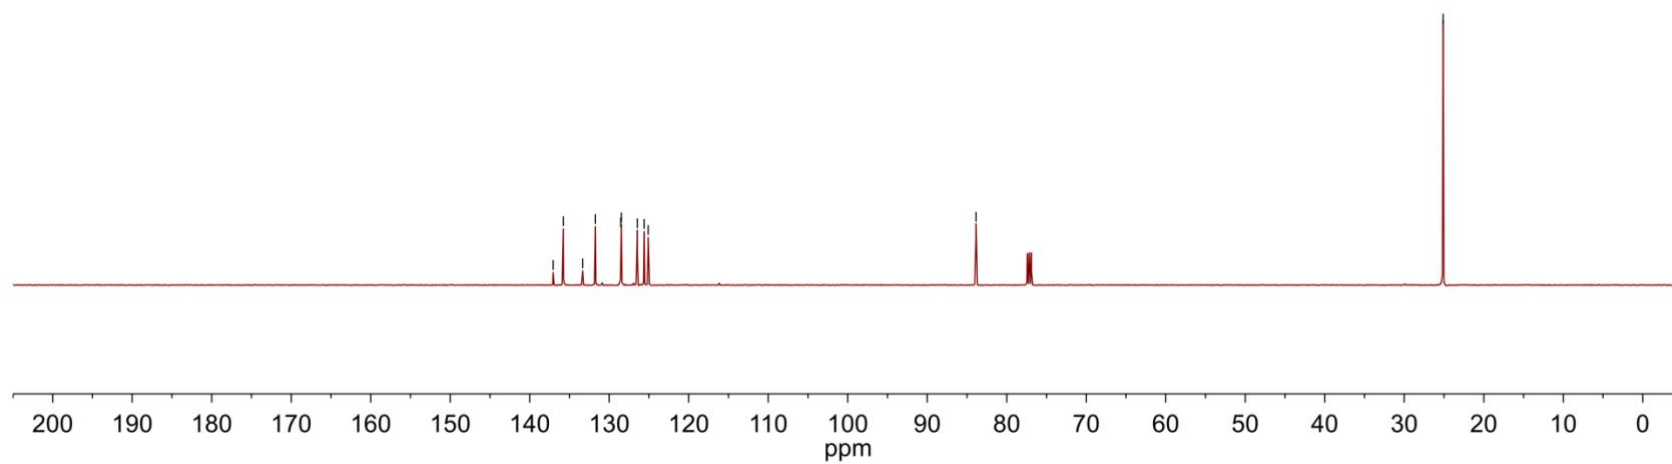

(8*R*,9*S*,13*S*,14*S*)-13-Methyl-3-(trifluoro-14-boraneyl)-6,7,8,9,11,12,13,14,15,16-decahydro-17*H*-cyclopenta[*a*]phenanthren-17-one, potassium salt (31)

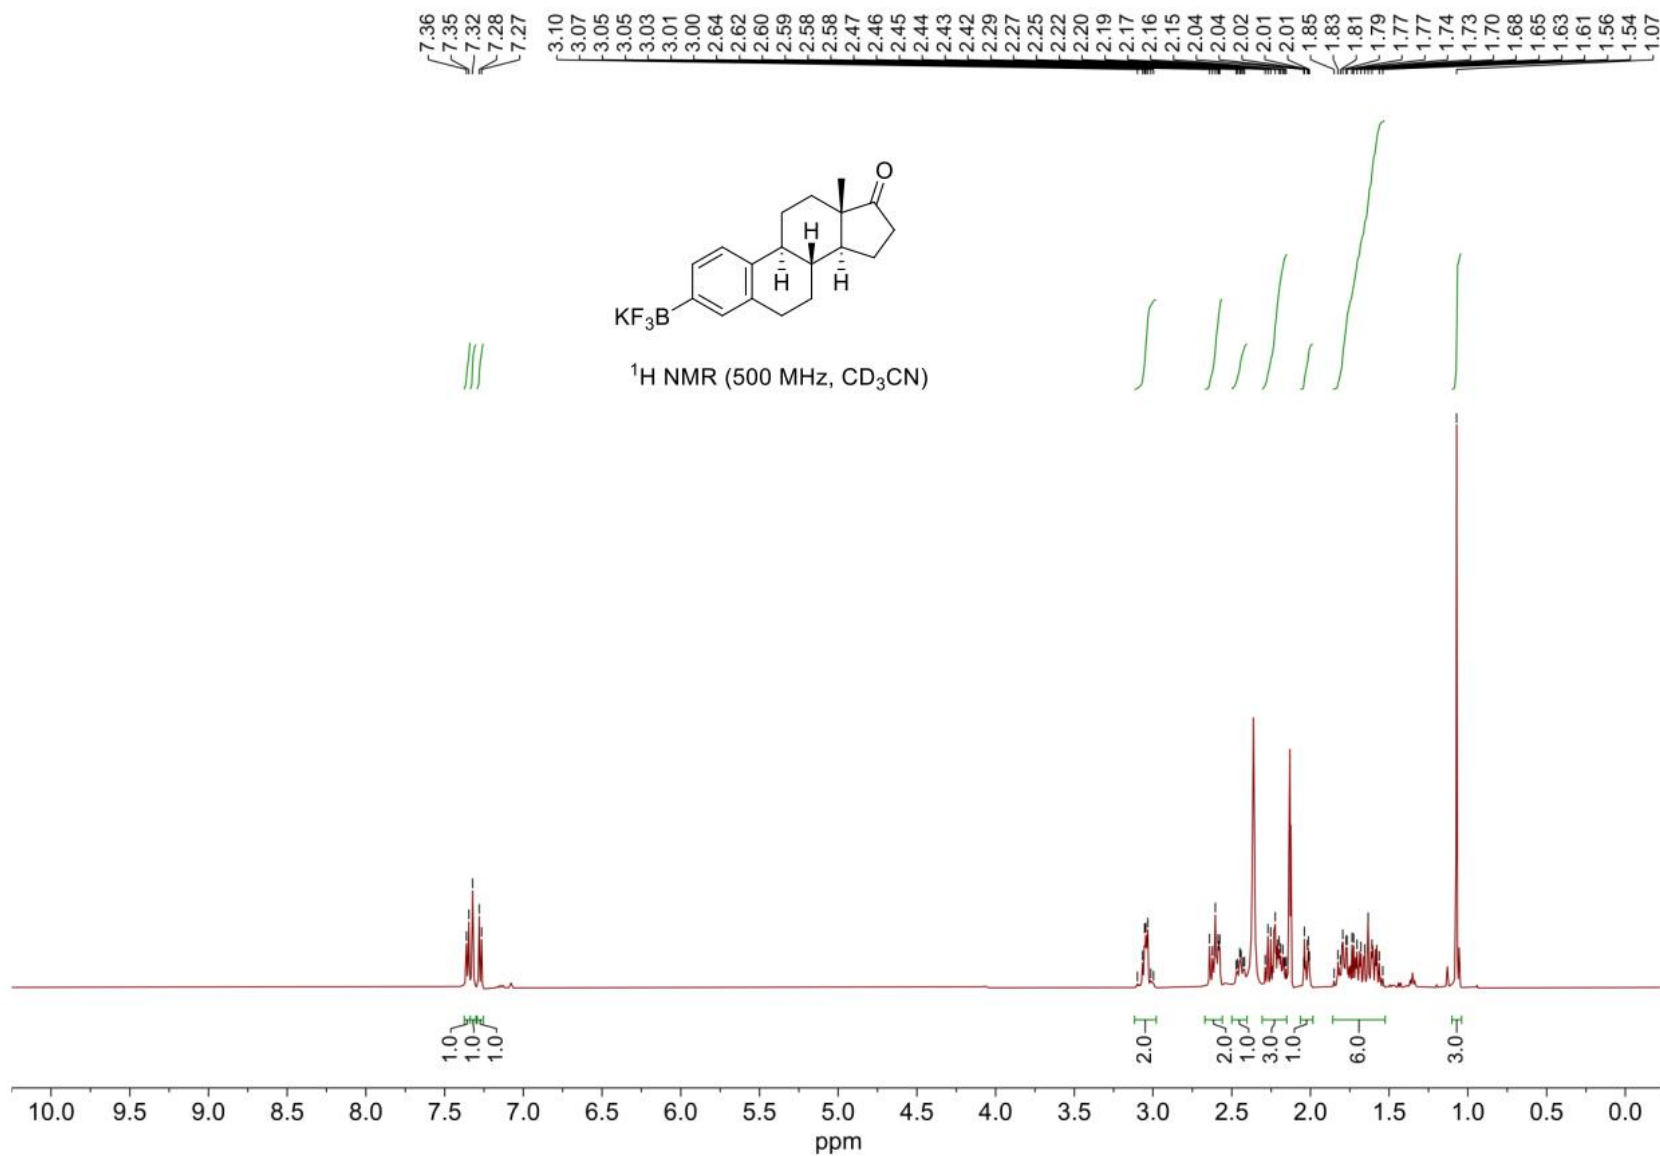

S335

(8*R*,9*S*,13*S*,14*S*)-13-Methyl-3-(trifluoro-14-boraneyl)-6,7,8,9,11,12,13,14,15,16-decahydro-17*H*-cyclopenta[*a*]phenanthren-17-one, potassium salt (31)

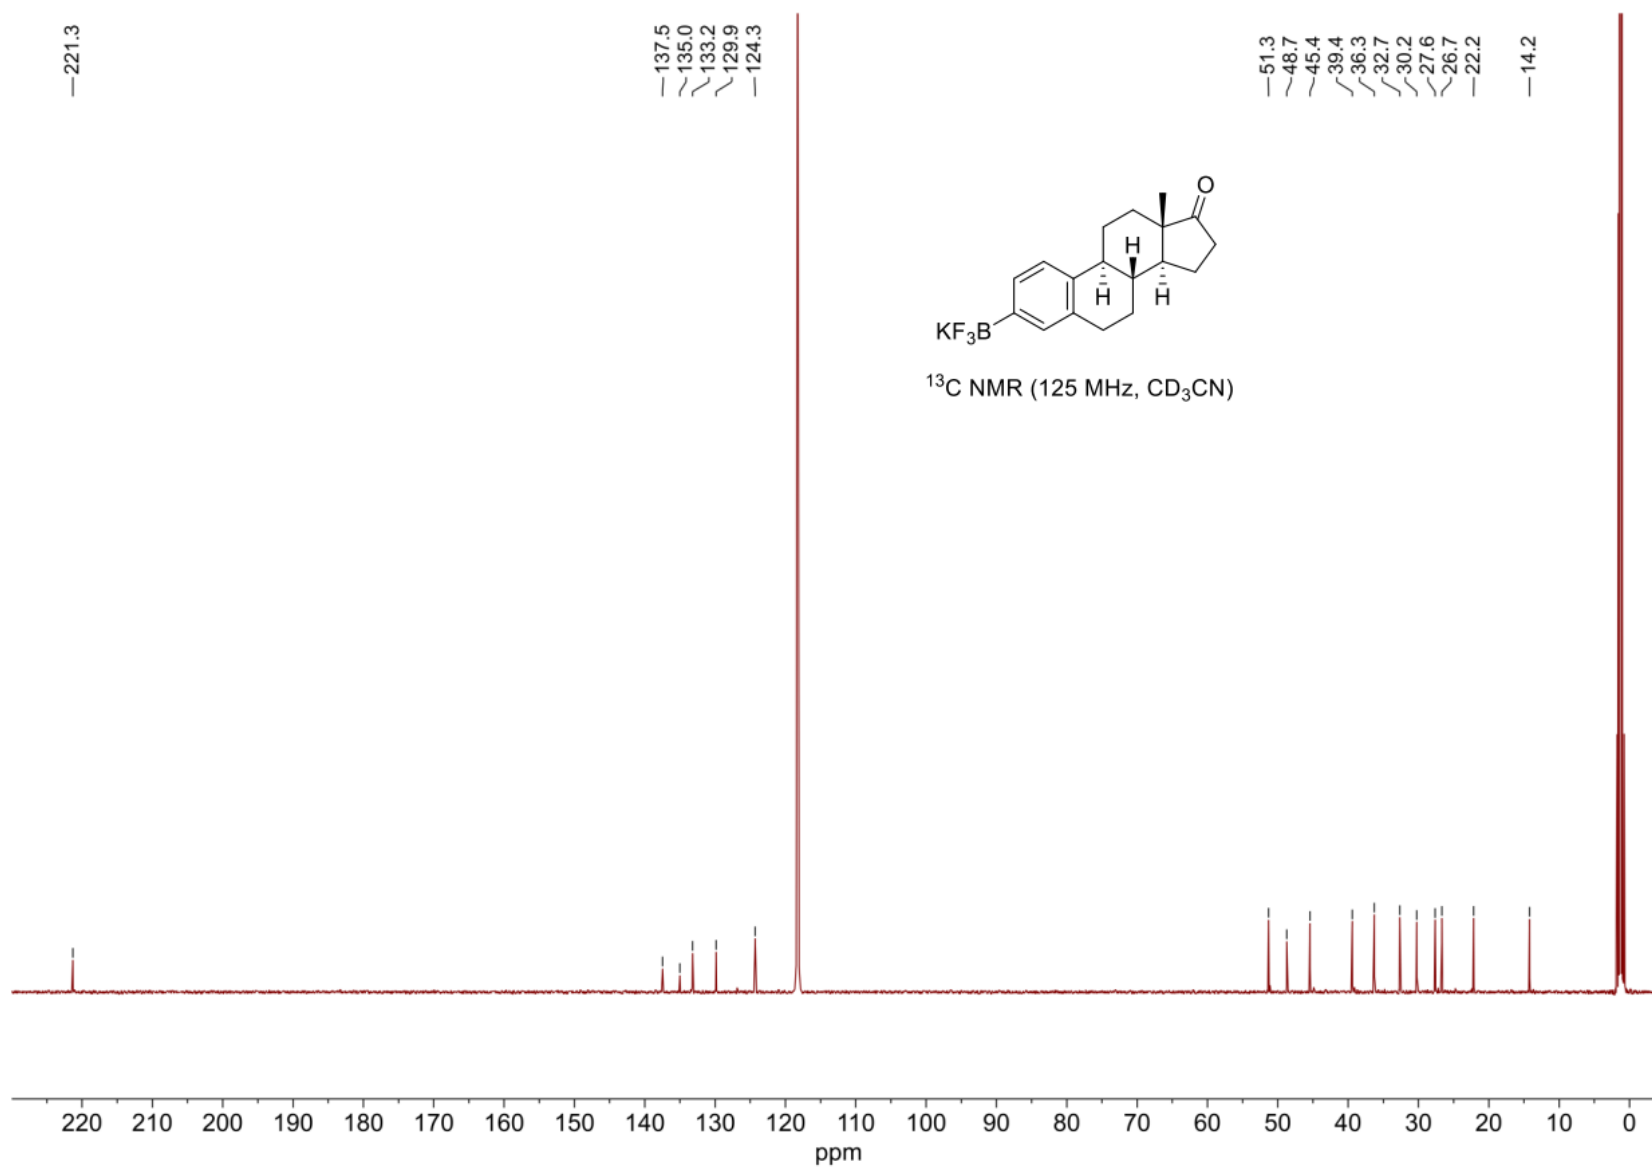

S336



*tert*-Butyldimethyl(((8*R*,9*S*,13*S*,14*S*,17*S*)-13-methyl-3-(4,4,5,5-tetramethyl-1,3,2-dioxaborolan-2-yl)-7,8,9,11,12,13,14,15,16,17-decahydro-6*H*-cyclopenta[*a*]phenanthren-17-yl)oxy)silane (32)

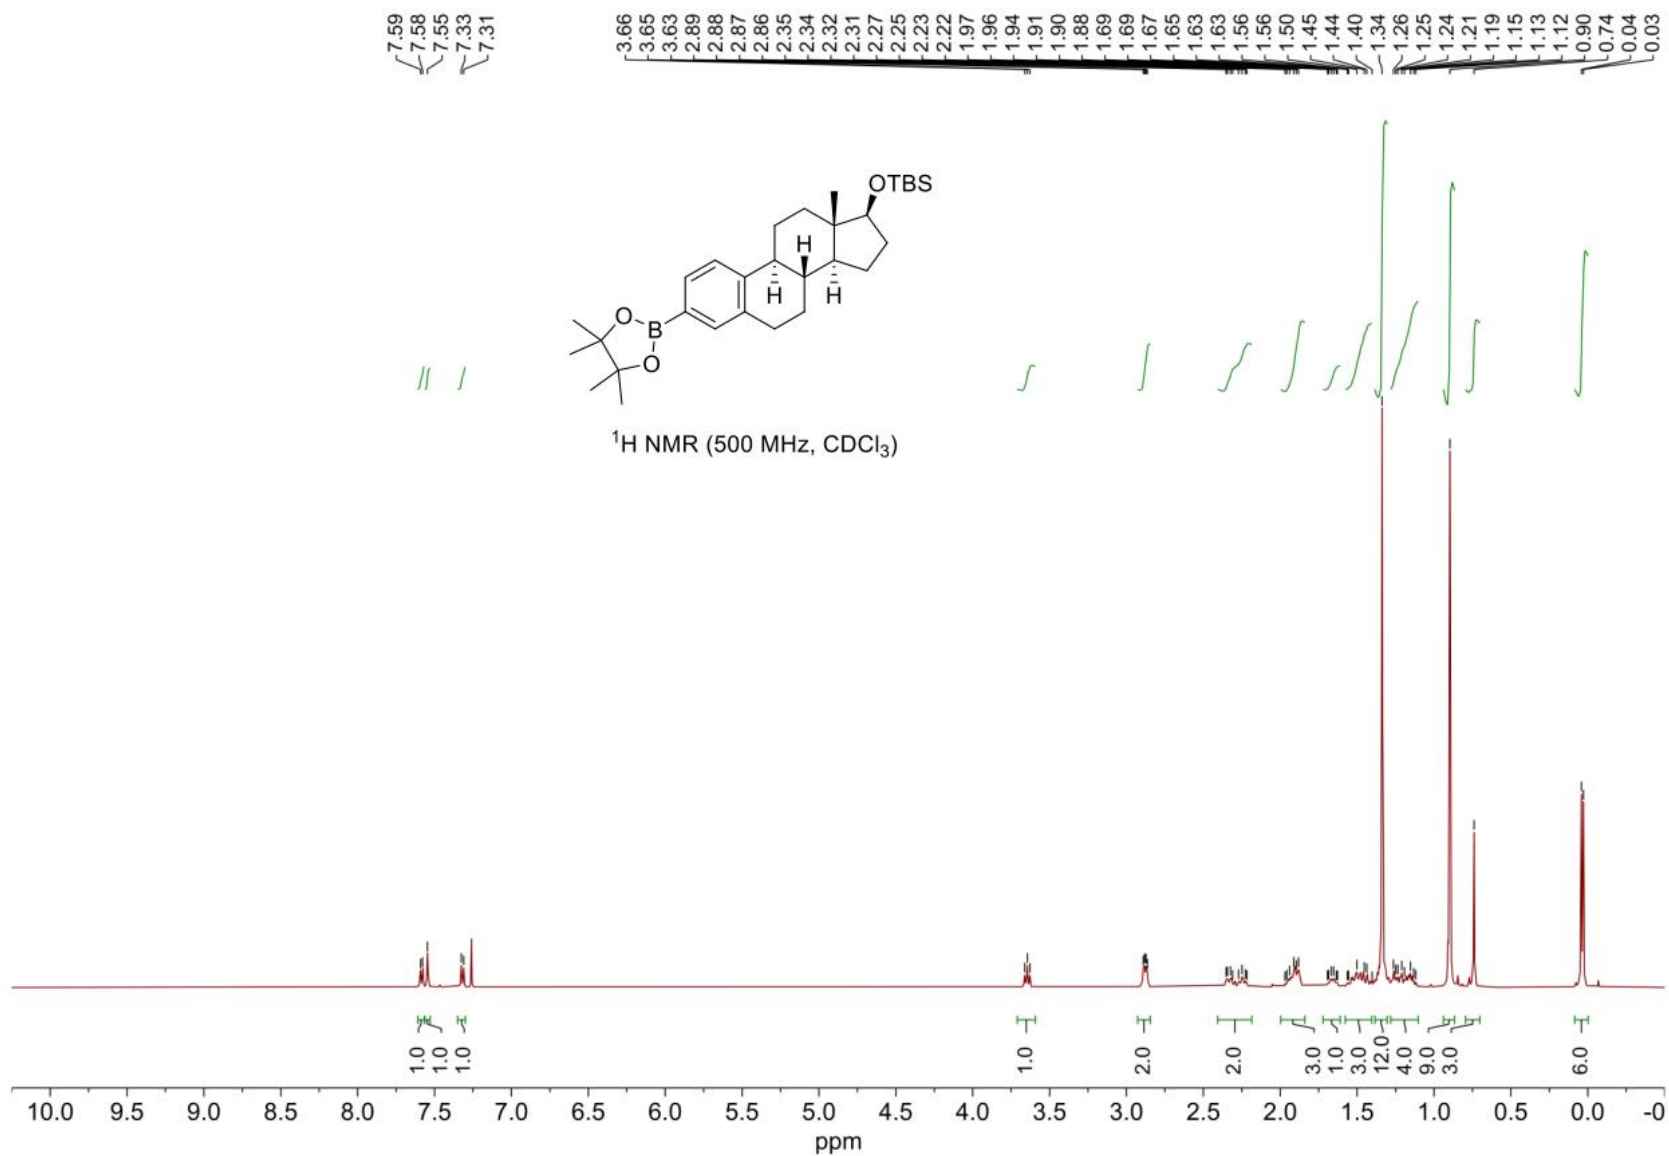

S337

*tert*-Butyldimethyl(((8*R*,9*S*,13*S*,14*S*,17*S*)-13-methyl-3-(4,4,5,5-tetramethyl-1,3,2-dioxaborolan-2-yl)-7,8,9,11,12,13,14,15,16,17-decahydro-6*H*-cyclopenta[*a*]phenanthren-17-yl)oxy)silane (32)

144.2  
136.3  
135.7  
132.1  
125.0  
83.7  
81.9  
50.0  
45.0  
43.7  
38.7  
37.3  
31.1  
29.5  
27.4  
26.3  
26.0  
25.0  
24.9  
23.4  
18.3  
11.5  
4.3  
-4.6

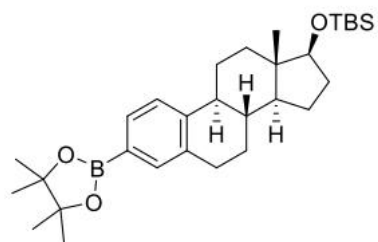

$^{13}\text{C}$  NMR (125 MHz,  $\text{CDCl}_3$ )

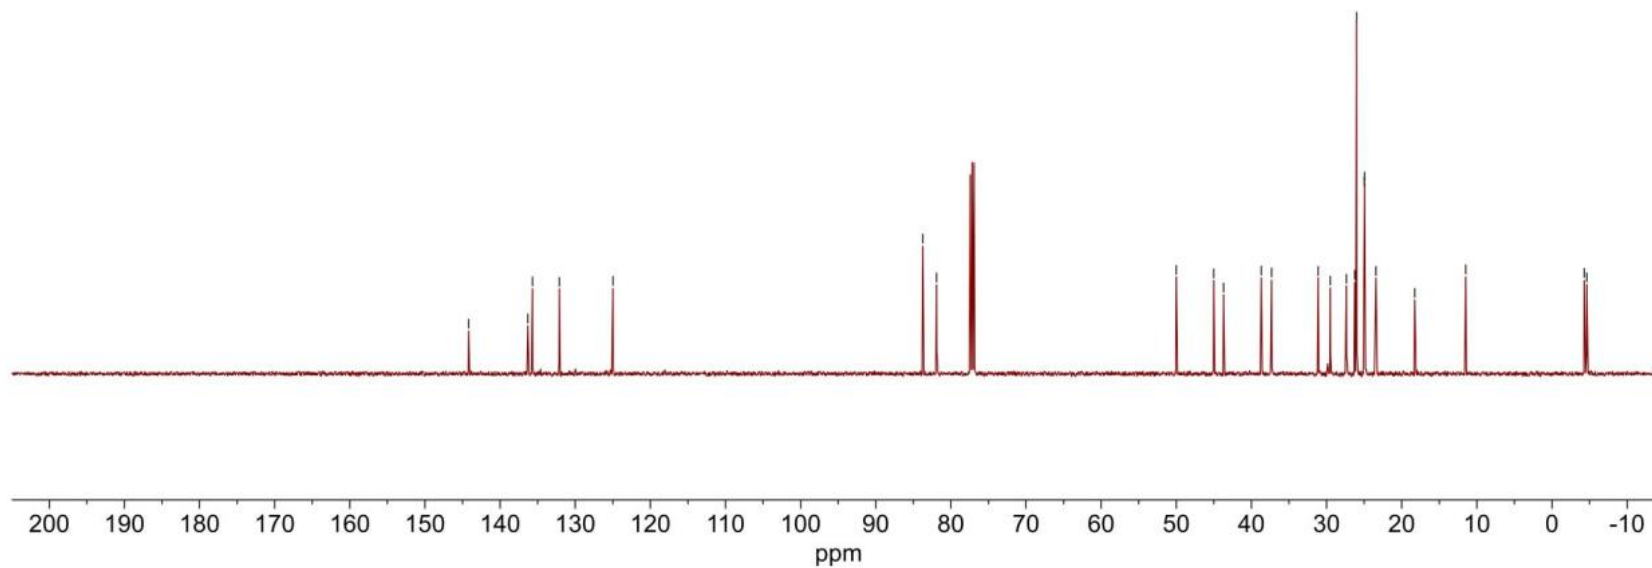

S338

Ethyl (S)-2-acetamido-3-(4-(trifluoro- $\lambda^4$ -boraneyl)phenyl)propanoate, potassium salt (33)

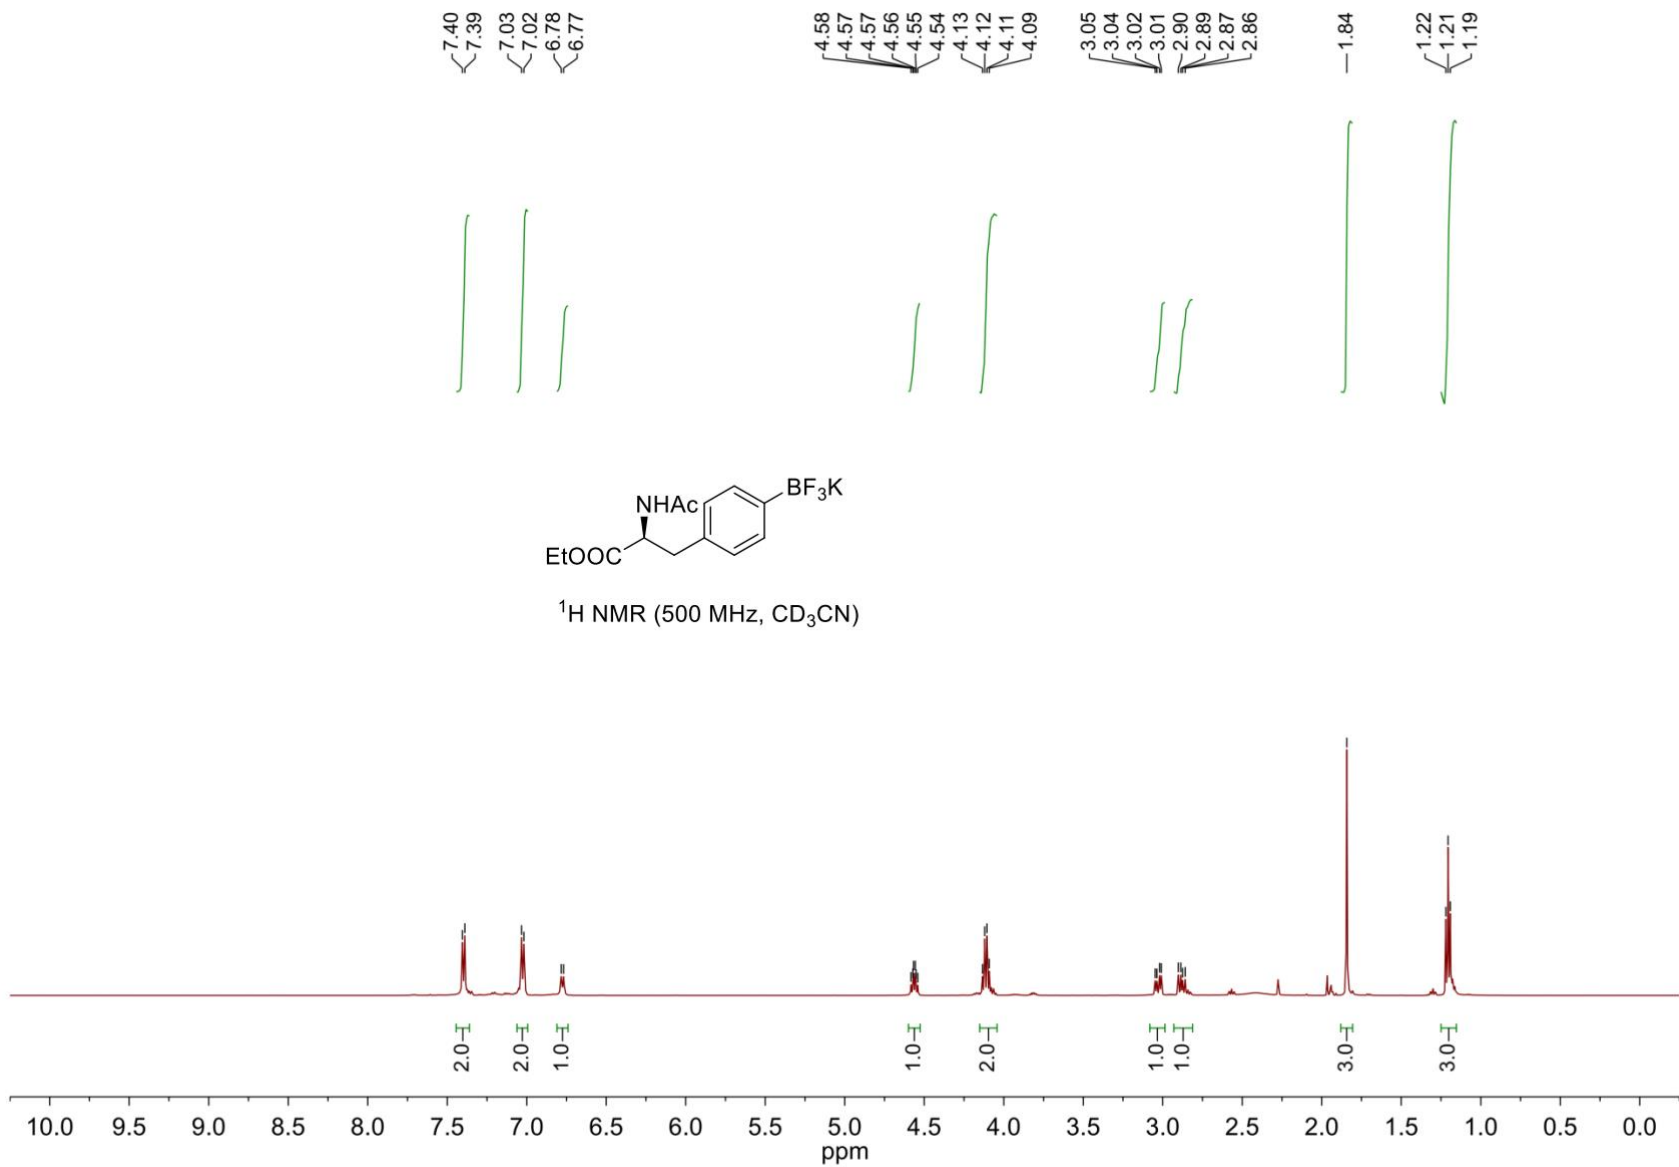

S339

Ethyl (S)-2-acetamido-3-(4-(trifluoro- $\lambda^4$ -boraneyl)phenyl)propanoate, potassium salt (33)

172.7  
170.9

134.8  
132.3  
128.6

61.8

55.0

38.2

22.7

14.4

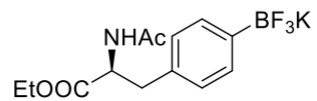

$^{13}\text{C}$  NMR (125 MHz,  $\text{CD}_3\text{CN}$ )

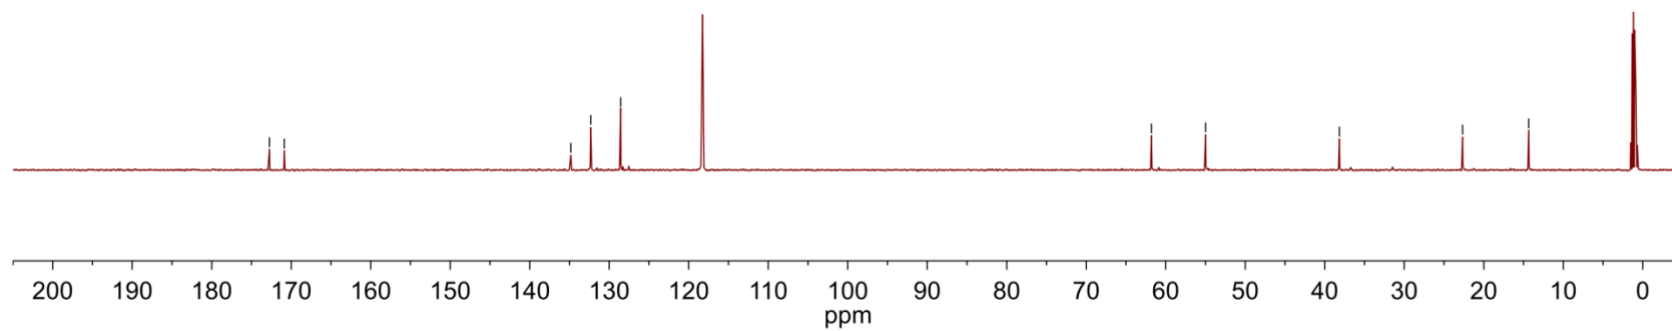

*tert*-Butyl (4-(4,4,5,5-tetramethyl-1,3,2-dioxaborolan-2-yl)phenethyl)carbamate (34)

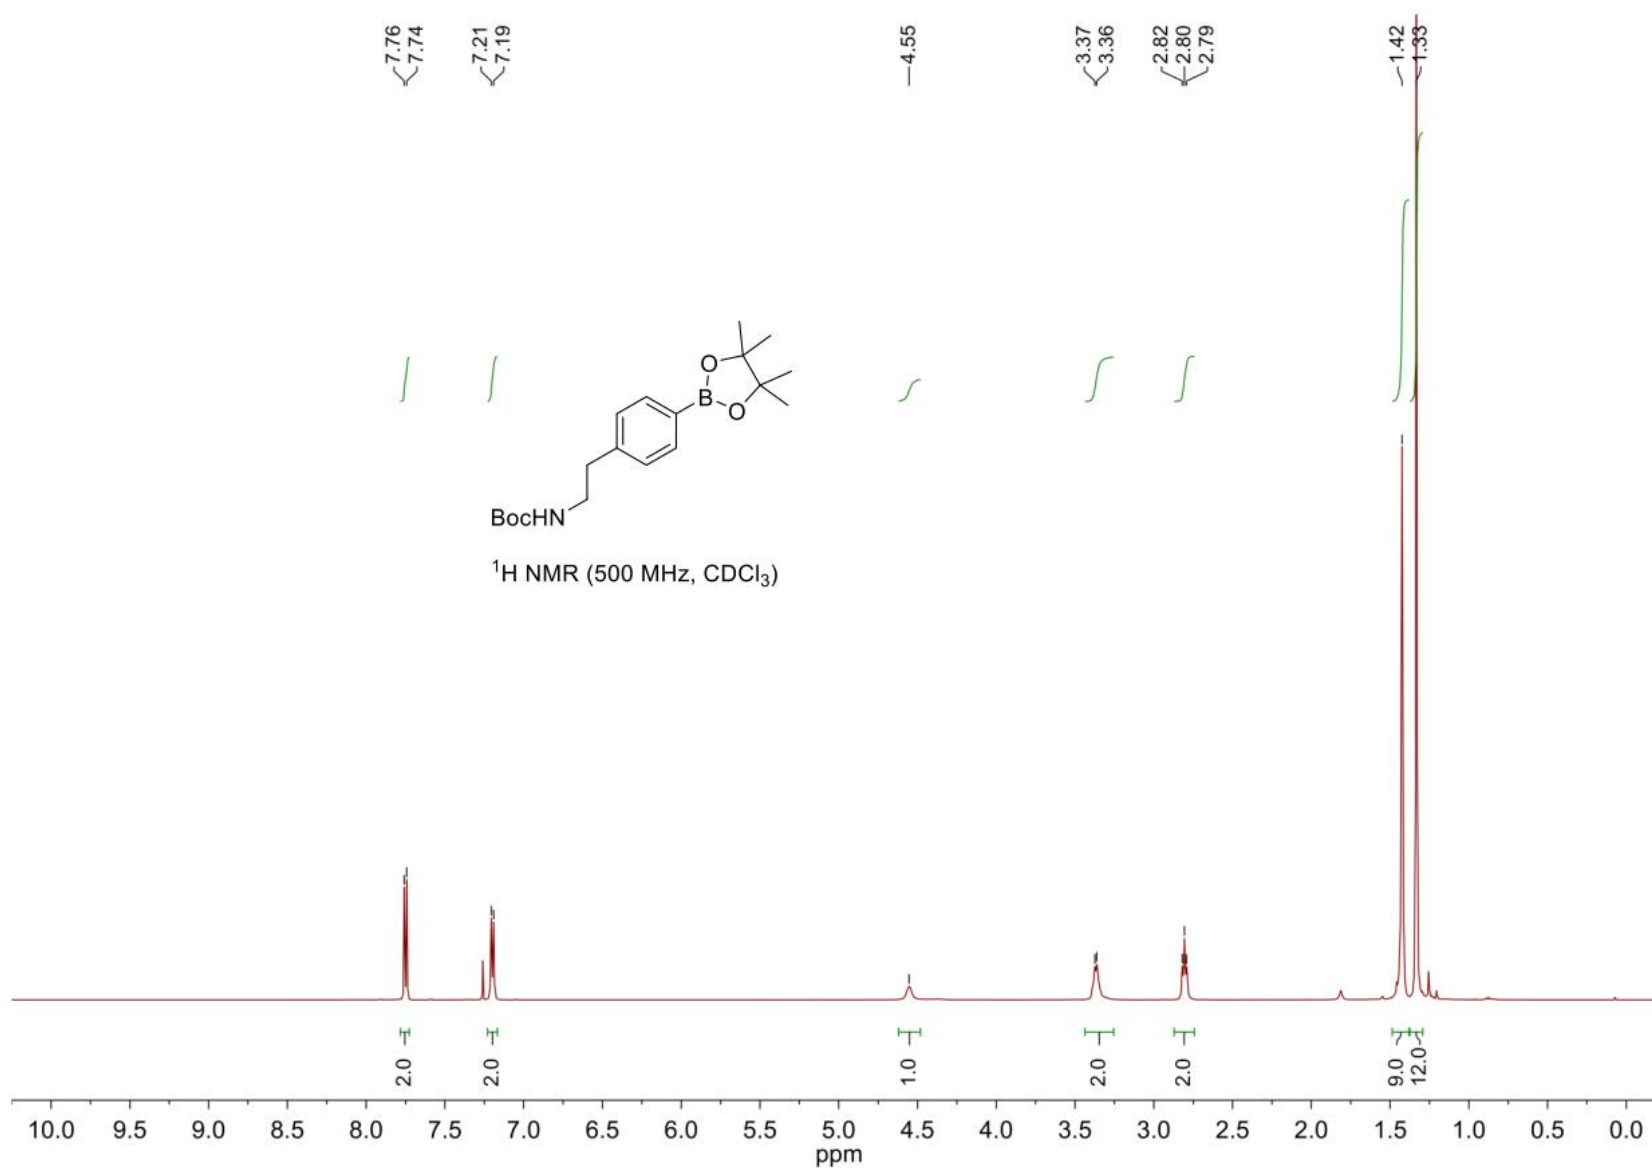

*tert*-Butyl (4-(4,4,5,5-tetramethyl-1,3,2-dioxaborolan-2-yl)phenethyl)carbamate (34)

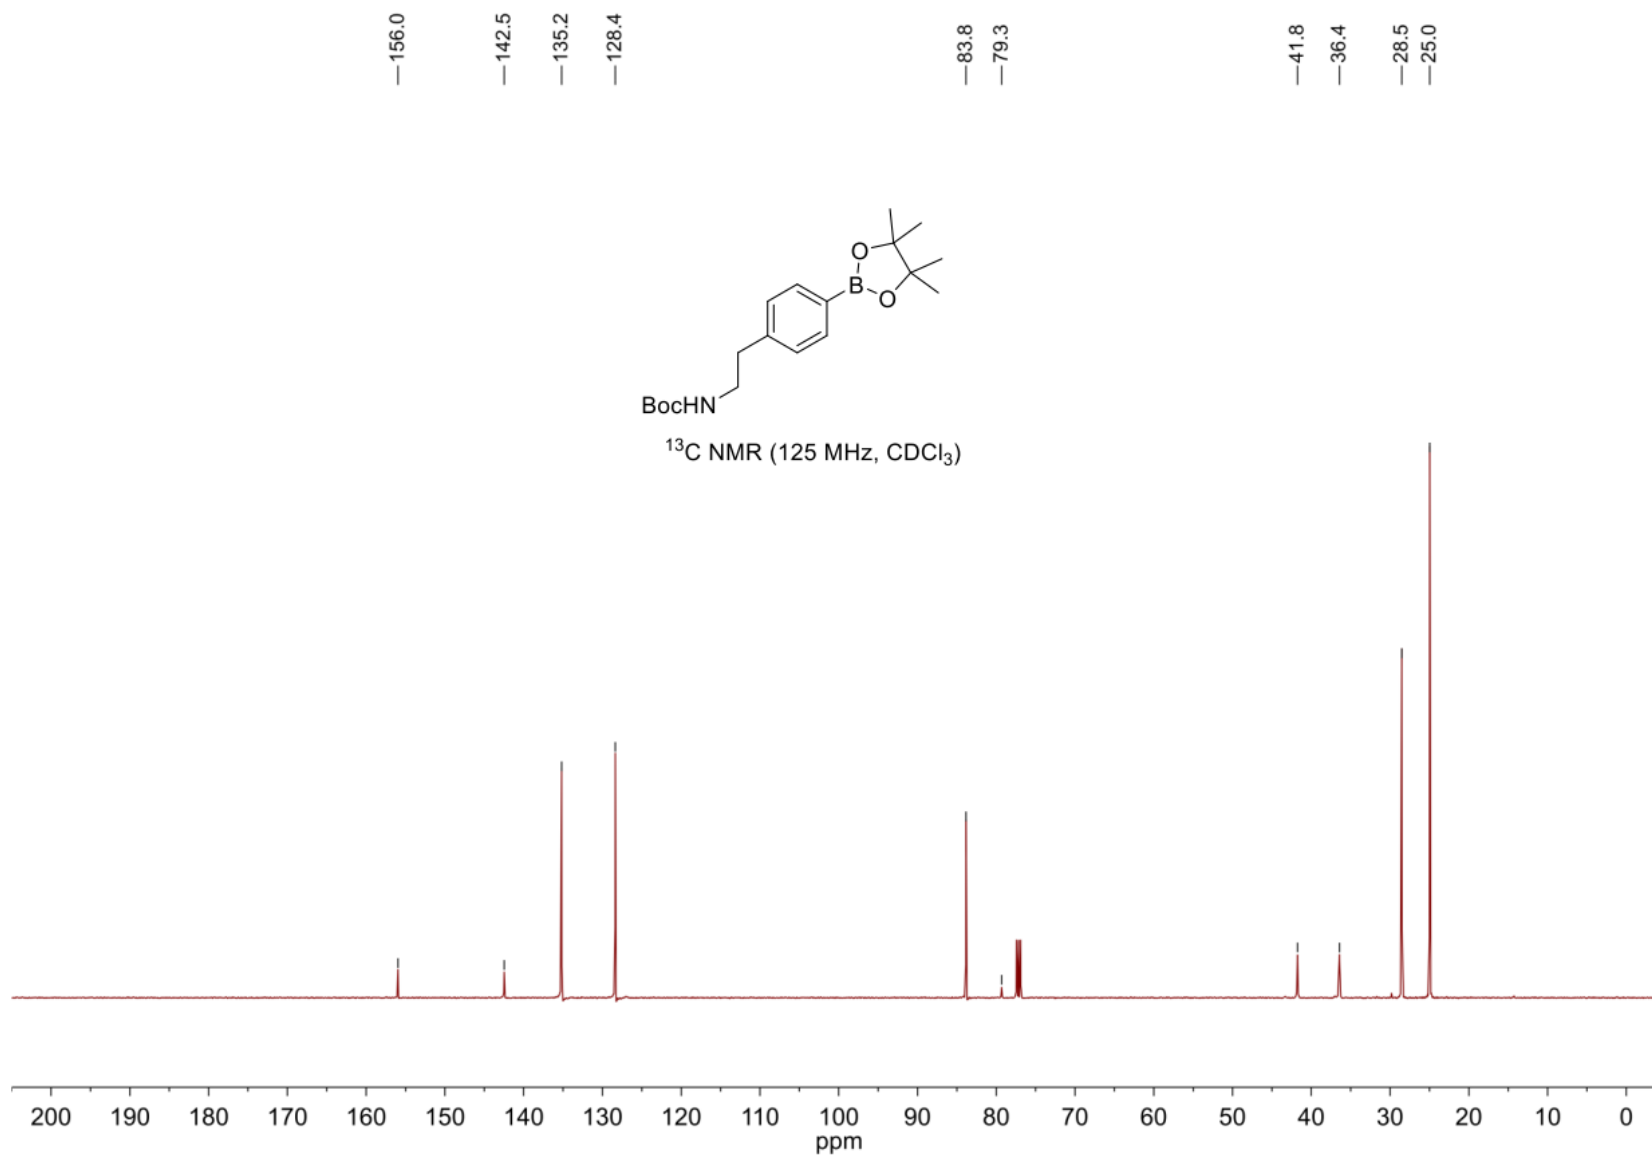

***N*-(2-Morpholinoethyl)-4-(trifluoro- $\lambda^4$ -boraneyl)benzamide, potassium salt (35)**

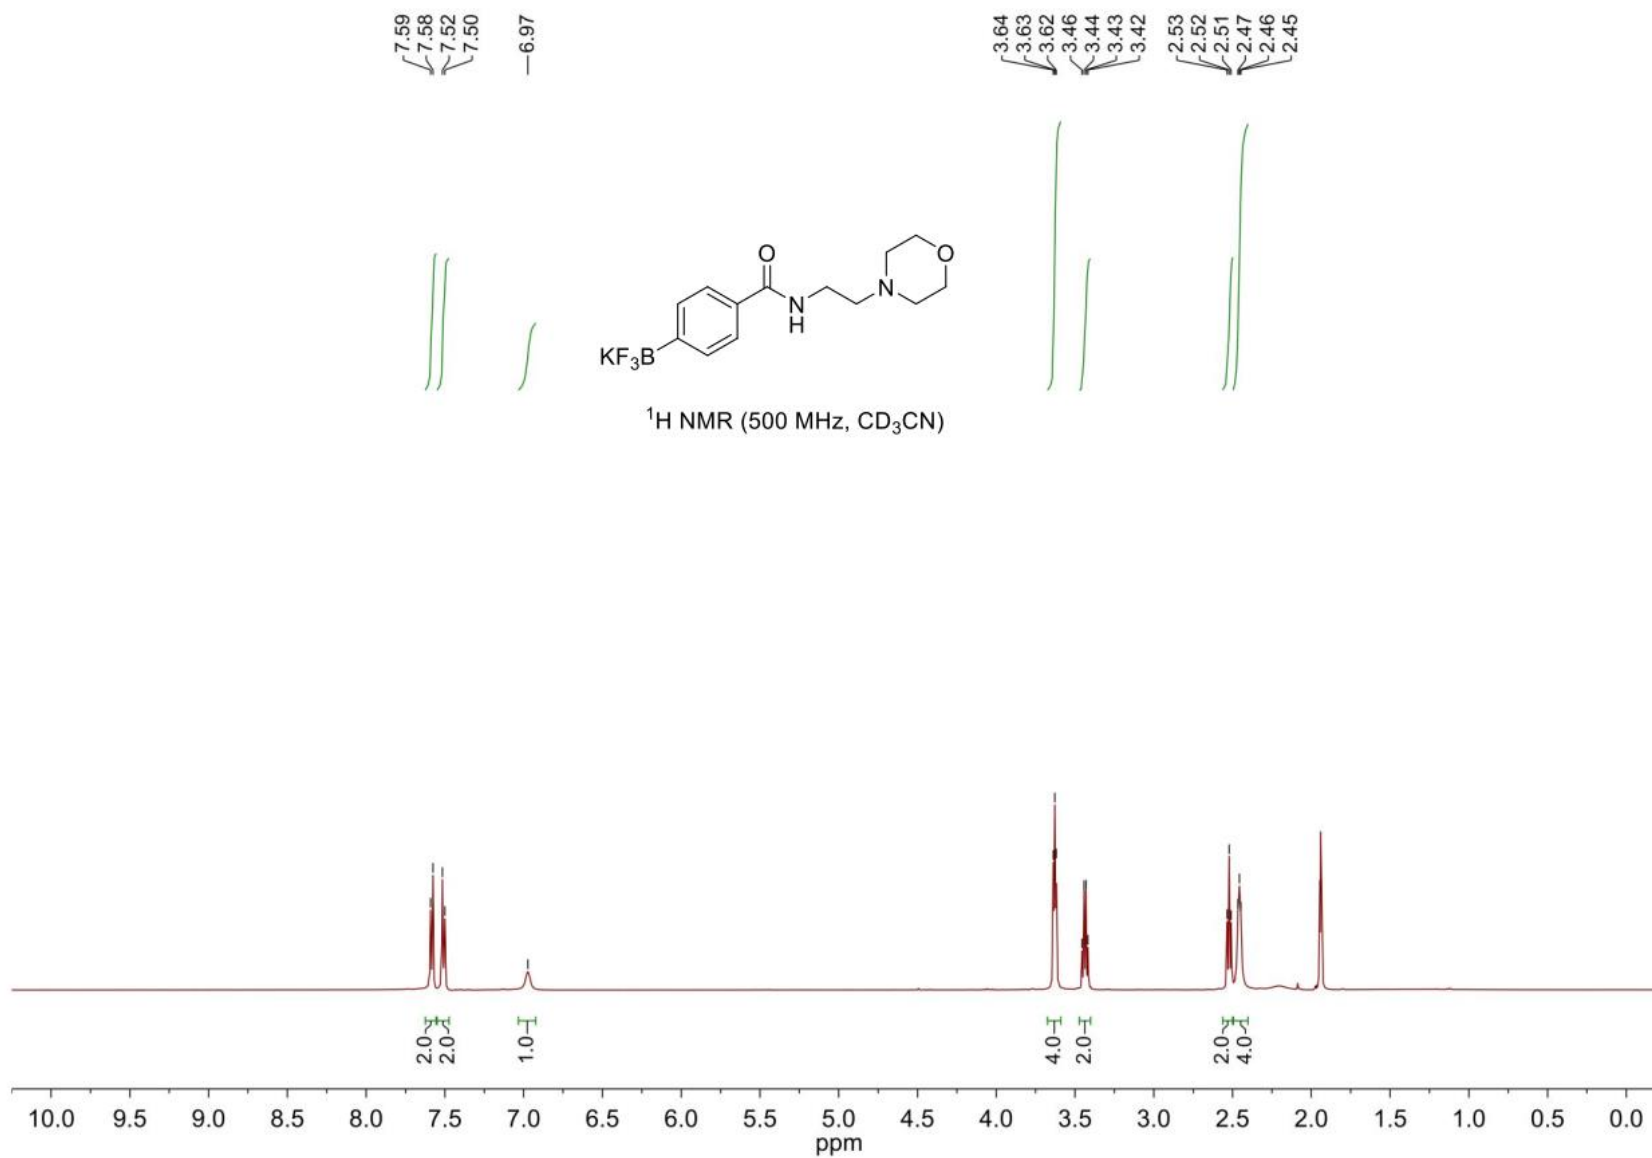

***N*-(2-Morpholinoethyl)-4-(trifluoro- $\lambda^4$ -boraneyl)benzamide, potassium salt (35)**

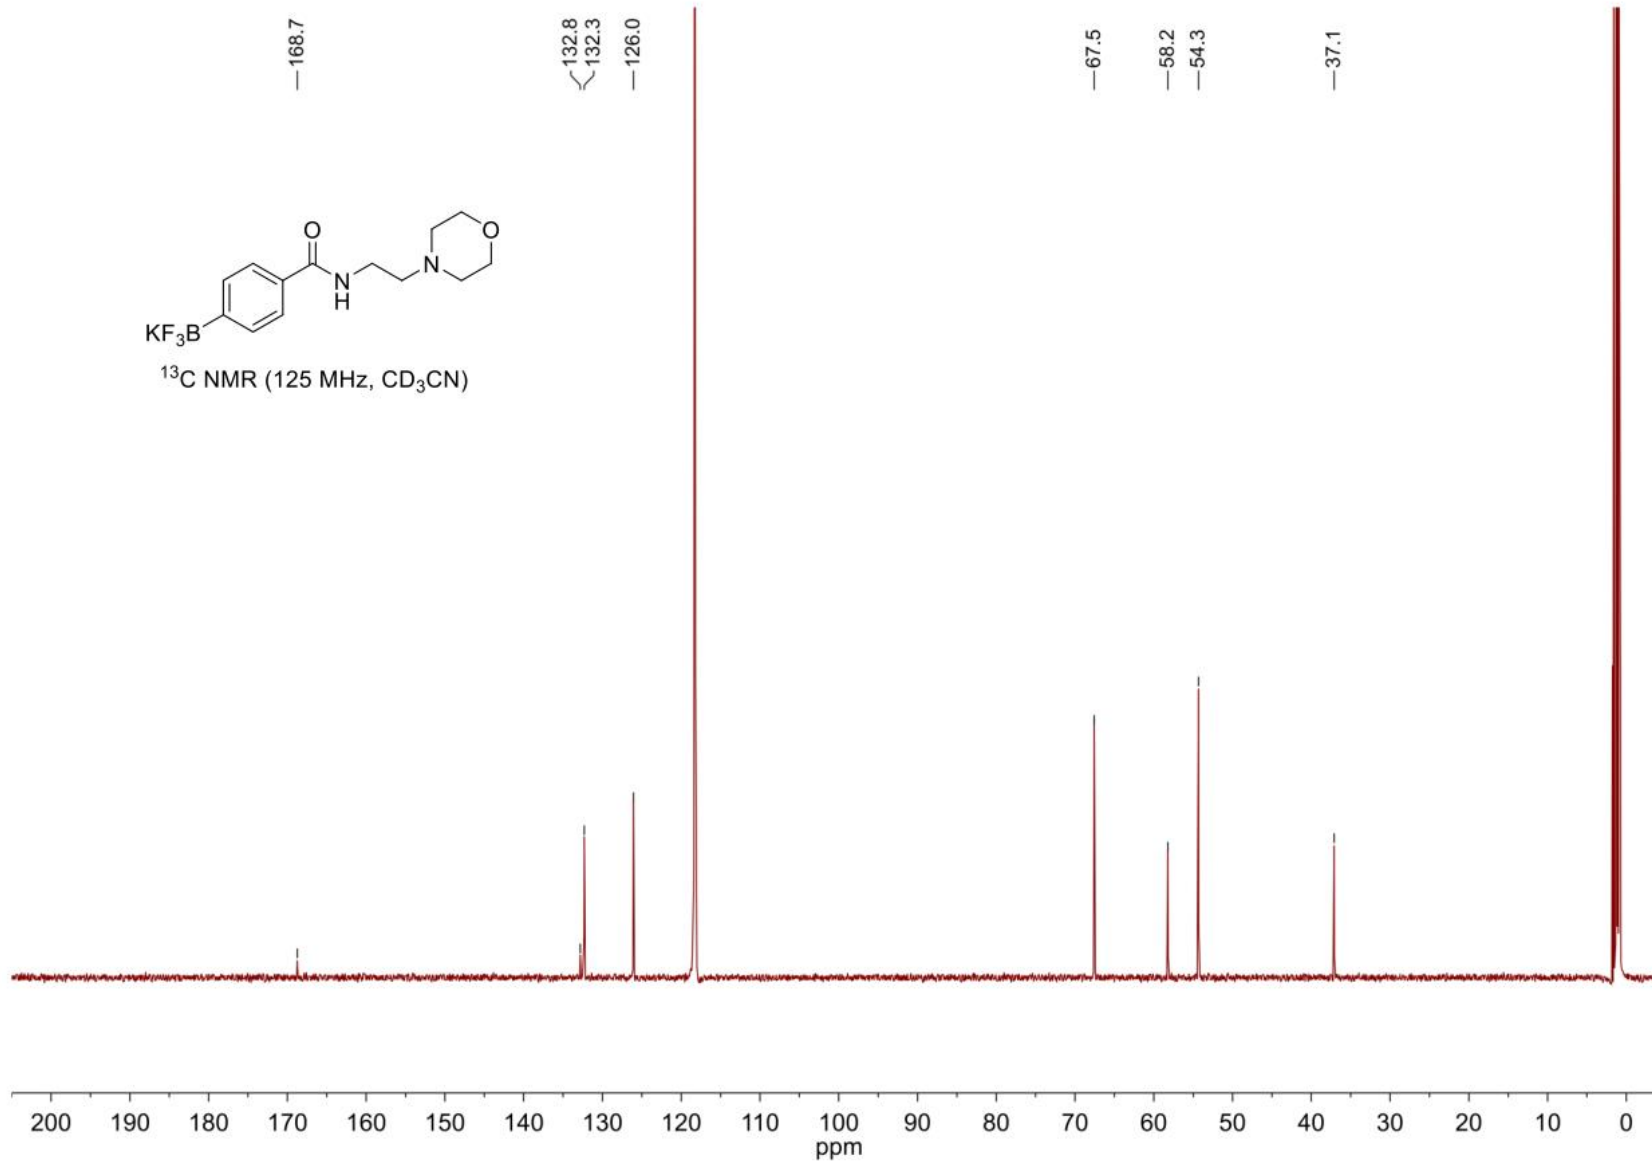



### 2-(2-Ethylphenyl)-4,4,5,5-tetramethyl-1,3,2-dioxaborolane (36)

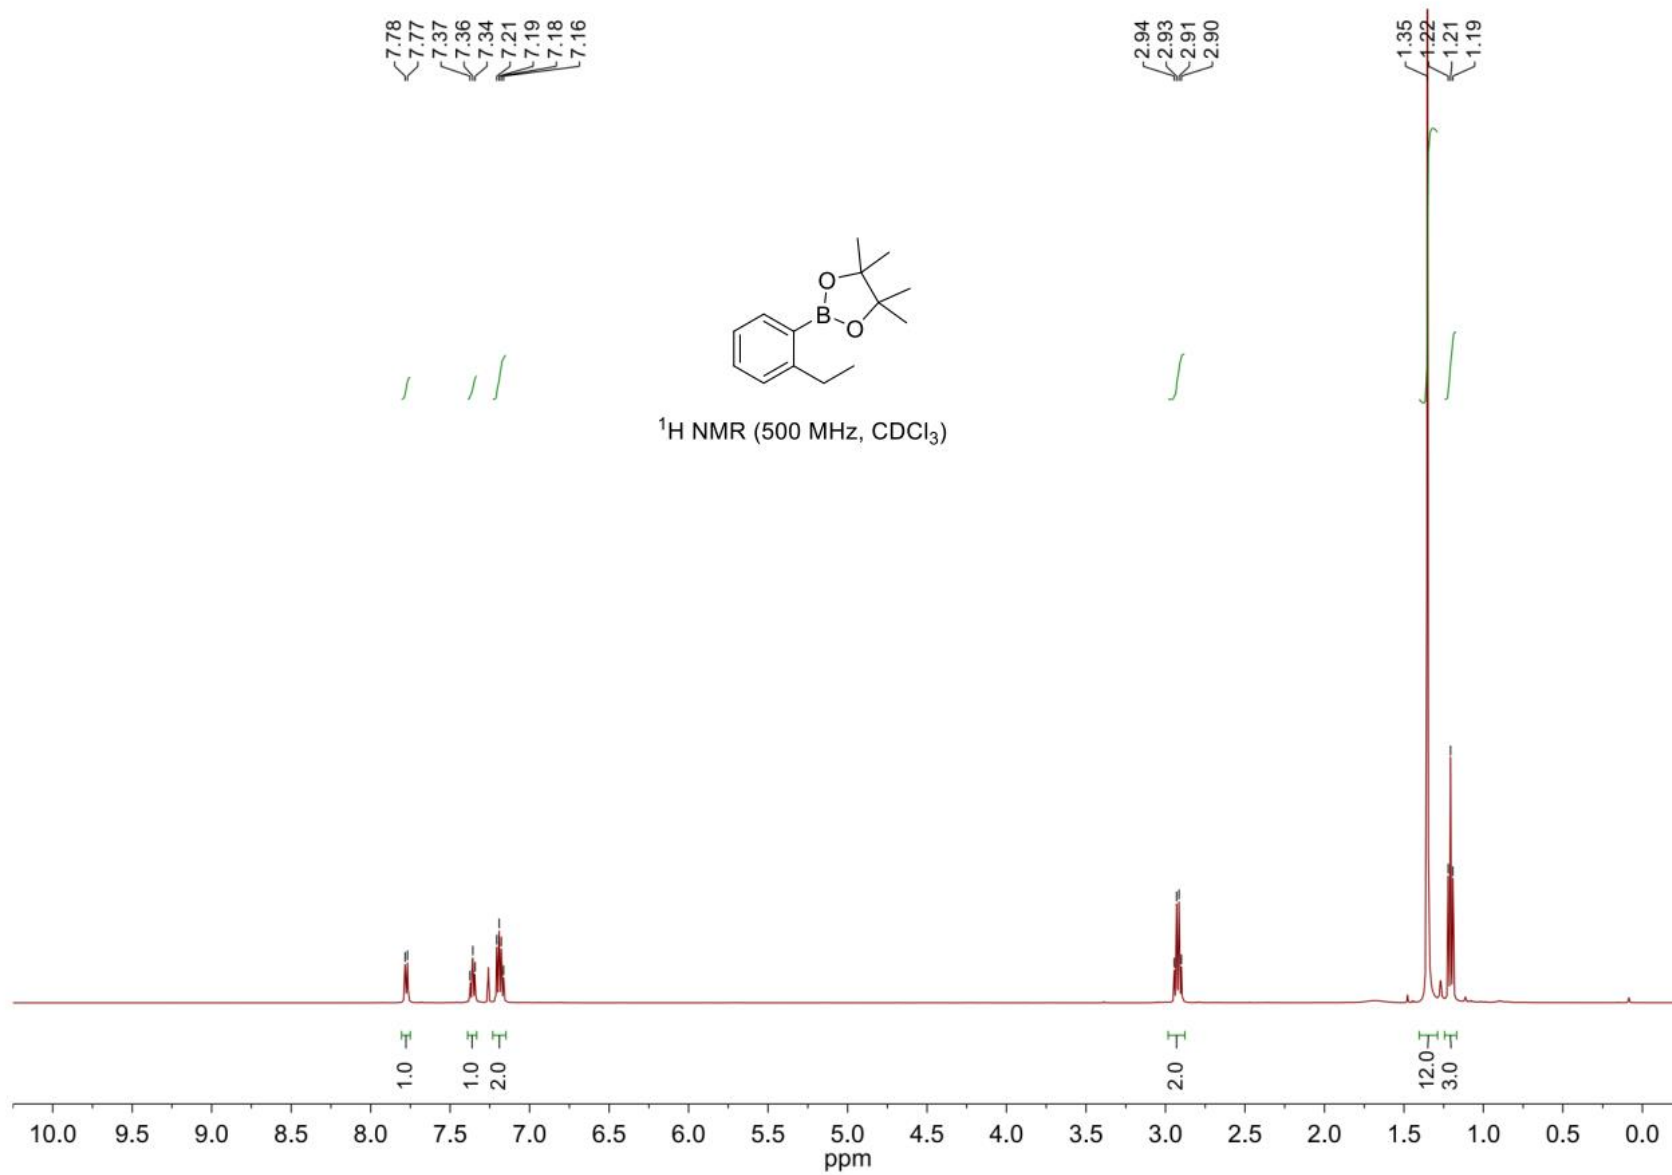

S345

## 2-(2-Ethylphenyl)-4,4,5,5-tetramethyl-1,3,2-dioxaborolane (36)

—151.6  
—136.1  
—131.1  
—128.5  
—125.0  
—83.5  
—29.0  
—25.0  
—17.3

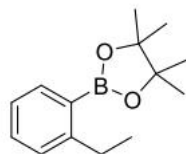

$^{13}\text{C}$  NMR (125 MHz,  $\text{CDCl}_3$ )

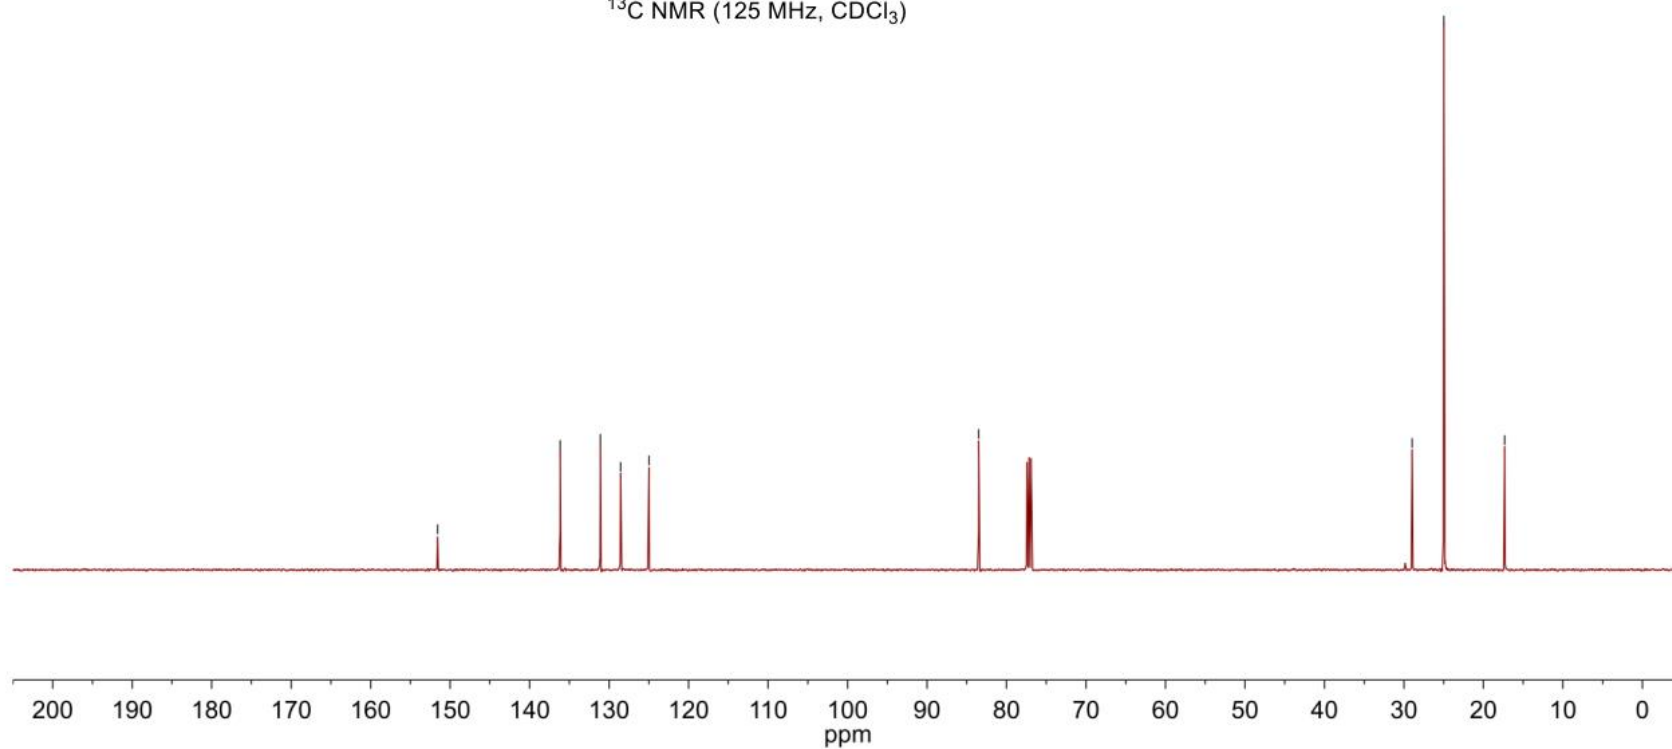

# 2-(3-Ethylphenyl)-4,4,5,5-tetramethyl-1,3,2-dioxaborolane (37)

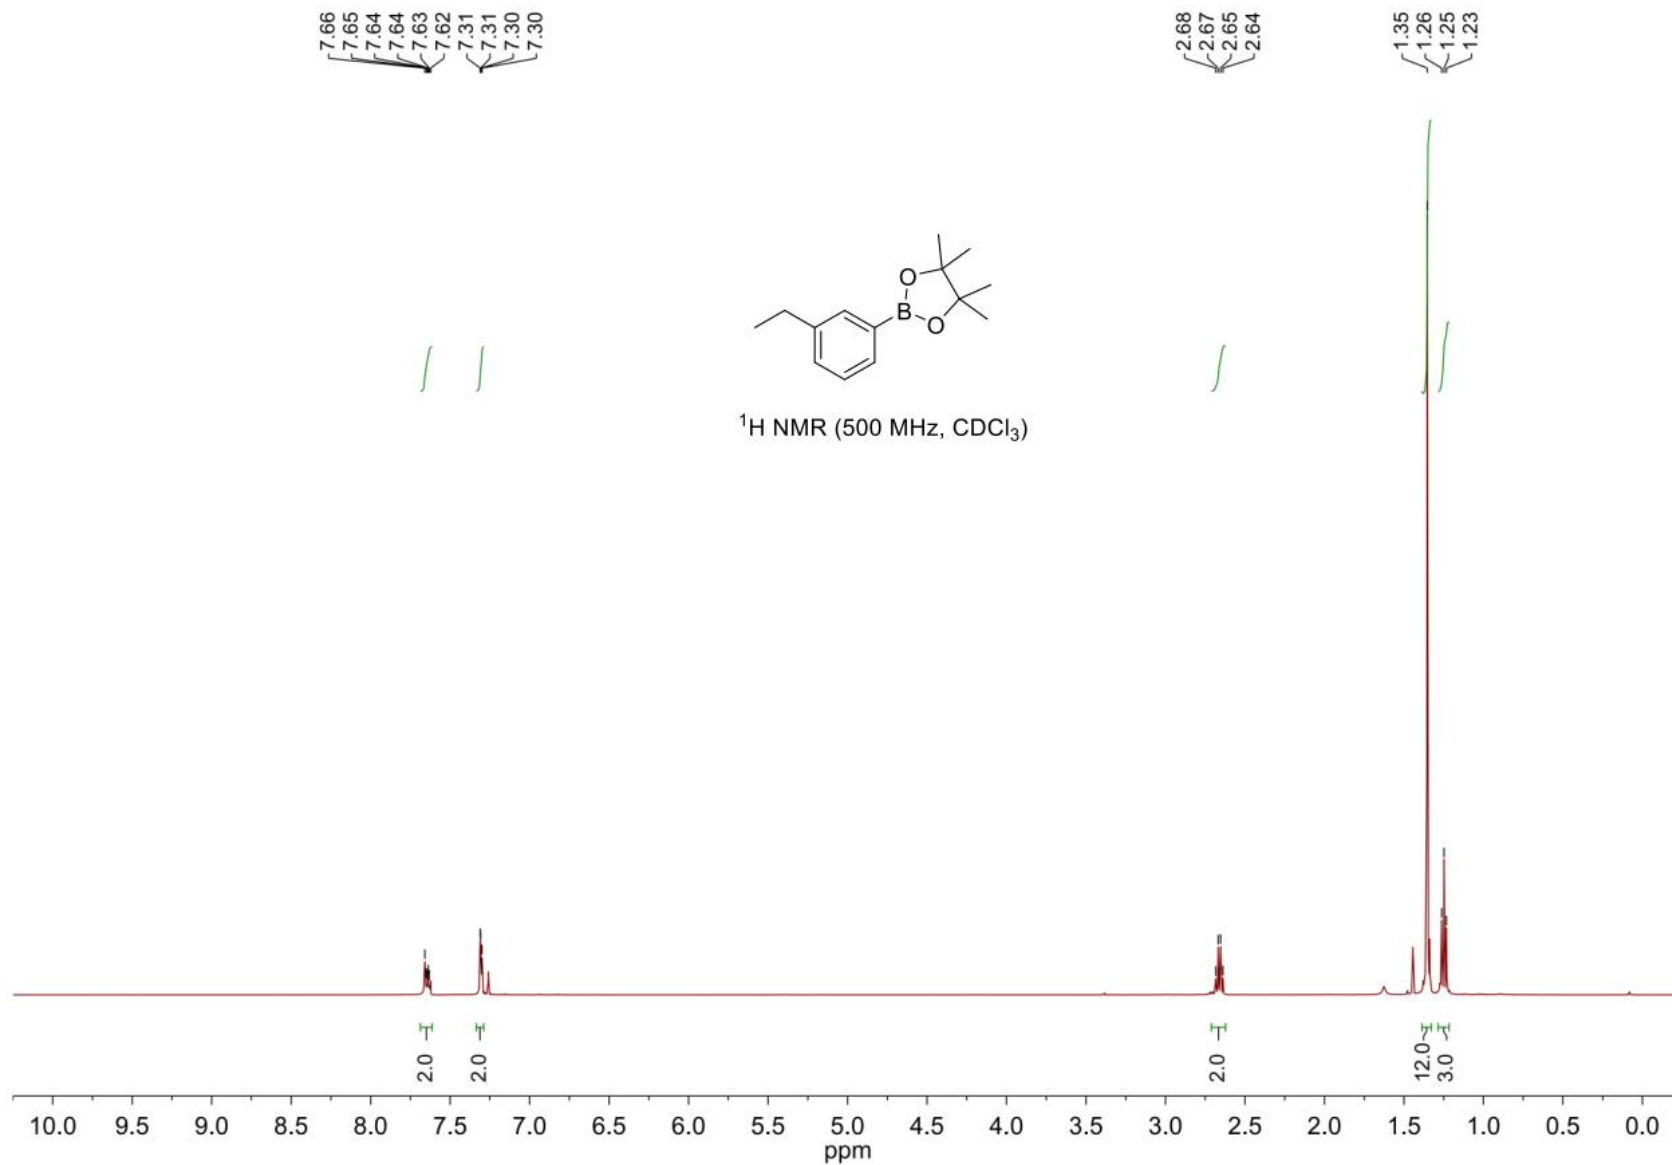

S347

## 2-(3-Ethylphenyl)-4,4,5,5-tetramethyl-1,3,2-dioxaborolane (37)

— 143.6  
~ 134.4  
~ 132.2  
~ 131.0  
~ 127.9

— 83.8

— 29.0  
— 25.0

— 15.9

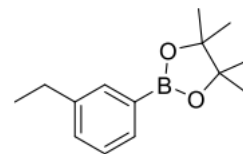

$^1\text{H}$  NMR (500 MHz,  $\text{CDCl}_3$ )

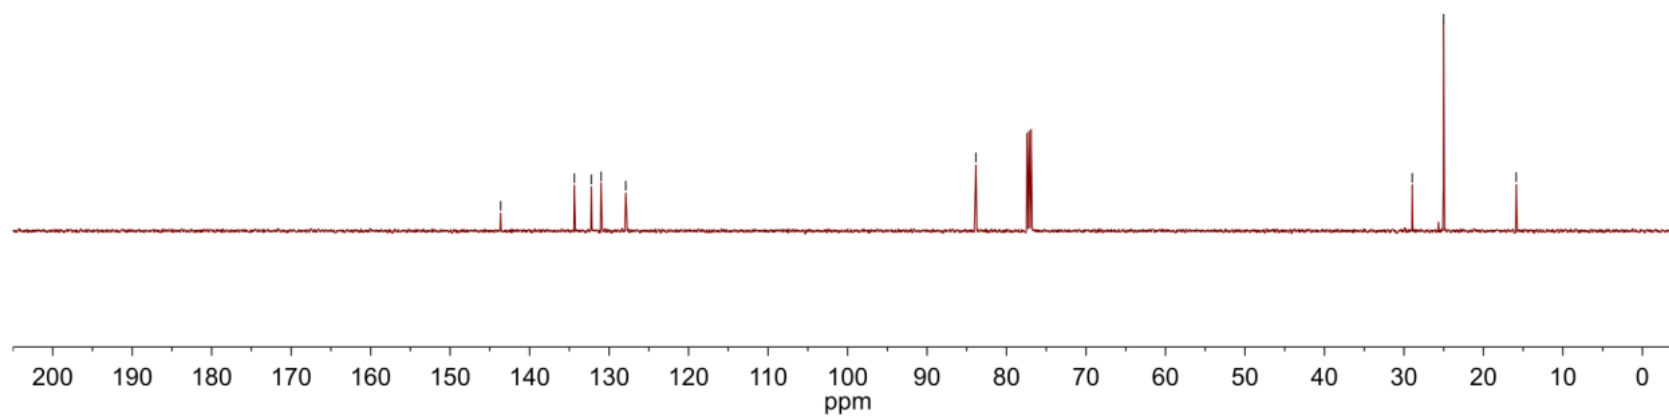

2-(3,5-Dimethylphenyl)-4,4,5,5-tetramethyl-1,3,2-dioxaborolane (38)

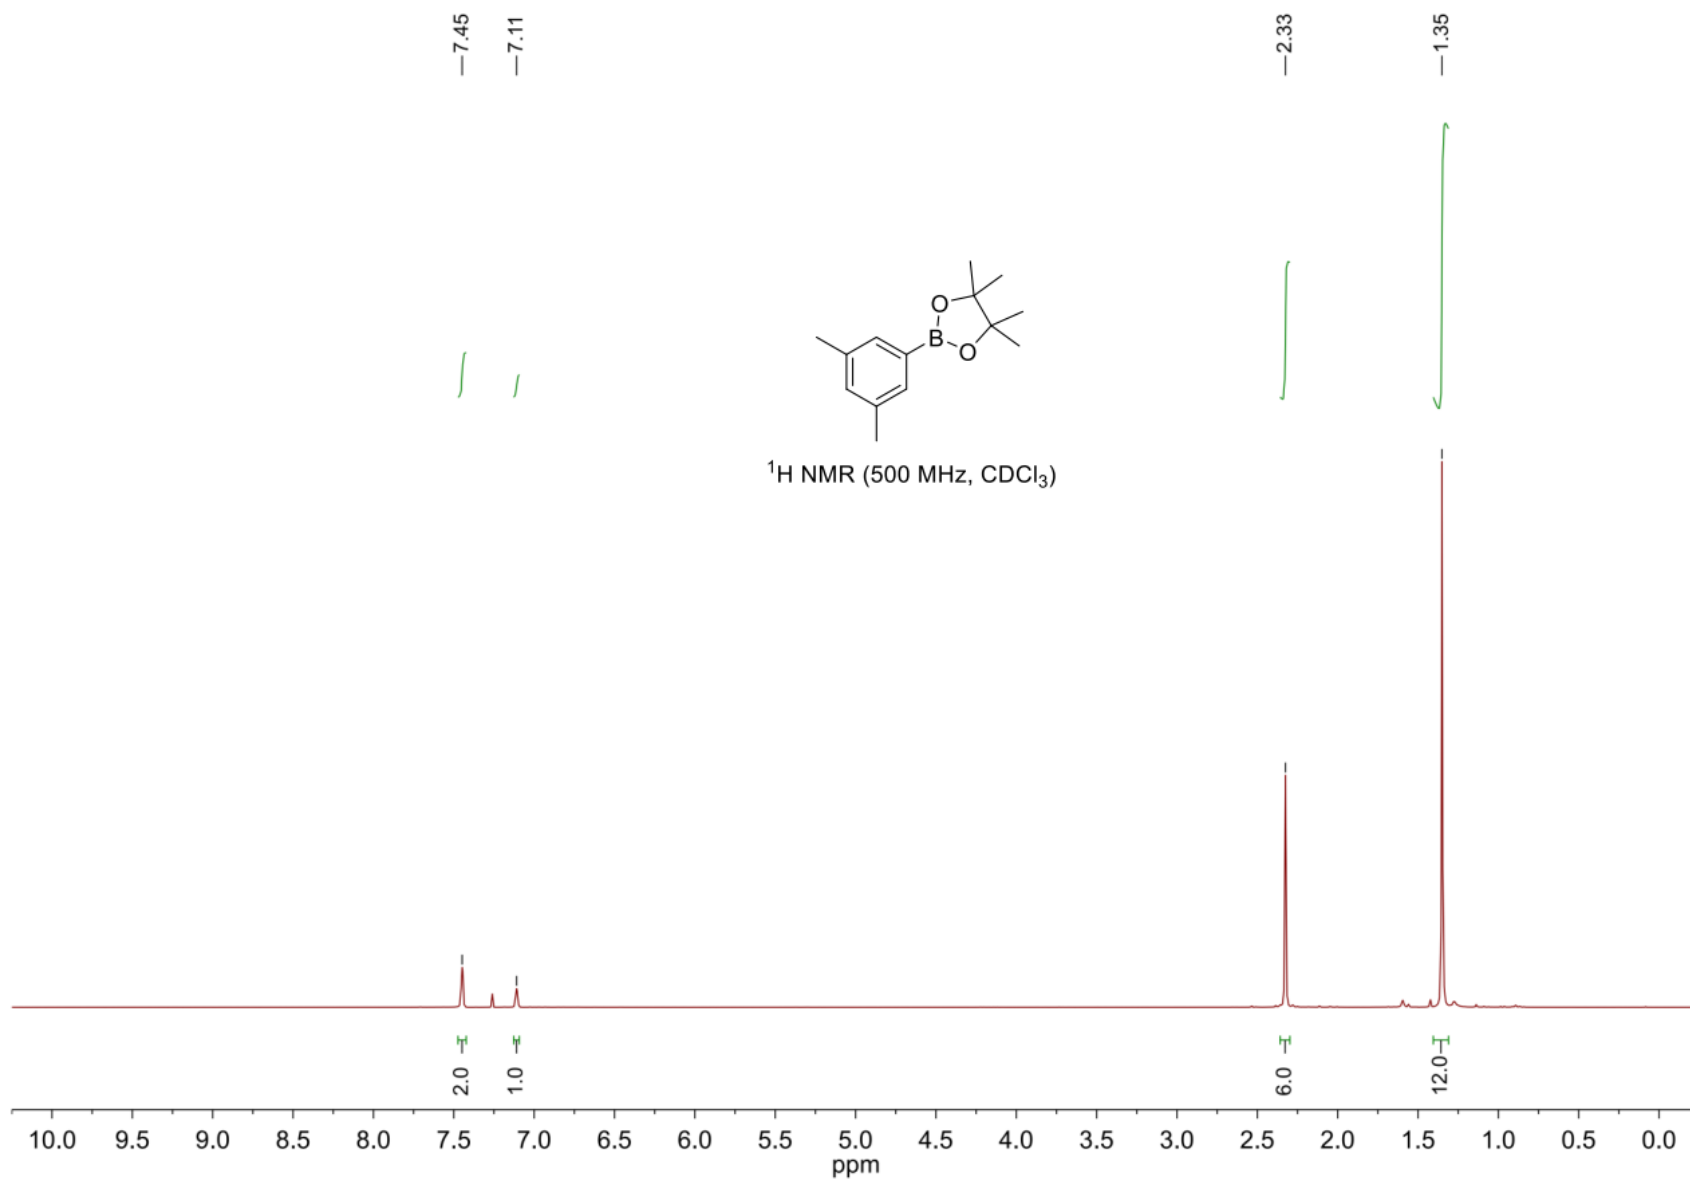

# 2-(3,5-Dimethylphenyl)-4,4,5,5-tetramethyl-1,3,2-dioxaborolane (38)

137.3  
133.1  
132.5

83.8

25.0  
21.3

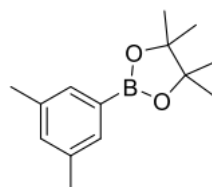

<sup>13</sup>C NMR (125 MHz, CDCl<sub>3</sub>)

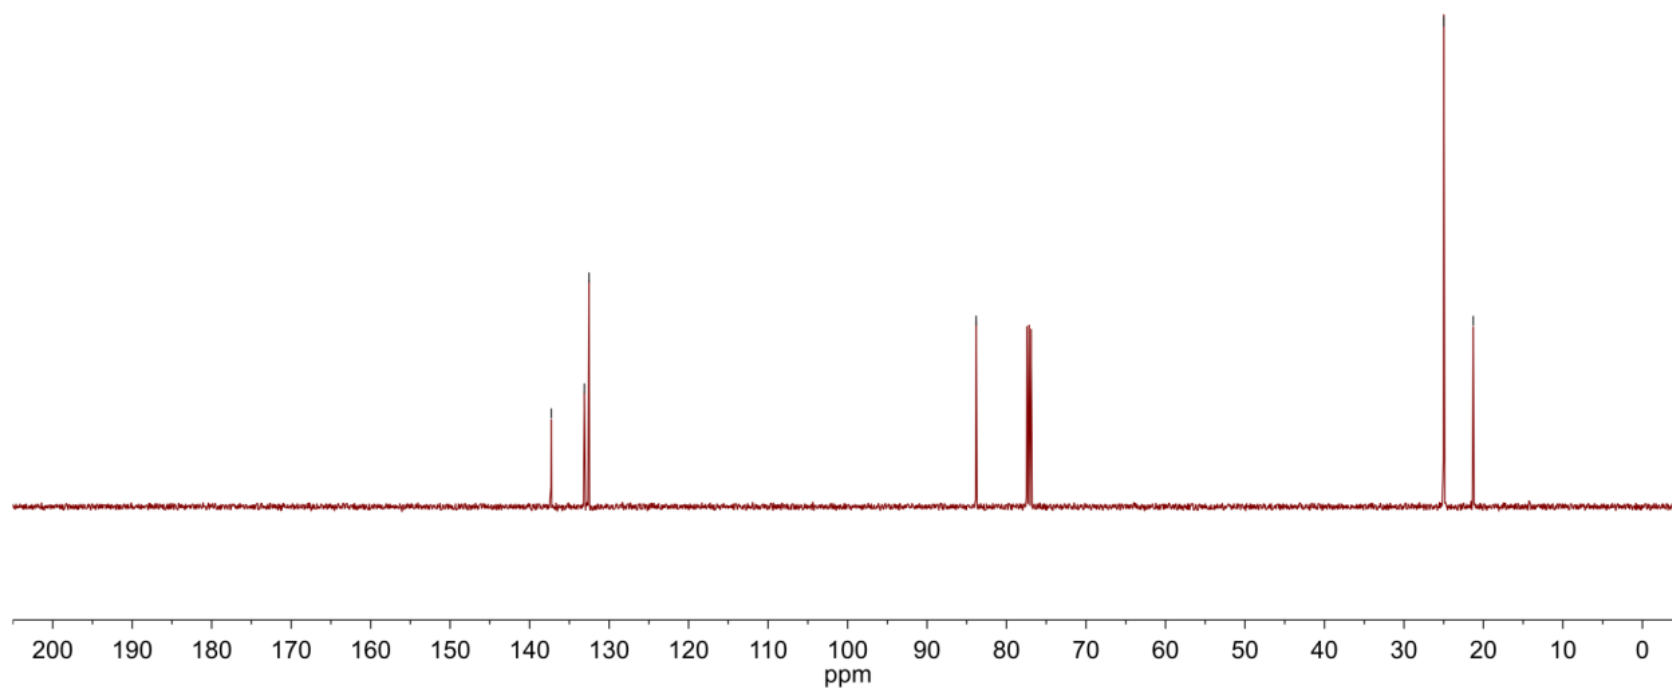

S350

2-(4-(Difluoromethoxy)phenyl)-4,4,5,5-tetramethyl-1,3,2-dioxaborolane (39)

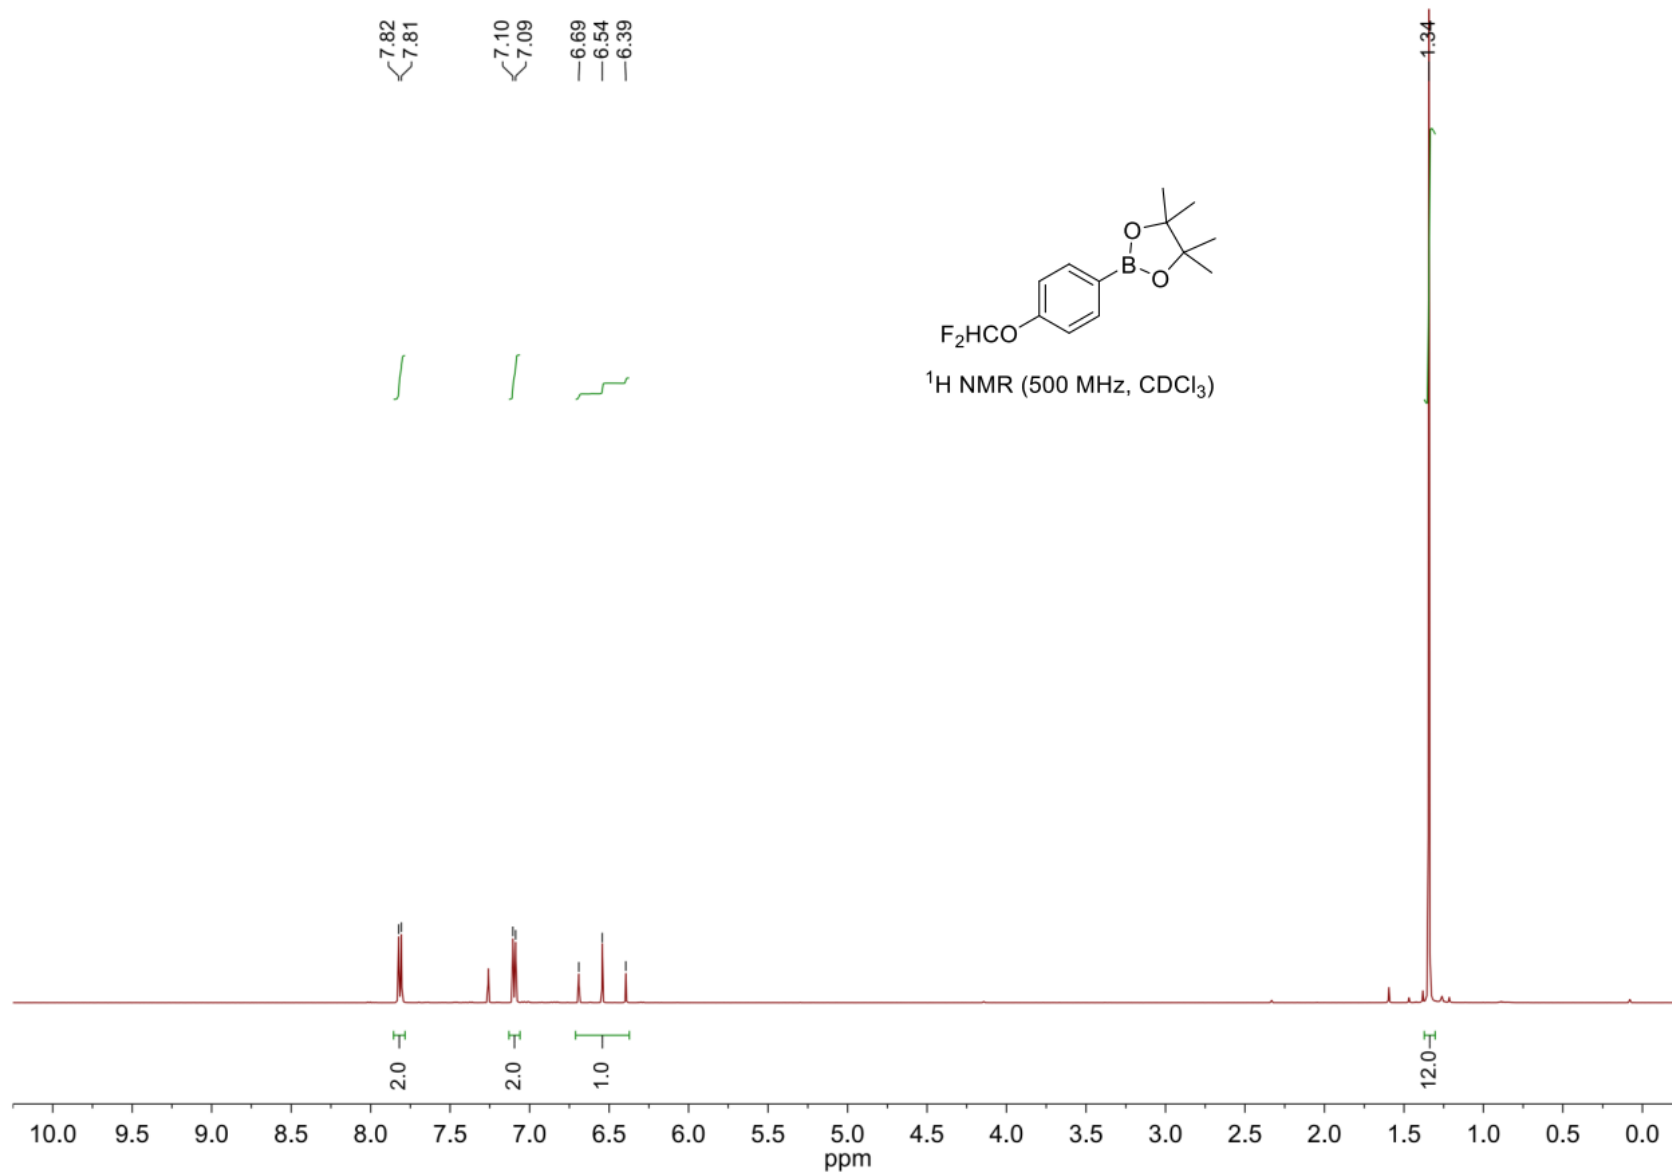

2-(4-(Difluoromethoxy)phenyl)-4,4,5,5-tetramethyl-1,3,2-dioxaborolane (39)

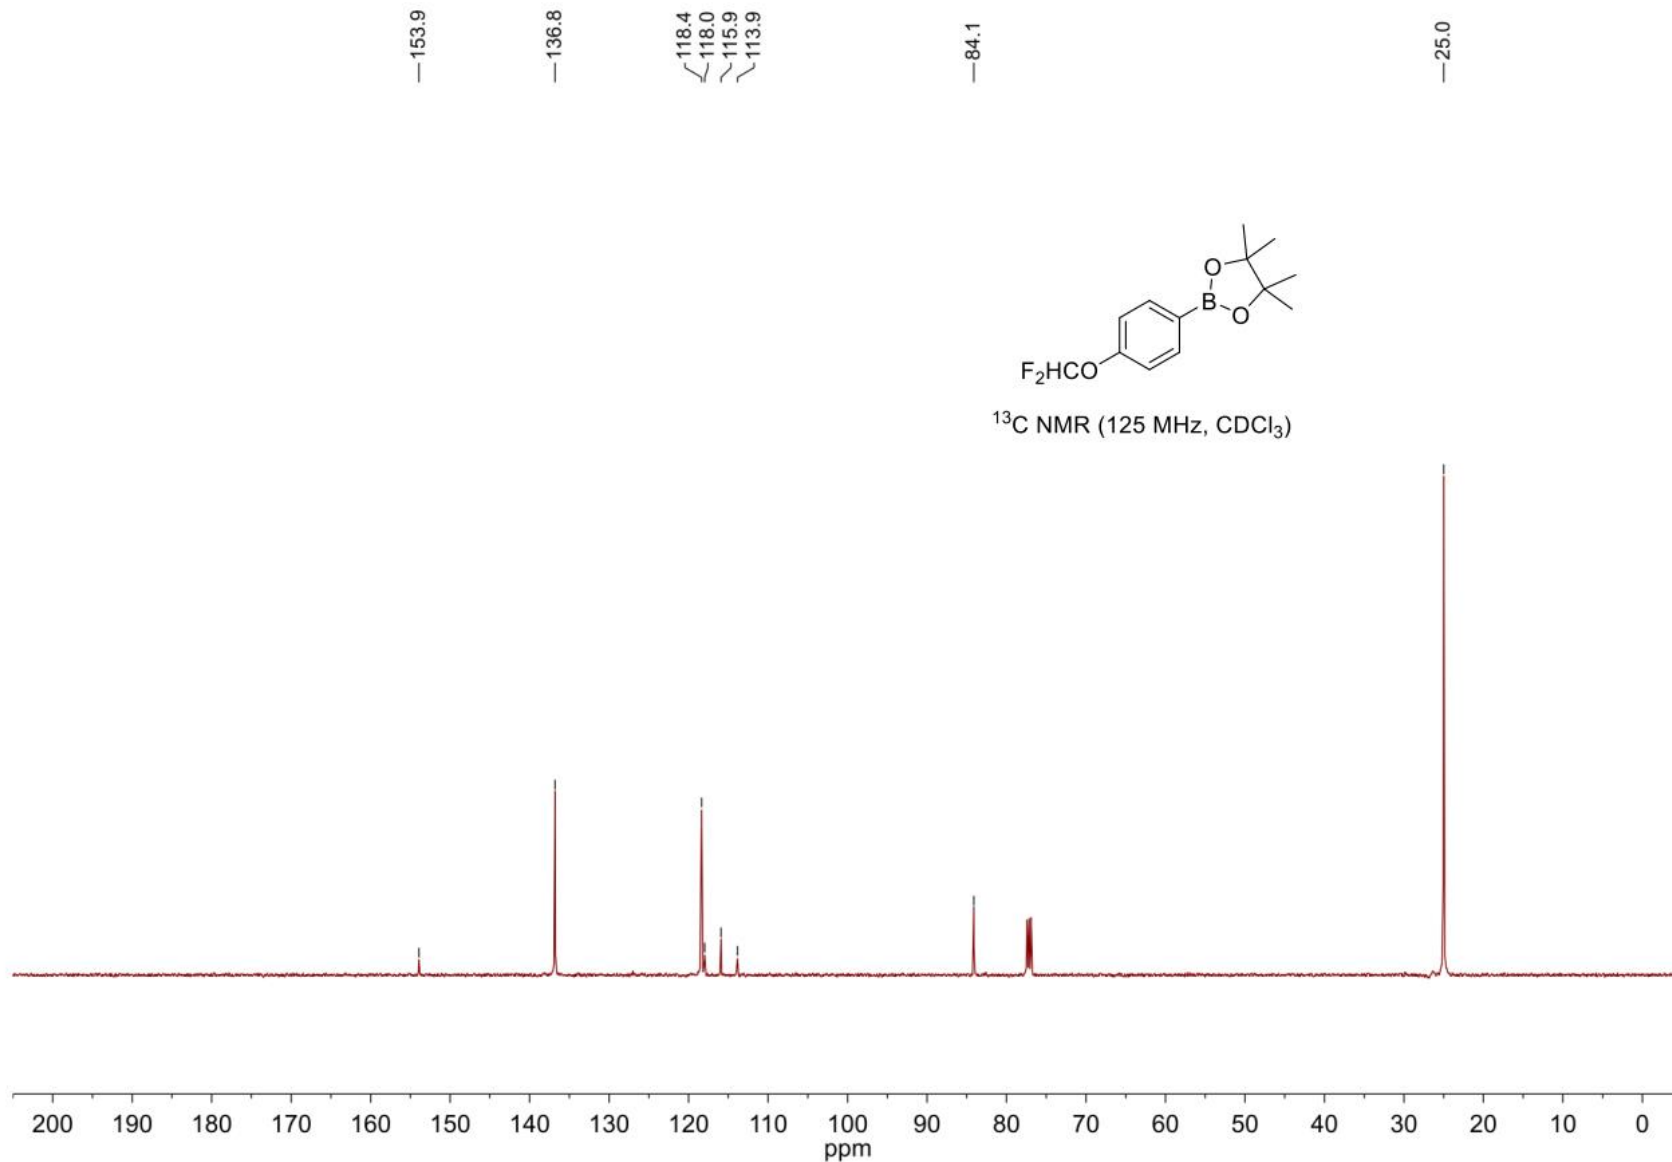



4,4,5,5-Tetramethyl-2-(3-(trifluoromethoxy)phenyl)-1,3,2-dioxaborolane (40)

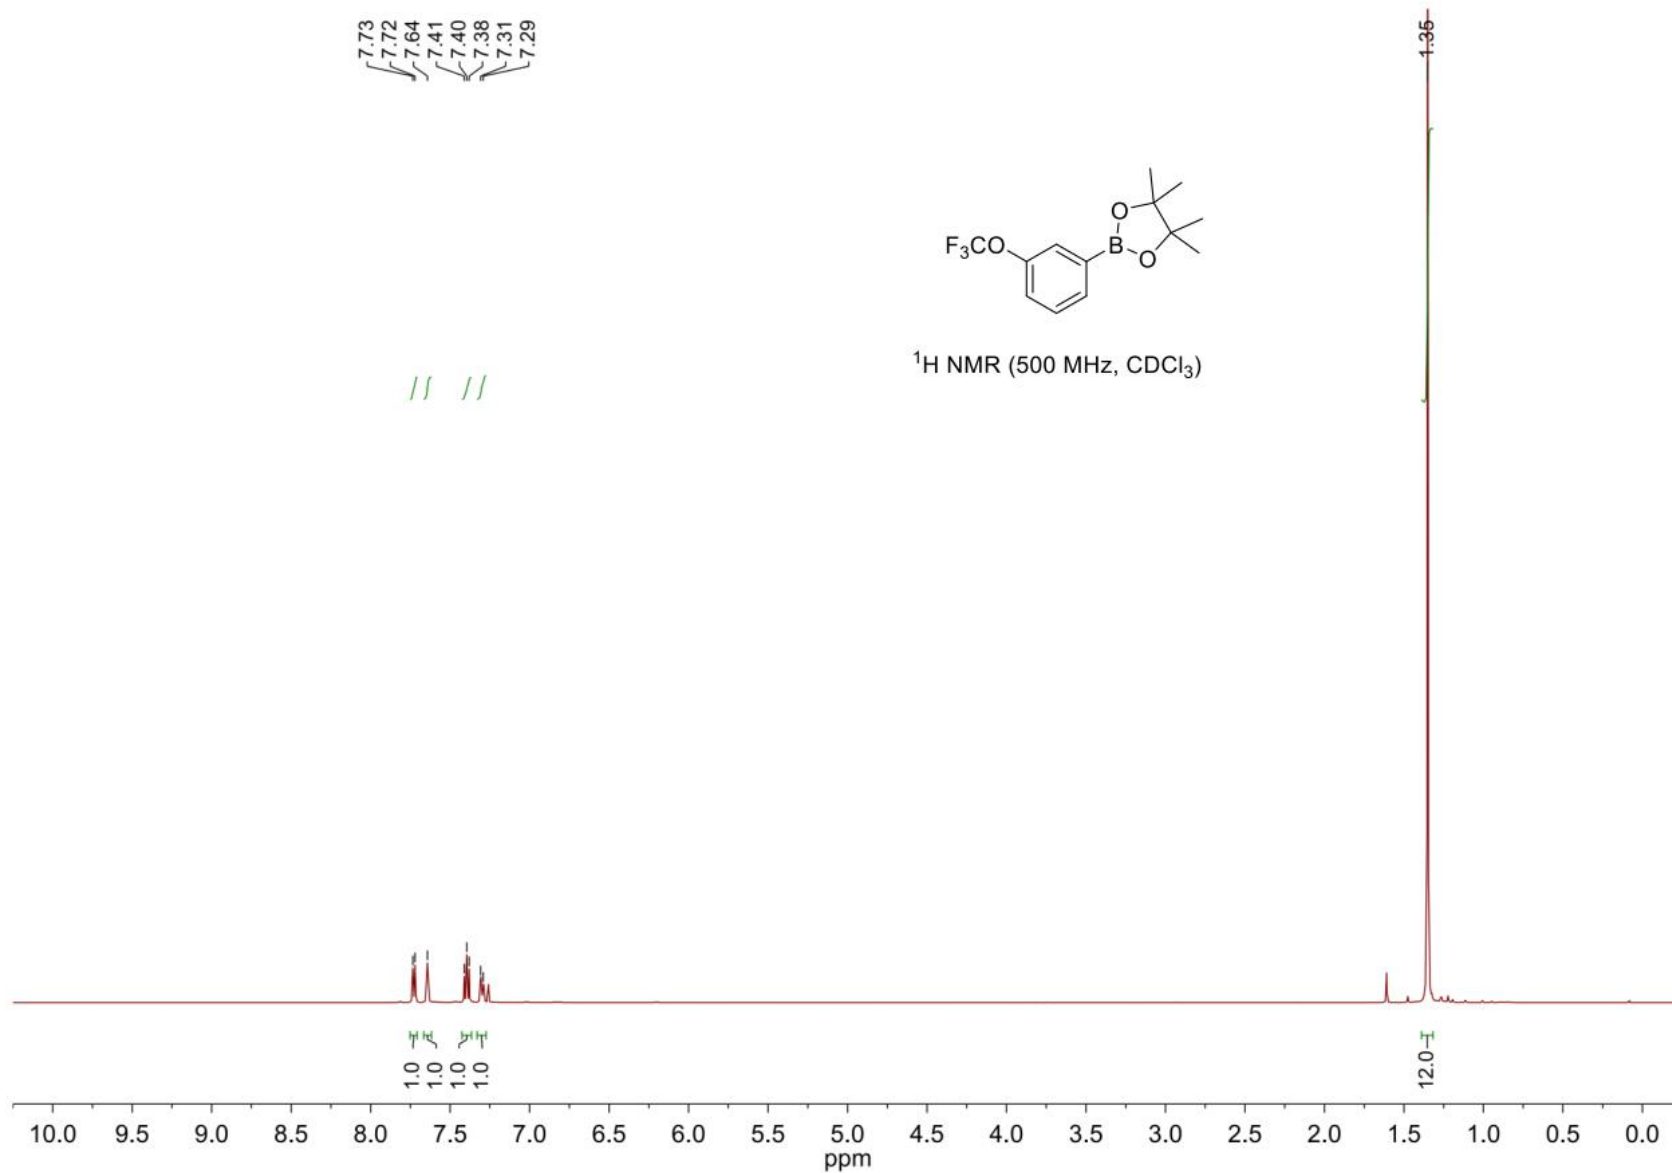

S353

# 4,4,5,5-Tetramethyl-2-(3-(trifluoromethoxy)phenyl)-1,3,2-dioxaborolane (40)

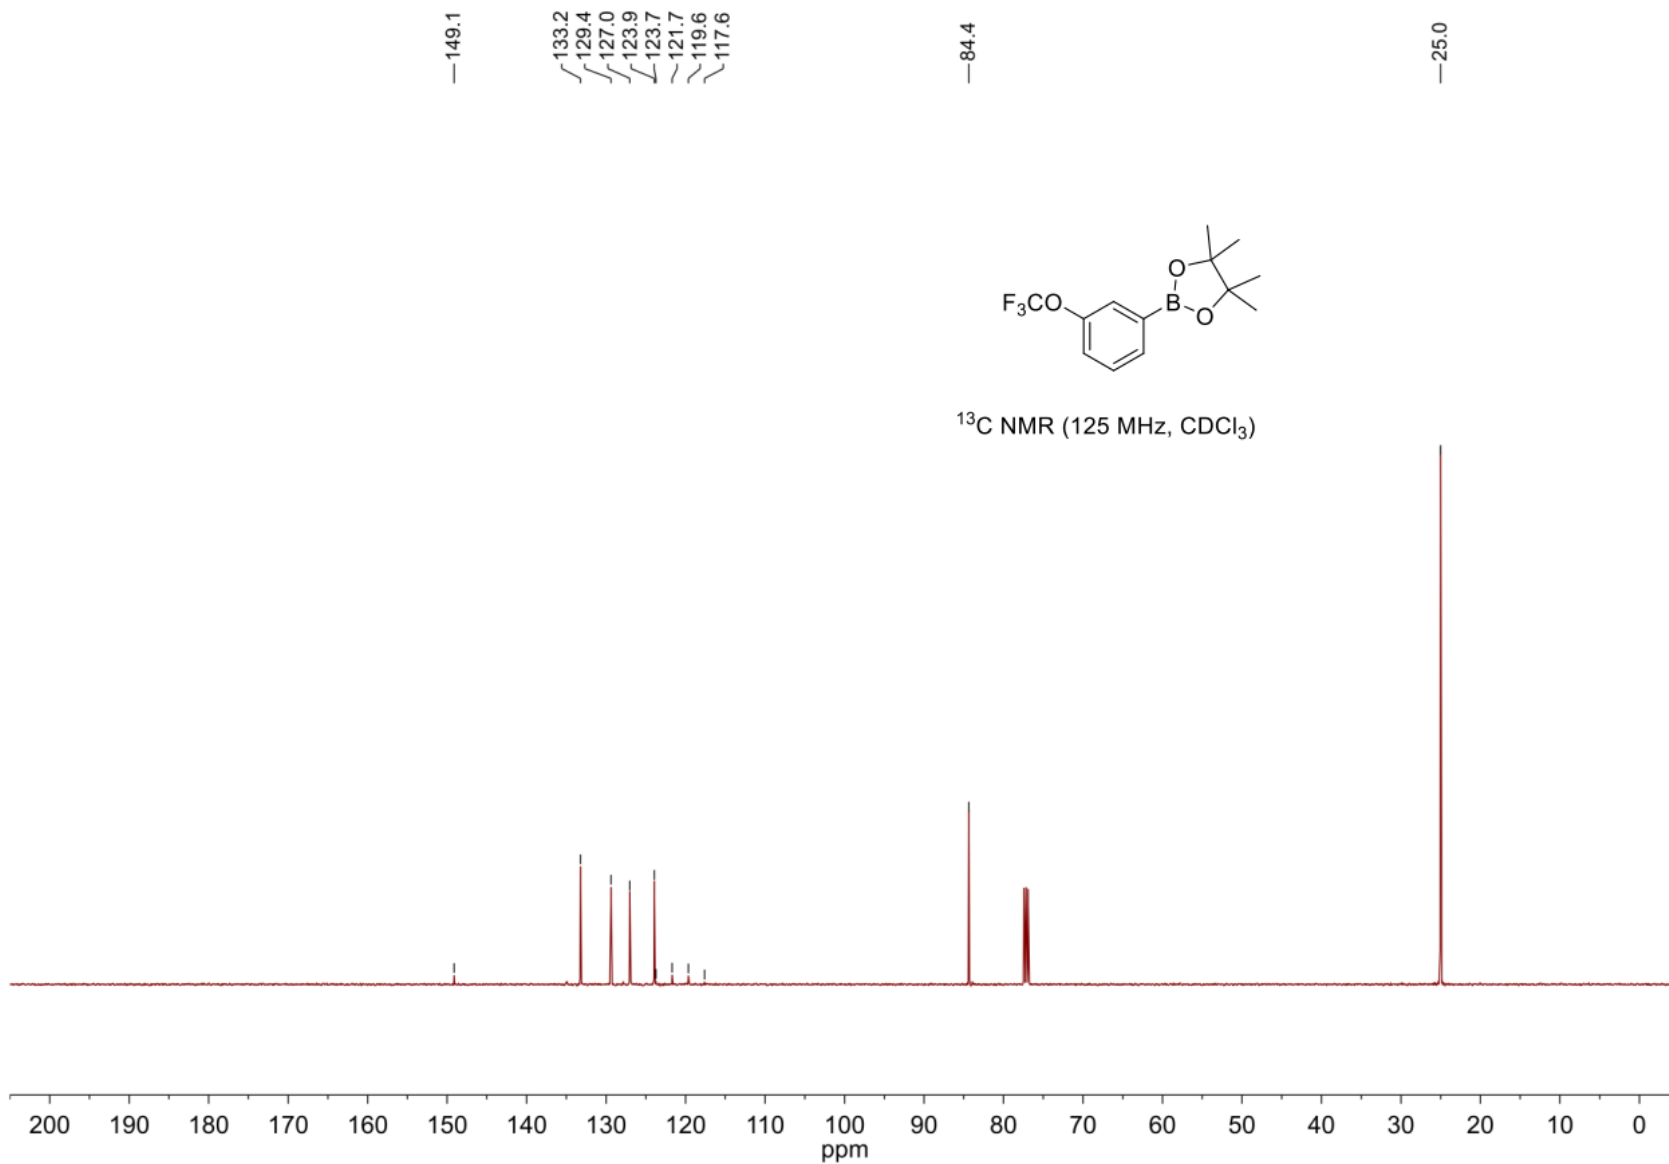

4,4,5,5-Tetramethyl-2-(3-(trifluoromethyl)phenyl)-1,3,2-dioxaborolane (41)

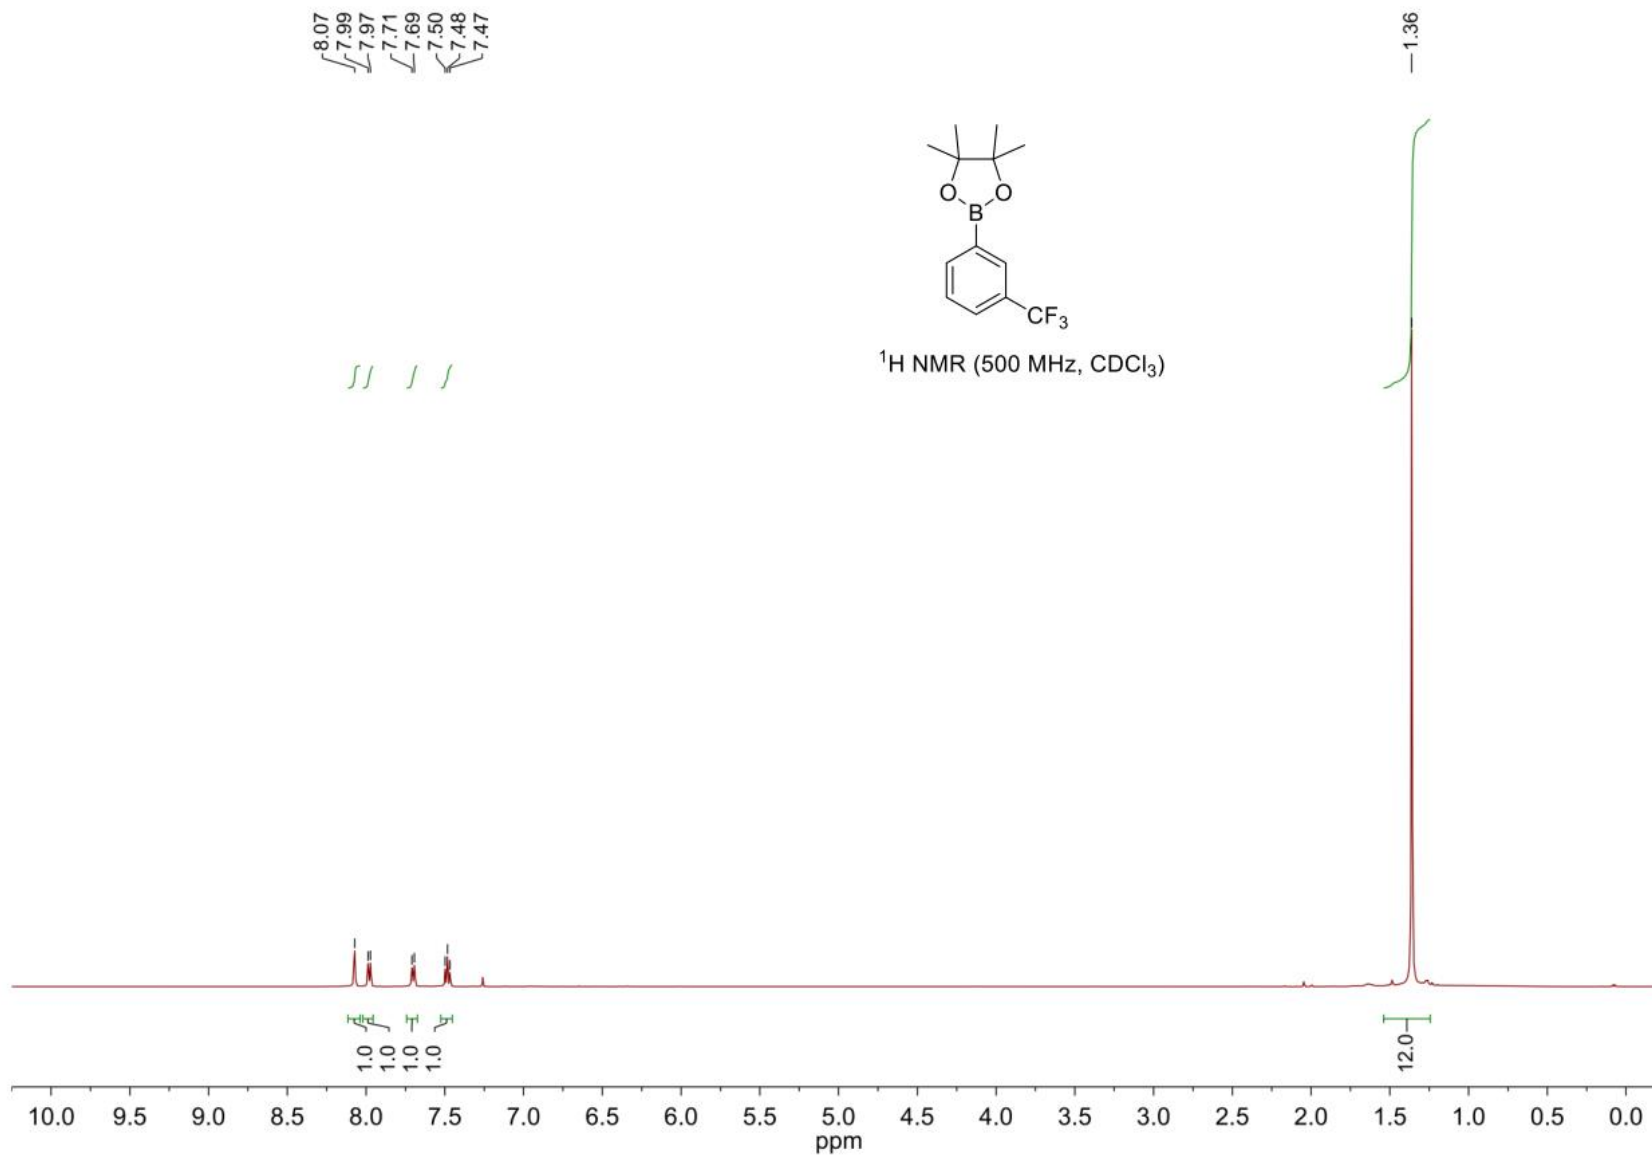

S355

# 4,4,5,5-Tetramethyl-2-(3-(trifluoromethyl)phenyl)-1,3,2-dioxaborolane (41)

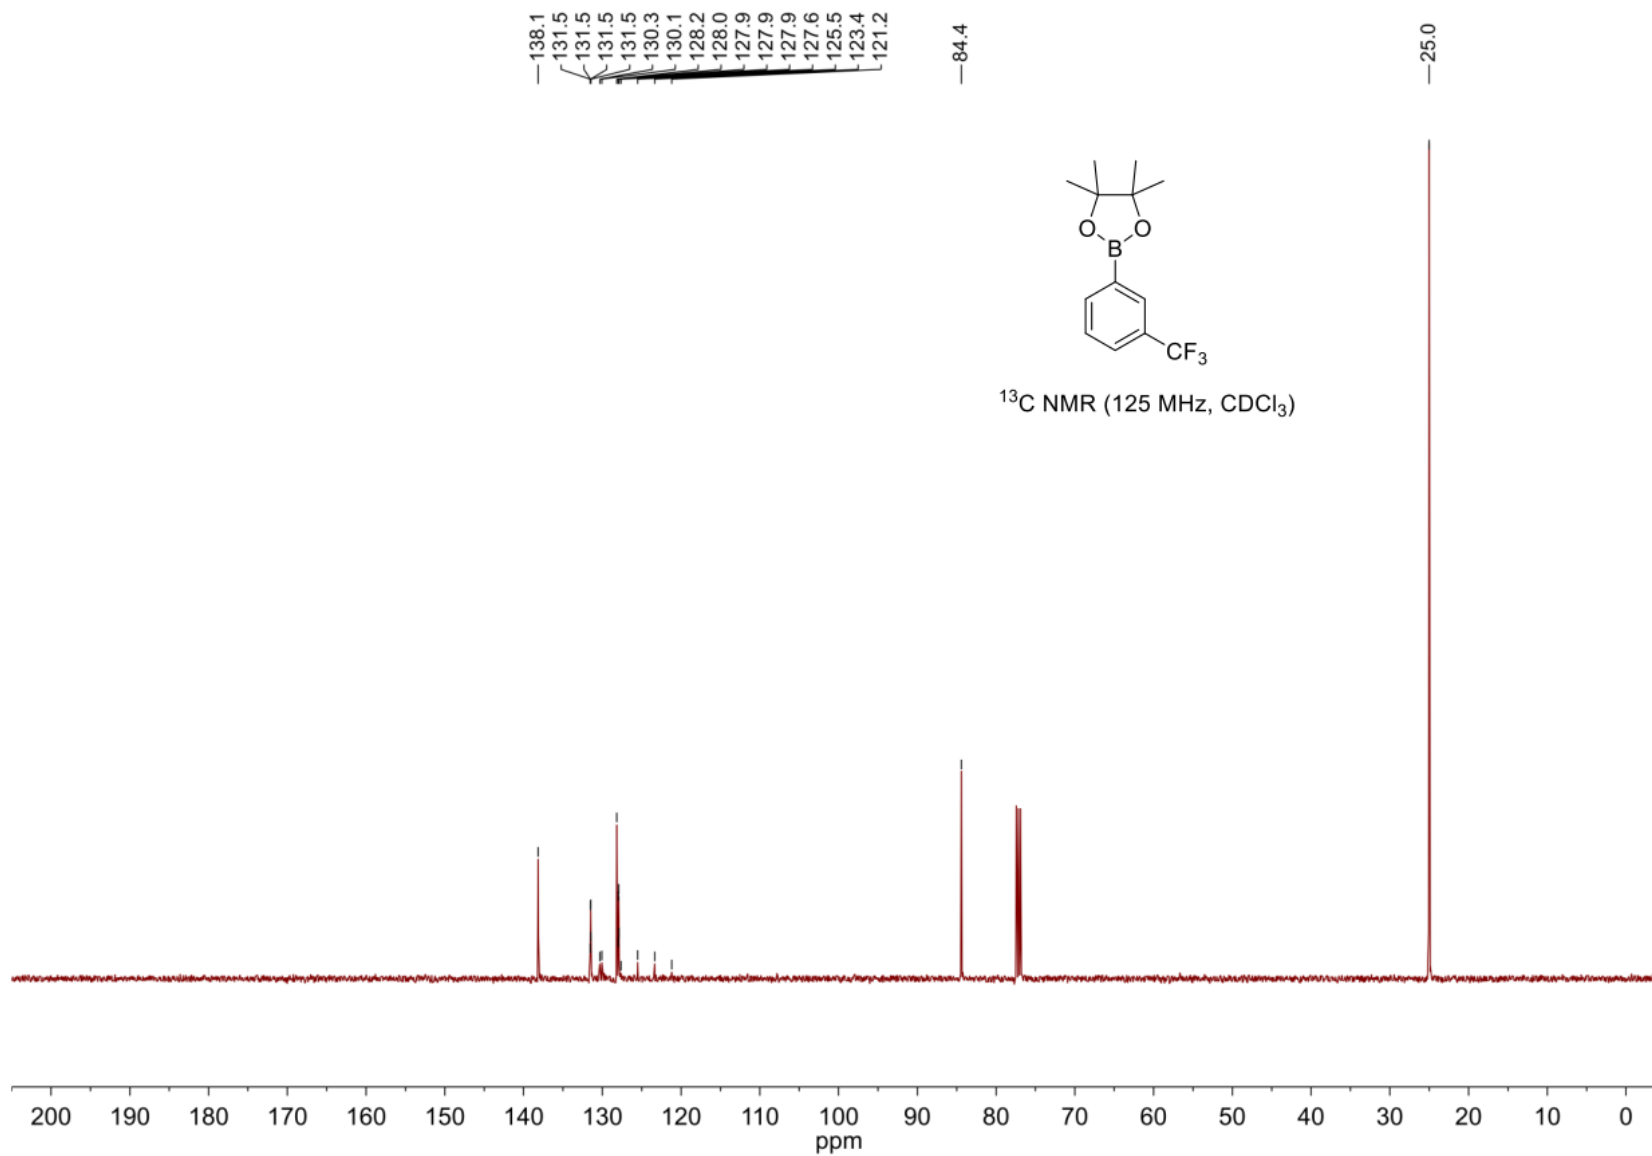

Methyl 4-(4,4,5,5-tetramethyl-1,3,2-dioxaborolan-2-yl)benzoate (42)

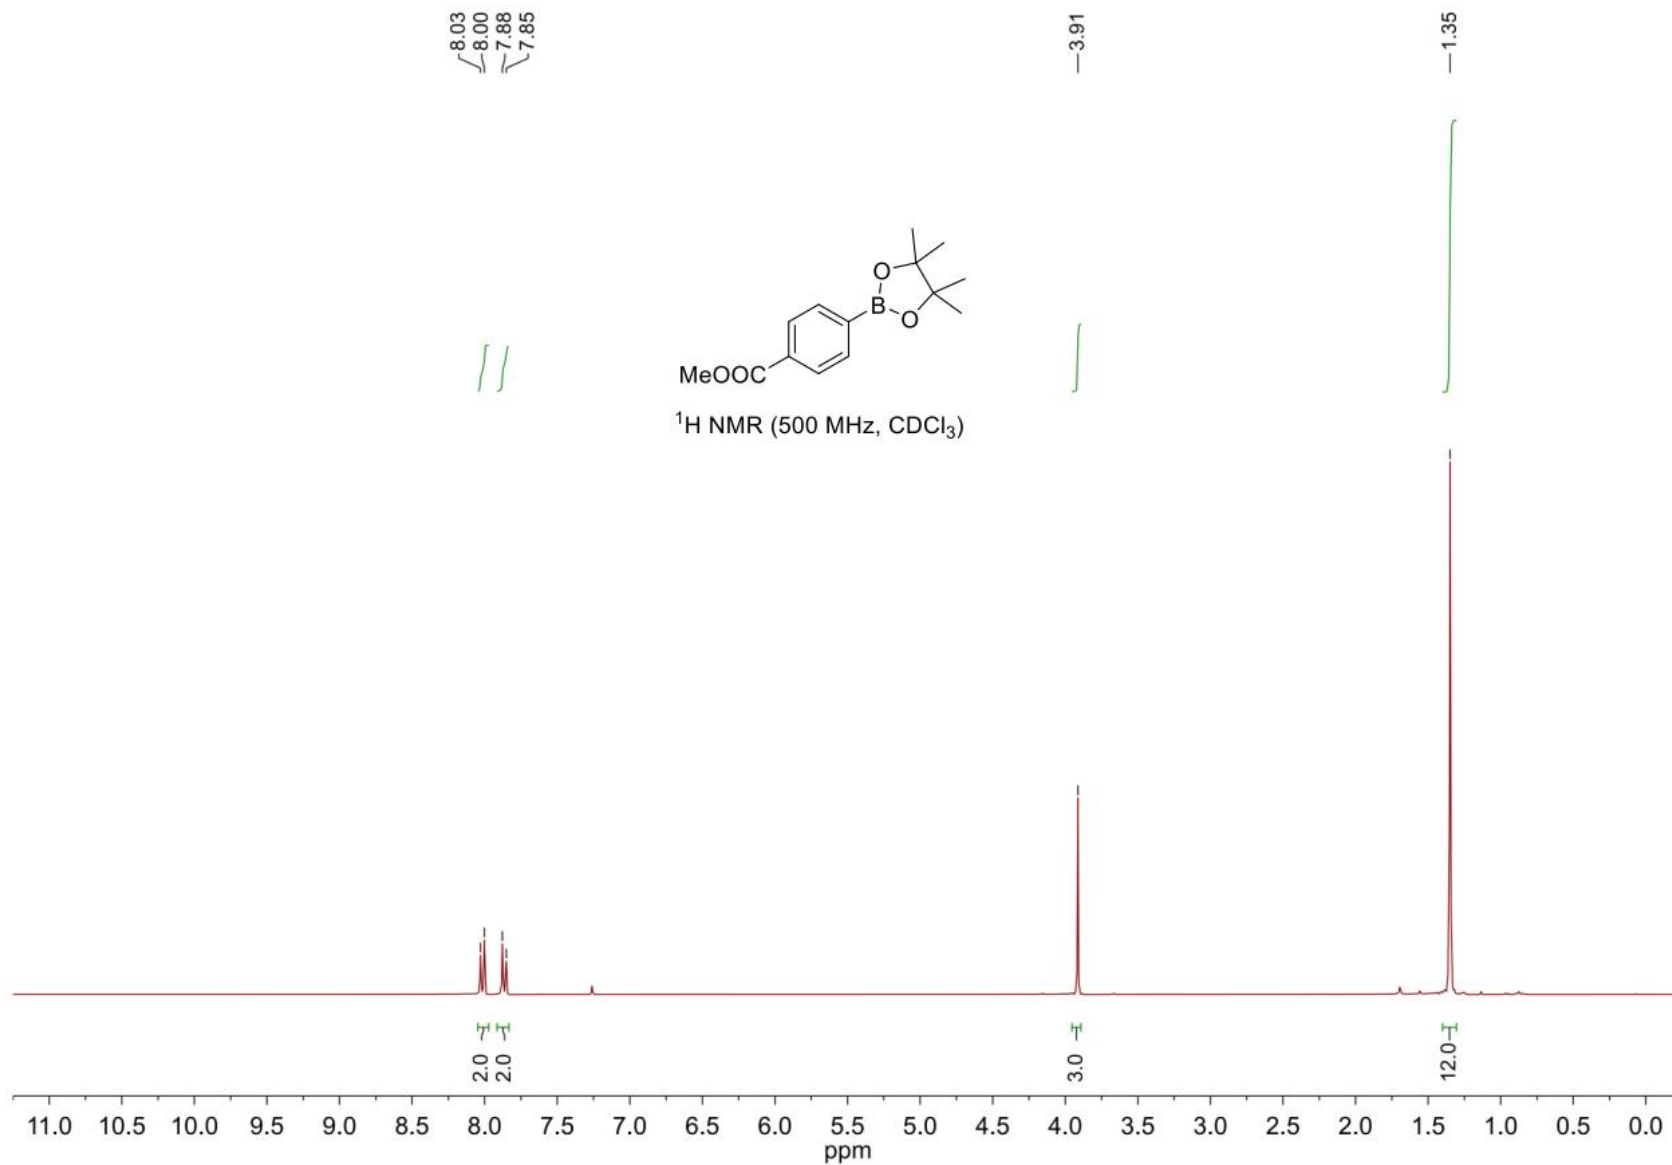

S357

# Methyl 4-(4,4,5,5-tetramethyl-1,3,2-dioxaborolan-2-yl)benzoate (42)

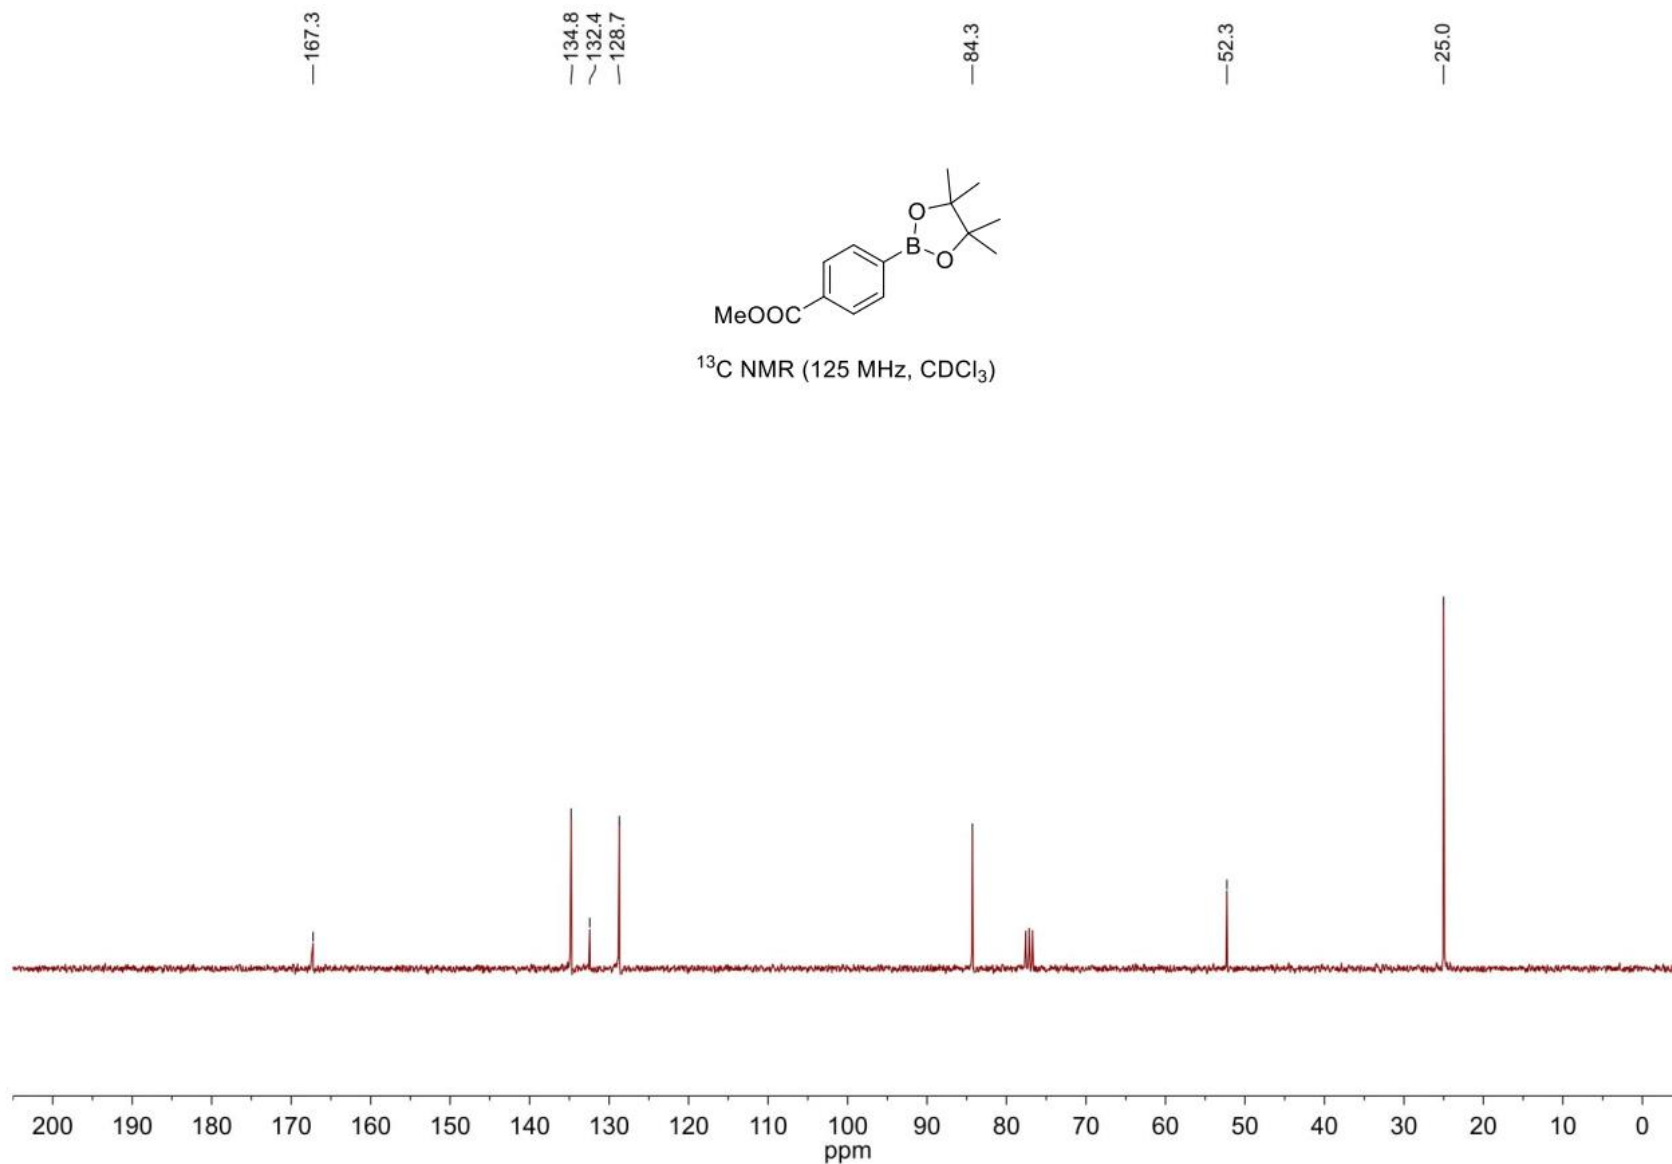

S358

Trifluoro(3-(methylsulfonyl)phenyl)- $\lambda^4$ -borane, potassium salt (43)

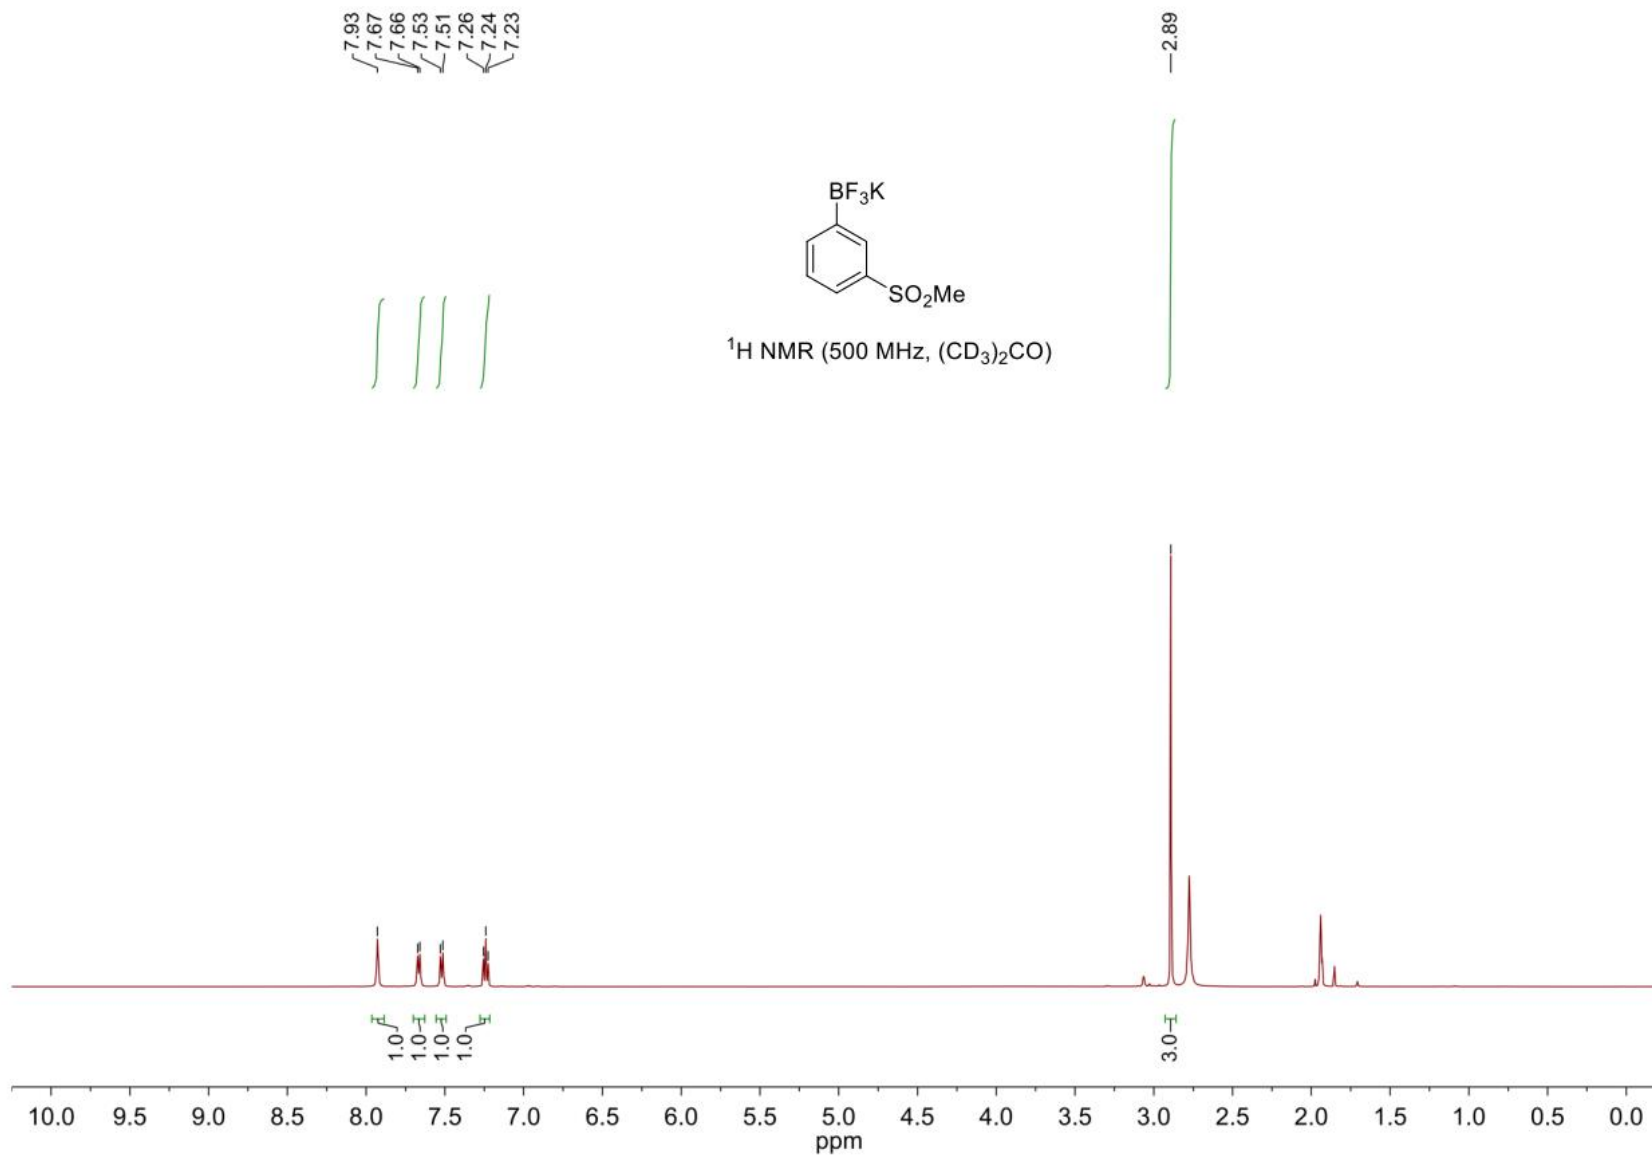

Trifluoro(3-(methylsulfonyl)phenyl)- $\lambda^4$ -borane, potassium salt (43)

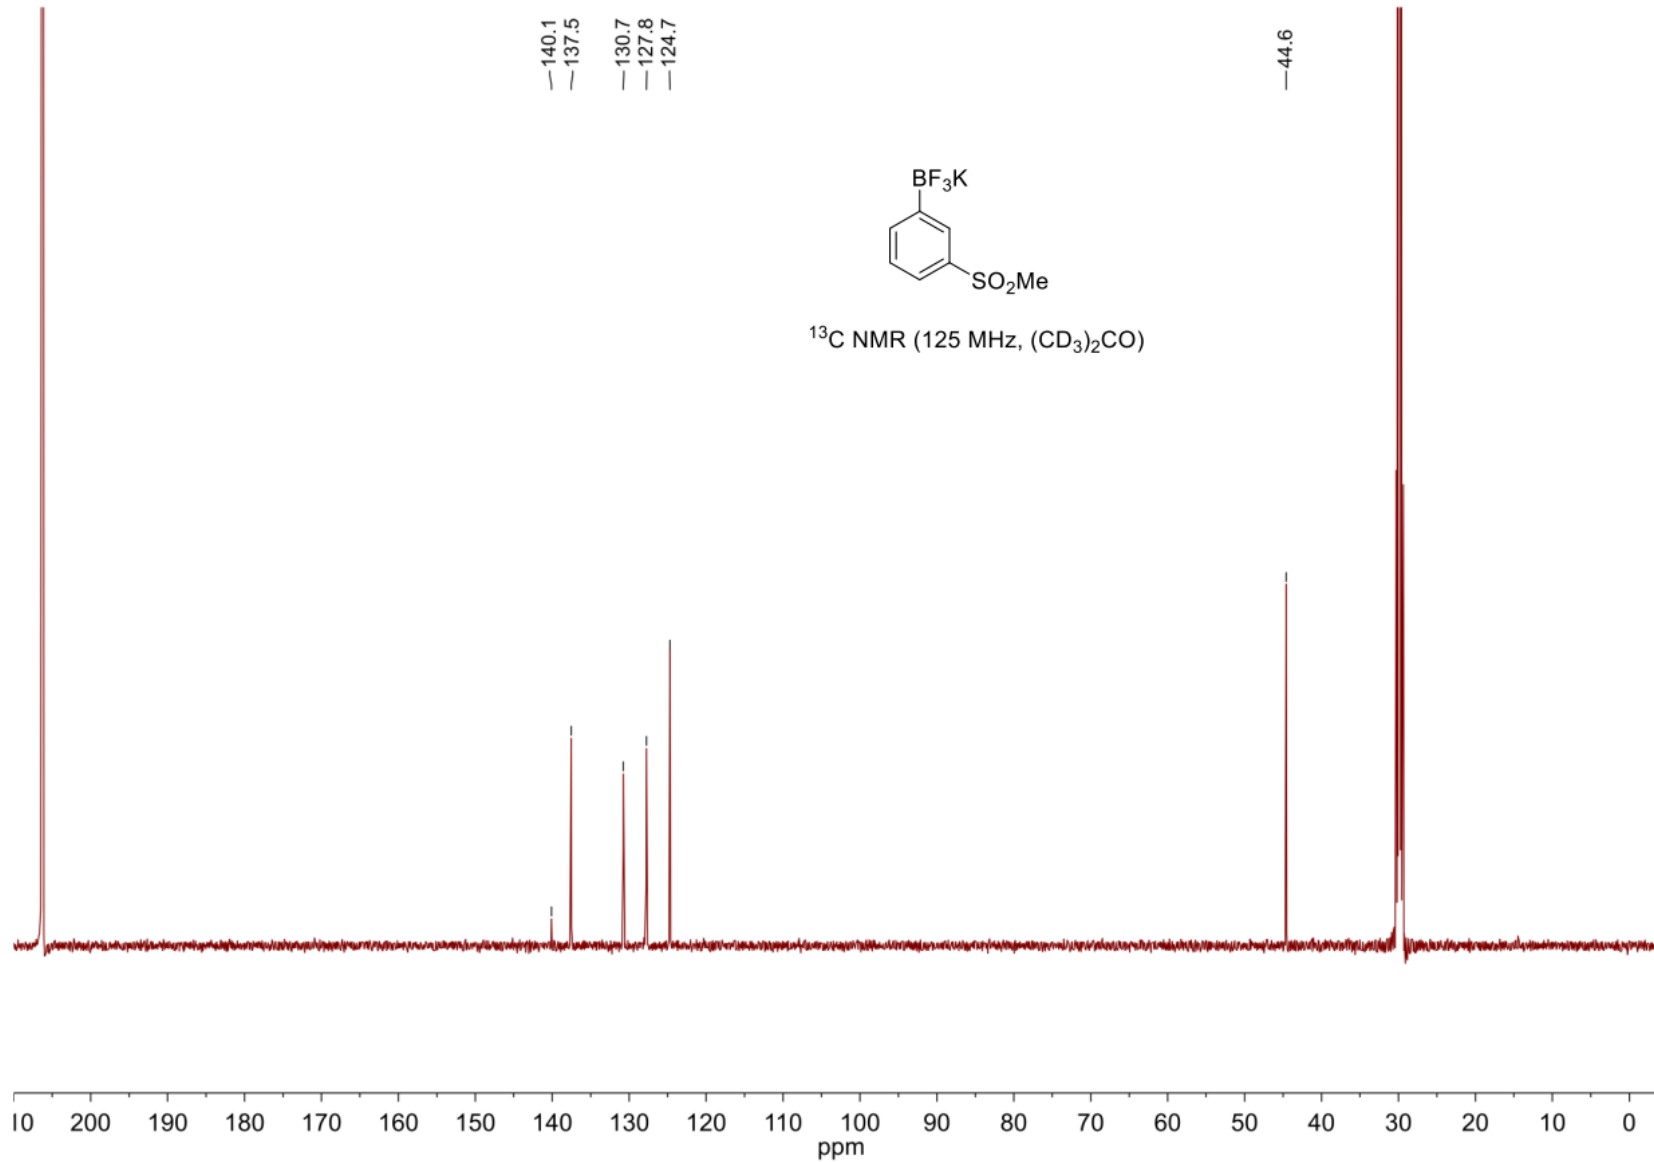

S360



4-(4,4,5,5-Tetramethyl-1,3,2-dioxaborolan-2-yl)-1H-indole (44)

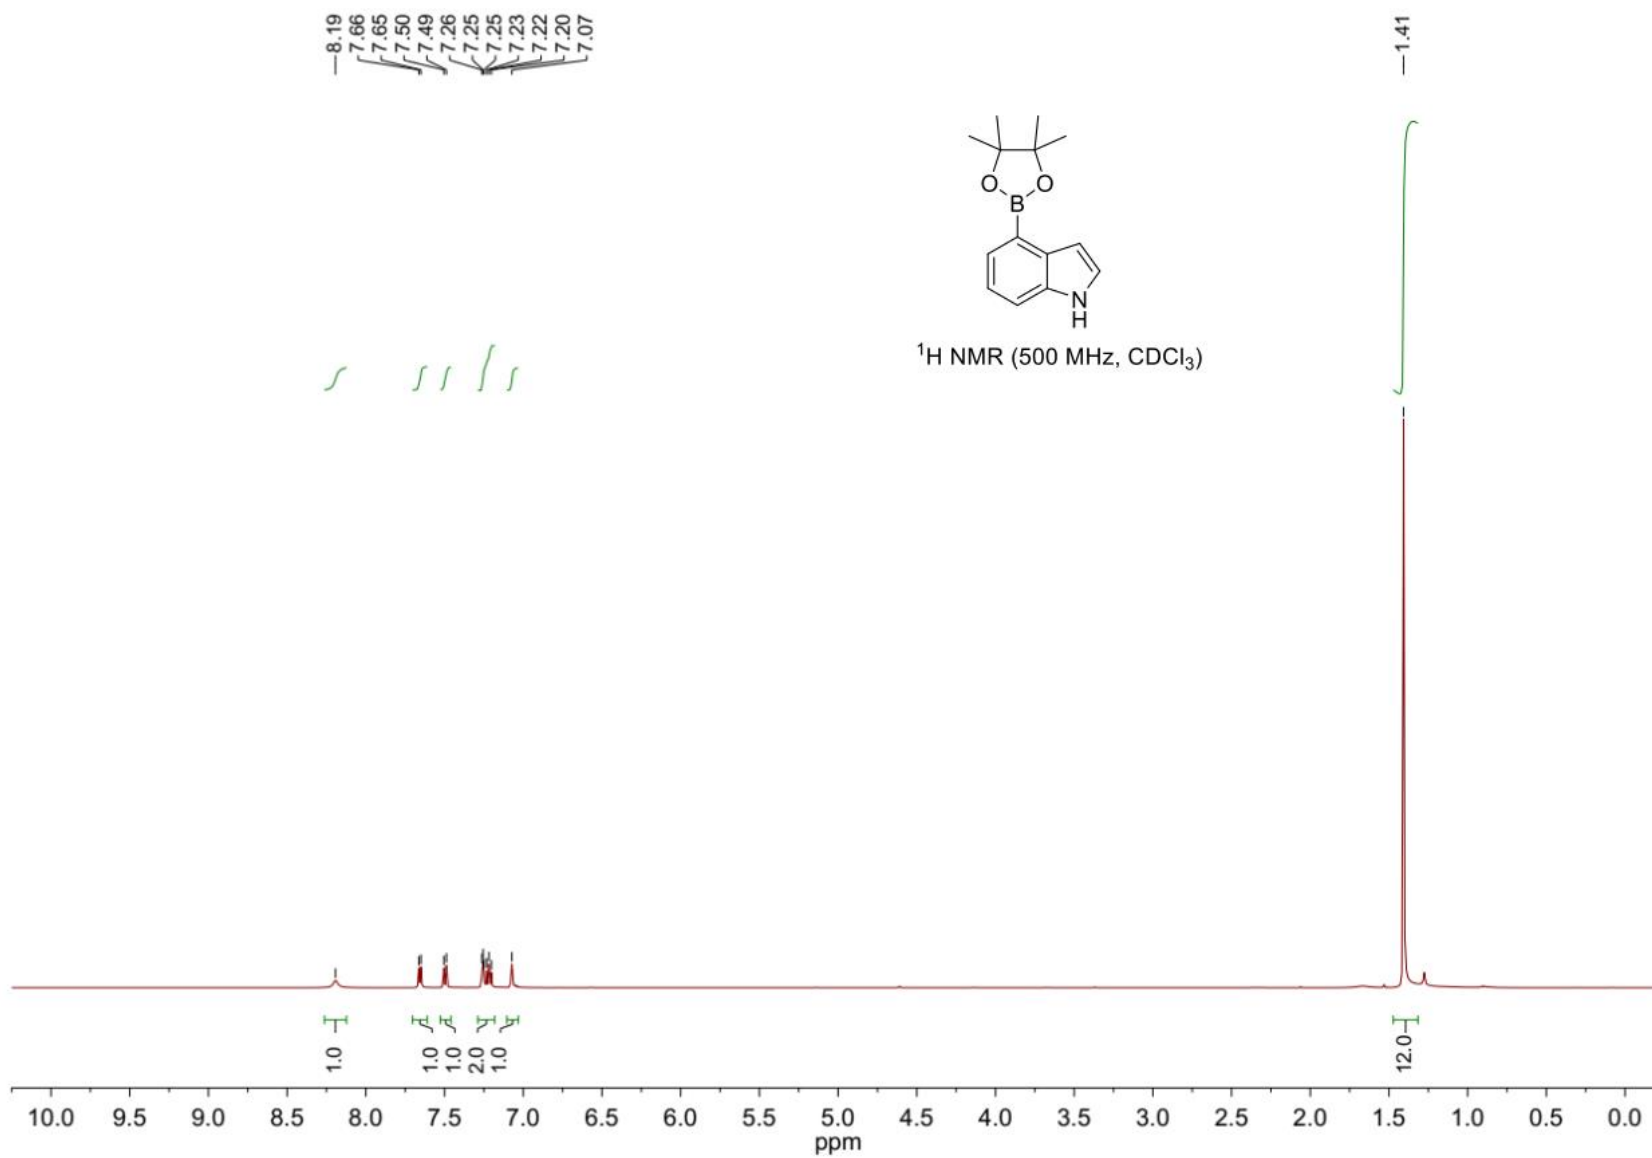

4-(4,4,5,5-Tetramethyl-1,3,2-dioxaborolan-2-yl)-1H-indole (44)

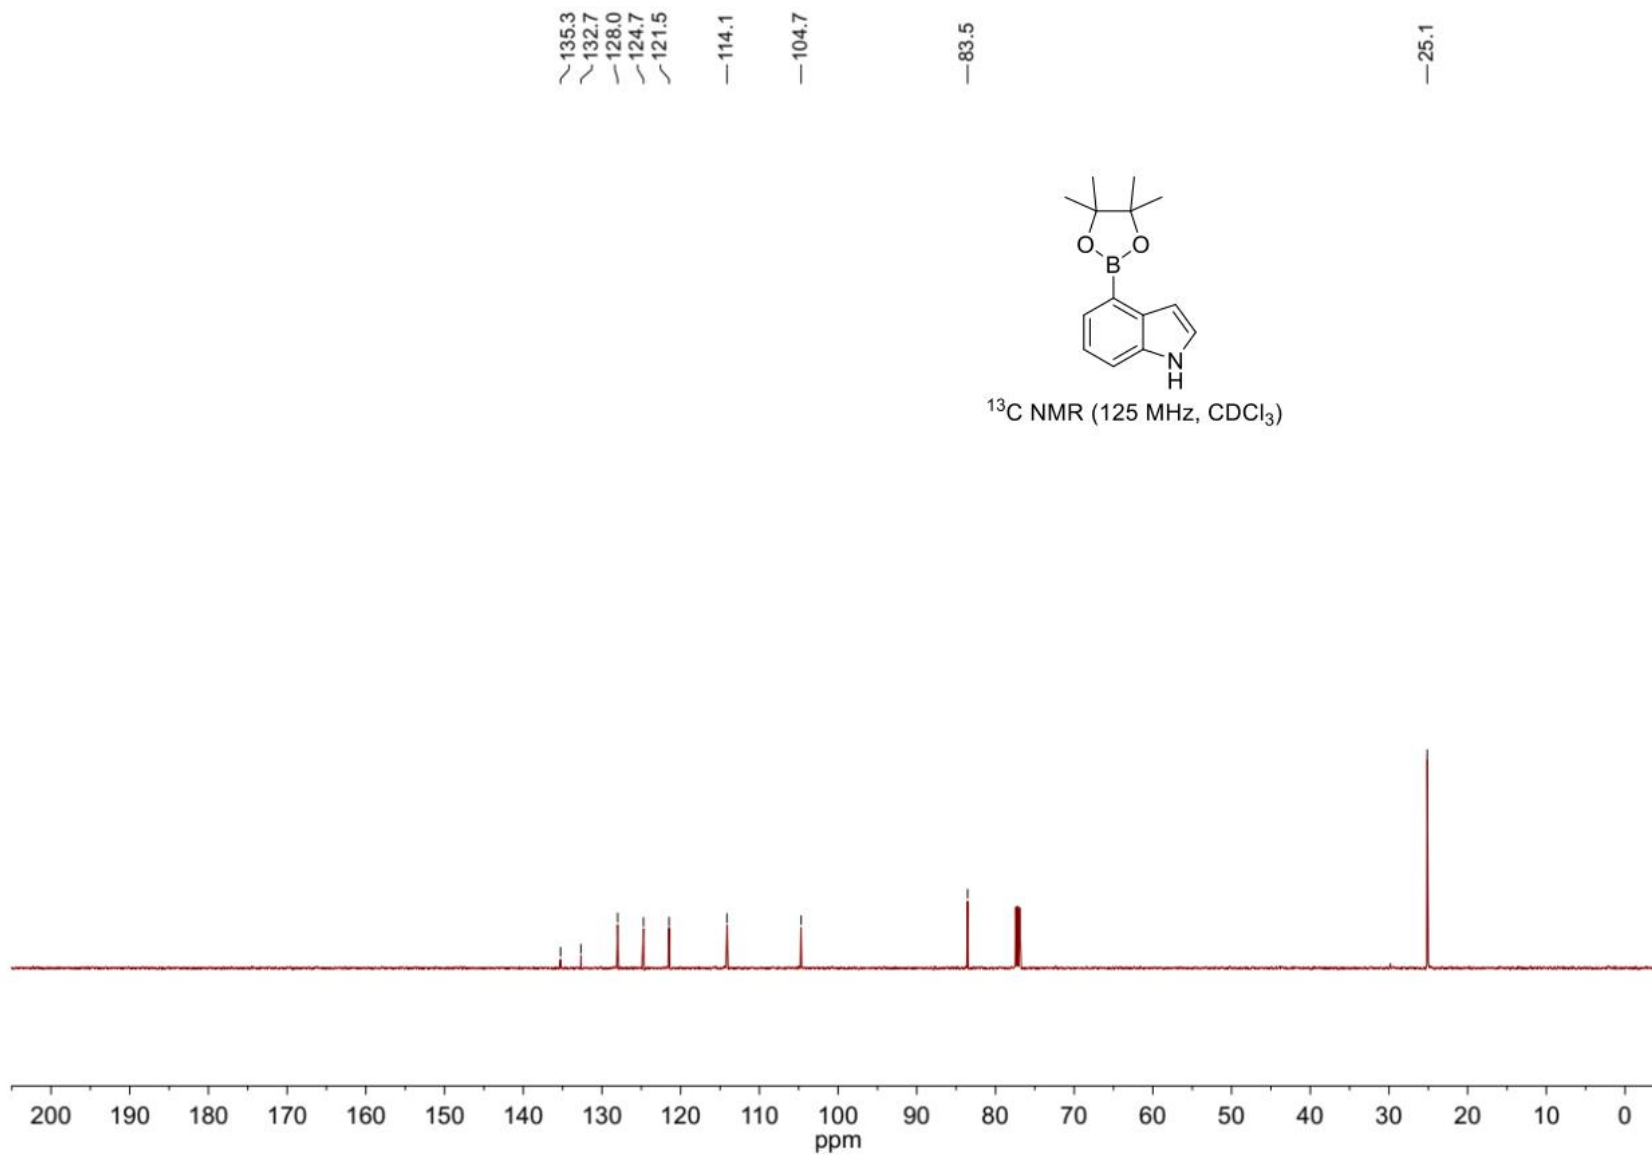

Indolin-1-yl(4-(trifluoro- $\lambda^4$ -boraneyl)phenyl)methanone, potassium salt (45)

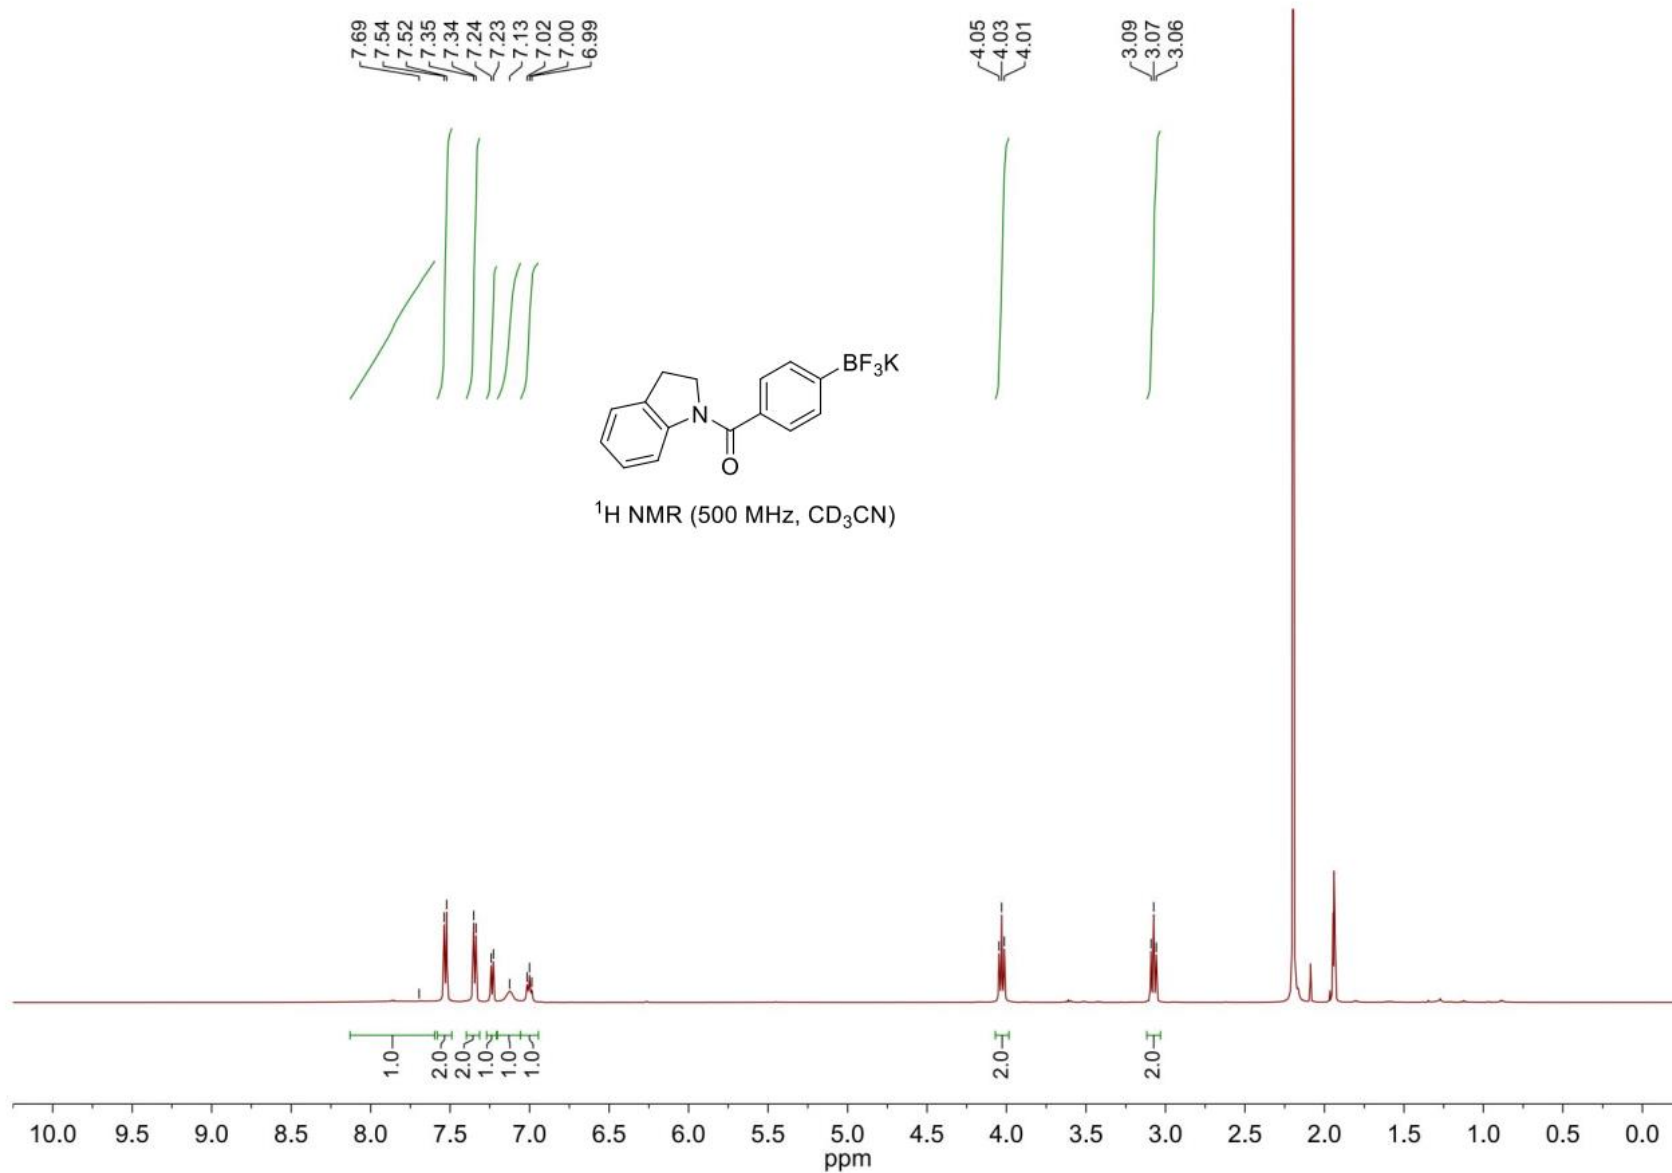

S363

# Indolin-1-yl(4-(trifluoro- $\lambda^4$ -boraneyl)phenyl)methanone, potassium salt (45)

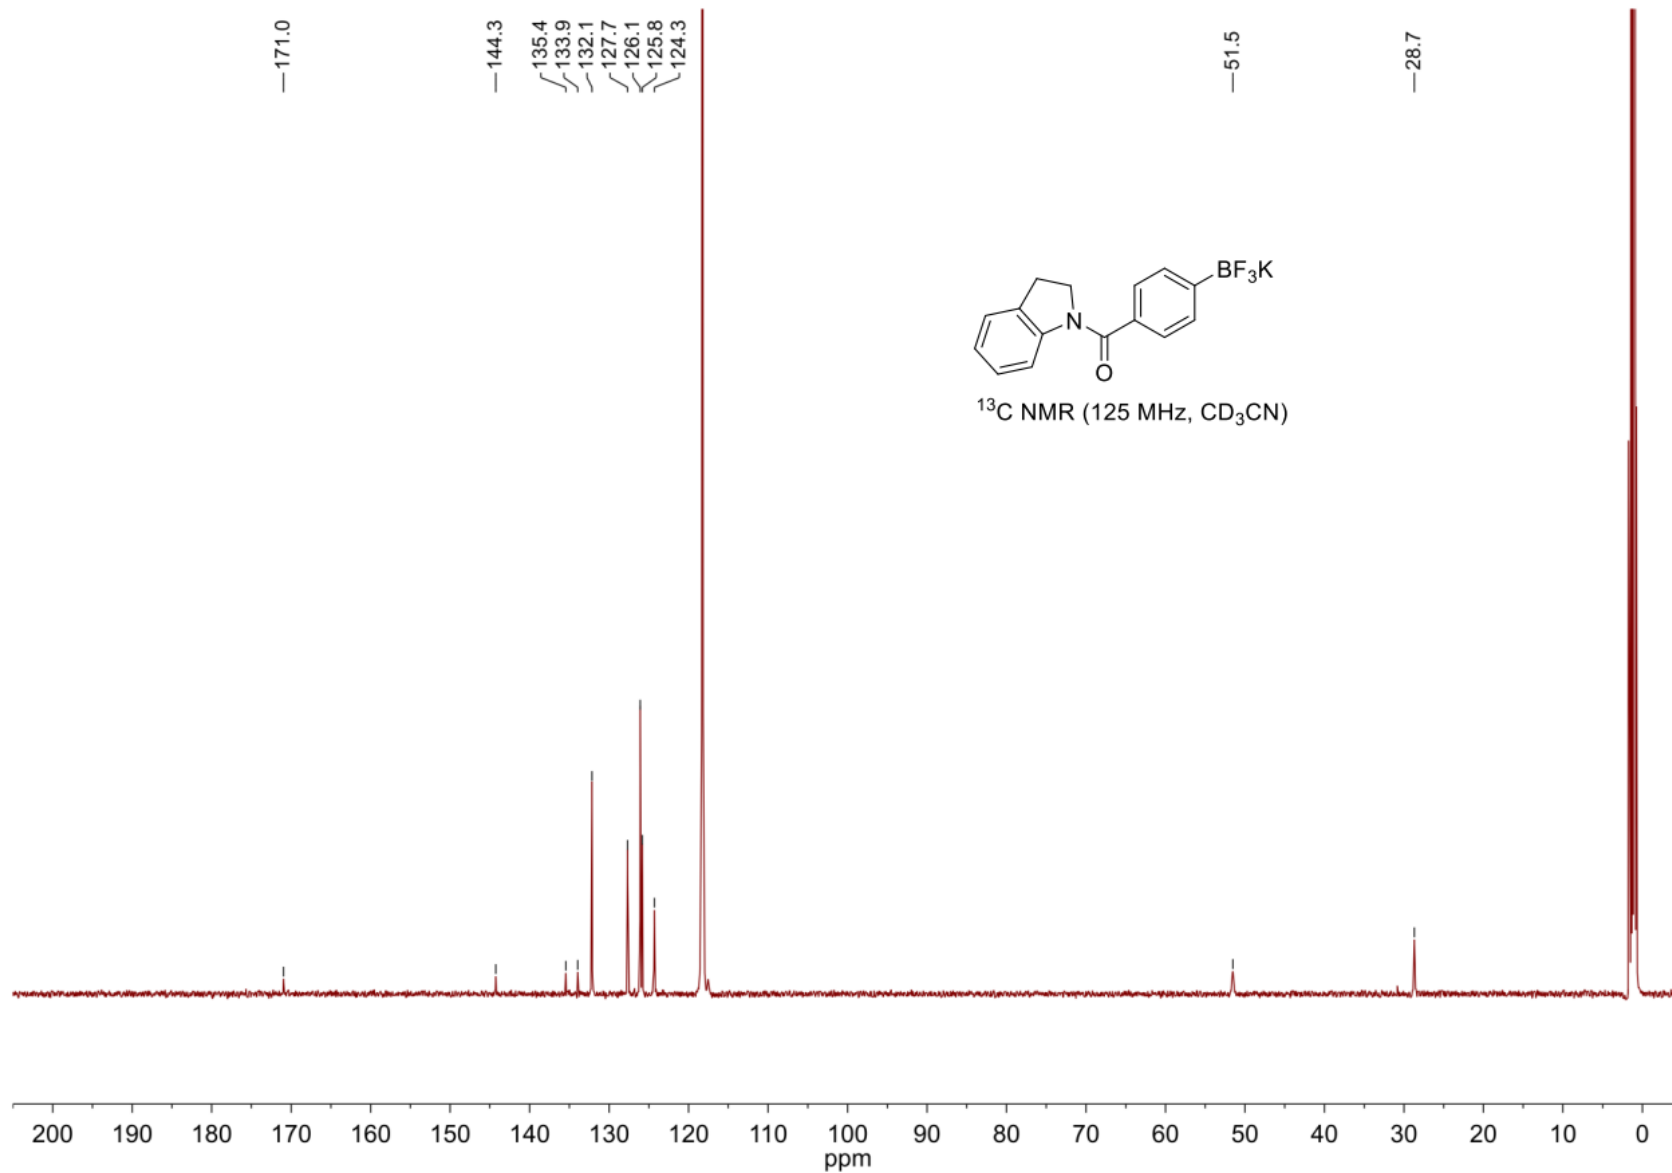

**N-(Thiophen-2-ylmethyl)-4-(trifluoro- $\lambda^4$ -boraneyl)benzamide, potassium salt (46)**

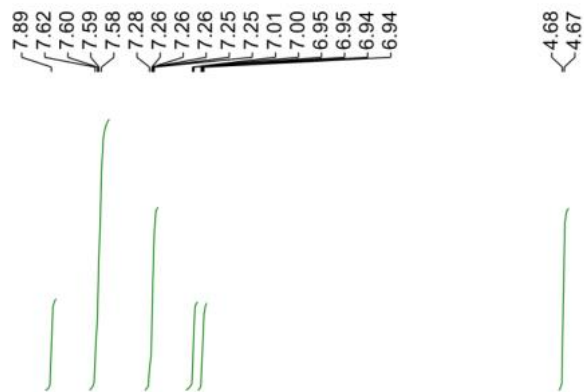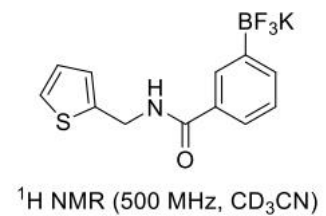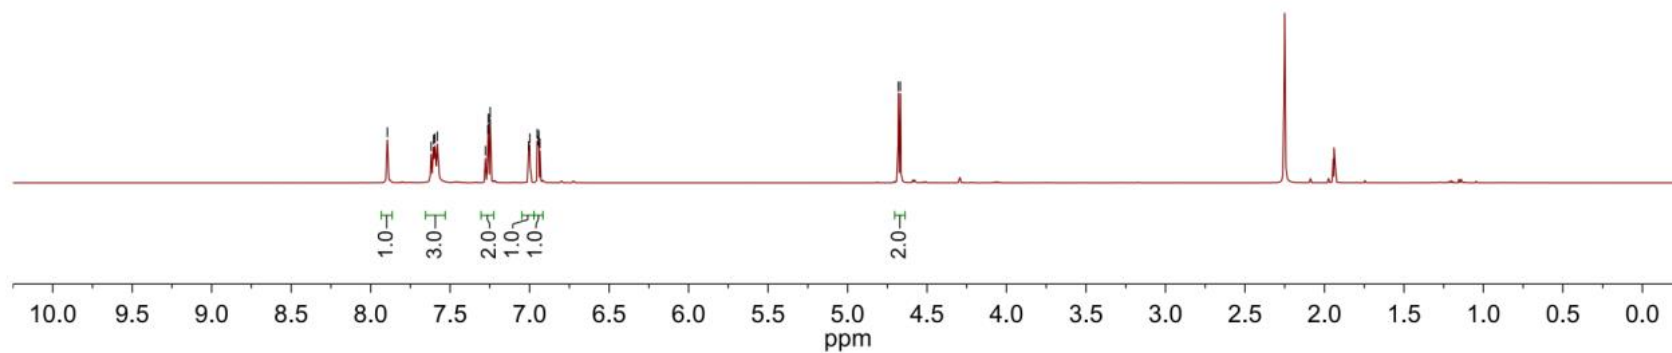

S365

**N-(Thiophen-2-ylmethyl)-4-(trifluoro- $\lambda^4$ -boraneyl)benzamide, potassium salt (46)**

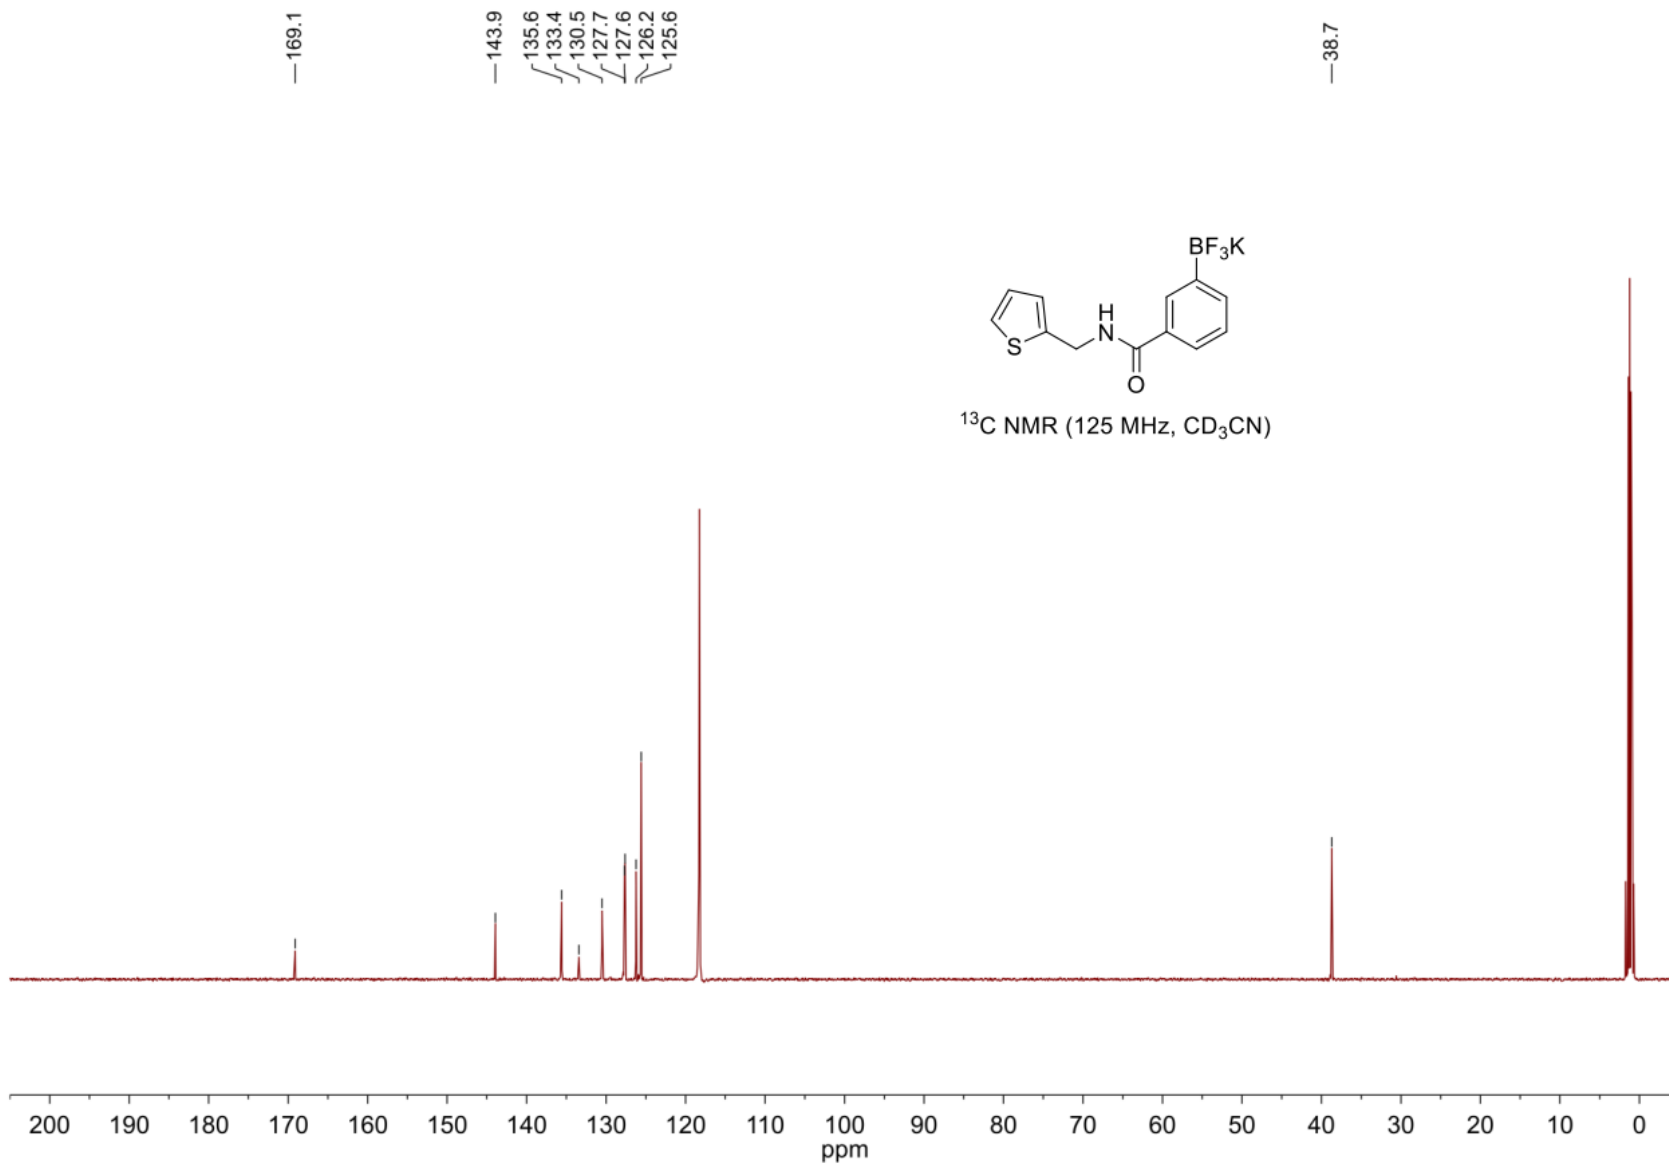

### 3-Ethyl-3-(4-(4,4,5,5-tetramethyl-1,3,2-dioxaborolan-2-yl)phenyl)piperidine-2,6-dione (47)

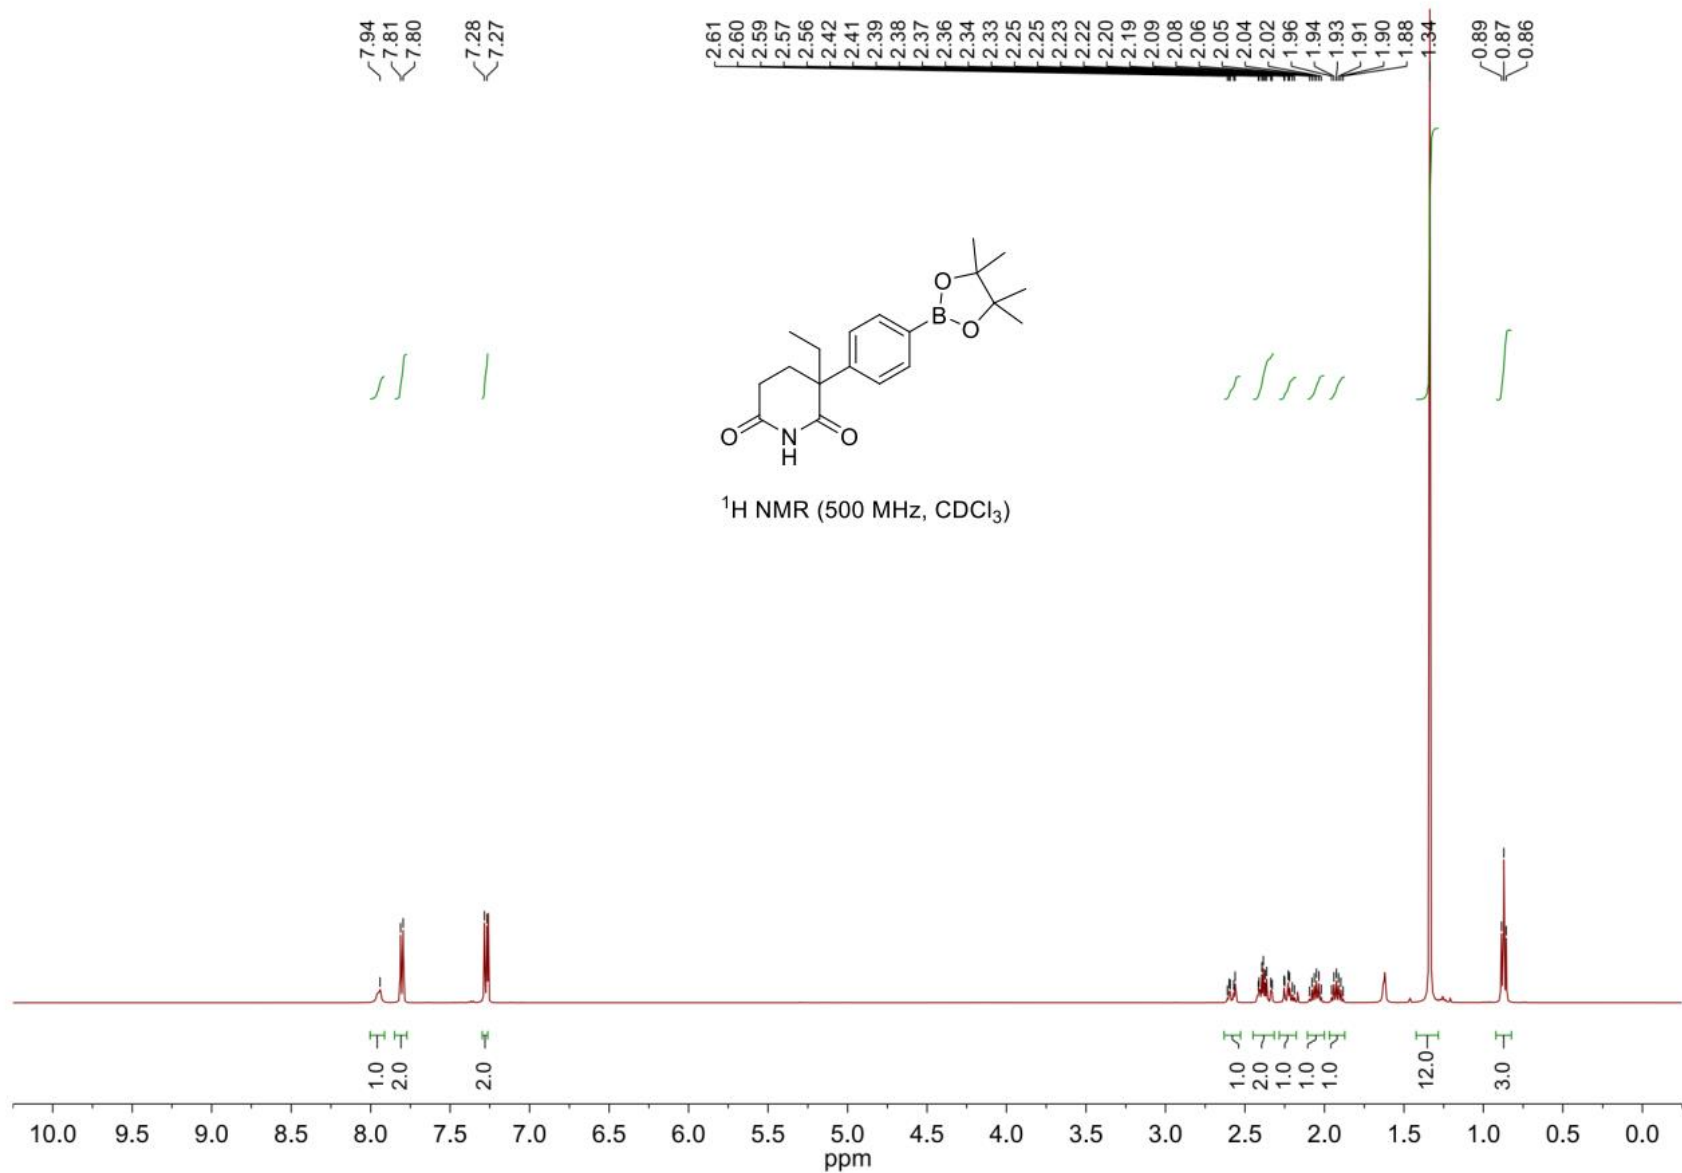

S367

### 3-Ethyl-3-(4-(4,4,5,5-tetramethyl-1,3,2-dioxaborolan-2-yl)phenyl)piperidine-2,6-dione (47)

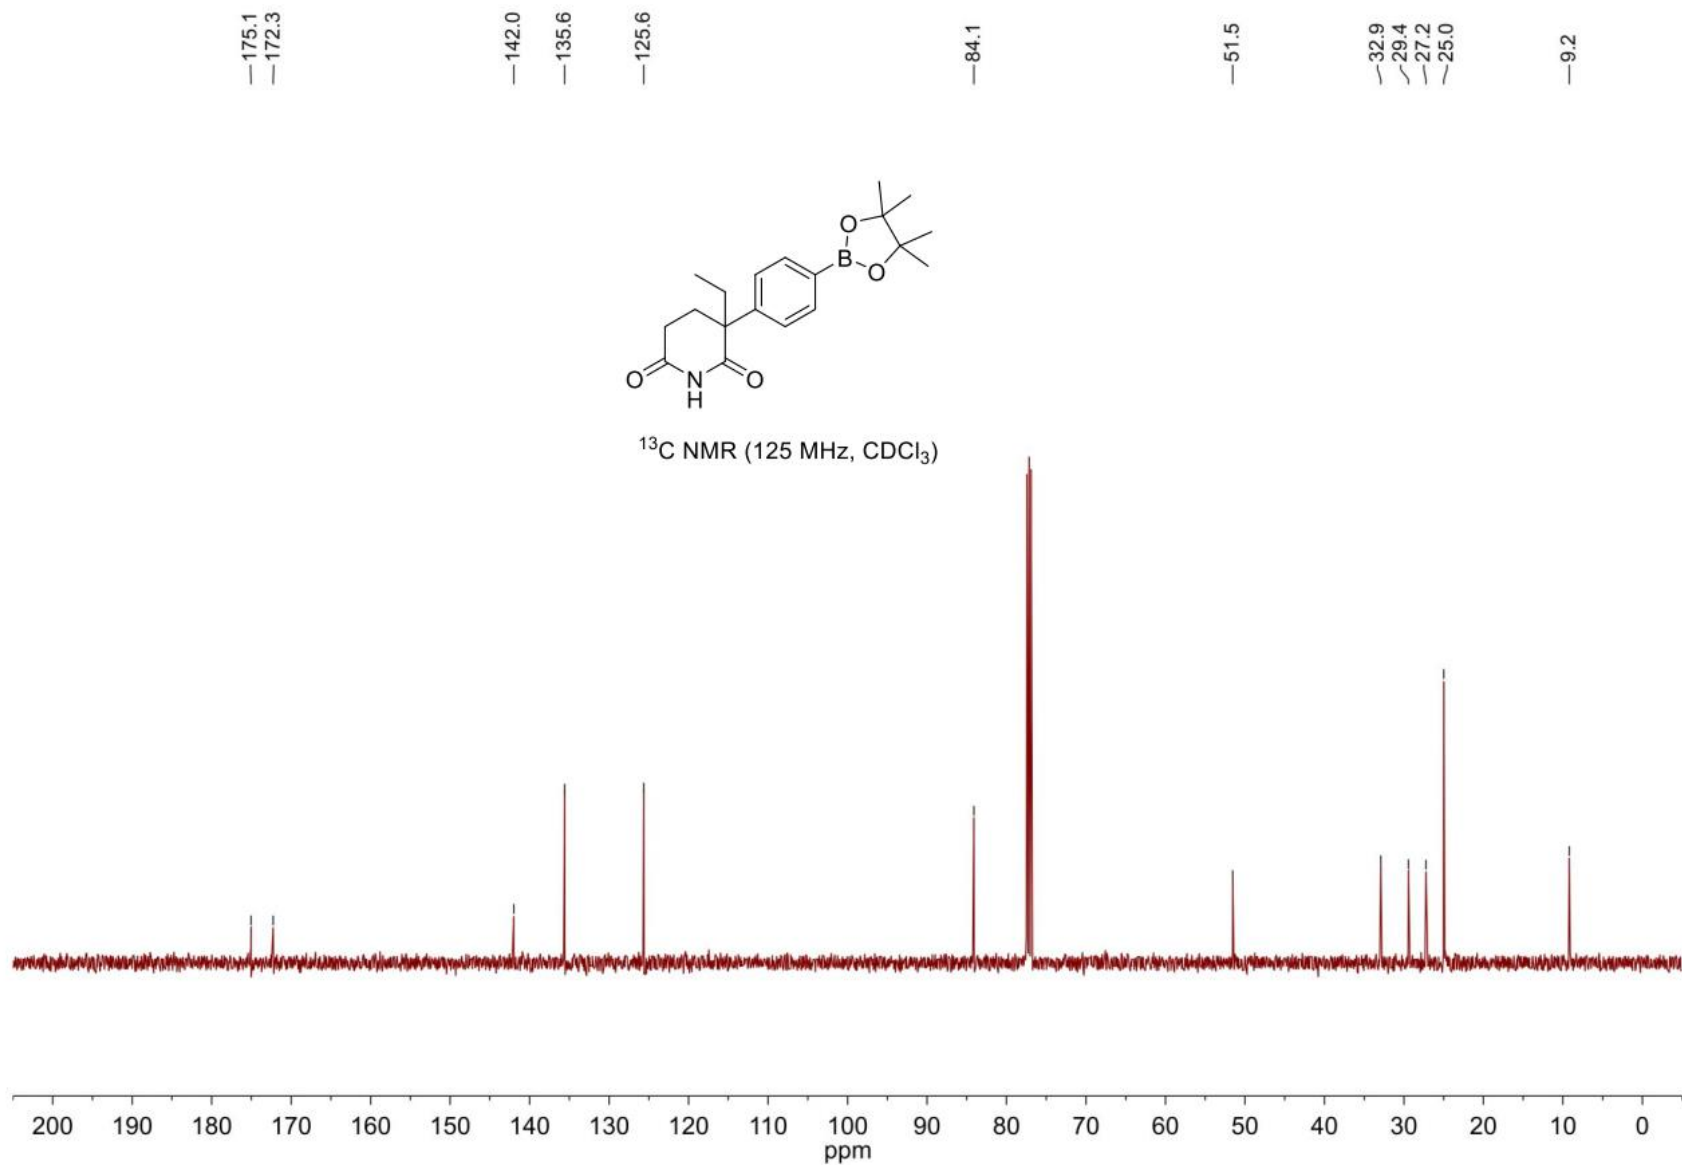

S368



(3-((Dimethylcarbamoyl)oxy)phenyl)boronic acid (48)

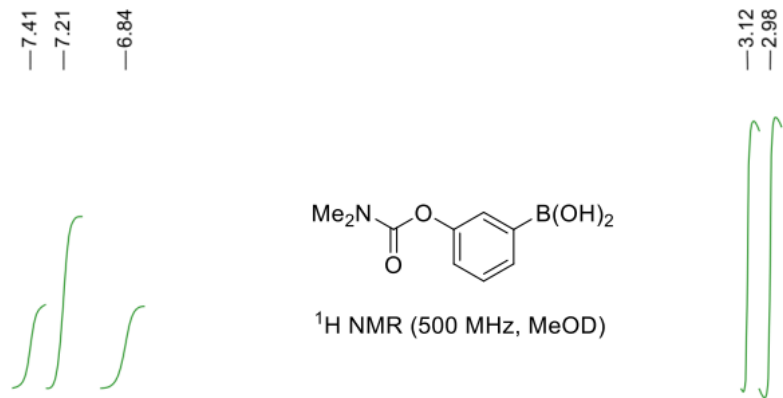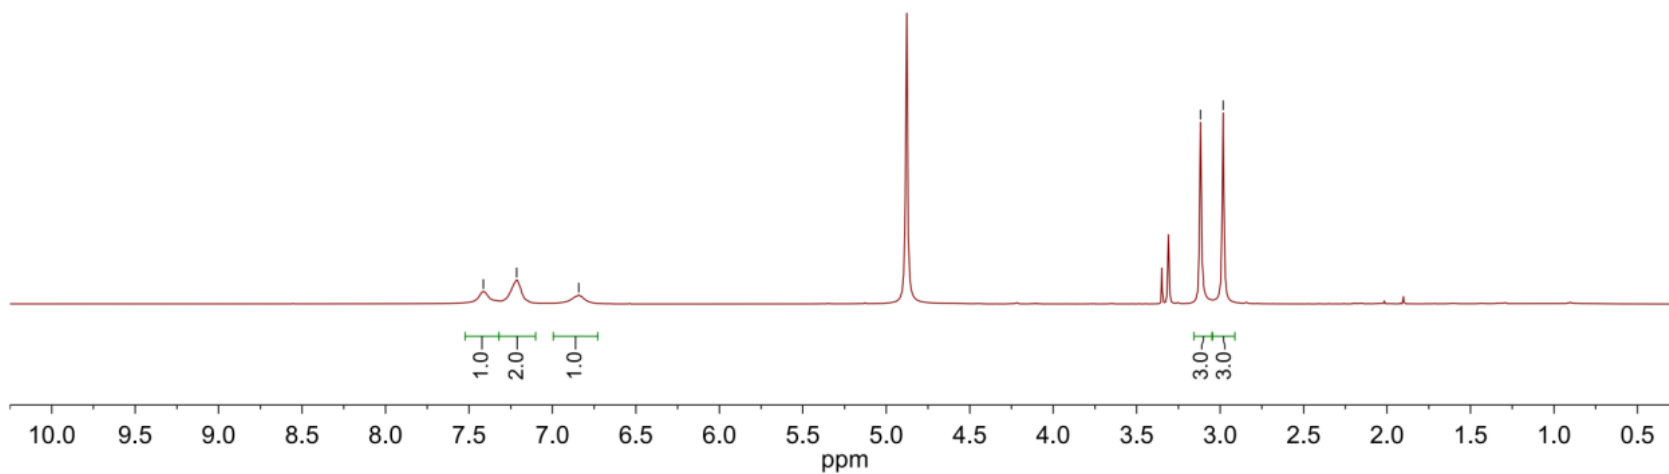

### (3-((Dimethylcarbamoyl)oxy)phenyl)boronic acid (48)

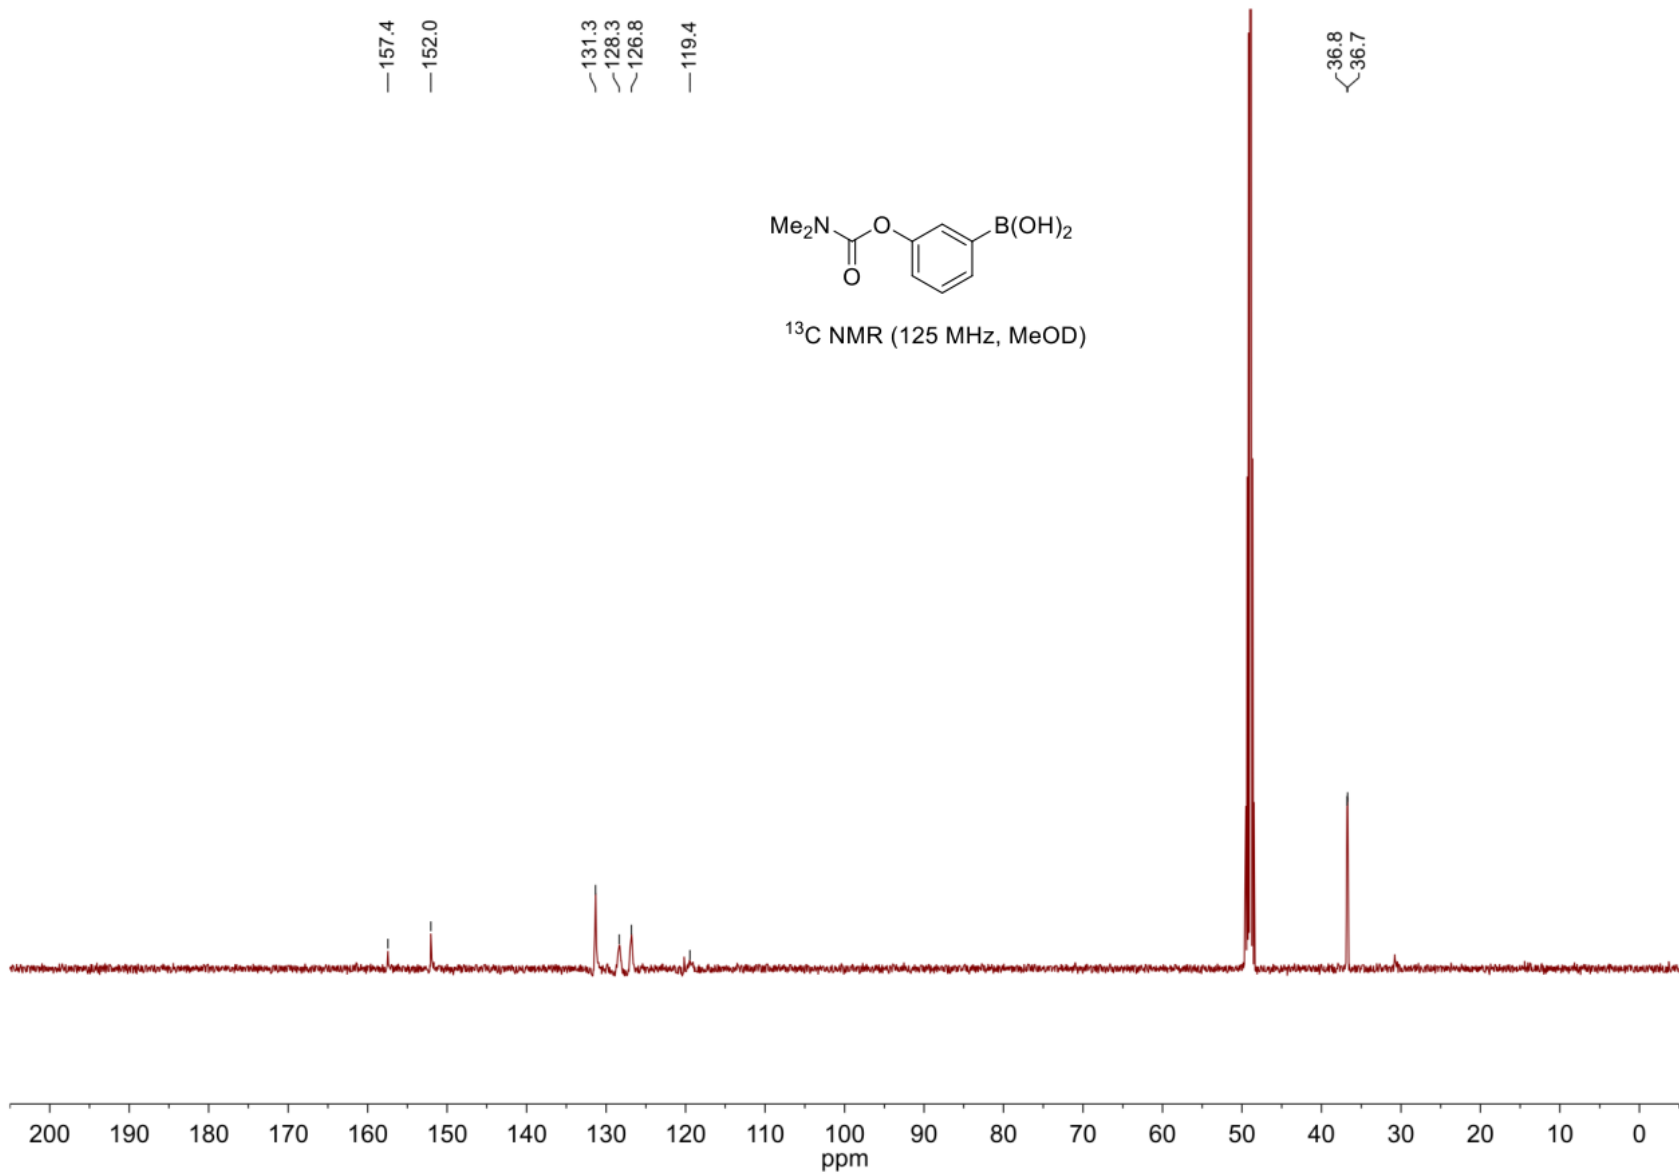

# 2-(2,3-Dimethylphenyl)-4,4,5,5-tetramethyl-1,3,2-dioxaborolane (49)

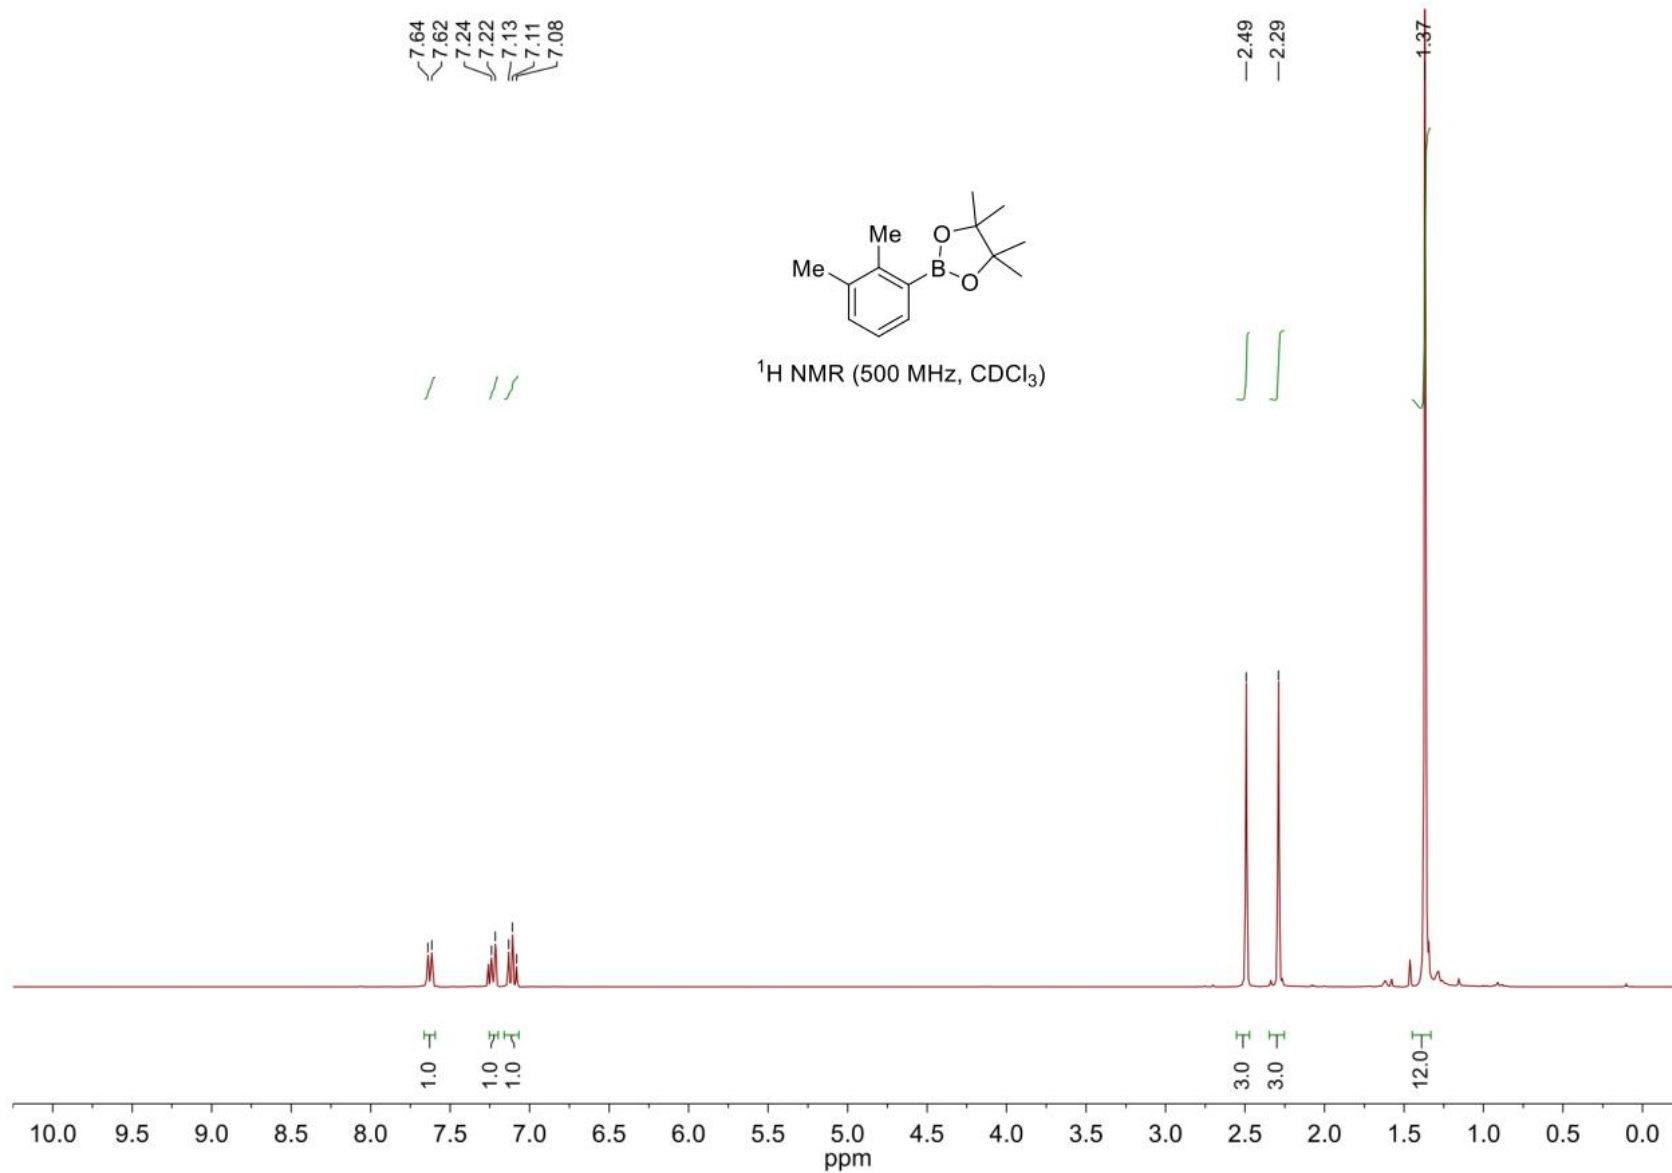

S371

## 2-(2,3-Dimethylphenyl)-4,4,5,5-tetramethyl-1,3,2-dioxaborolane (49)

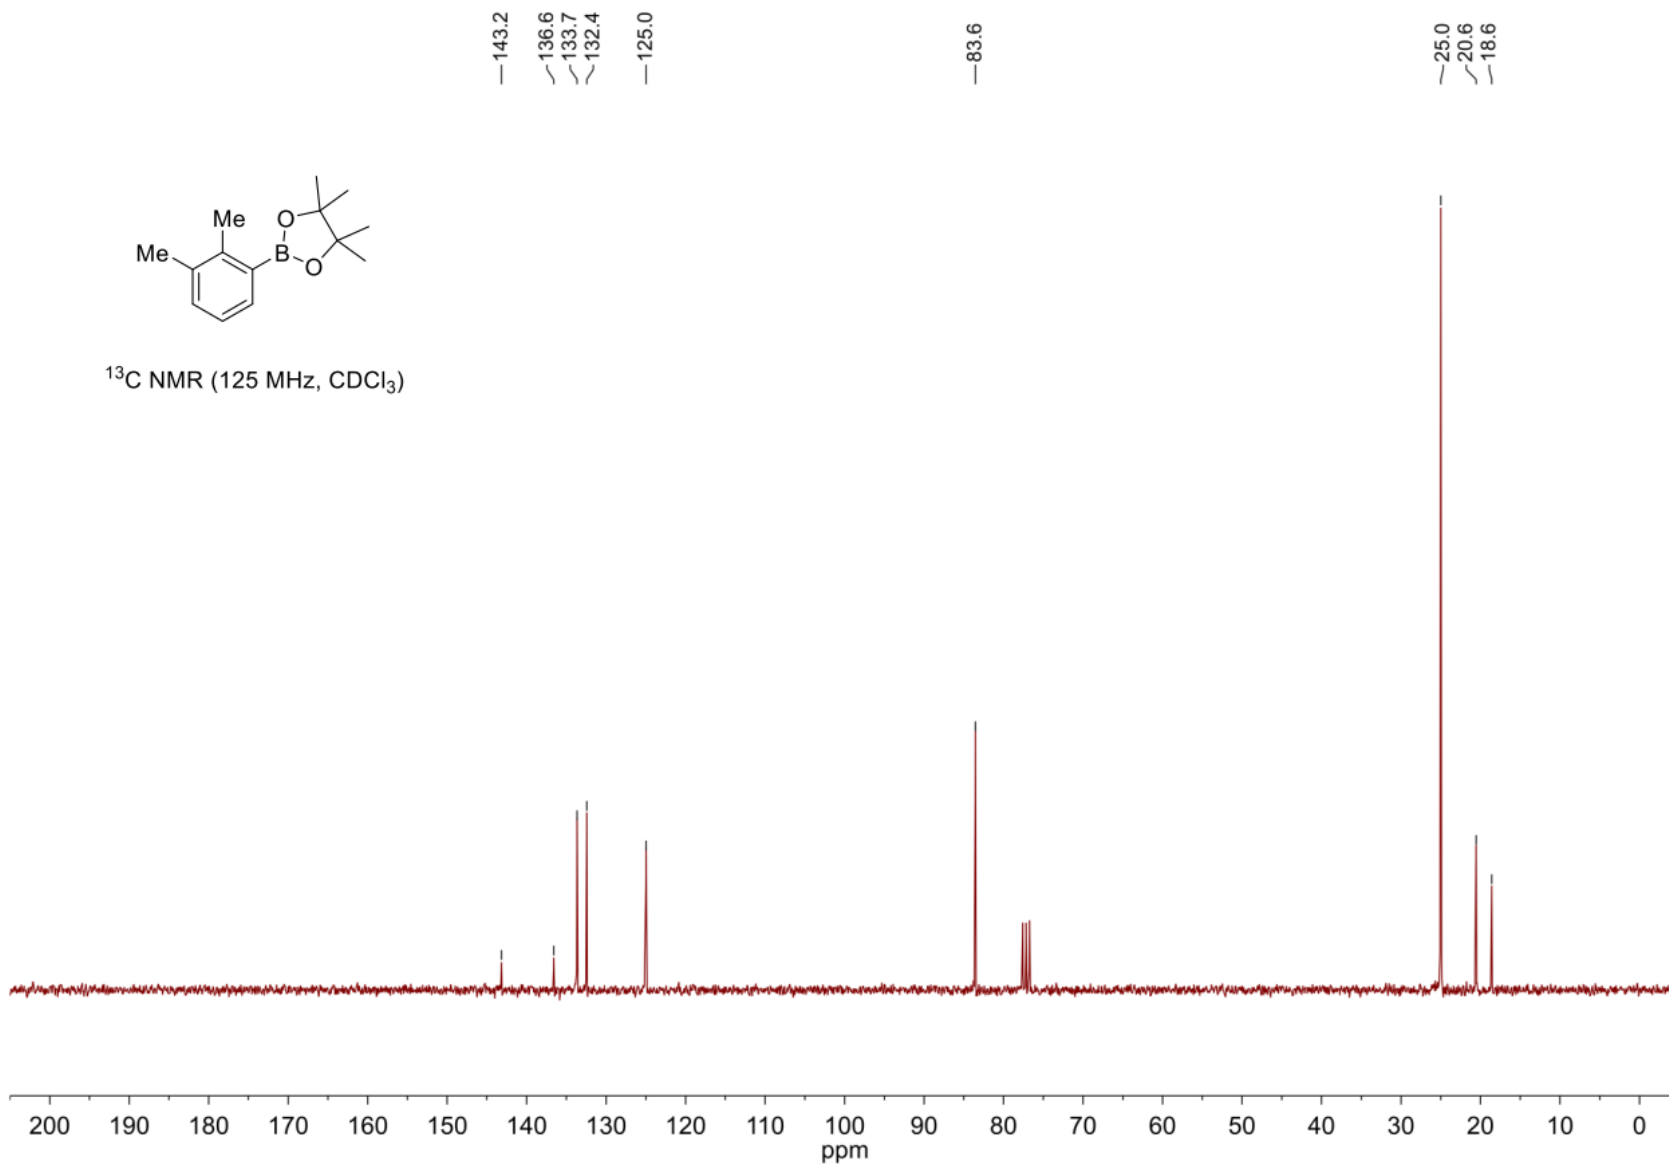

# 2-(2,4-Dimethylphenyl)-4,4,5,5-tetramethyl-1,3,2-dioxaborolane (50)

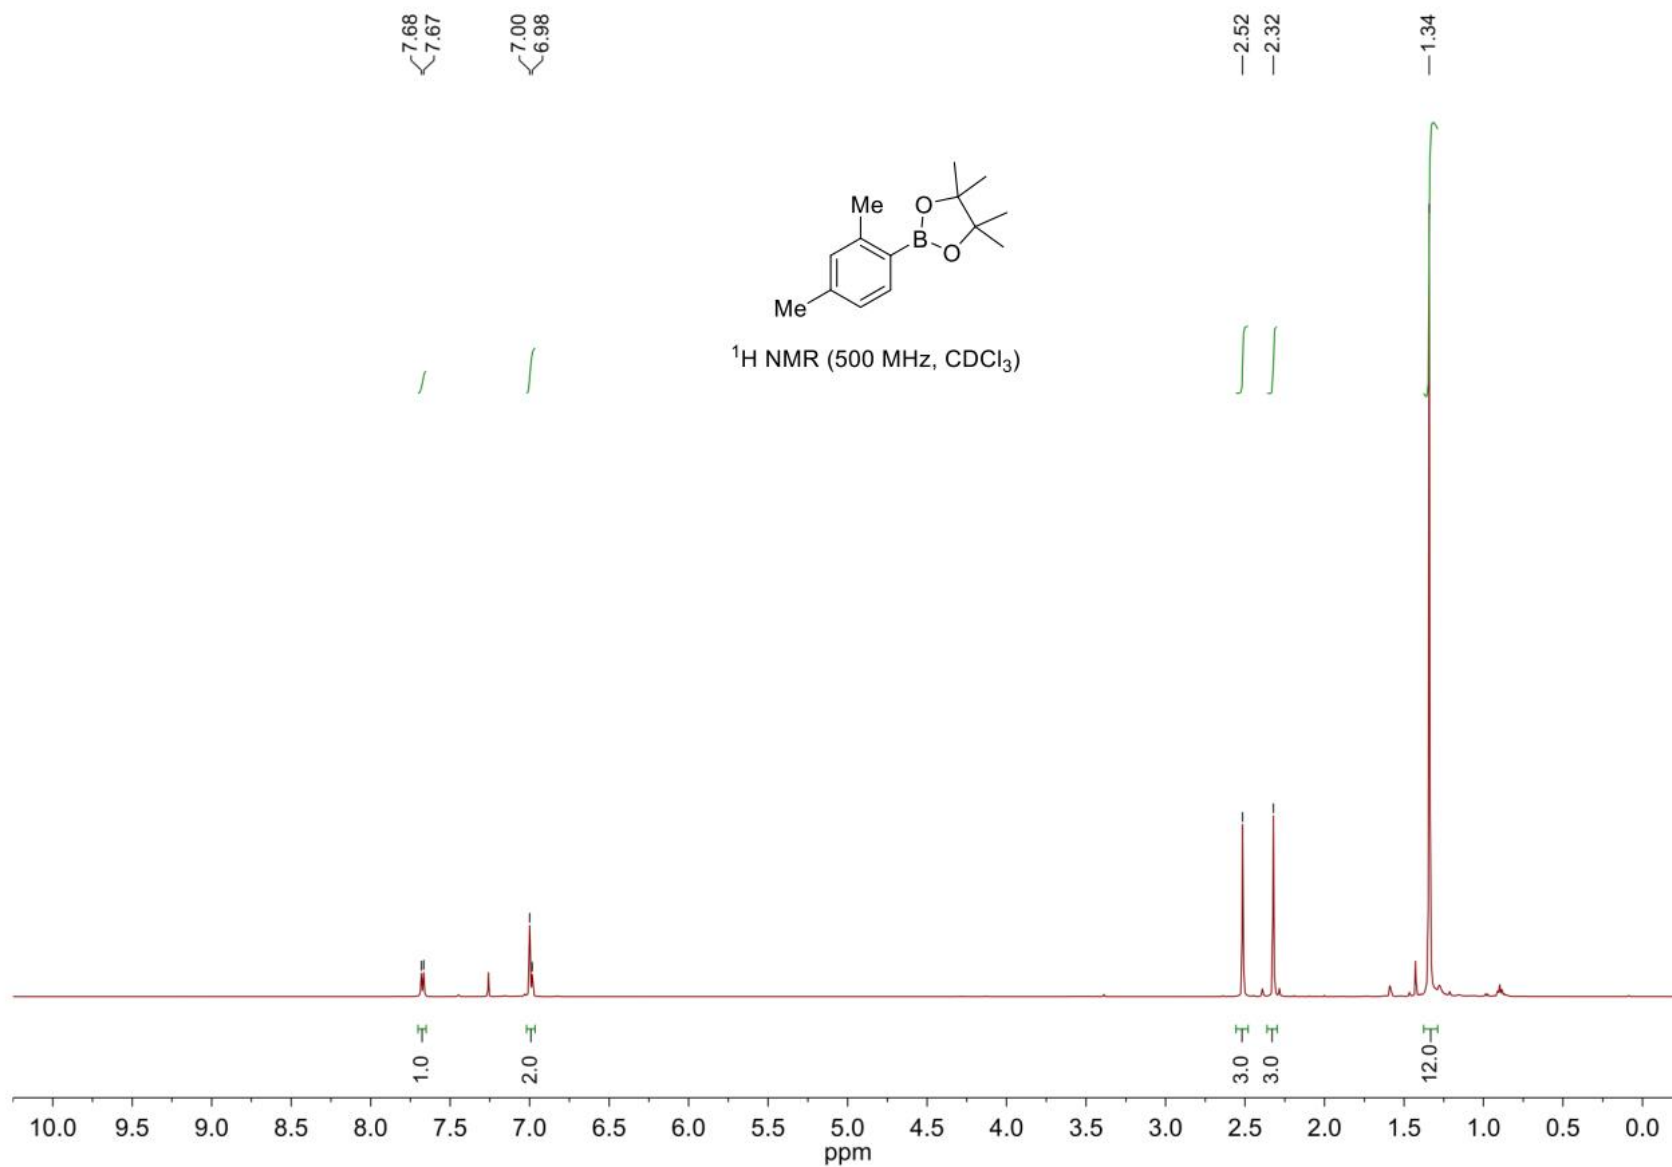

S373

# 2-(2,4-Dimethylphenyl)-4,4,5,5-tetramethyl-1,3,2-dioxaborolane (50)

145.1  
141.0  
136.2  
130.9  
125.7

83.4

25.0  
22.3  
21.6

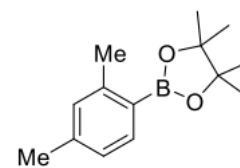

$^{13}\text{C}$  NMR (125 MHz,  $\text{CDCl}_3$ )

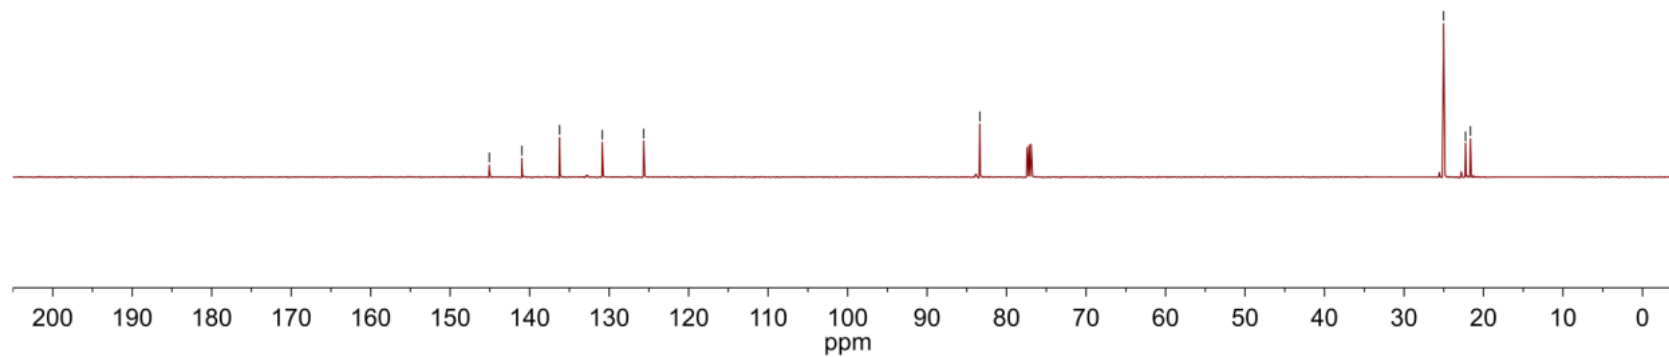

2-(2-Fluorophenyl)-4,4,5,5-tetramethyl-1,3,2-dioxaborolane (51)

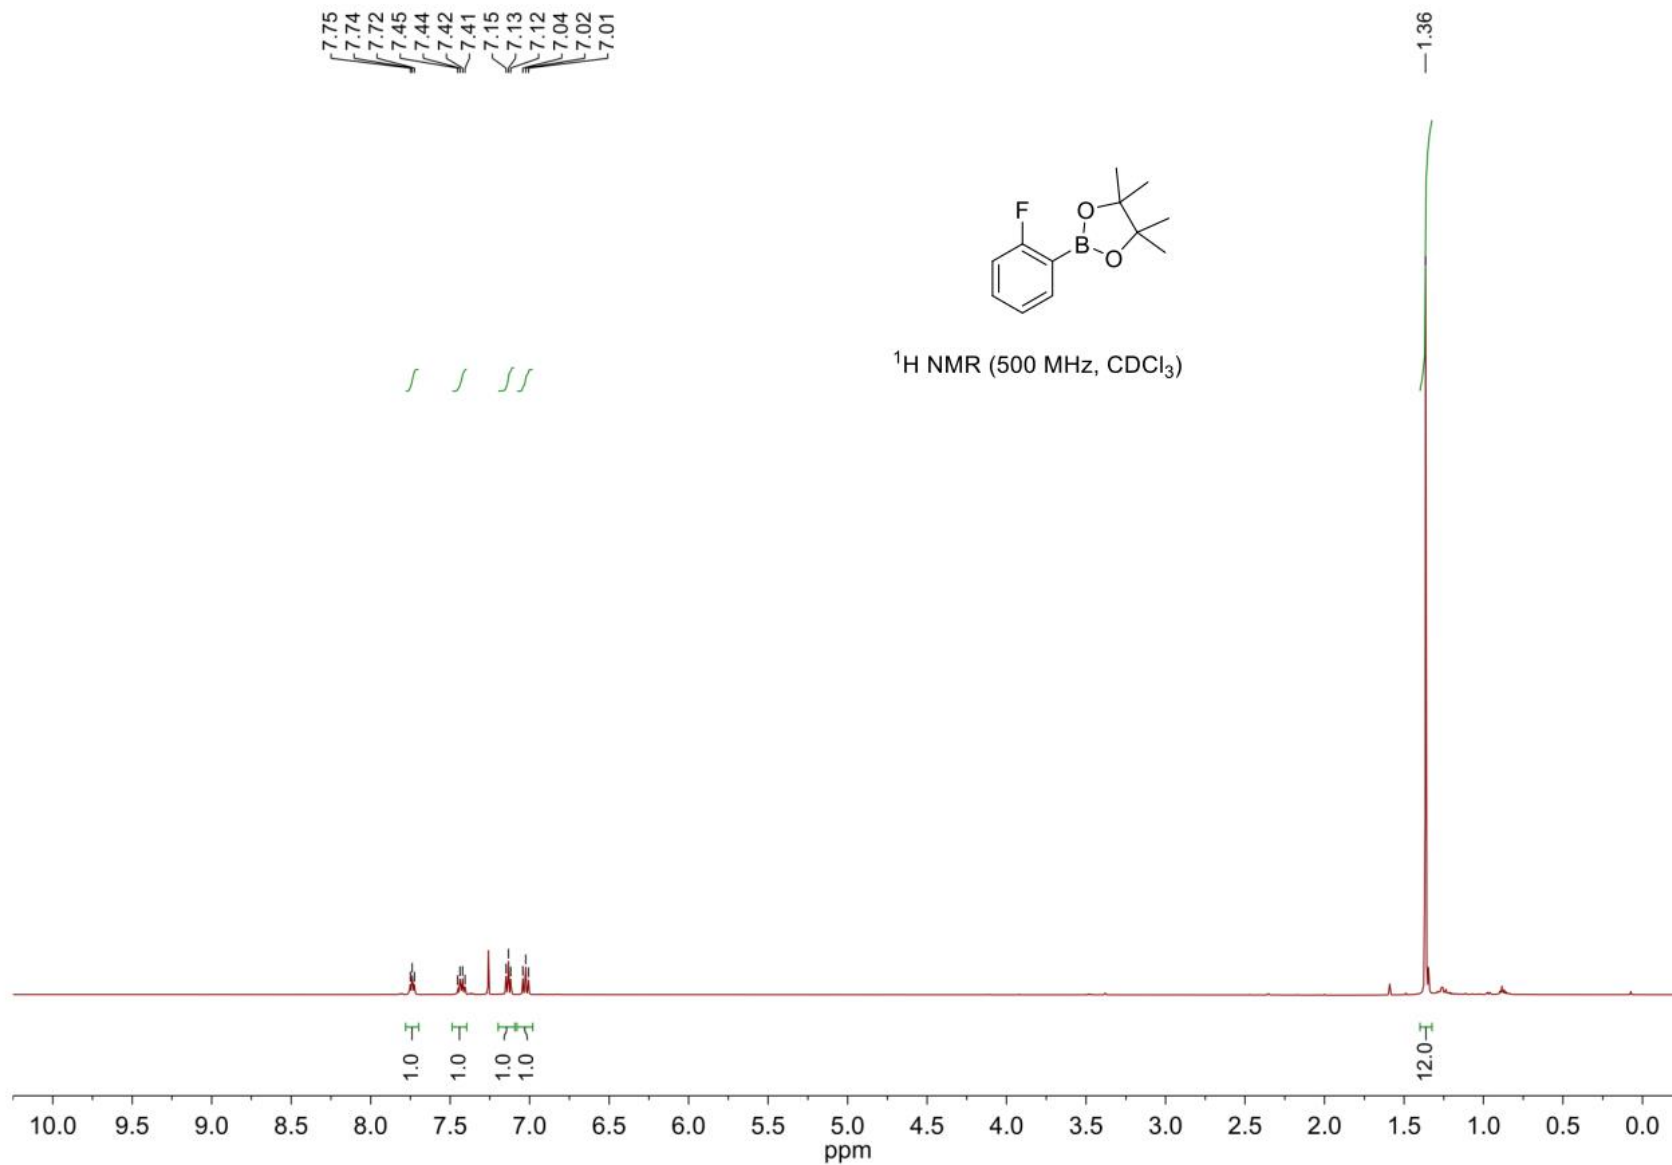

S375

## 2-(2-Fluorophenyl)-4,4,5,5-tetramethyl-1,3,2-dioxaborolane (51)

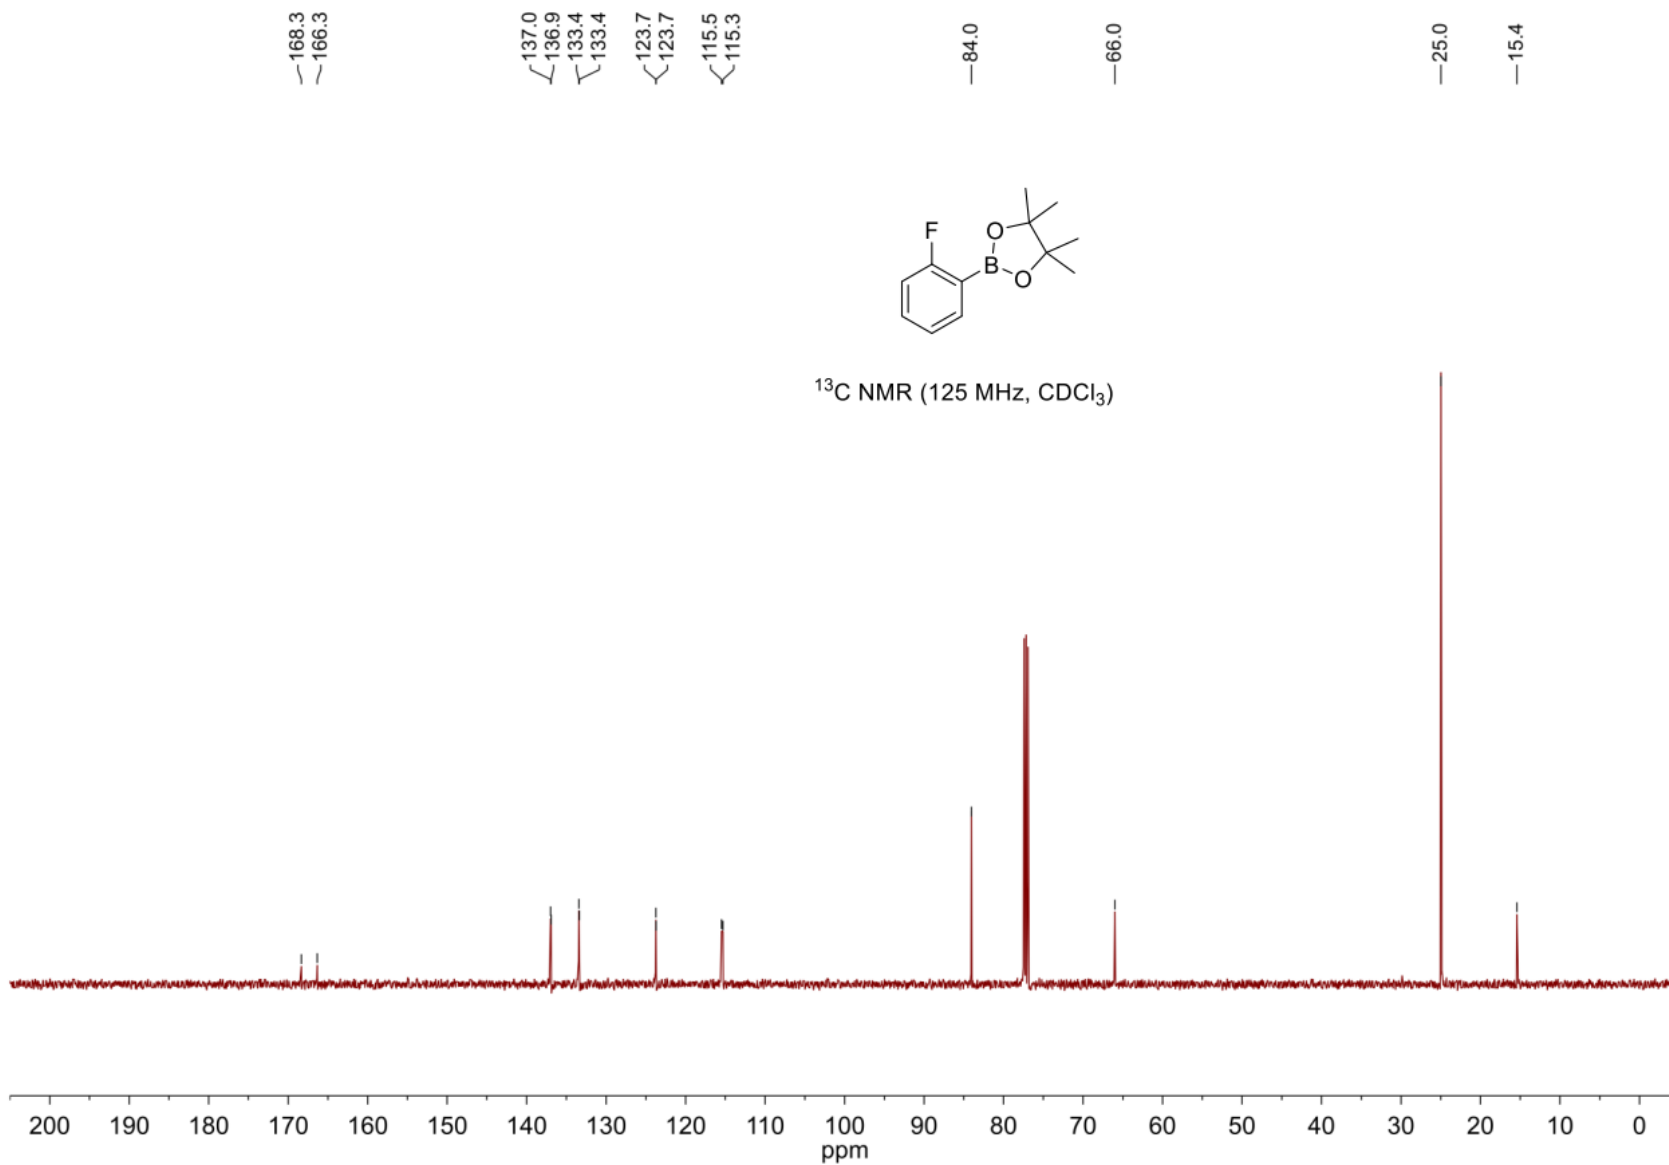

S376



# 2-(4-Fluorophenyl)-4,4,5,5-tetramethyl-1,3,2-dioxaborolane (52)

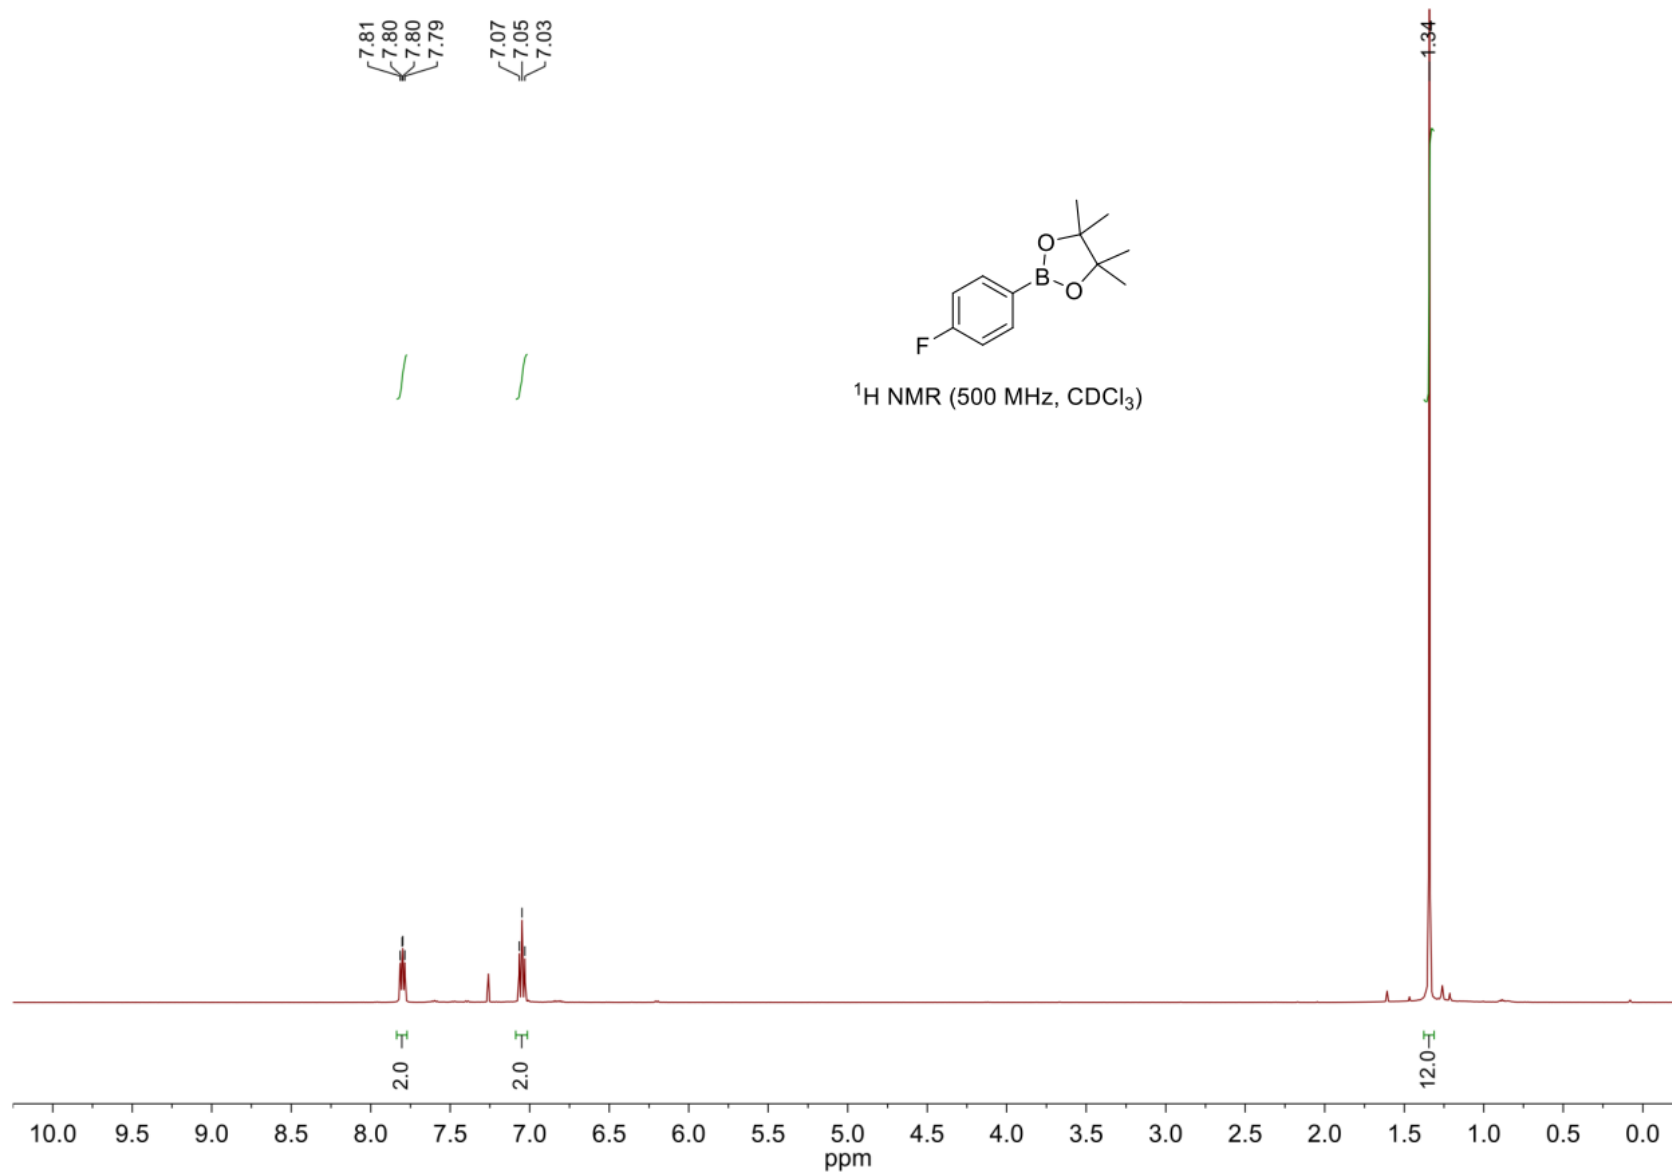

S377

## 2-(4-Fluorophenyl)-4,4,5,5-tetramethyl-1,3,2-dioxaborolane (52)

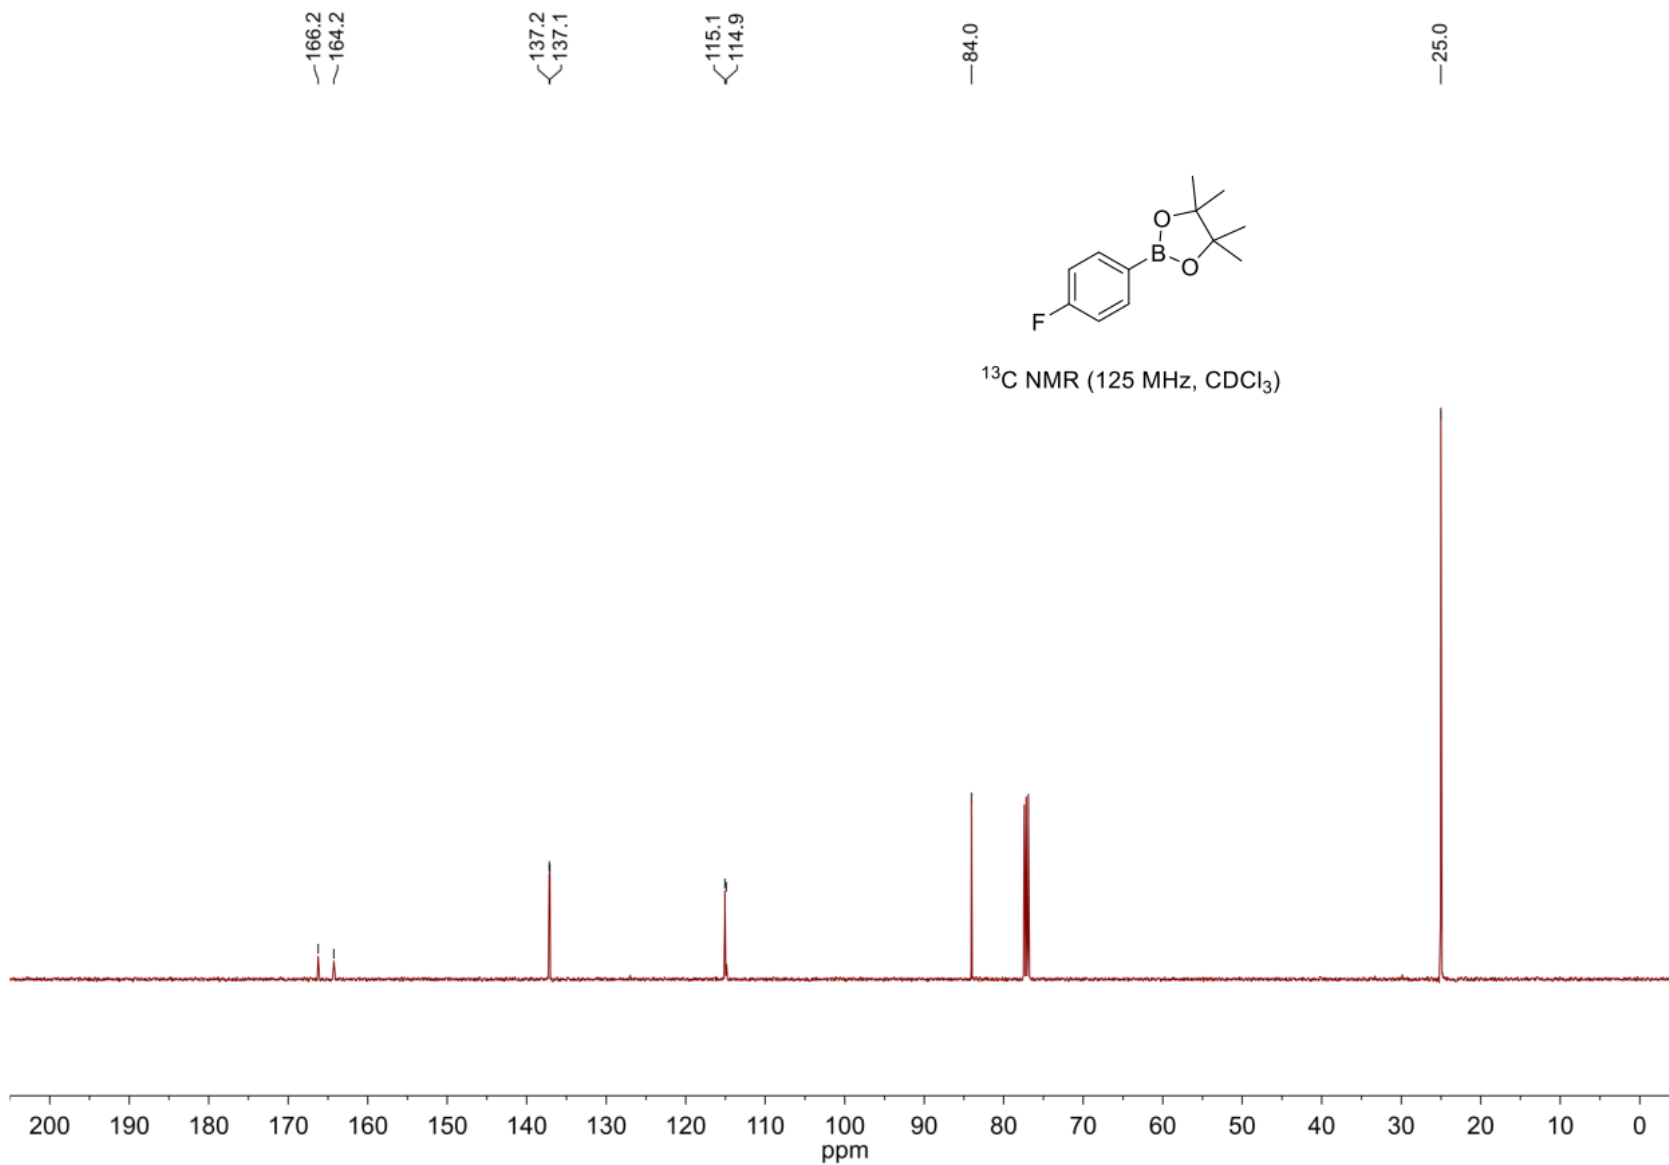

2-(2-Fluoro-4-methylphenyl)-4,4,5,5-tetramethyl-1,3,2-dioxaborolane (53)

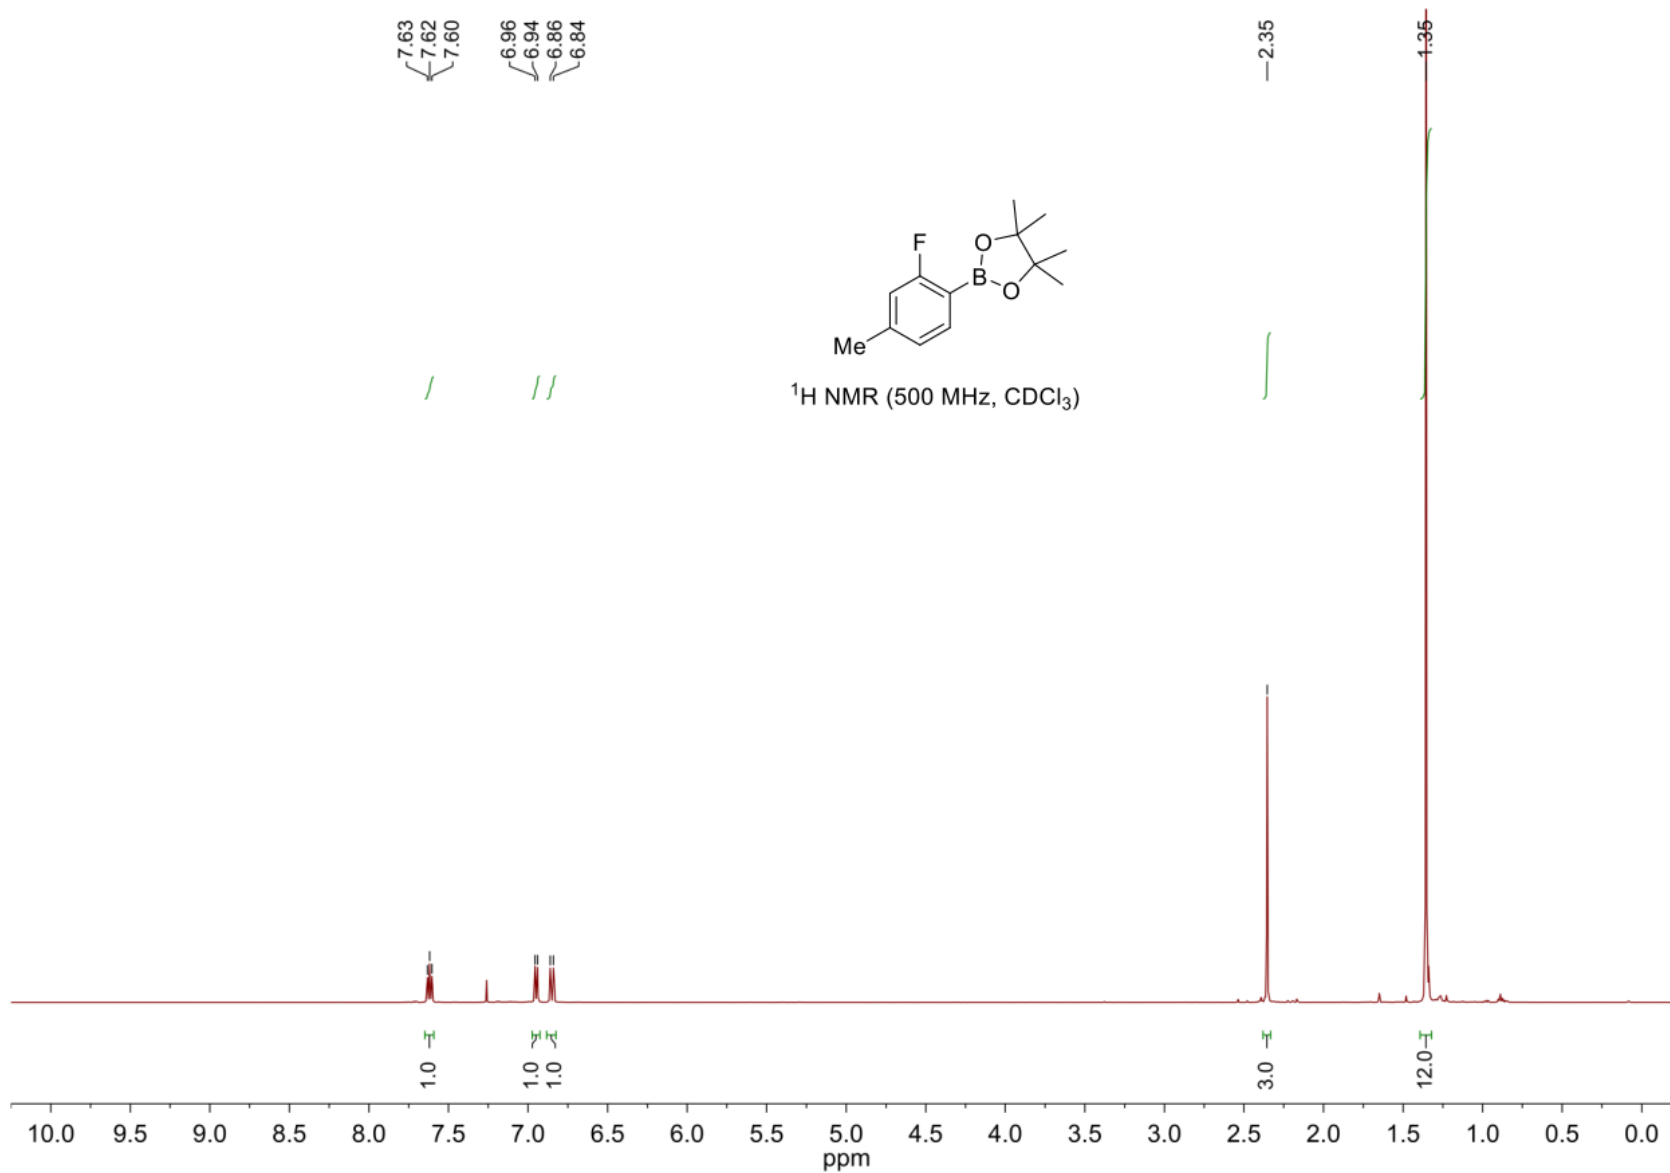

## 2-(2-Fluoro-4-methylphenyl)-4,4,5,5-tetramethyl-1,3,2-dioxaborolane (53)

168.5  
166.5

144.5  
144.4

136.8  
136.7

124.6  
124.6

116.0  
115.9

83.8

24.9  
21.6

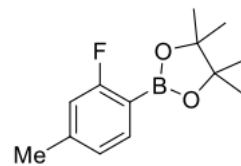

$^{13}\text{C}$  NMR (125 MHz,  $\text{CDCl}_3$ )

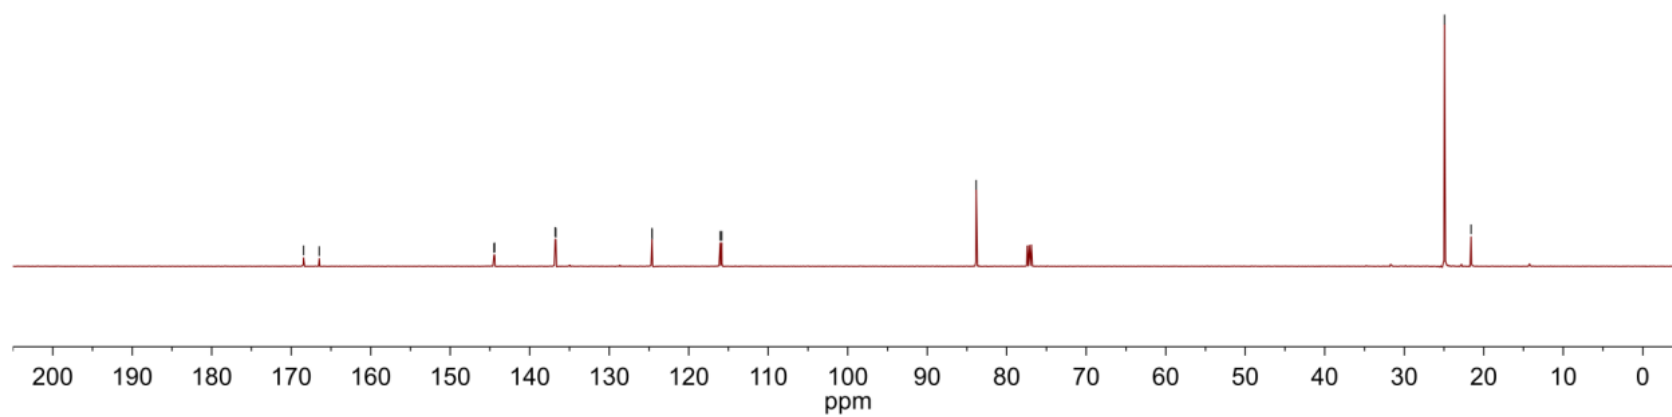

S380

4,4,5,5-Tetramethyl-2-(4-(trifluoromethyl)phenyl)-1,3,2-dioxaborolane (54)

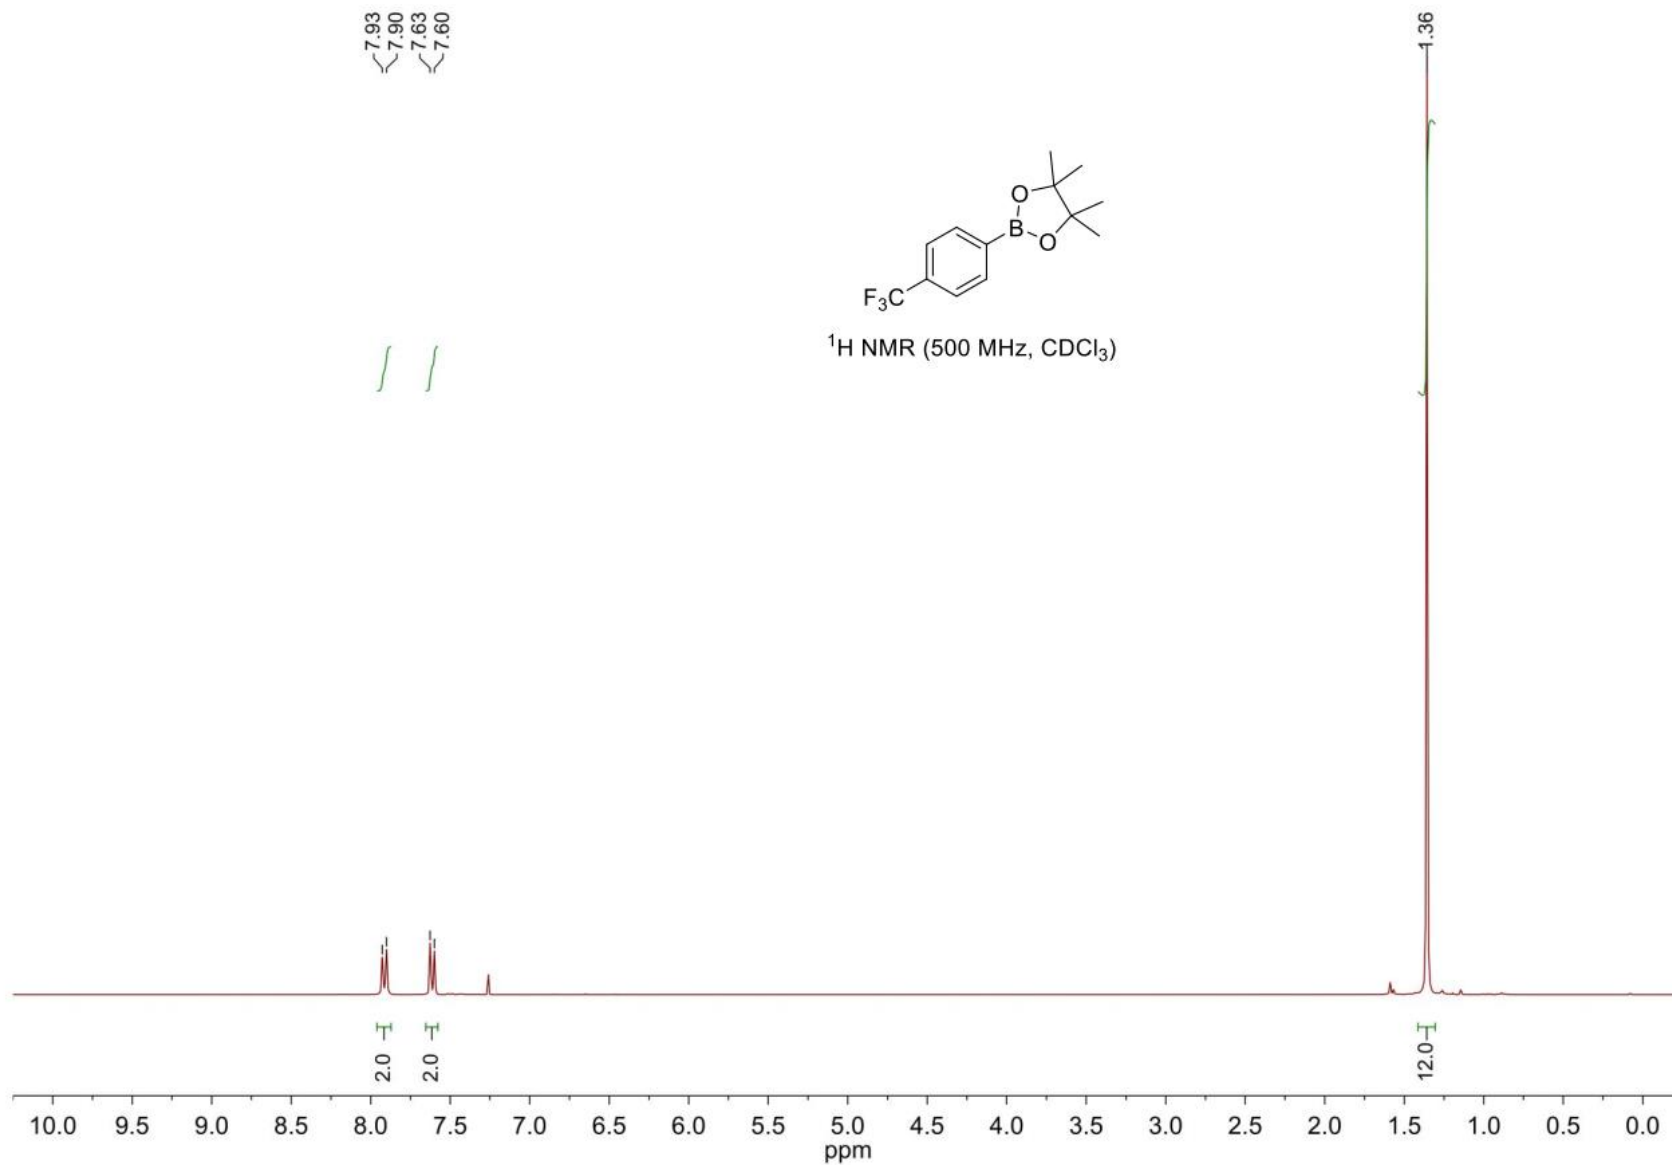

# 4,4,5,5-Tetramethyl-2-(4-(trifluoromethyl)phenyl)-1,3,2-dioxaborolane (54)

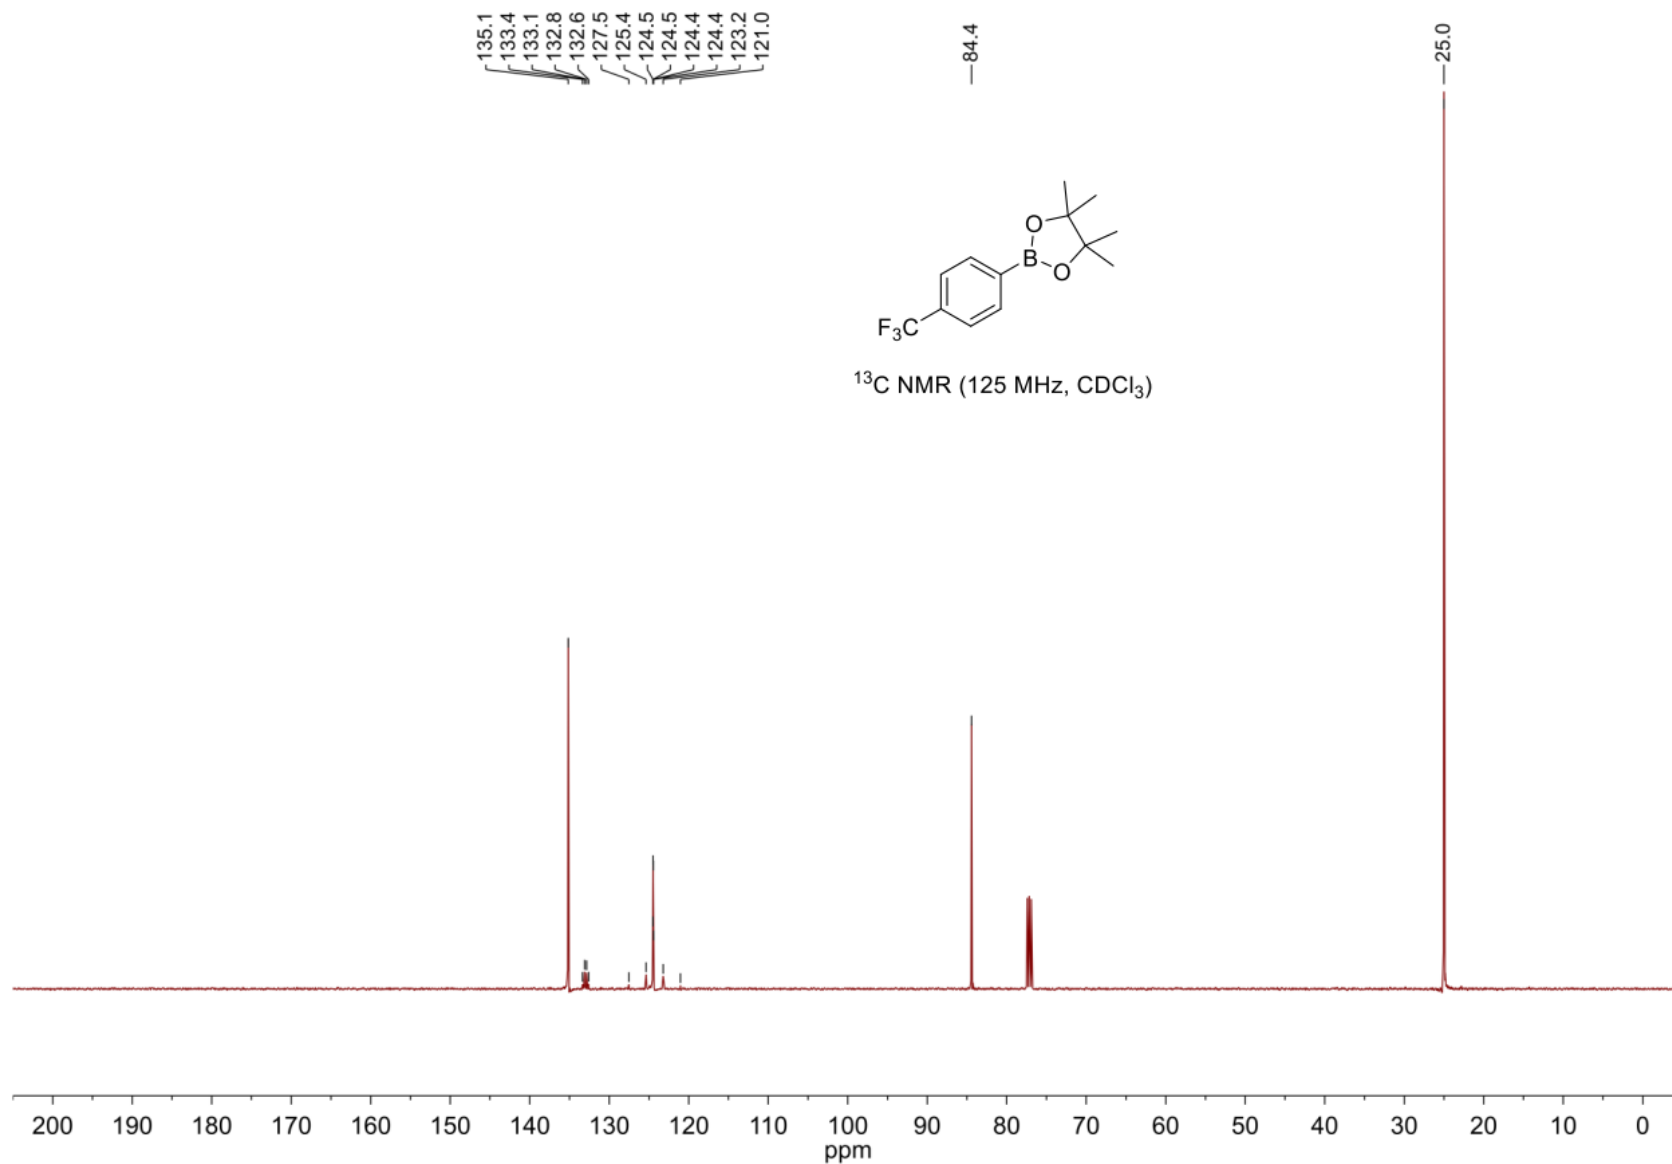

4,4,5,5-Tetramethyl-2-(2-methyl-3-(trifluoromethyl)phenyl)-1,3,2-dioxaborolane (55)

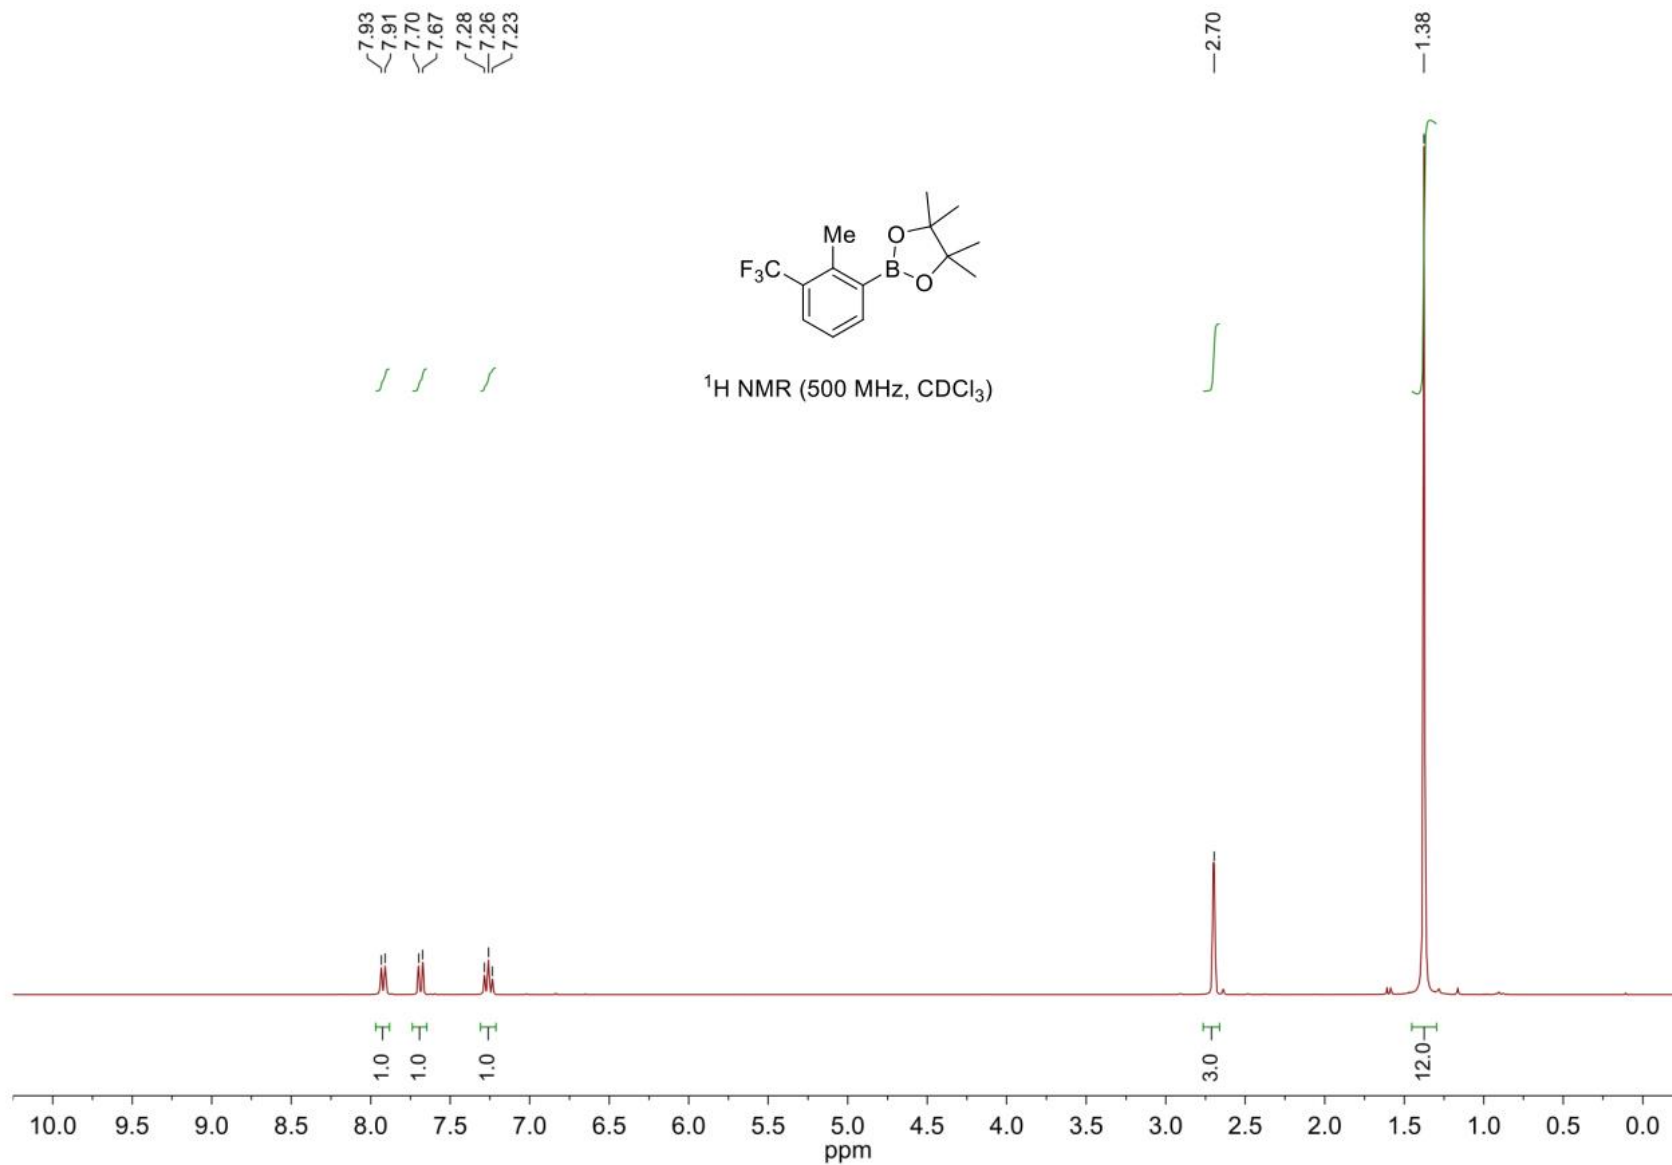

S383

4,4,5,5-Tetramethyl-2-(2-methyl-3-(trifluoromethyl)phenyl)-1,3,2-dioxaborolane (55)

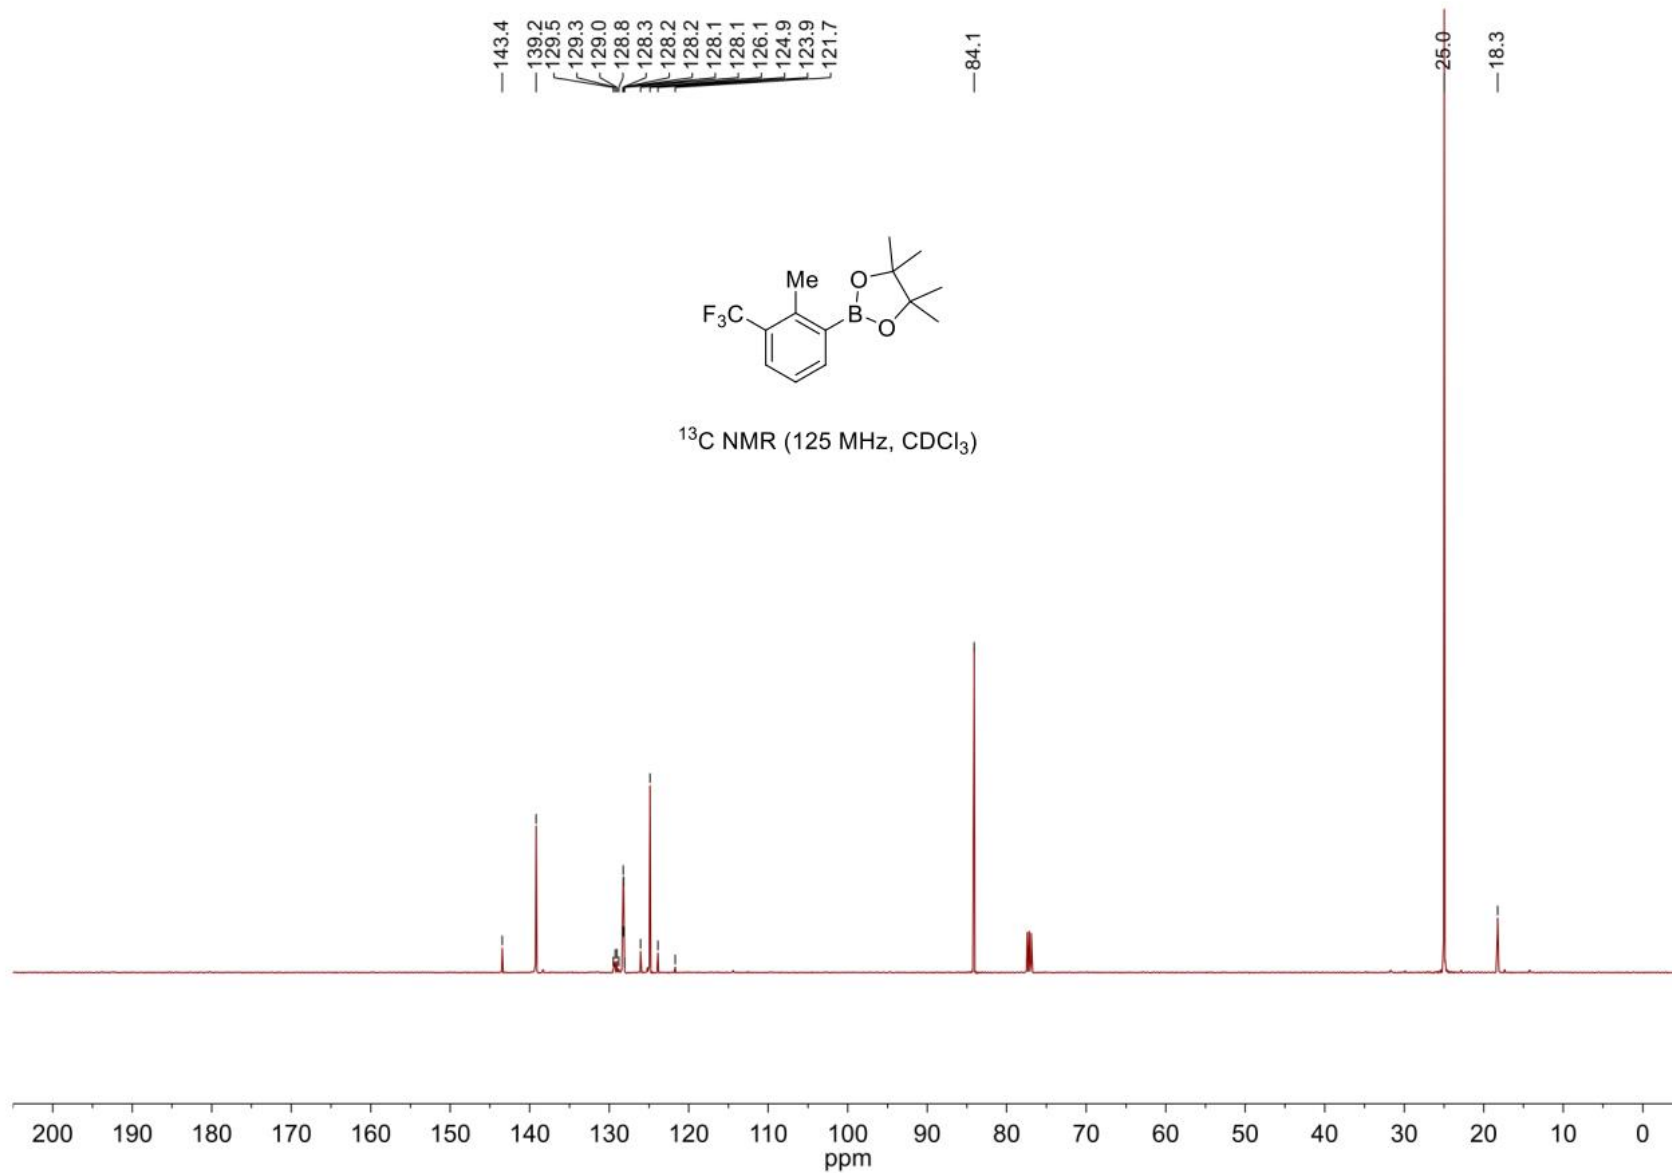



2-(3-Fluoro-4-methoxyphenyl)-4,4,5,5-tetramethyl-1,3,2-dioxaborolane (56)

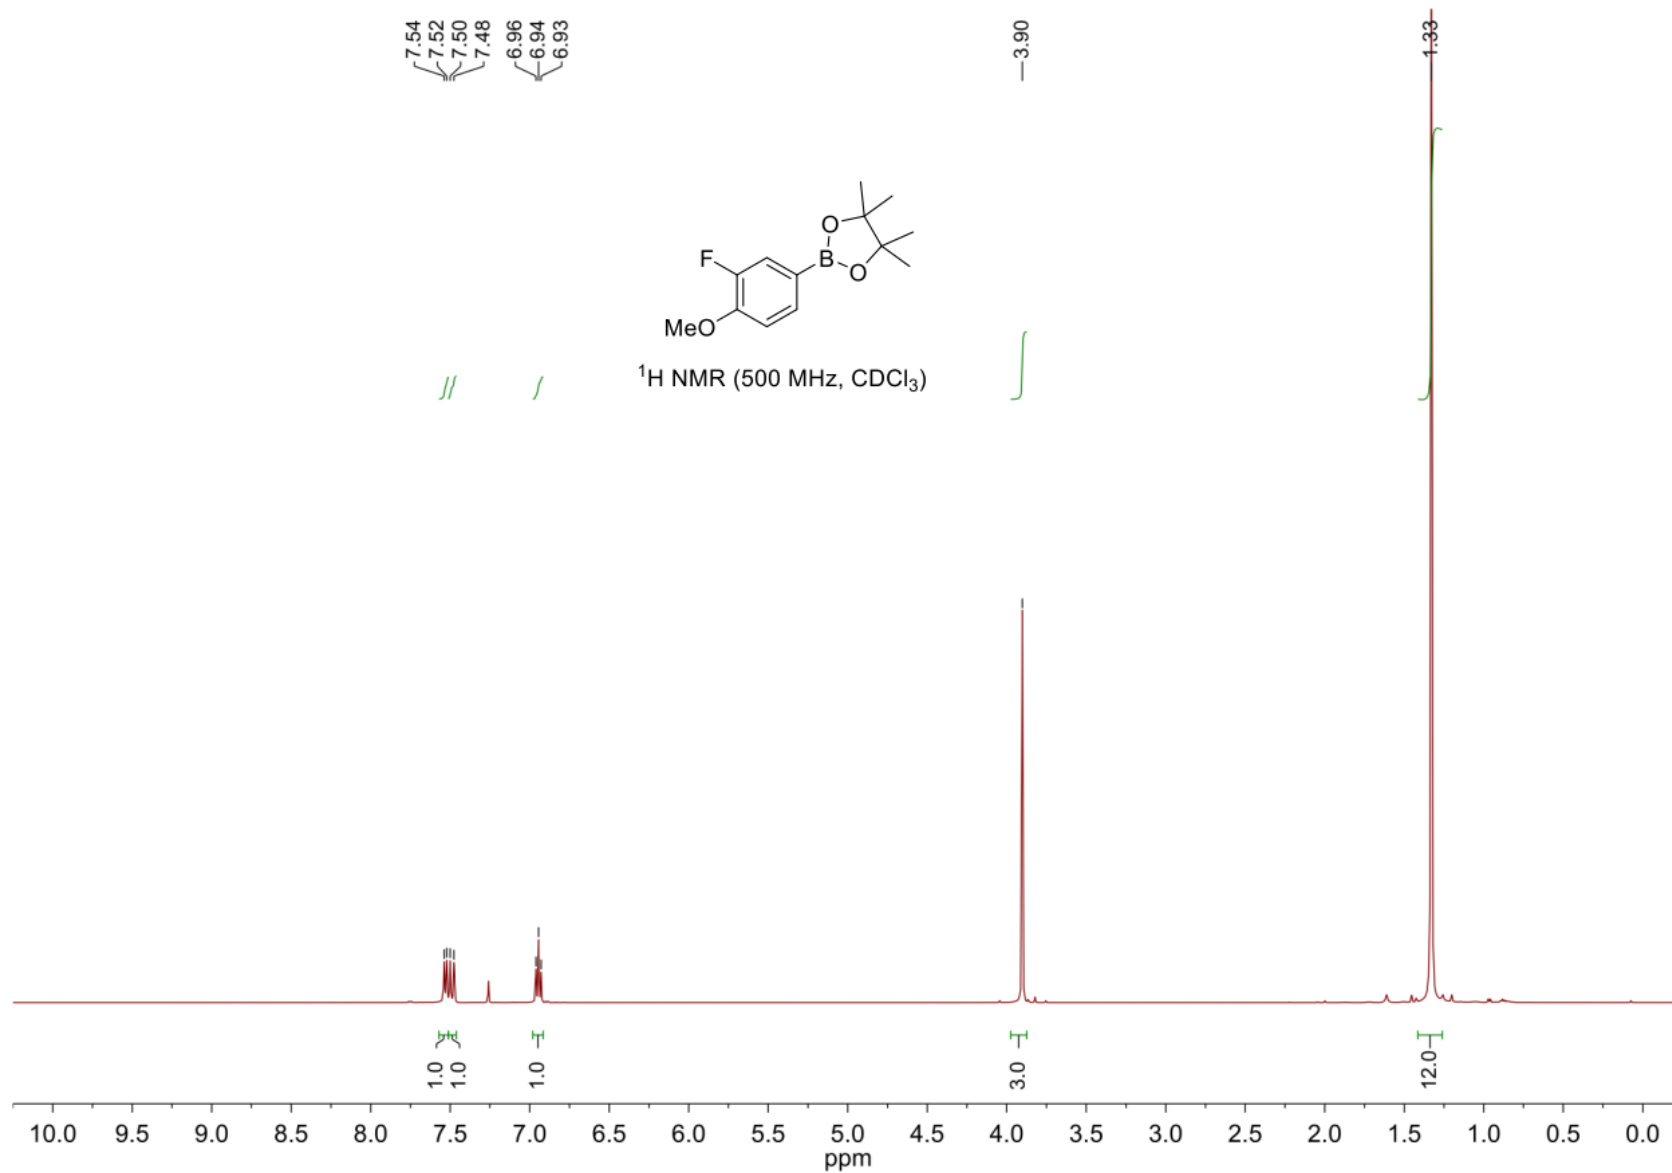

S385

## 2-(3-Fluoro-4-methoxyphenyl)-4,4,5,5-tetramethyl-1,3,2-dioxaborolane (56)

153.1  
151.2  
150.4  
150.3

131.6  
131.6

121.9  
121.8

112.7

84.0

56.2

25.0

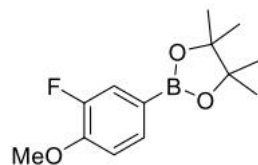

$^{13}\text{C}$  NMR (125 MHz,  $\text{CDCl}_3$ )

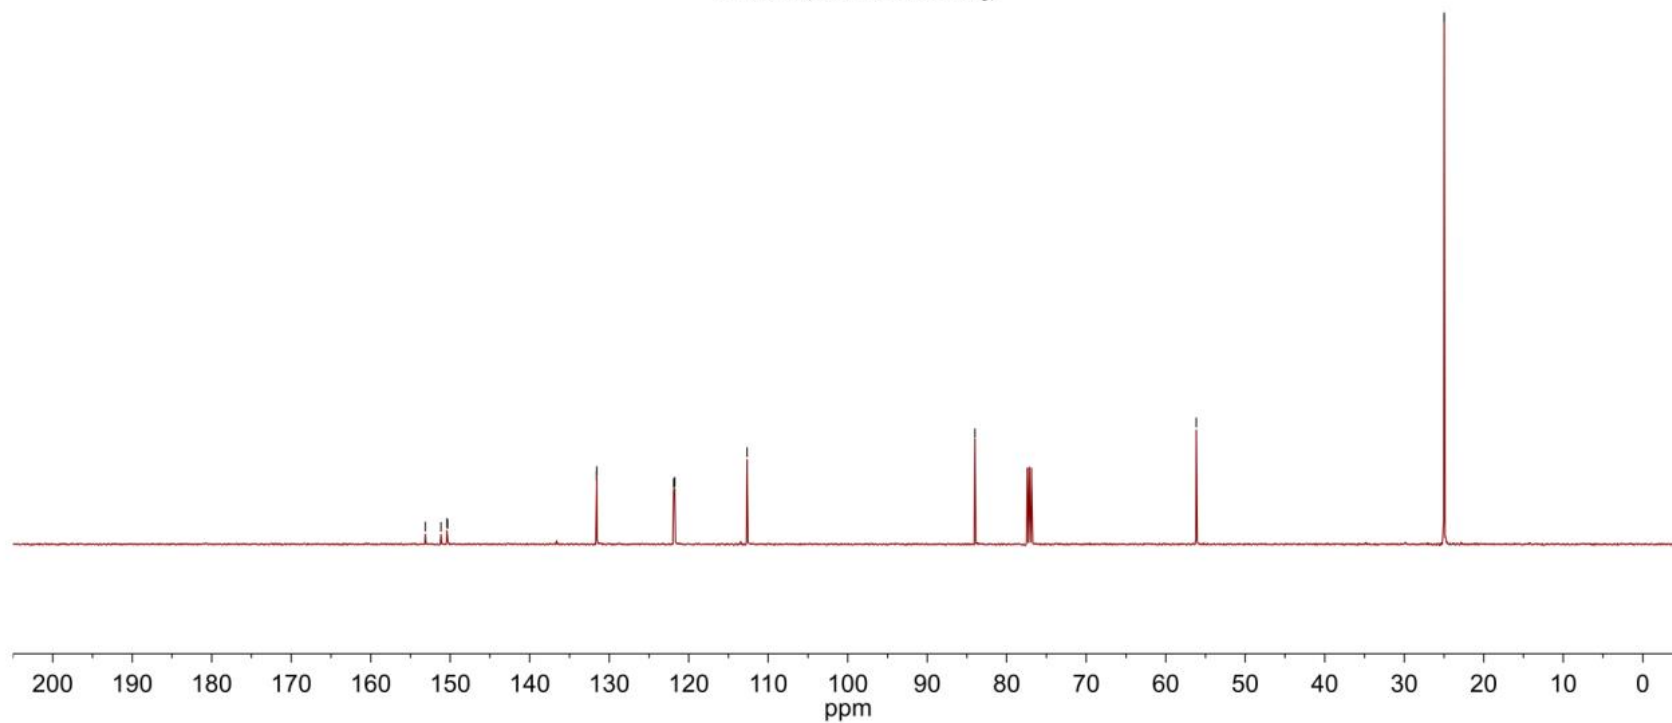

S386

2-(3-(Difluoromethoxy)phenyl)-4,4,5,5-tetramethyl-1,3,2-dioxaborolane (57)

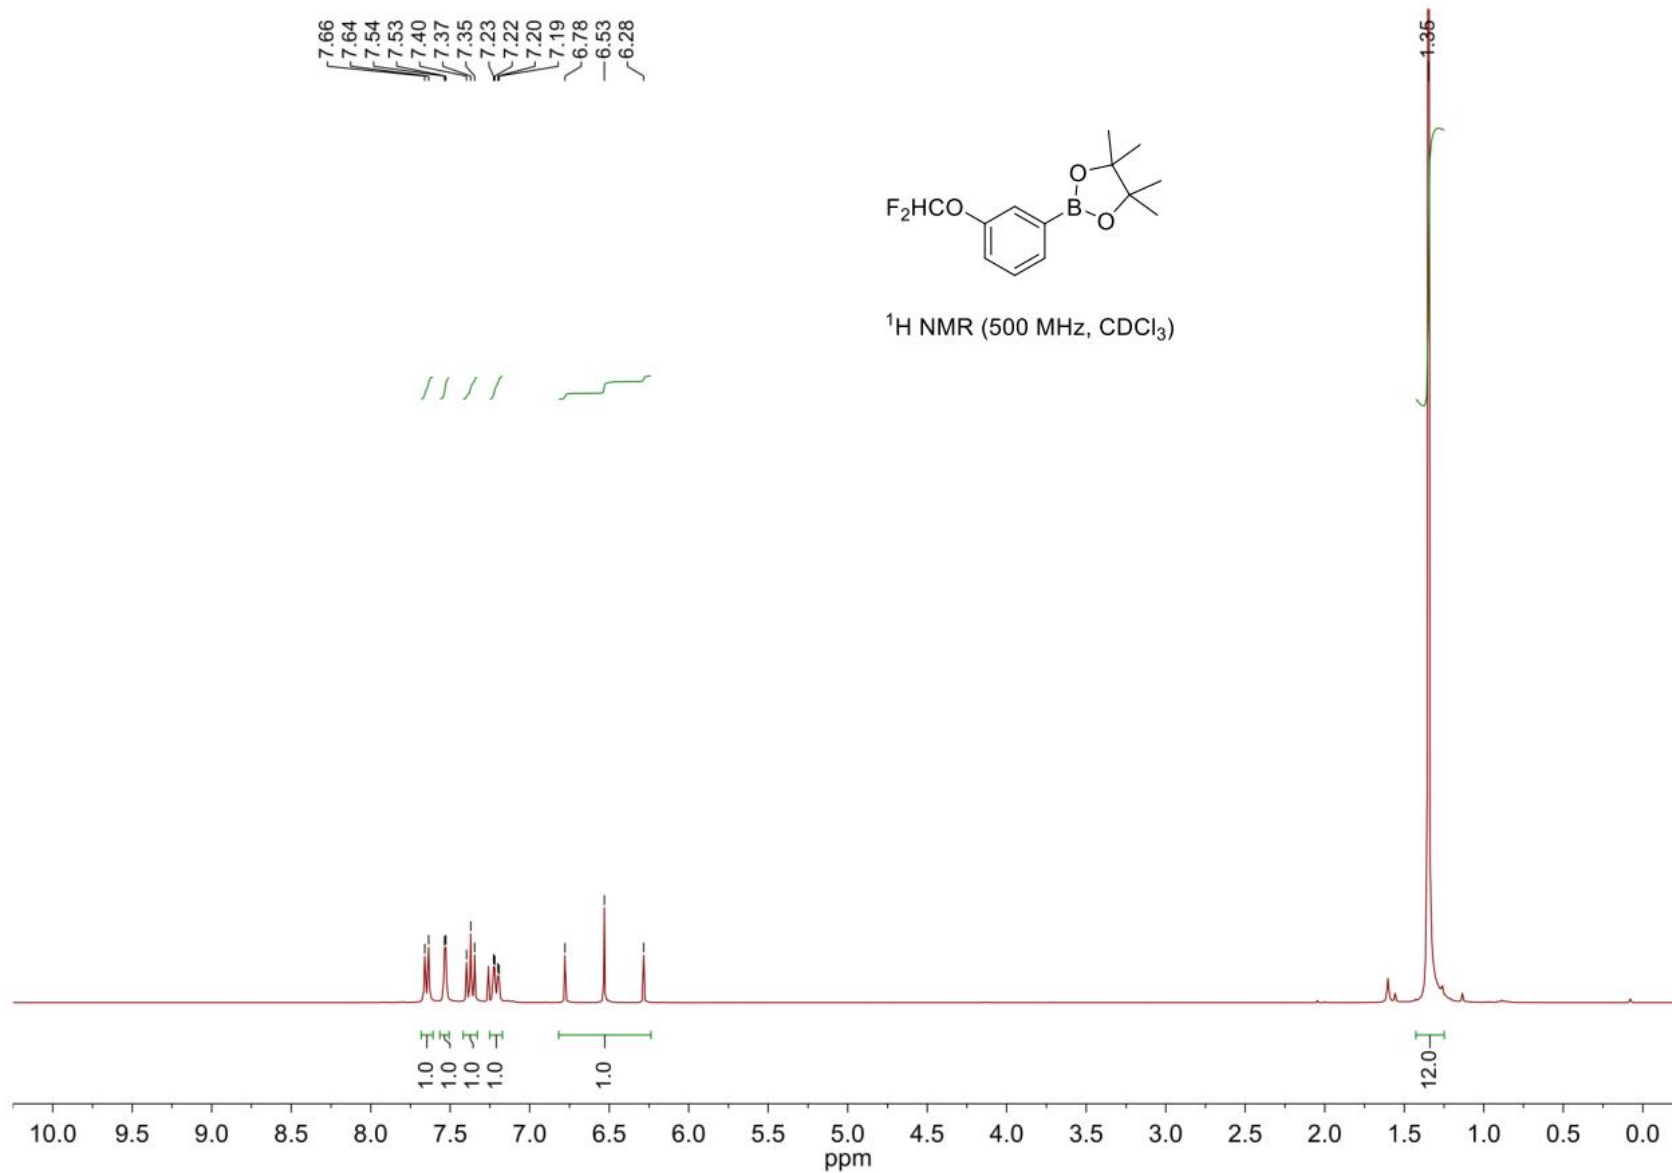

S387

2-(3-(Difluoromethoxy)phenyl)-4,4,5,5-tetramethyl-1,3,2-dioxaborolane (57)

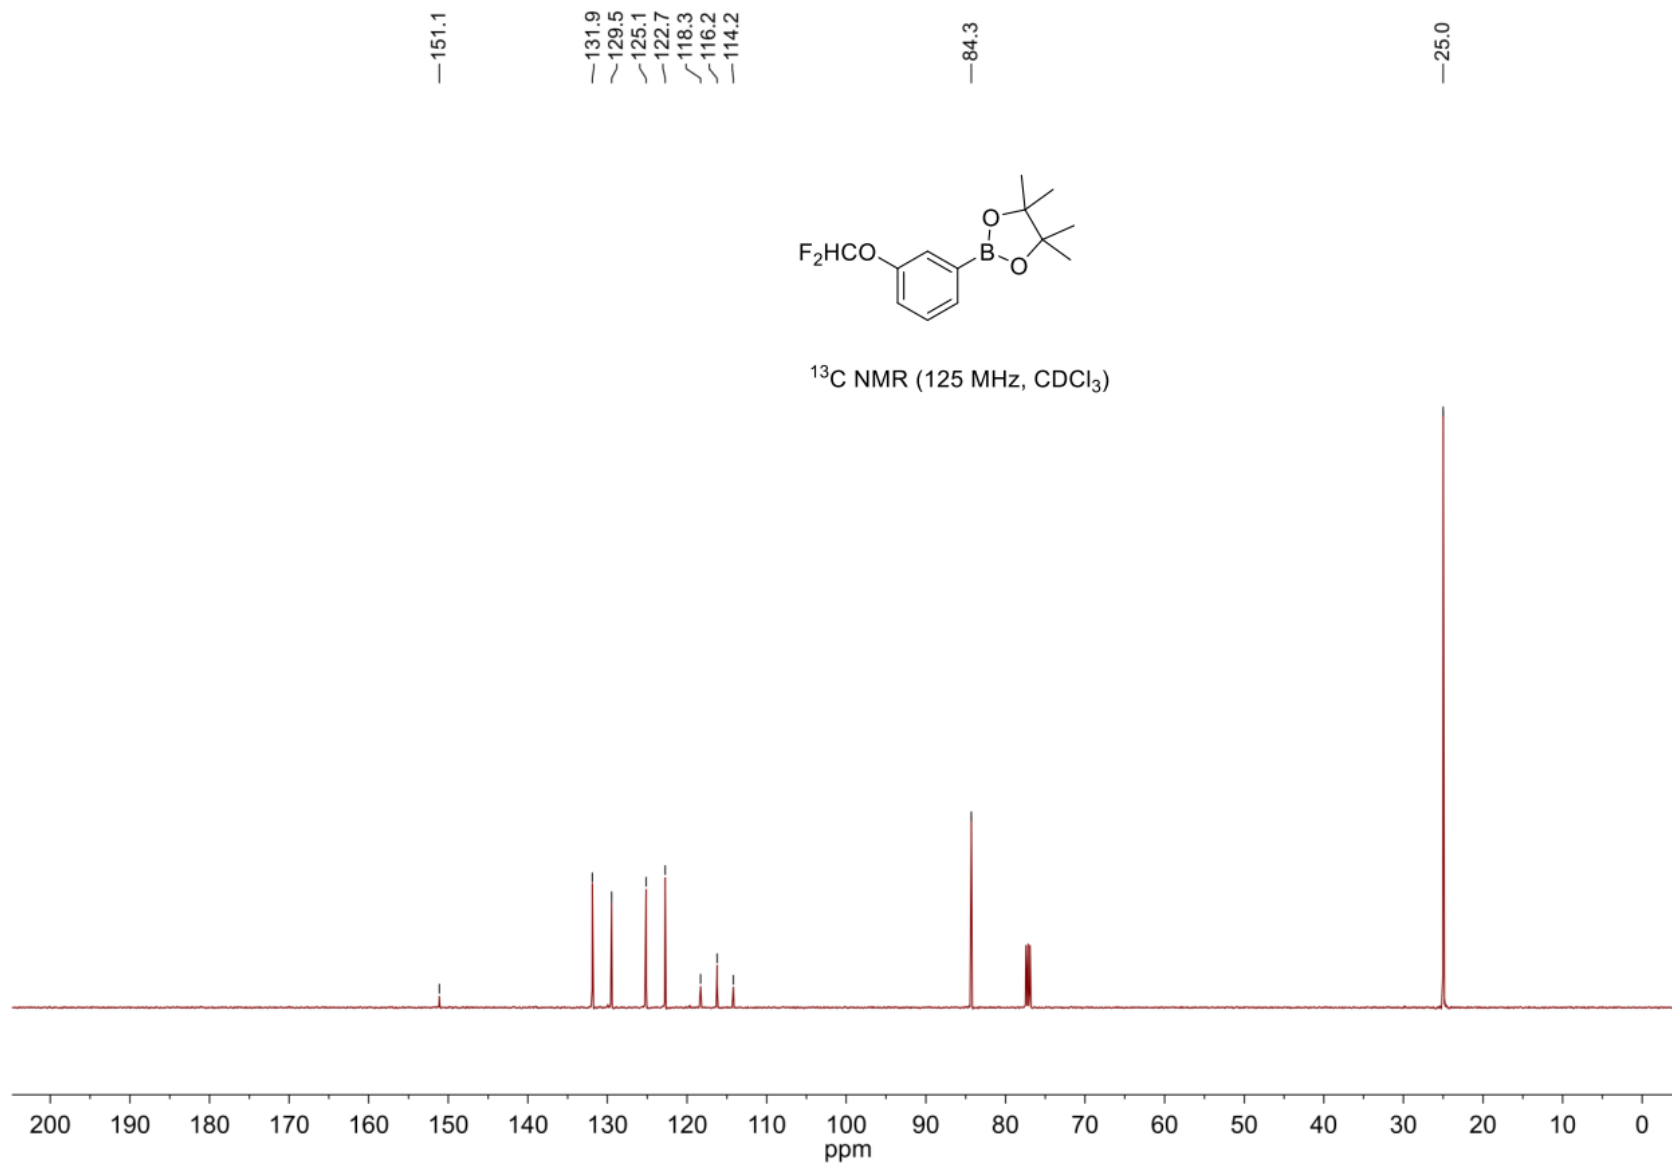

2-(3-Chlorophenyl)-4,4,5,5-tetramethyl-1,3,2-dioxaborolane (58)

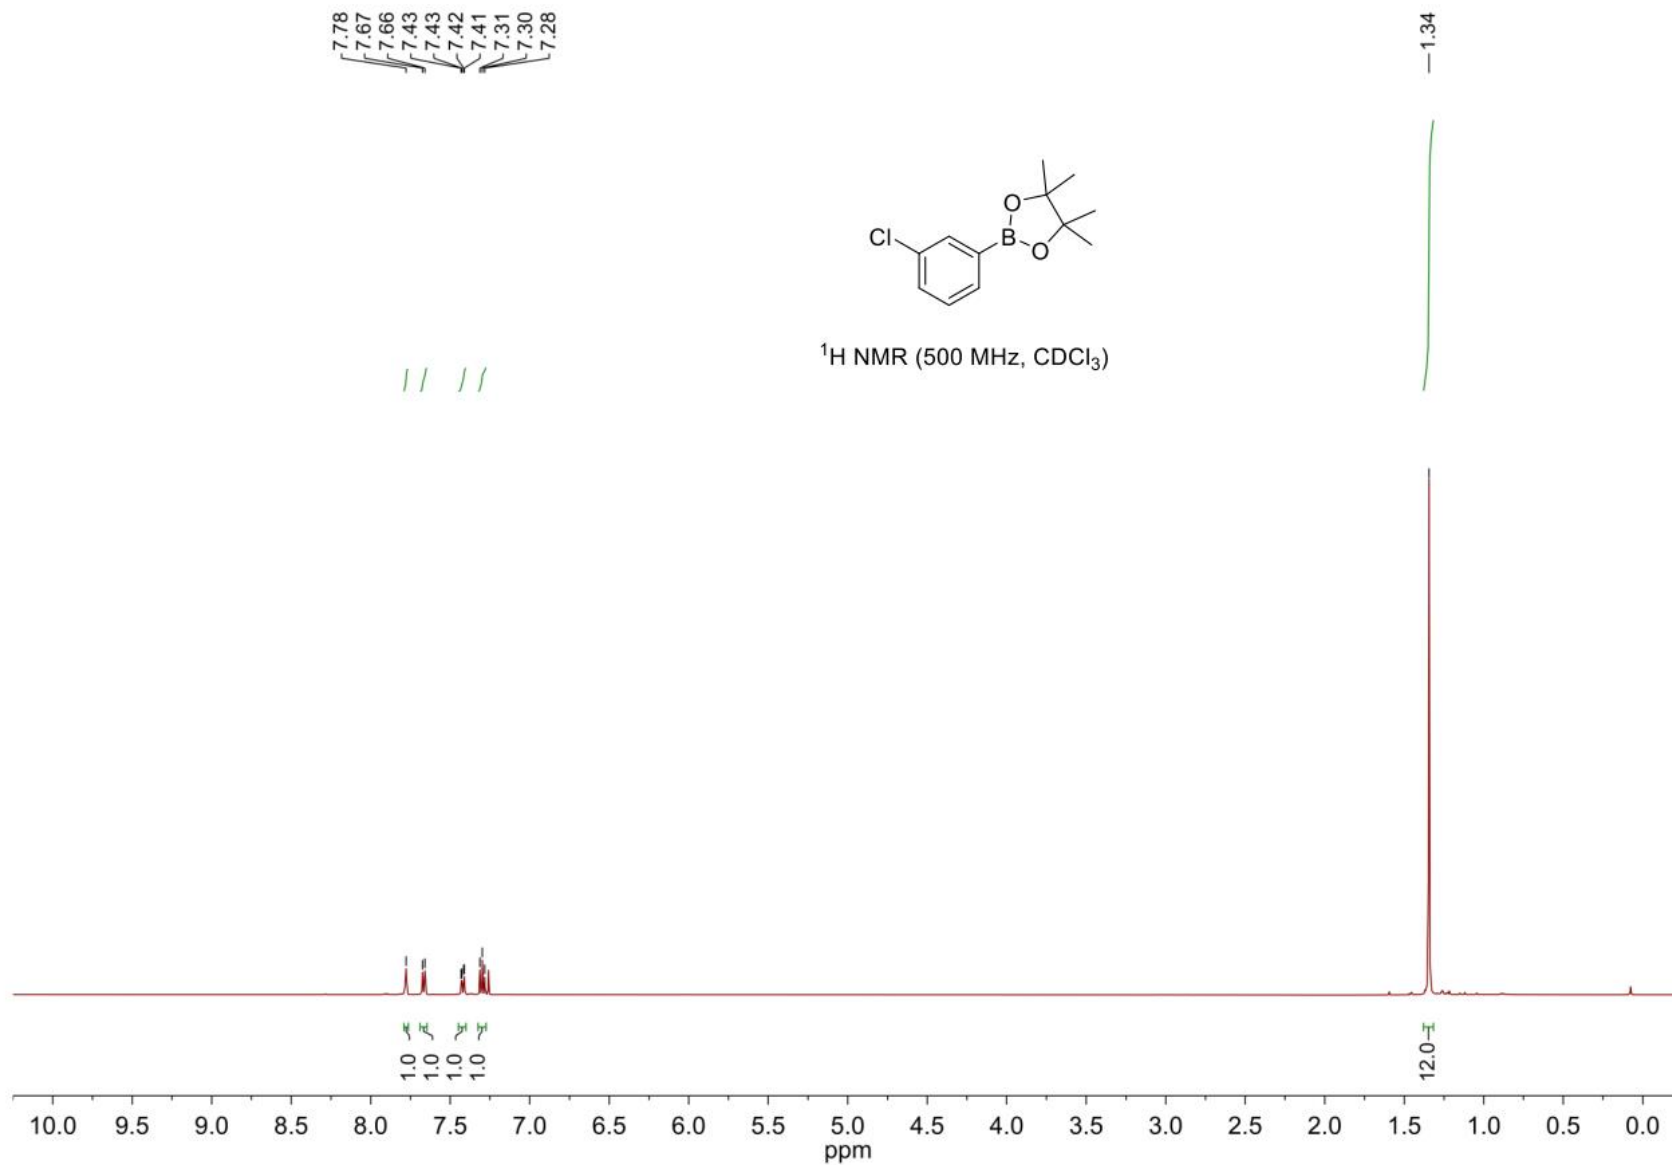

## 2-(3-Chlorophenyl)-4,4,5,5-tetramethyl-1,3,2-dioxaborolane (58)

134.7  
134.2  
132.8  
131.4  
129.3

84.3

25.0

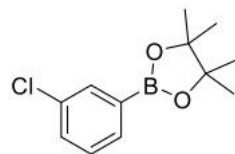

$^{13}\text{C}$  NMR (125 MHz,  $\text{CDCl}_3$ )

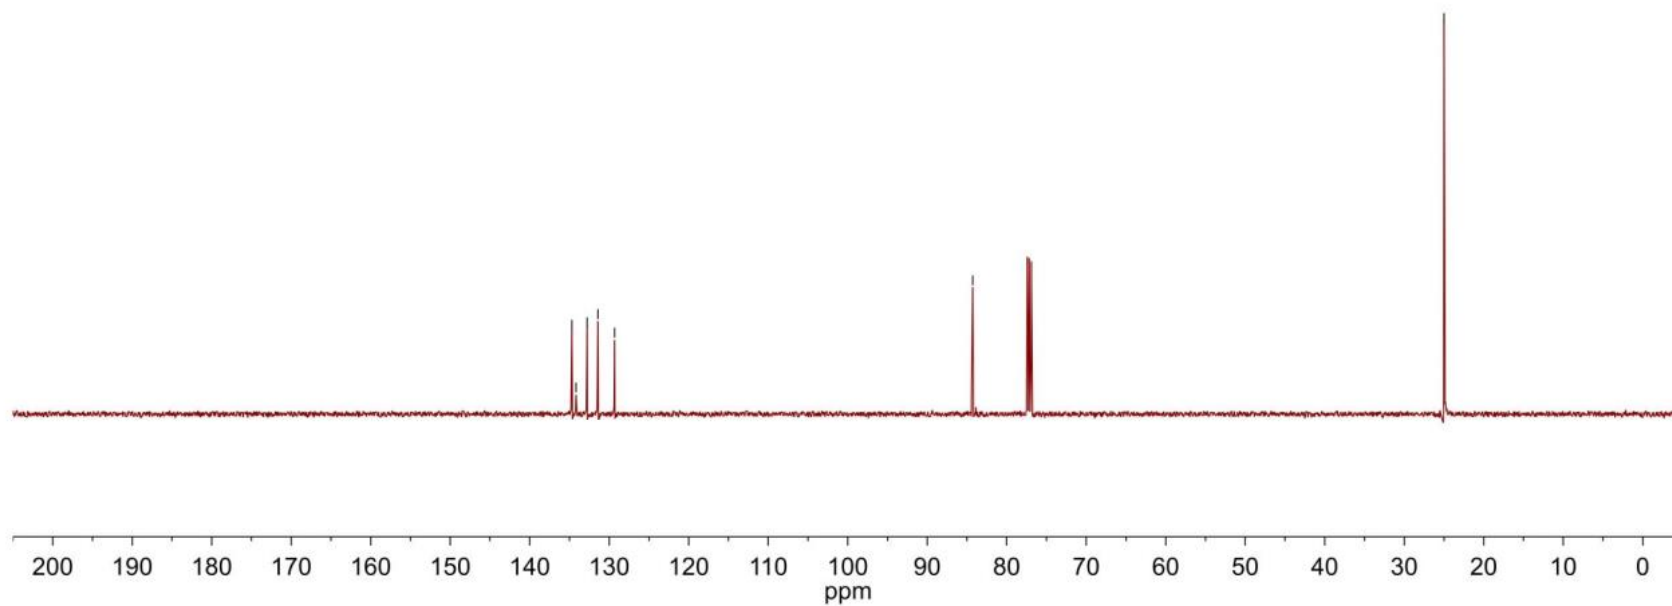

S390

2-(3,4-Dimethoxyphenyl)-4,4,5,5-tetramethyl-1,3,2-dioxaborolane (59)

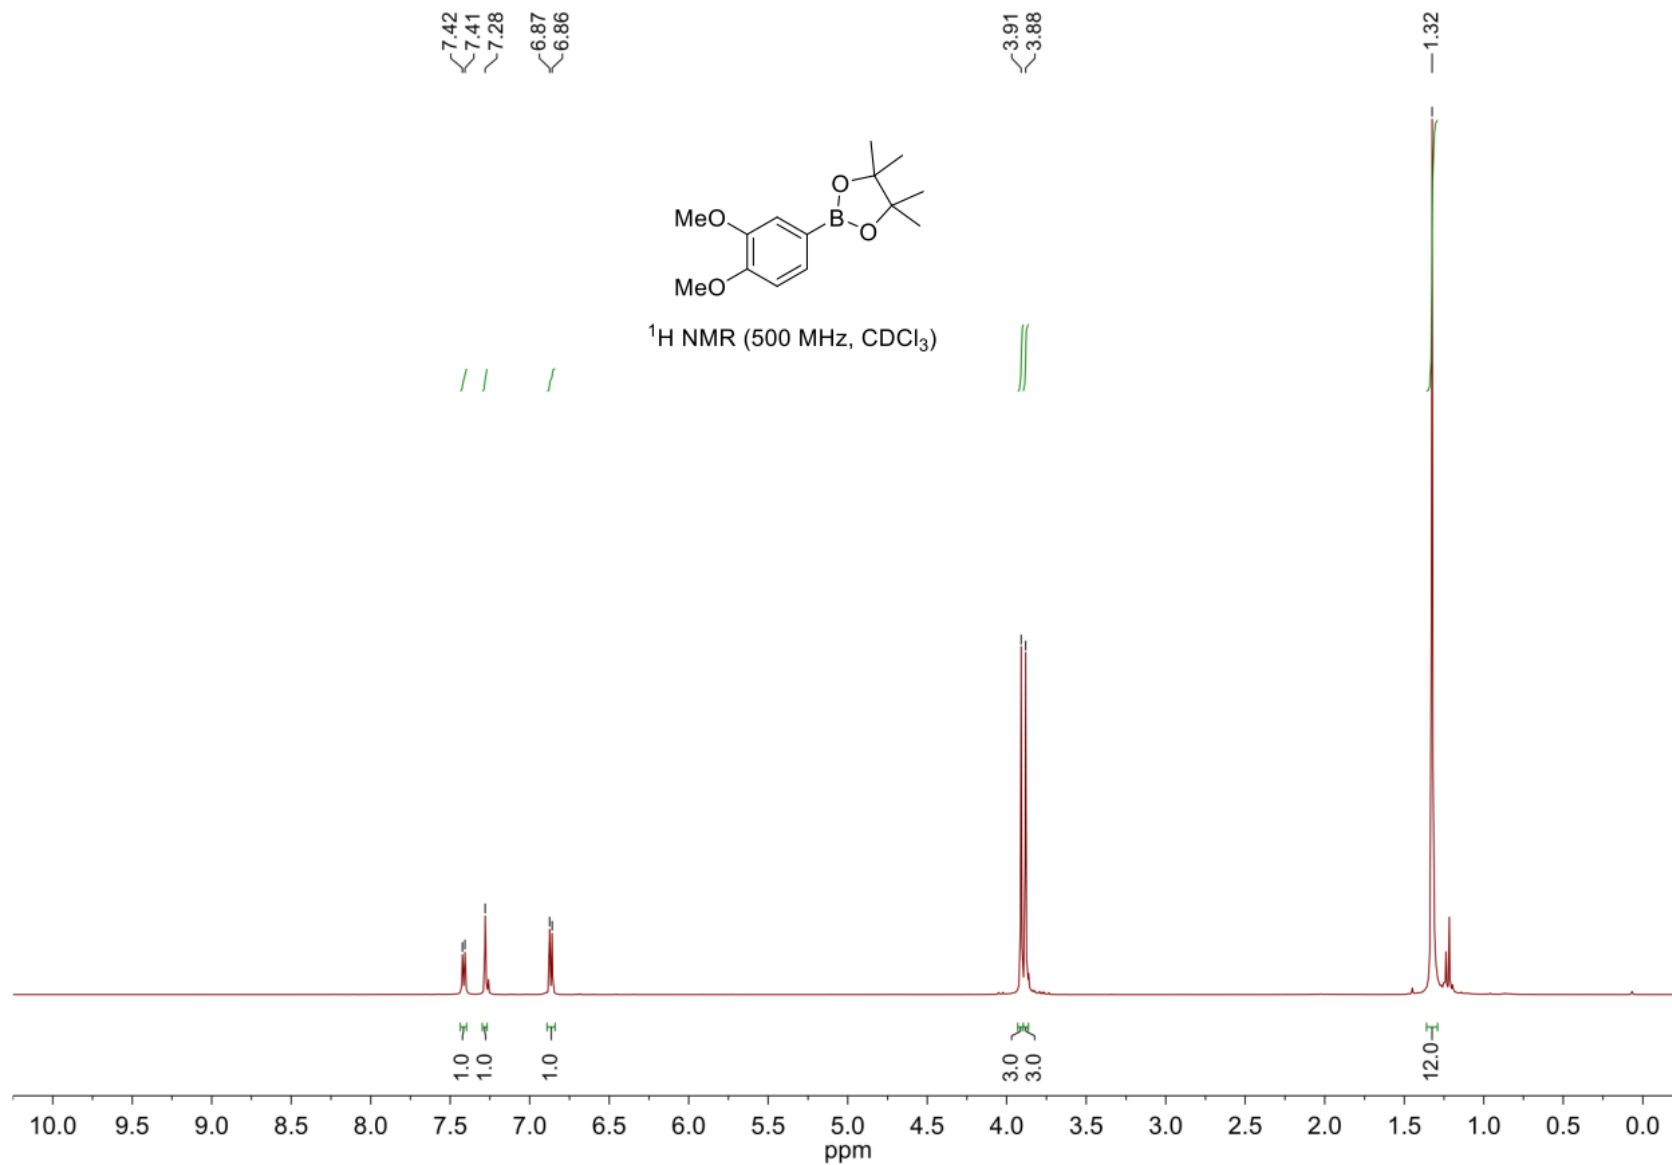

## 2-(3,4-Dimethoxyphenyl)-4,4,5,5-tetramethyl-1,3,2-dioxaborolane (59)

—151.7  
—148.4

—128.6

—116.7

—110.6

—83.7

—55.9  
—55.8

—24.9

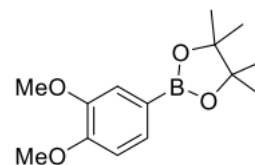

$^{13}\text{C}$  NMR (125 MHz,  $\text{CDCl}_3$ )

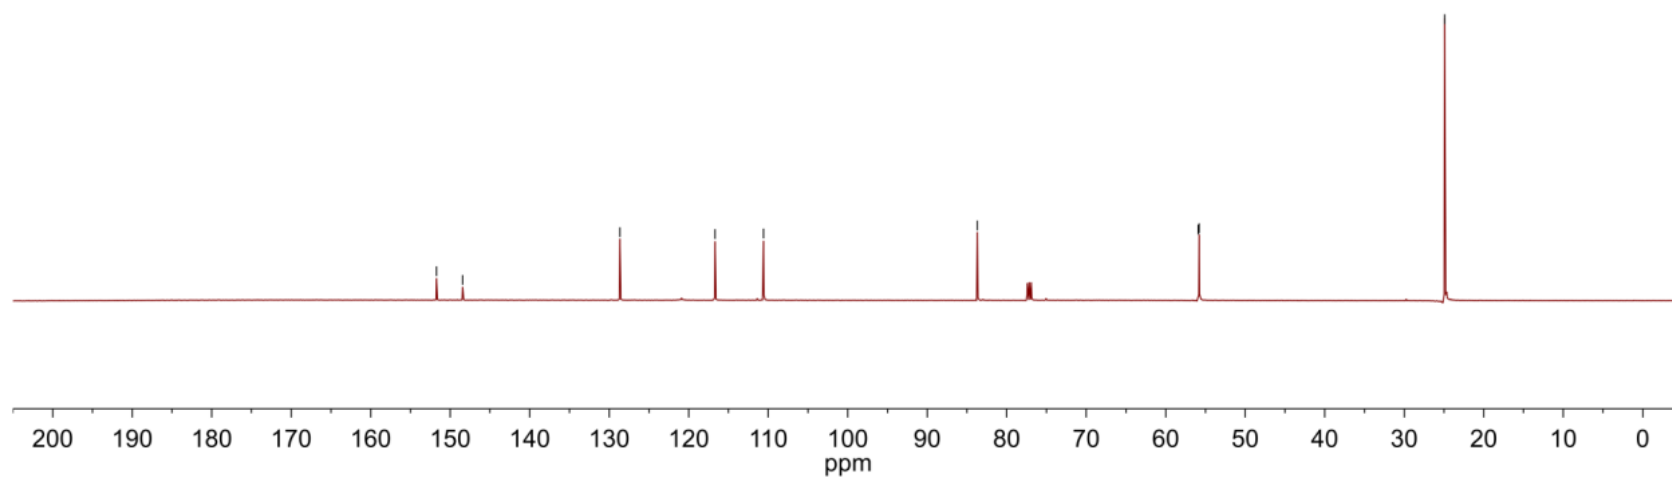

S392



4,4,5,5-Tetramethyl-2-(4-(methylthio)phenyl)-1,3,2-dioxaborolane (60)

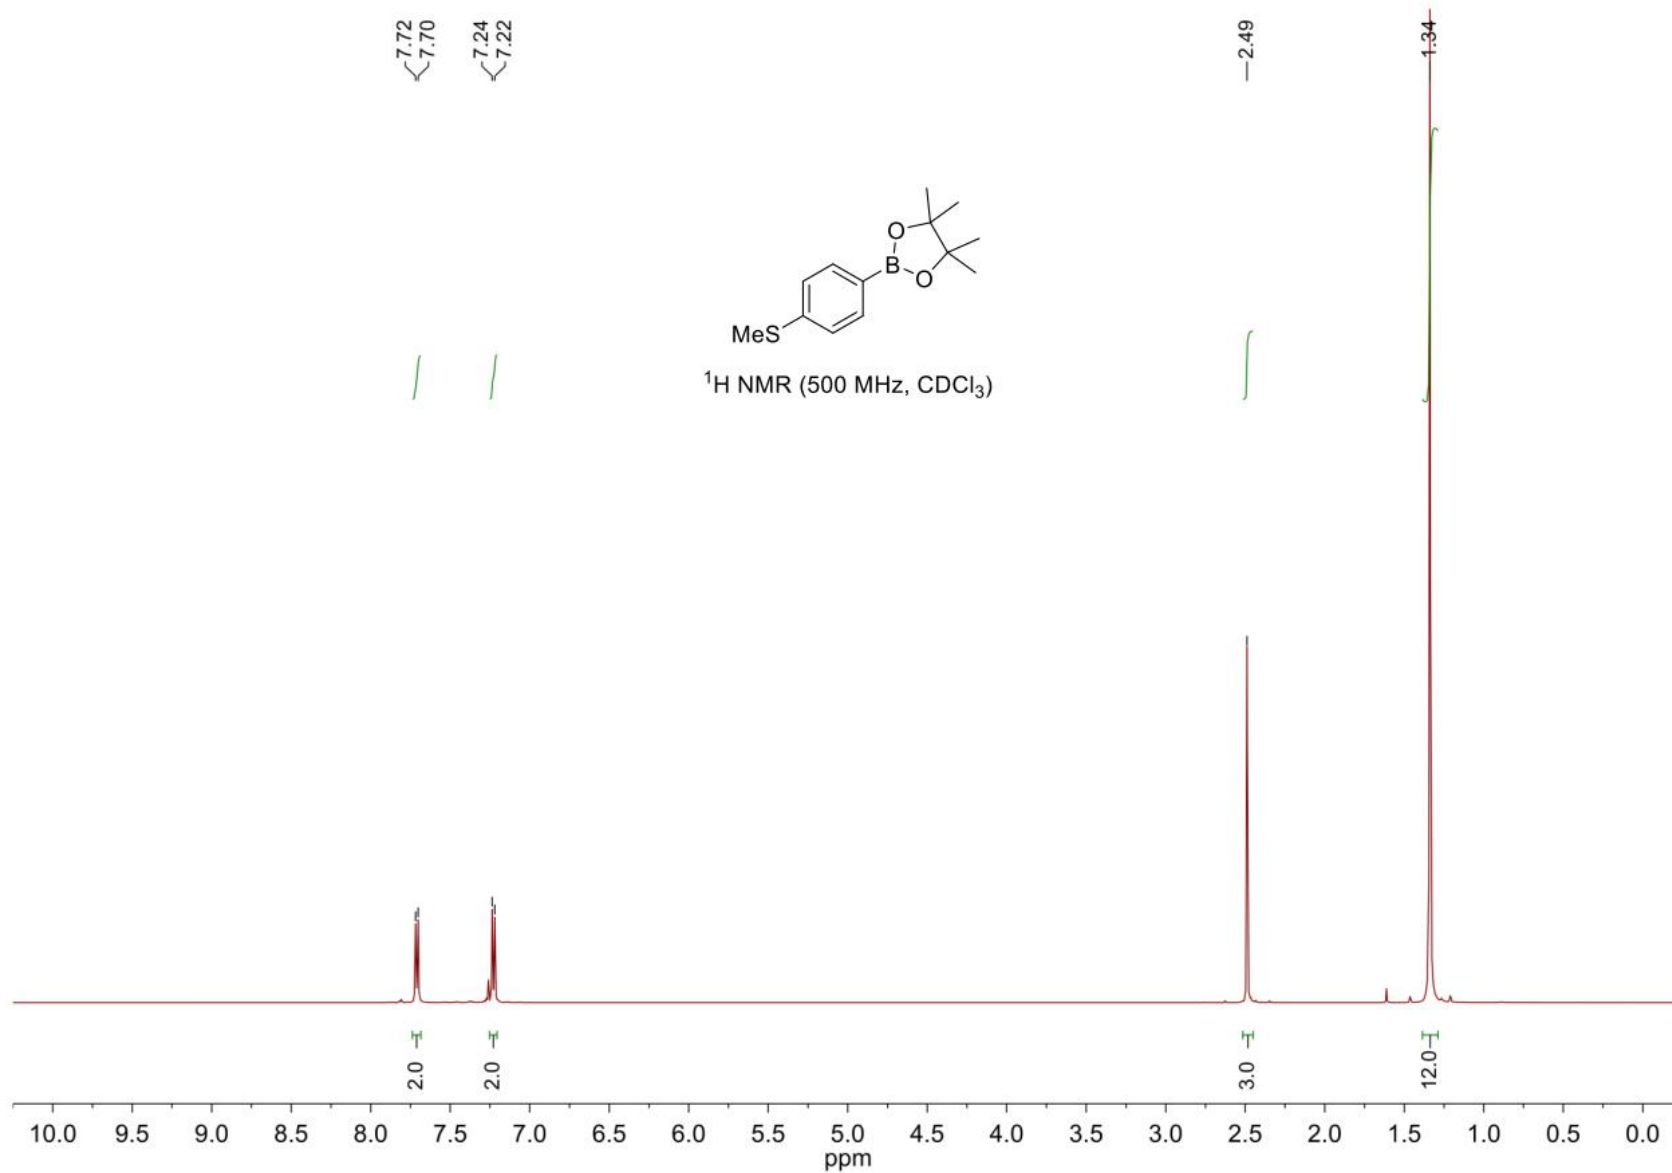

# 4,4,5,5-Tetramethyl-2-(4-(methylthio)phenyl)-1,3,2-dioxaborolane (60)

—142.7  
—135.2  
—125.1  
  
—83.9  
  
—25.0  
—15.2

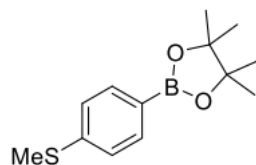

$^{13}\text{C}$  NMR (125 MHz,  $\text{CDCl}_3$ )

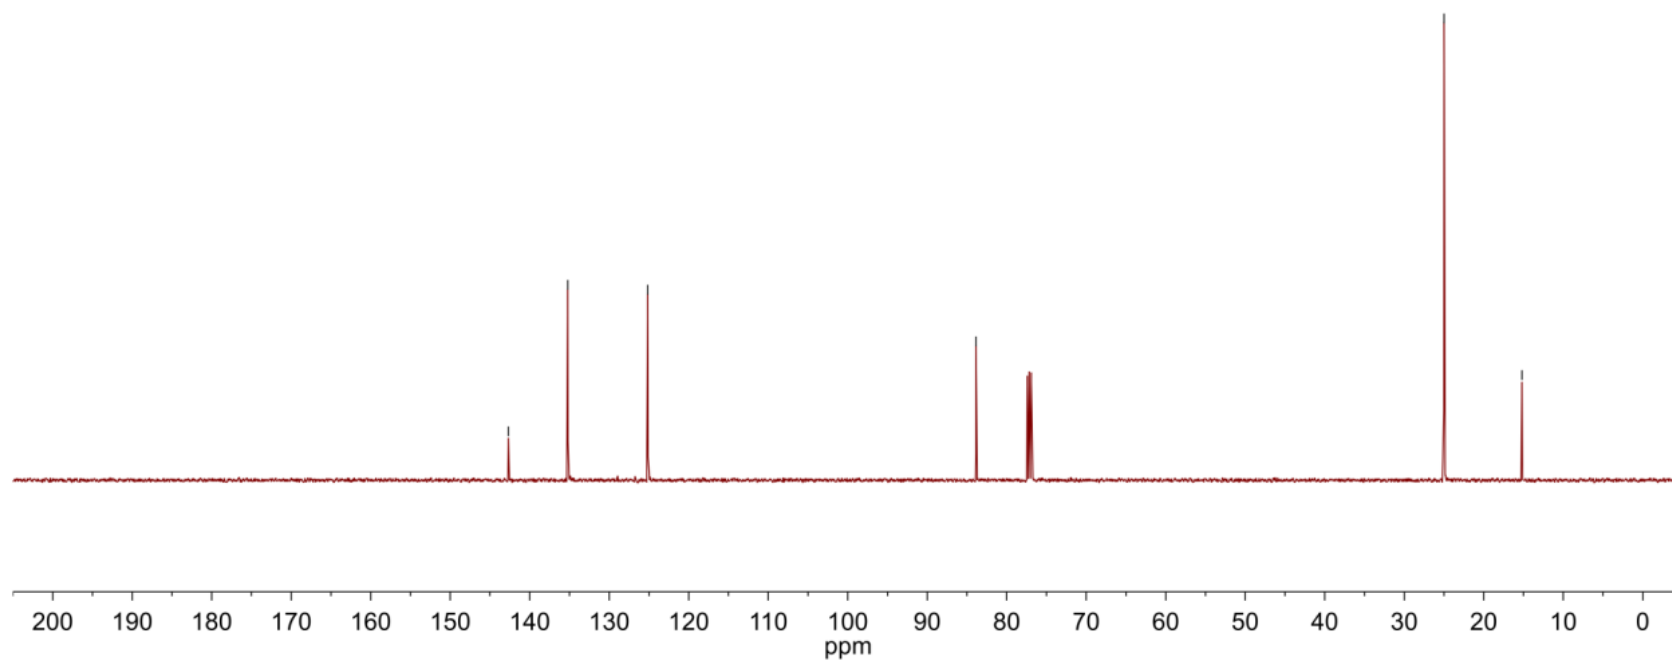

4-(4,4,5,5-Tetramethyl-1,3,2-dioxaborolan-2-yl)aniline (61)

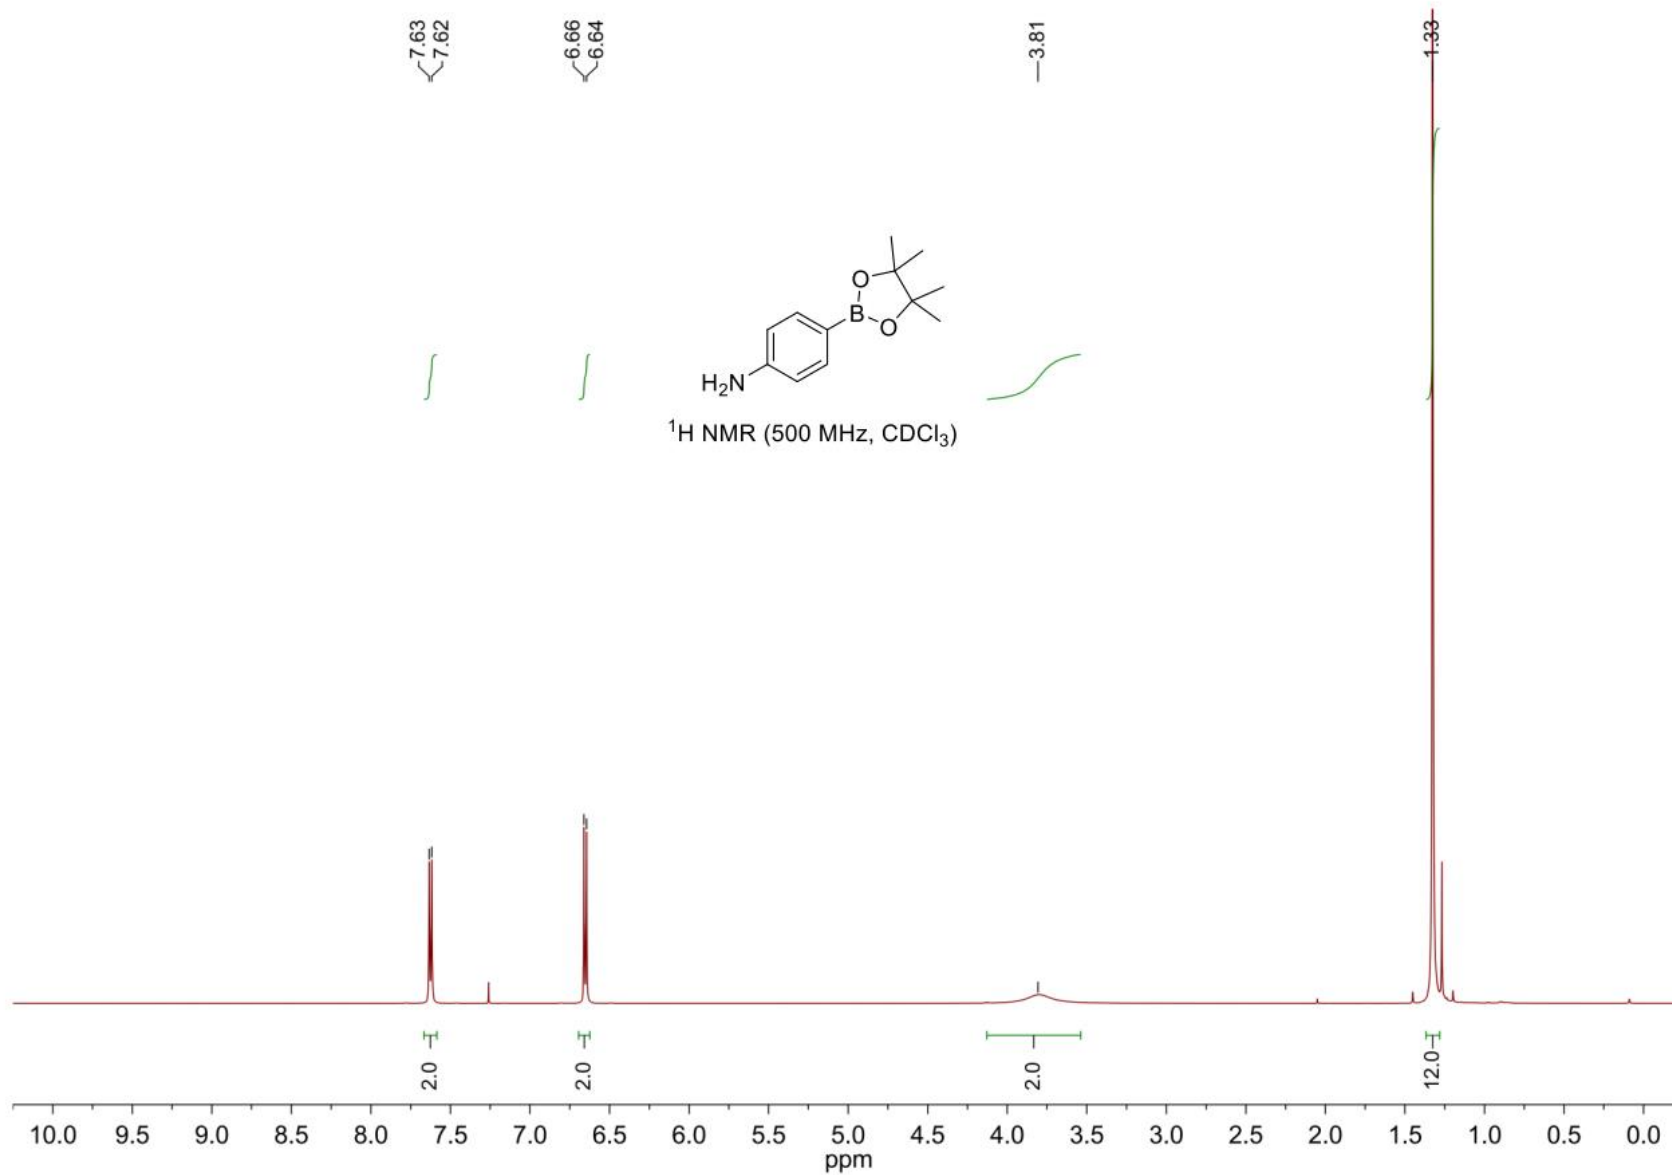

S395

4-(4,4,5,5-Tetramethyl-1,3,2-dioxaborolan-2-yl)aniline (61)

—149.4      —136.5      —114.2      —83.4      —24.9

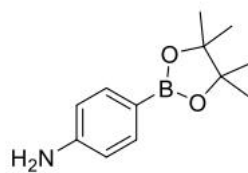

<sup>13</sup>C NMR (125 MHz, CDCl<sub>3</sub>)

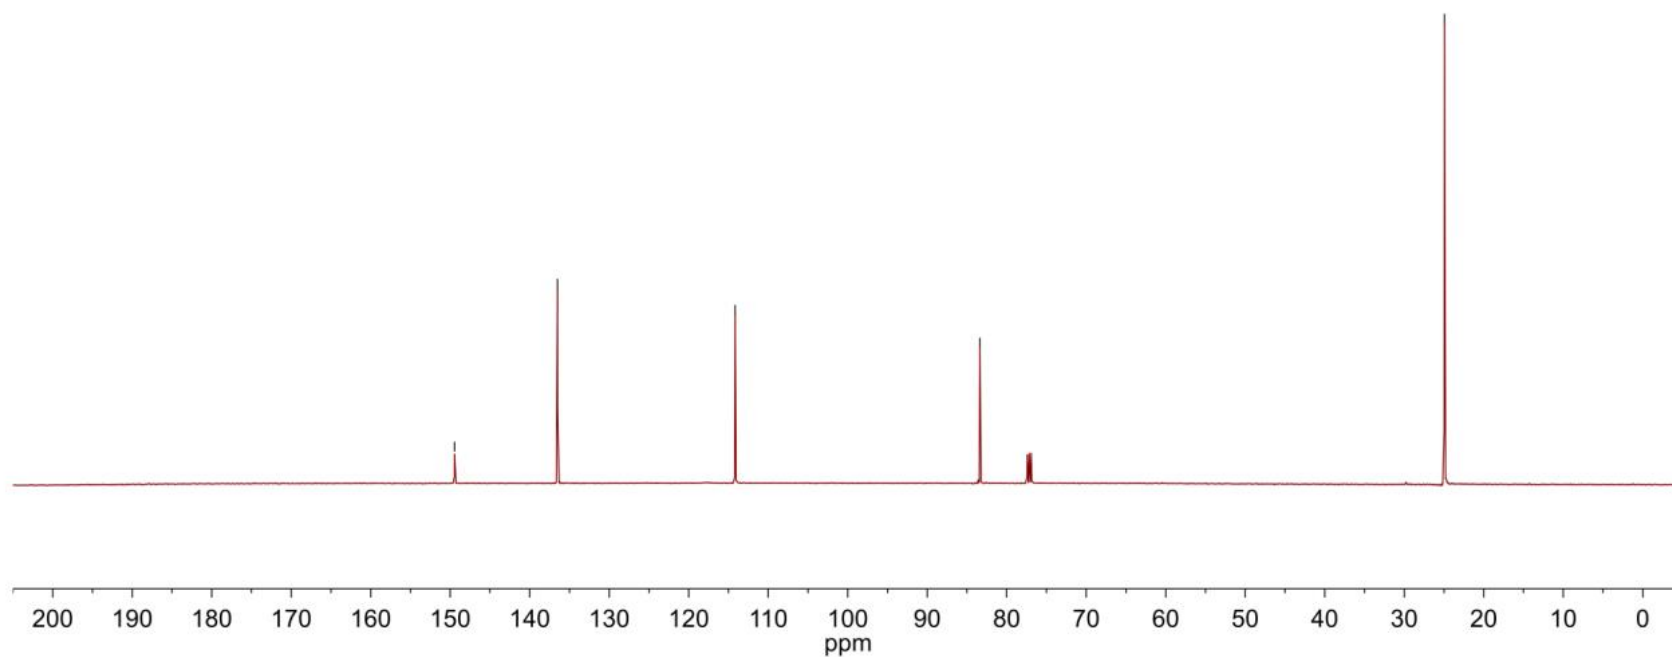

3-(4,4,5,5-Tetramethyl-1,3,2-dioxaborolan-2-yl)aniline (62)

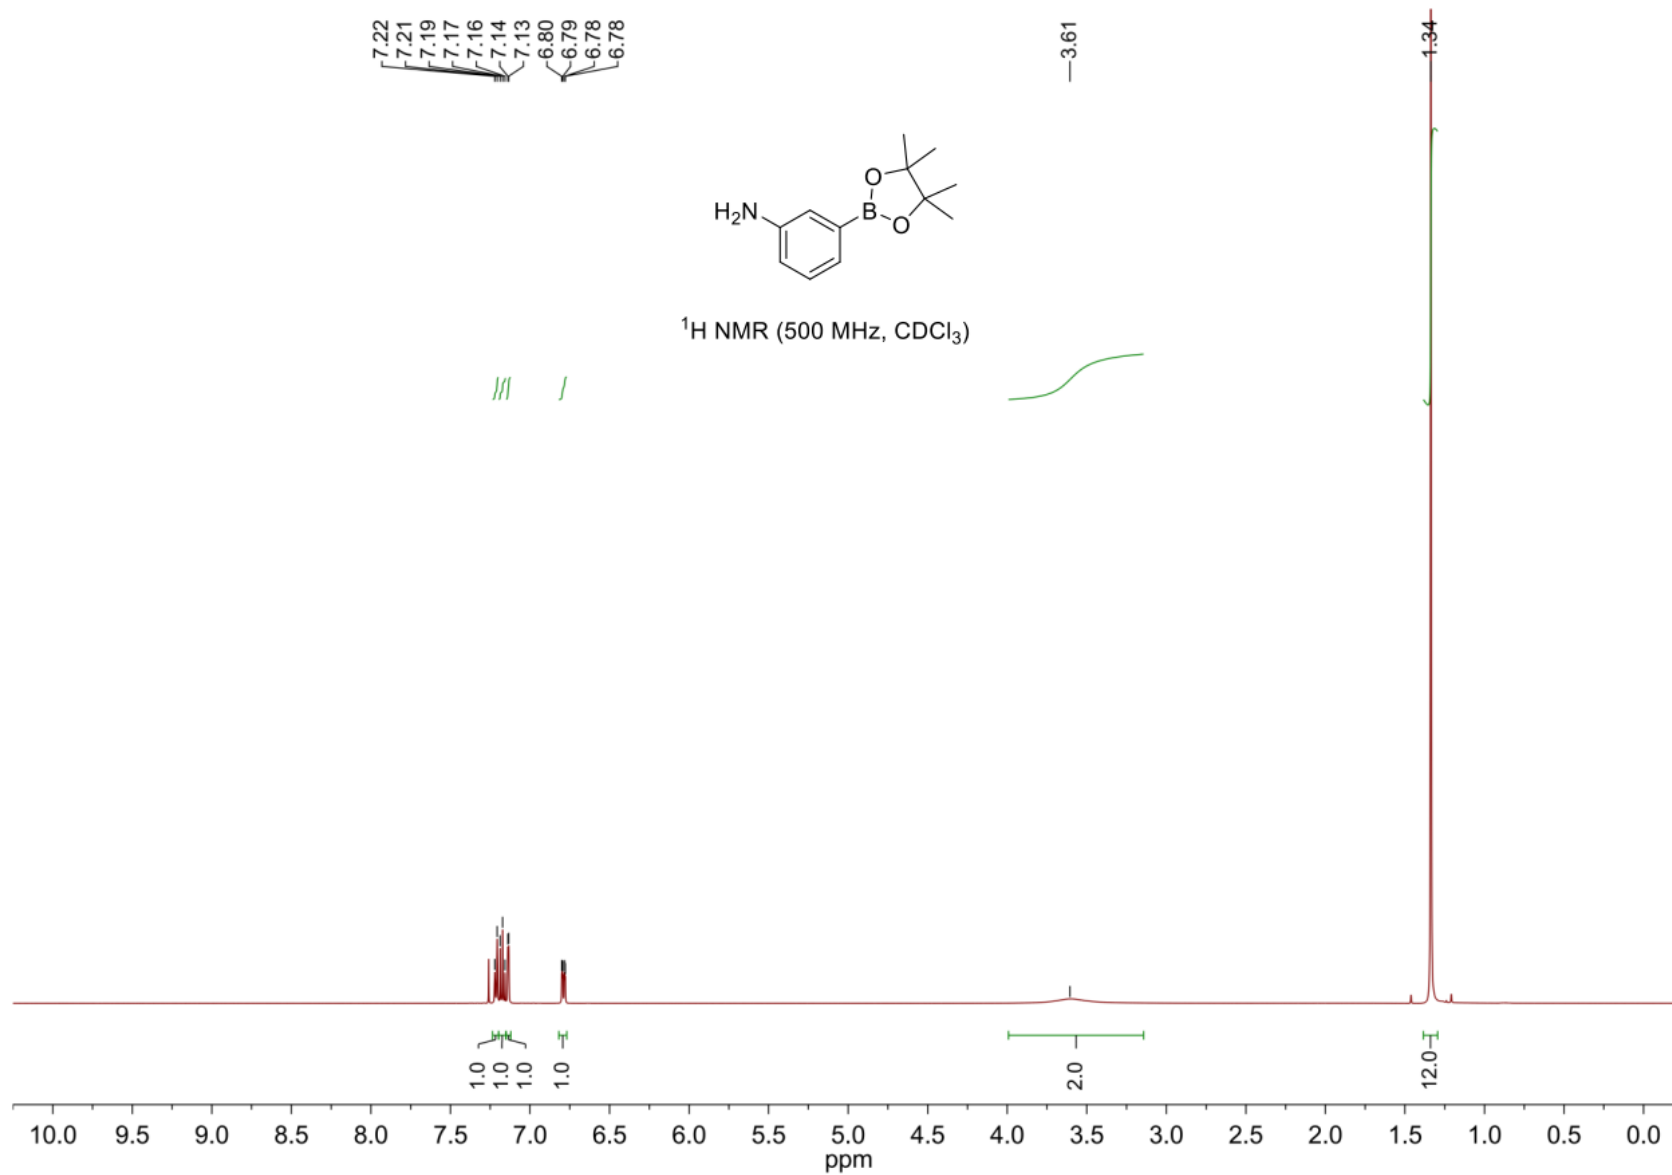

### 3-(4,4,5,5-Tetramethyl-1,3,2-dioxaborolan-2-yl)aniline (62)

—145.9  
~128.9  
~125.1  
~121.3  
~118.2  
—83.8  
—25.0

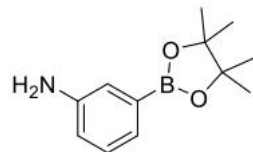

$^{13}\text{C}$  NMR (125 MHz,  $\text{CDCl}_3$ )

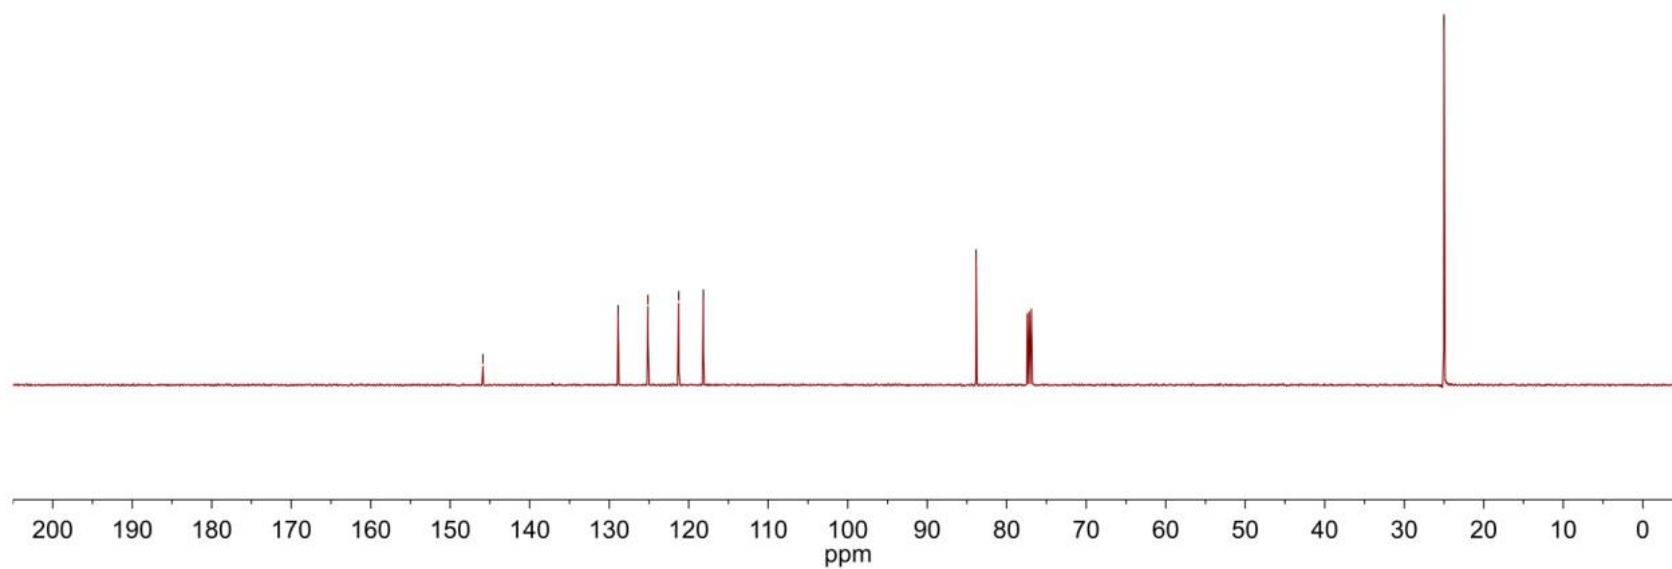

S398

## 2-Methyl-5-(4,4,5,5-tetramethyl-1,3,2-dioxaborolan-2-yl)aniline (63)

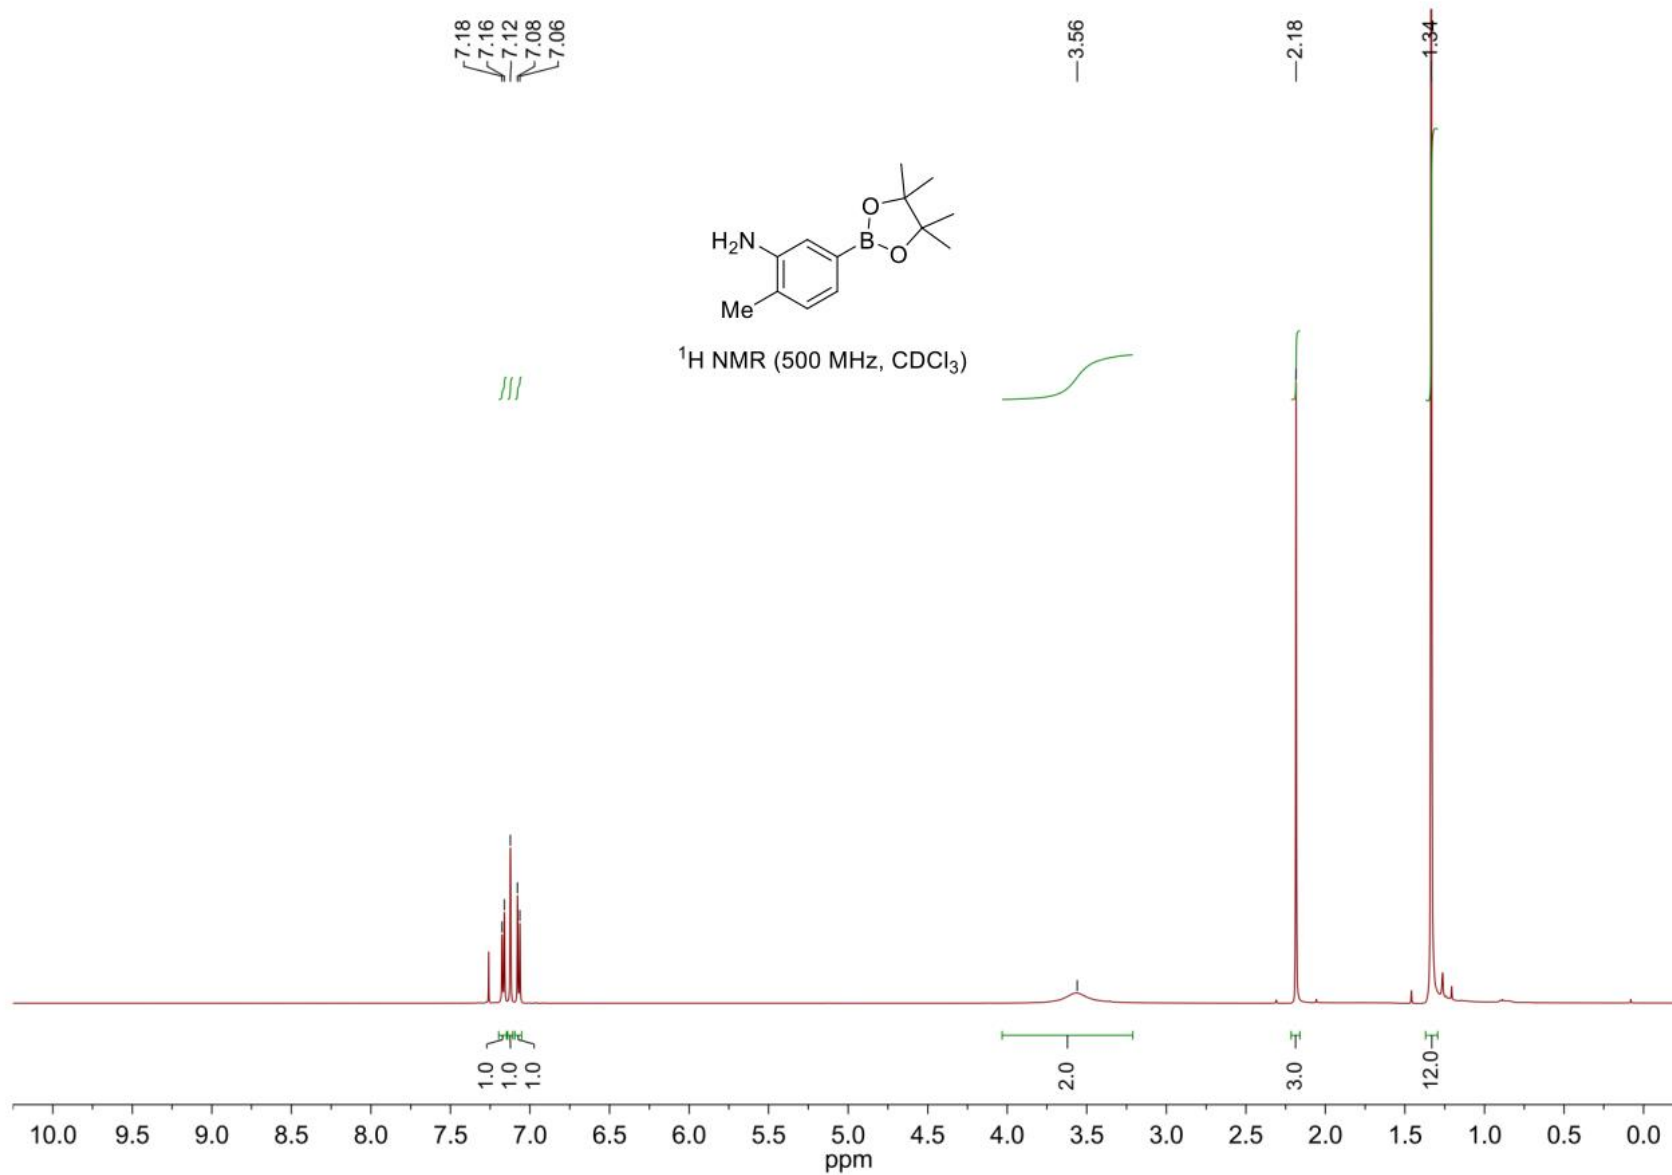

## 2-Methyl-5-(4,4,5,5-tetramethyl-1,3,2-dioxaborolan-2-yl)aniline (63)

—144.2  
—130.1  
—126.0  
—125.4  
—121.2  
  
—83.7  
  
—25.0  
—17.7

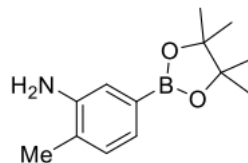

$^{13}\text{C}$  NMR (125 MHz,  $\text{CDCl}_3$ )

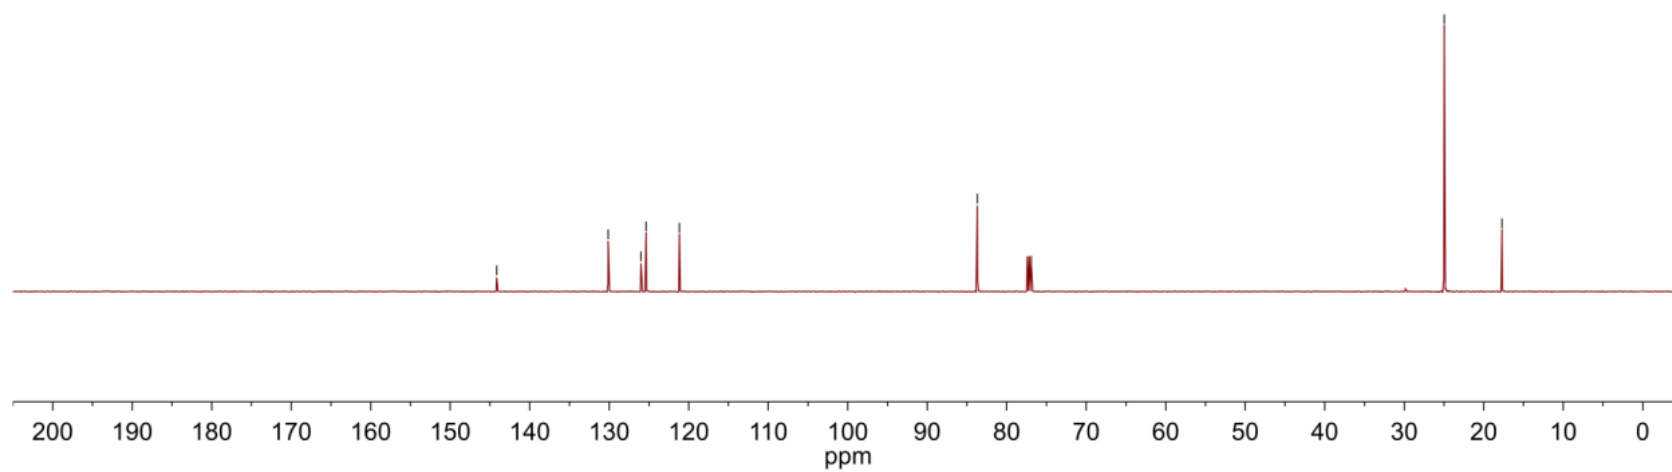

S400



***N*-(4-(trifluoro- $\lambda^4$ -boraneyl)phenyl)acetamide, potassium salt (64)**

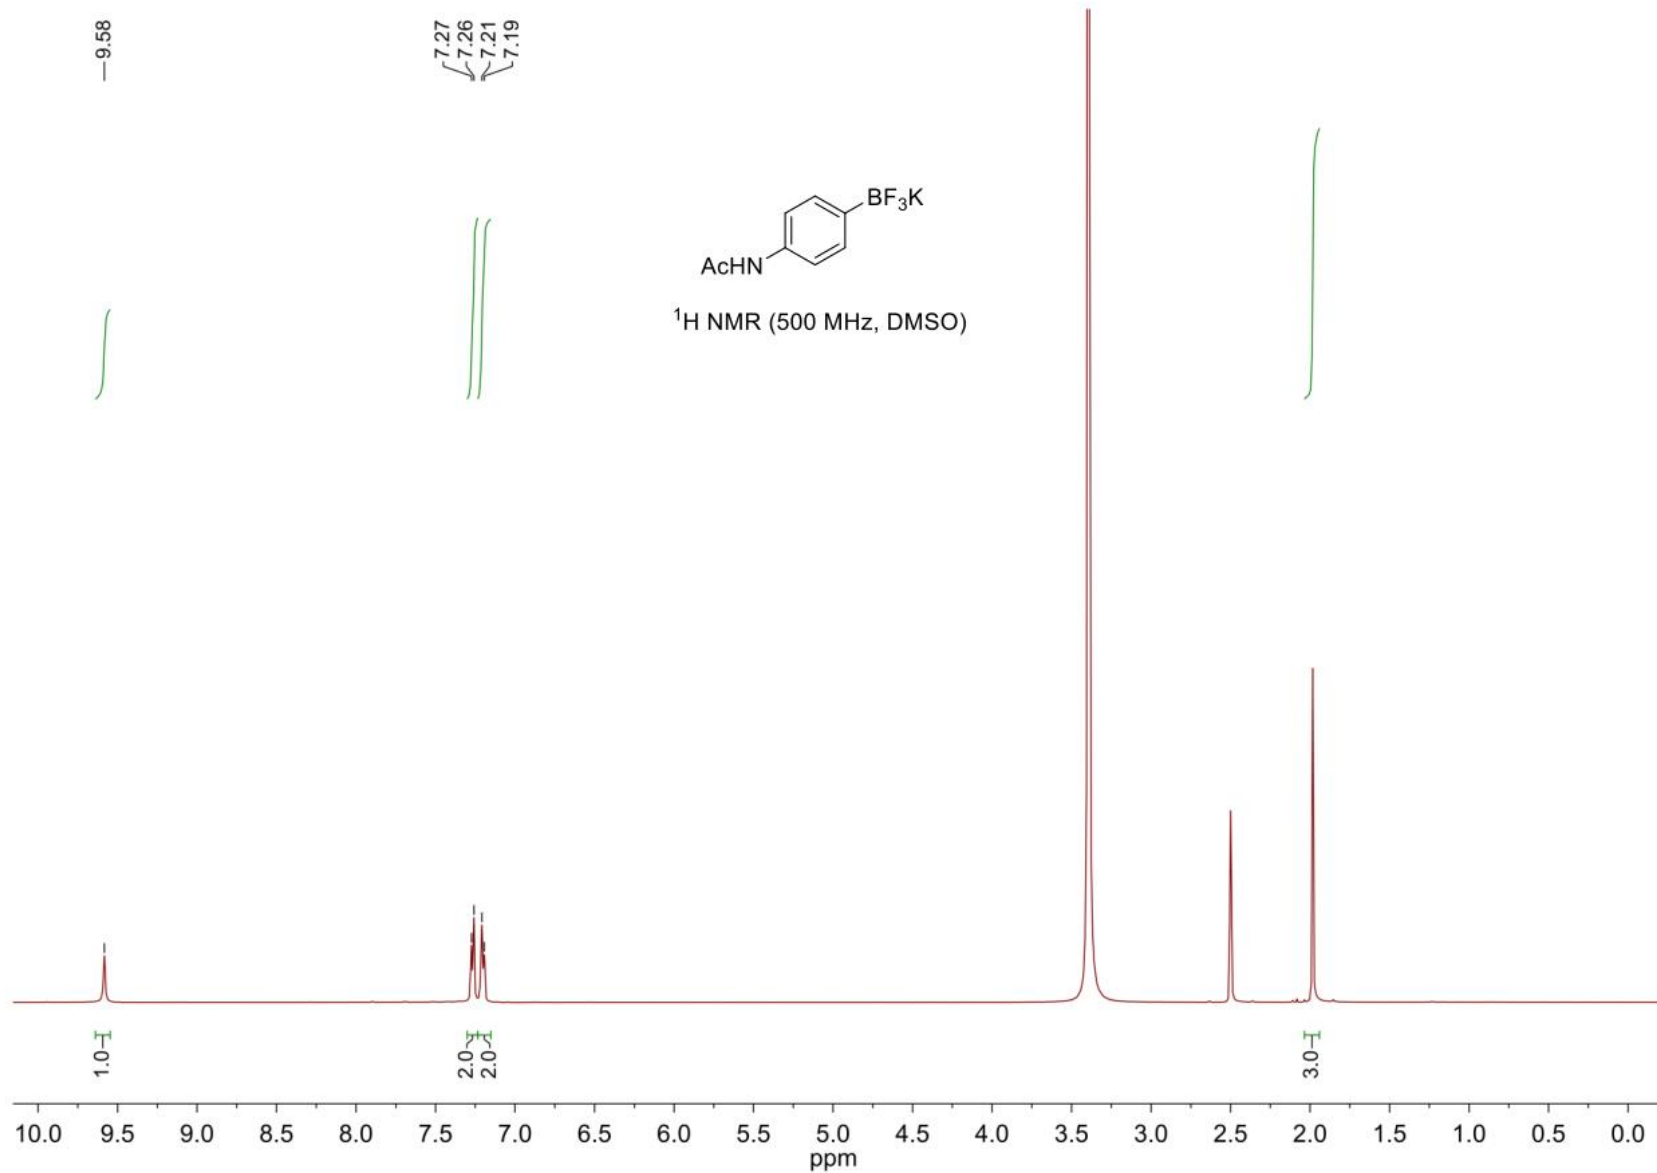

***N*-(4-(trifluoro- $\lambda^4$ -boraneyl)phenyl)acetamide, potassium salt (64)**

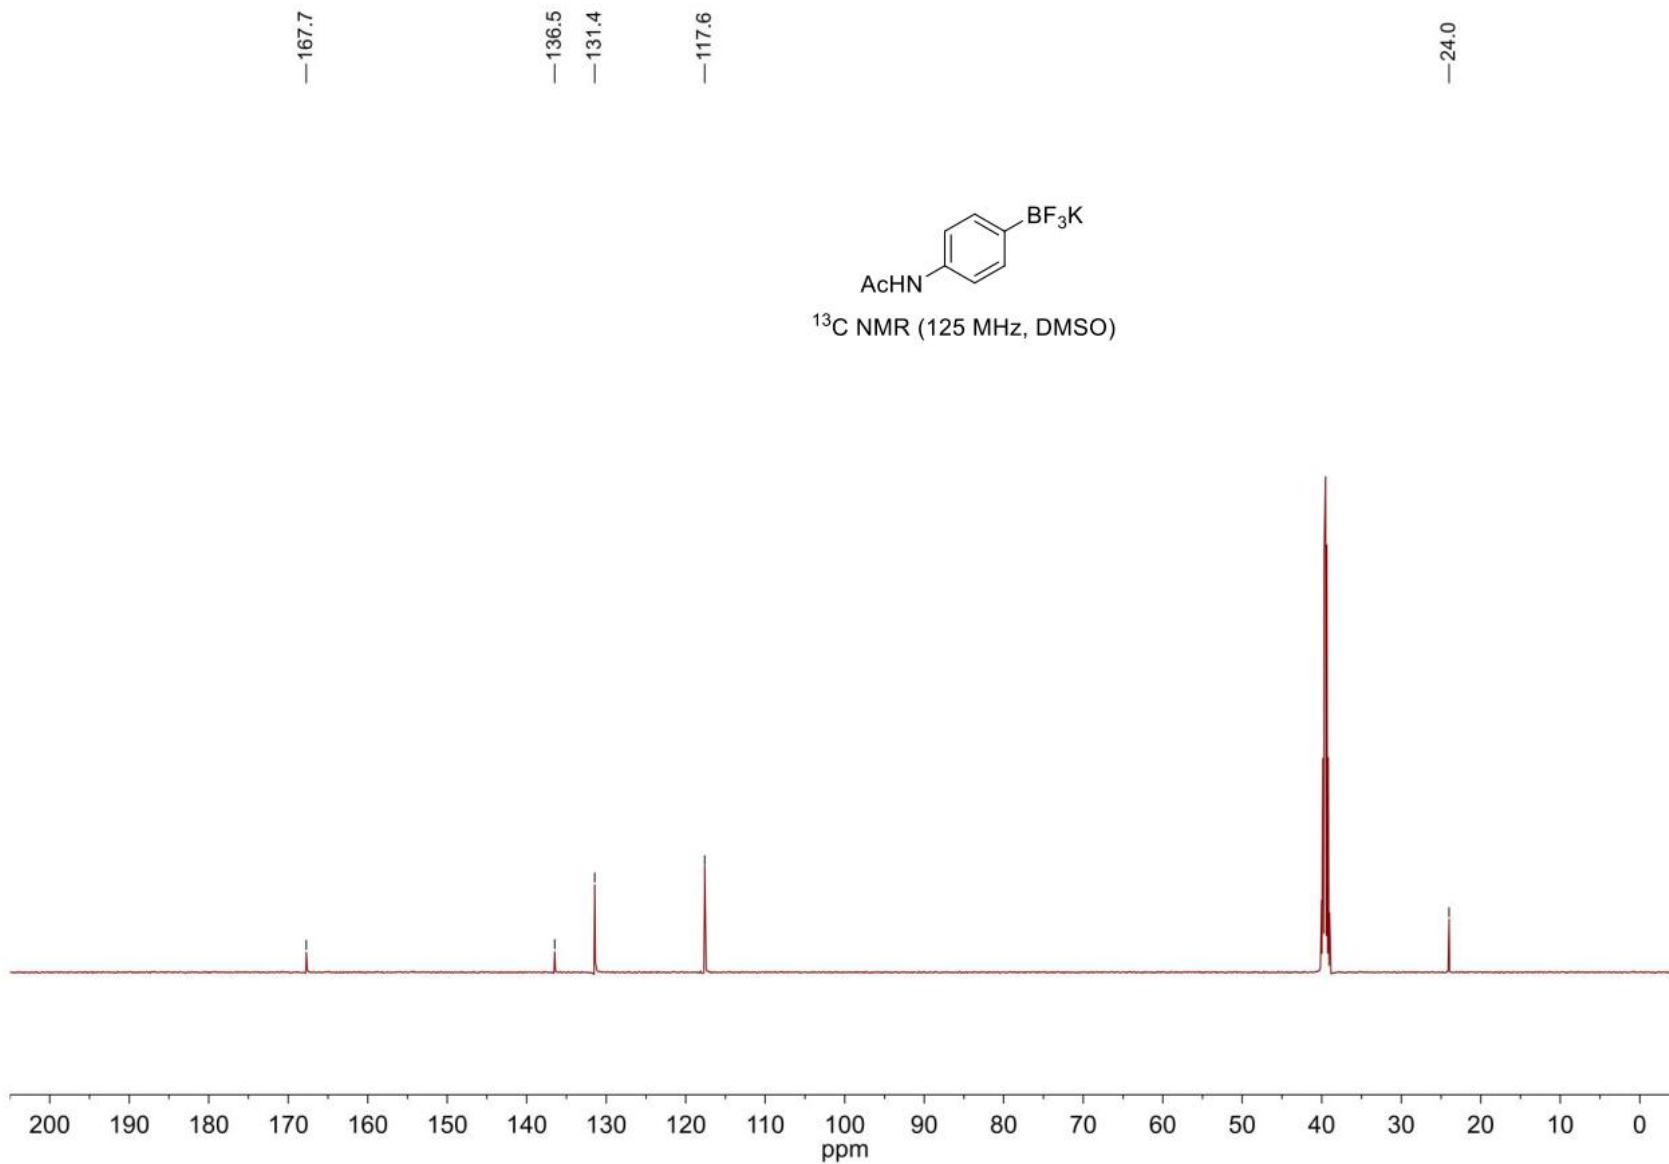

# Methyl 3-(4,4,5,5-tetramethyl-1,3,2-dioxaborolan-2-yl)benzoate (65)

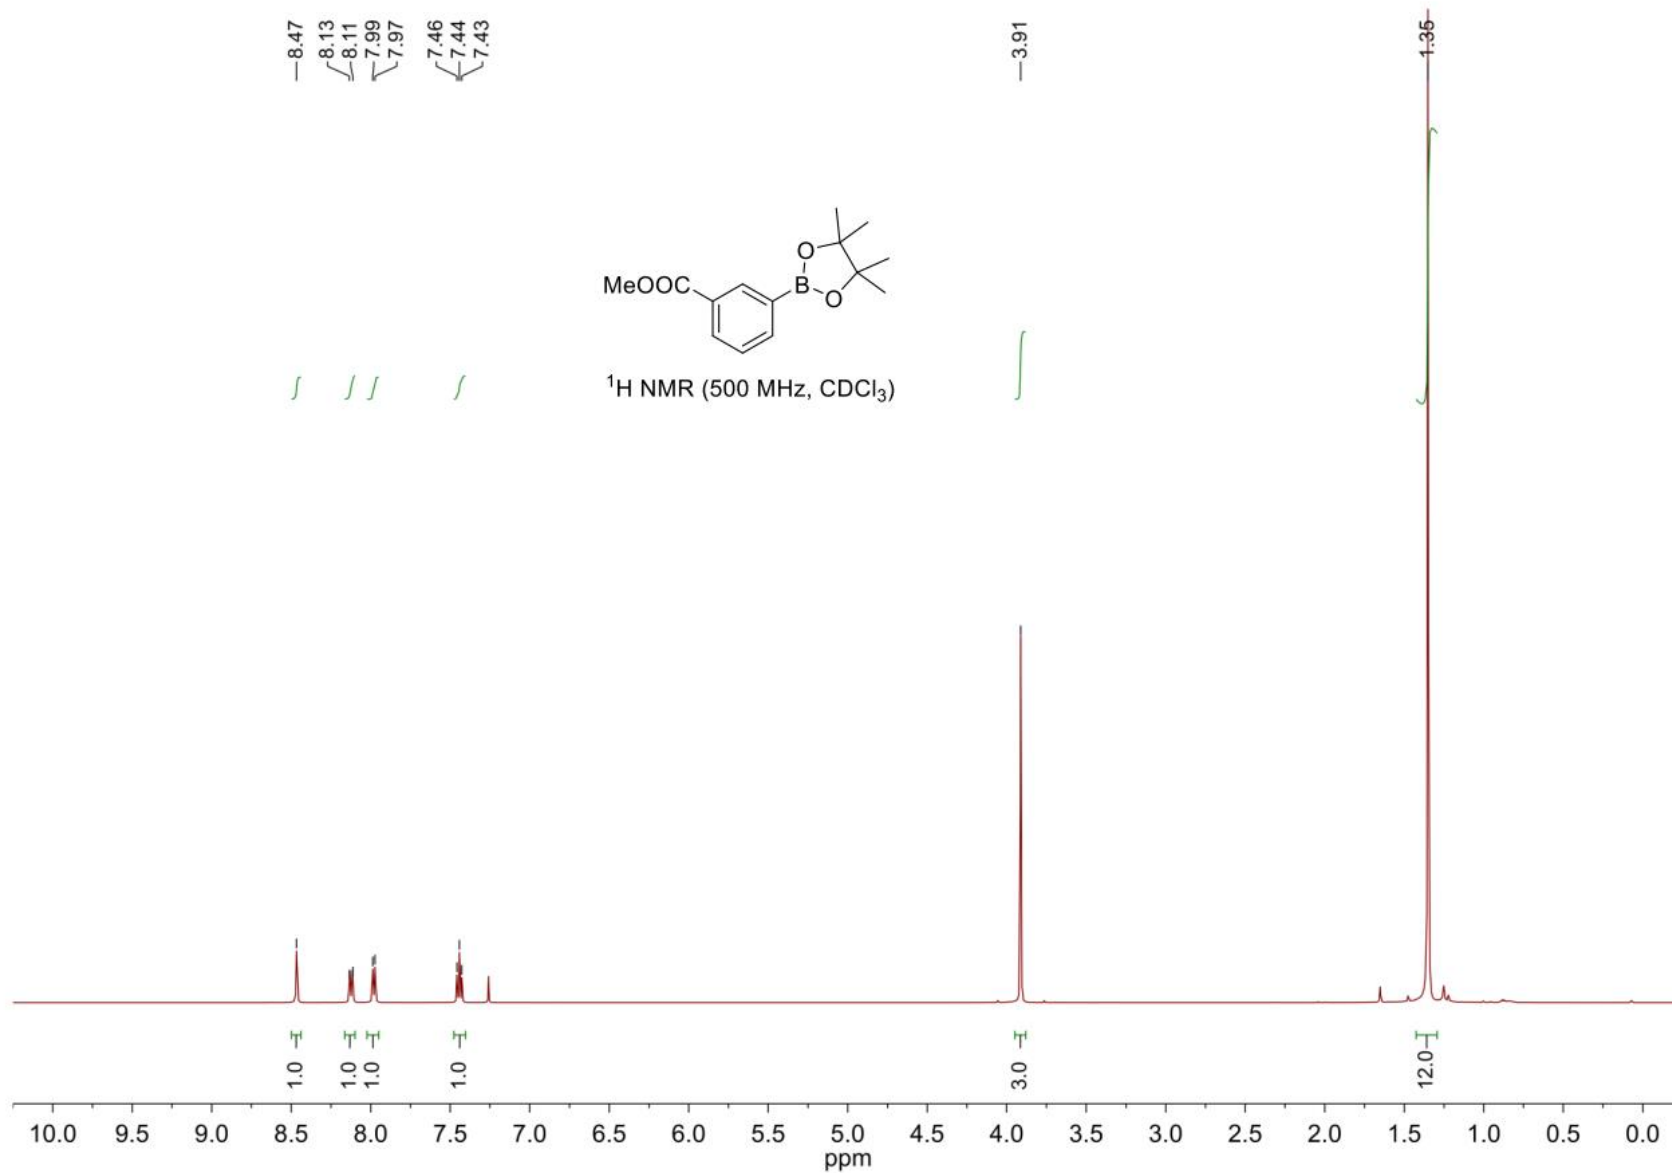

S403

# Methyl 3-(4,4,5,5-tetramethyl-1,3,2-dioxaborolan-2-yl)benzoate (65)

—167.3  
—139.3  
—136.0  
—132.4  
—129.7  
—127.9  
—84.2  
—52.2  
—25.0

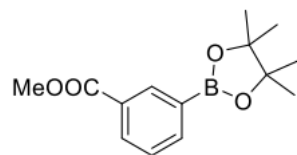

$^{13}\text{C}$  NMR (125 MHz,  $\text{CDCl}_3$ )

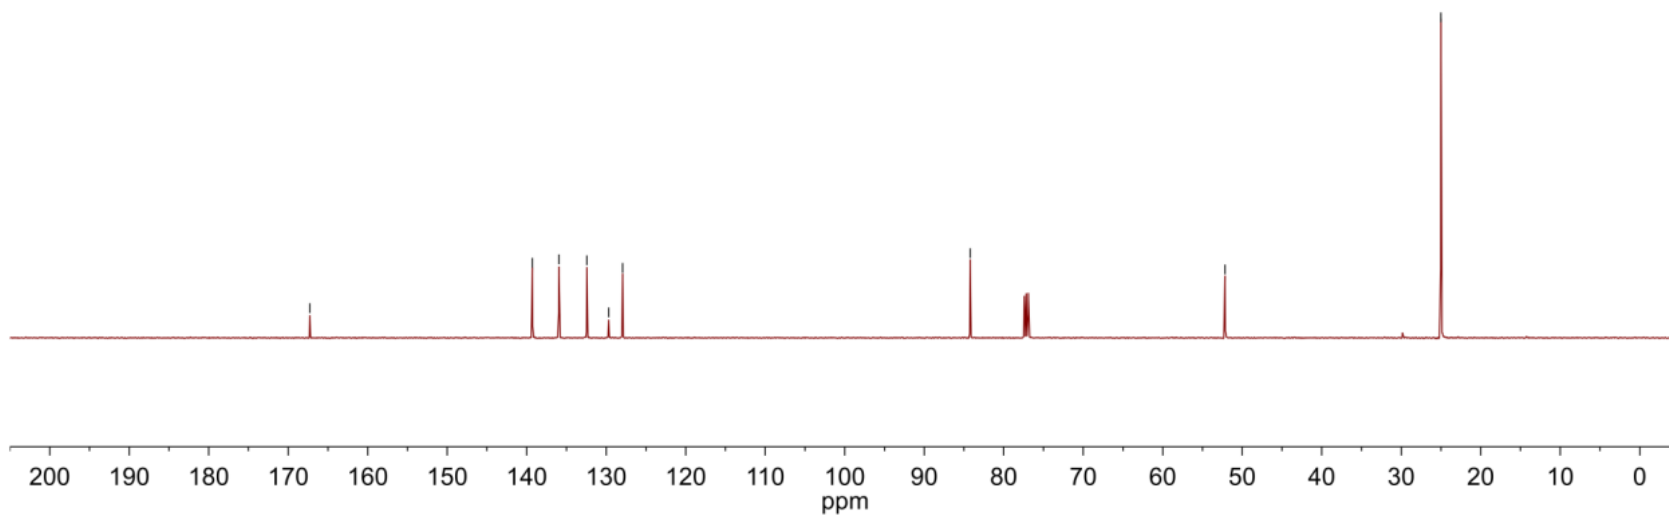

Dimethyl 4-(trifluoro-*l*-boraneyl)phthalate, potassium salt (66)

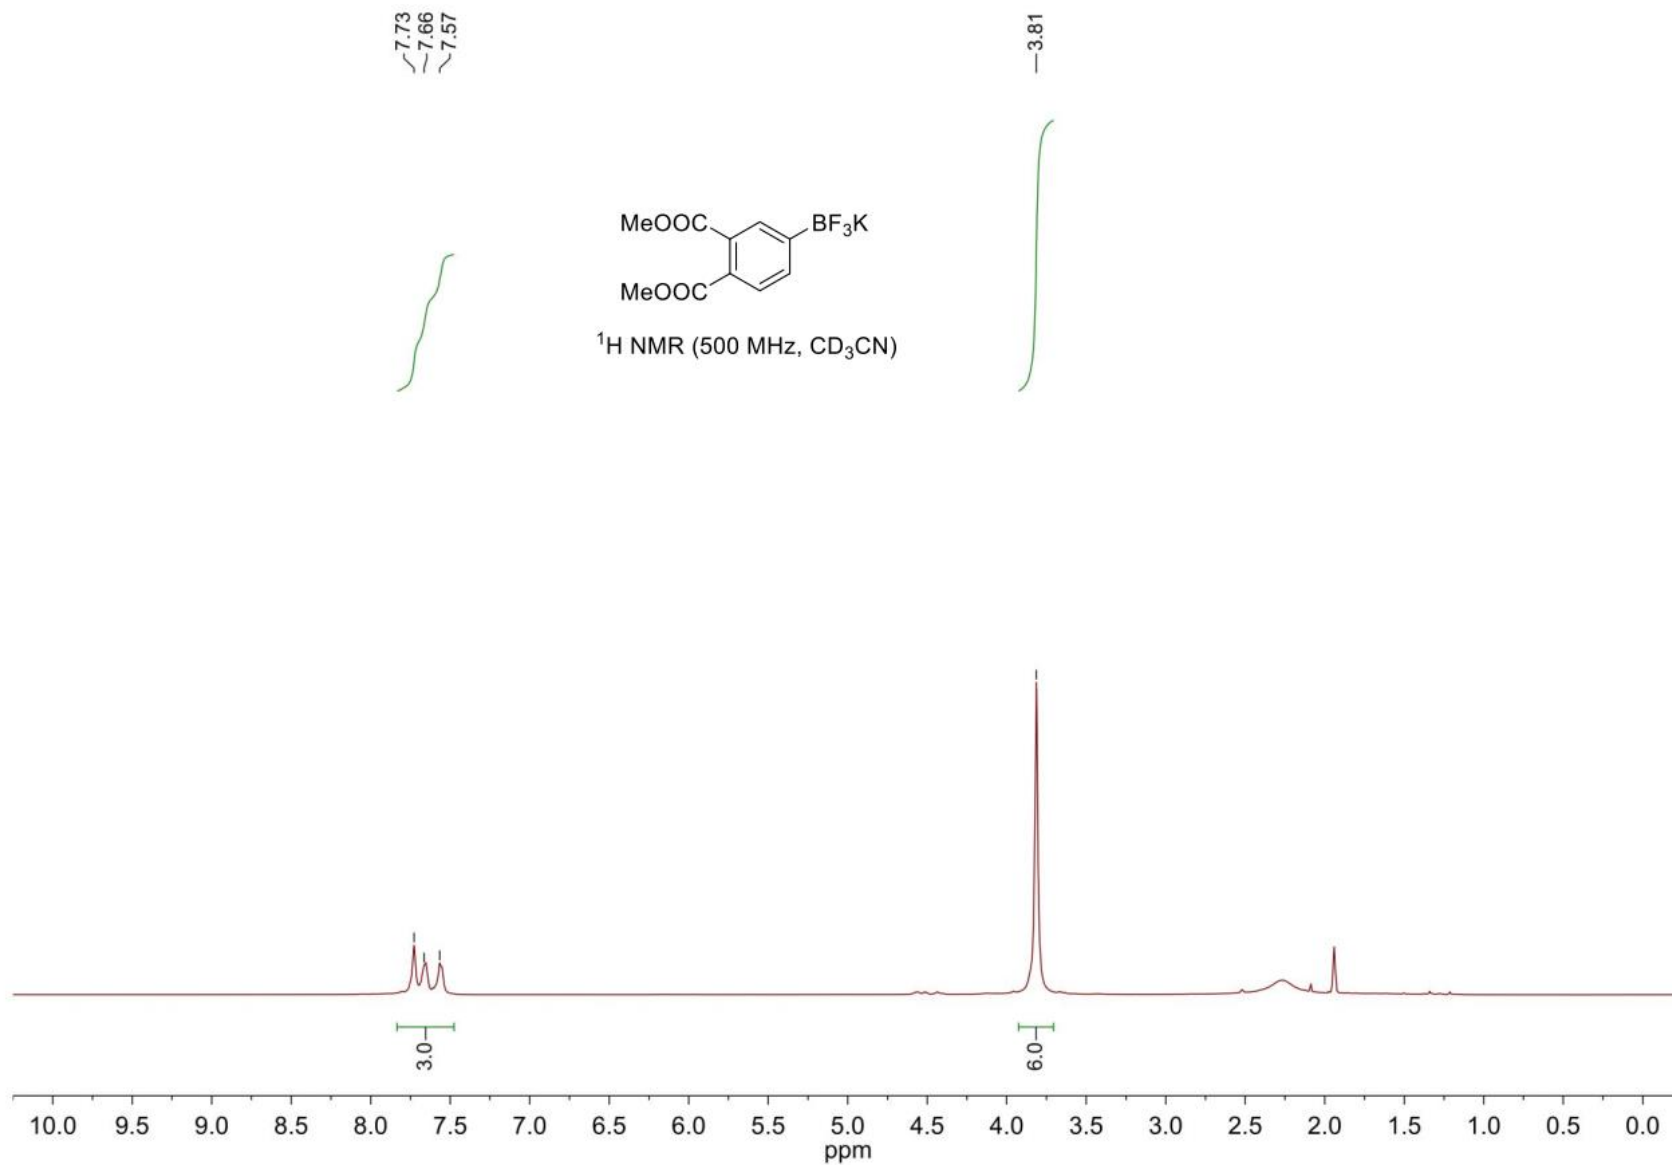

# Dimethyl 4-(trifluoro-*l*-boraneyl)phthalate, potassium salt (66)

170.41  
169.45

134.82  
132.24  
131.68  
129.56  
128.07

52.86  
52.77

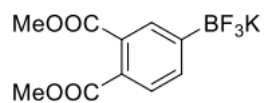

<sup>13</sup>C NMR (125 MHz, CD<sub>3</sub>CN)

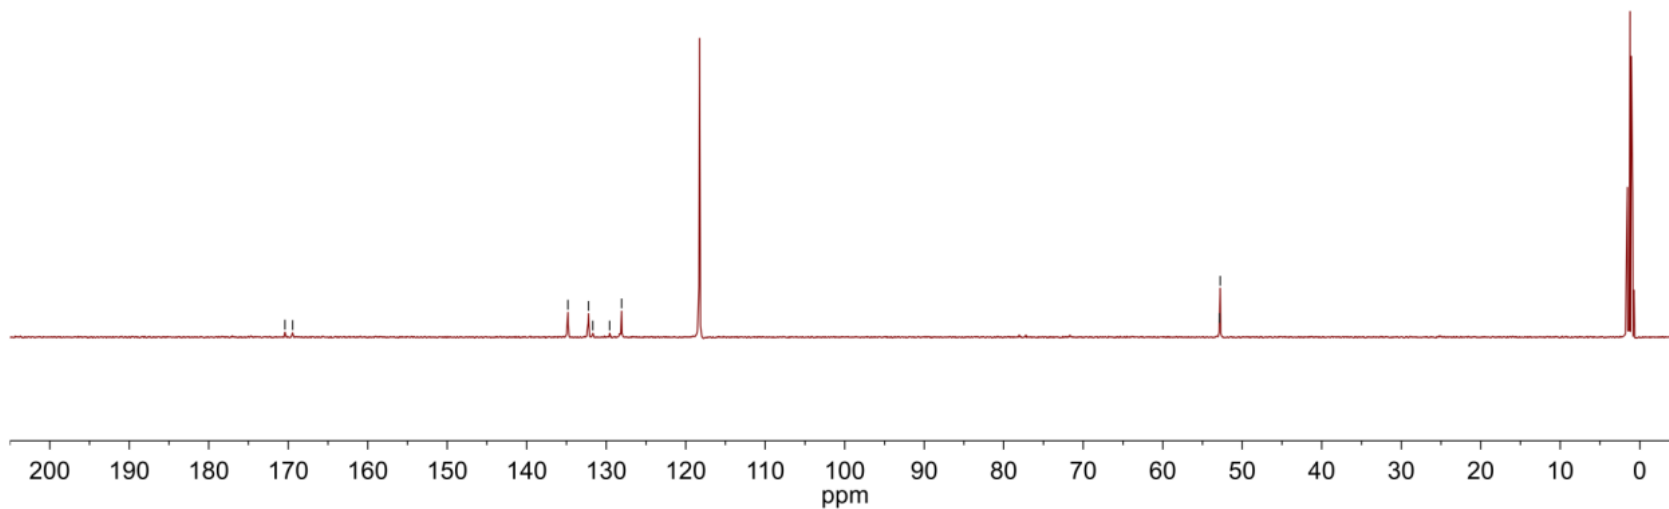

S406

4-(4,4,5,5-Tetramethyl-1,3,2-dioxaborolan-2-yl)benzaldehyde (67)

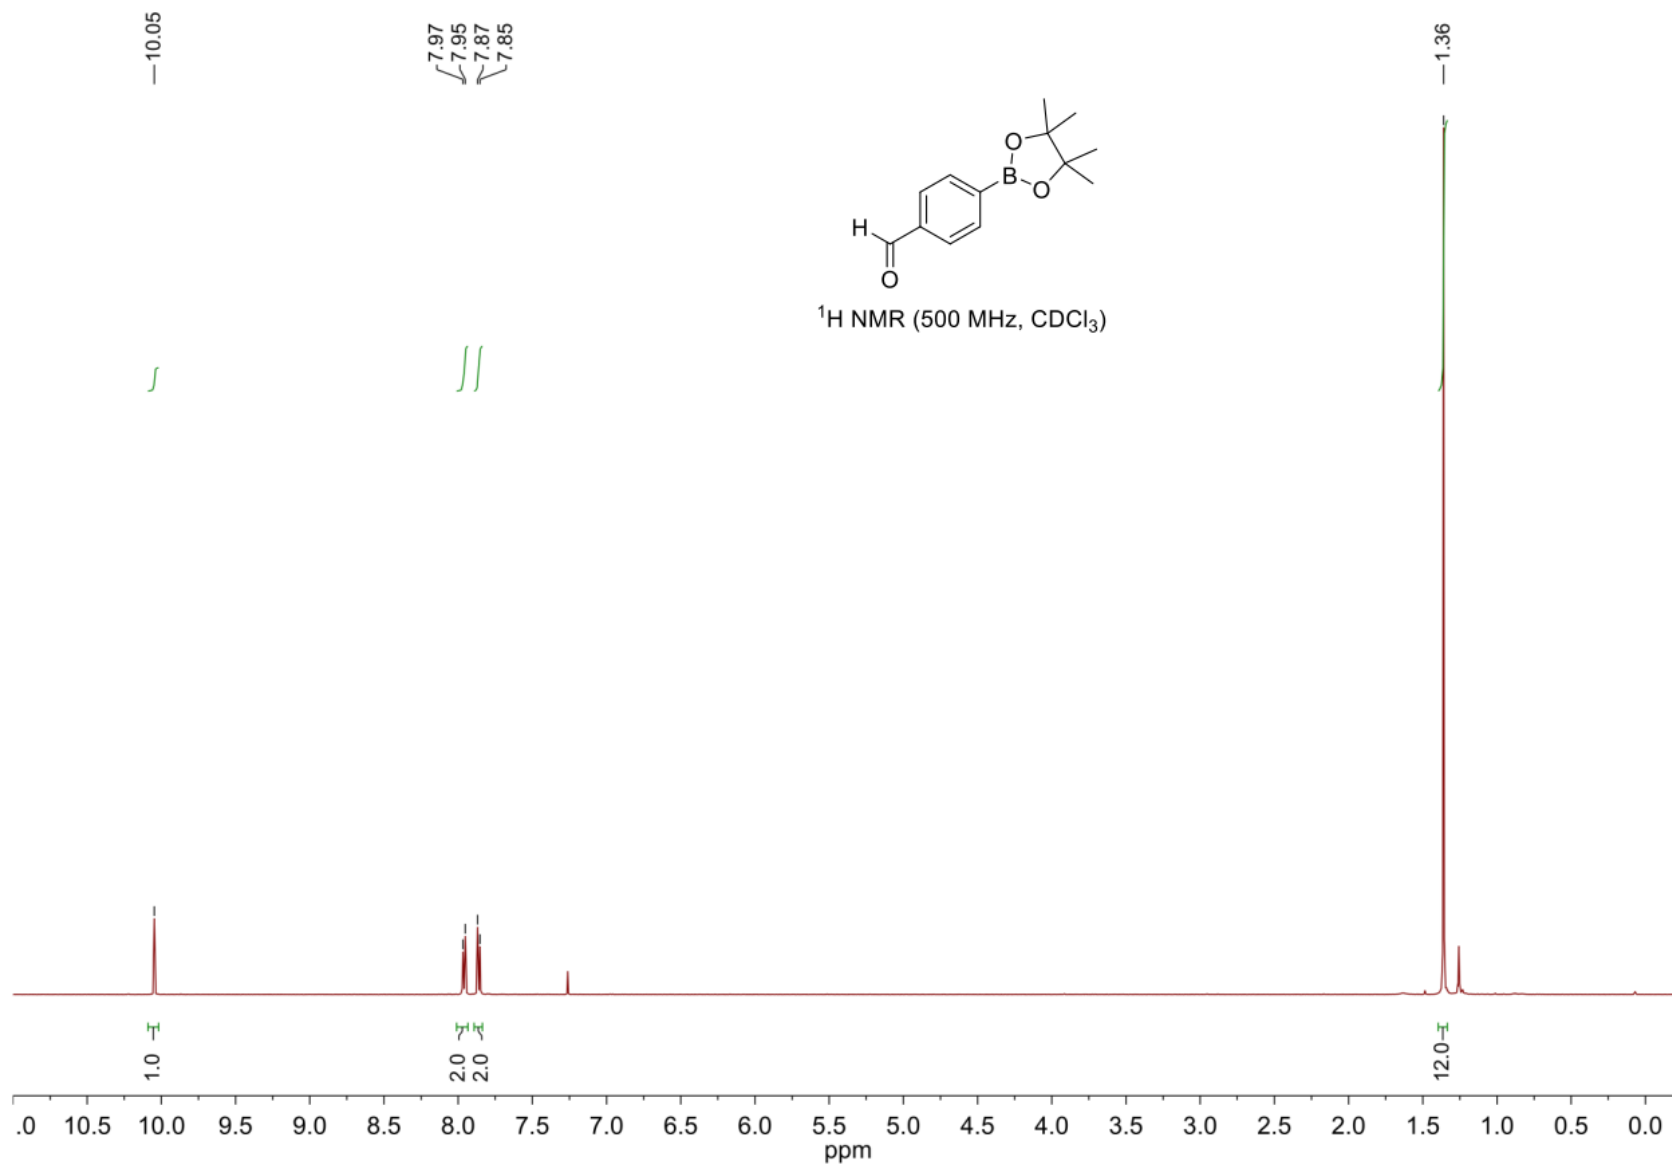

S407

# 4-(4,4,5,5-Tetramethyl-1,3,2-dioxaborolan-2-yl)benzaldehyde (67)

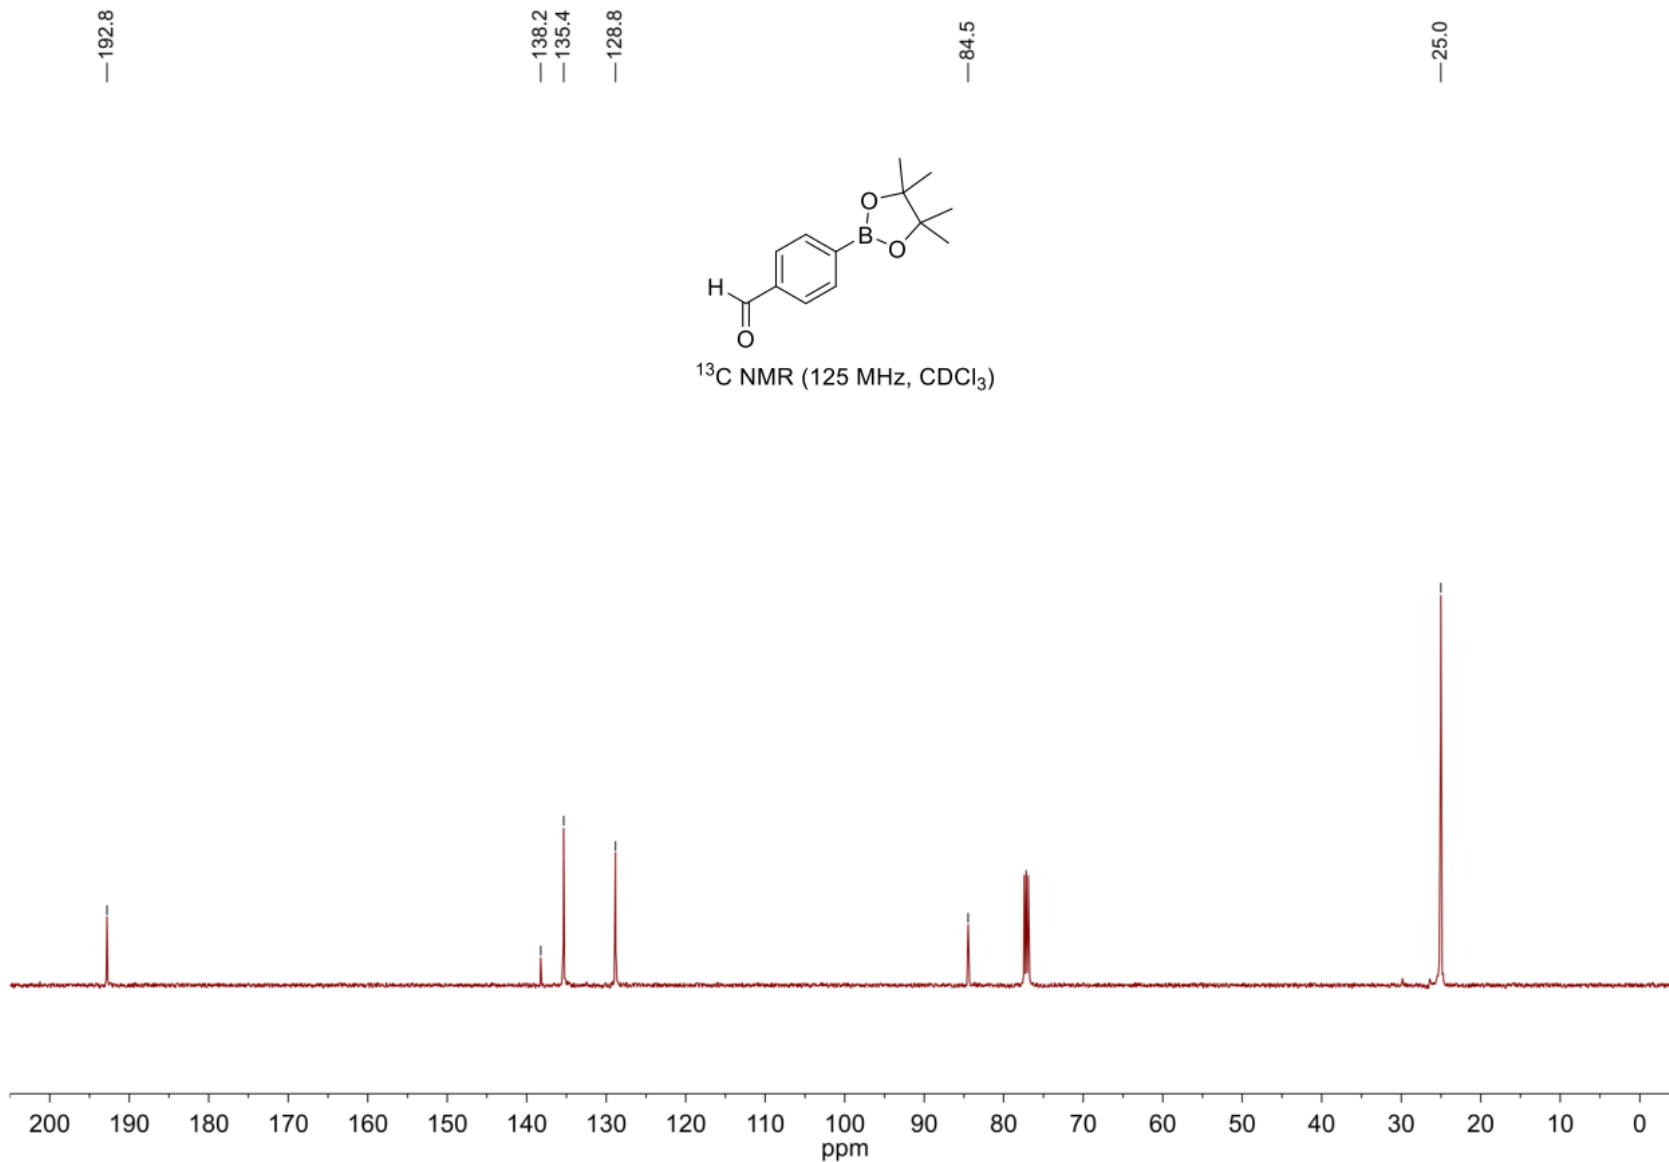



2-(9H-Fluoren-2-yl)-4,4,5,5-tetramethyl-1,3,2-dioxaborolane (68)

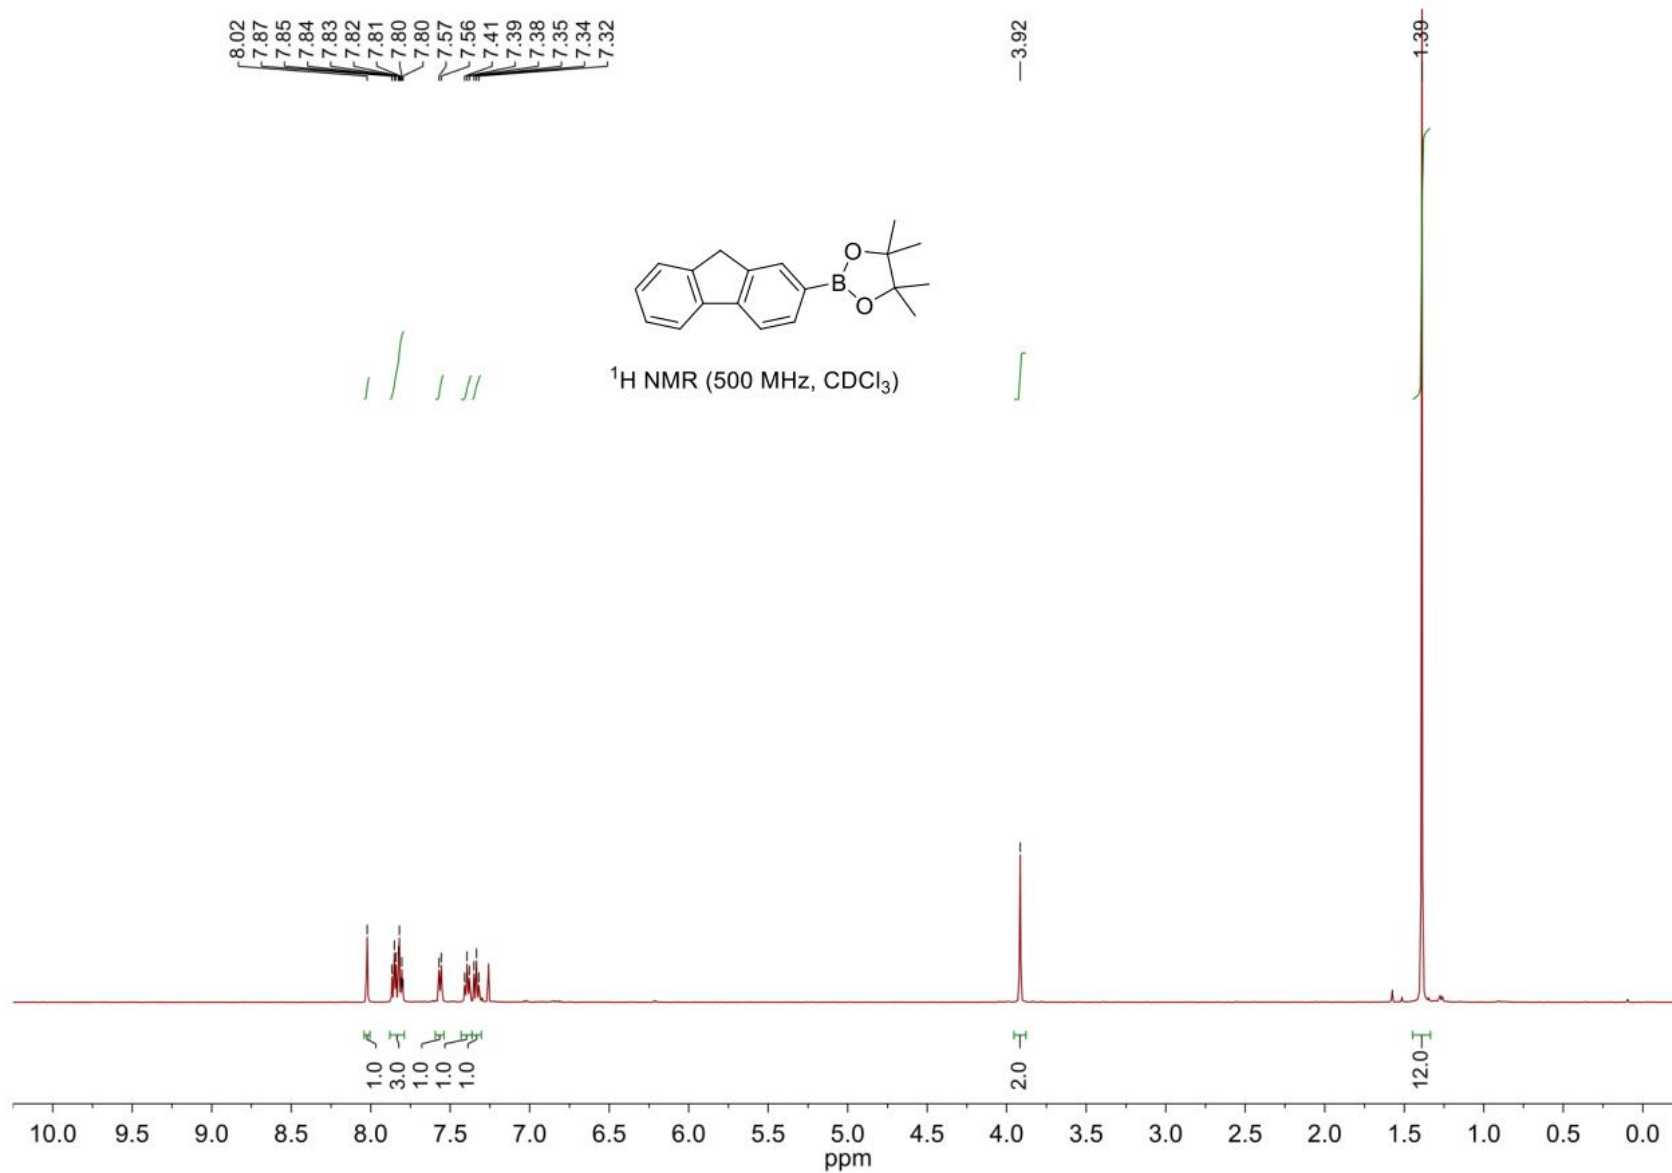

## 2-(9H-Fluoren-2-yl)-4,4,5,5-tetramethyl-1,3,2-dioxaborolane (68)

144.7  
144.0  
142.6  
141.7  
133.5  
131.4  
127.3  
126.9  
125.2  
120.5  
119.4

83.9

36.9

25.1

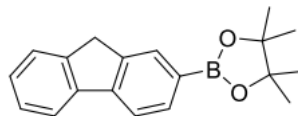

$^{13}\text{C}$  NMR (125 MHz,  $\text{CDCl}_3$ )

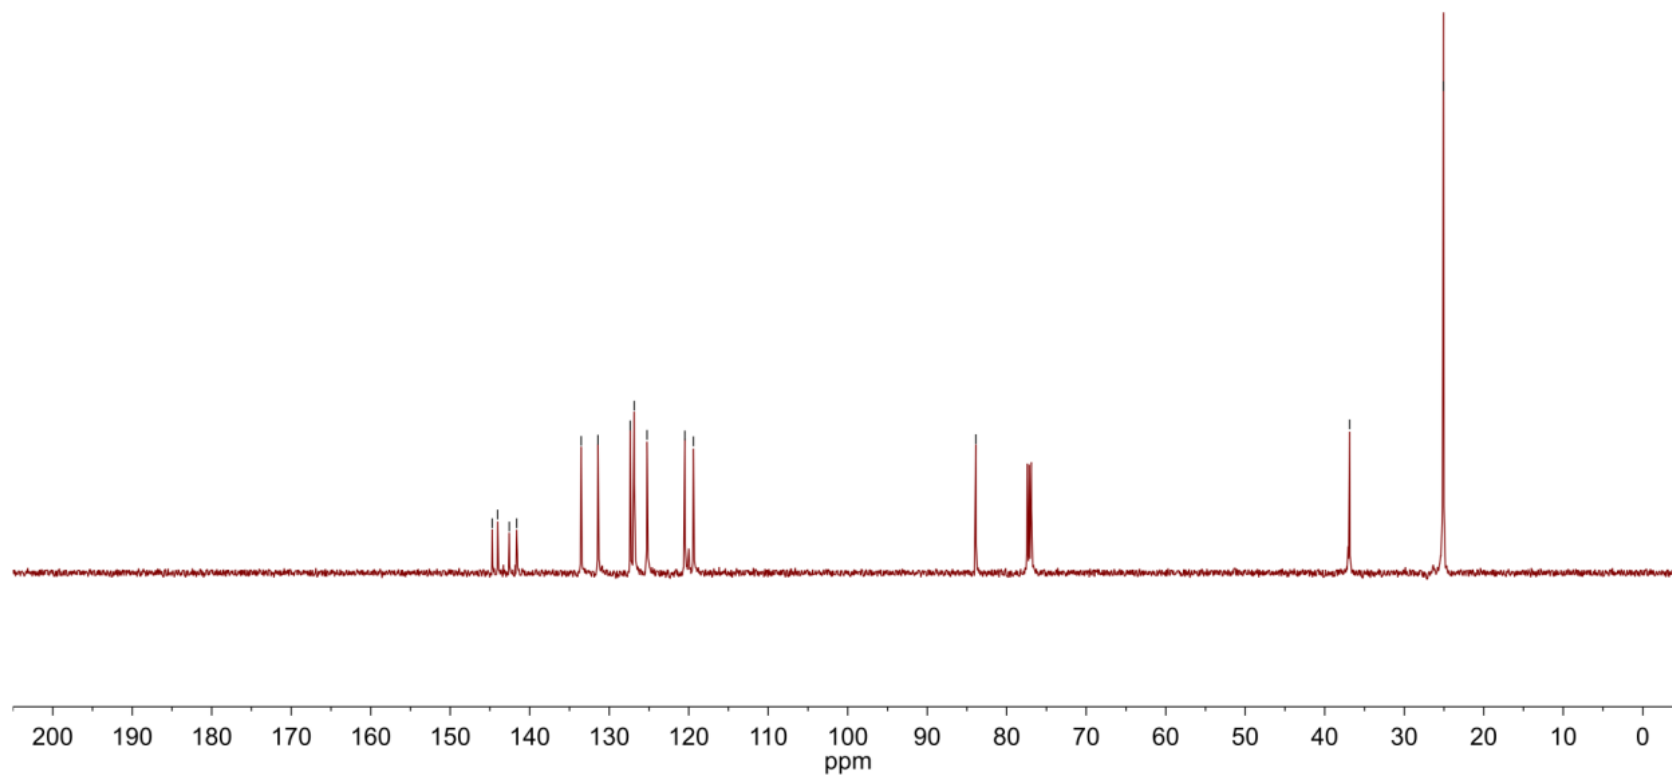

S410

2-(3-((5-(4-Fluorophenyl)thiophen-2-yl)methyl)-4-methylphenyl)-4,4,5,5-tetramethyl-1,3,2-dioxaborolane (69)

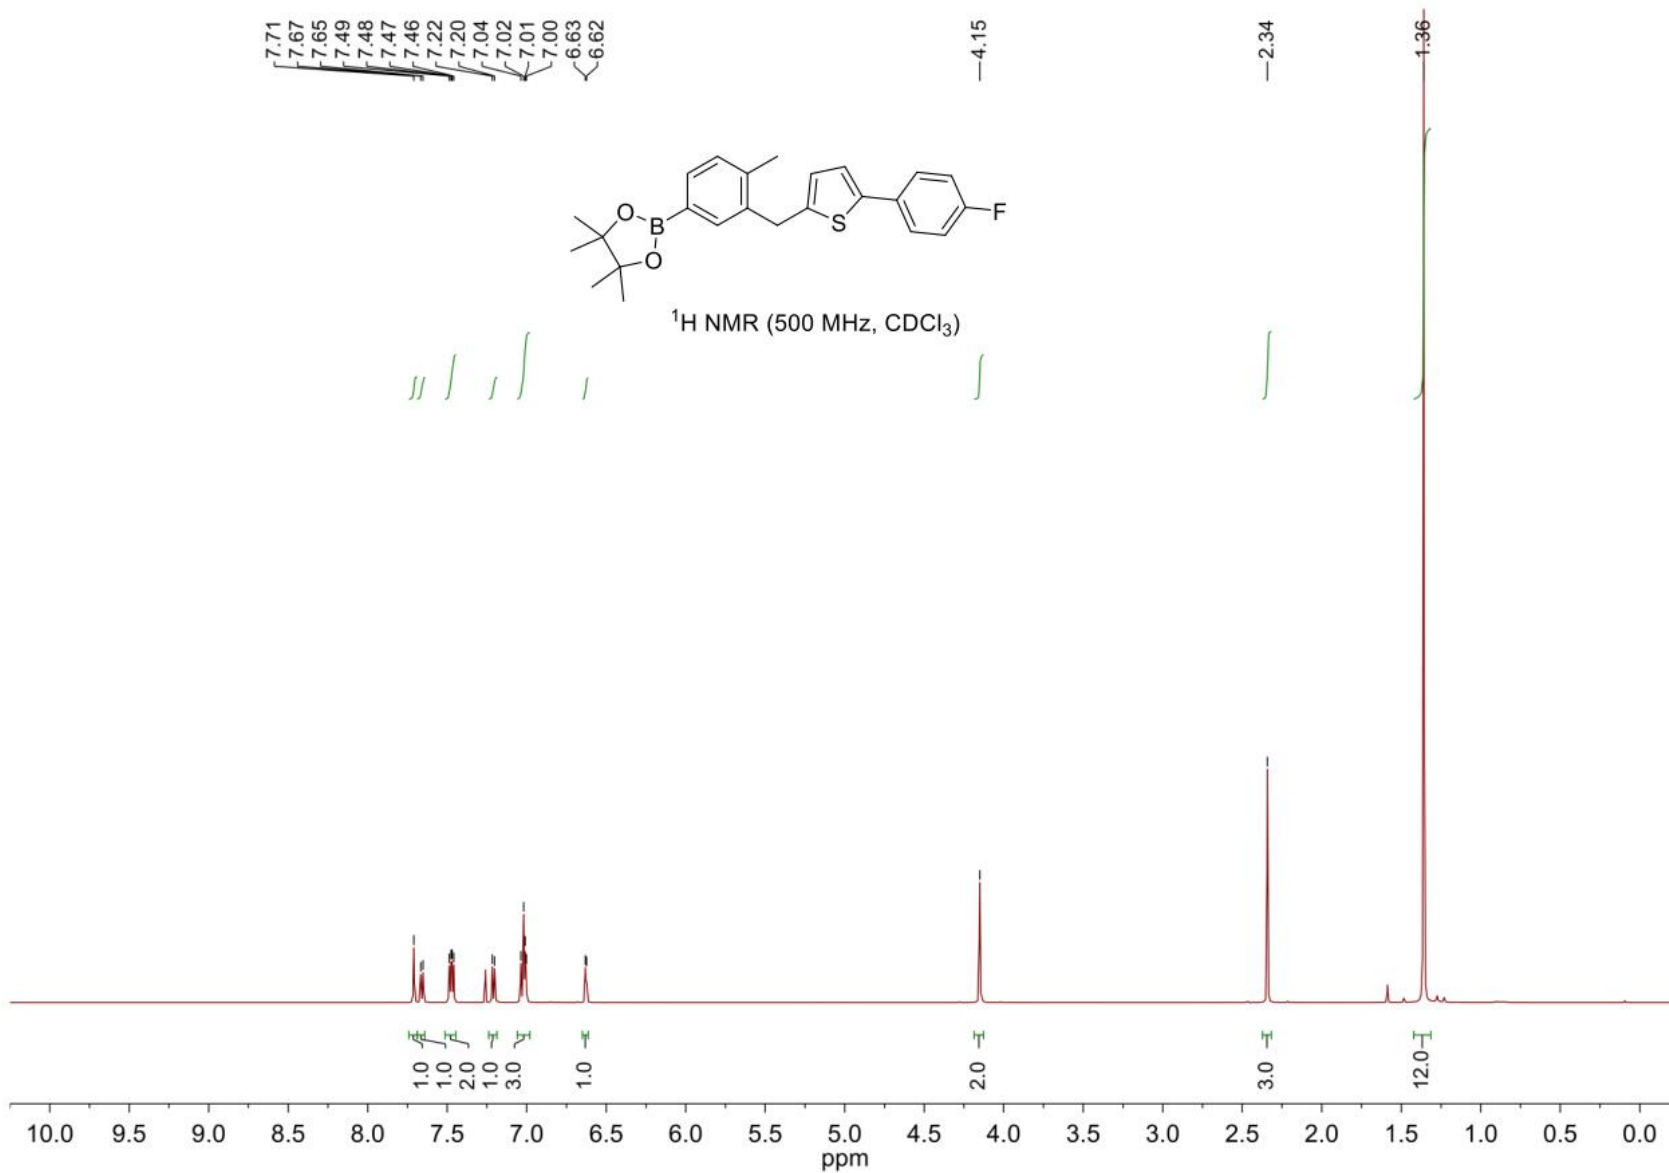

2-(3-((5-(4-Fluorophenyl)thiophen-2-yl)methyl)-4-methylphenyl)-4,4,5,5-tetramethyl-1,3,2-dioxaborolane (69)

163.1  
161.2  
144.0  
141.4  
140.2  
137.5  
136.4  
133.8  
131.1  
130.2  
127.2  
127.2  
125.8  
122.7  
115.9  
115.7  
83.8  
34.4  
25.0  
19.9

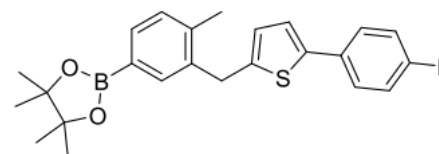

<sup>13</sup>C NMR (125 MHz, CDCl<sub>3</sub>)

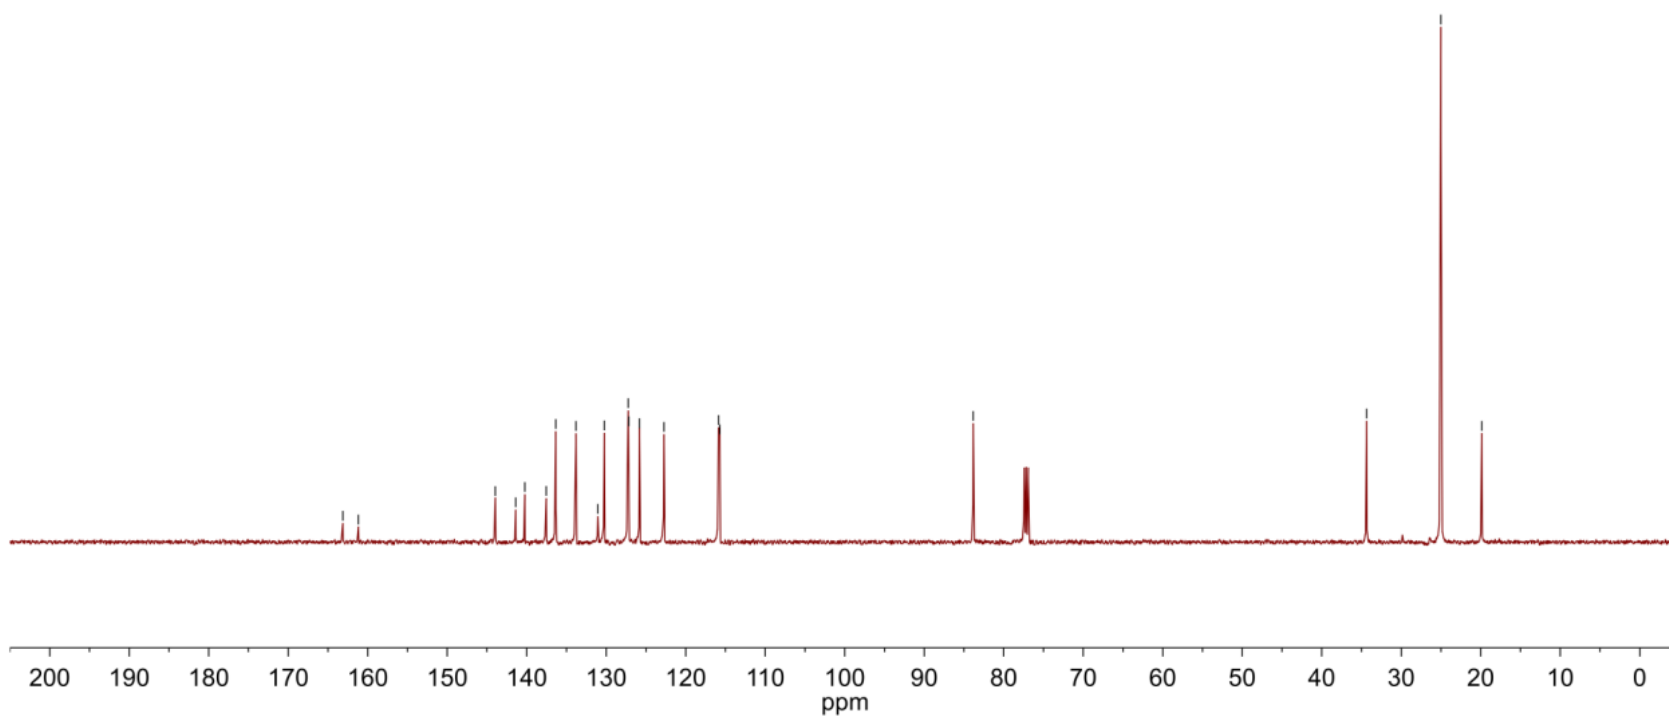

4,4,5,5-Tetramethyl-2-(naphthalen-2-yl)-1,3,2-dioxaborolane (70)

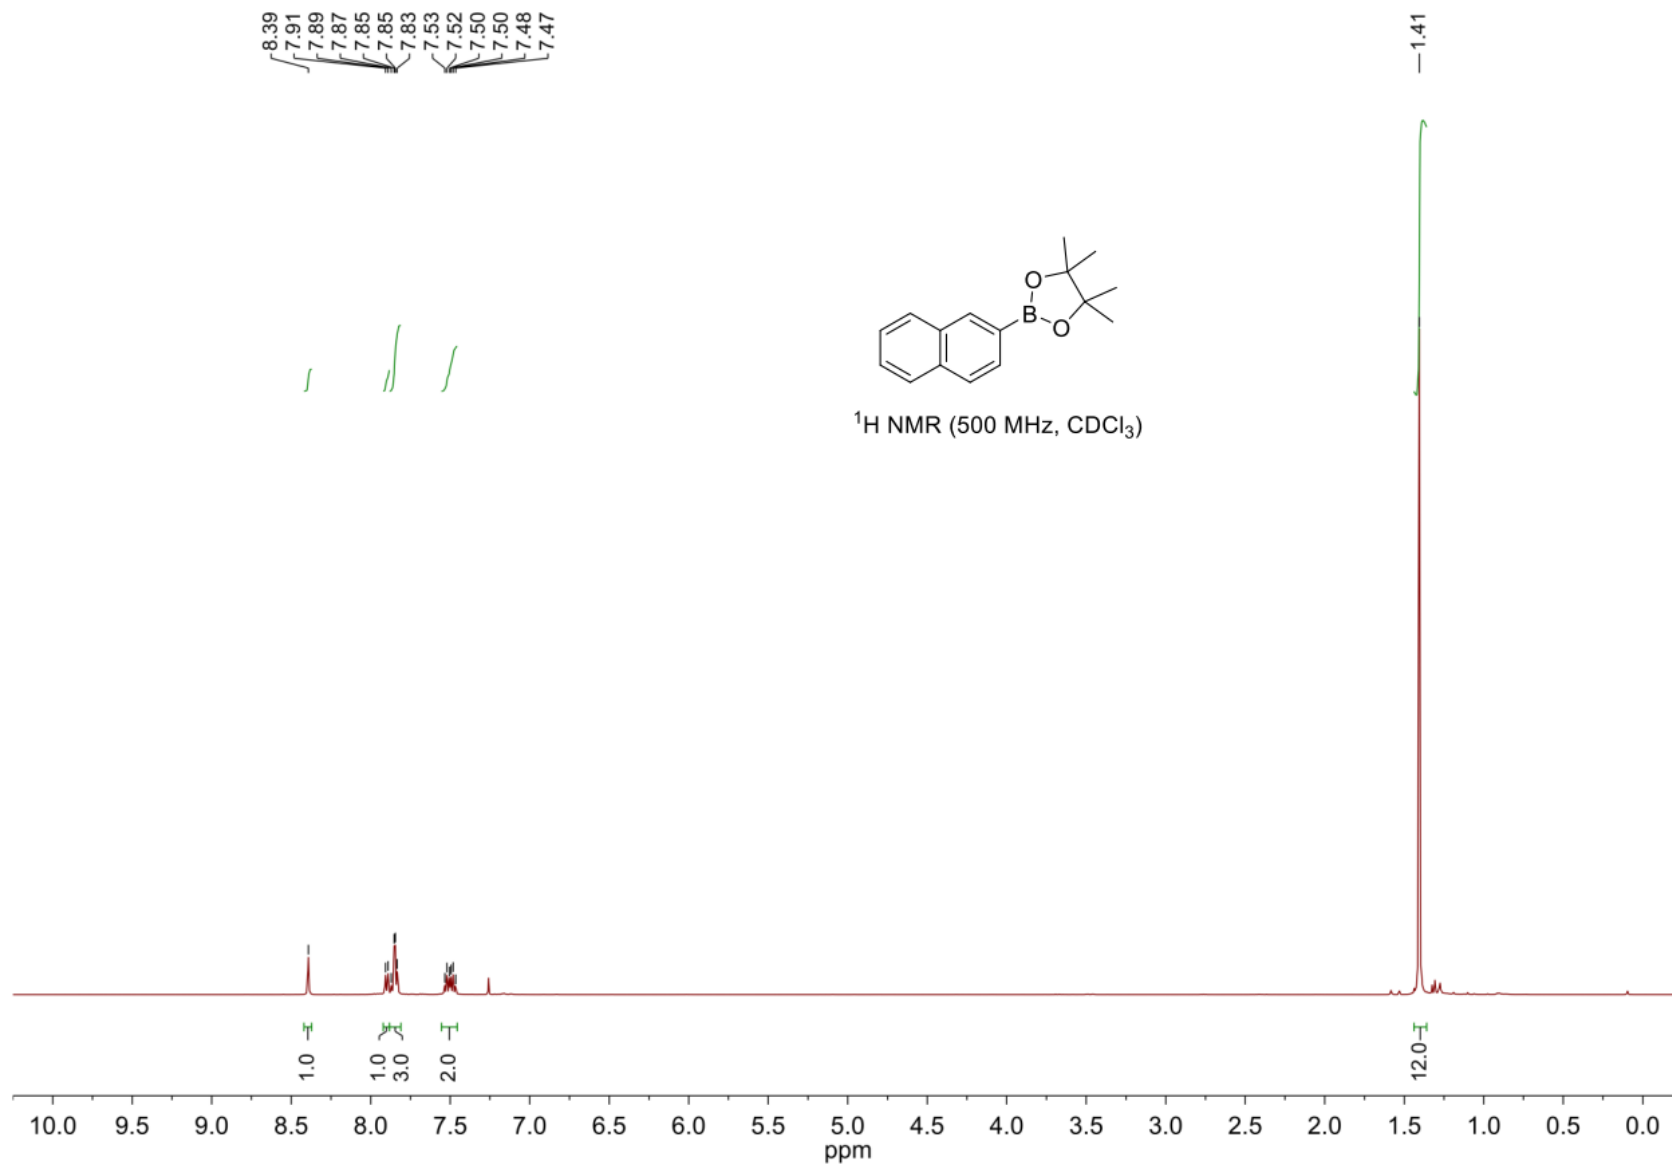

# 4,4,5,5-Tetramethyl-2-(naphthalen-2-yl)-1,3,2-dioxaborolane (70)

136.4  
135.2  
133.0  
130.5  
128.8  
127.8  
127.1  
125.9

84.1

25.1

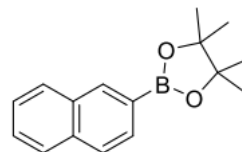

$^{13}\text{C}$  NMR (125 MHz,  $\text{CDCl}_3$ )

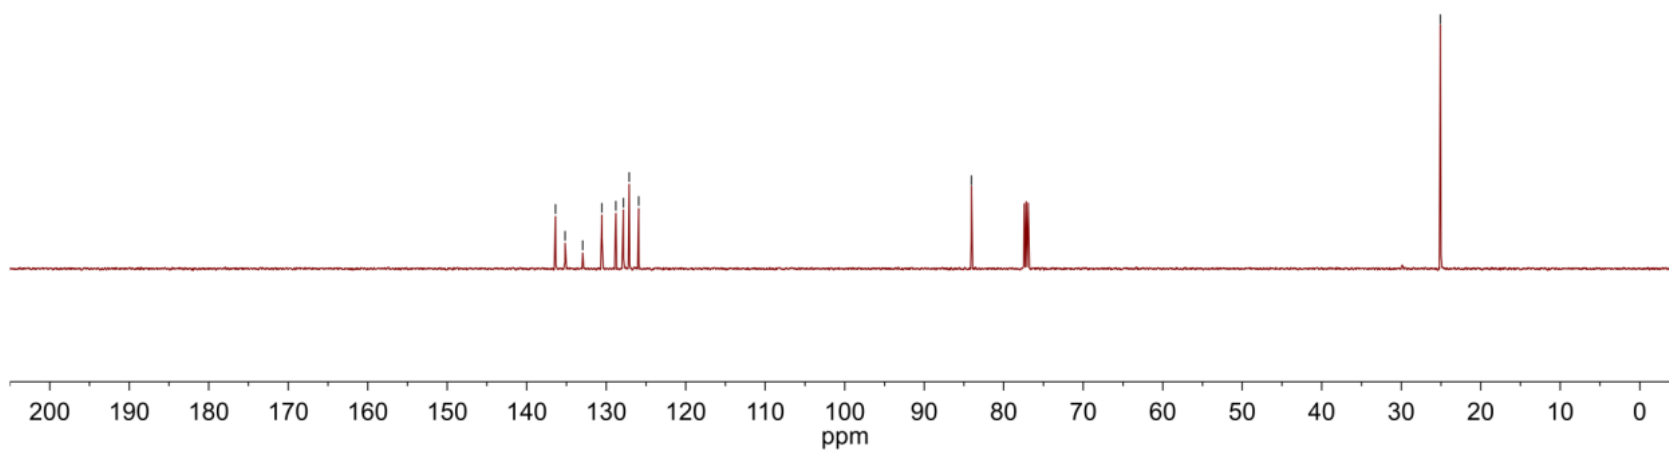

Methyl 5-(4,4,5,5-tetramethyl-1,3,2-dioxaborolan-2-yl)-1-naphthoate (71)

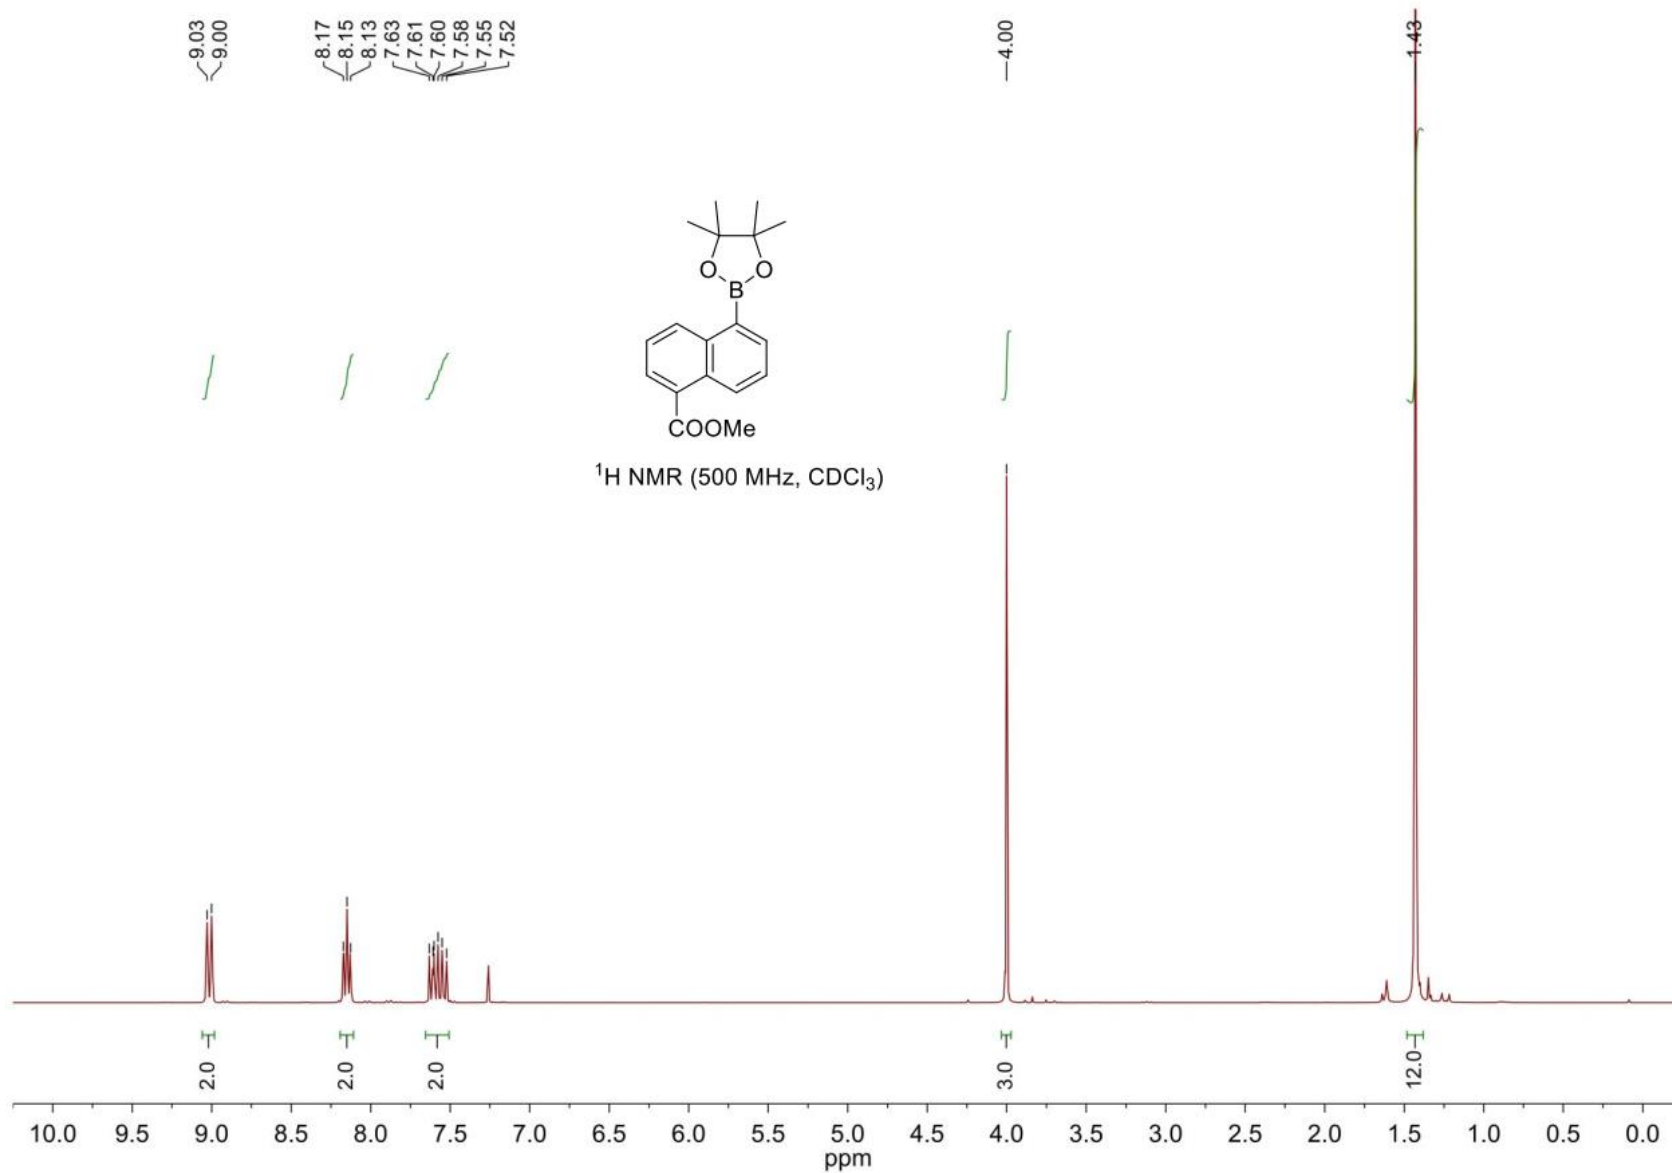

S415

# Methyl 5-(4,4,5,5-tetramethyl-1,3,2-dioxaborolan-2-yl)-1-naphthoate (71)

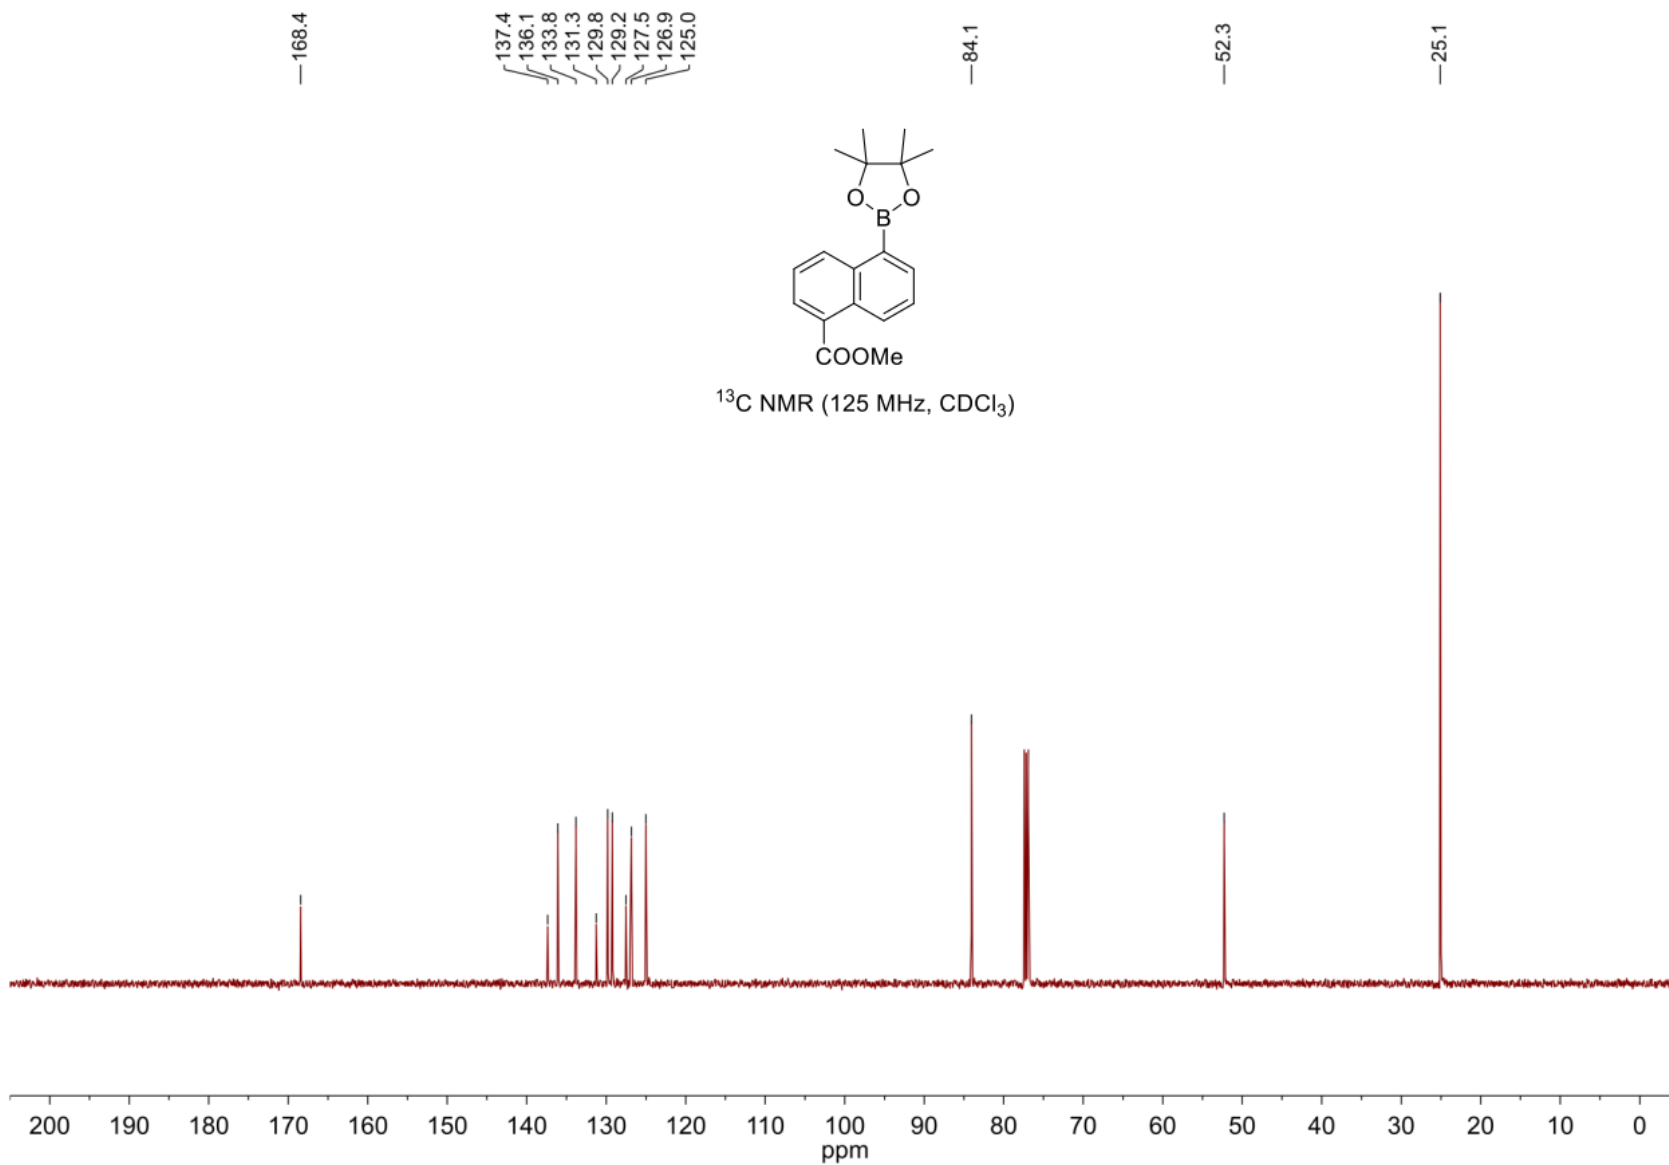

S416



## 2-(4-Fluoronaphthalen-1-yl)-4,4,5,5-tetramethyl-1,3,2-dioxaborolane (72)

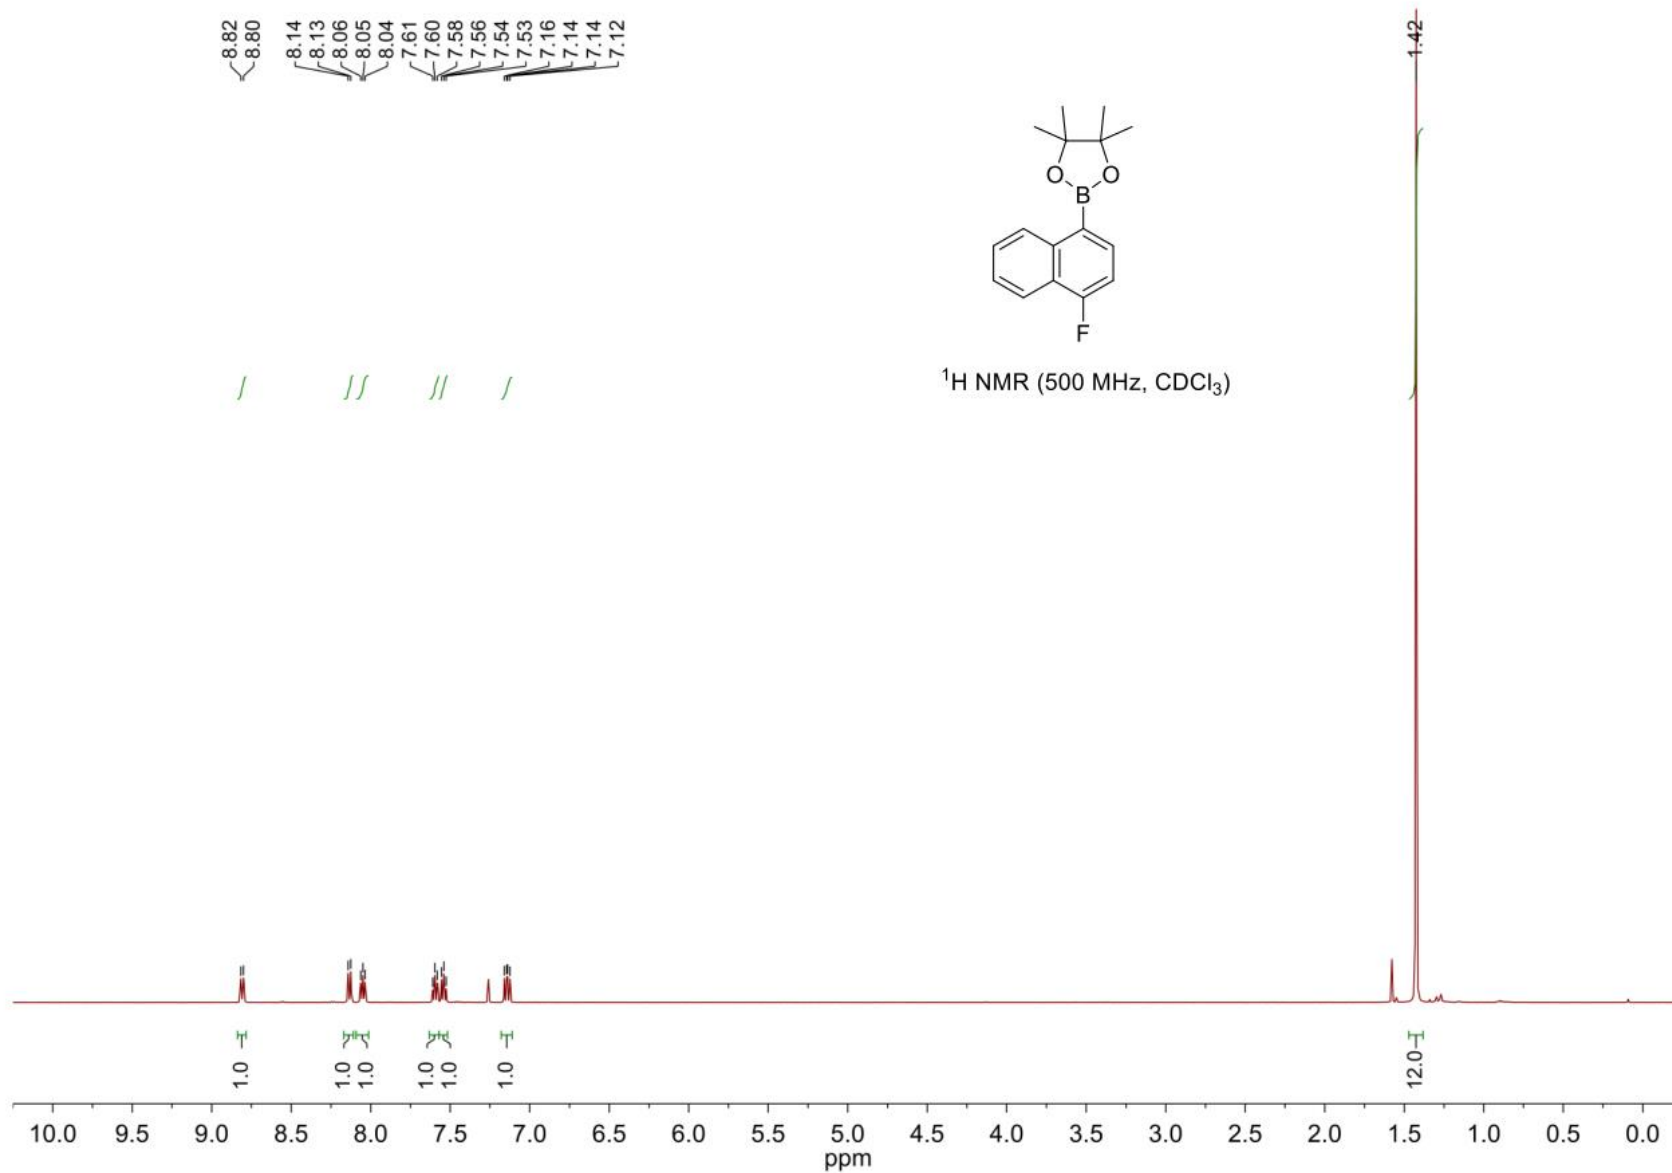

S417

## 2-(4-Fluoronaphthalen-1-yl)-4,4,5,5-tetramethyl-1,3,2-dioxaborolane (72)

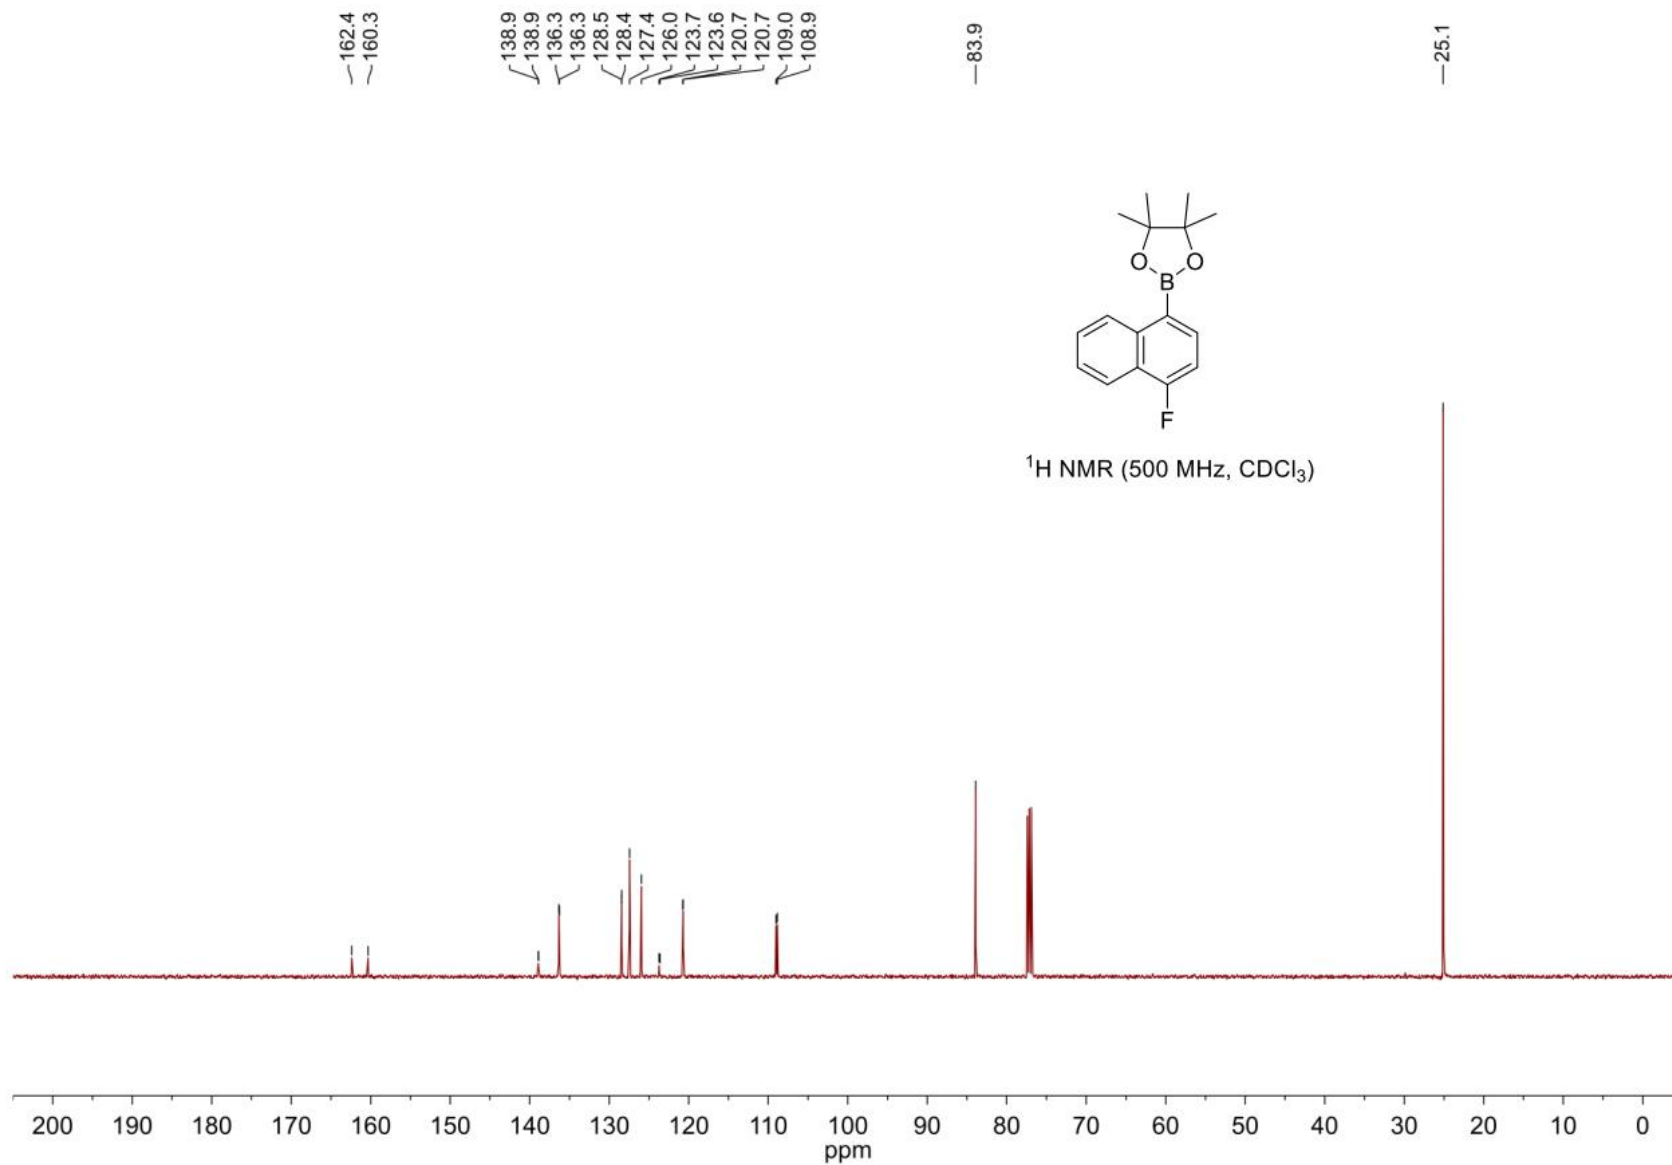

2-(6-Methoxynaphthalen-1-yl)-4,4,5,5-tetramethyl-1,3,2-dioxaborolane (73)

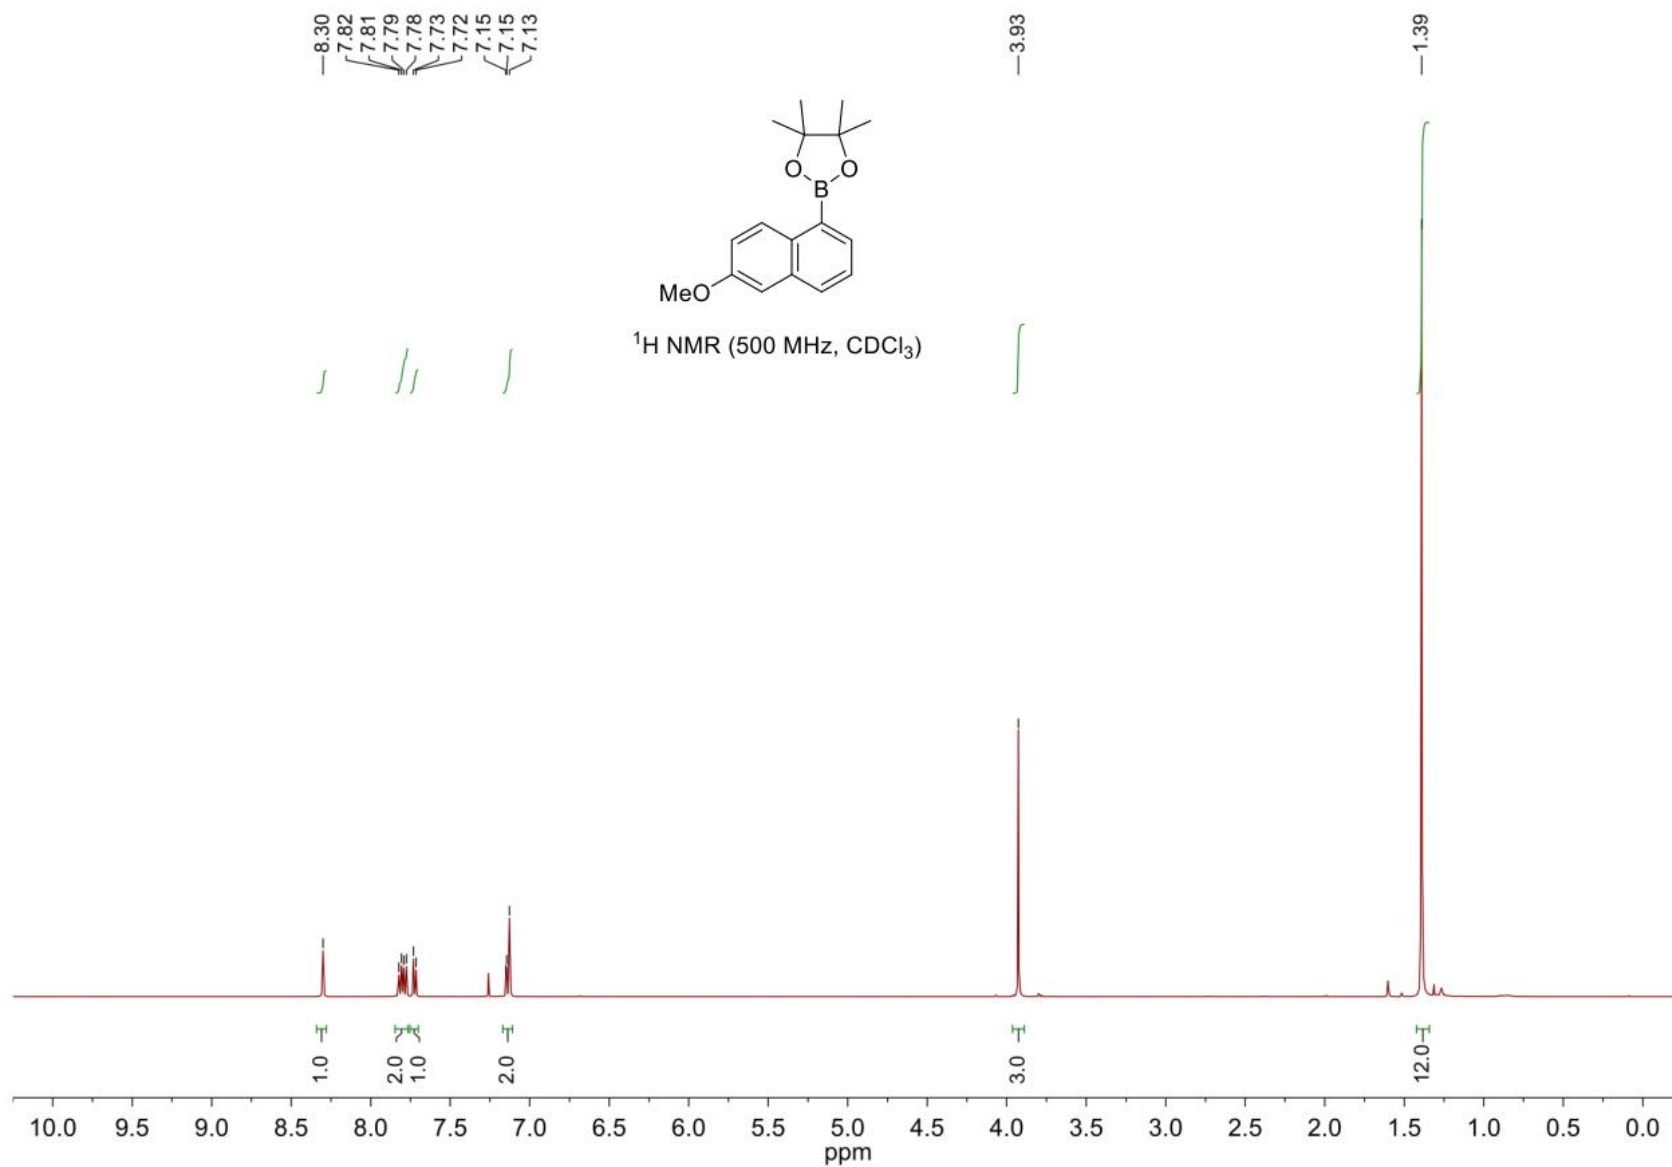

2-(6-Methoxynaphthalen-1-yl)-4,4,5,5-tetramethyl-1,3,2-dioxaborolane (73)

—158.7  
—136.6  
—136.1  
—131.2  
—130.4  
—128.5  
—126.0  
—118.8  
—105.8  
—83.9  
—55.4  
—25.1

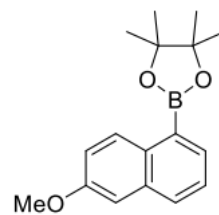

$^{13}\text{C}$  NMR (125 MHz,  $\text{CDCl}_3$ )

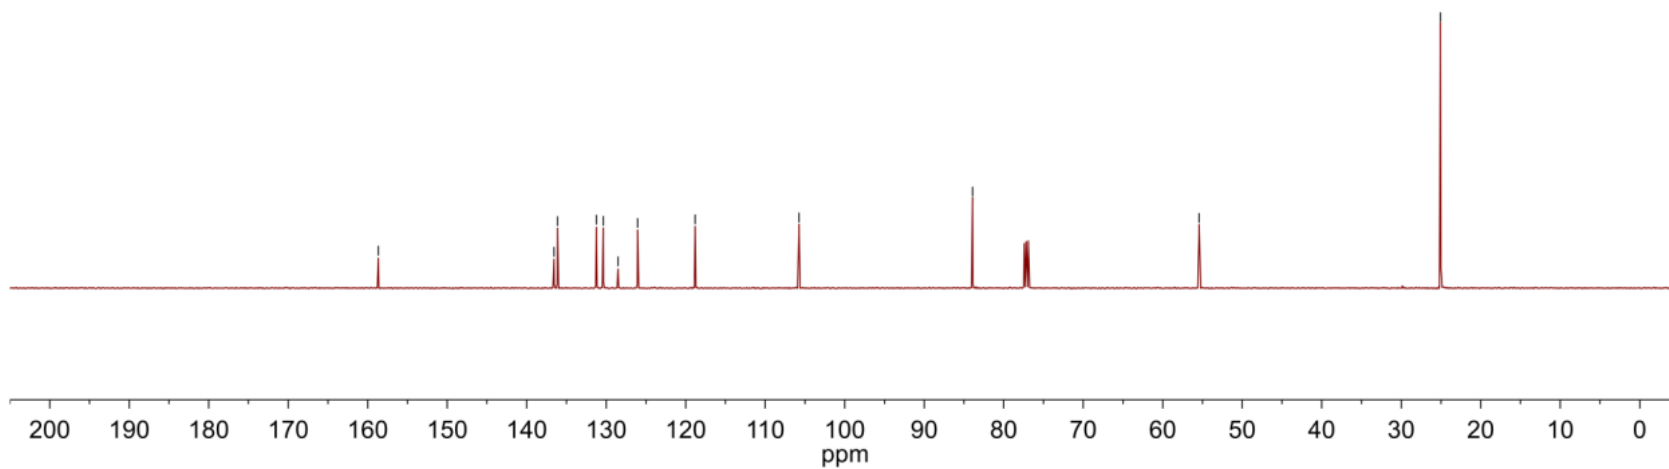

S420

# 4,4,5,5-Tetramethyl-2-(phenanthren-9-yl)-1,3,2-dioxaborolane (74)

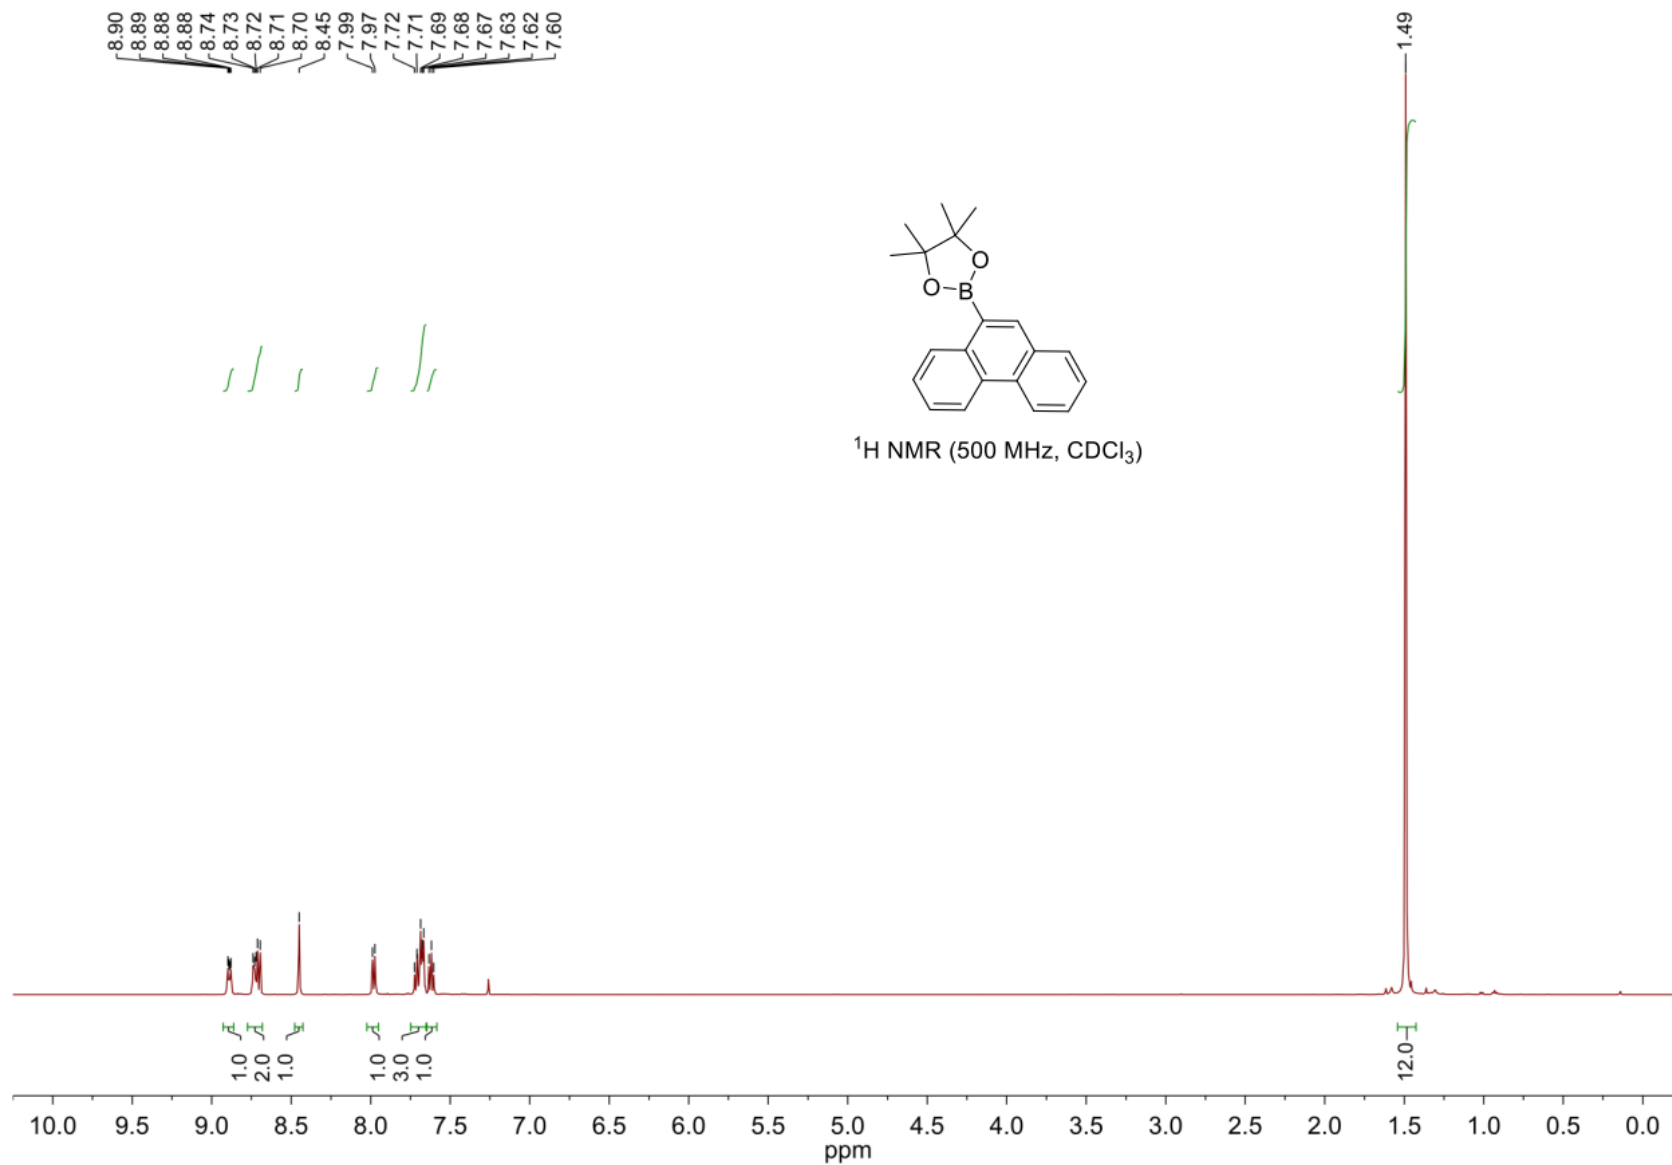

S421

# 4,4,5,5-Tetramethyl-2-(phenanthren-9-yl)-1,3,2-dioxaborolane (74)

138.3  
134.6  
132.0  
131.1  
130.1  
129.5  
129.2  
127.9  
126.8  
126.6  
126.3  
122.7  
122.6

84.0

25.1

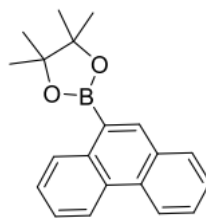

$^{13}\text{C}$  NMR (125 MHz,  $\text{CDCl}_3$ )

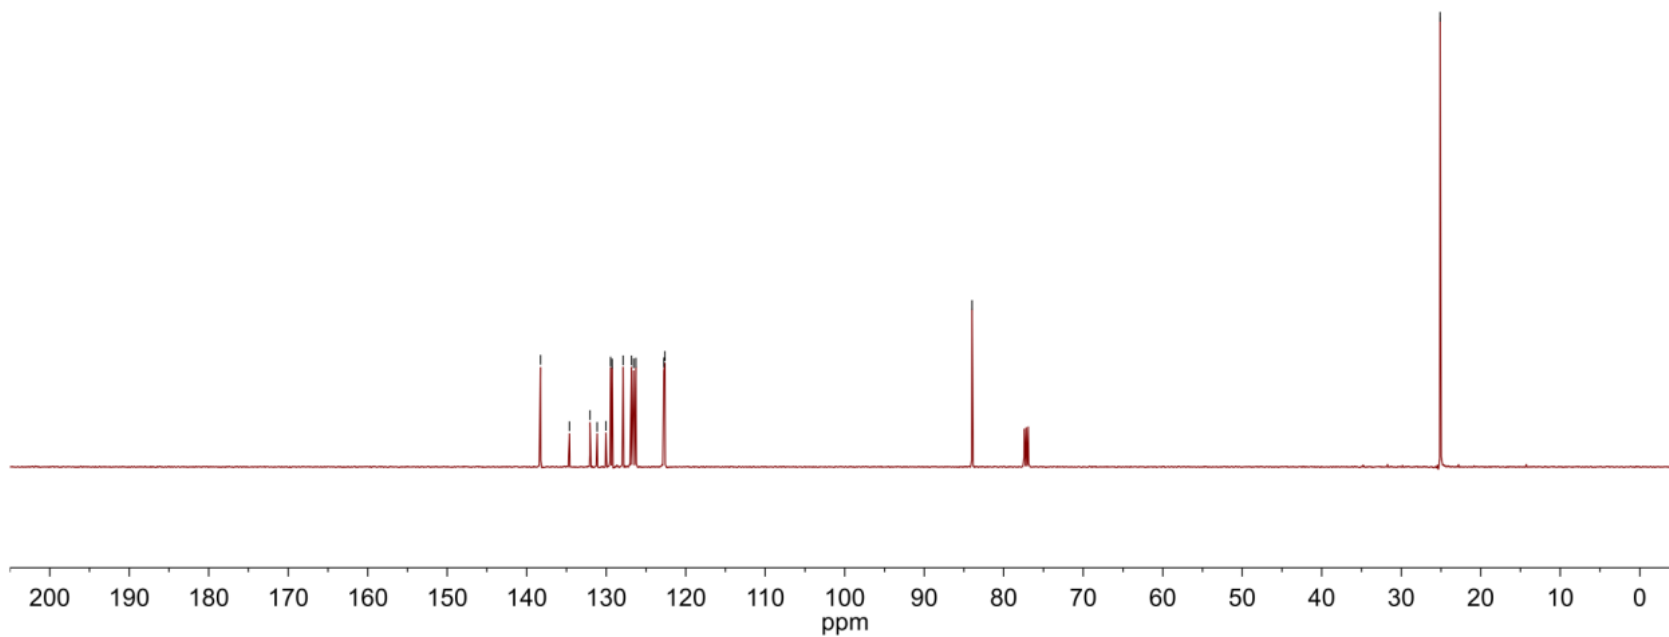

S422

5-(4,4,5,5-Tetramethyl-1,3,2-dioxaborolan-2-yl)pyridin-2-amine (75)

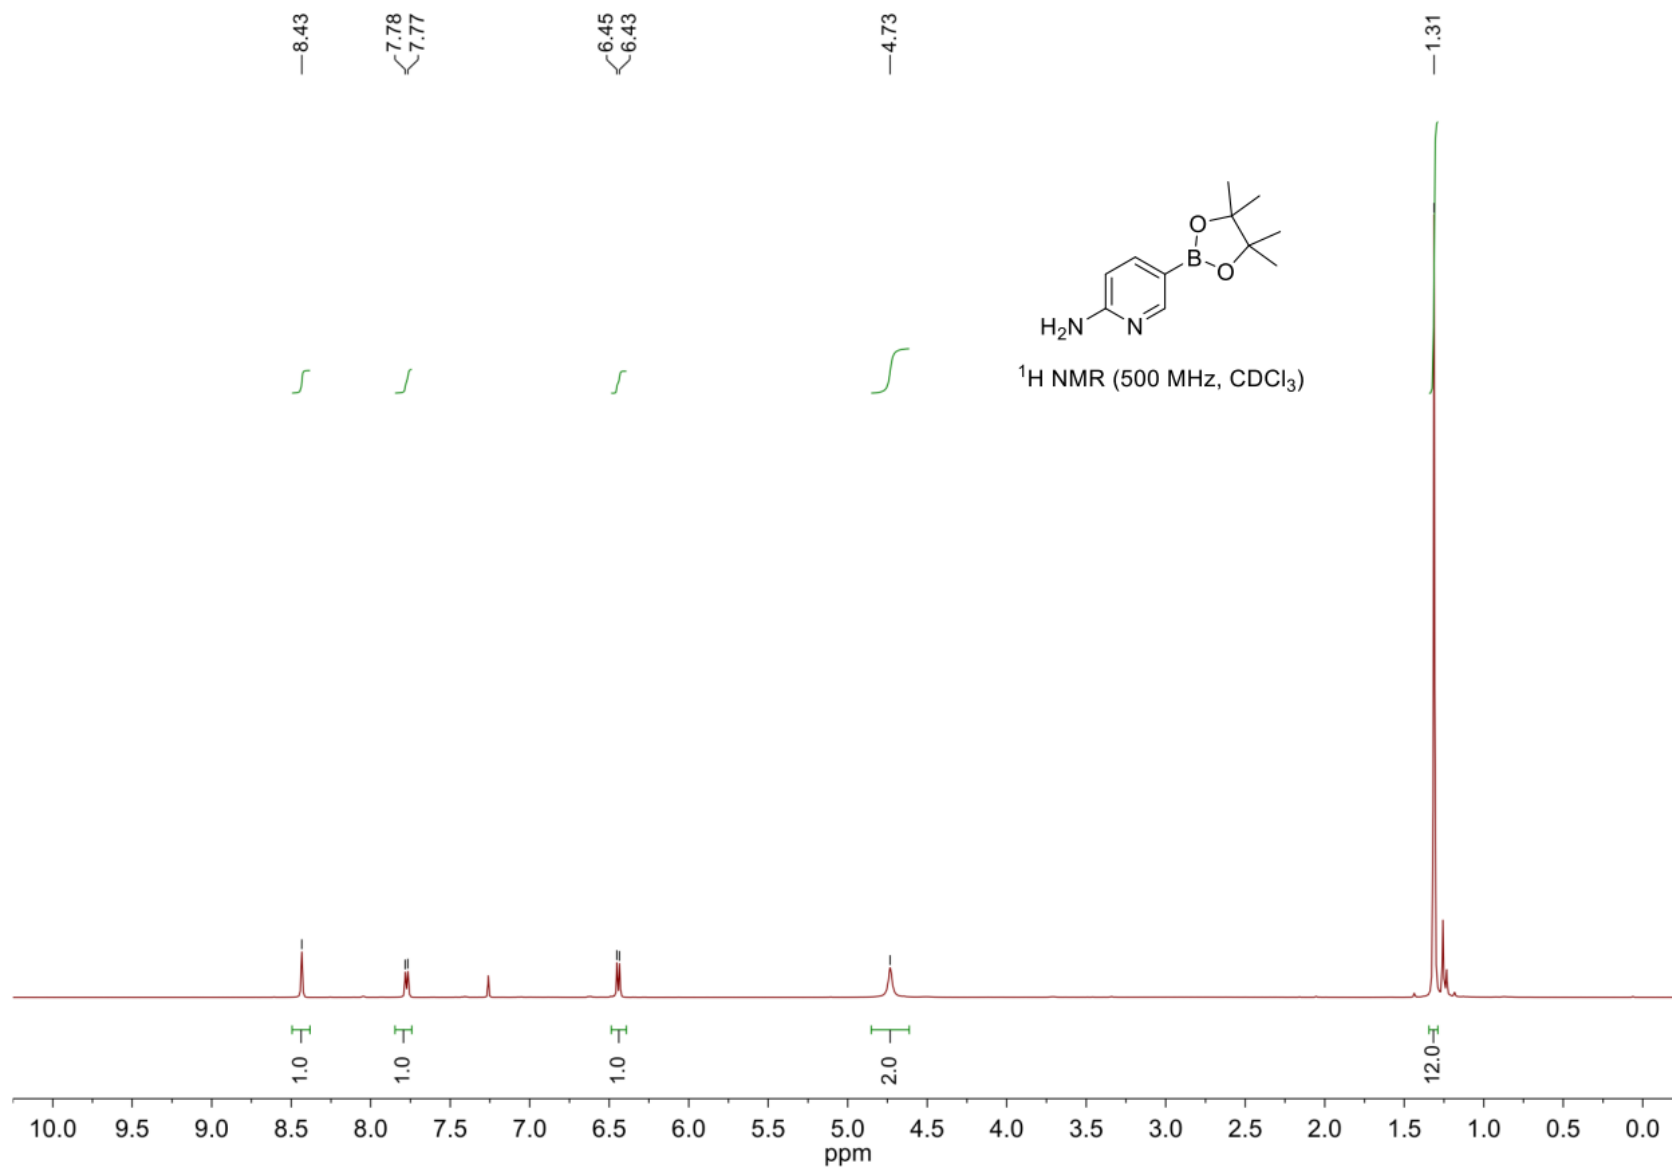

S423

# 5-(4,4,5,5-Tetramethyl-1,3,2-dioxaborolan-2-yl)pyridin-2-amine (75)

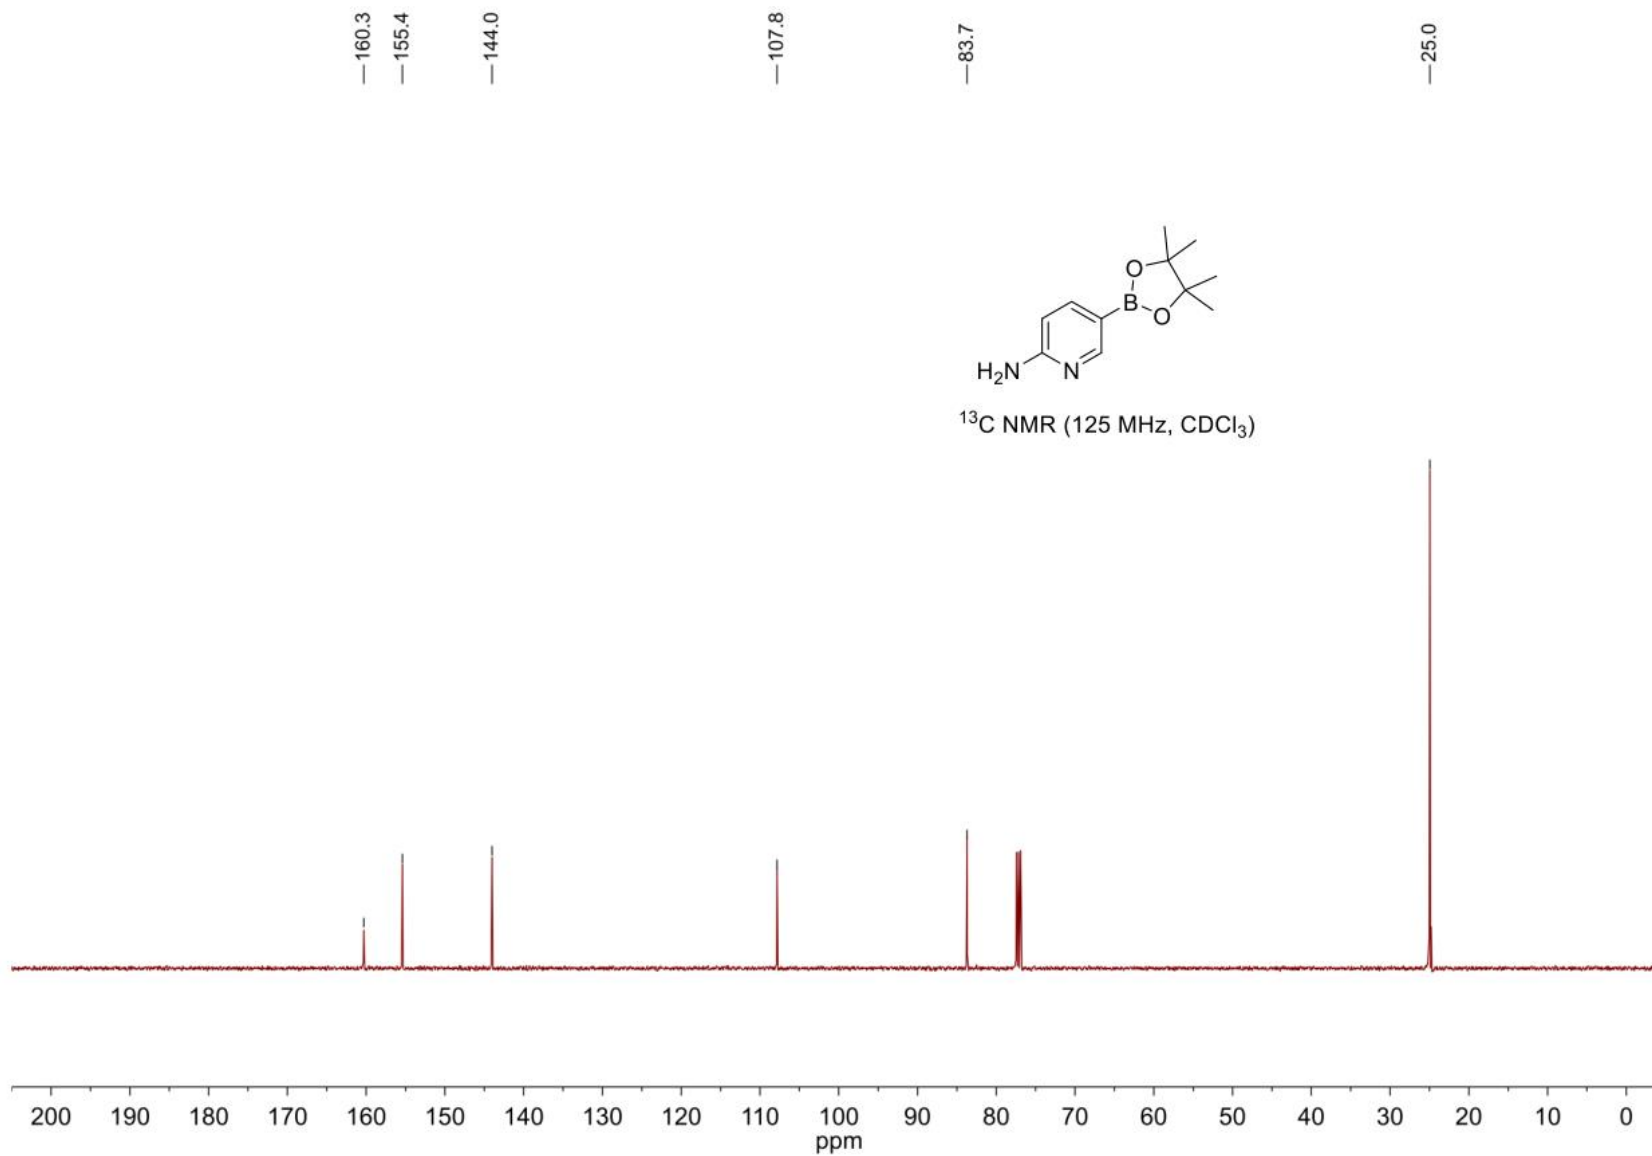



# 2-Methyl-4-(trifluoro- $\lambda^4$ -boraneyl)pyridine, potassium salt (76)

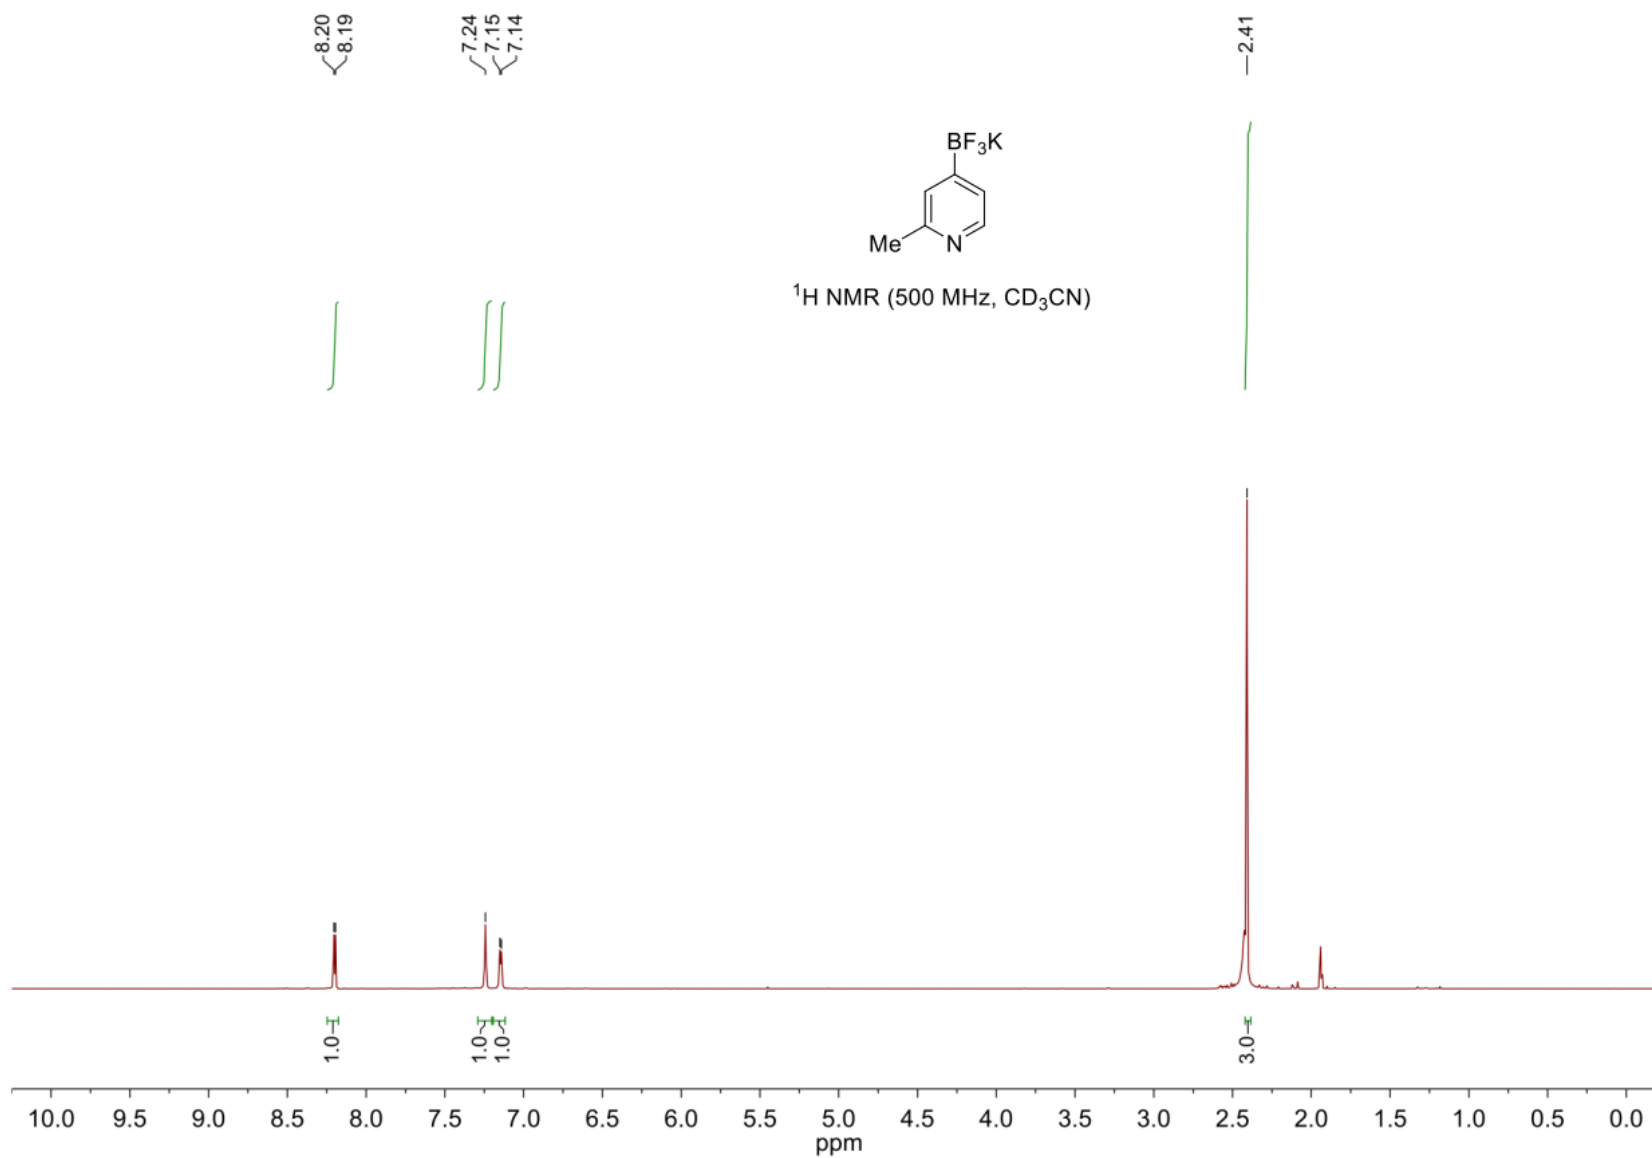

S425

## 2-Methyl-4-(trifluoro- $\lambda^4$ -boraneyl)pyridine, potassium salt (76)

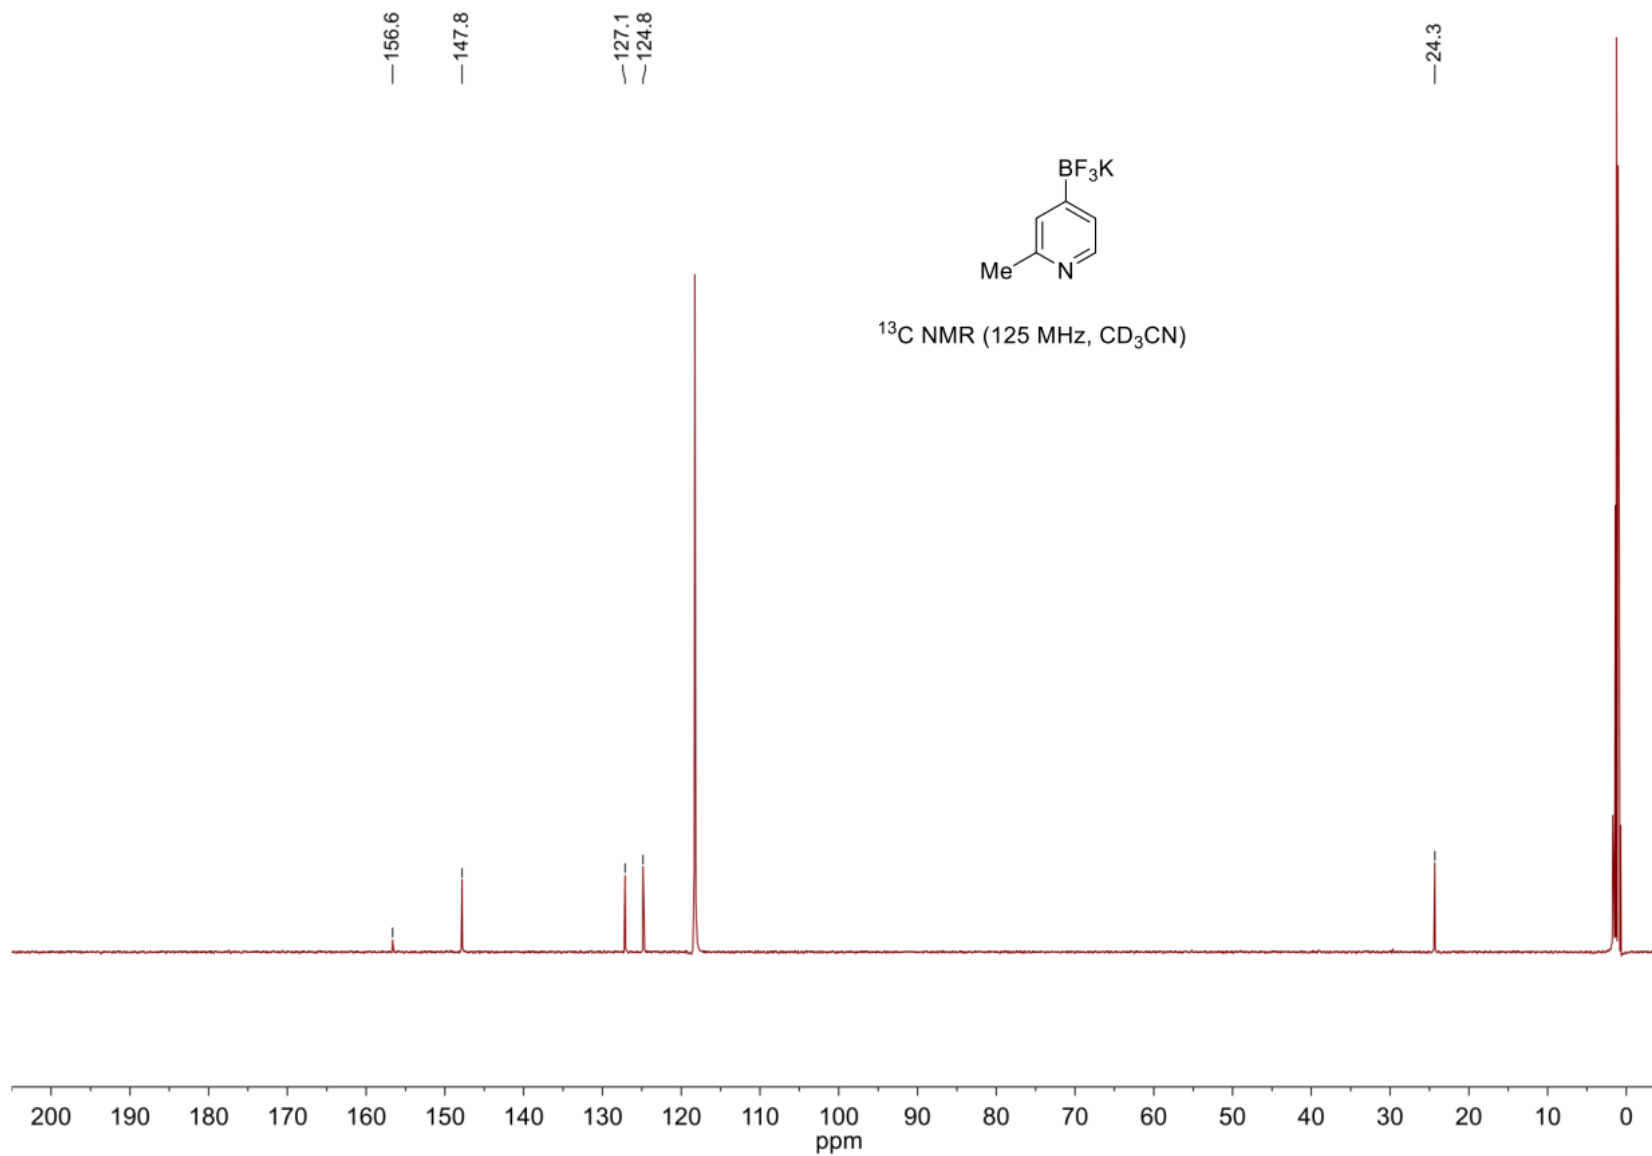

S426

# 4-Methyl-3-(trifluoro- $\lambda^4$ -boraneyl)pyridine, potassium salt (77)

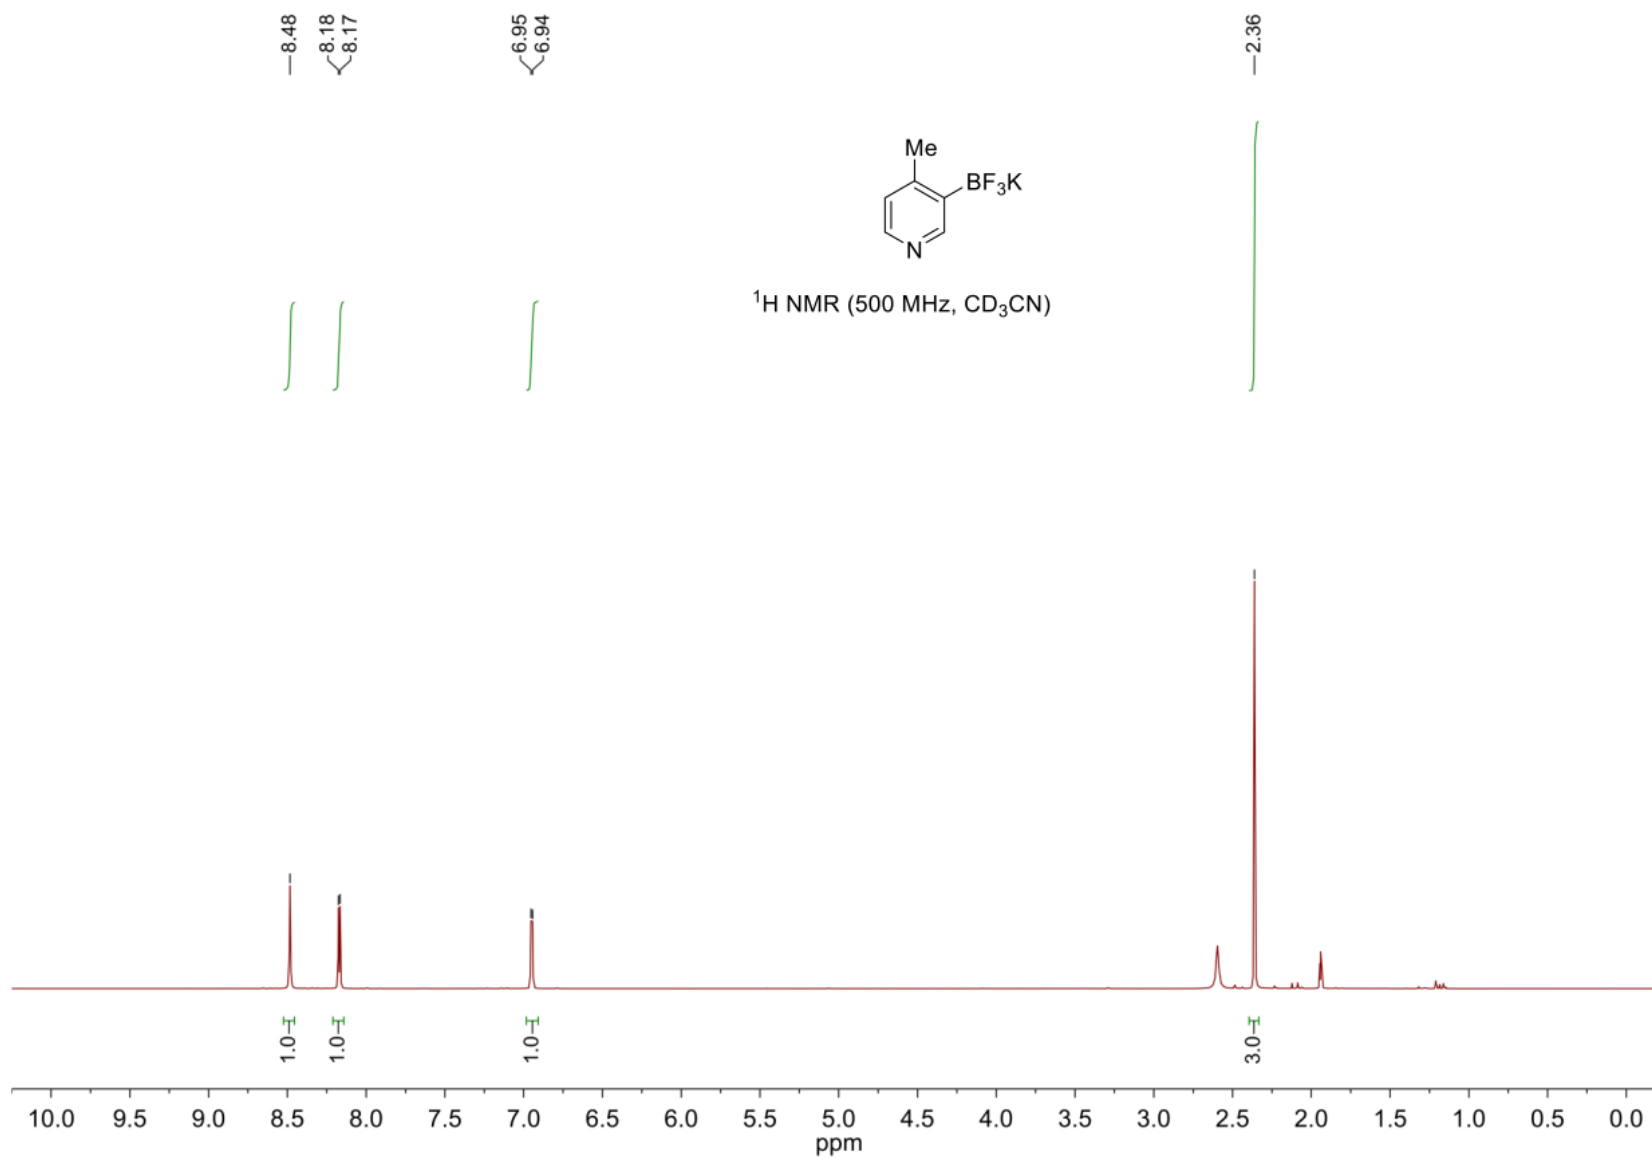

S427

# 4-Methyl-3-(trifluoro- $\lambda^4$ -boraneyl)pyridine, potassium salt (77)

153.4  
151.4  
147.9

125.2

21.3

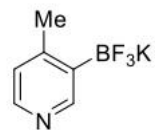

$^{13}\text{C}$  NMR (125 MHz,  $\text{CD}_3\text{CN}$ )

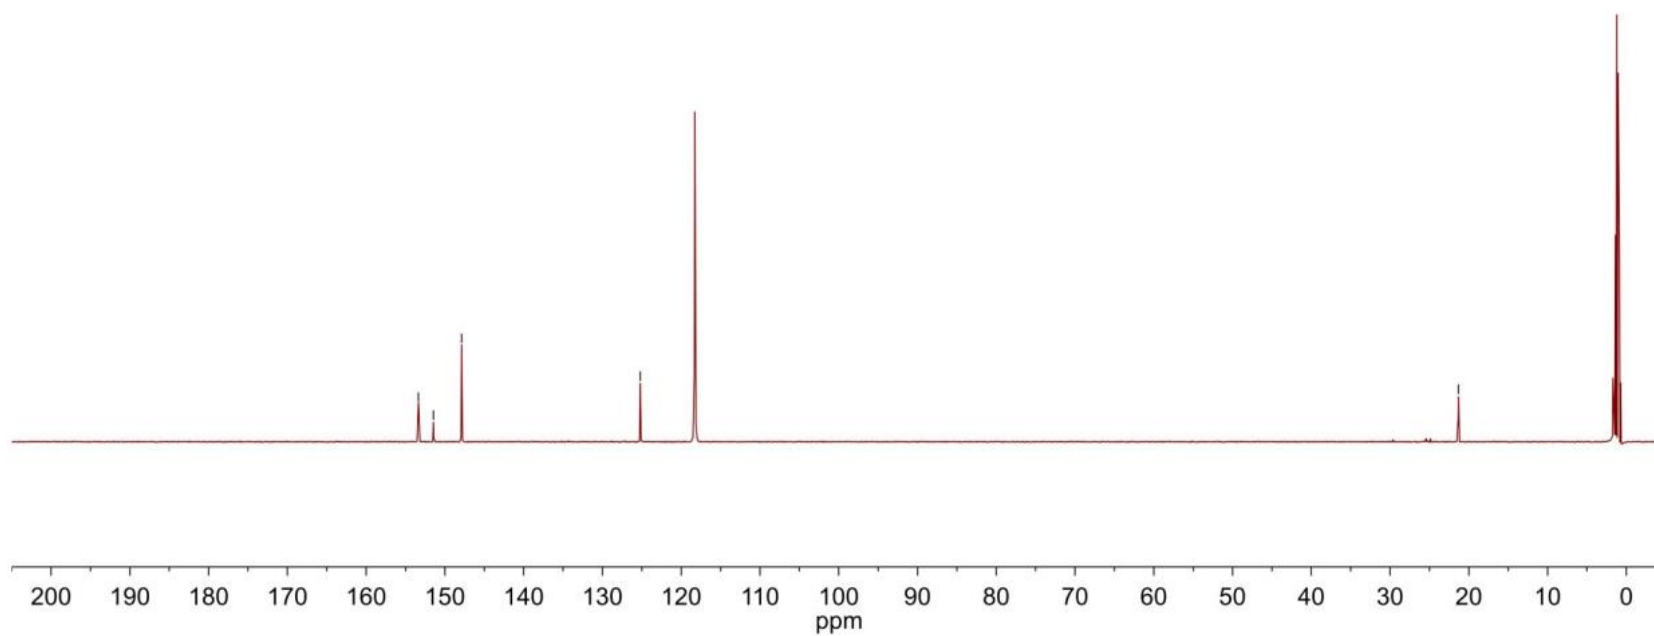

### 3-Fluoro-5-(trifluoro- $\lambda^4$ -boraneyl)pyridine, potassium salt (78)

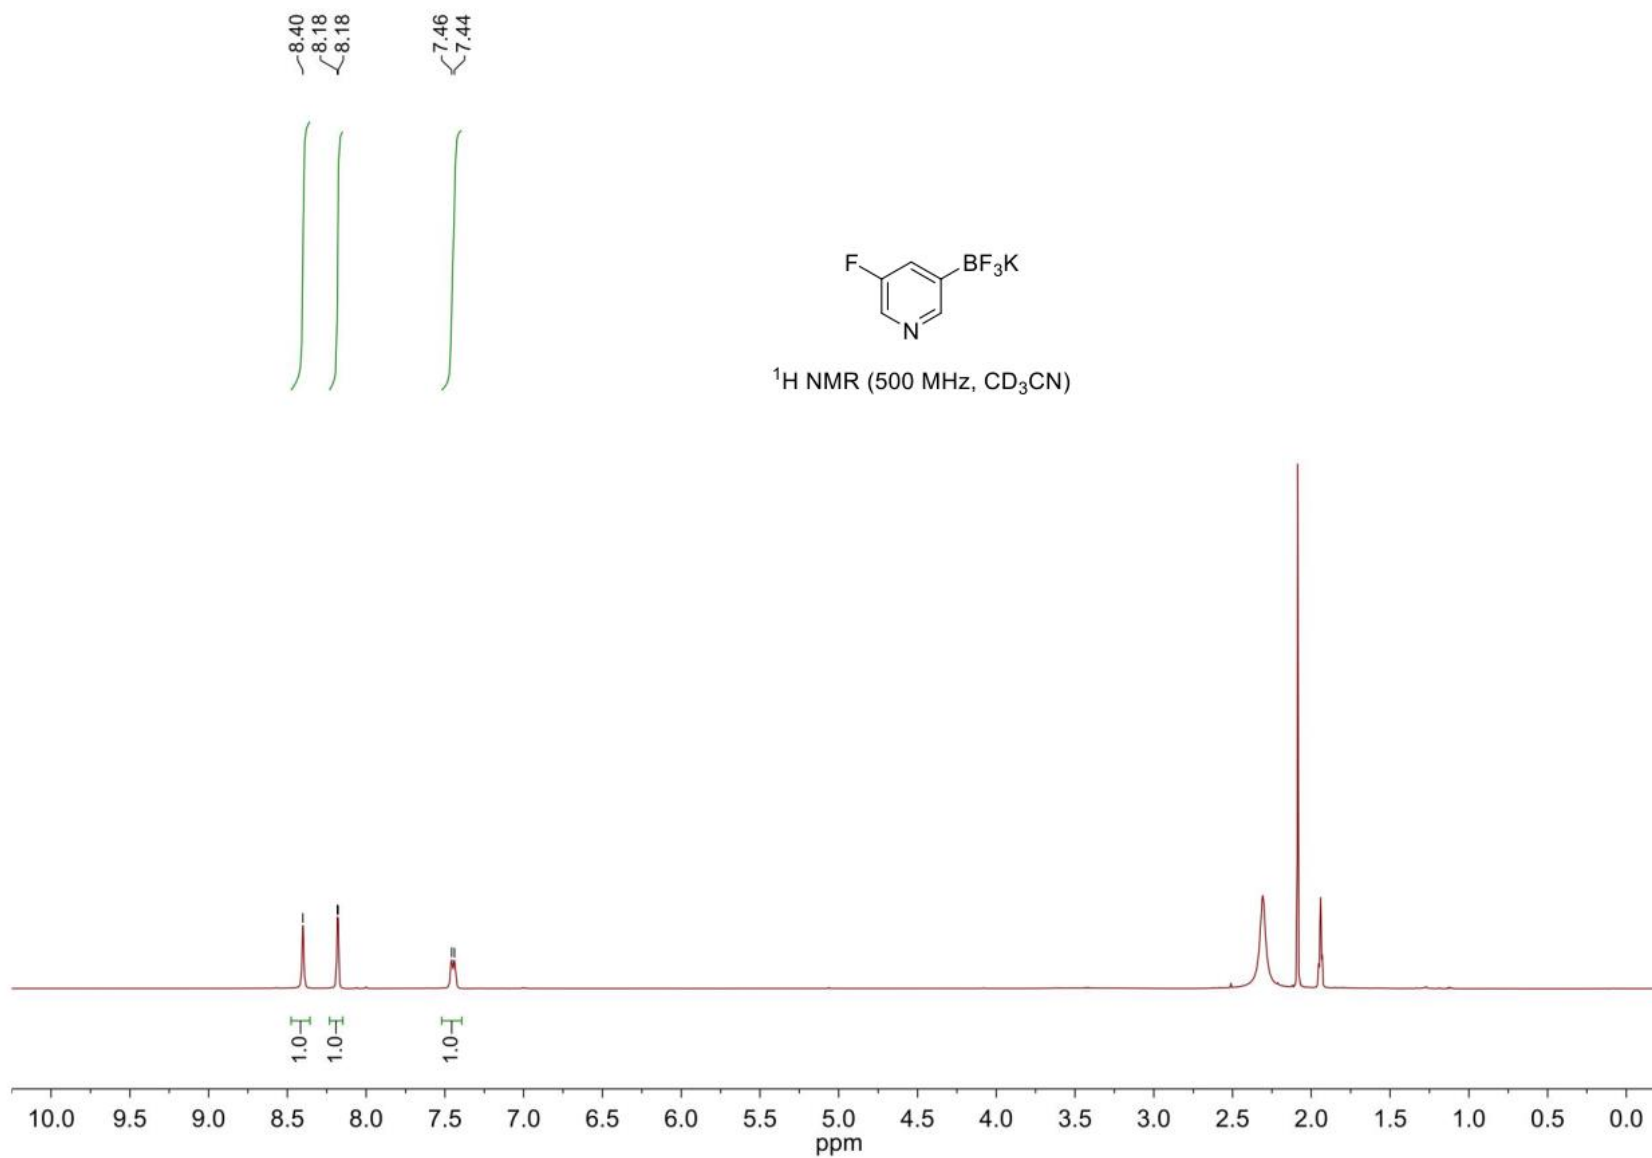

### 3-Fluoro-5-(trifluoro- $\lambda^4$ -boraneyl)pyridine, potassium salt (78)

161.9  
159.9  
149.7  
135.4  
135.2  
125.6  
125.5

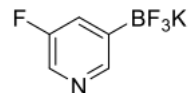

$^{13}\text{C}$  NMR (125 MHz,  $\text{CD}_3\text{CN}$ )

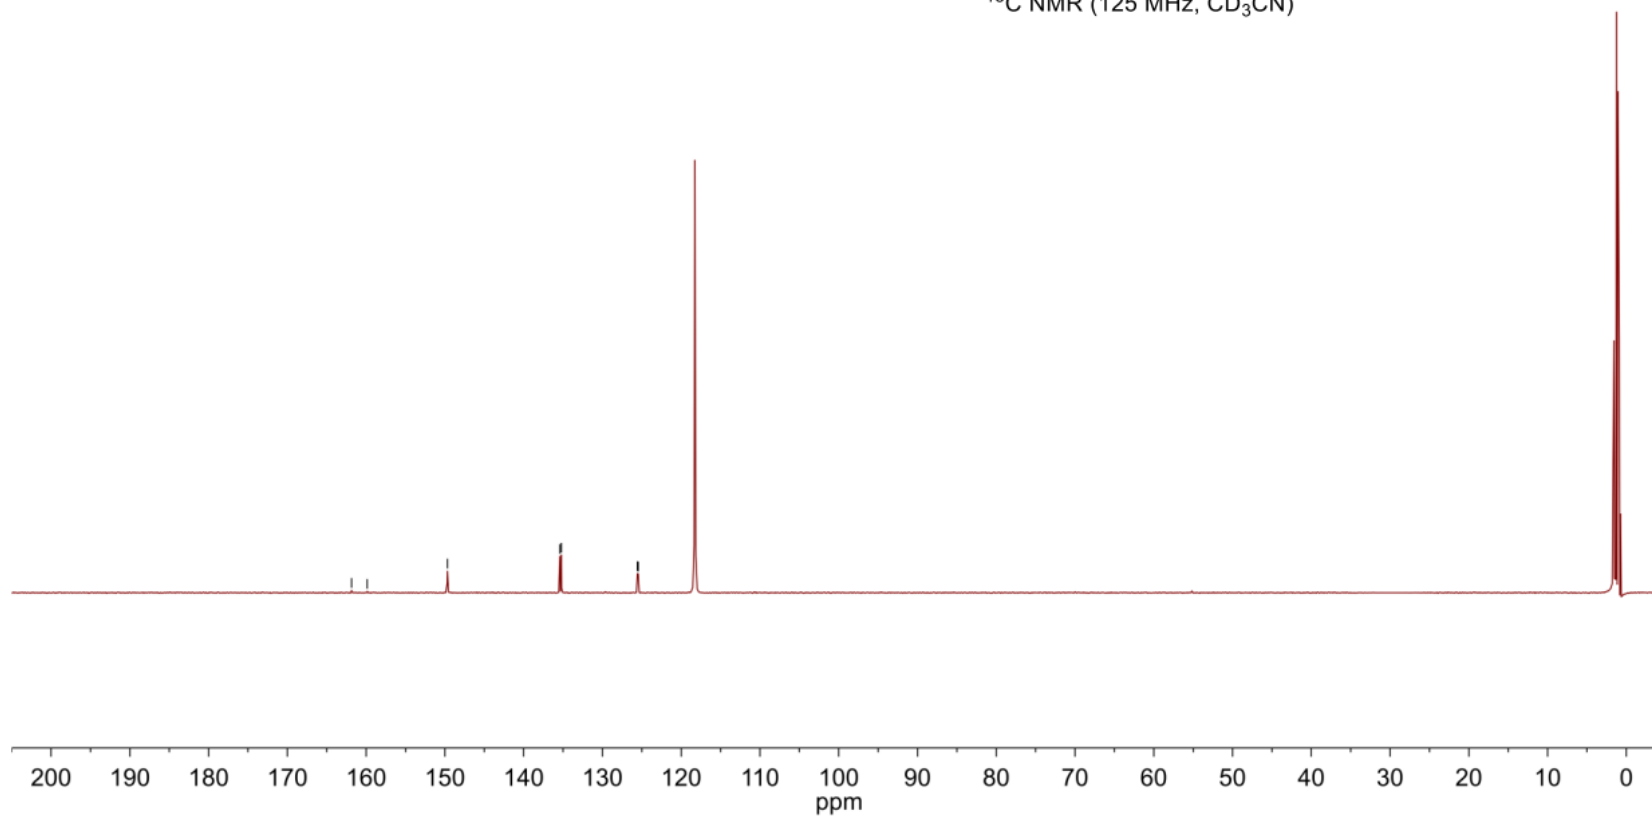

2-Fluoro-5-(trifluoro- $\lambda^4$ -boraneyl)pyridine, potassium salt (79)

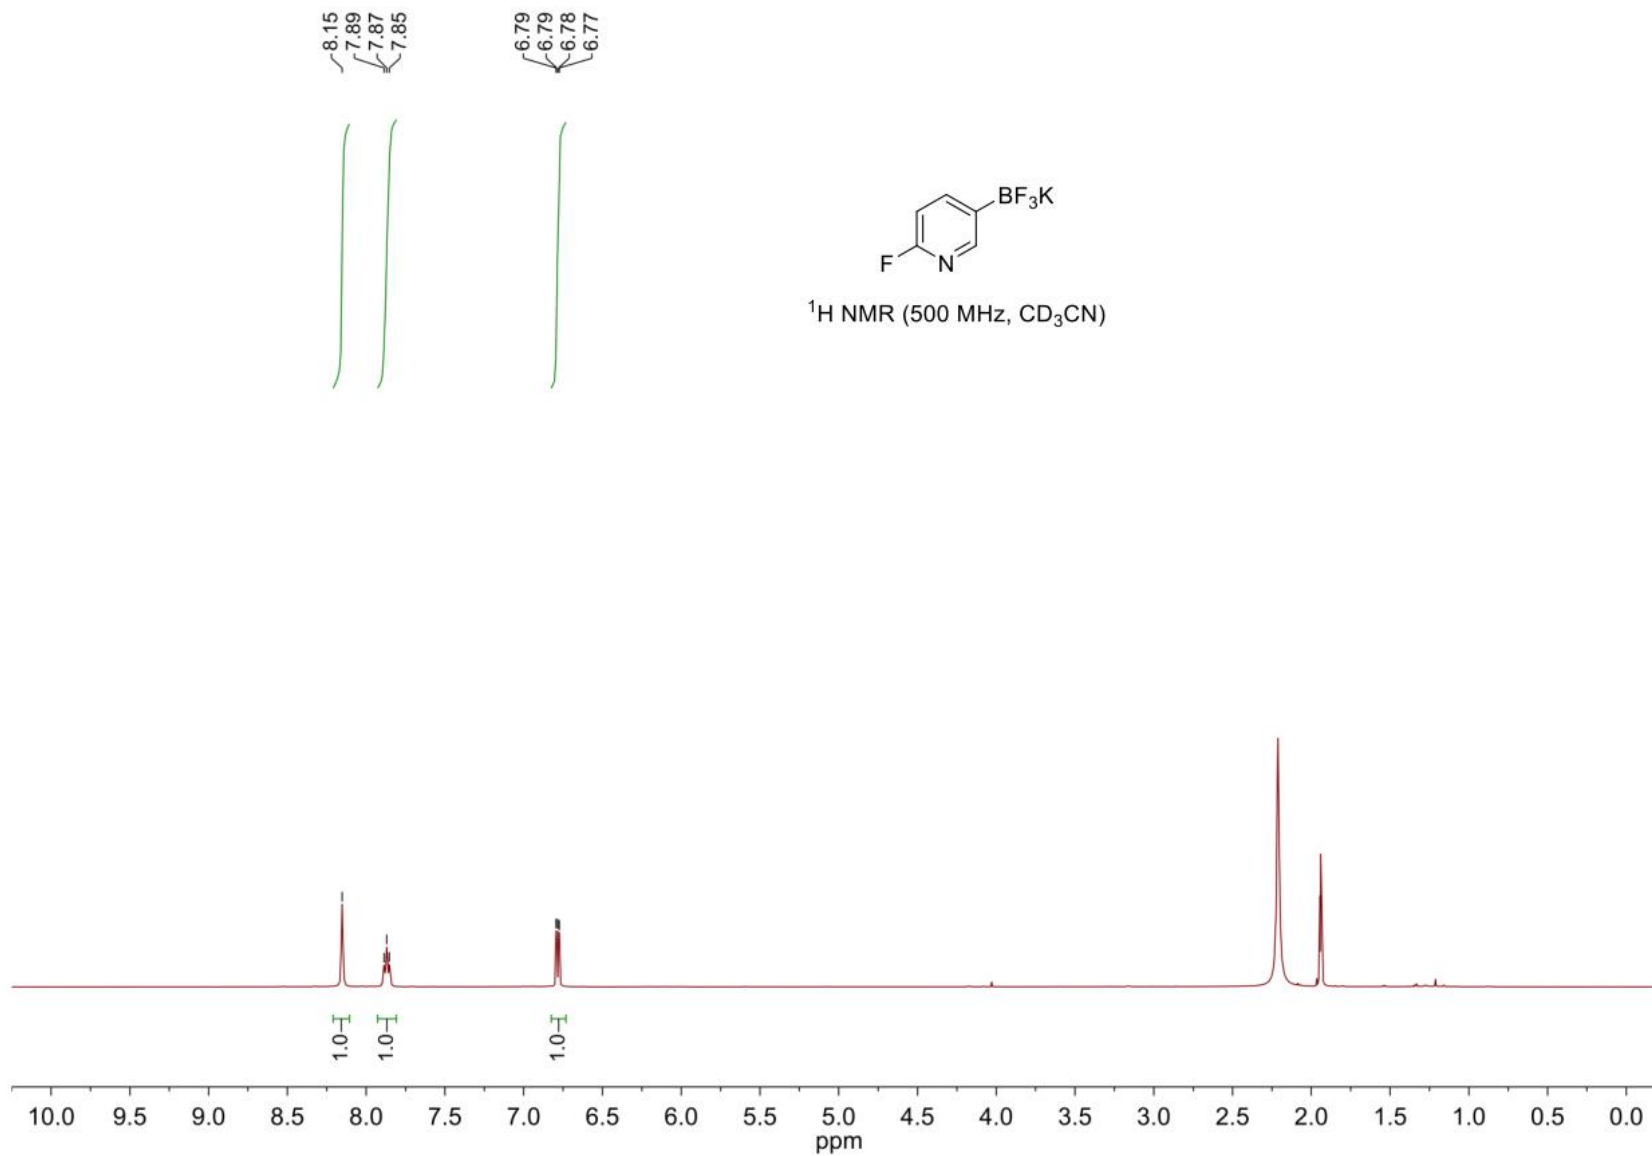

## 2-Fluoro-5-(trifluoro- $\lambda^4$ -boraneyl)pyridine, potassium salt (79)

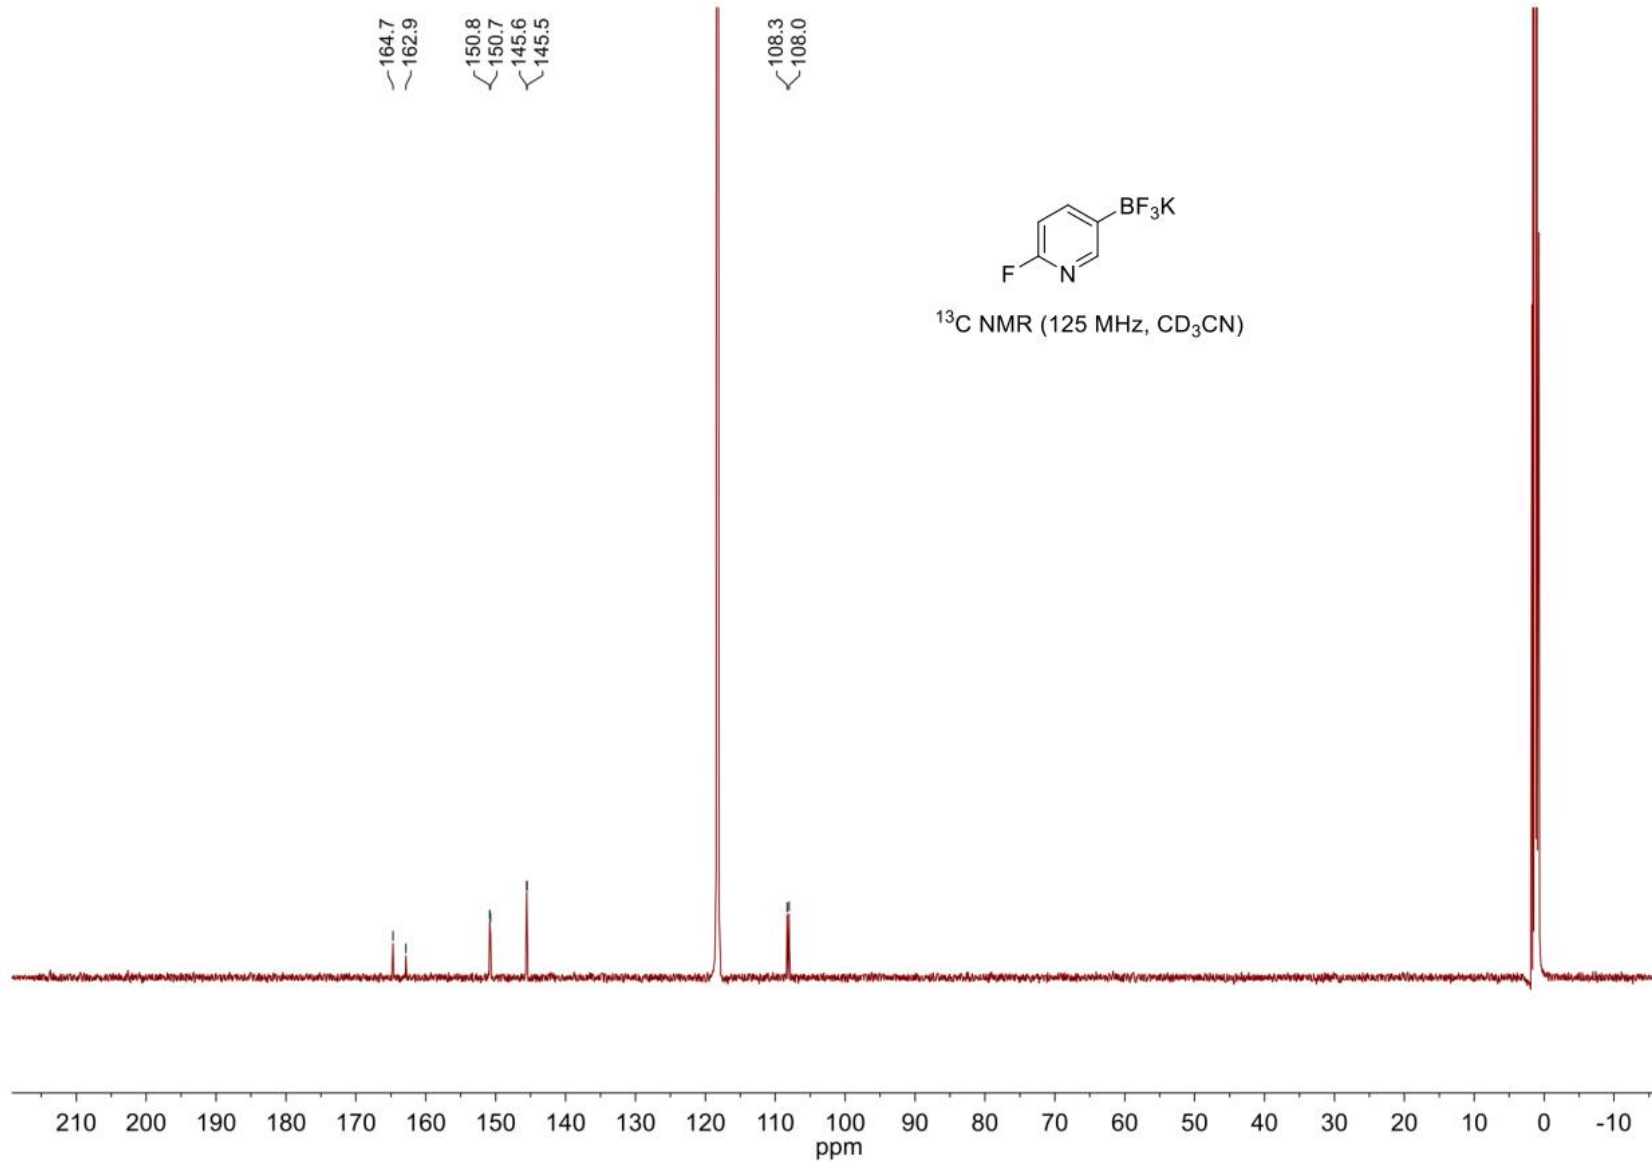

S432



# Methyl 5-(trifluoro- $\lambda^4$ -boraneyl)nicotinate, potassium salt (80)

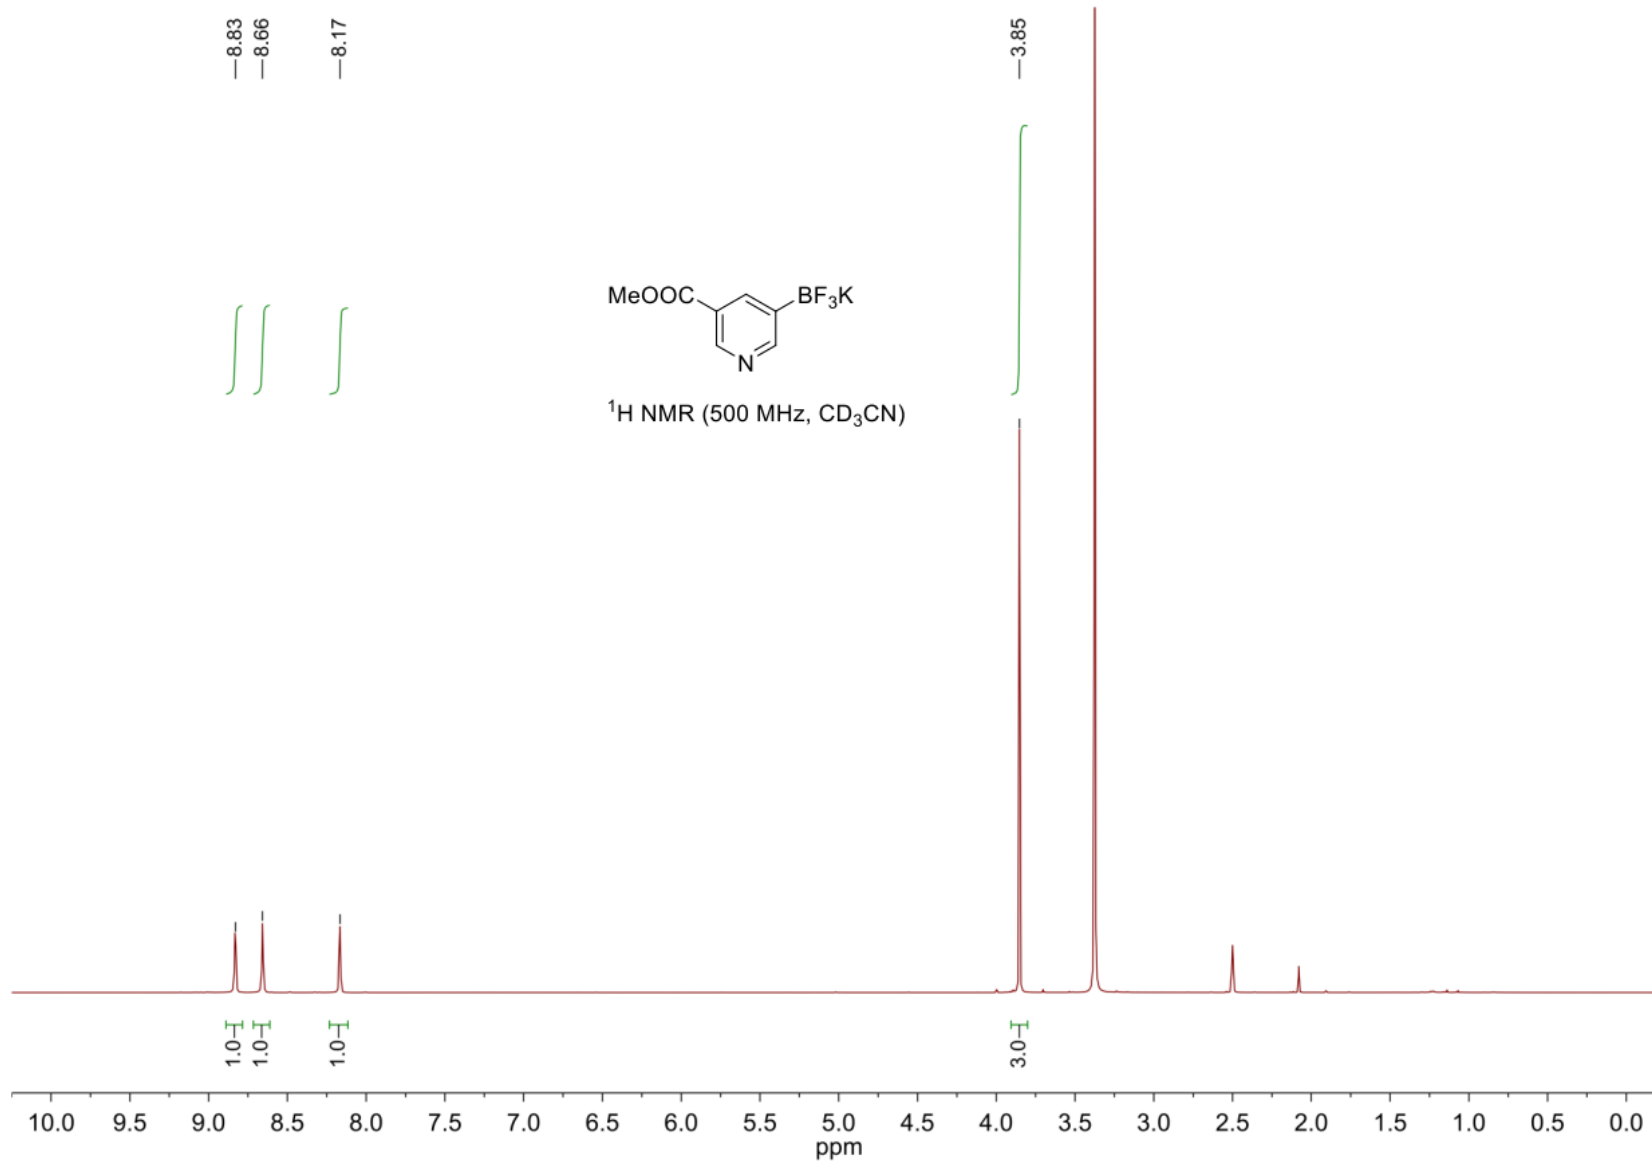

# Methyl 5-(trifluoro- $\lambda^4$ -boraneyl)nicotinate, potassium salt (80)

—166.5  
—156.5  
—147.4  
—139.4  
—124.1  
  
—52.0

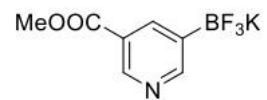

$^{13}\text{C}$  NMR (125 MHz,  $\text{CD}_3\text{CN}$ )

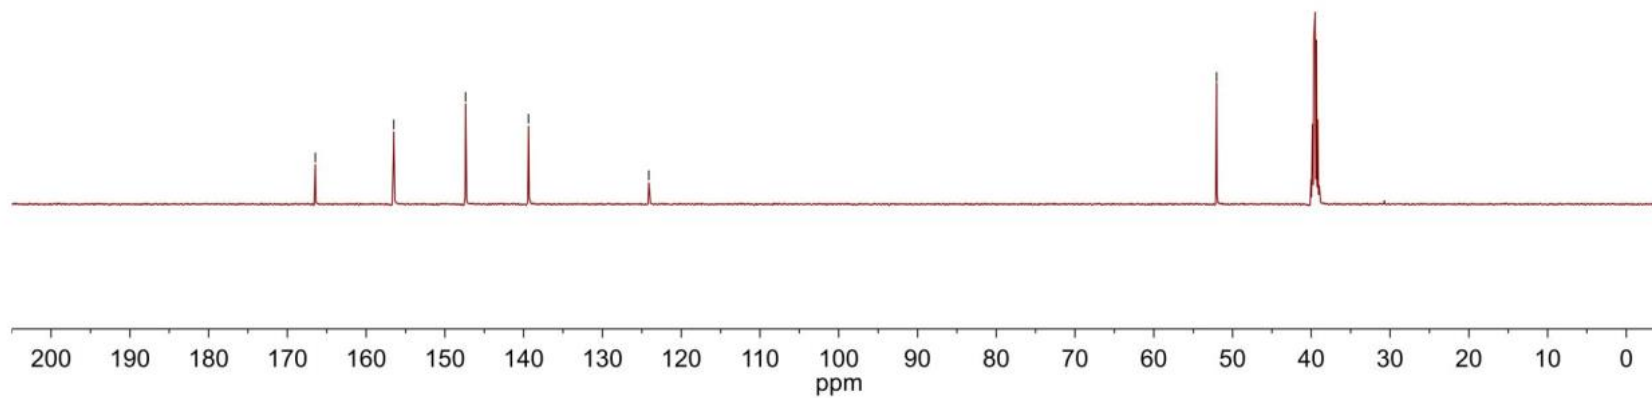

# Methyl 6-(trifluoro- $\lambda^4$ -boraneyl)picolinate, potassium salt (81)

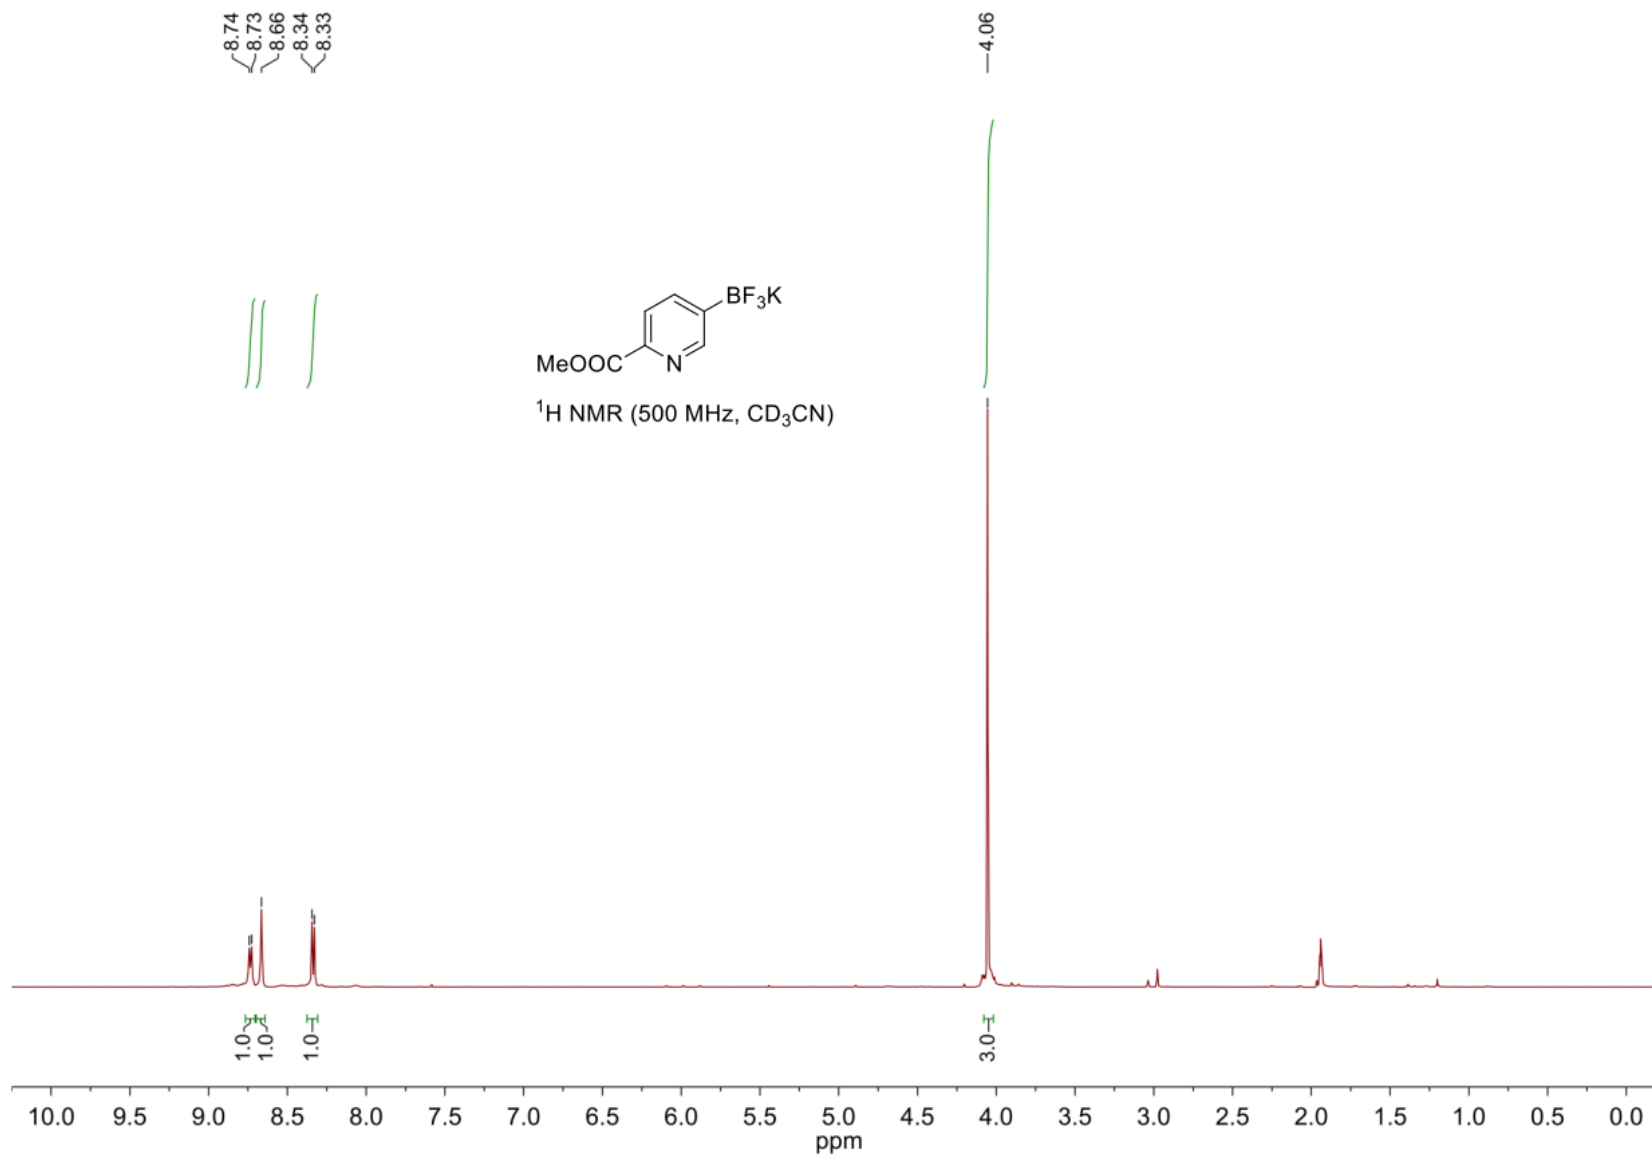

S435

# Methyl 6-(trifluoro- $\lambda^4$ -boraneyl)picolinate, potassium salt (81)

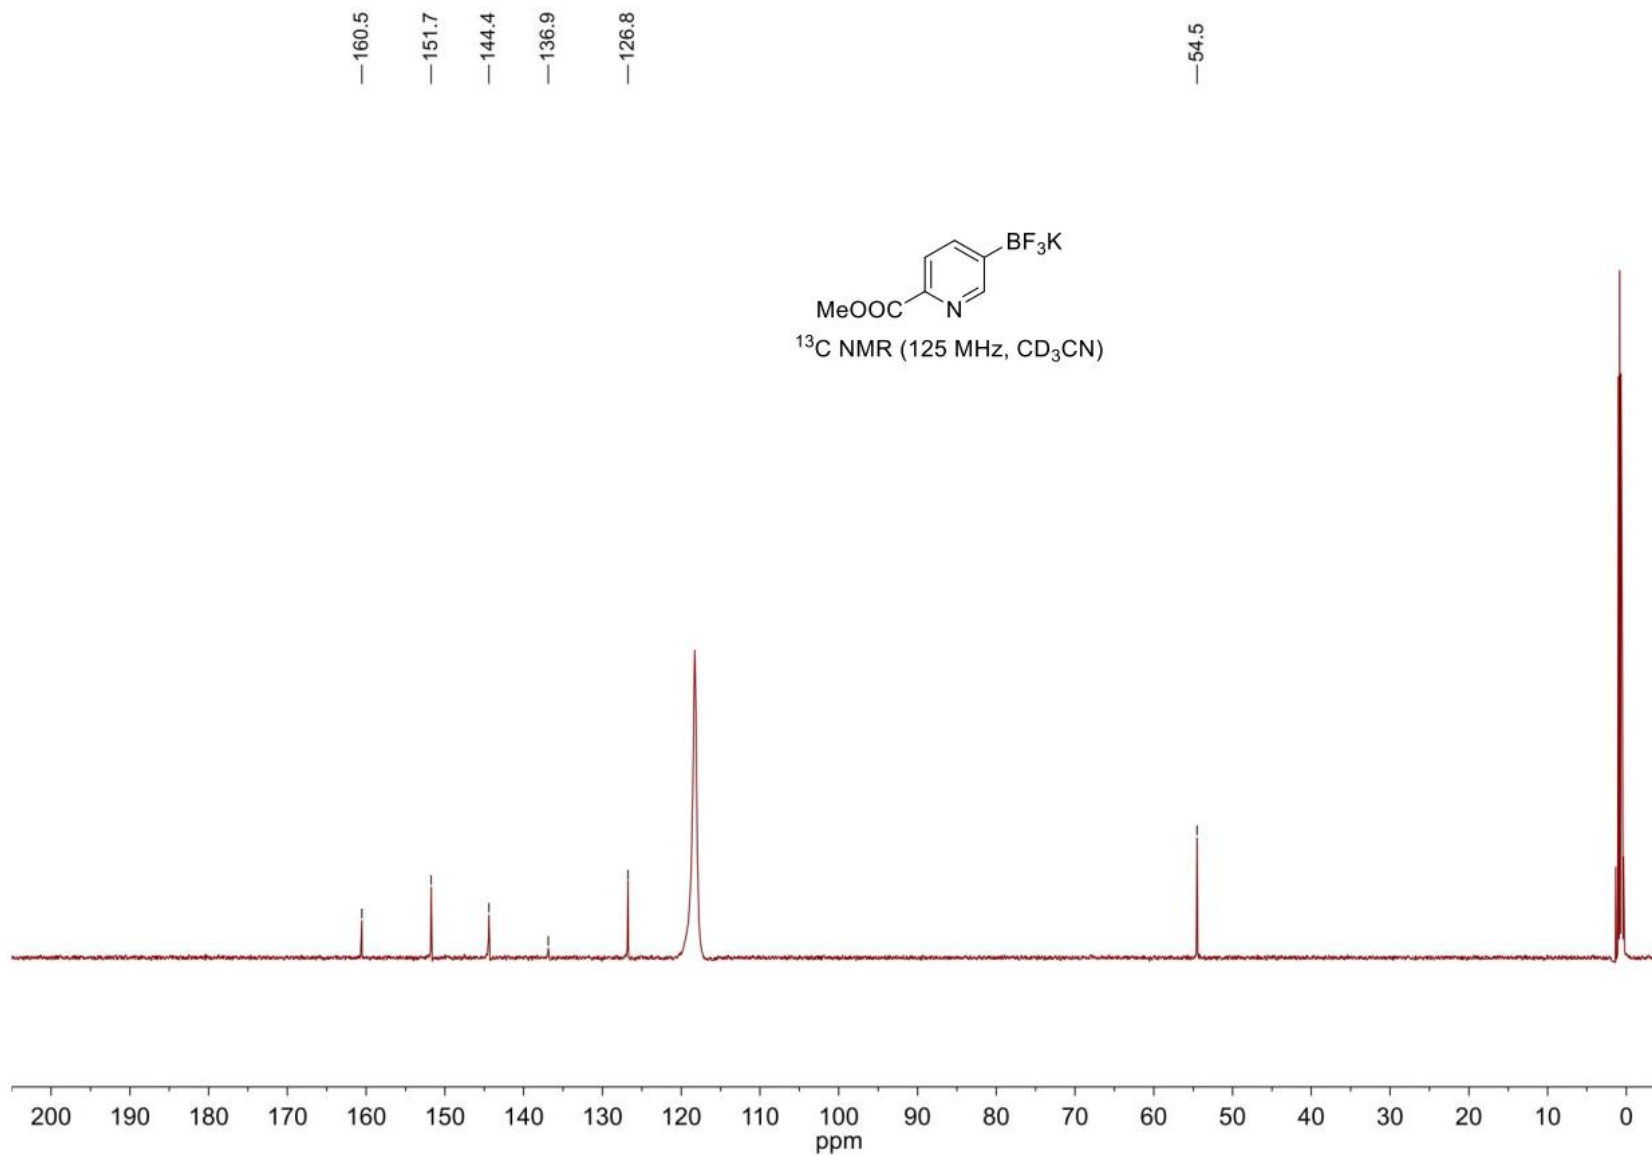

(6-Cyanopyridin-3-yl)boronic acid (82)

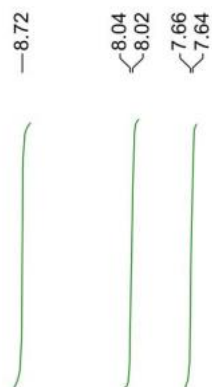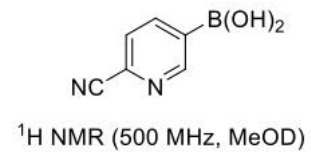

<sup>1</sup>H NMR (500 MHz, MeOD)

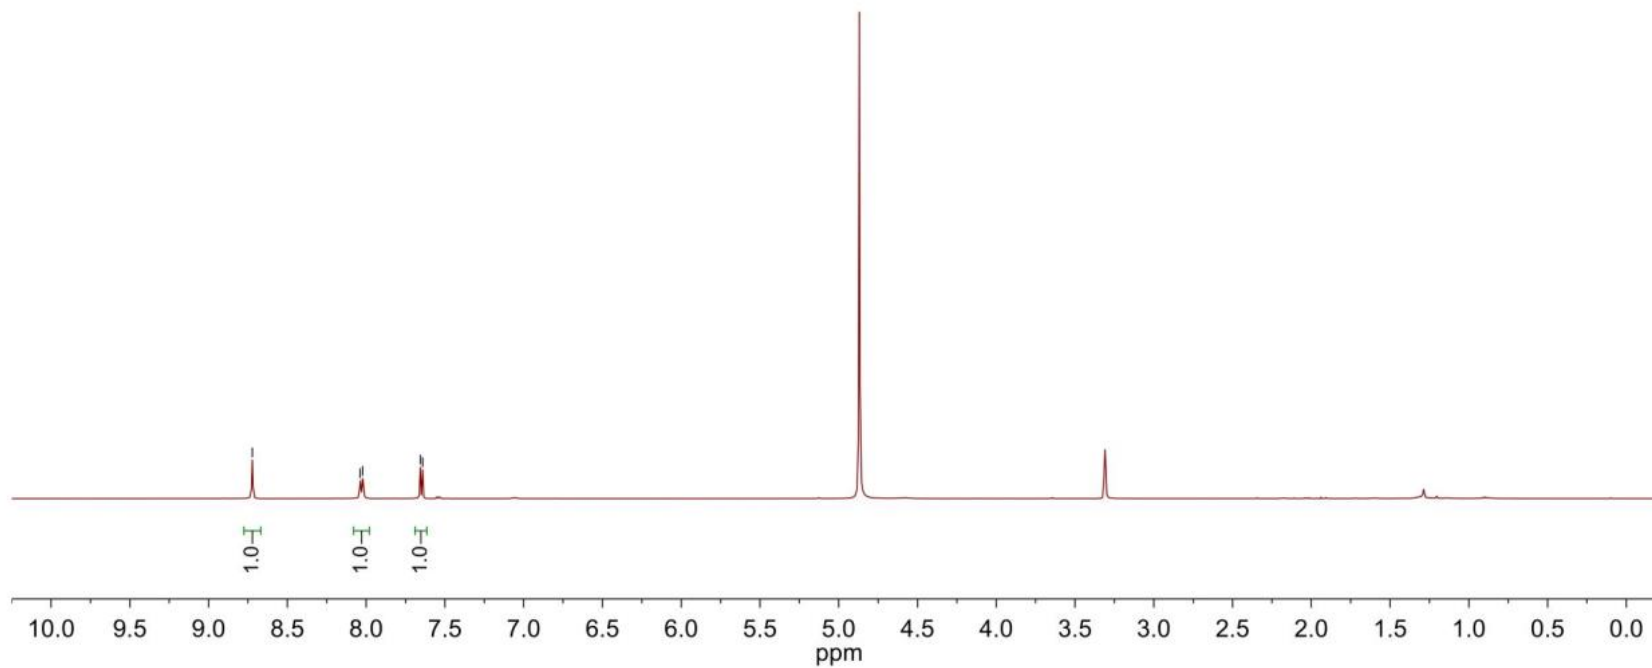

S437

(6-Cyanopyridin-3-yl)boronic acid (82)

—156.6  
—143.5  
—130.4  
—128.5  
—119.1

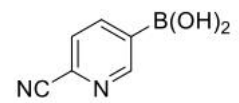

<sup>13</sup>C NMR (125 MHz, MeOD)

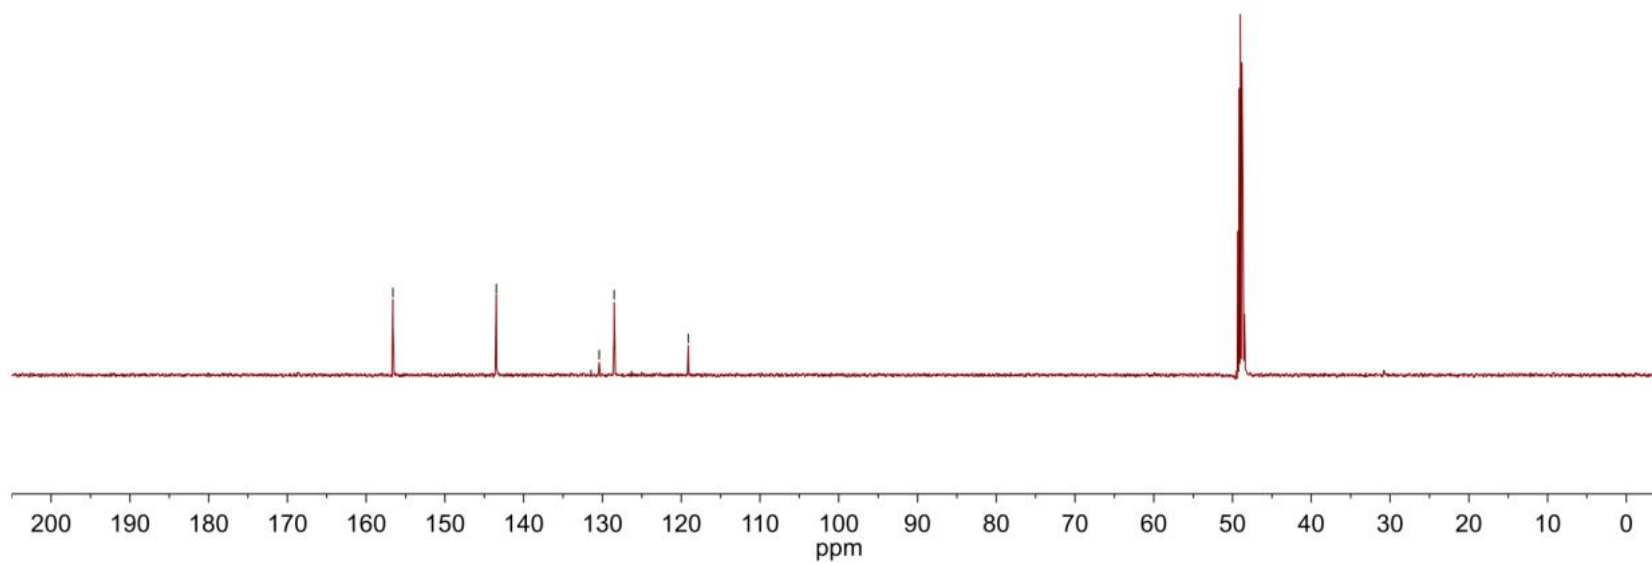

3-(Trifluoro- $\lambda^4$ -boraneyl)-5-(trifluoromethyl)pyridine, potassium salt (83)

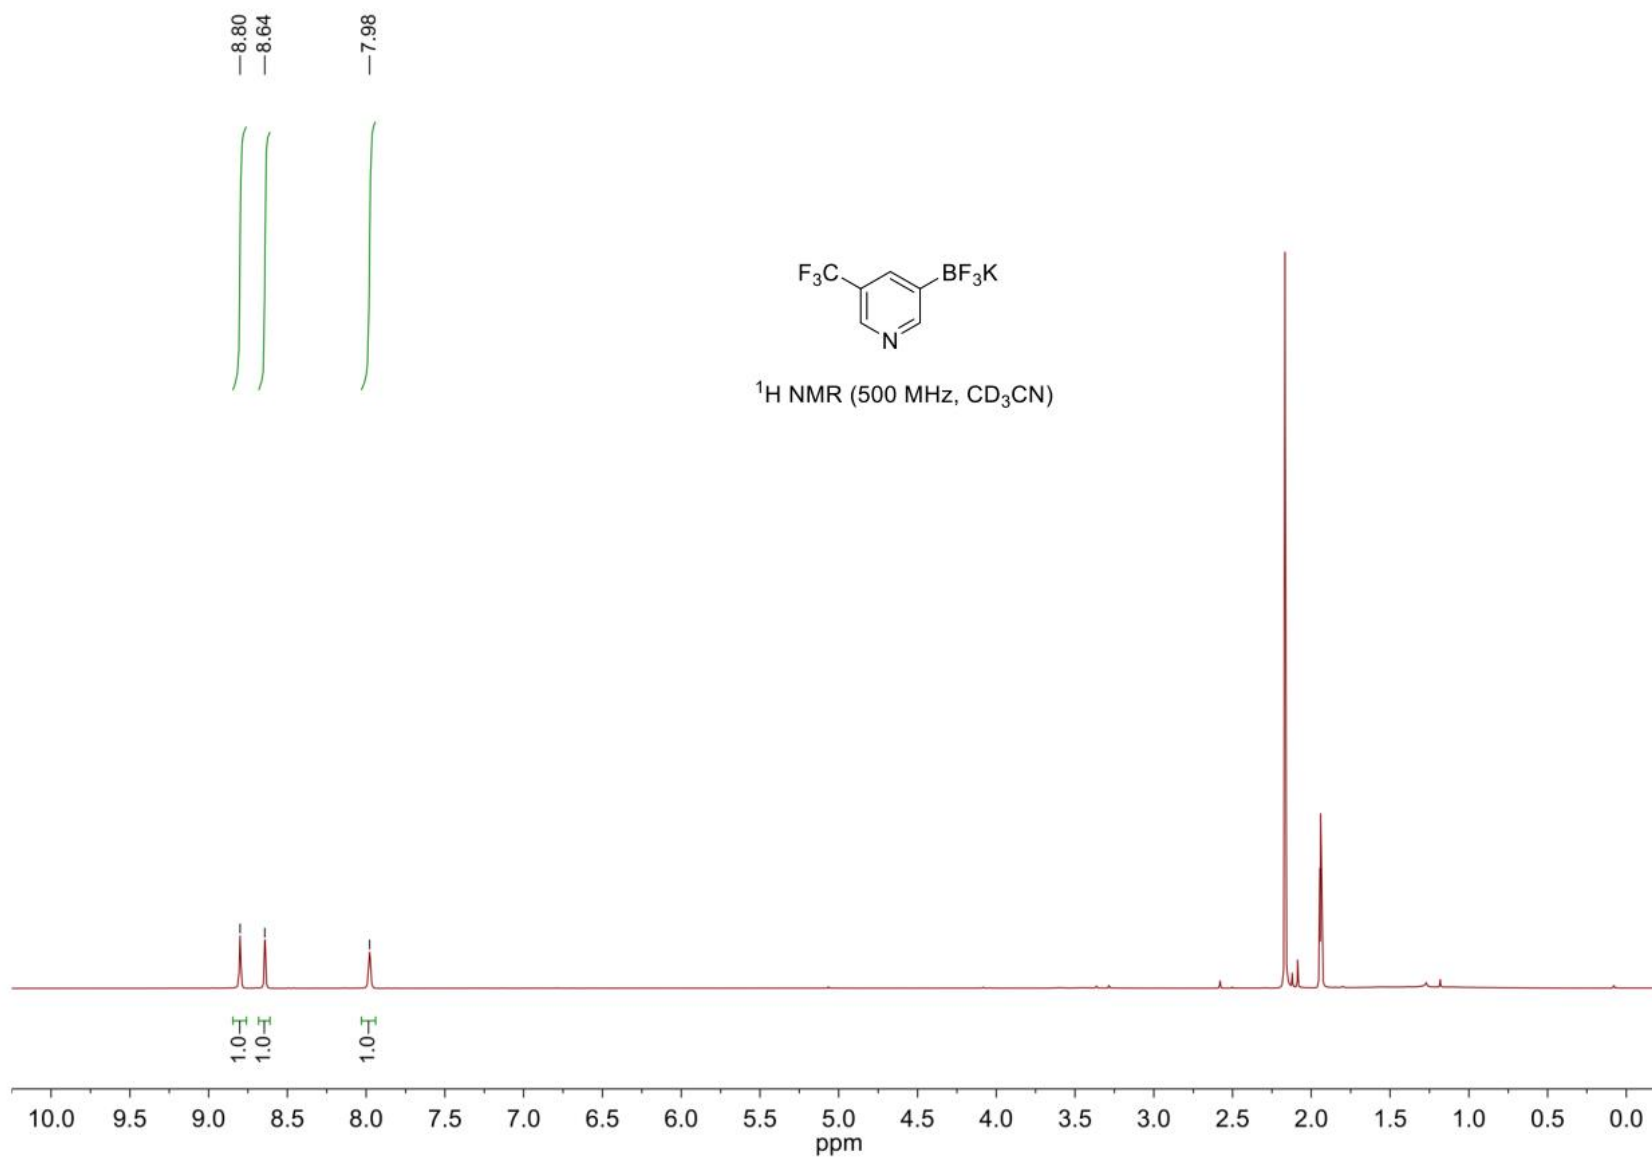

### 3-(Trifluoro- $\lambda^4$ -boraneyl)-5-(trifluoromethyl)pyridine, potassium salt (83)

150.5  
143.7  
139.8  
139.8  
128.7  
128.4  
128.1  
127.9  
127.2  
125.0  
122.9  
120.7

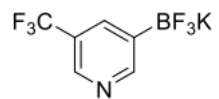

$^{13}\text{C}$  NMR (125 MHz,  $\text{CD}_3\text{CN}$ )

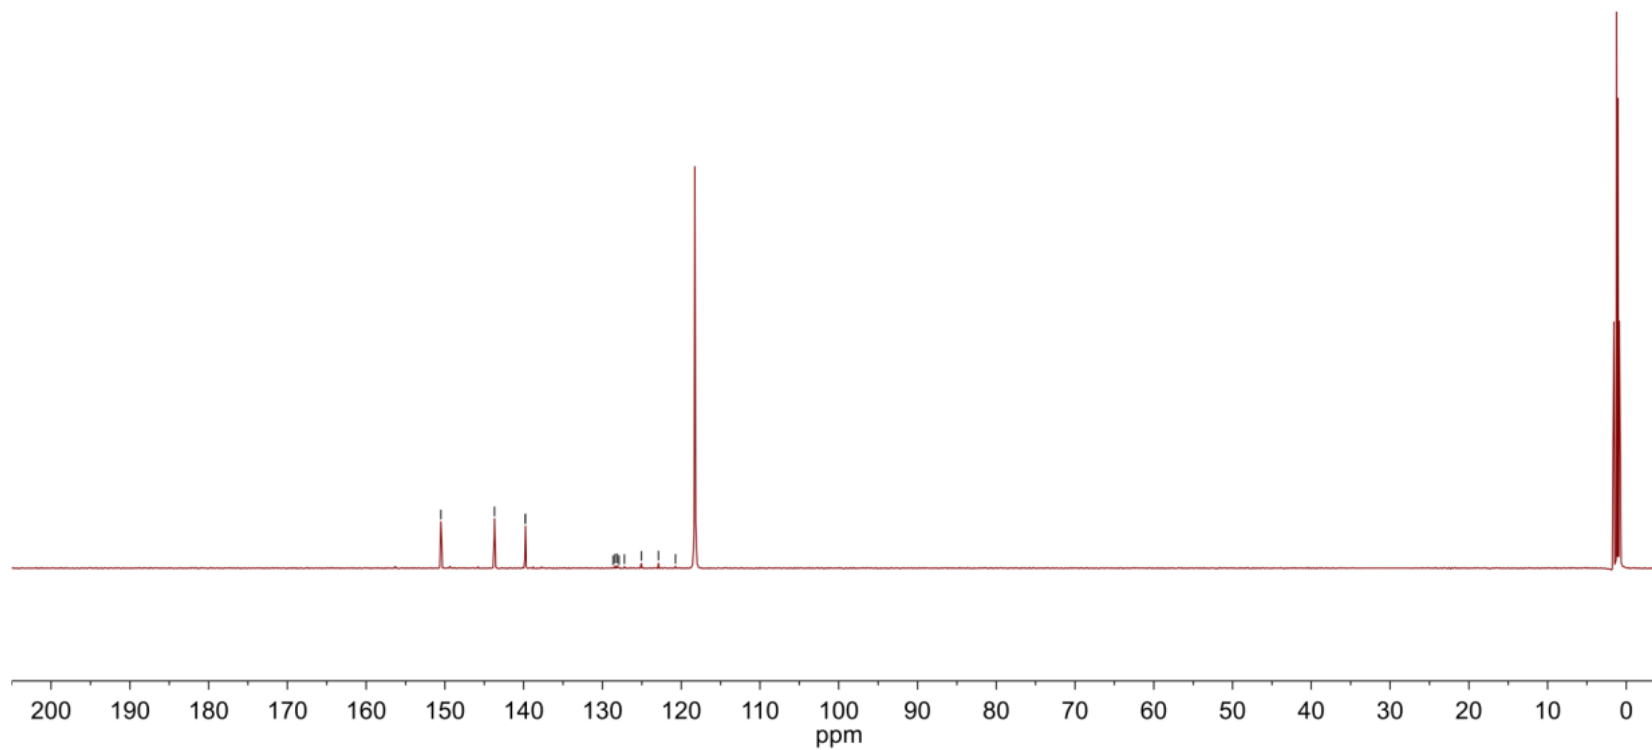



***N*-5-(Trifluoro- $\lambda^4$ -boraneyl)pyridin-2-yl)acetamide, potassium salt (84)**

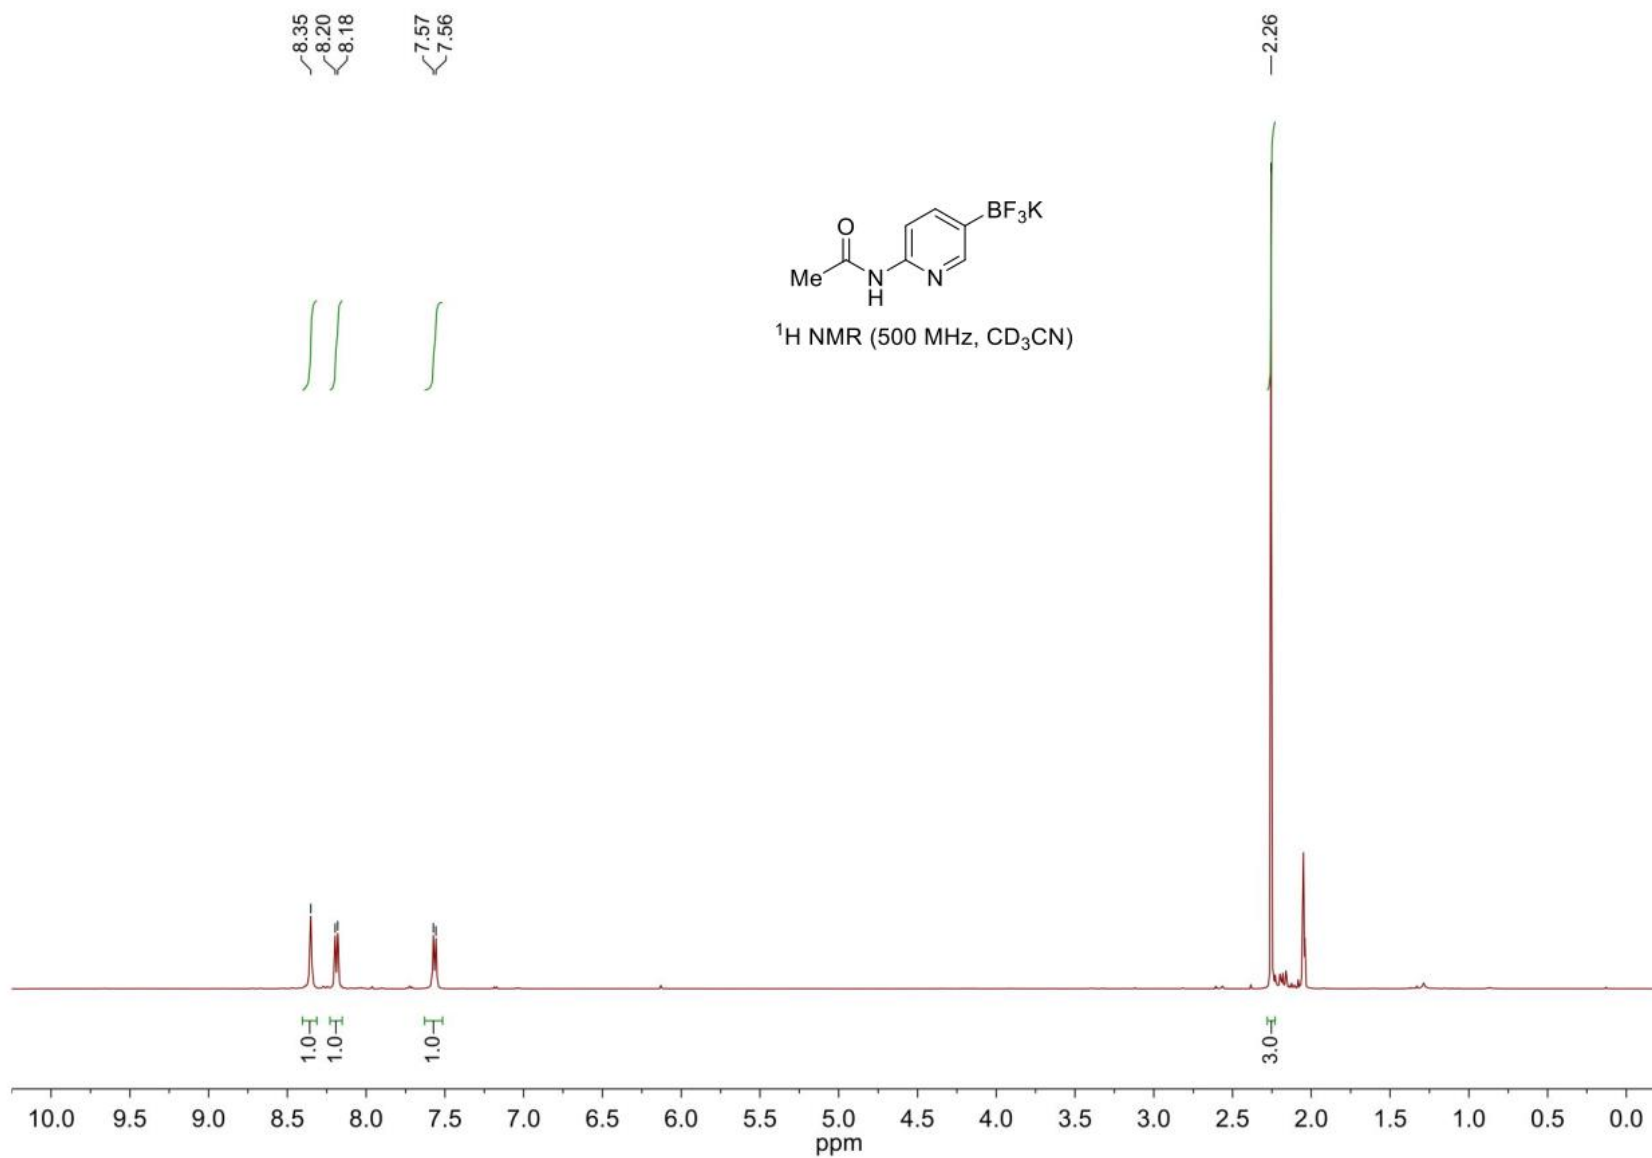

***N*-5-(Trifluoro- $\lambda^4$ -boraneyl)pyridin-2-yl)acetamide, potassium salt (84)**

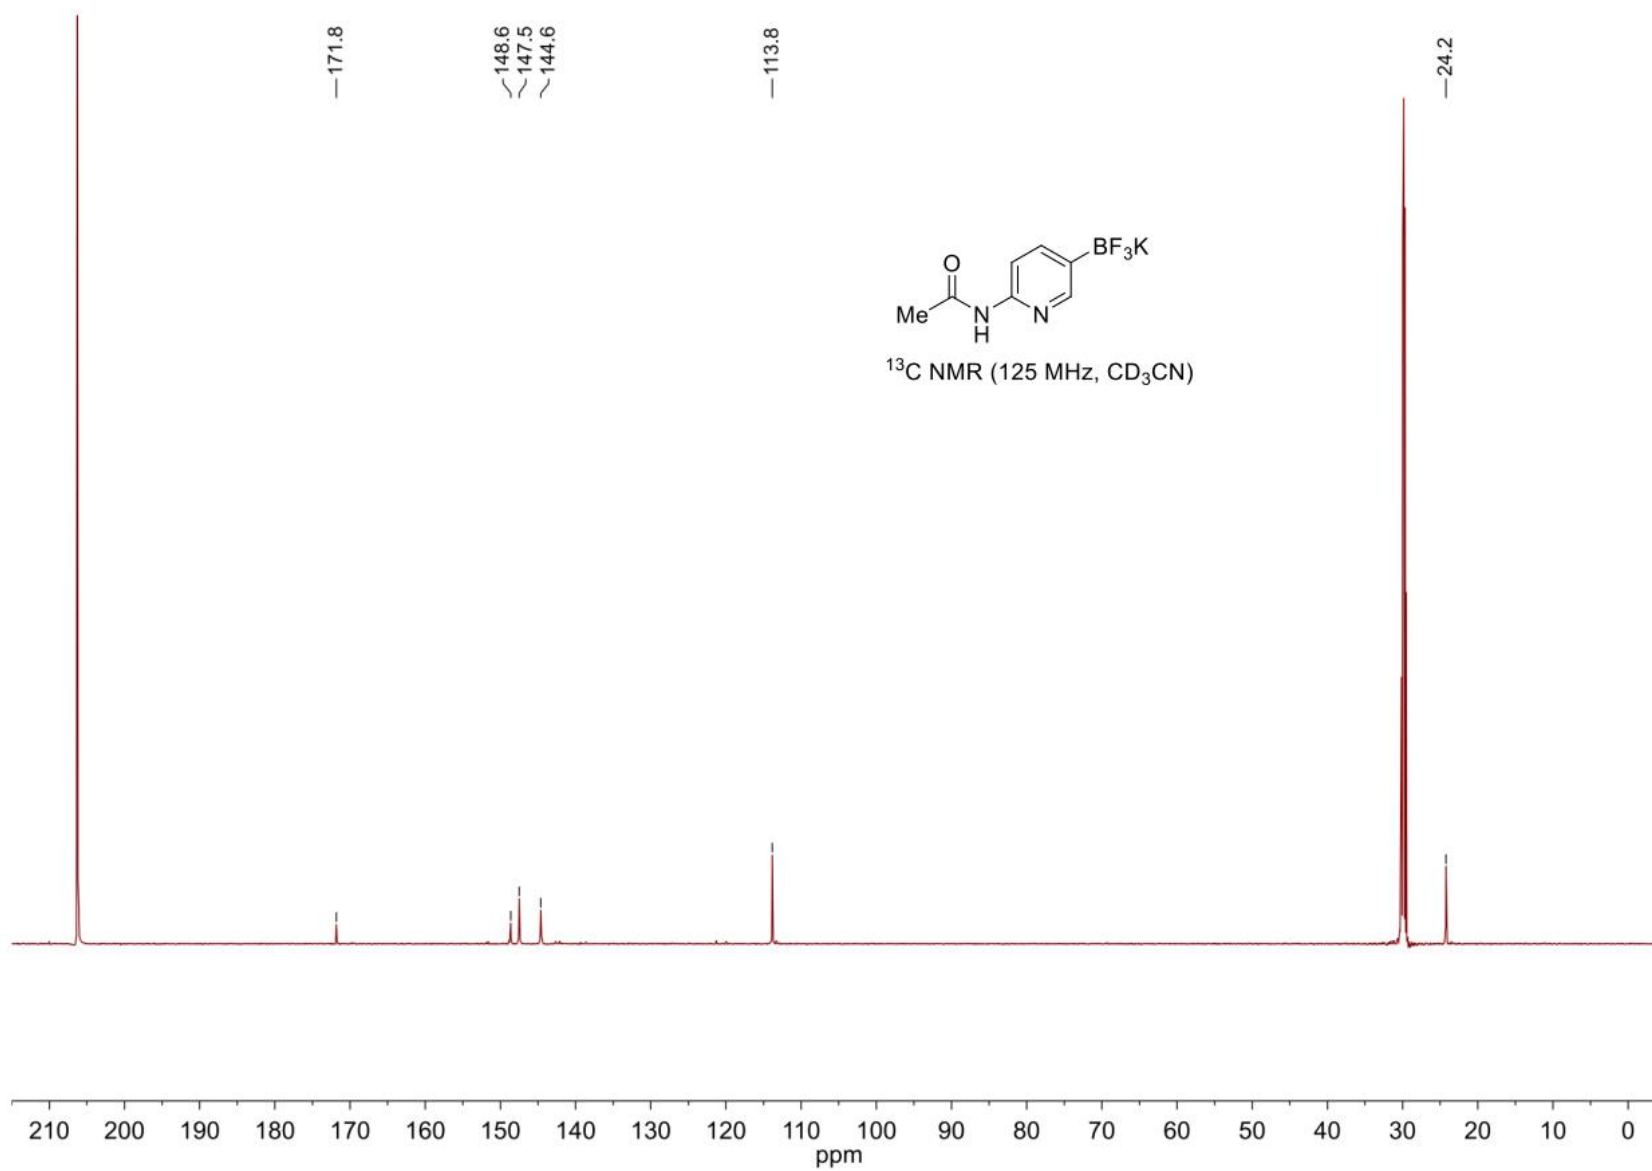

# 5-(Trifluoro- $\lambda^4$ -boraneyl)quinoline, potassium salt (85)

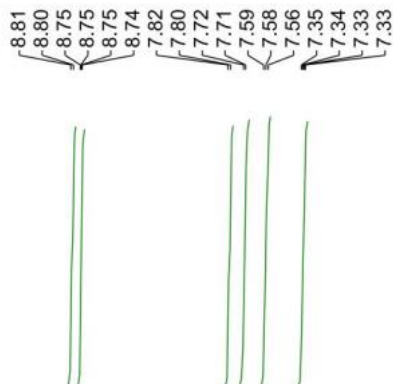

$^1\text{H}$  NMR (500 MHz,  $\text{CD}_3\text{CN}$ )

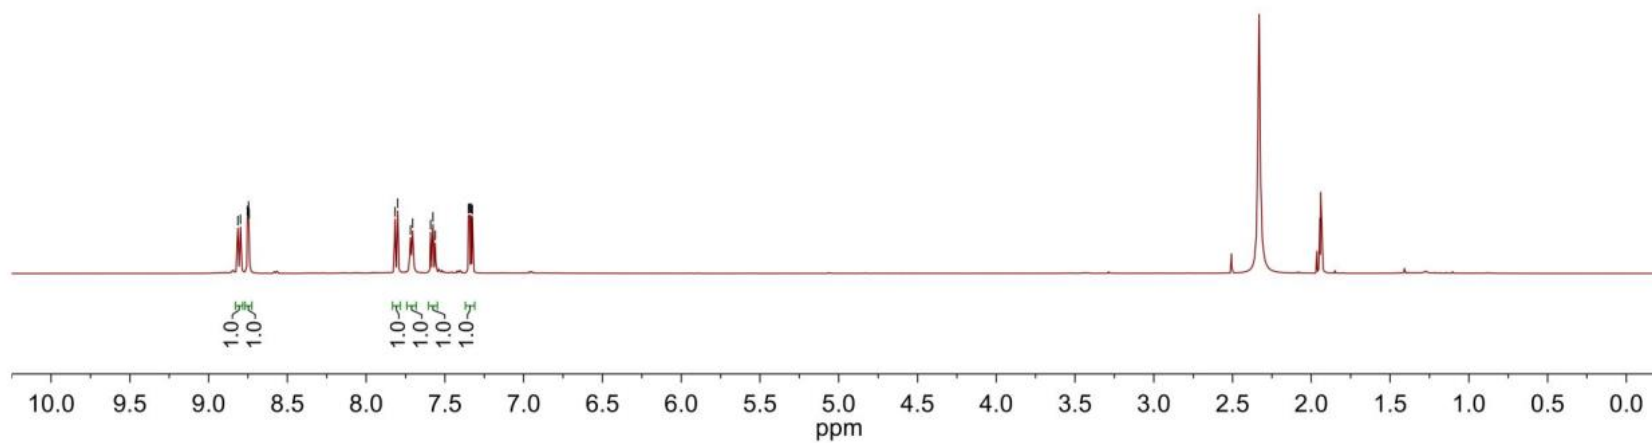

# 5-(Trifluoro- $\lambda^4$ -boraneyl)quinoline, potassium salt (85)

—149.7  
—139.0  
130.0  
130.0  
129.5  
127.7  
—120.4

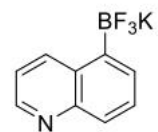

$^{13}\text{C}$  NMR (125 MHz,  $\text{CD}_3\text{CN}$ )

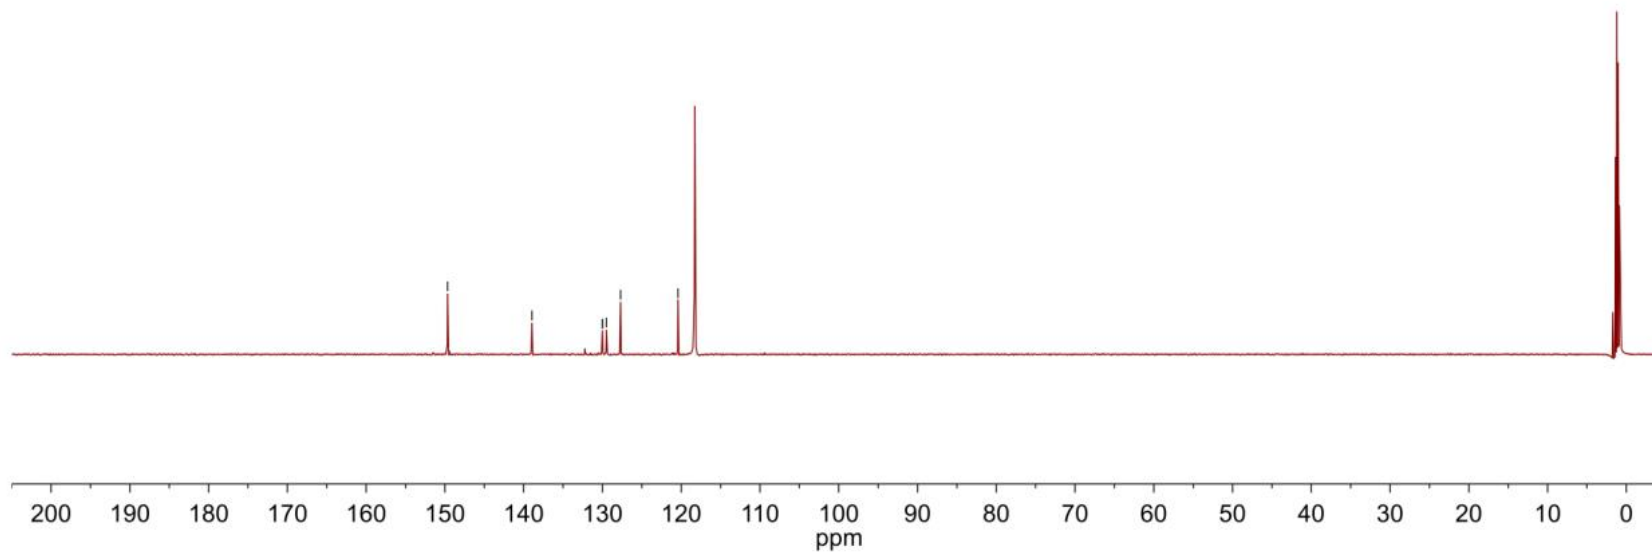

3-(Trifluoro- $\lambda^4$ -boraneyl)quinoline, potassium salt (86)

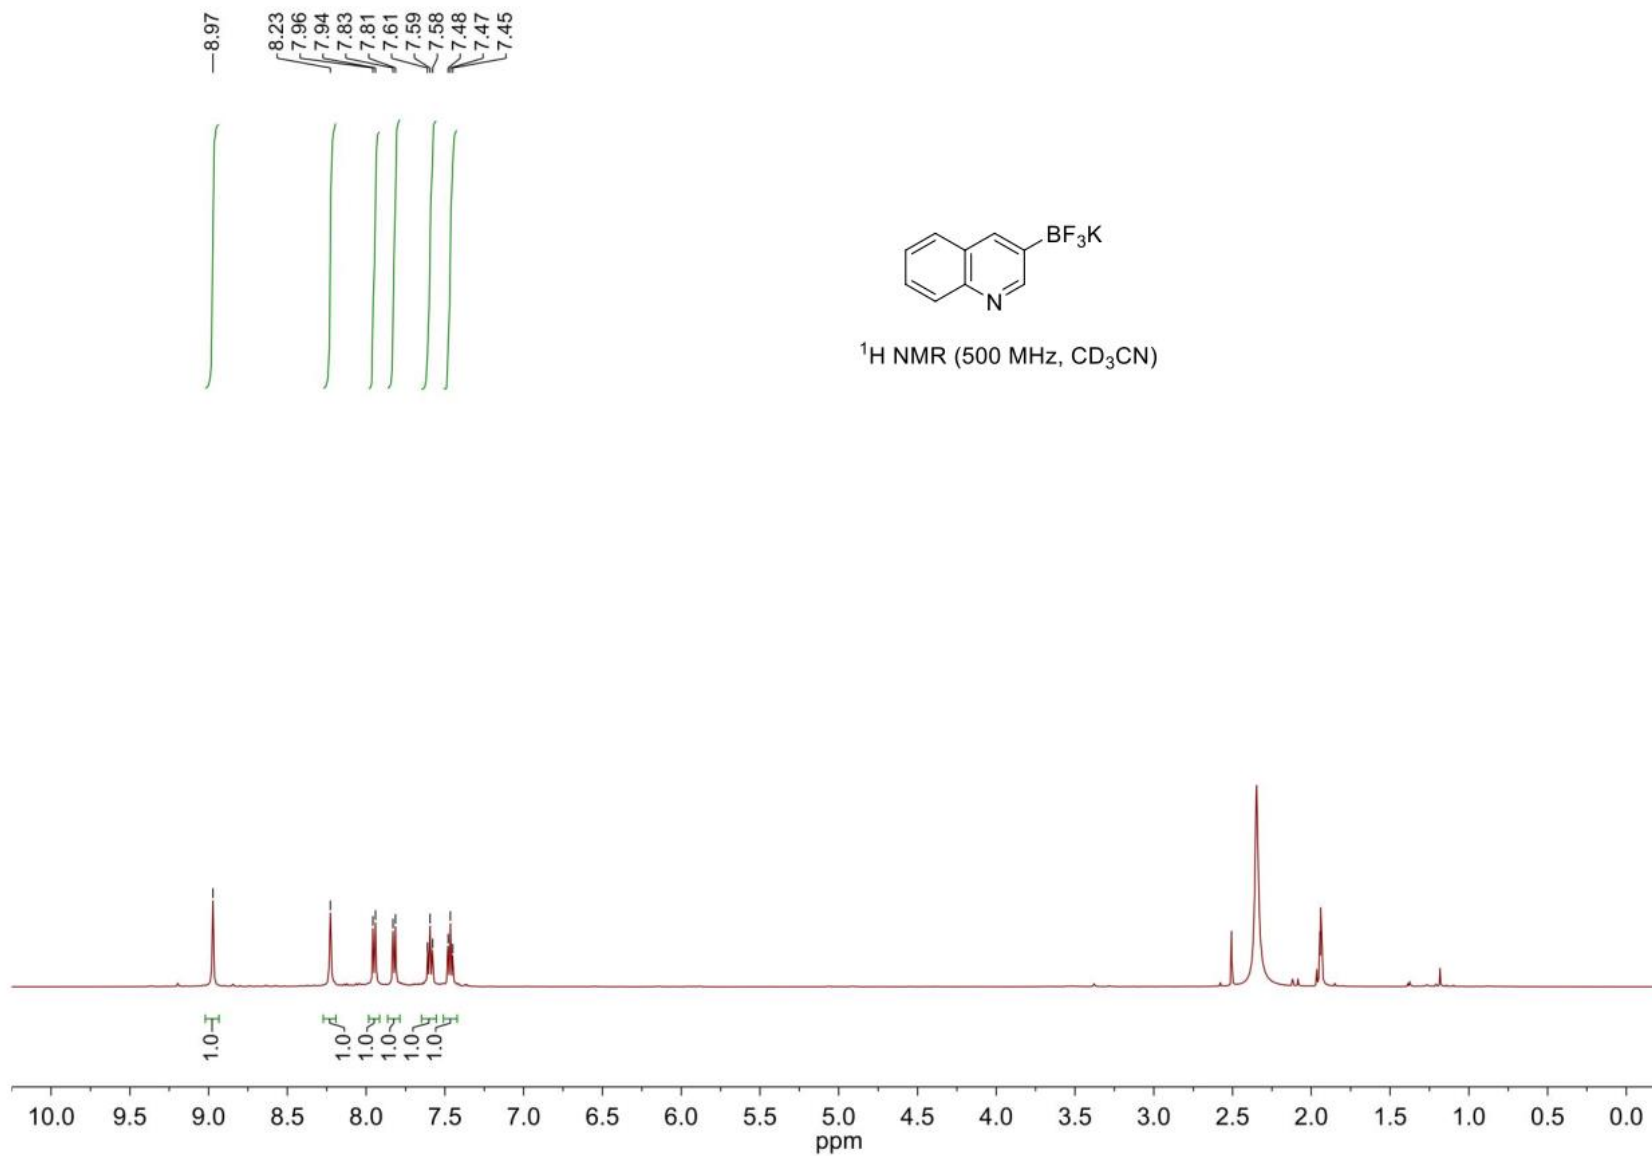

### 3-(Trifluoro- $\lambda^4$ -boraneyl)quinoline, potassium salt (86)

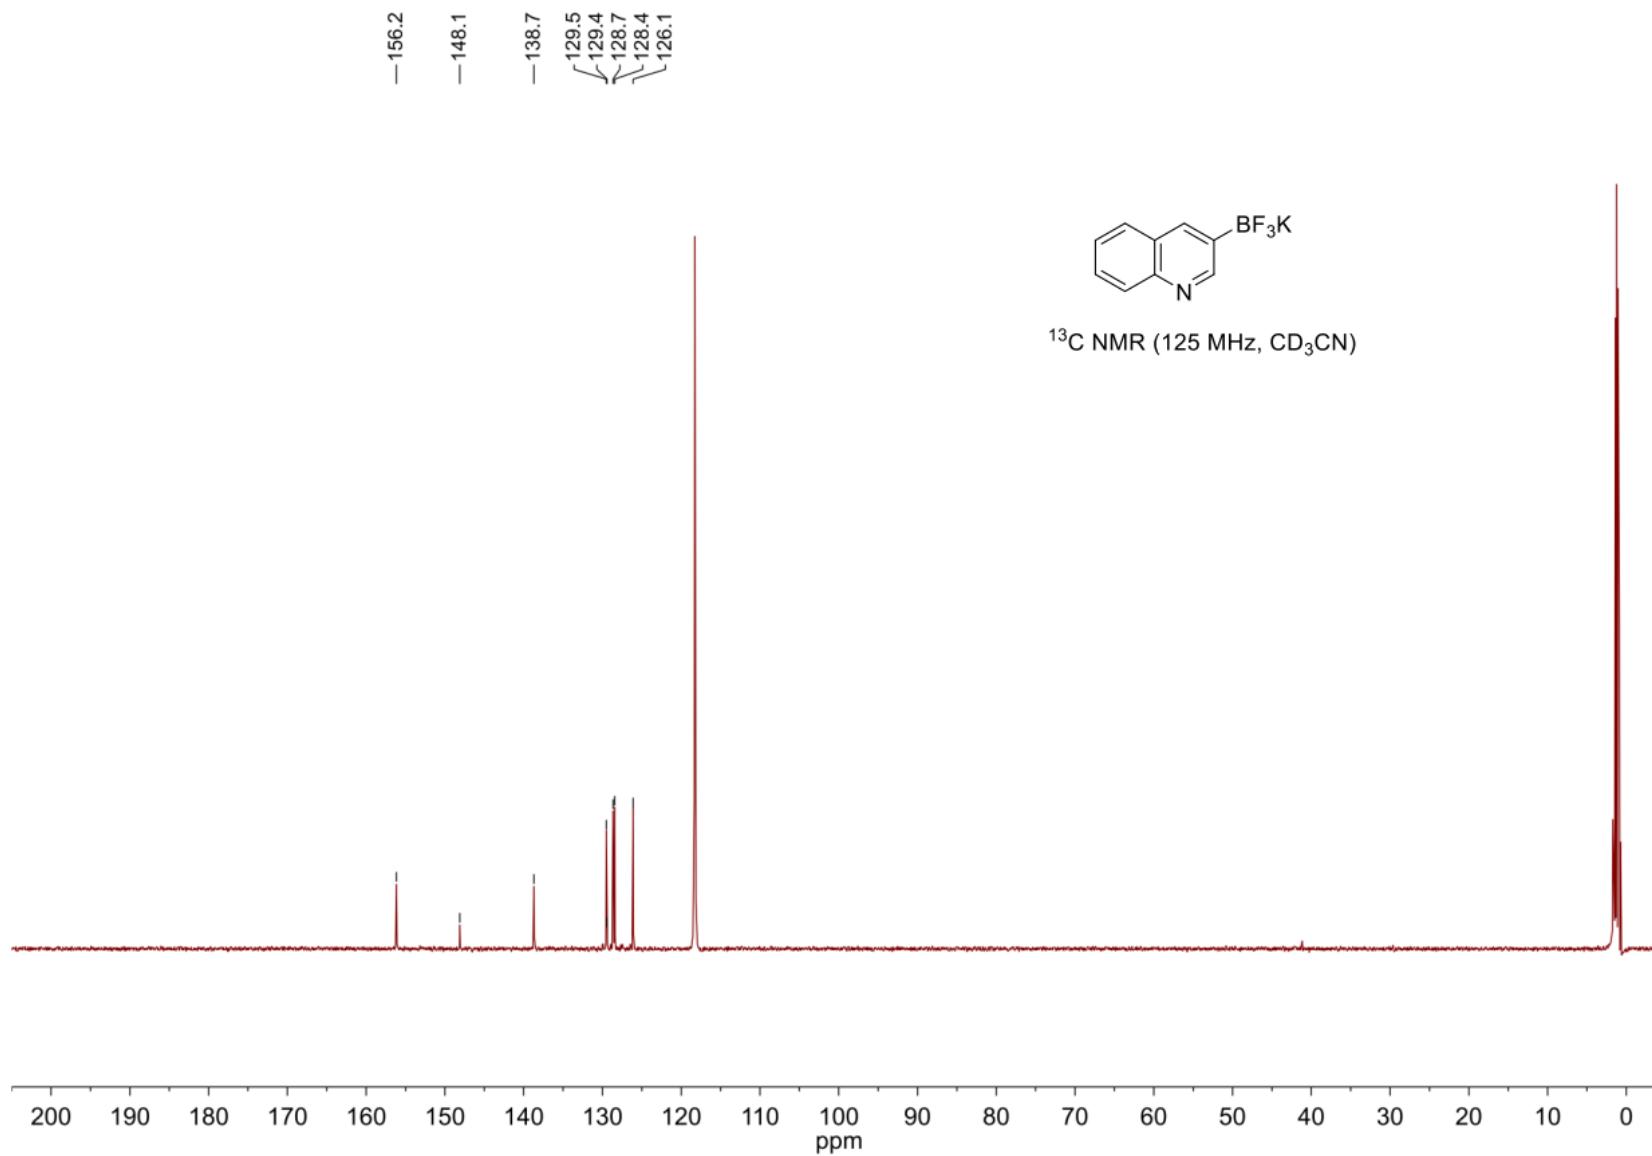

6-(Trifluoro- $\lambda^4$ -boraneyl)quinoline, potassium salt (87)

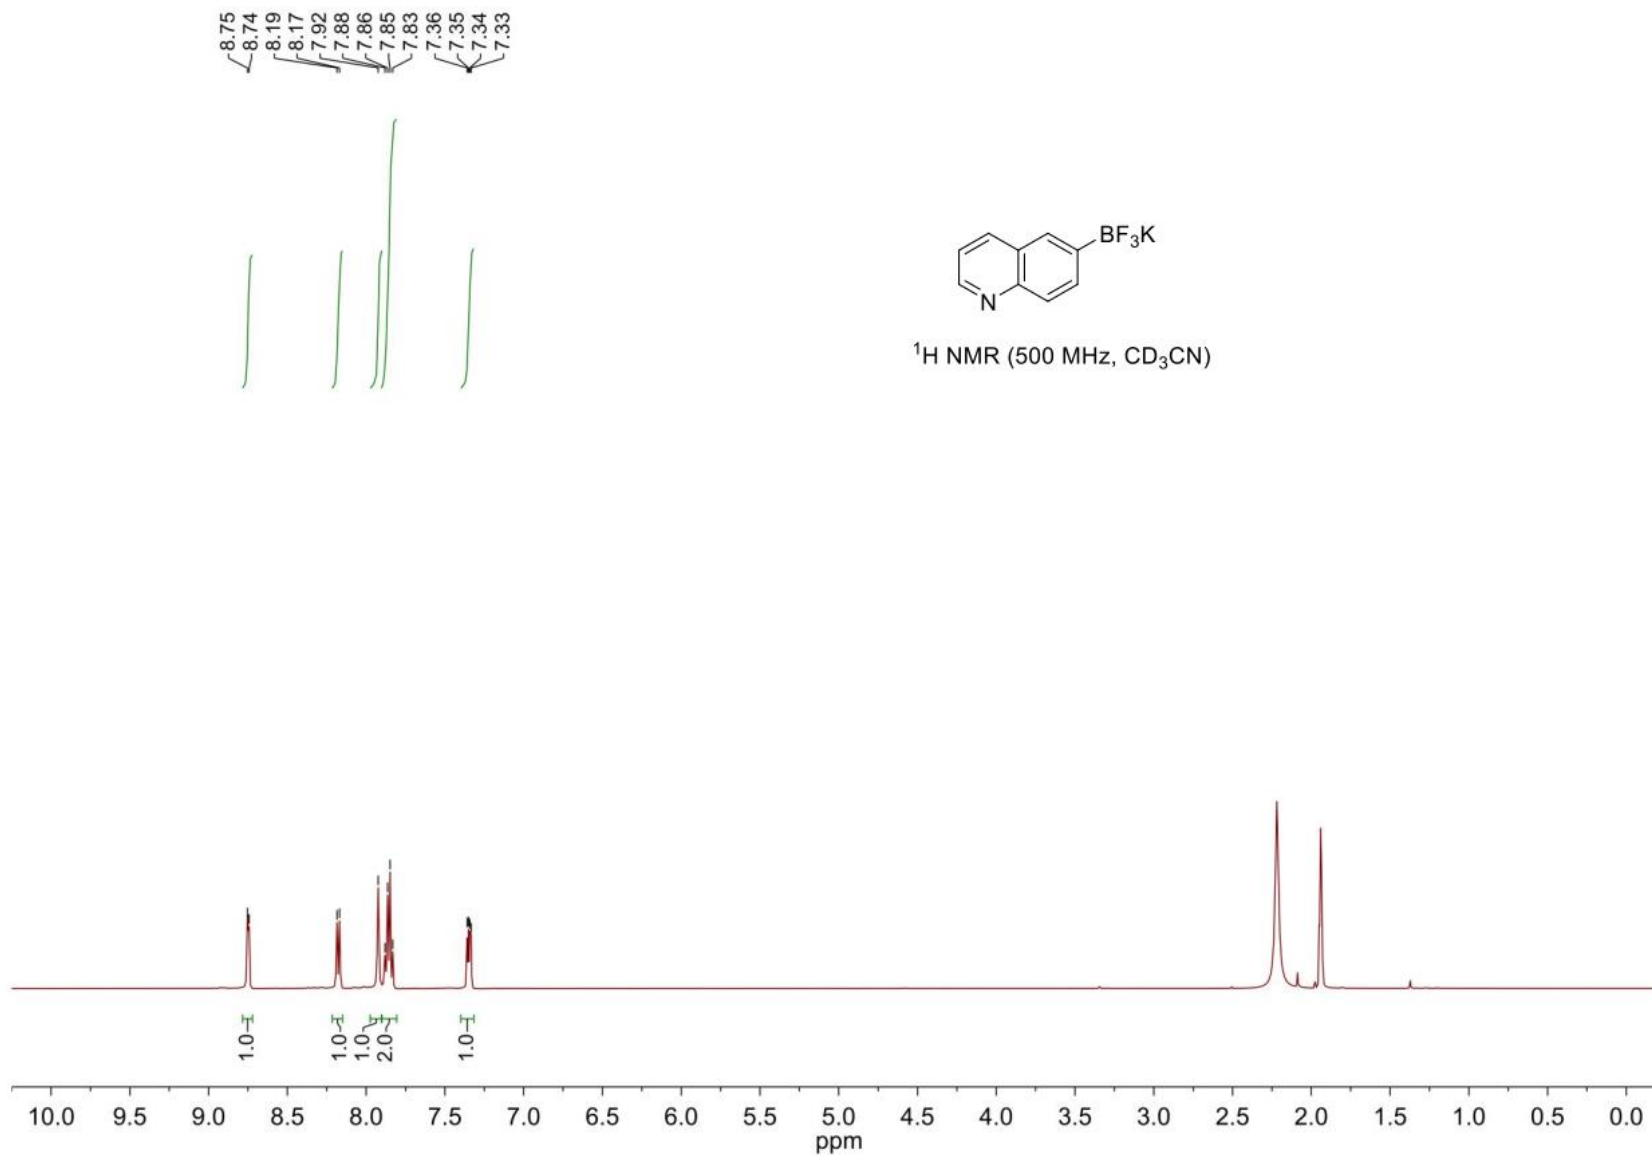

6-(Trifluoro- $\lambda^4$ -boraneyl)quinoline, potassium salt (87)

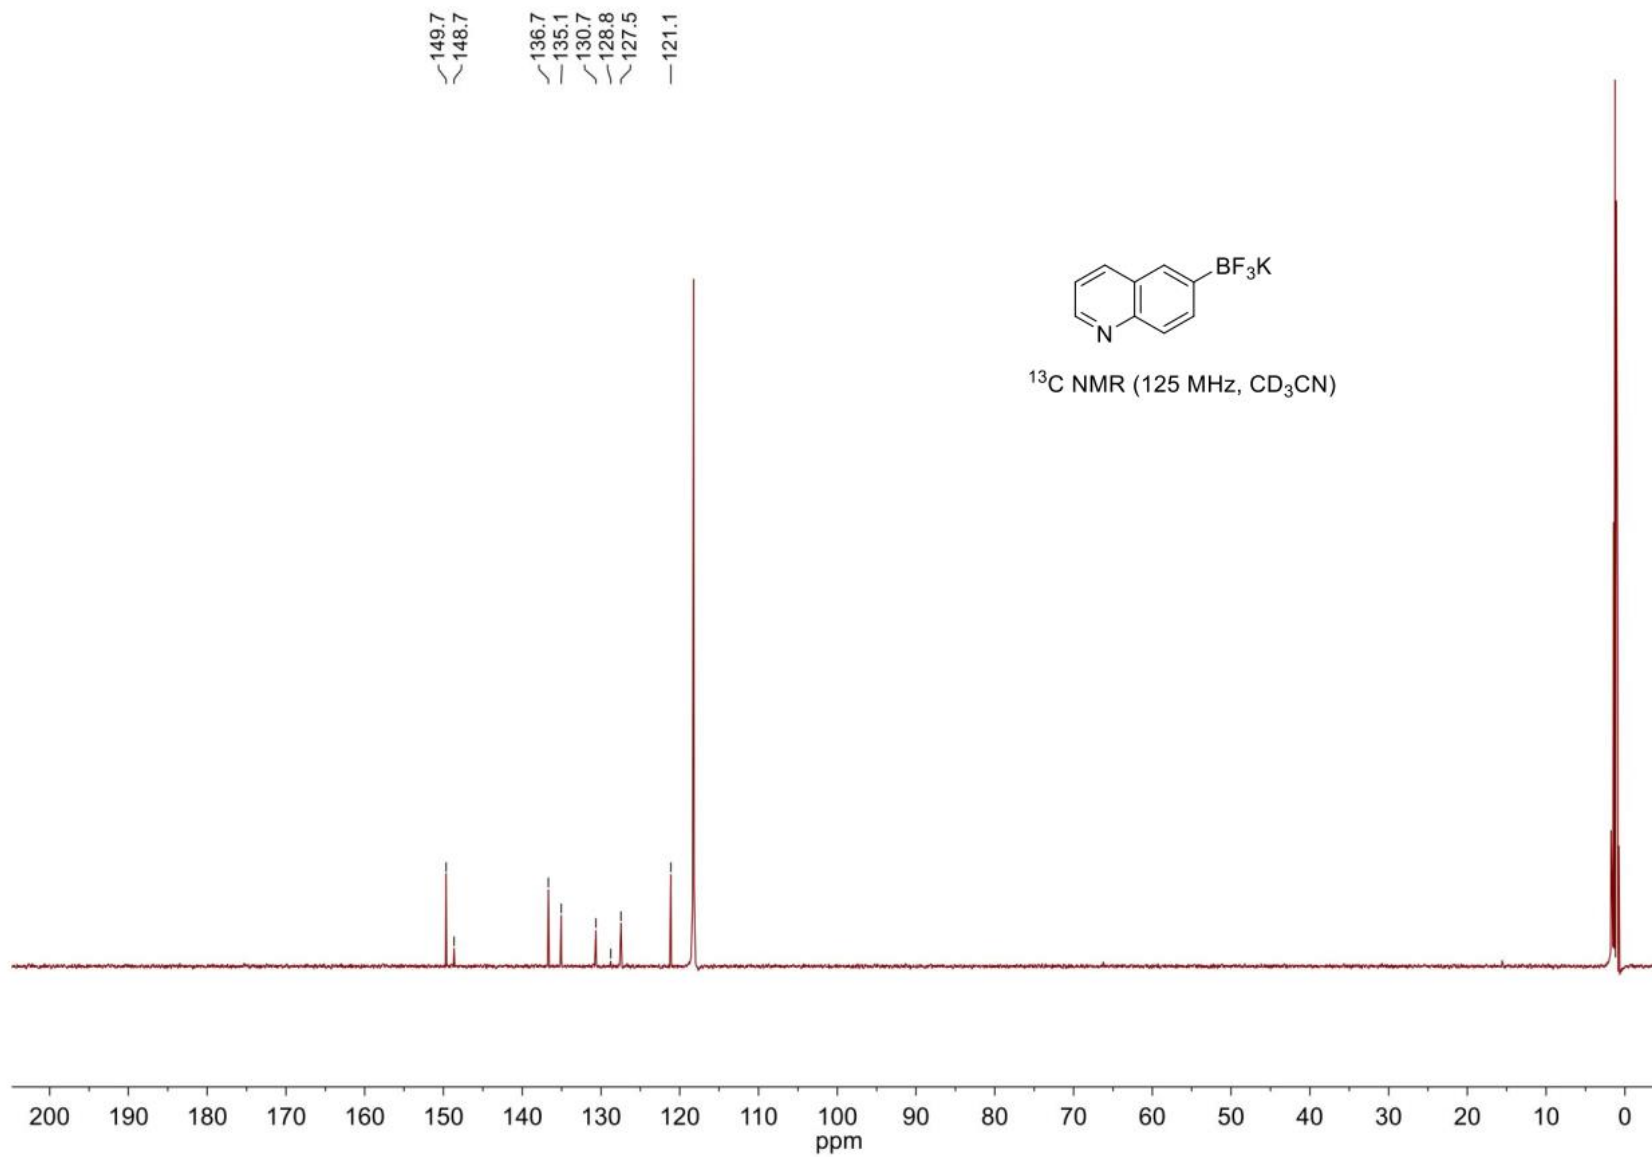



5-(Trifluoro- $\lambda^4$ -boraneyl)-1*H*-indole, potassium salt (88)

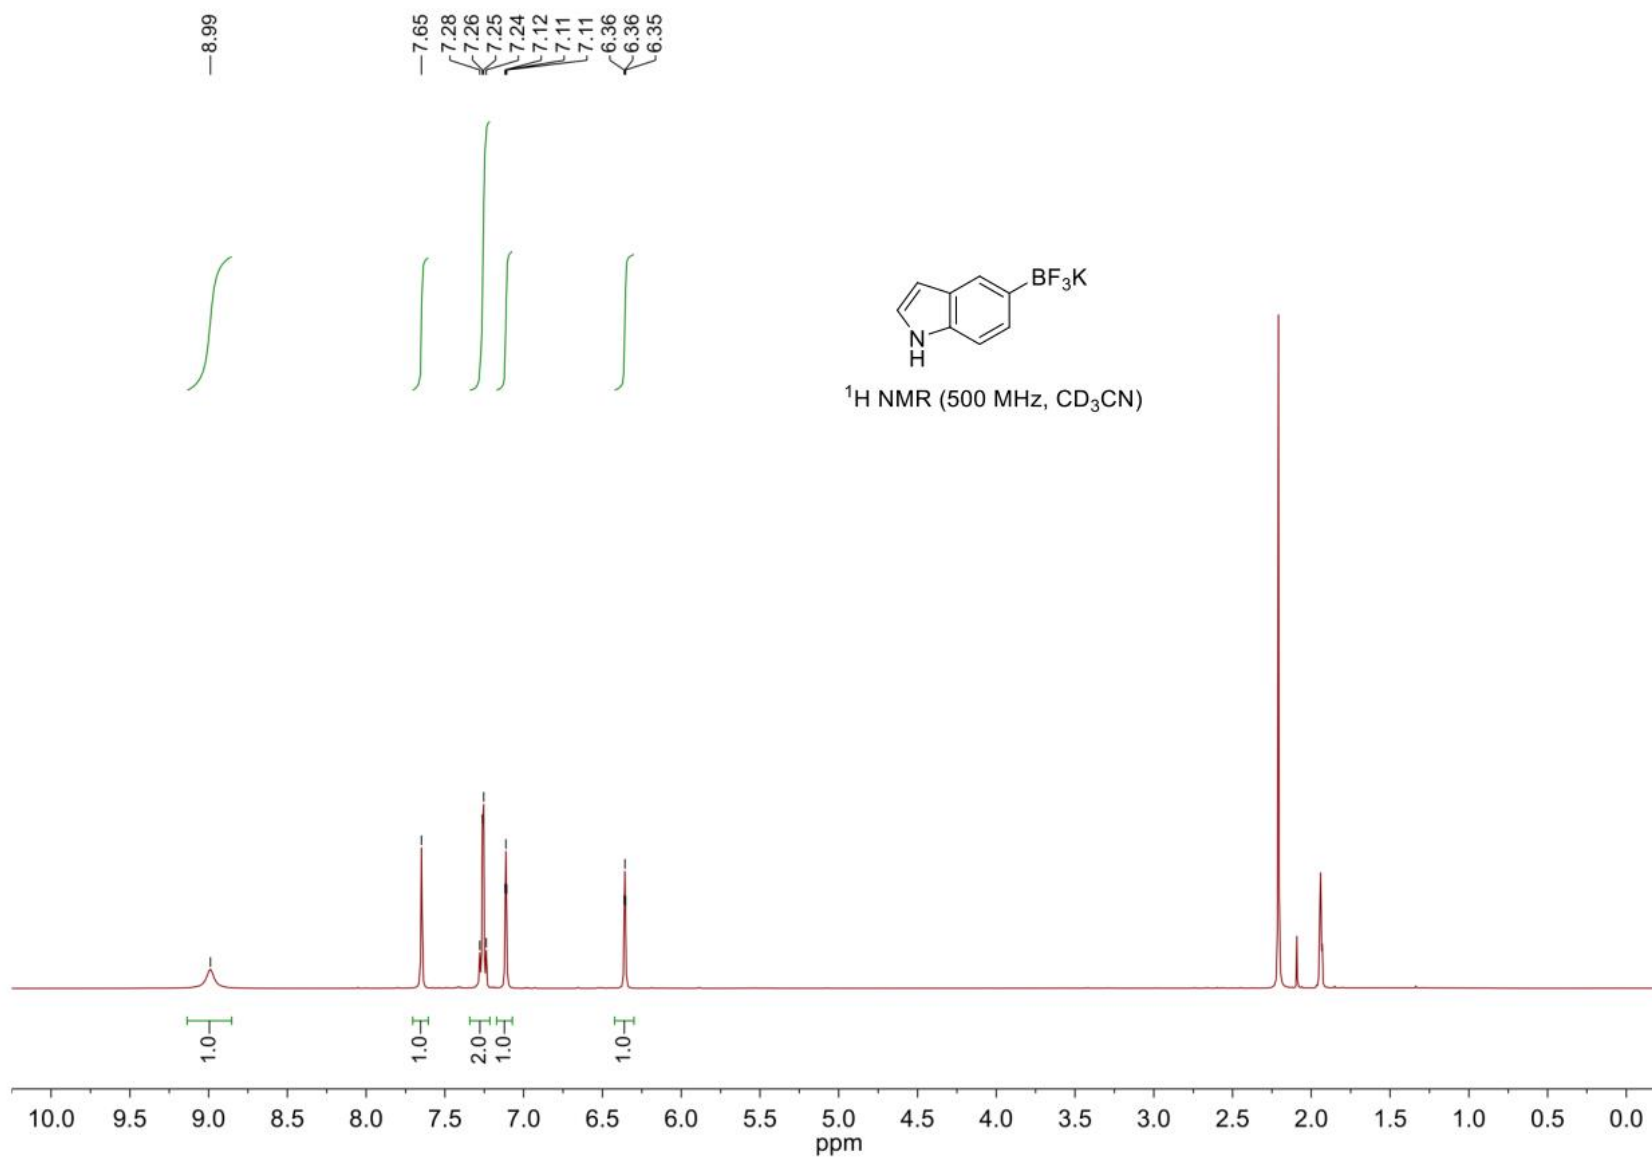

5-(Trifluoro- $\lambda^4$ -boraneyl)-1*H*-indole, potassium salt (88)

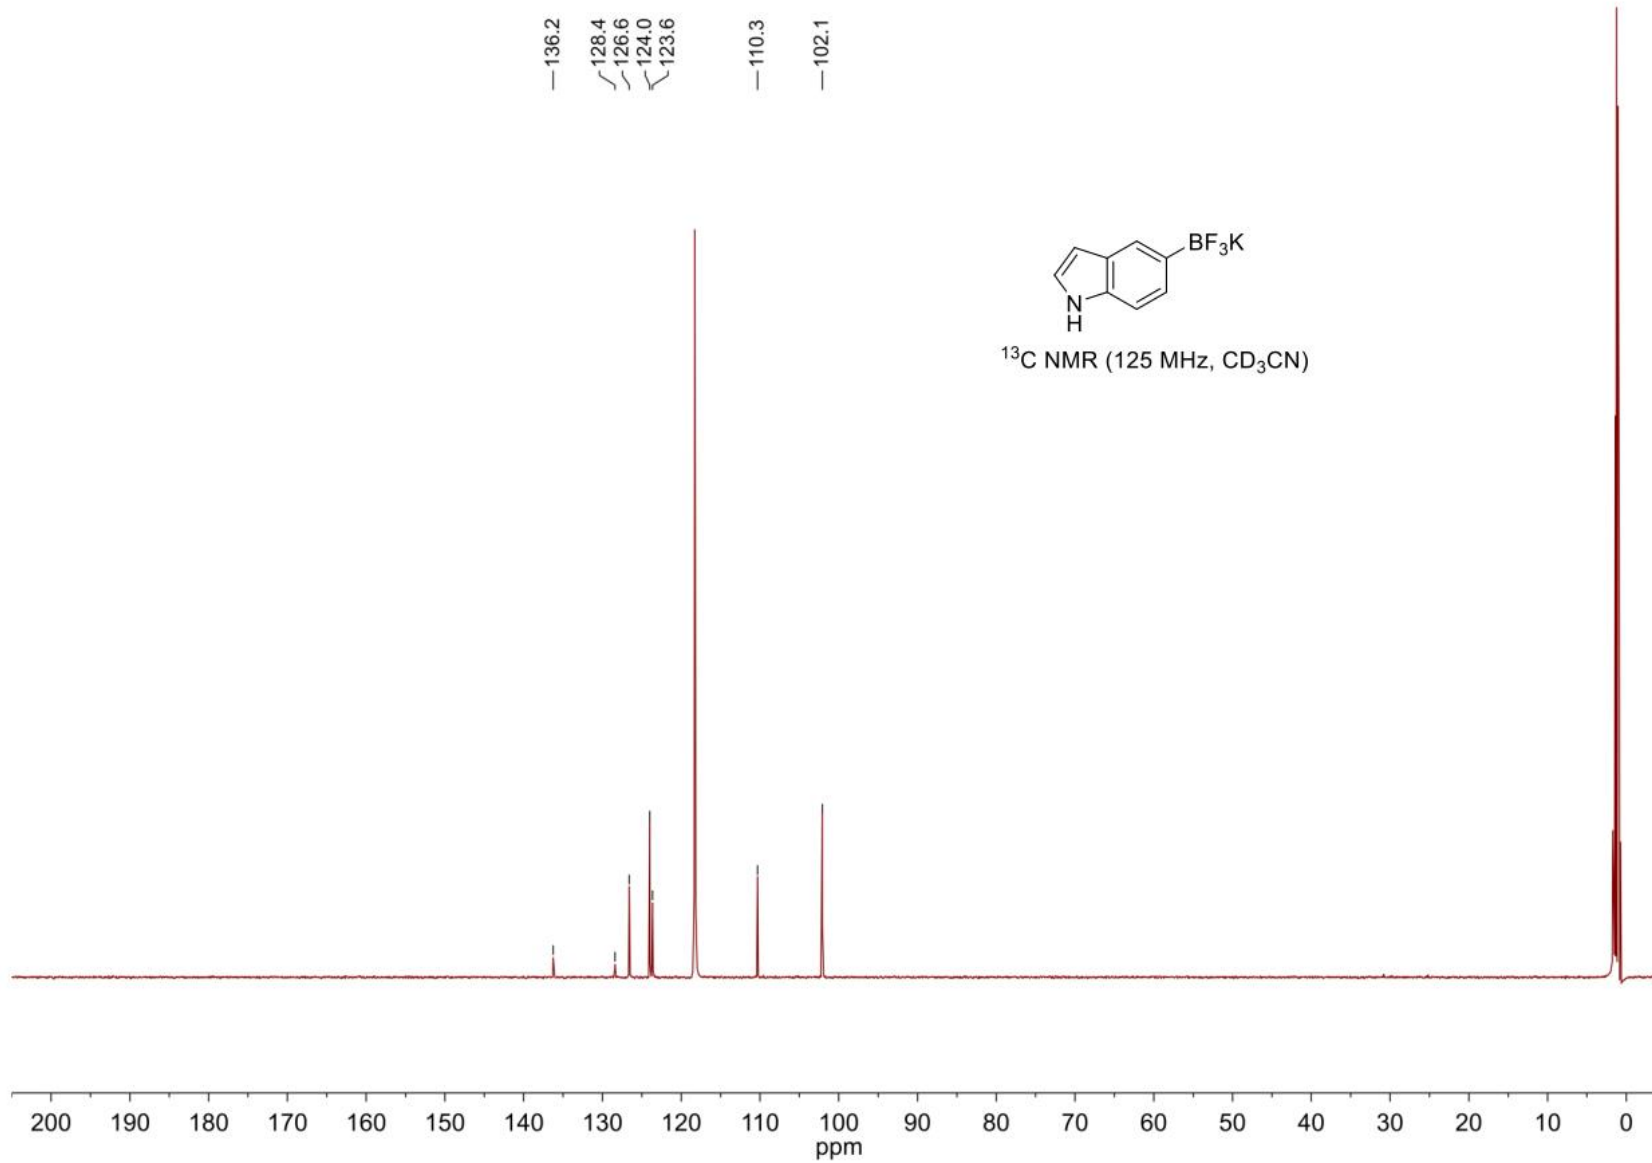

6-(4,4,5,5-Tetramethyl-1,3,2-dioxaborolan-2-yl)-1H-indole (89)

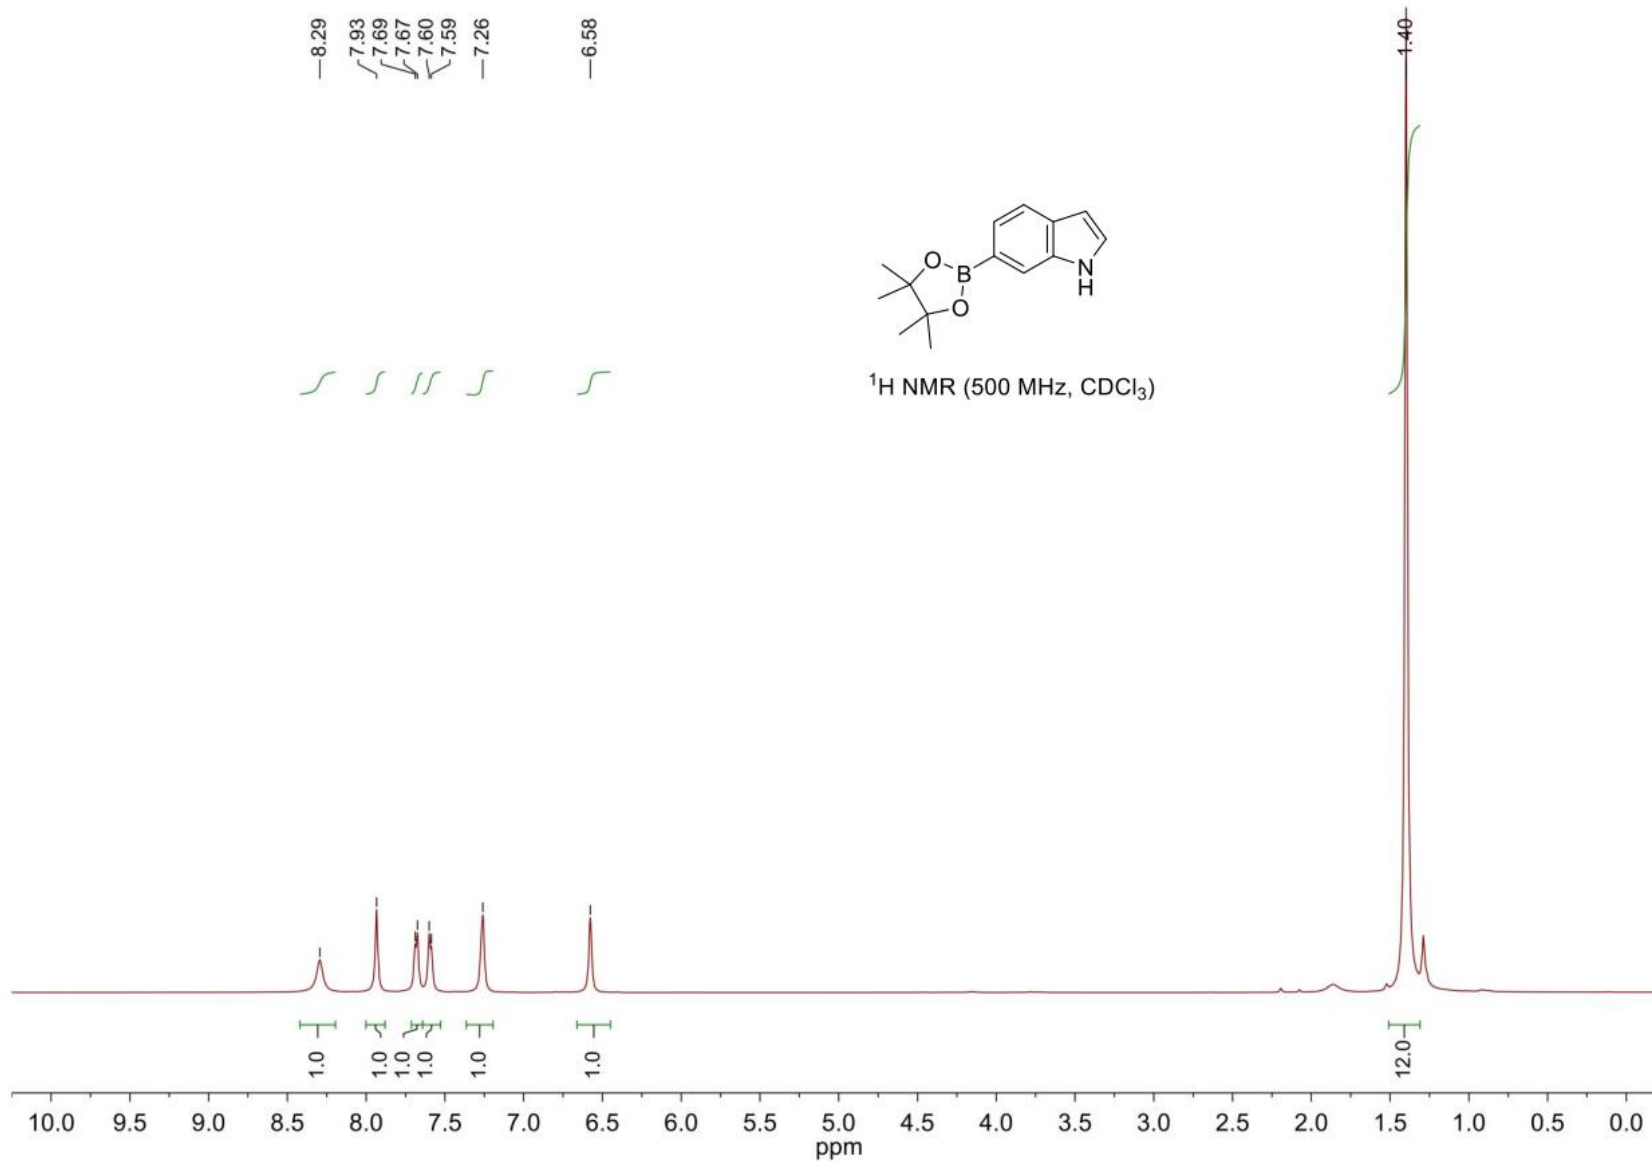

6-(4,4,5,5-Tetramethyl-1,3,2-dioxaborolan-2-yl)-1H-indole (89)

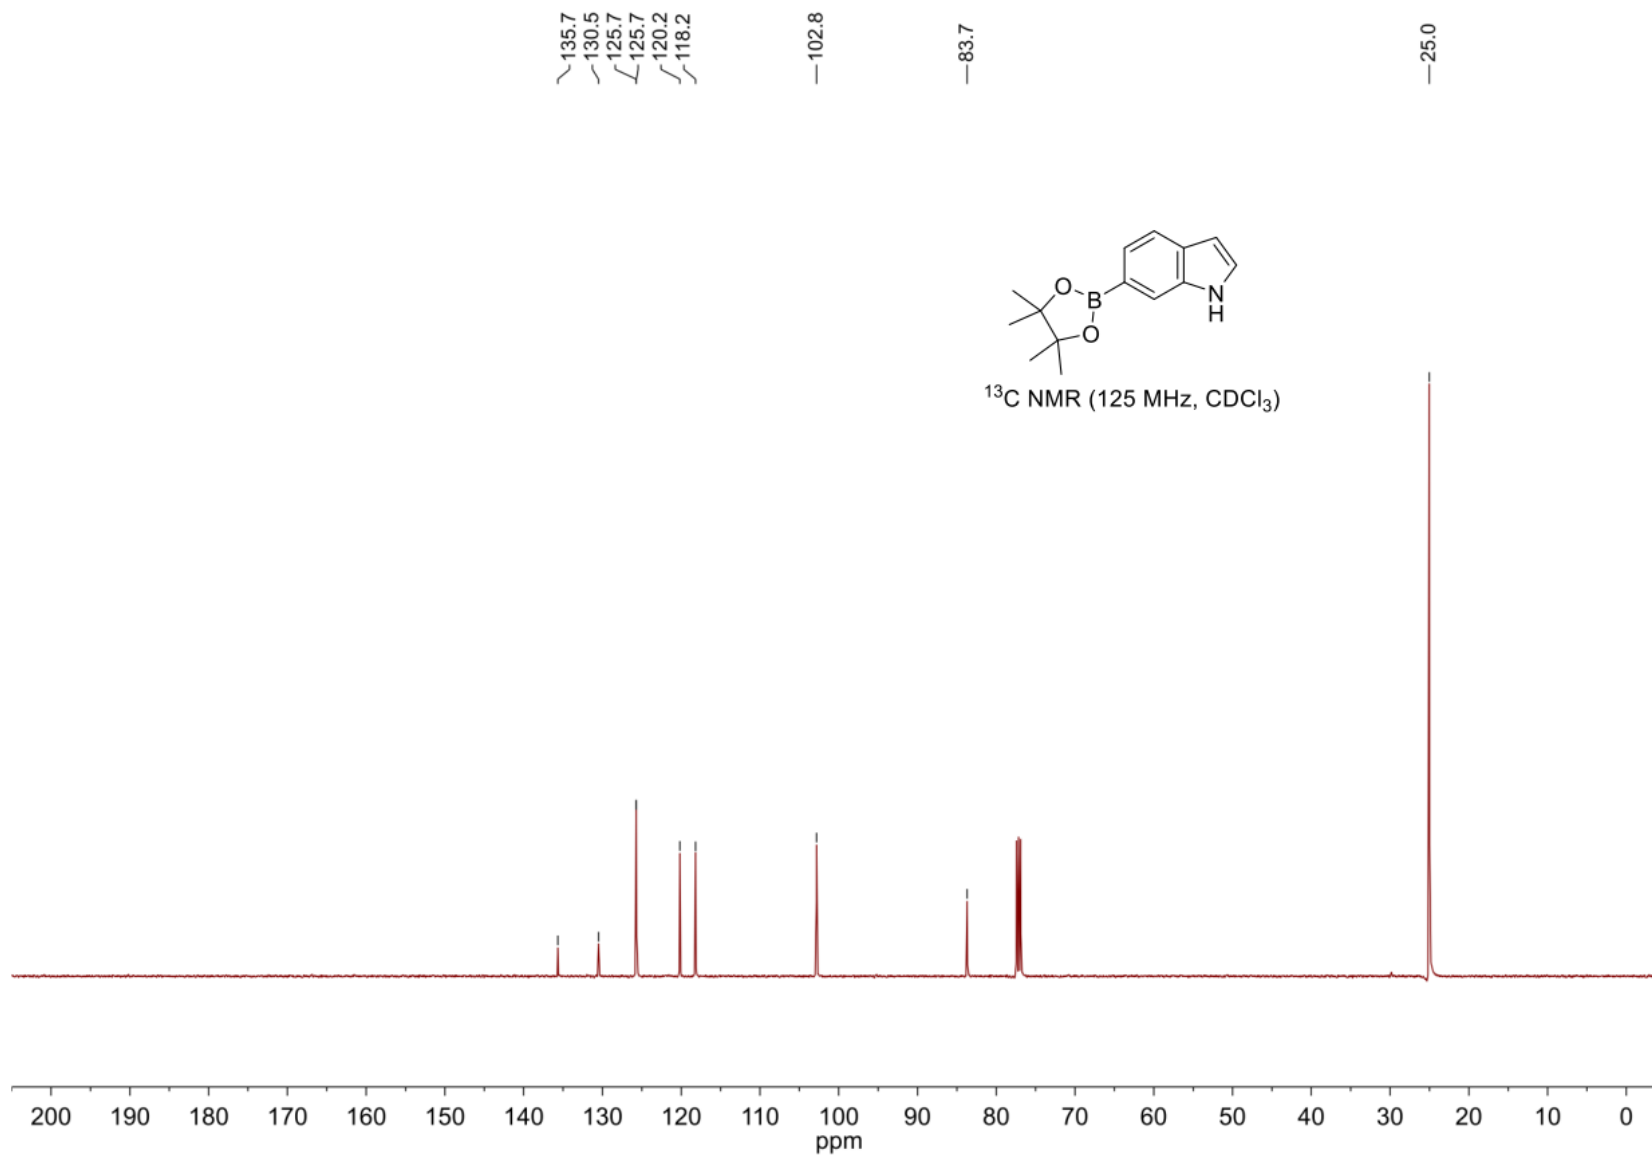

S452

3-(Trifluoro- $\lambda^4$ -boraneyl)-9H-carbazole, potassium salt (90)

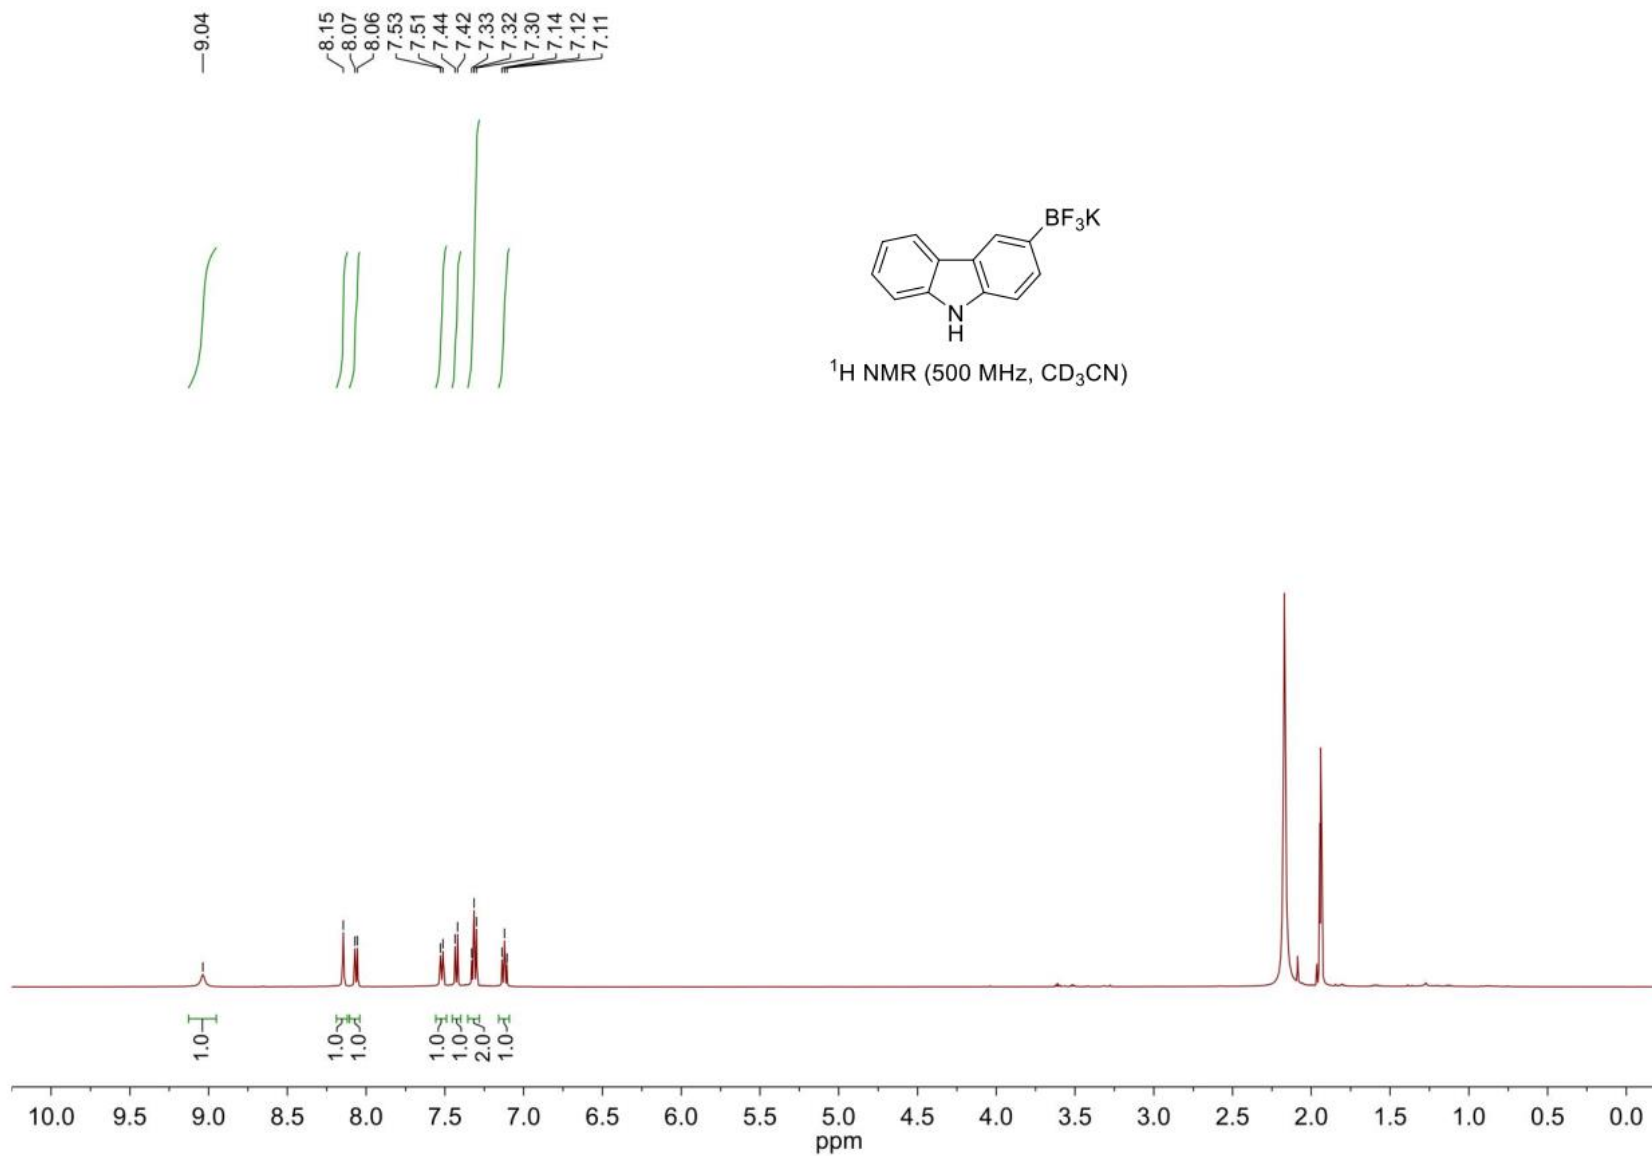

3-(Trifluoro- $\lambda^4$ -boraneyl)-9H-carbazole, potassium salt (90)

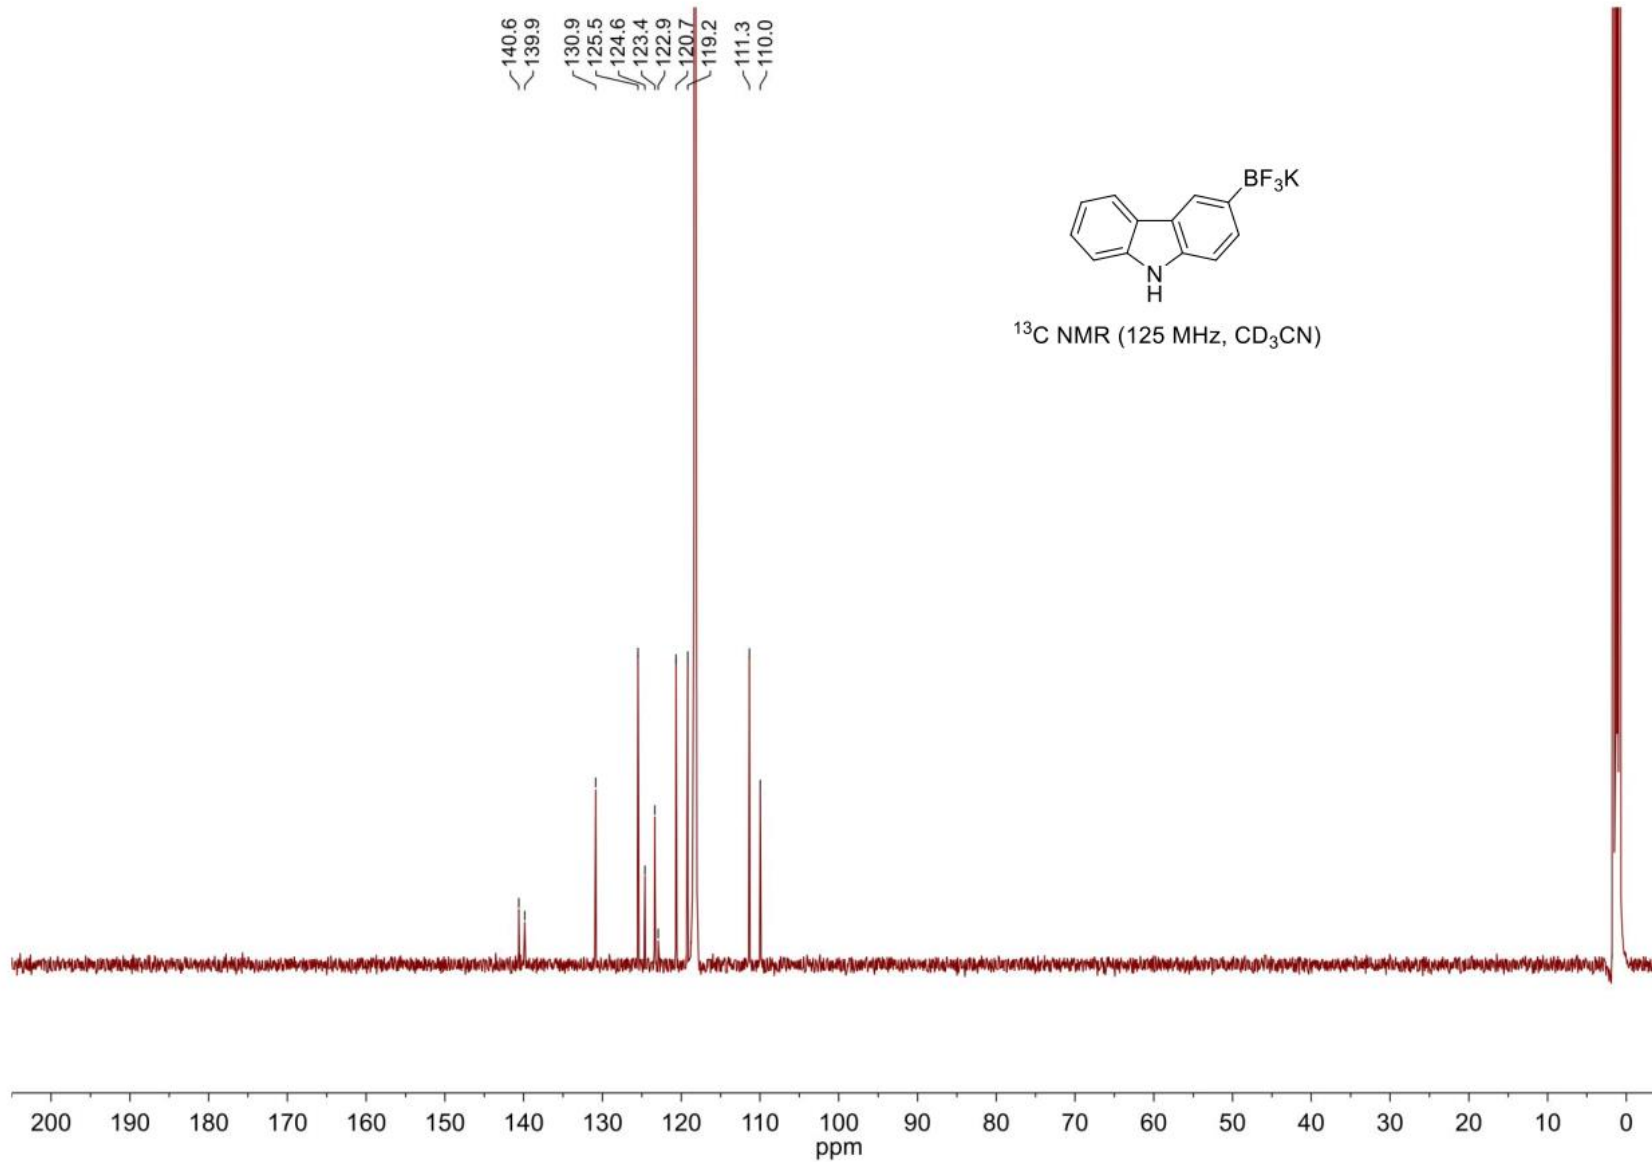

2-(Trifluoro- $\lambda^4$ -boraneyl)-9H-carbazole, potassium salt (91)

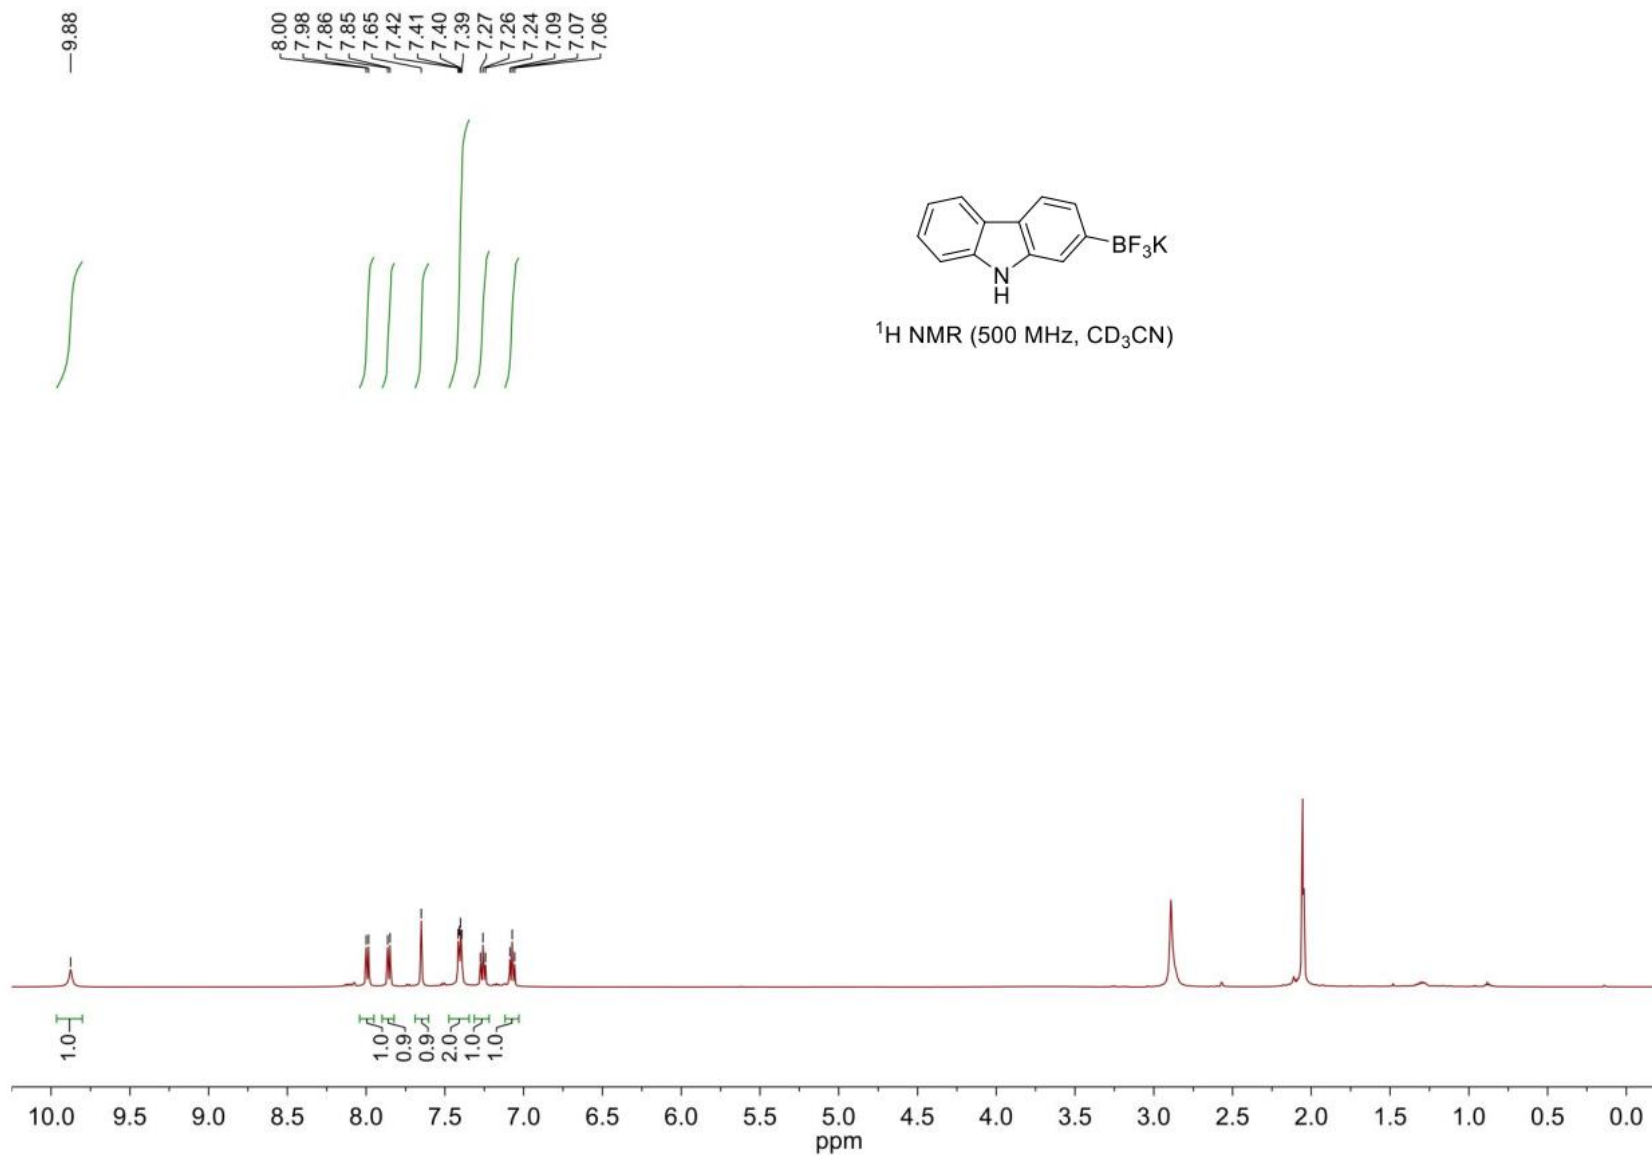

2-(Trifluoro- $\lambda^4$ -boraneyl)-9H-carbazole, potassium salt (91)

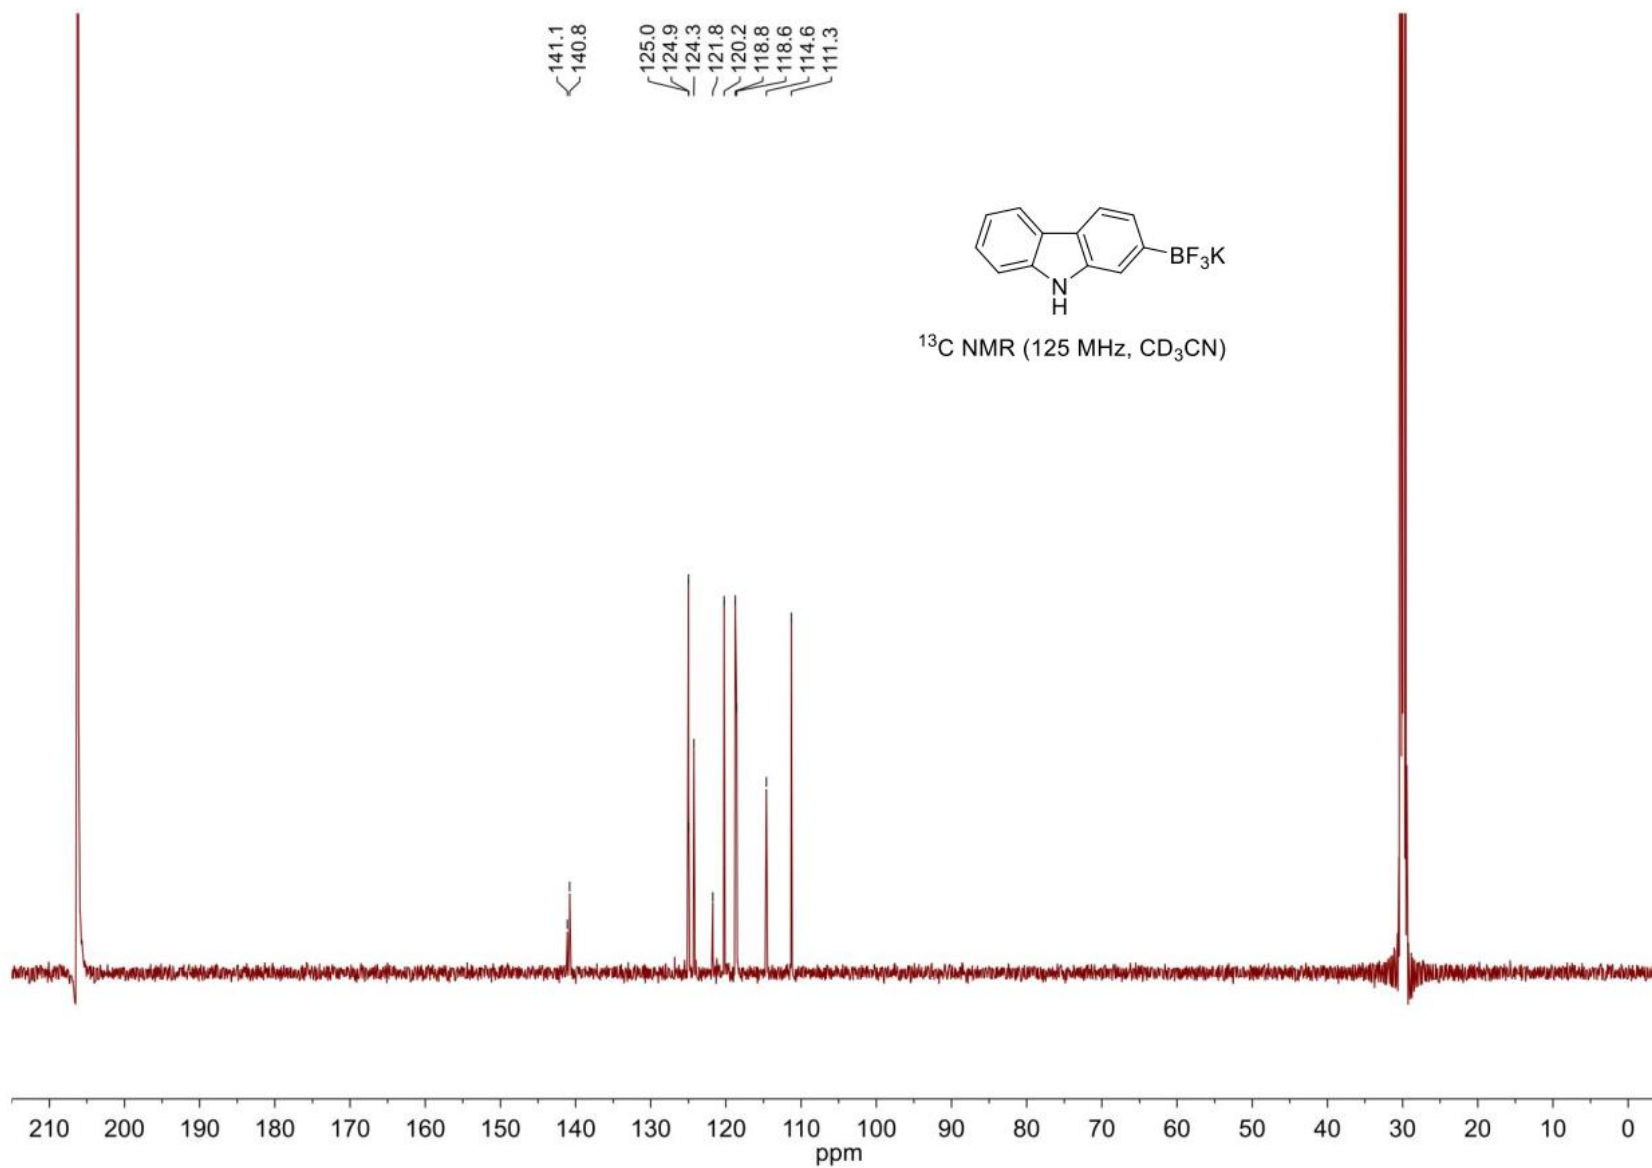

S456



5-(4,4,5,5-Tetramethyl-1,3,2-dioxaborolan-2-yl)pyrimidin-2-amine (92)

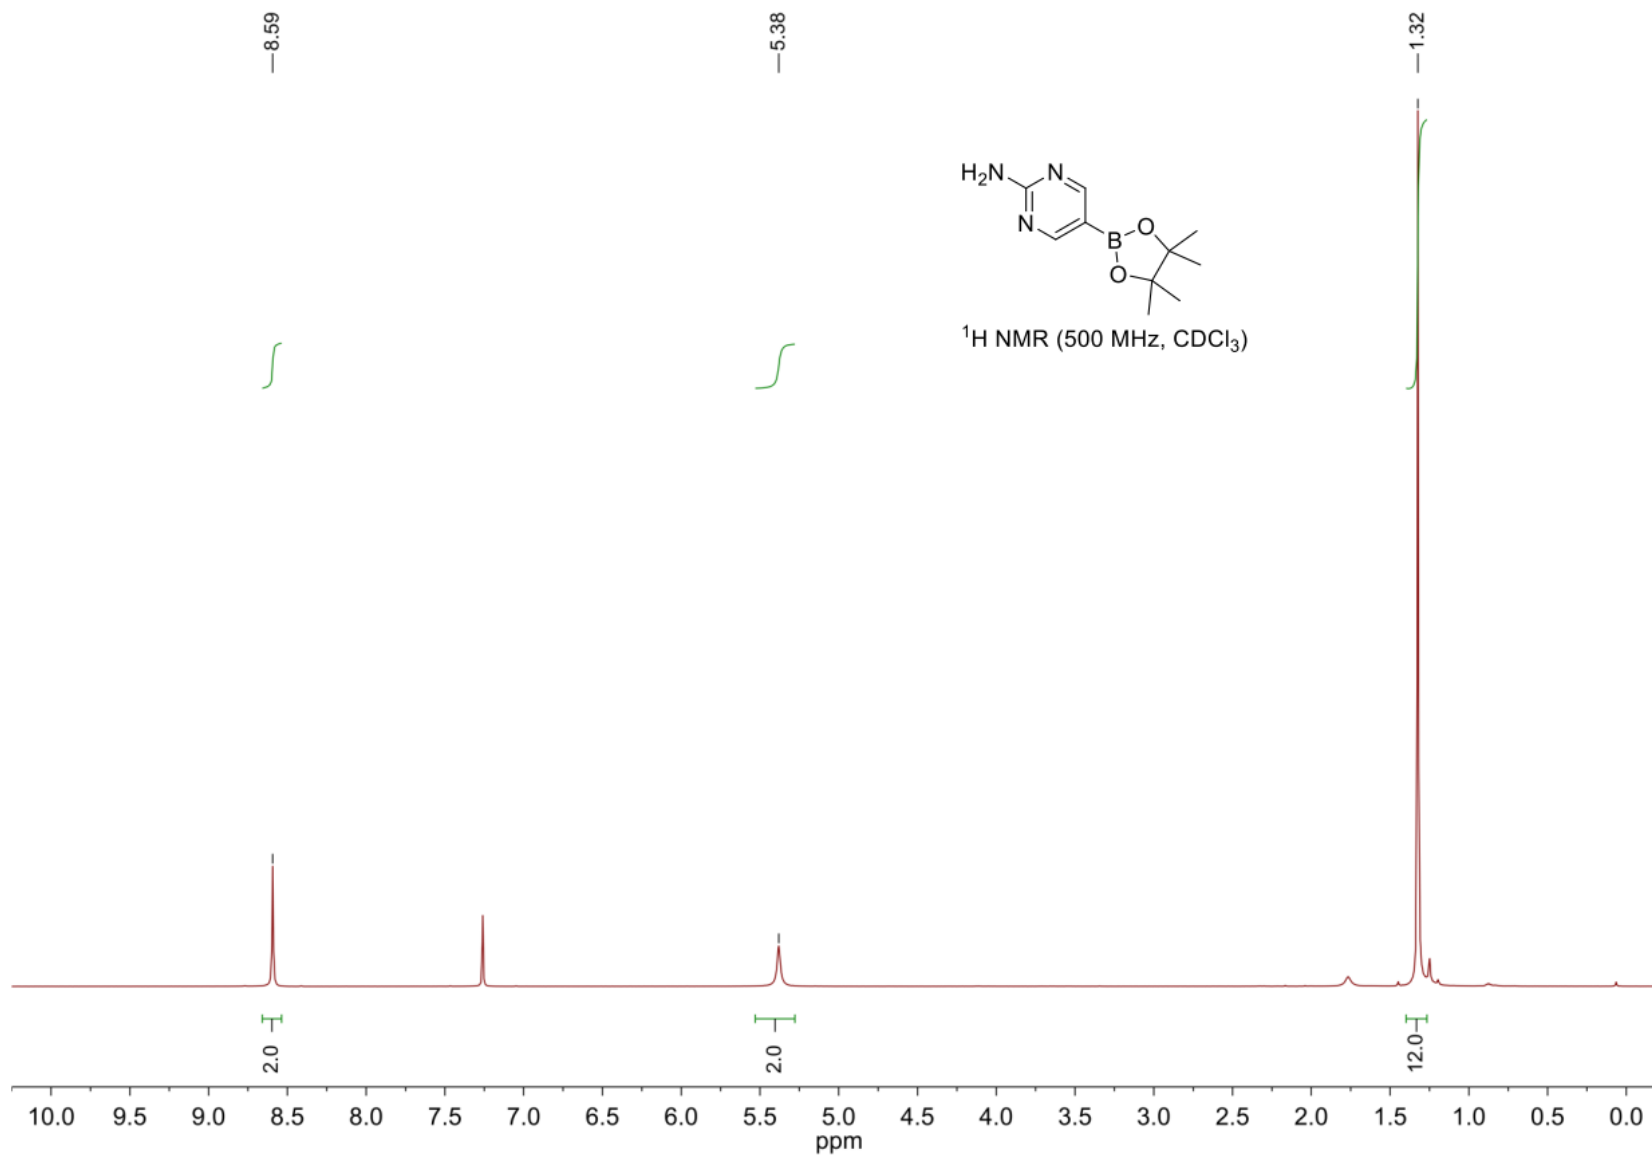

S457

5-(4,4,5,5-Tetramethyl-1,3,2-dioxaborolan-2-yl)pyrimidin-2-amine (92)

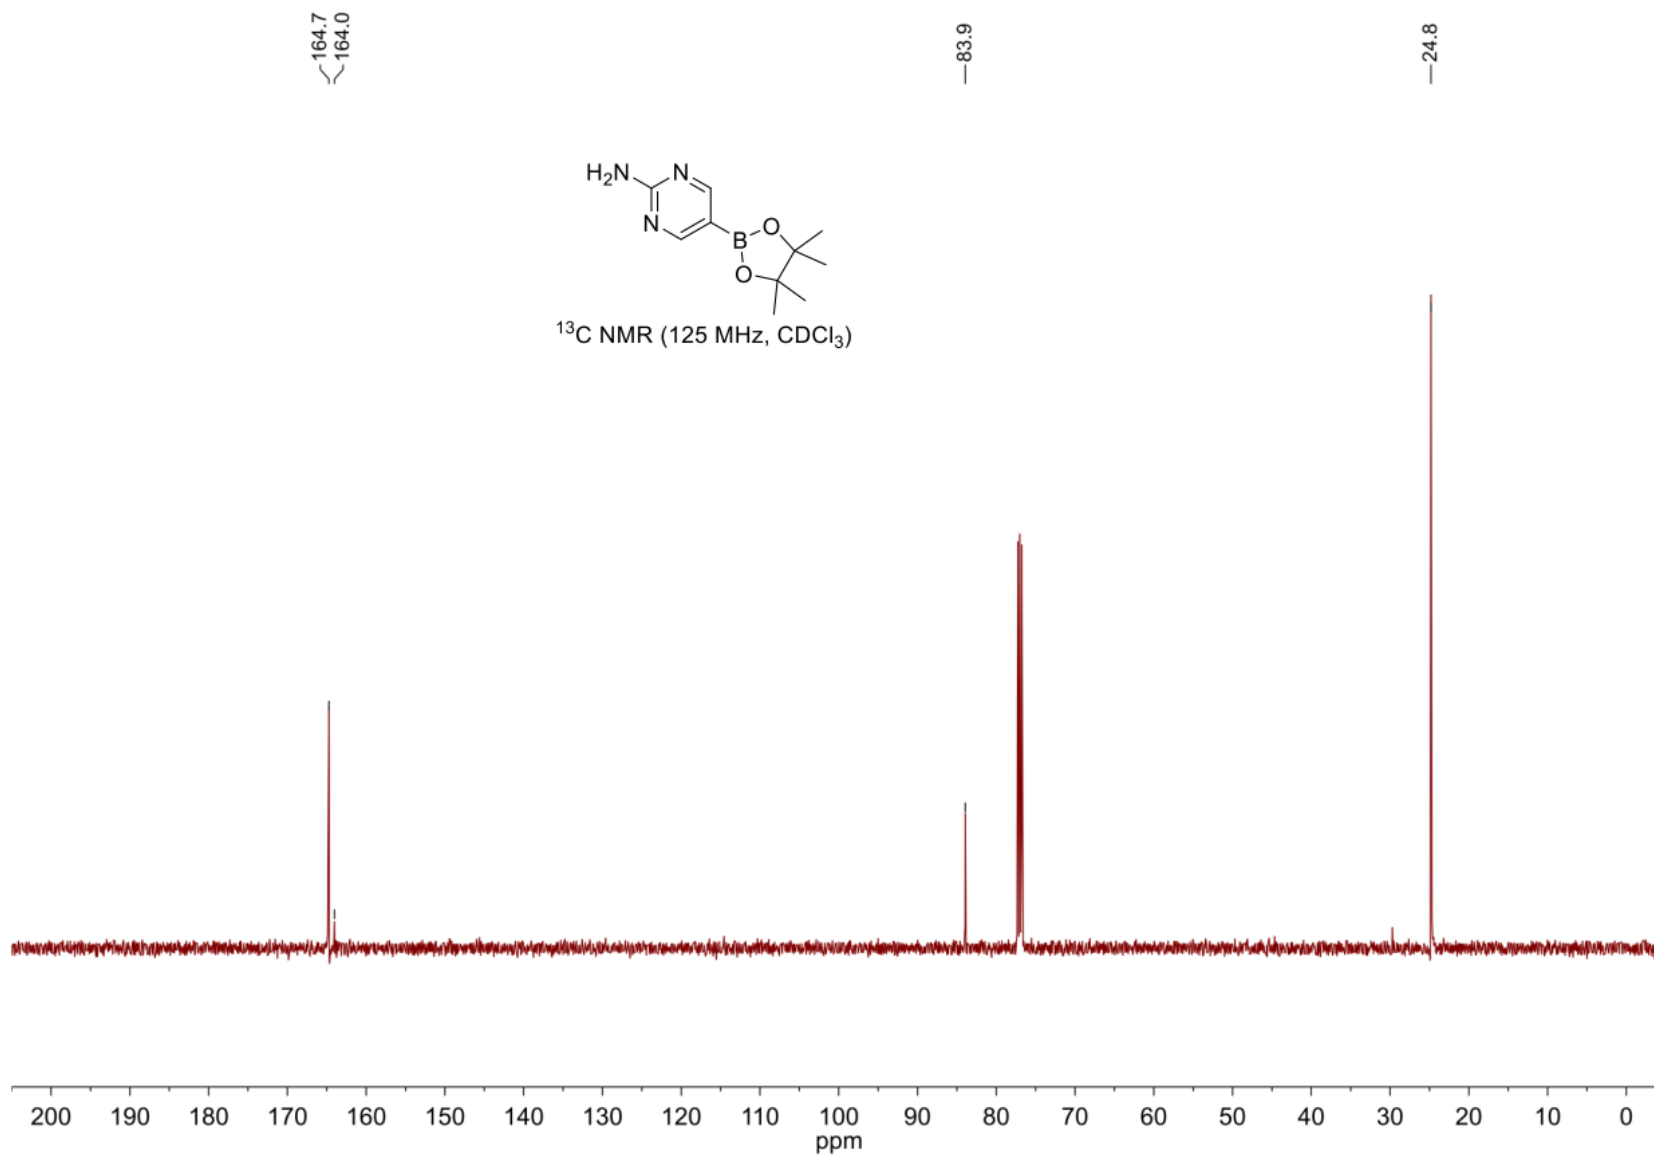

S458

## 2-Methyl-5-(trifluoro- $\lambda^4$ -boraneyl)pyrimidine, potassium salt (93)

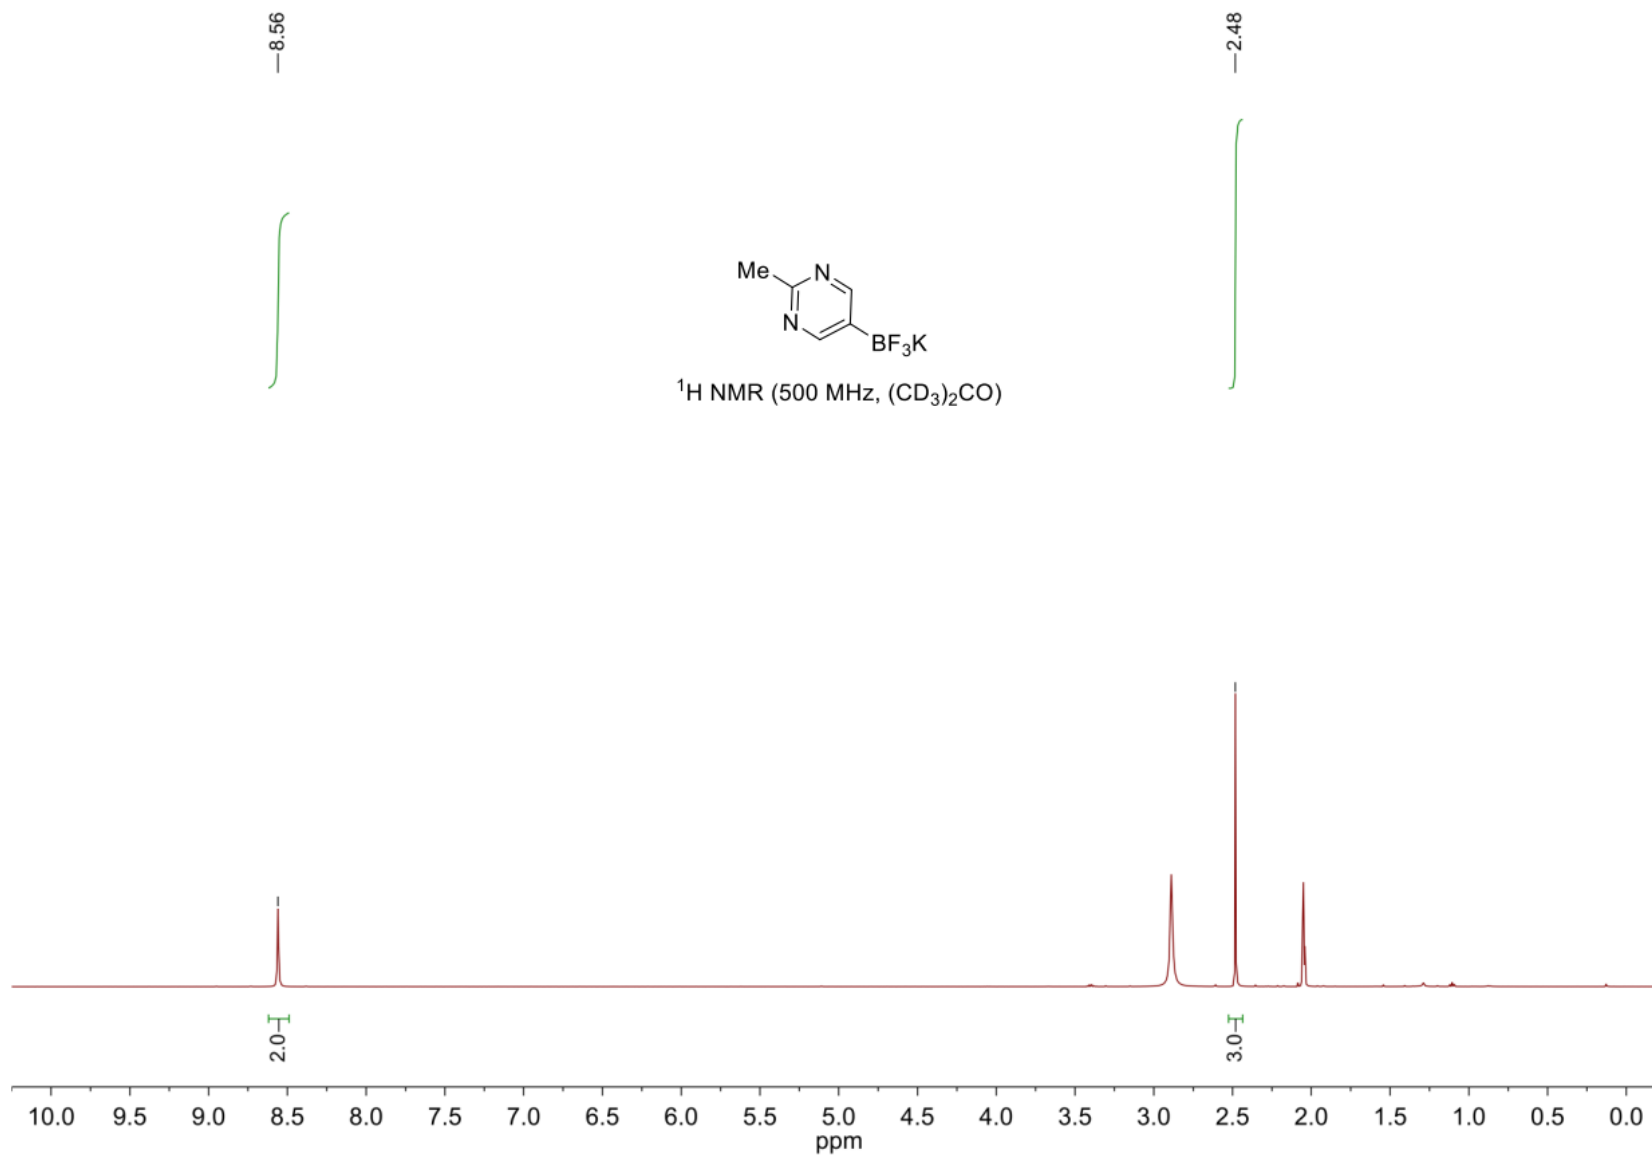

2-Methyl-5-(trifluoro- $\lambda^4$ -boraneyl)pyrimidine, potassium salt (93)

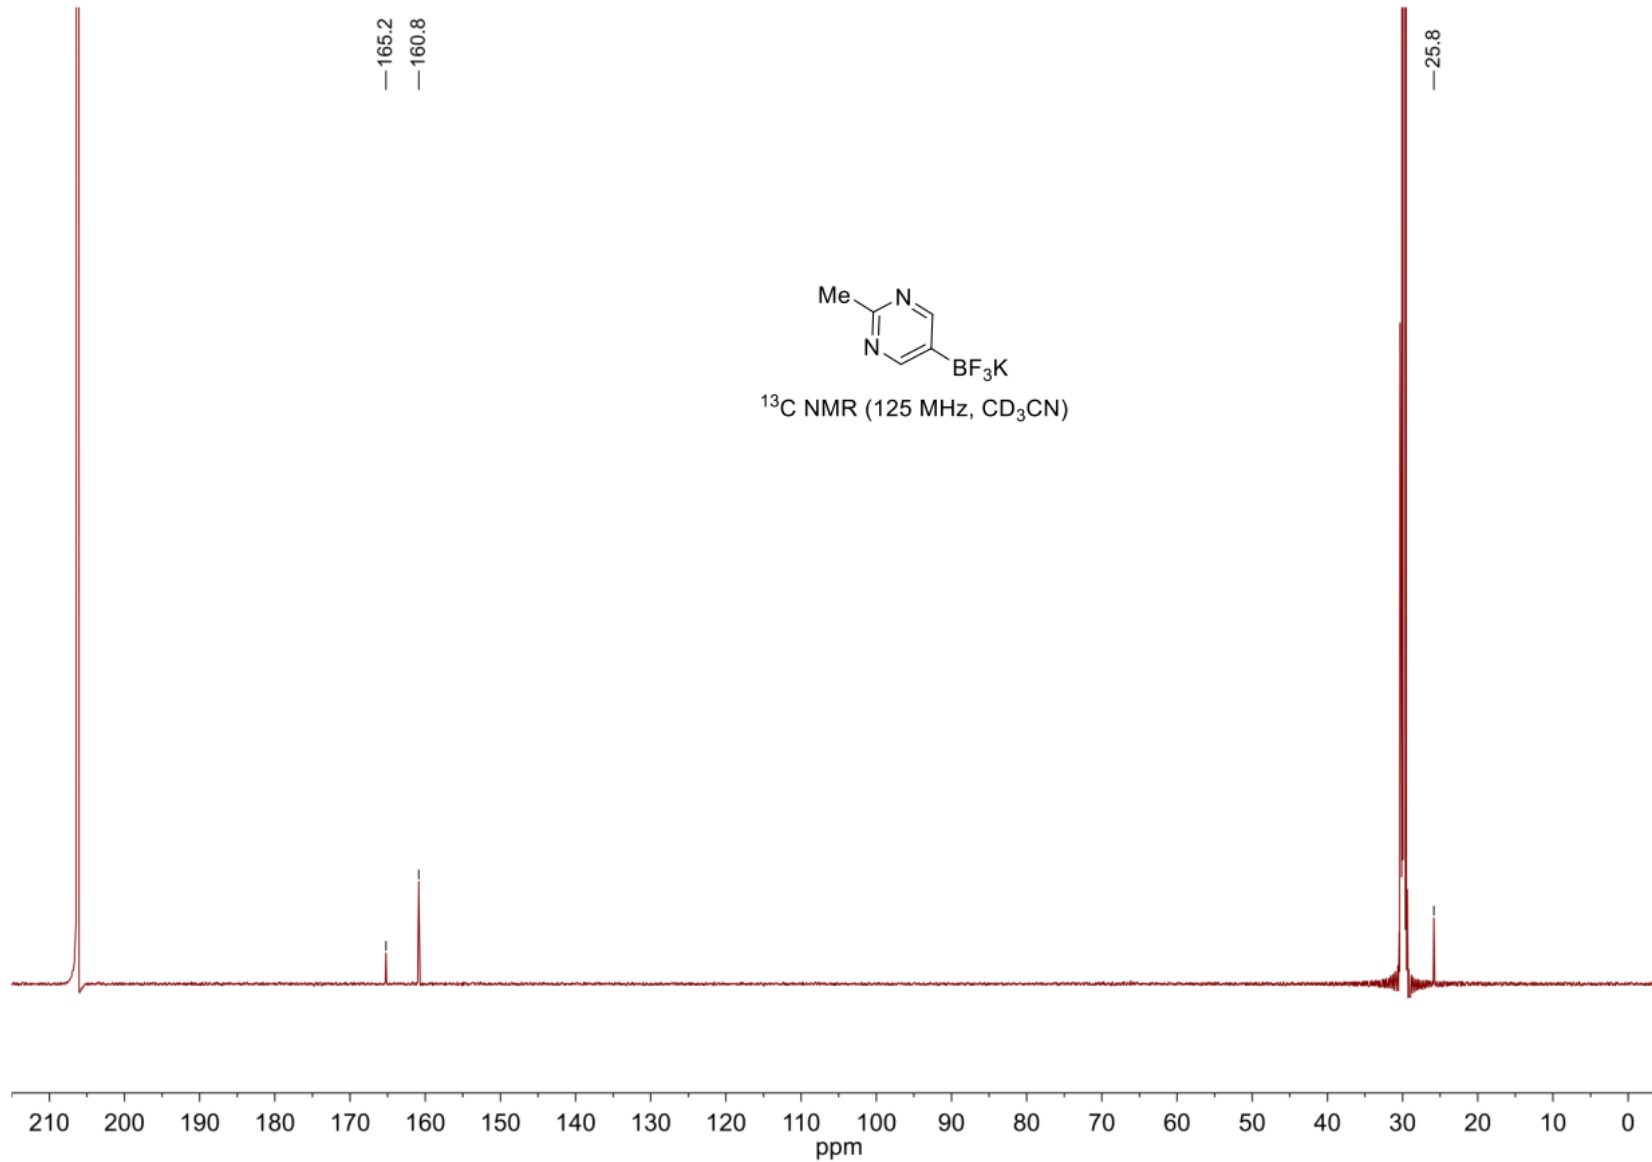

## 2-Methoxy-5-(trifluoro- $\lambda^4$ -boraneyl)pyrimidine, potassium salt (94)

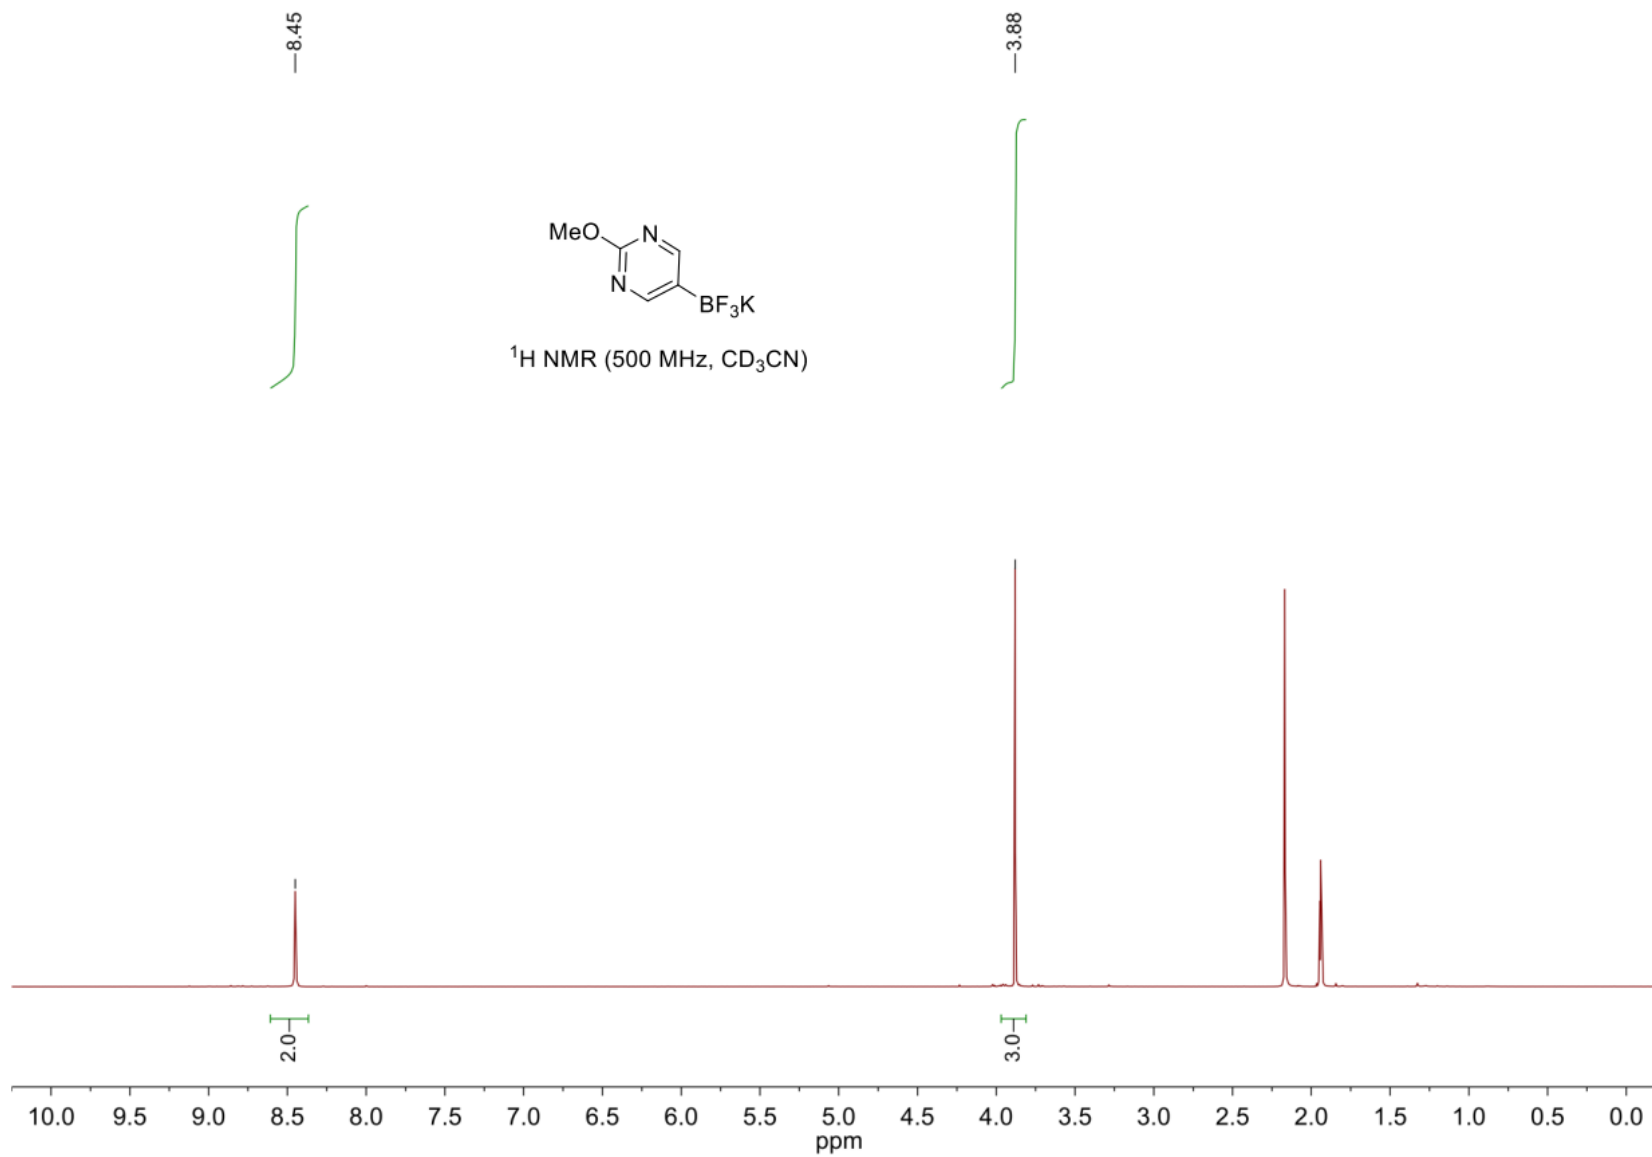

## 2-Methoxy-5-(trifluoro- $\lambda^4$ -boraneyl)pyrimidine, potassium salt (94)

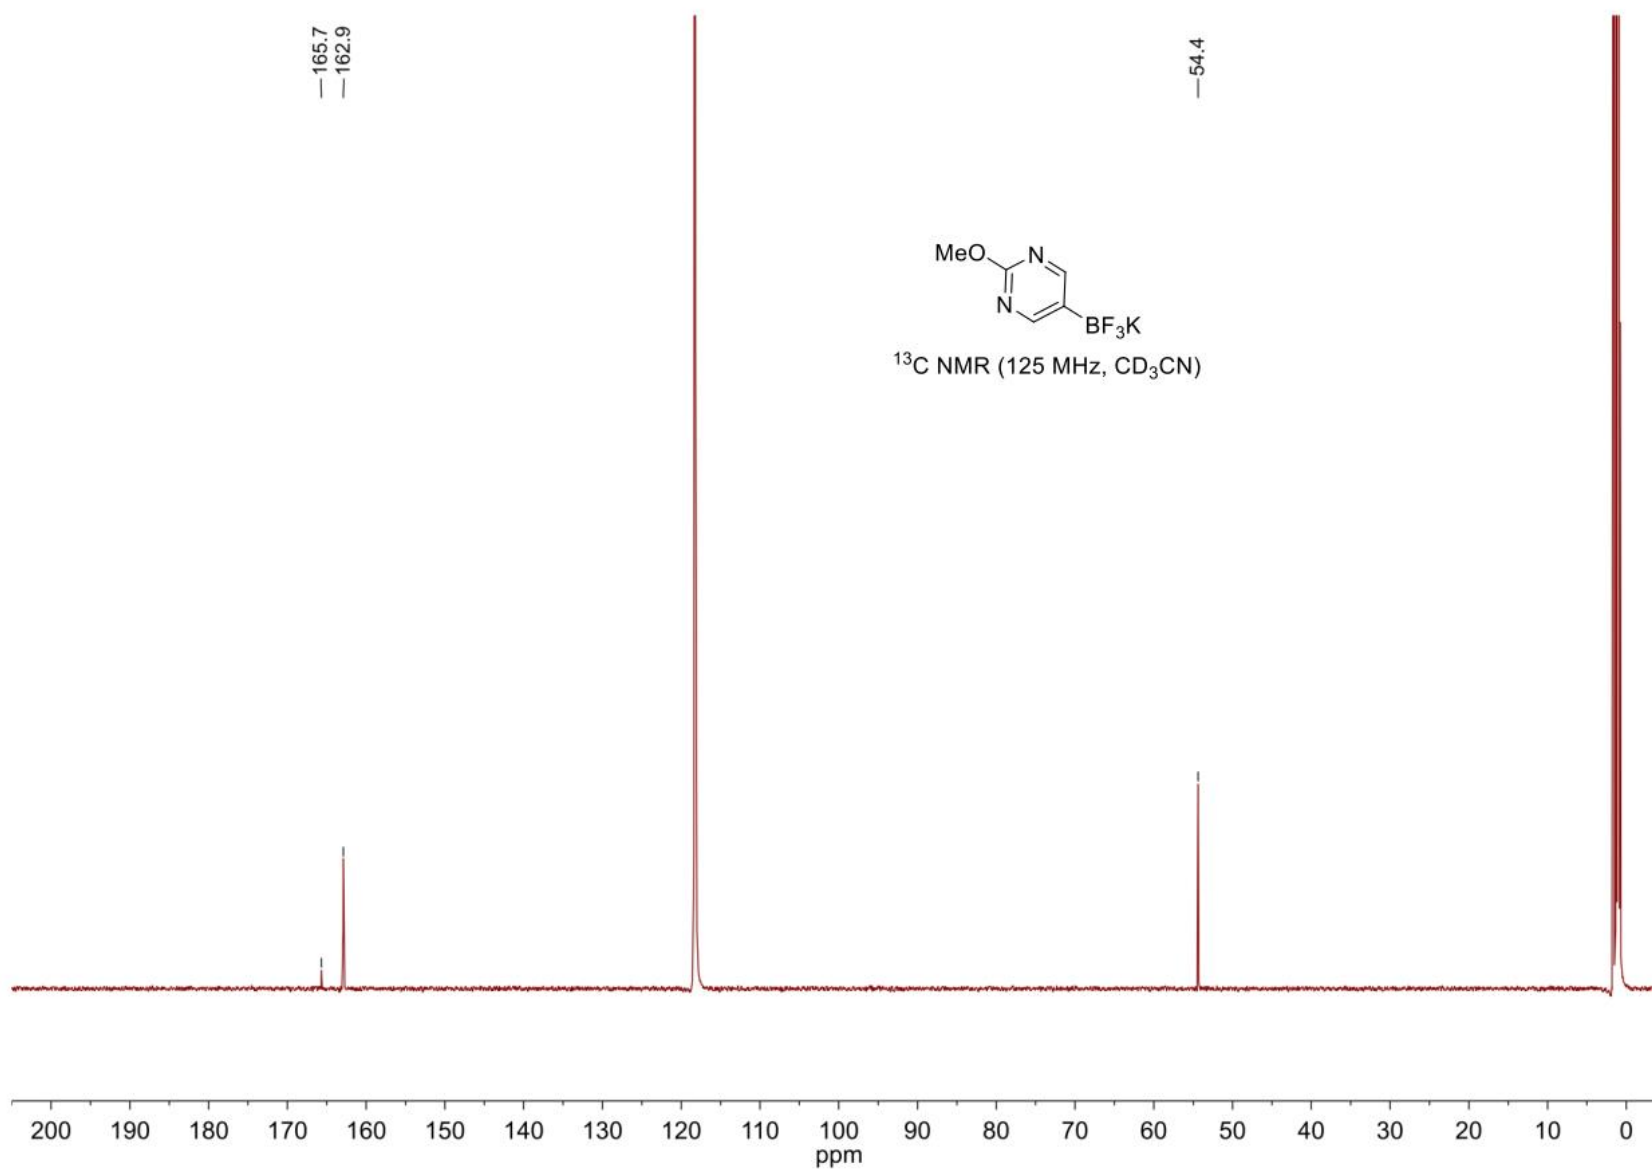

5-(Trifluoro- $\lambda^4$ -boraneyl)-1*H*-pyrrolo[2,3-*b*]pyridine, potassium salt (95)

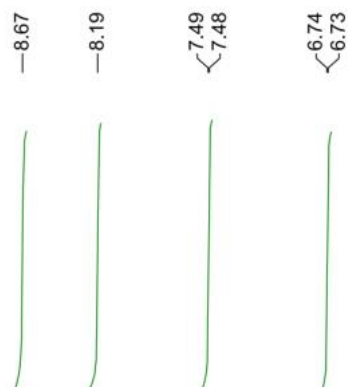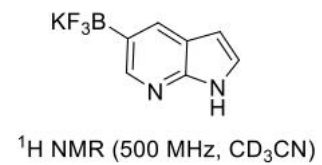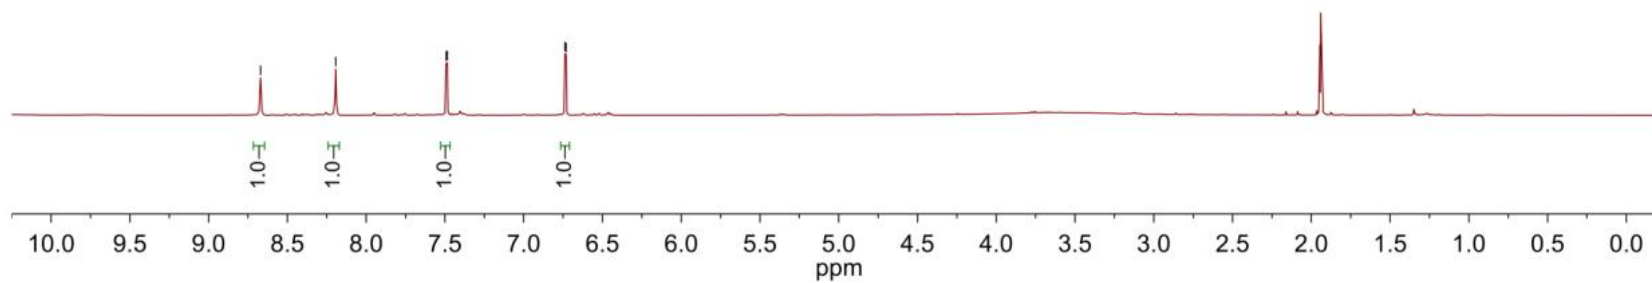

5-(Trifluoro- $\lambda^4$ -boraneyl)-1*H*-pyrrolo[2,3-*b*]pyridine, potassium salt (95)

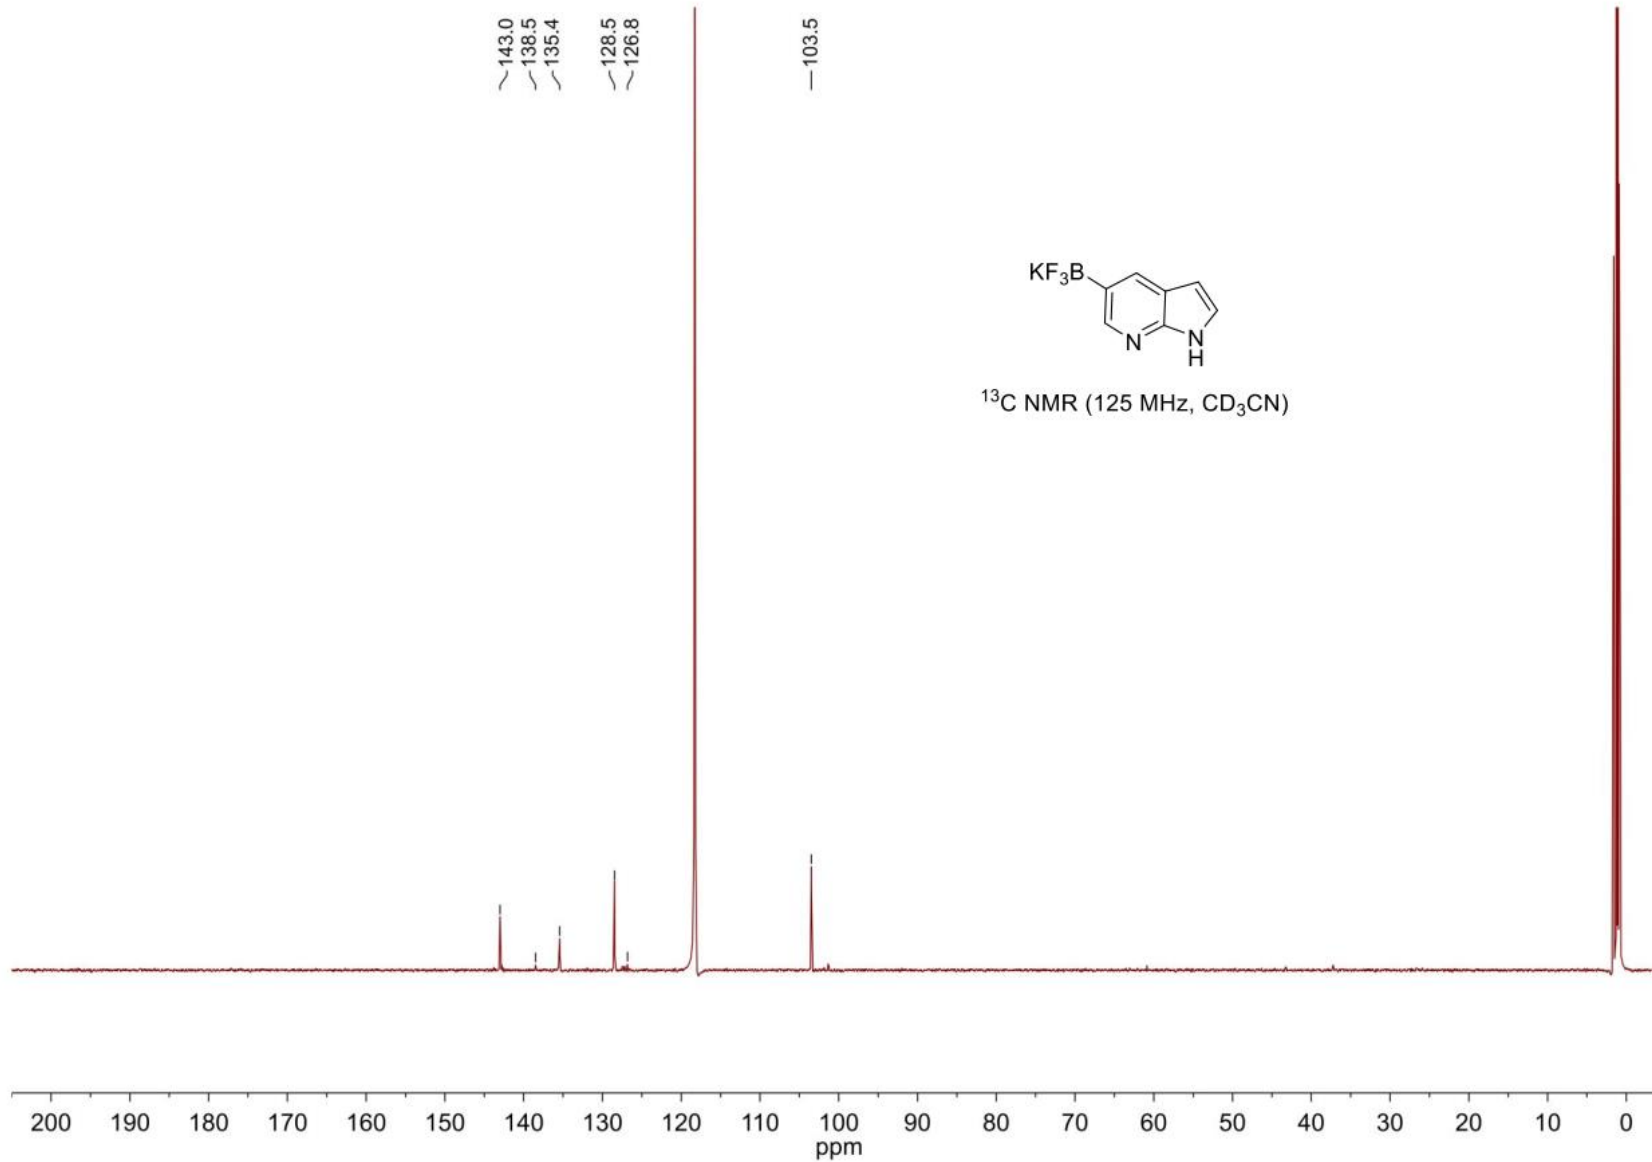



2-(Benzo[b]thiophen-6-yl)-4,4,5,5-tetramethyl-1,3,2-dioxaborolane (96)

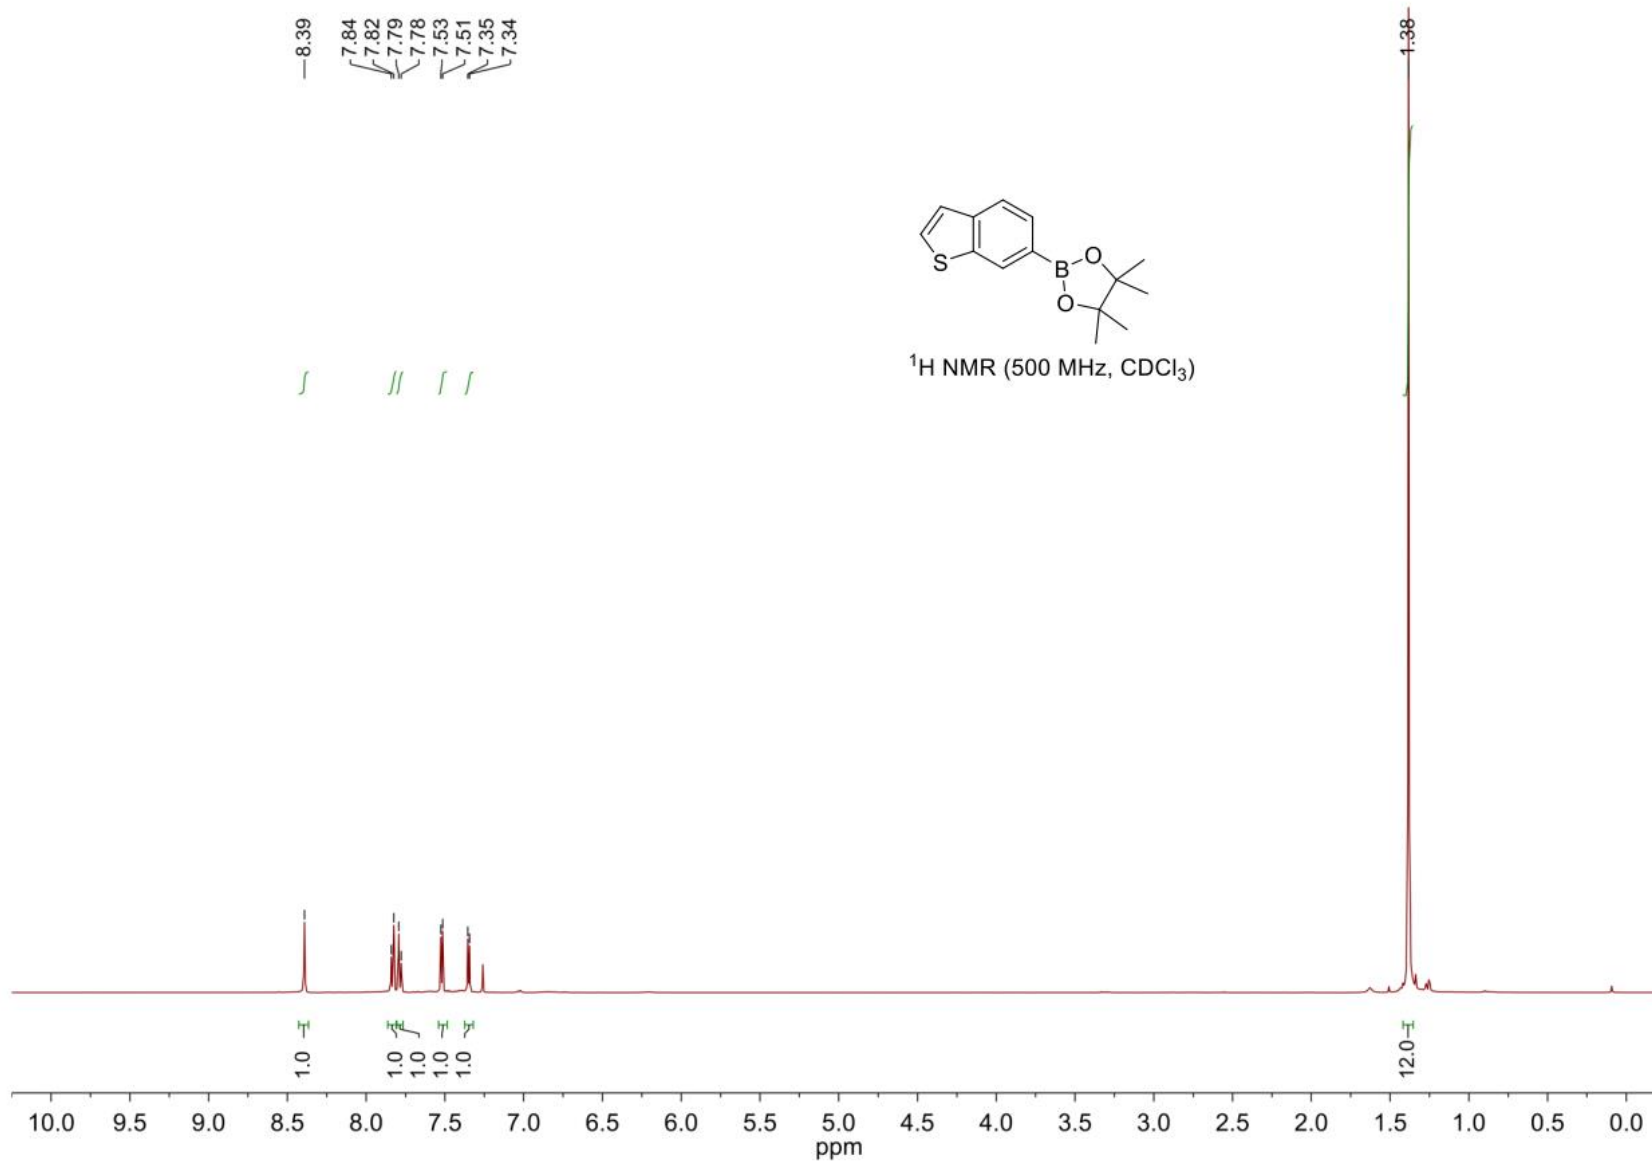

2-(Benzo[b]thiophen-6-yl)-4,4,5,5-tetramethyl-1,3,2-dioxaborolane (96)

141.9  
139.4  
129.9  
129.7  
128.3  
124.0  
123.1

84.0

25.0

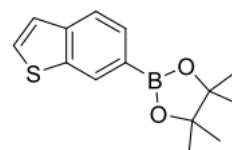

$^{13}\text{C}$  NMR (125 MHz,  $\text{CDCl}_3$ )

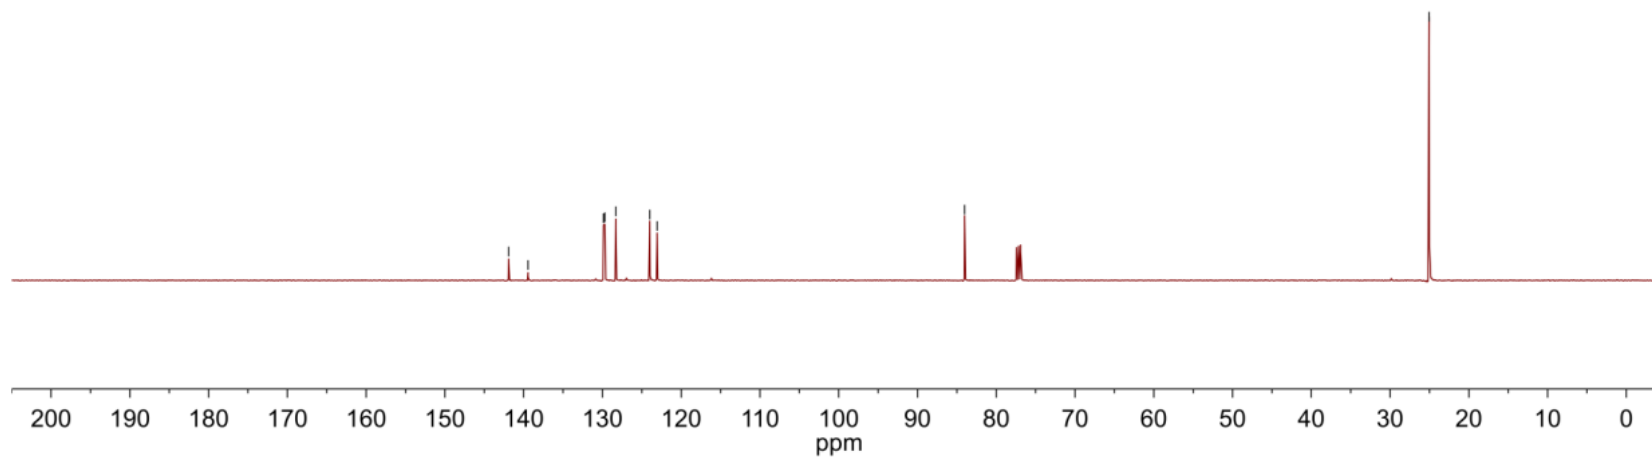

2-(Dibenzo[*b,d*]furan-2-yl)-4,4,5,5-tetramethyl-1,3,2-dioxaborolane (97)

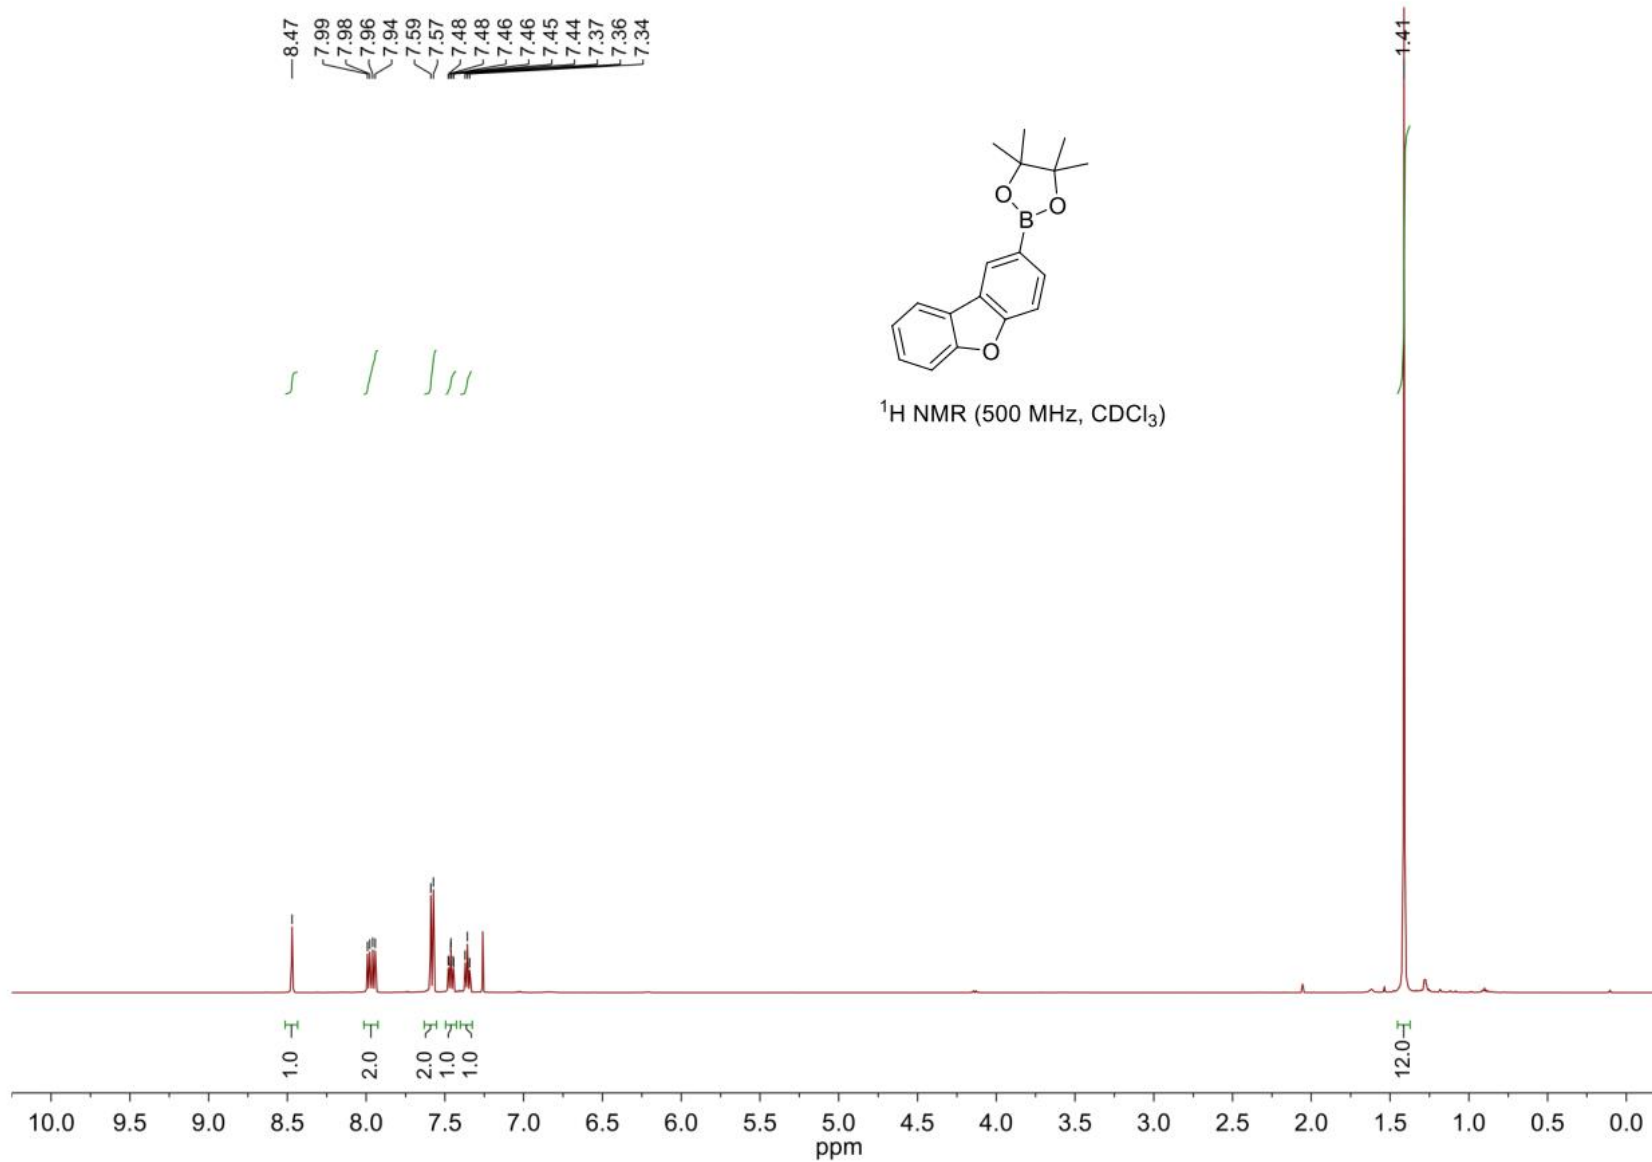

2-(Dibenzo[*b,d*]furan-2-yl)-4,4,5,5-tetramethyl-1,3,2-dioxaborolane (97)

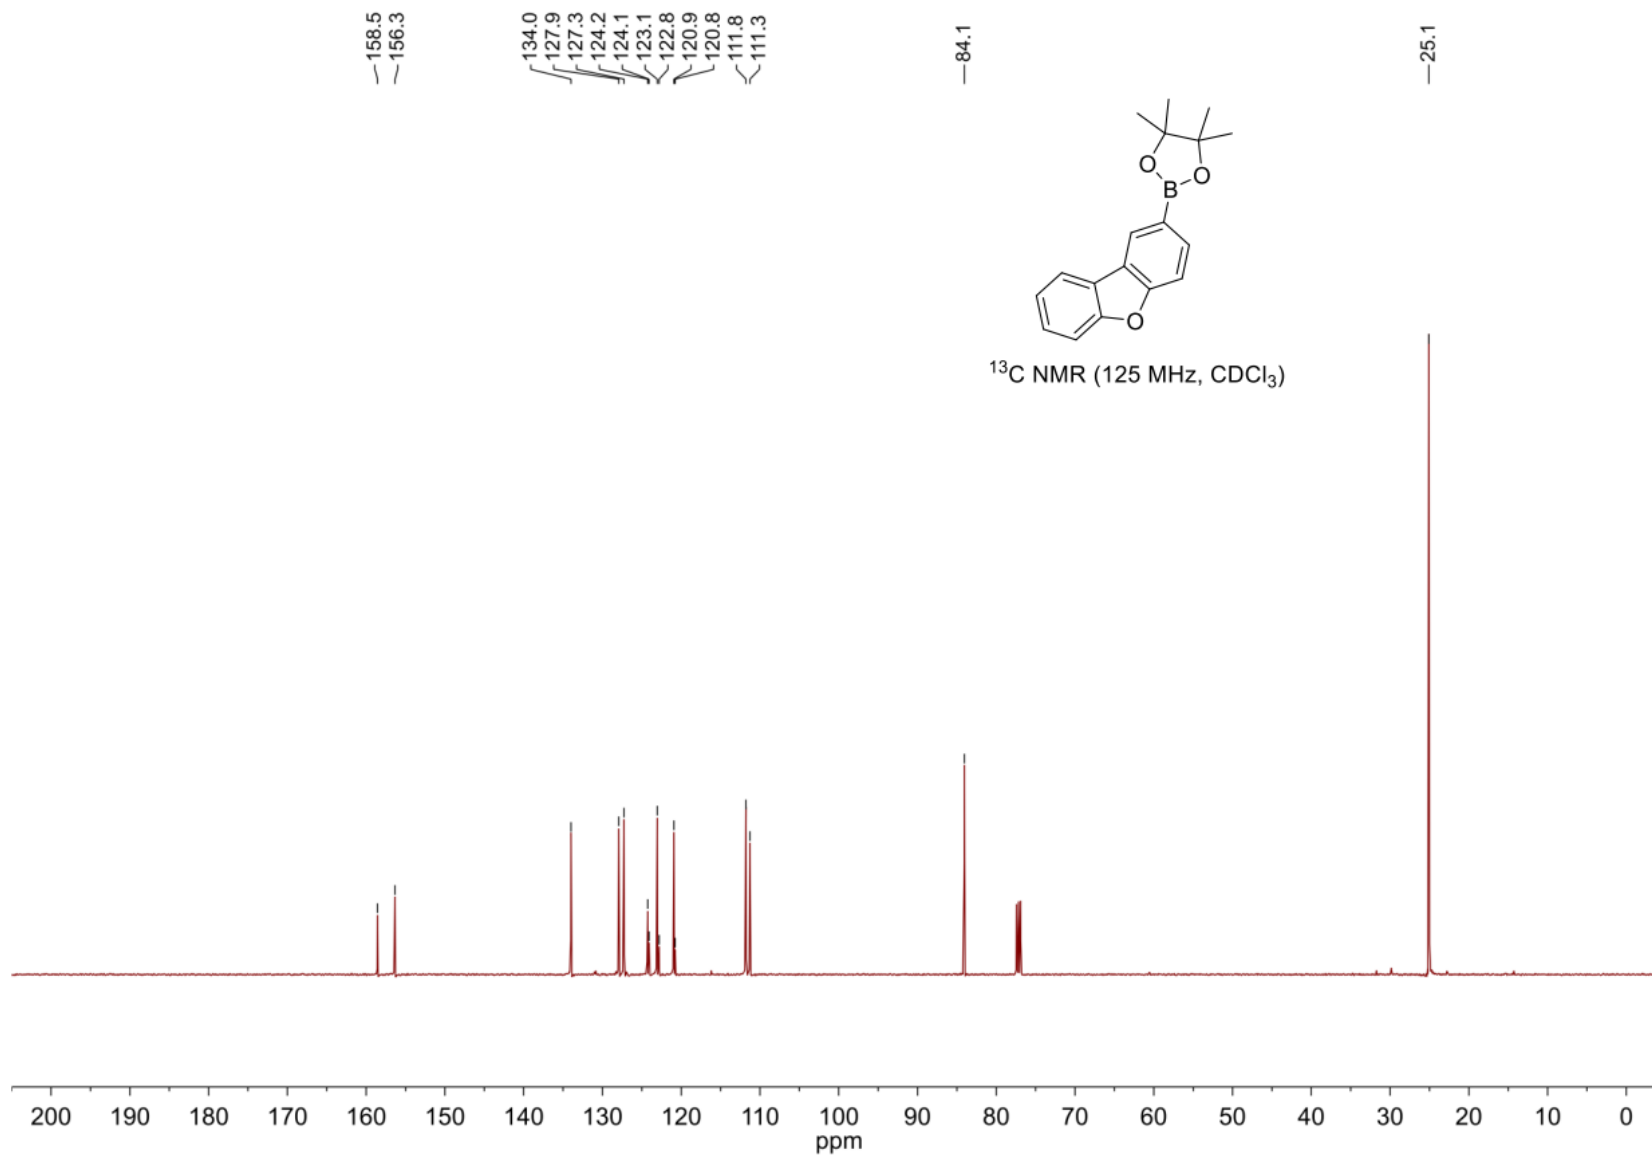

6-(4,4,5,5-Tetramethyl-1,3,2-dioxaborolan-2-yl)benzo[d]thiazole (98)

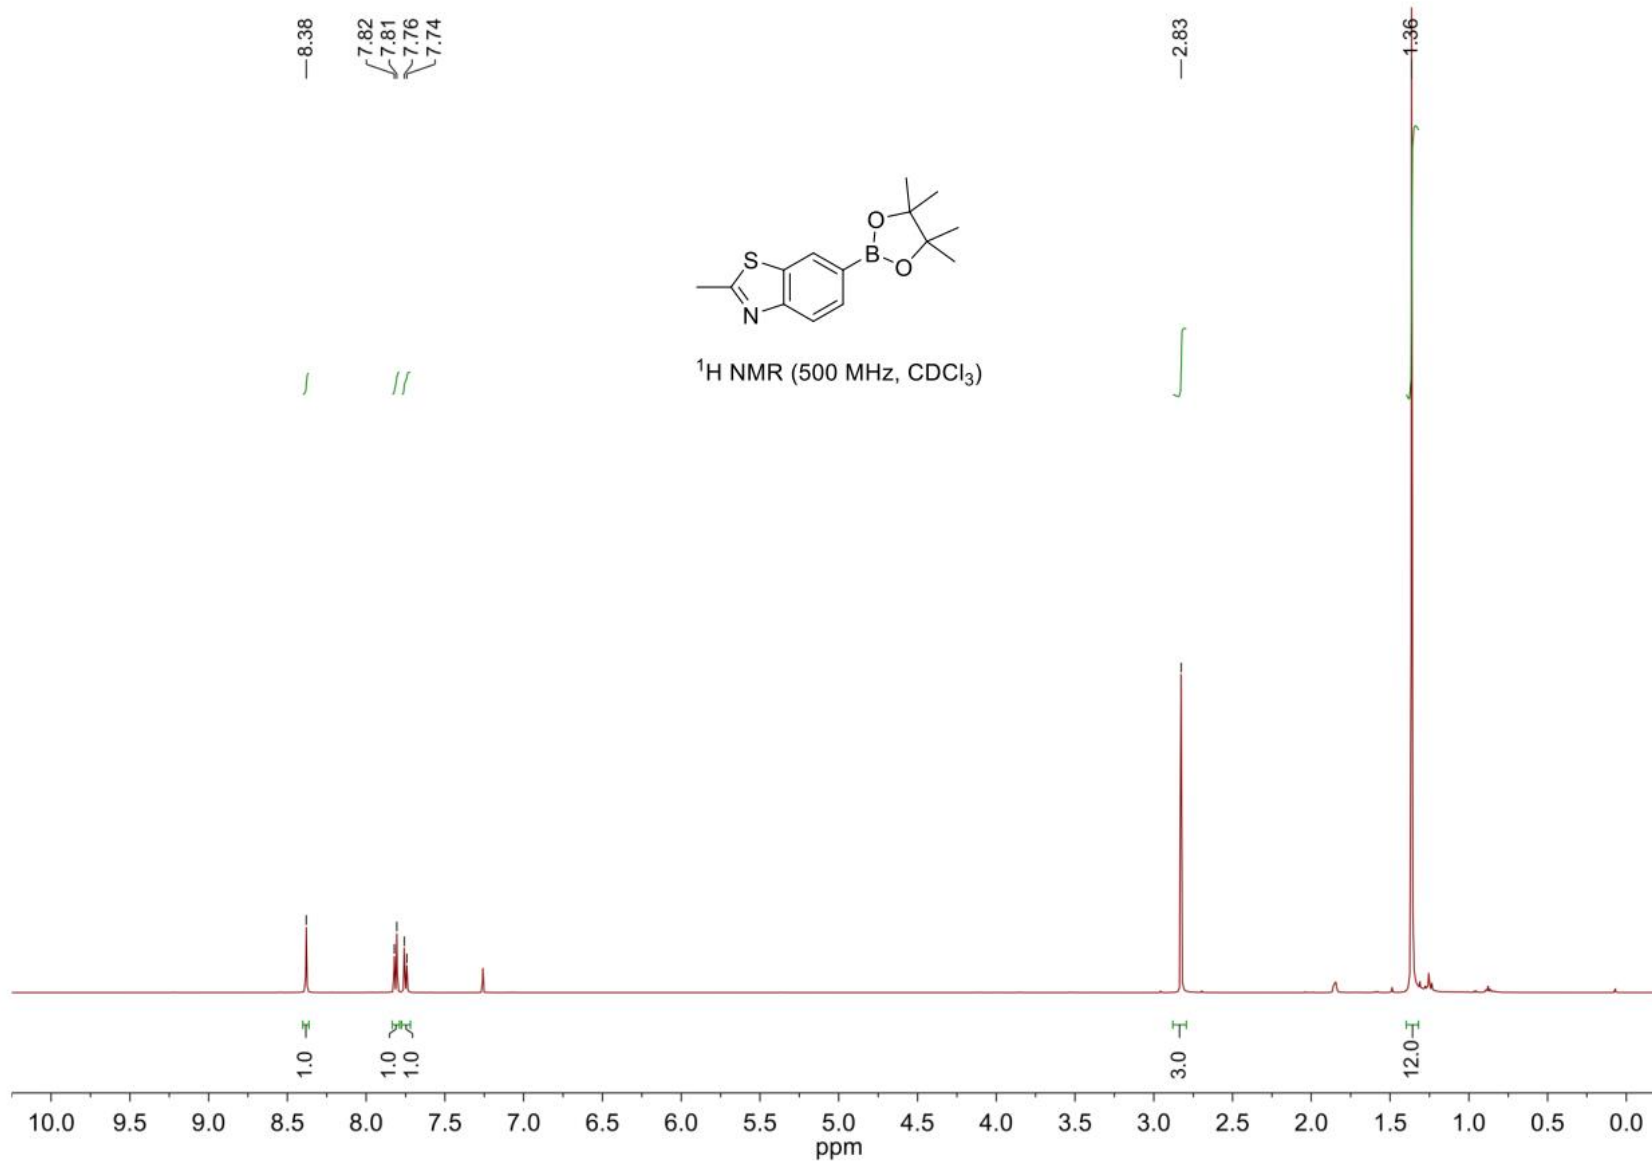

6-(4,4,5,5-Tetramethyl-1,3,2-dioxaborolan-2-yl)benzo[d]thiazole (98)

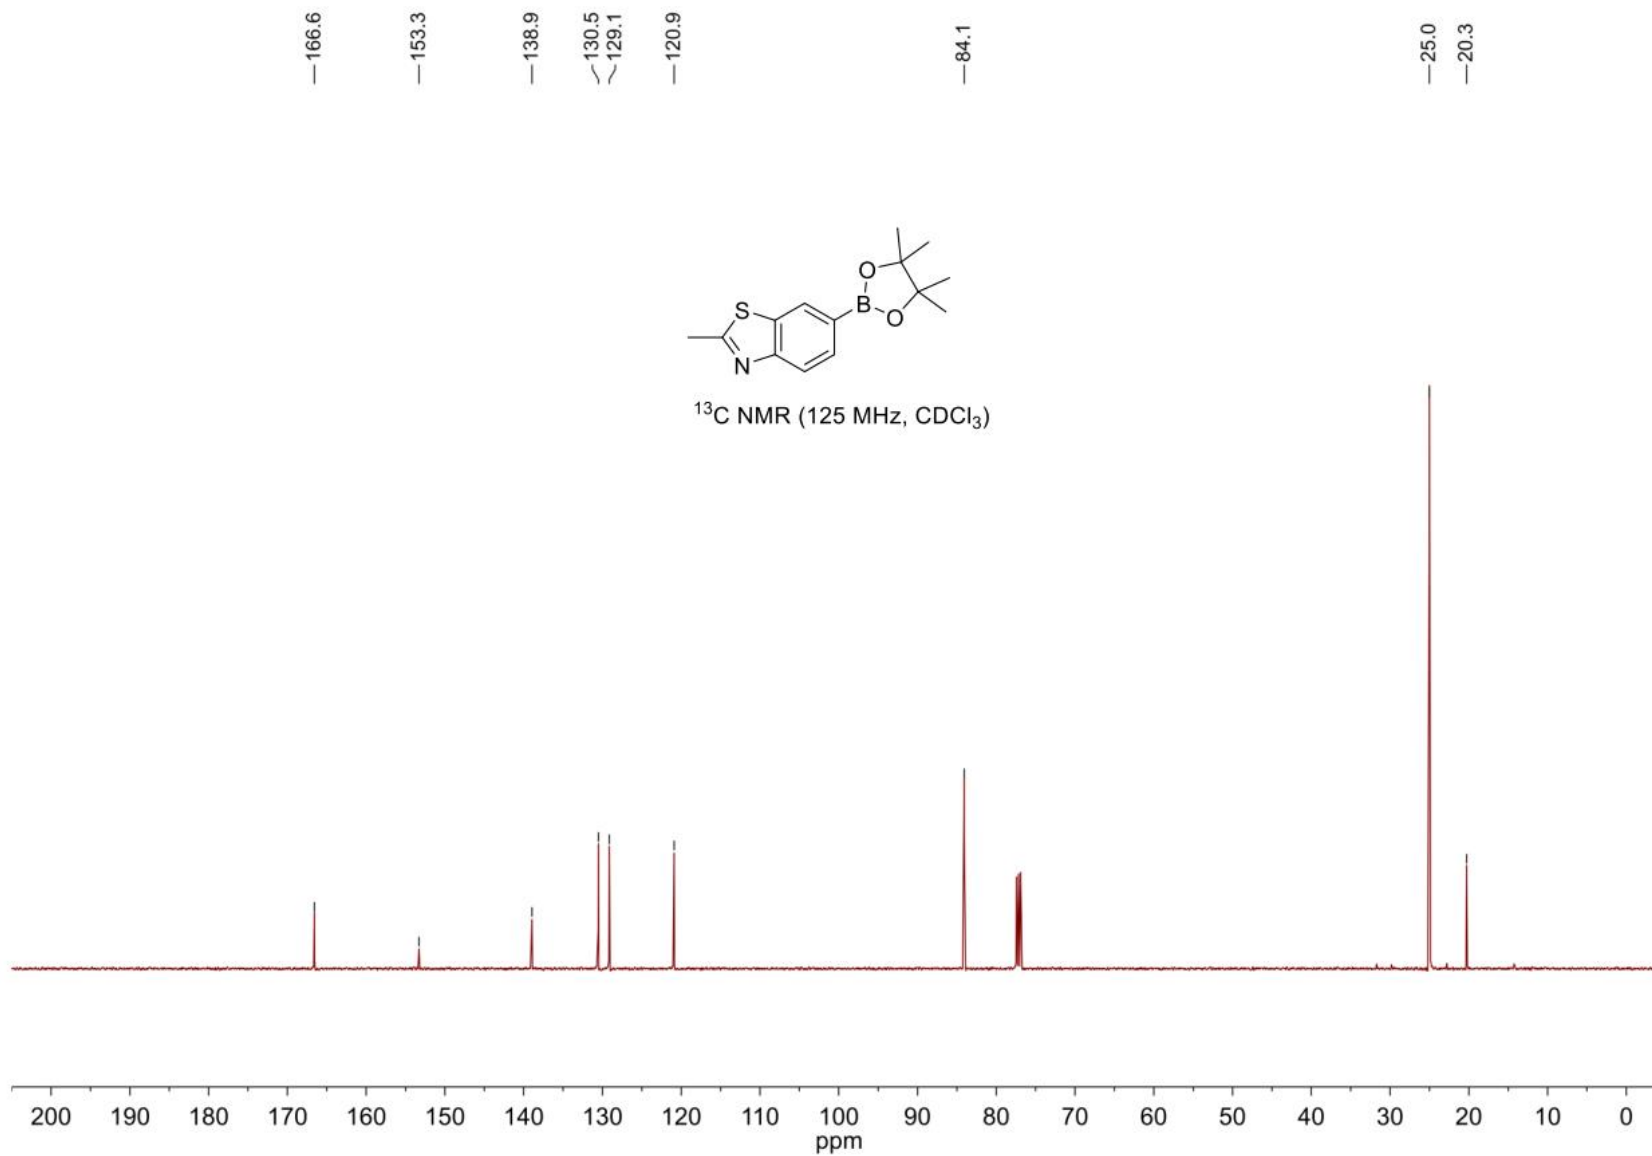

2-(Benzofuran-5-yl)-4,4,5,5-tetramethyl-1,3,2-dioxaborolane (98)

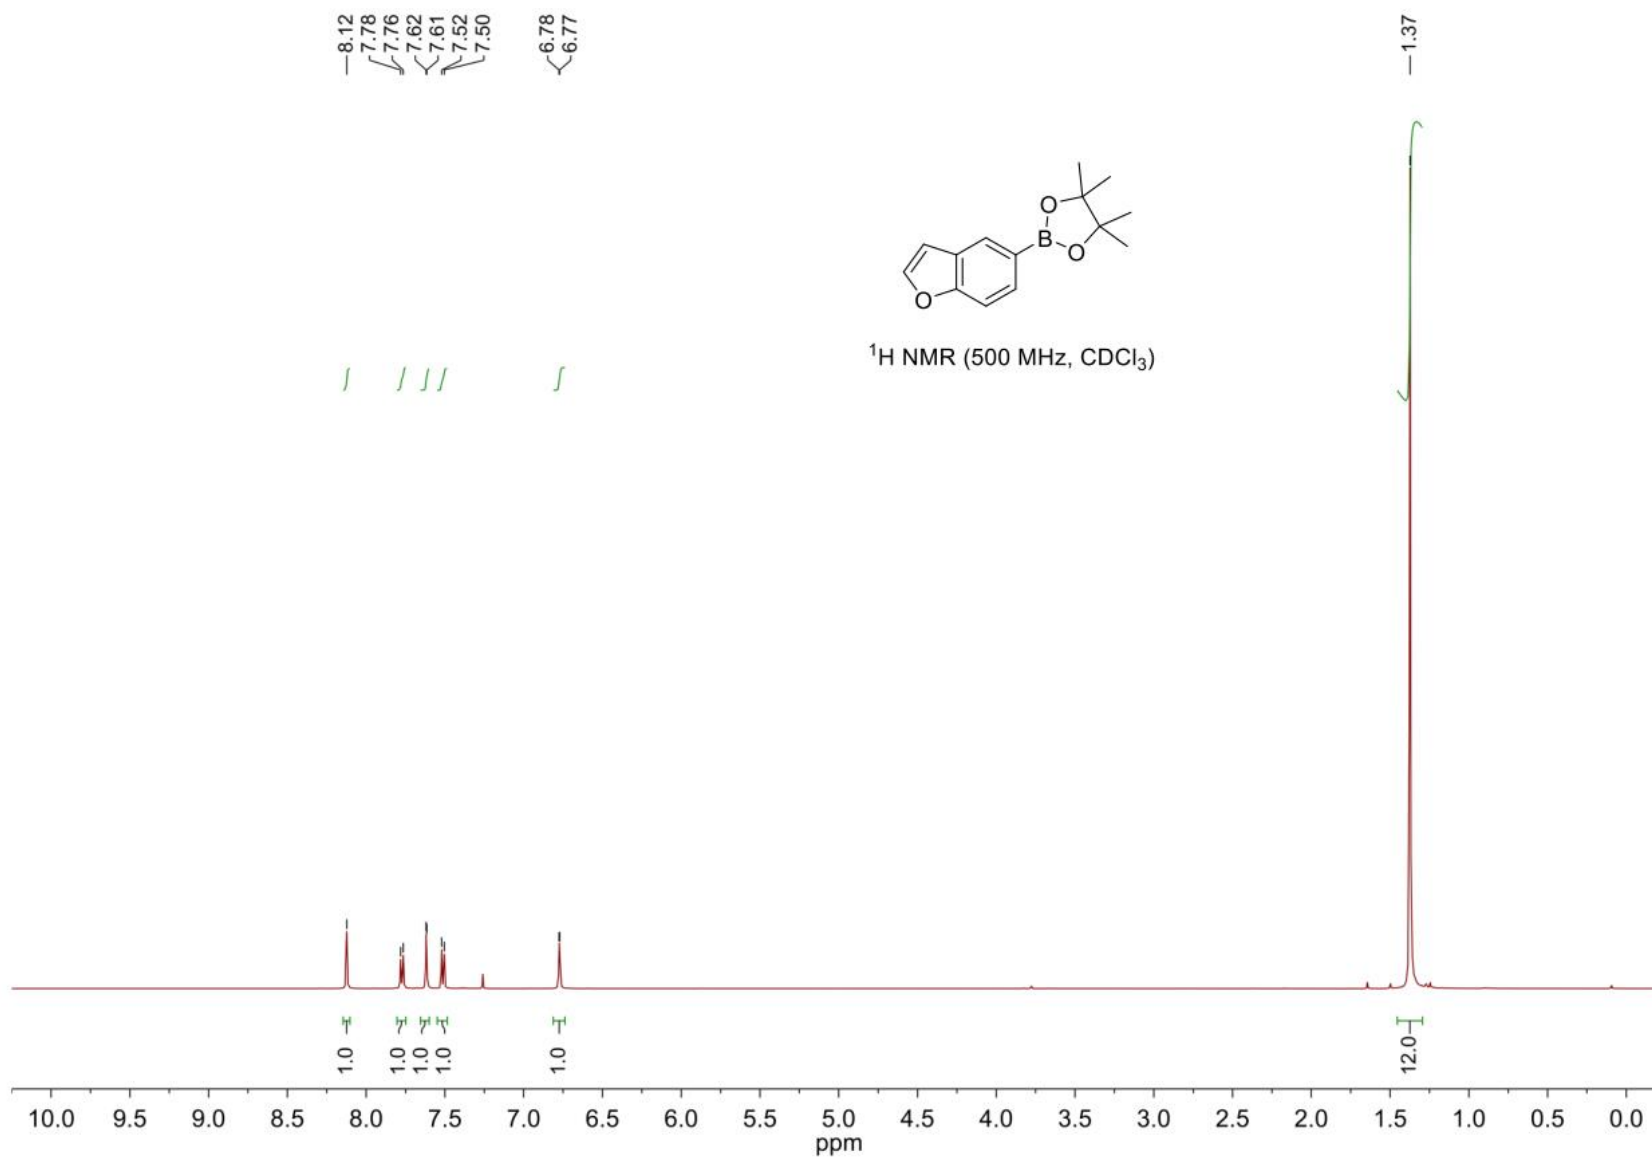

S471

2-(Benzofuran-5-yl)-4,4,5,5-tetramethyl-1,3,2-dioxaborolane (99)

—157.1 —145.0  
~130.9 ~128.8 ~127.2  
—111.0 —106.8  
—83.9  
—25.0

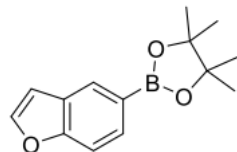

$^{13}\text{C}$  NMR (125 MHz,  $\text{CDCl}_3$ )

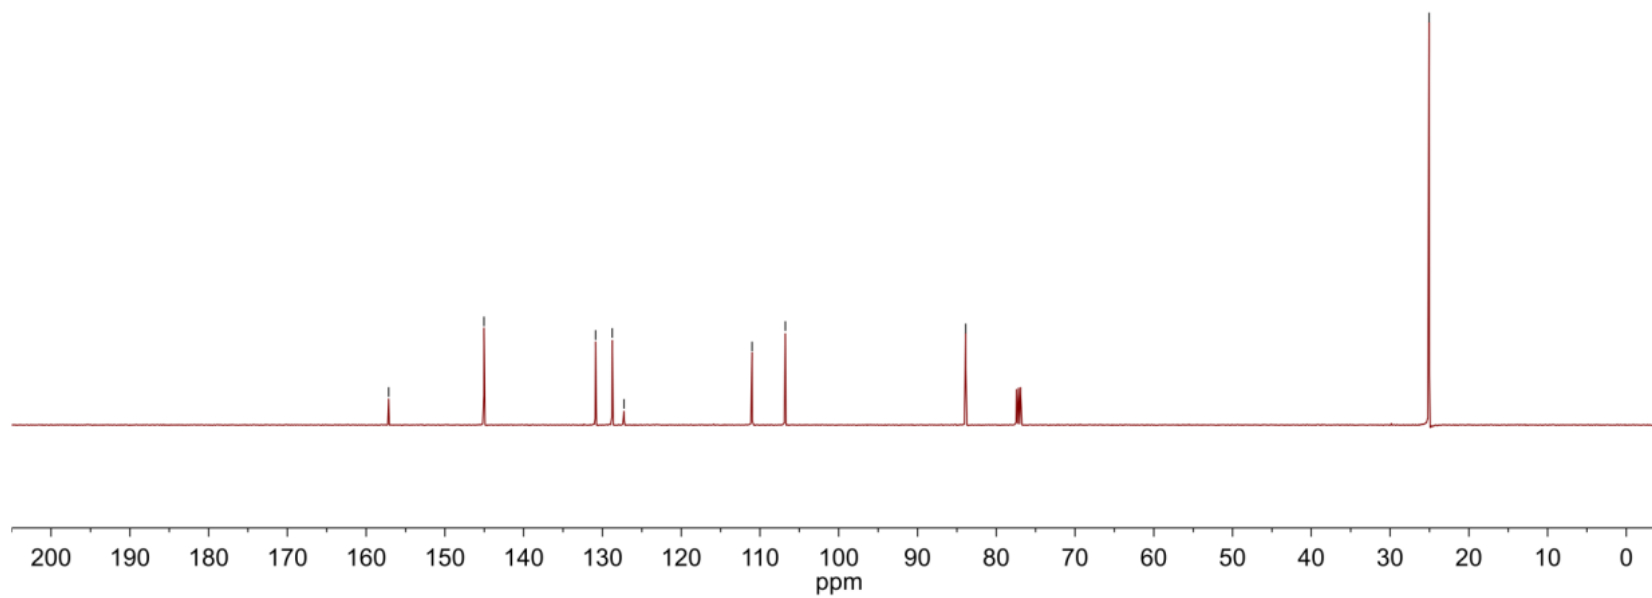

S472



4,4,5,5-Tetramethyl-2-(5-methylthiophen-3-yl)-1,3,2-dioxaborolane (100)

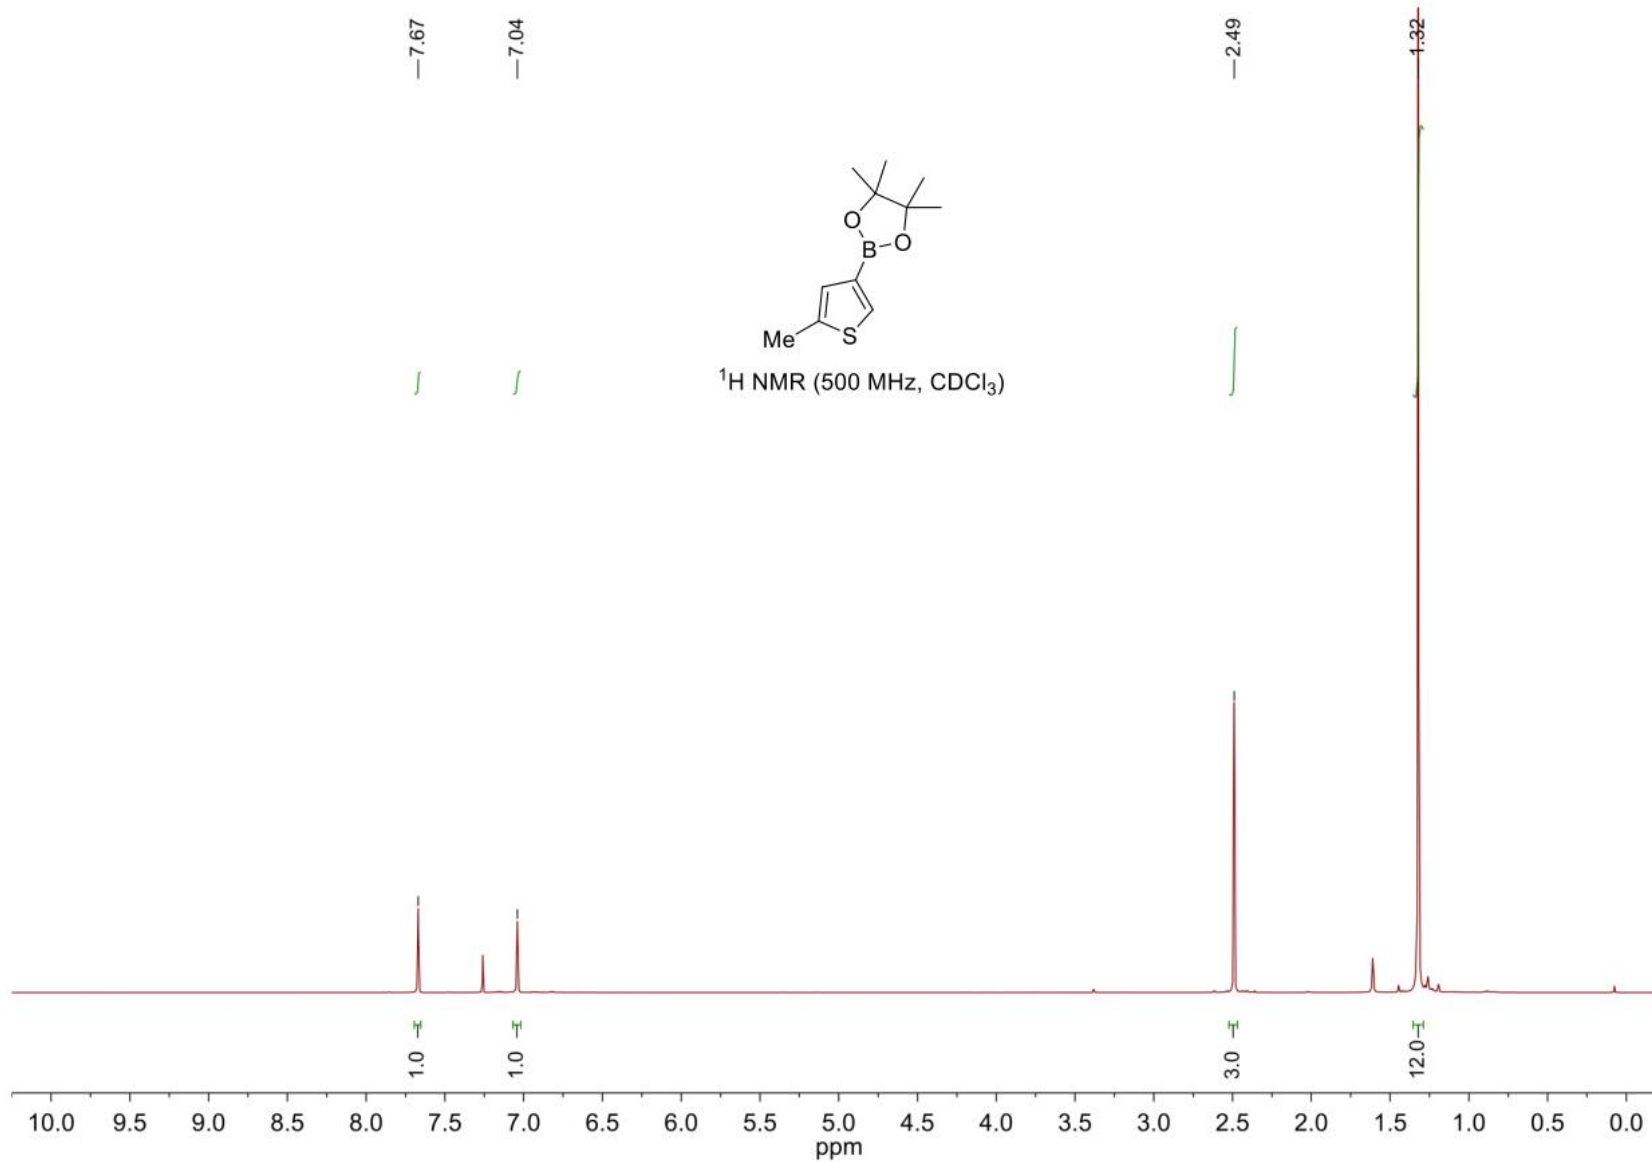

4,4,5,5-Tetramethyl-2-(5-methylthiophen-3-yl)-1,3,2-dioxaborolane (100)

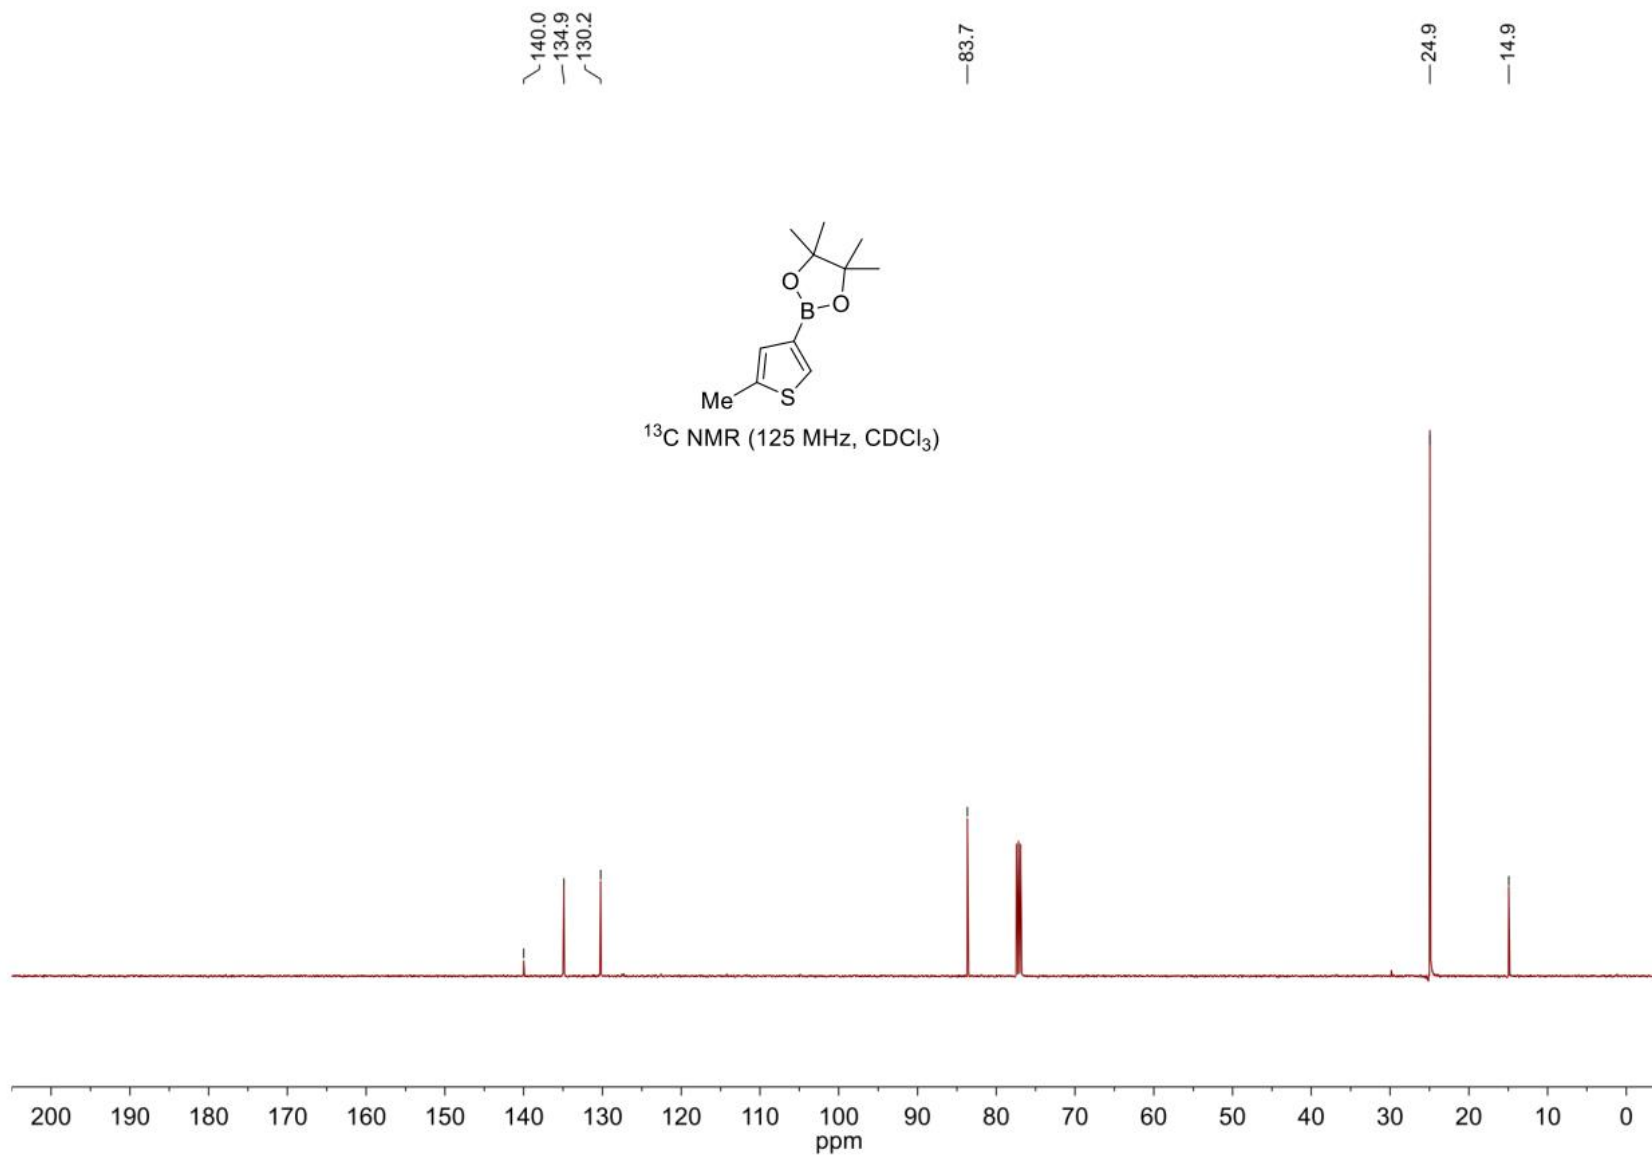

2-(3-(Methoxymethyl)-4-(((2R,3R,4S,5R,6R)-2,3,5-trimethoxy-6-(methoxymethyl)tetrahydro-2H-pyran-4-yl)oxy)phenyl)-4,4,5,5-tetramethyl-1,3,2-dioxaborolane (101)

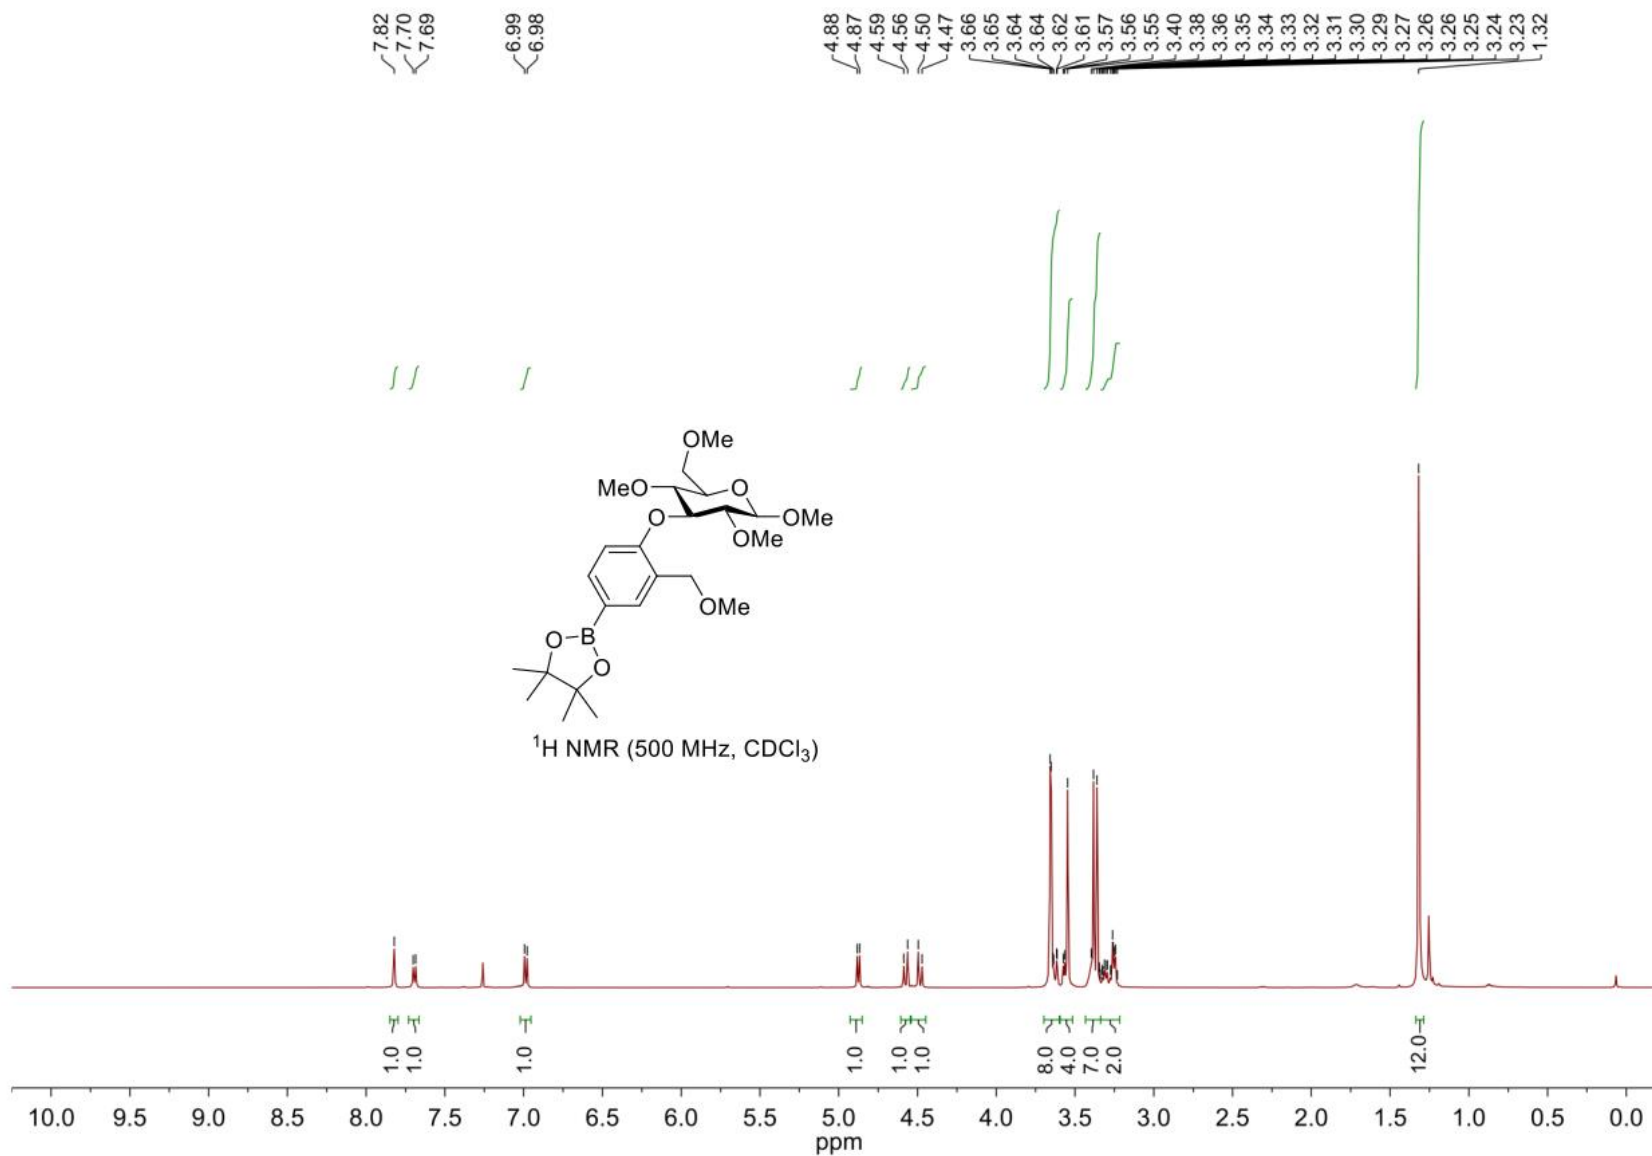

S475

2-(3-(Methoxymethyl)-4-(((2*R*,3*R*,4*S*,5*R*,6*R*)-2,3,5-trimethoxy-6-(methoxymethyl)tetrahydro-2*H*-pyran-4-yl)oxy)phenyl)-4,4,5,5-tetramethyl-1,3,2-dioxaborolane (101)

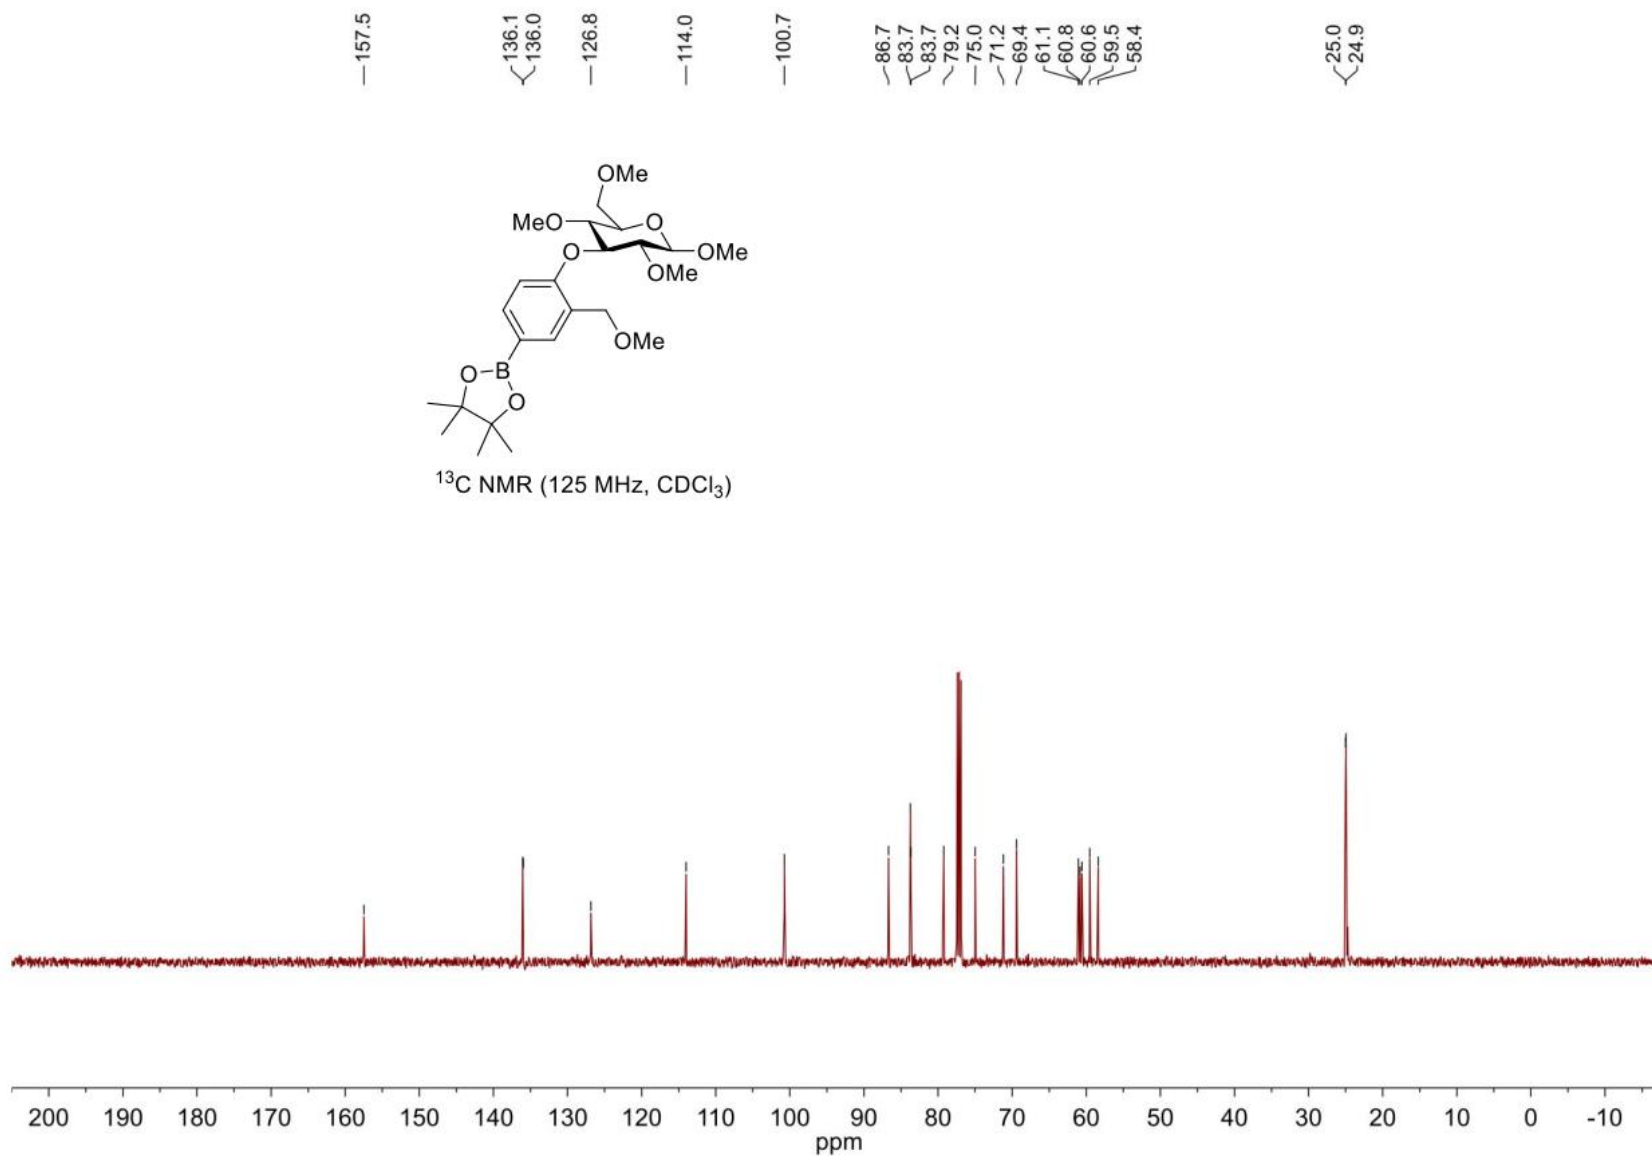

S476

(4aR,4a1R,5aS,8aR,8a1S,15aS)-10-(Trifluoro-14-boraneyl)-2,4a,4a1,5,5a,7,8,8a1,15,15a-decahydro-14H-4,6-methanoindolo[3,2,1-*ij*]oxepino[2,3,4-*de*]pyrrolo[2,3-*h*]quinolin-14-one, potassium salt (102)

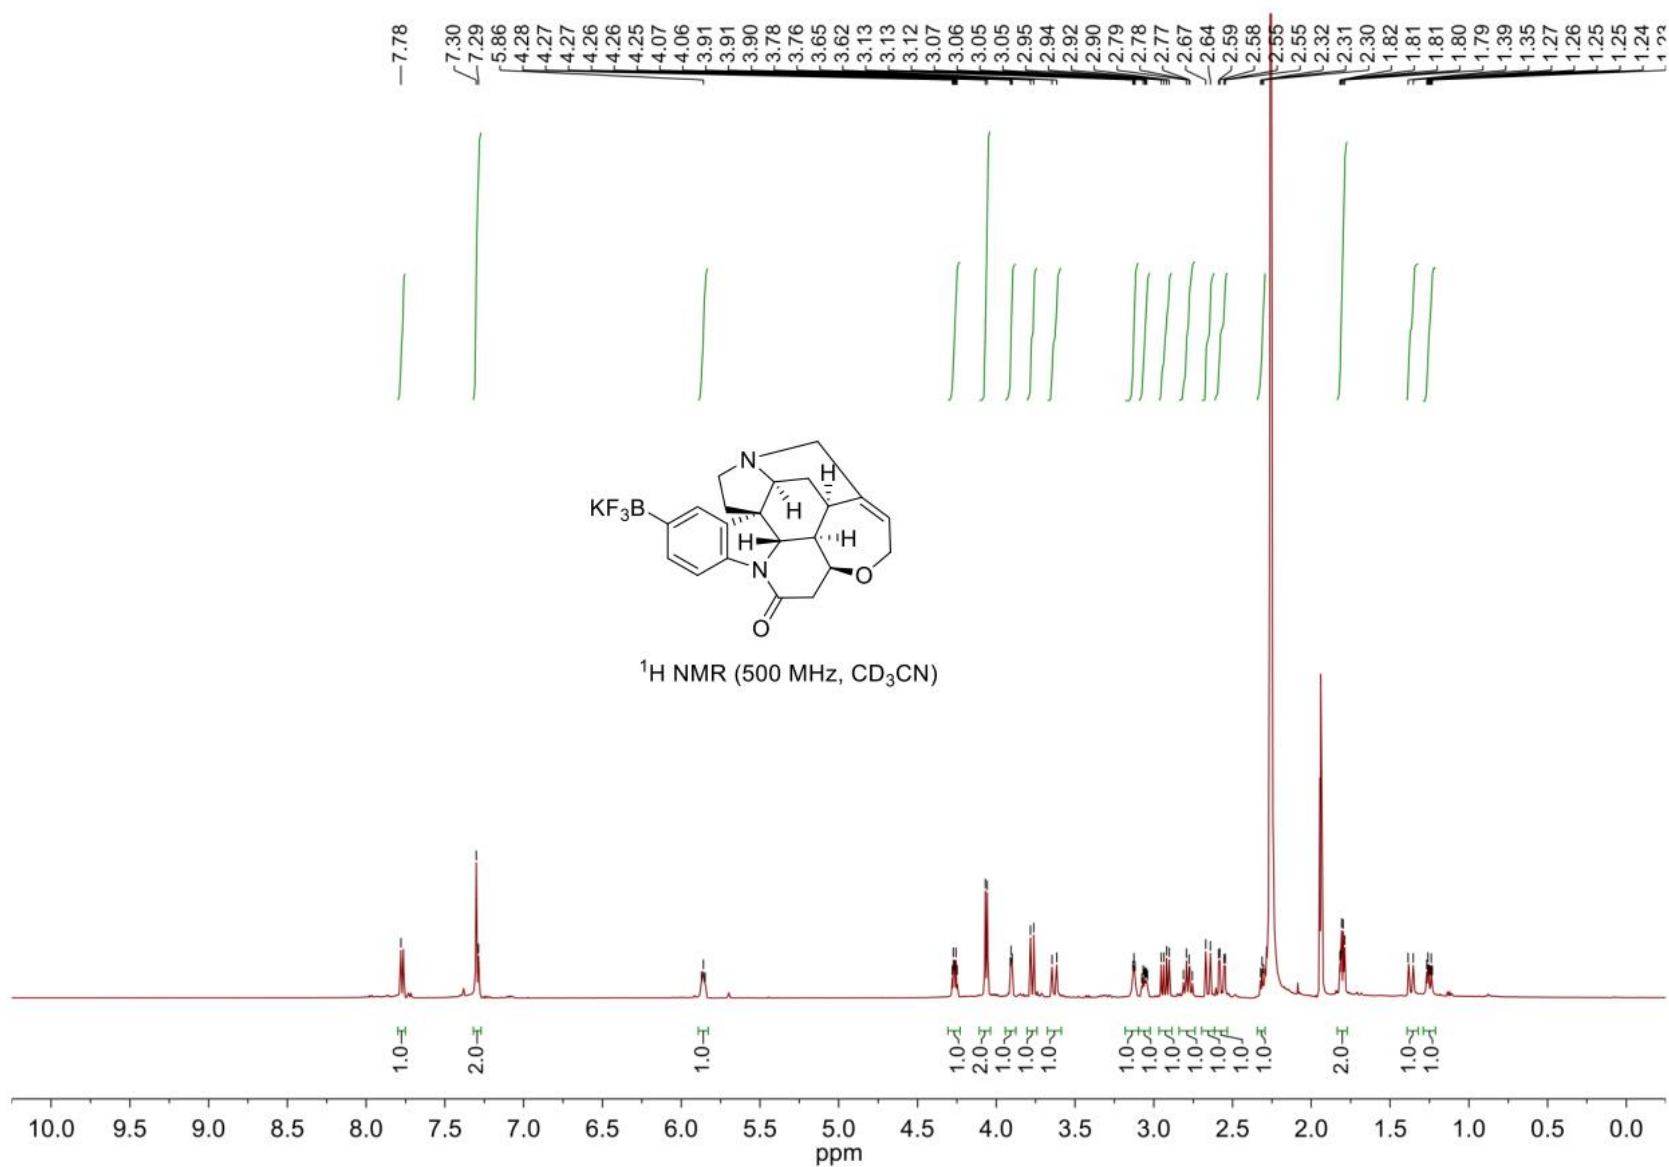

(4aR,4a1R,5aS,8aR,8a1S,15aS)-10-(Trifluoro-14-boraneyl)-2,4a,4a1,5,5a,7,8,8a1,15,15a-decahydro-14H-4,6-methanoindolo[3,2,1-*ij*]oxepino[2,3,4-*de*]pyrrolo[2,3-*h*]quinolin-14-one, potassium salt (102)

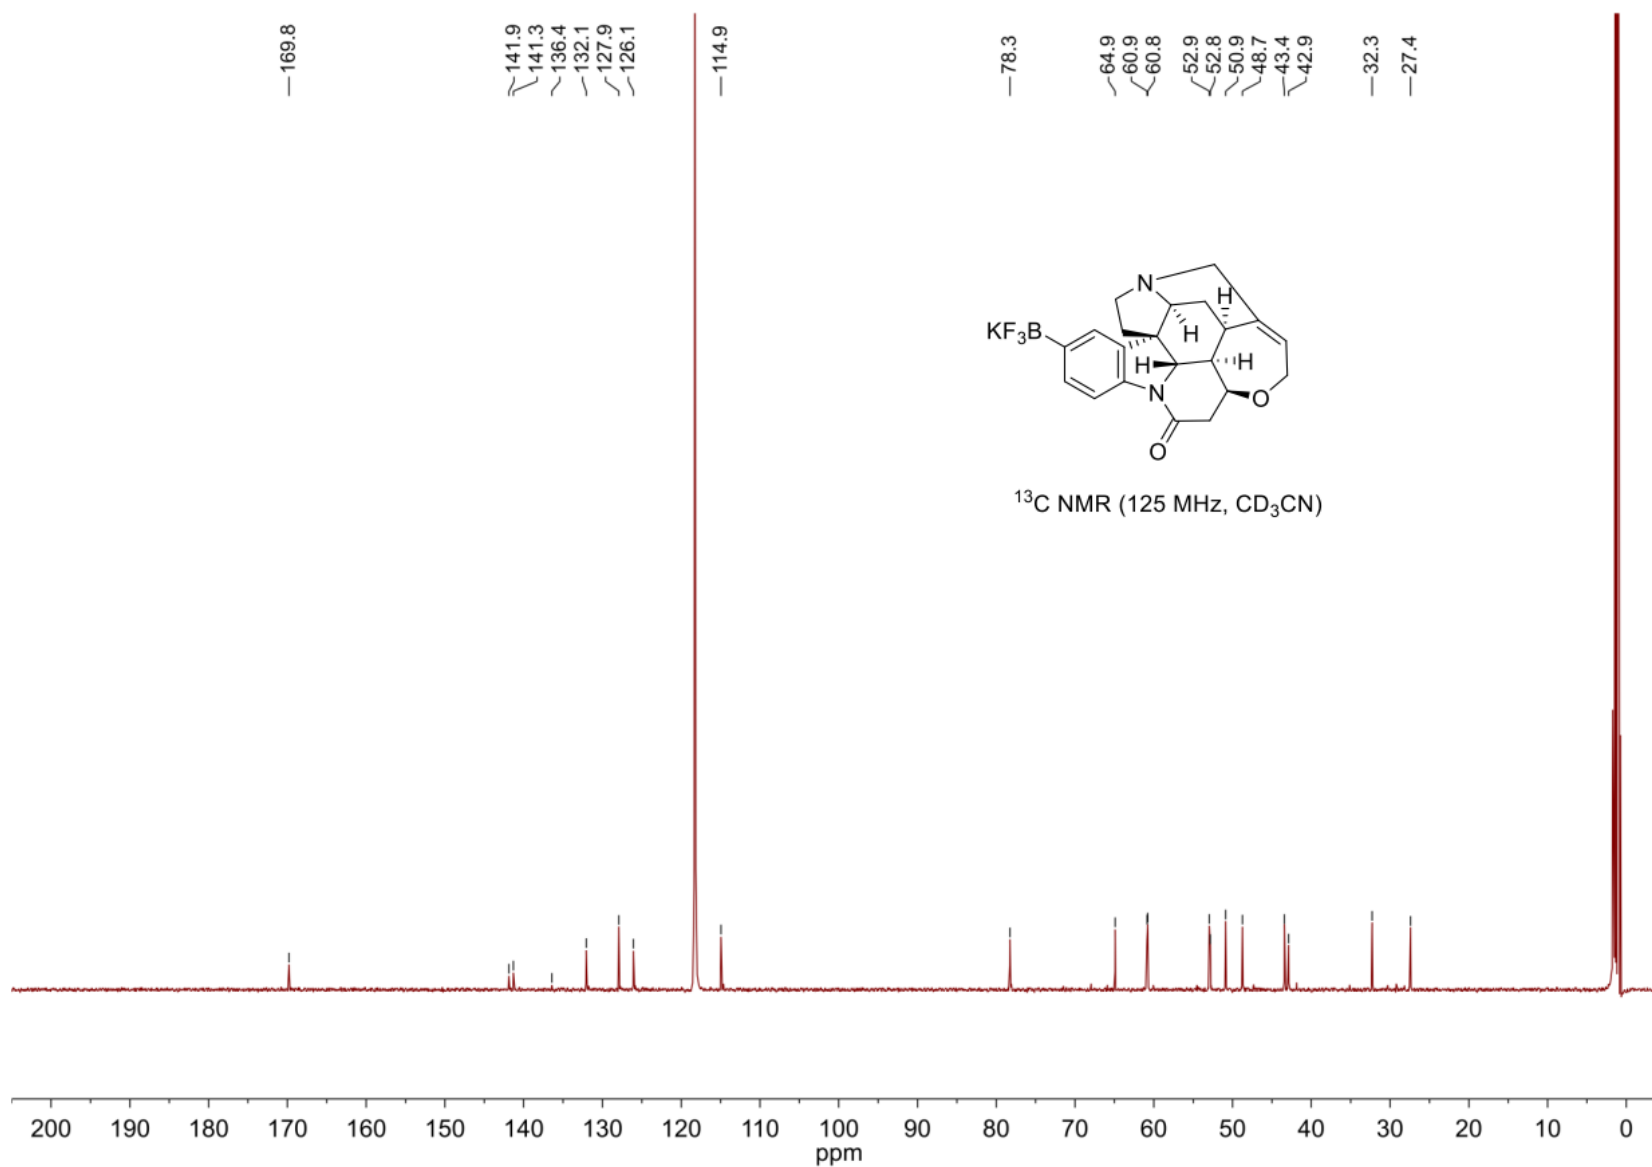

Methyl 2-((2*S*,3*R*)-2,7'-diethyl-2'-oxo-5'-(trifluoro-1*H*-boraneyl)-4,5-dihydro-2*H*-spiro[furan-3,3'-indolin]-2-yl)acetate, potassium salt  
(103)

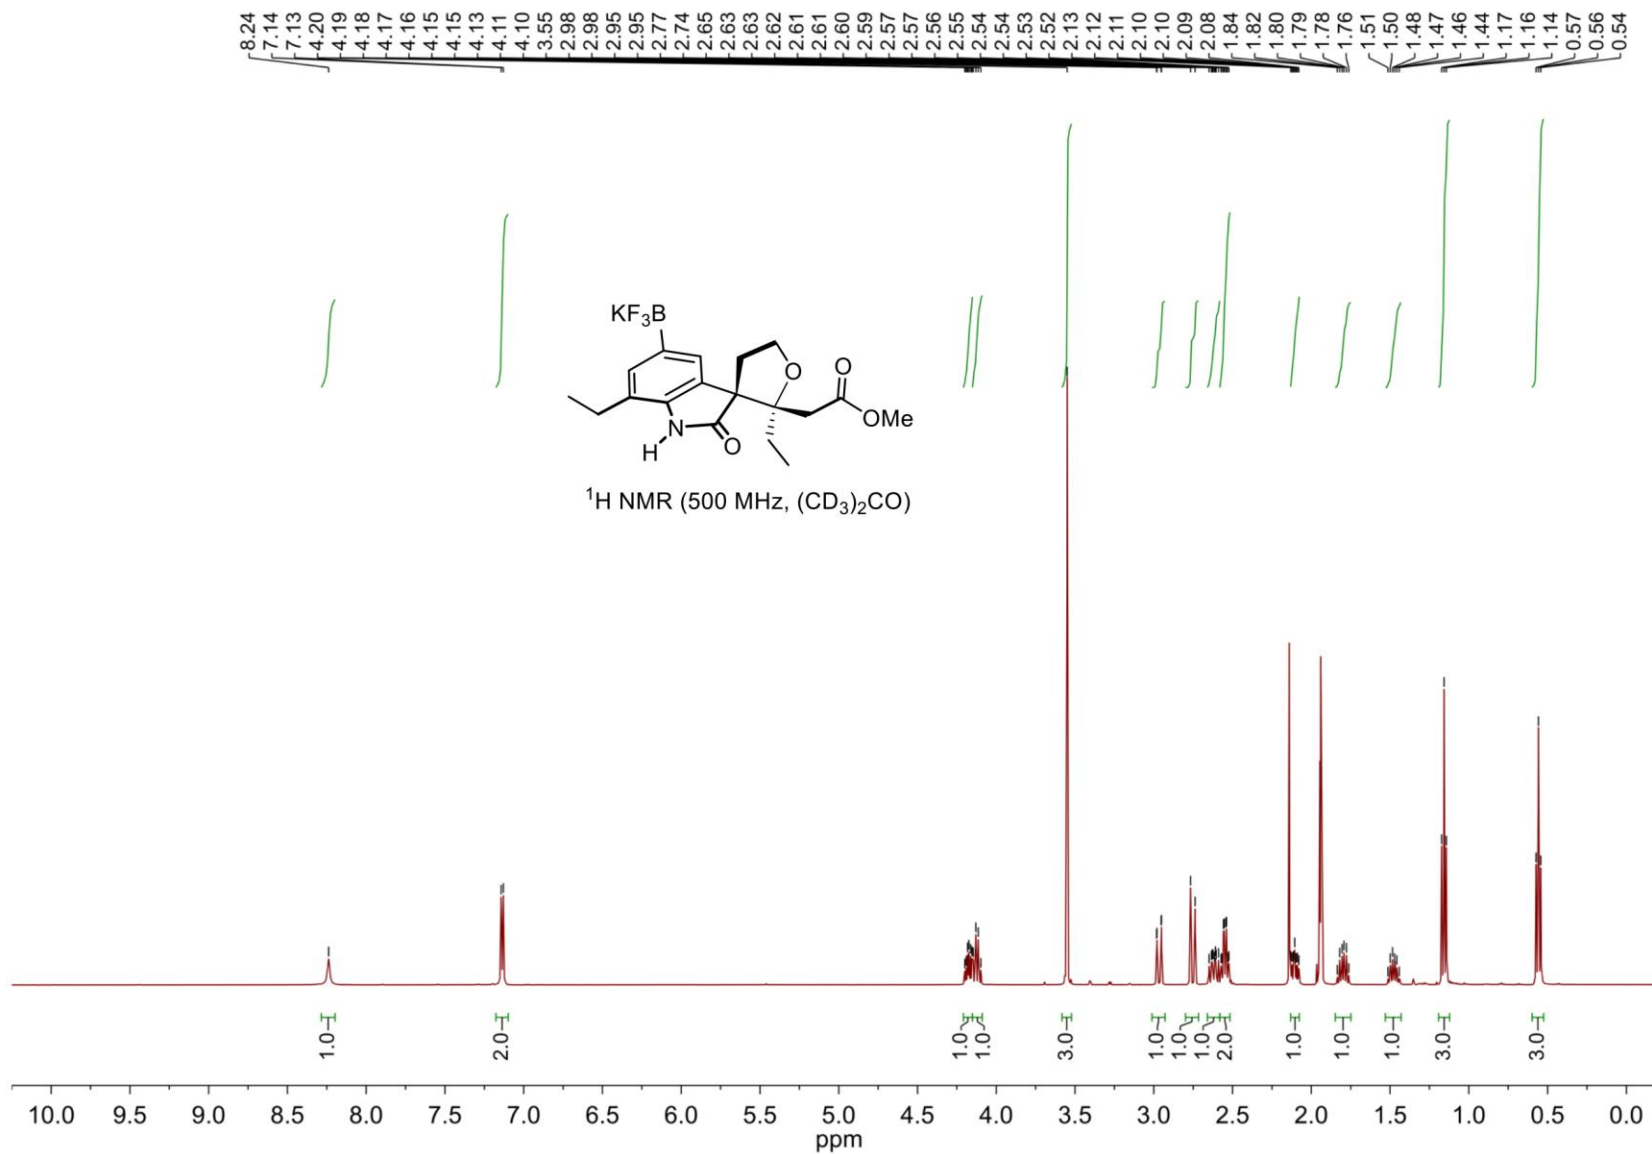

S479

Methyl 2-((2*S*,3*R*)-2,7'-diethyl-2'-oxo-5'-(trifluoro-1*H*-boraneyl)-4,5-dihydro-2*H*-spiro[furan-3,3'-indolin]-2-yl)acetate, potassium salt  
(103)

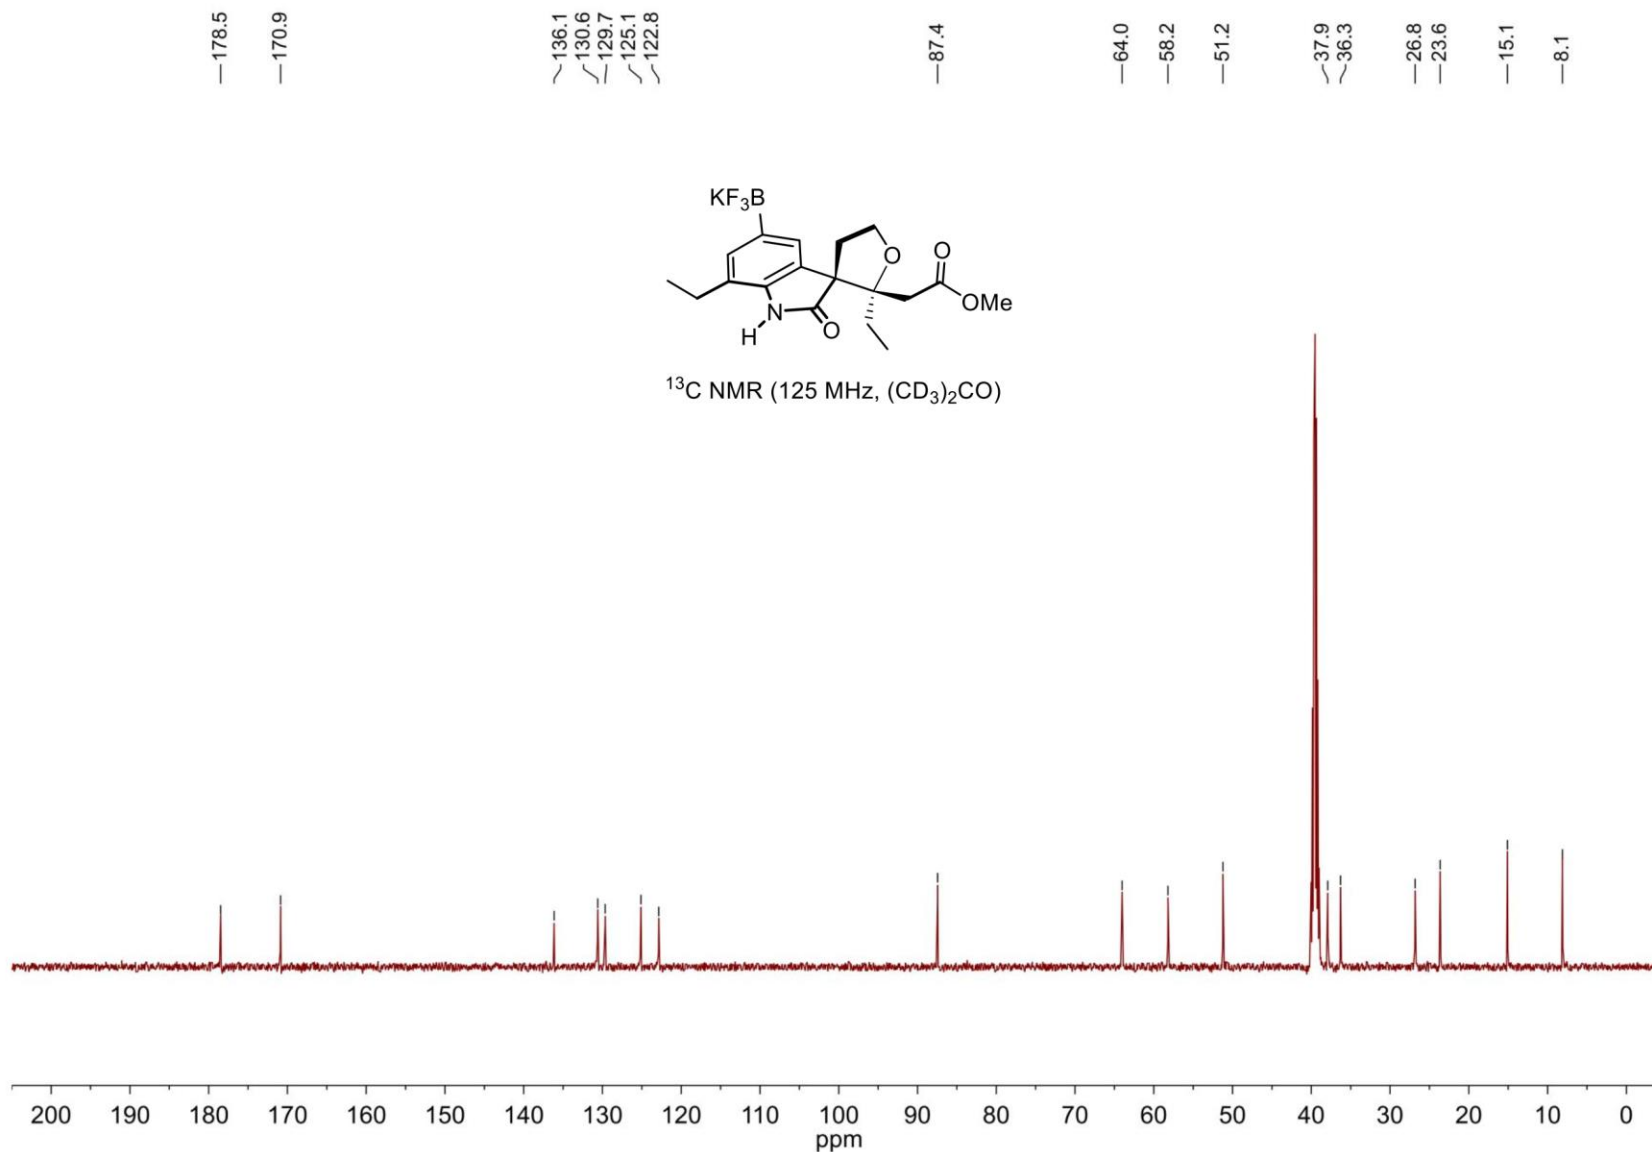

S480



1-(*N*-Isopropylacetamido)-3-((4-(trifluoro- $\lambda^4$ -boraneyl)naphthalen-1-yl)oxy)propan-2-yl acetate, potassium salt (104)

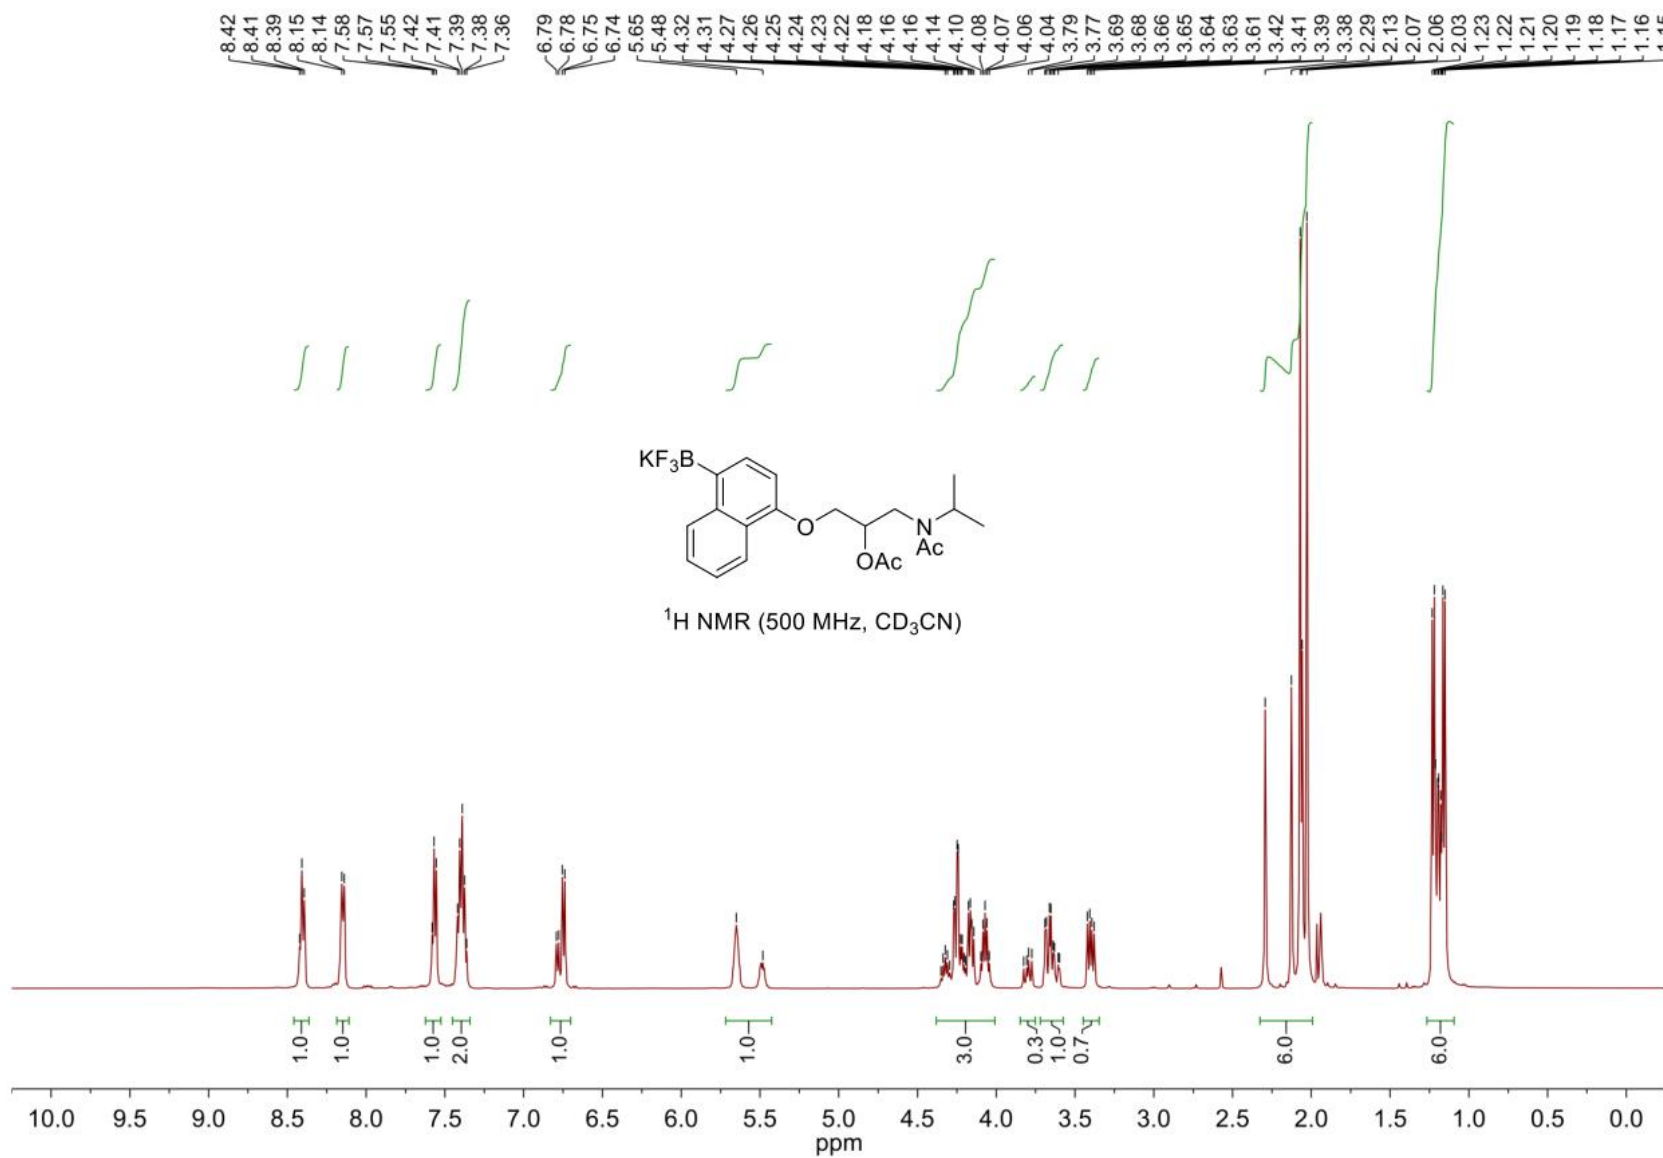

1-(*N*-Isopropylacetamido)-3-((4-(trifluoro- $\lambda^4$ -boraneyl)naphthalen-1-yl)oxy)propan-2-yl acetate, potassium salt (104)

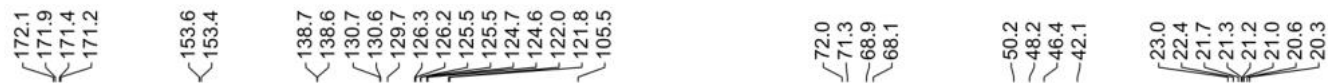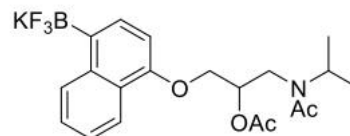

$^{13}\text{C}$  NMR (125 MHz,  $\text{CD}_3\text{CN}$ )

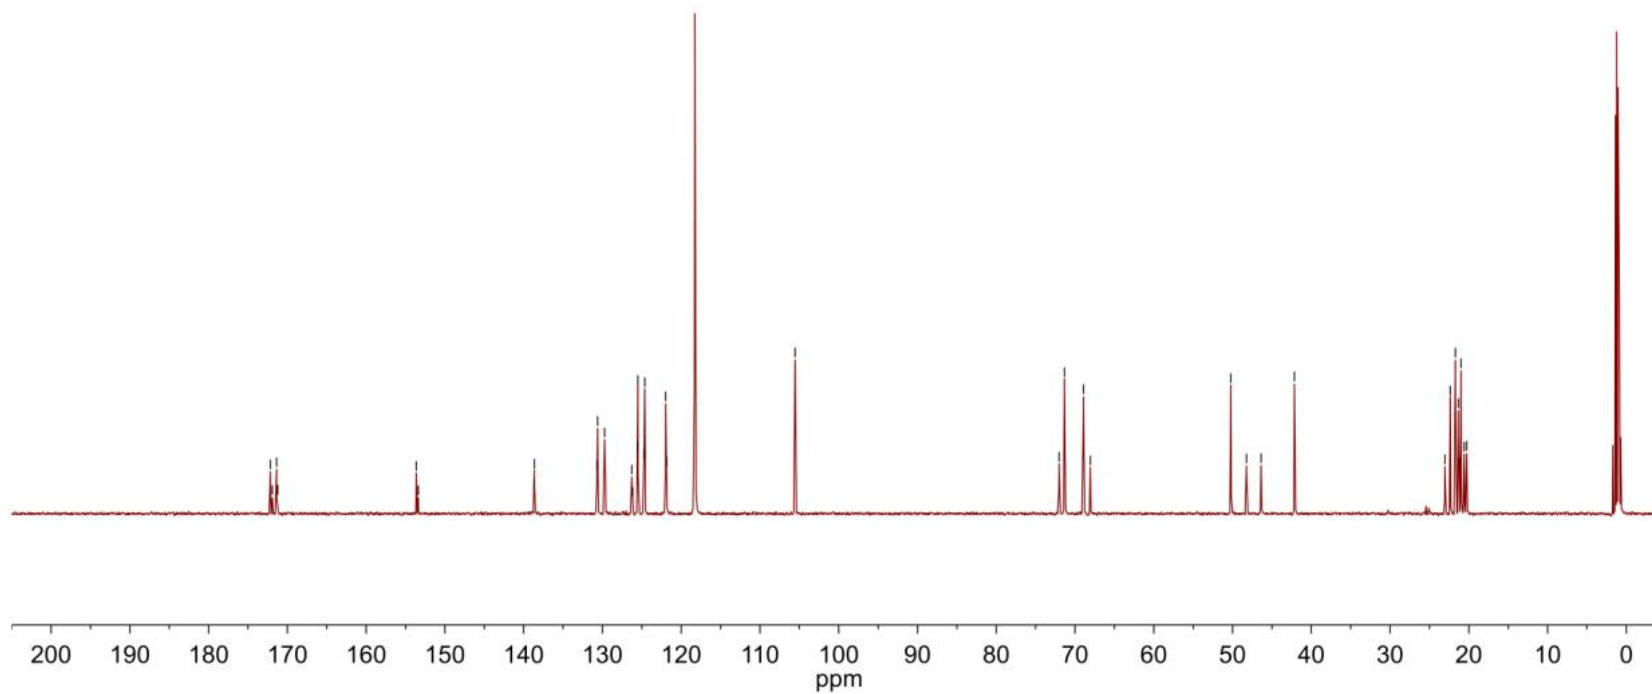

# Methyl 2-(4-isobutyl-2-(4,4,5,5-tetramethyl-1,3,2-dioxaborolan-2-yl)phenyl)propanoate (105)

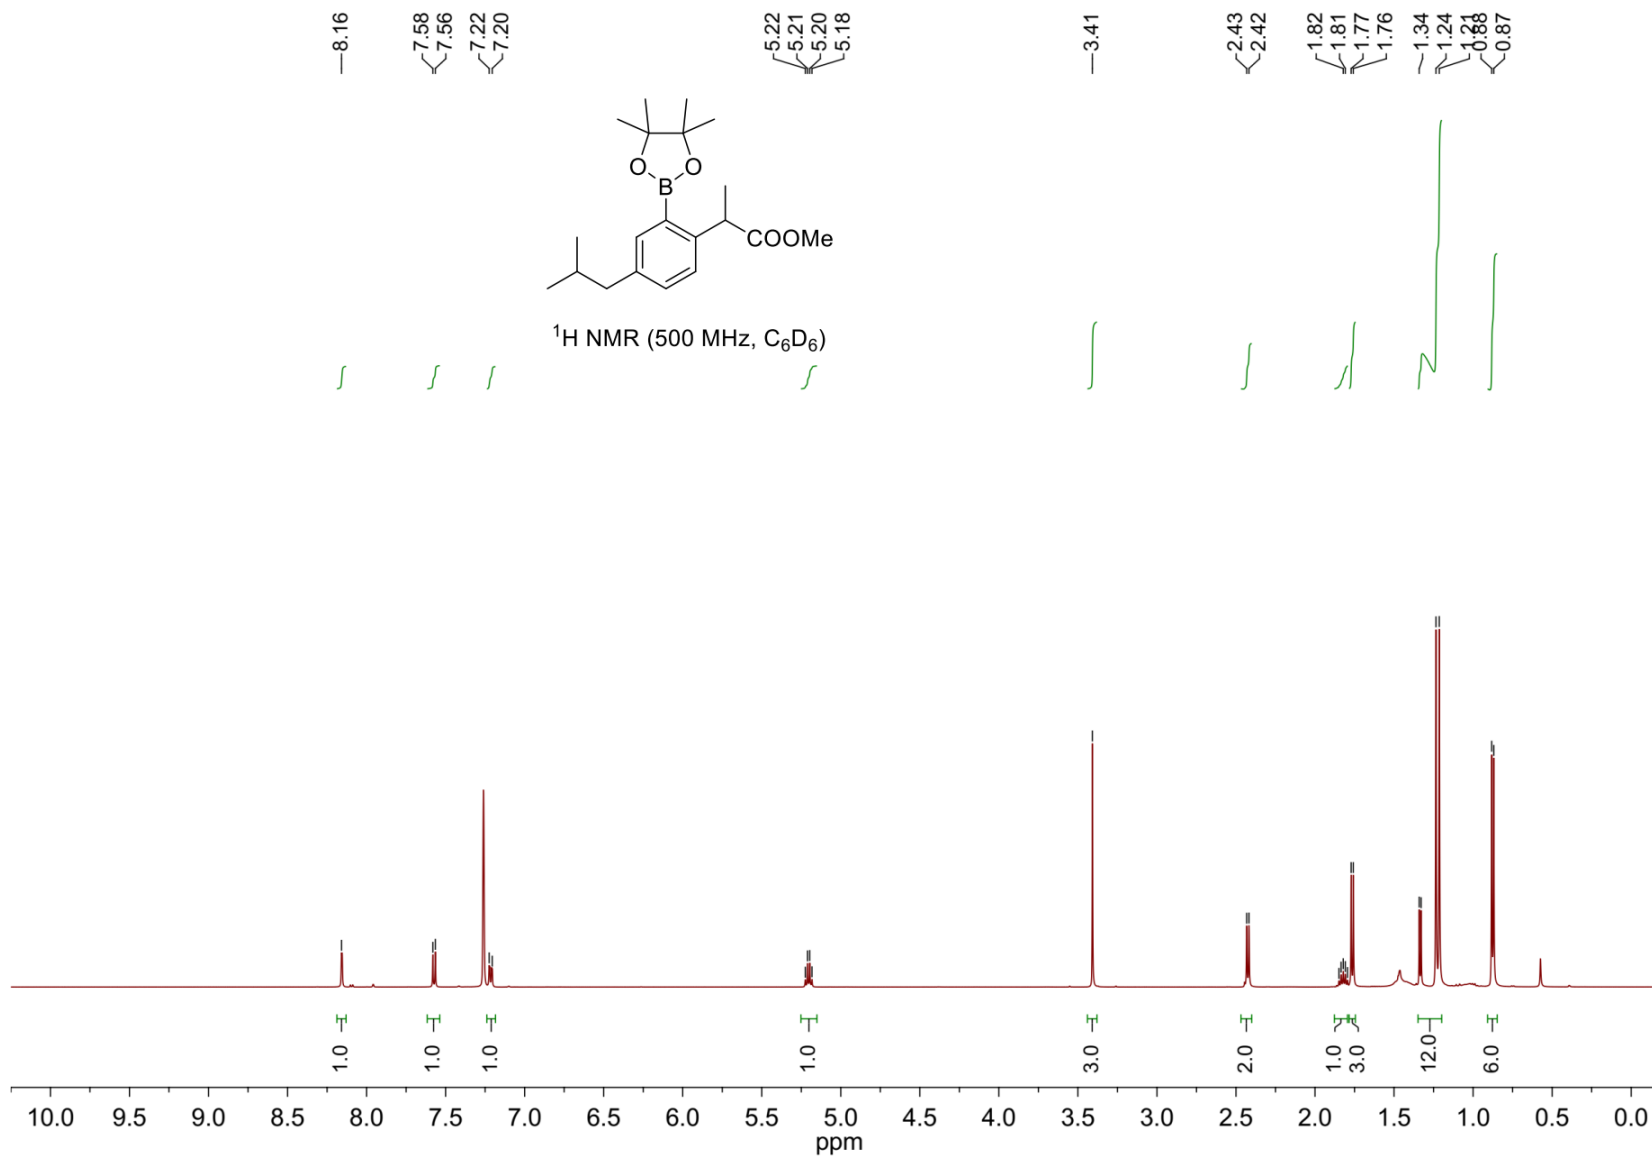

S483

# Methyl 2-(4-isobutyl-2-(4,4,5,5-tetramethyl-1,3,2-dioxaborolan-2-yl)phenyl)propanoate (105)

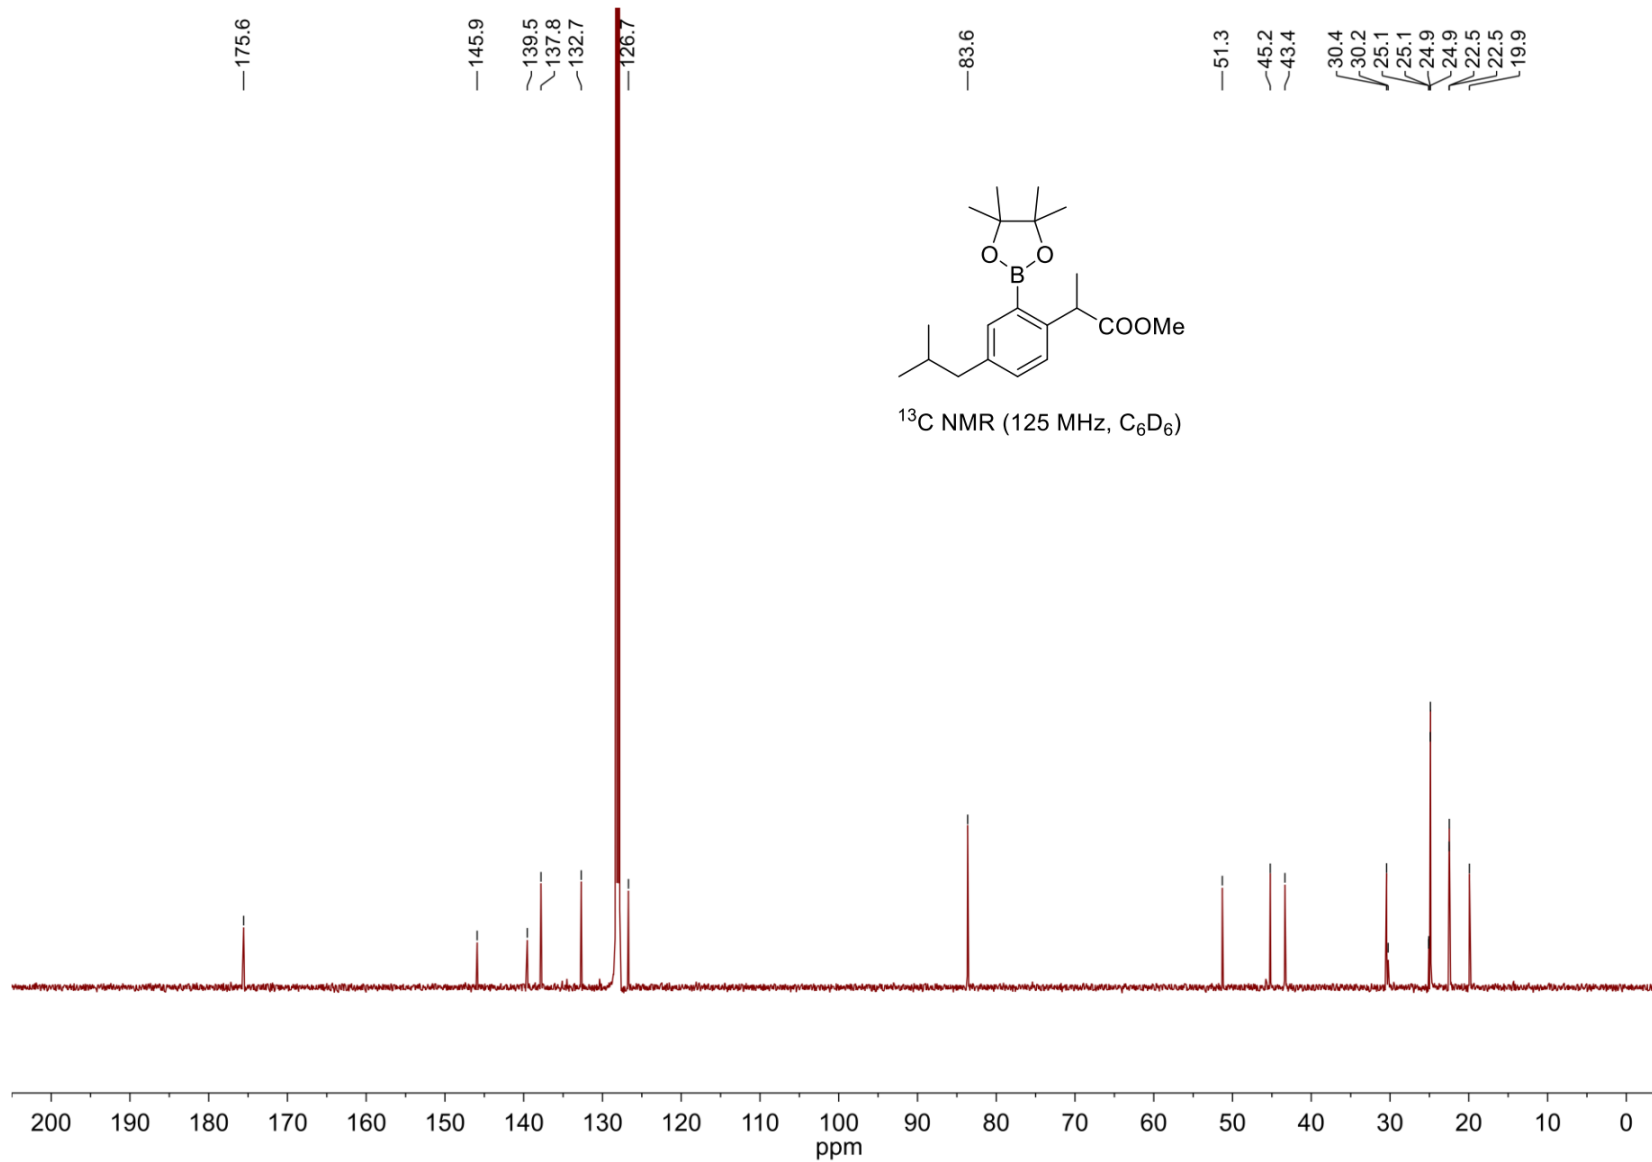

Methyl 5-(2,5-dimethyl-4-(4,4,5,5-tetramethyl-1,3,2-dioxaborolan-2-yl)phenoxy)-2,2-dimethylpentanoate (106)

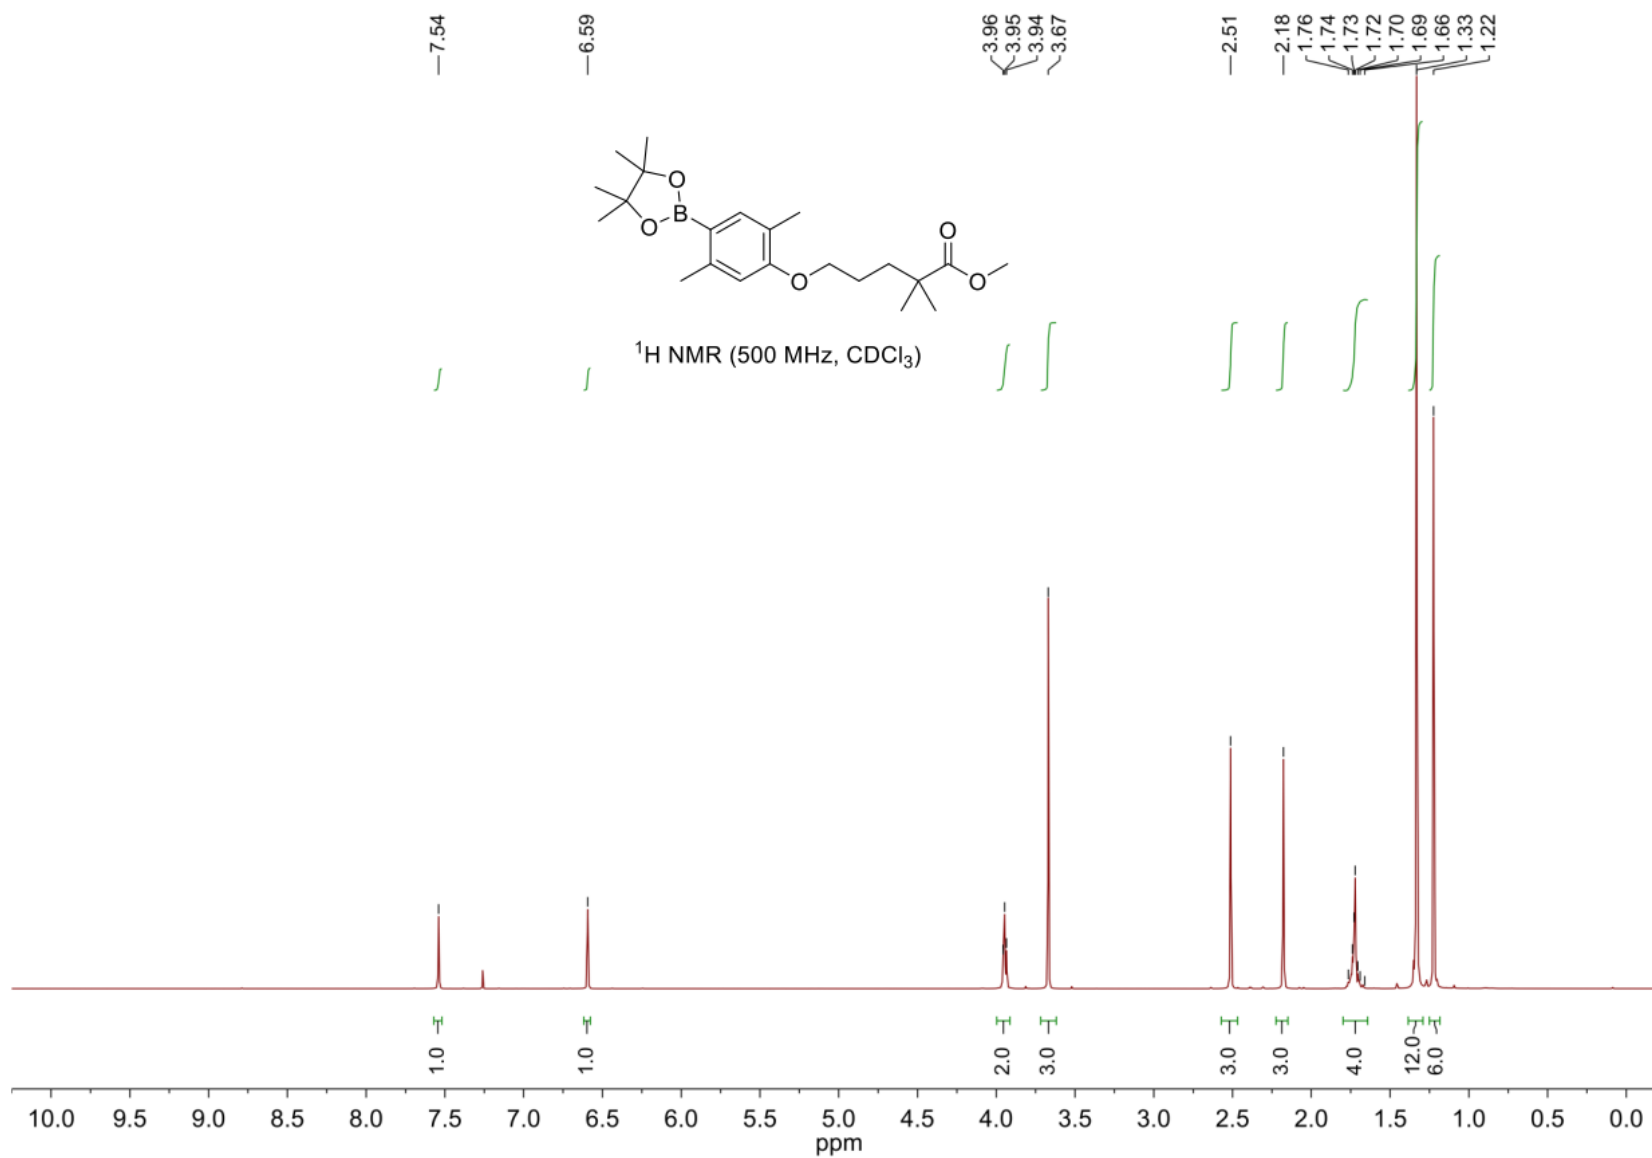

Methyl 5-(2,5-dimethyl-4-(4,4,5,5-tetramethyl-1,3,2-dioxaborolan-2-yl)phenoxy)-2,2-dimethylpentanoate (106)

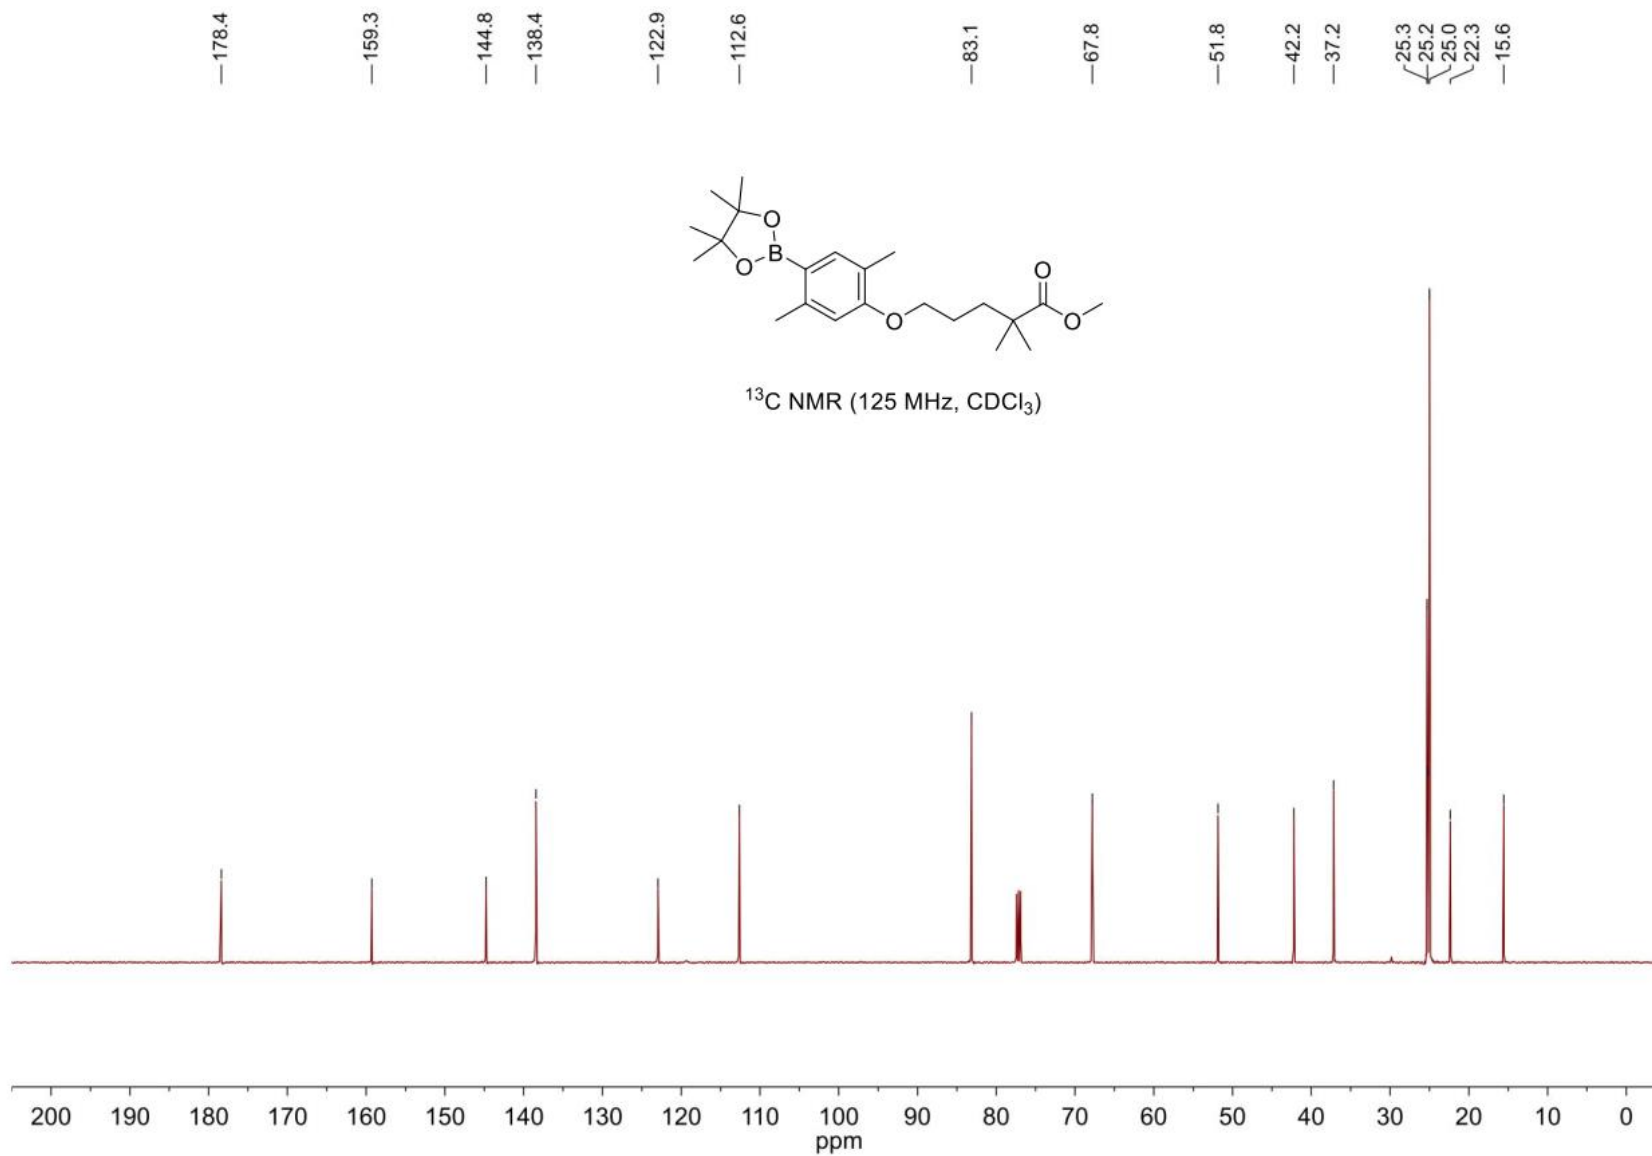

Methyl 4-(5-(trifluoro-*l*-boraneyl)nicotinamido)butanoate, potassium salt (107)

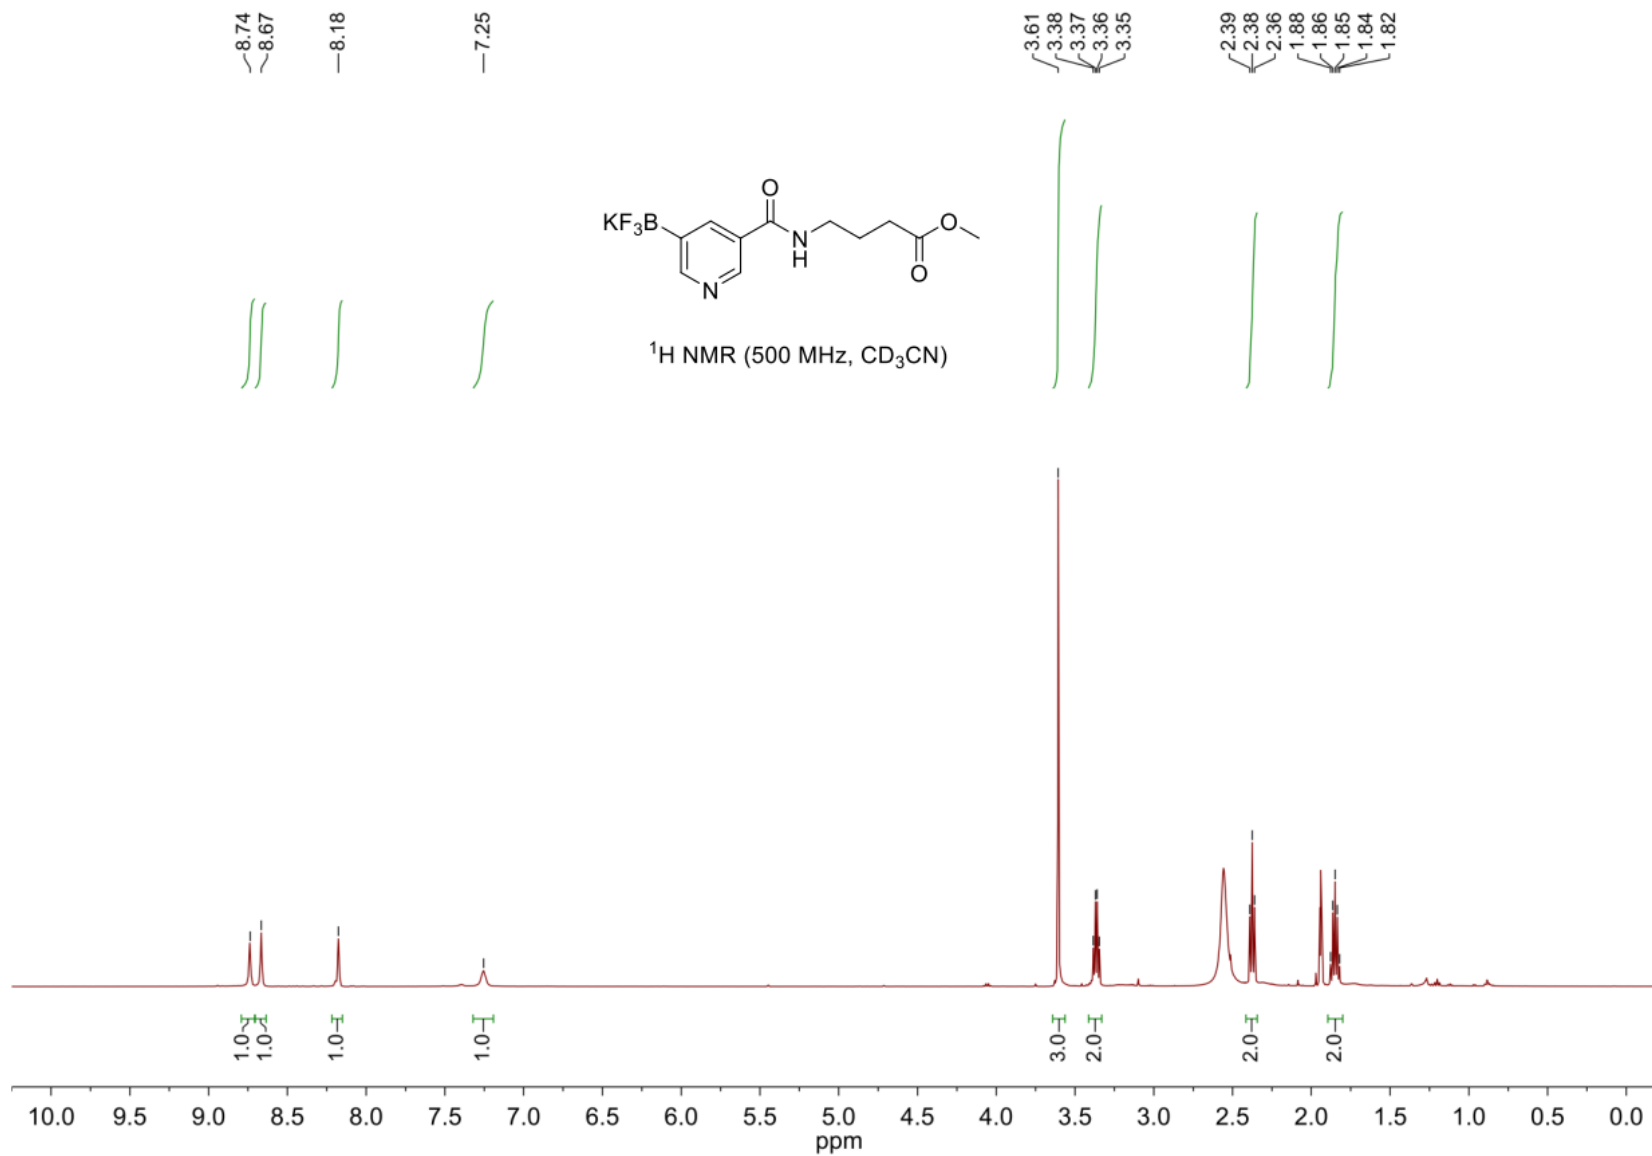

S487

# Methyl 4-(5-(trifluoro-*l*-boraneyl)nicotinamido)butanoate, potassium salt (107)

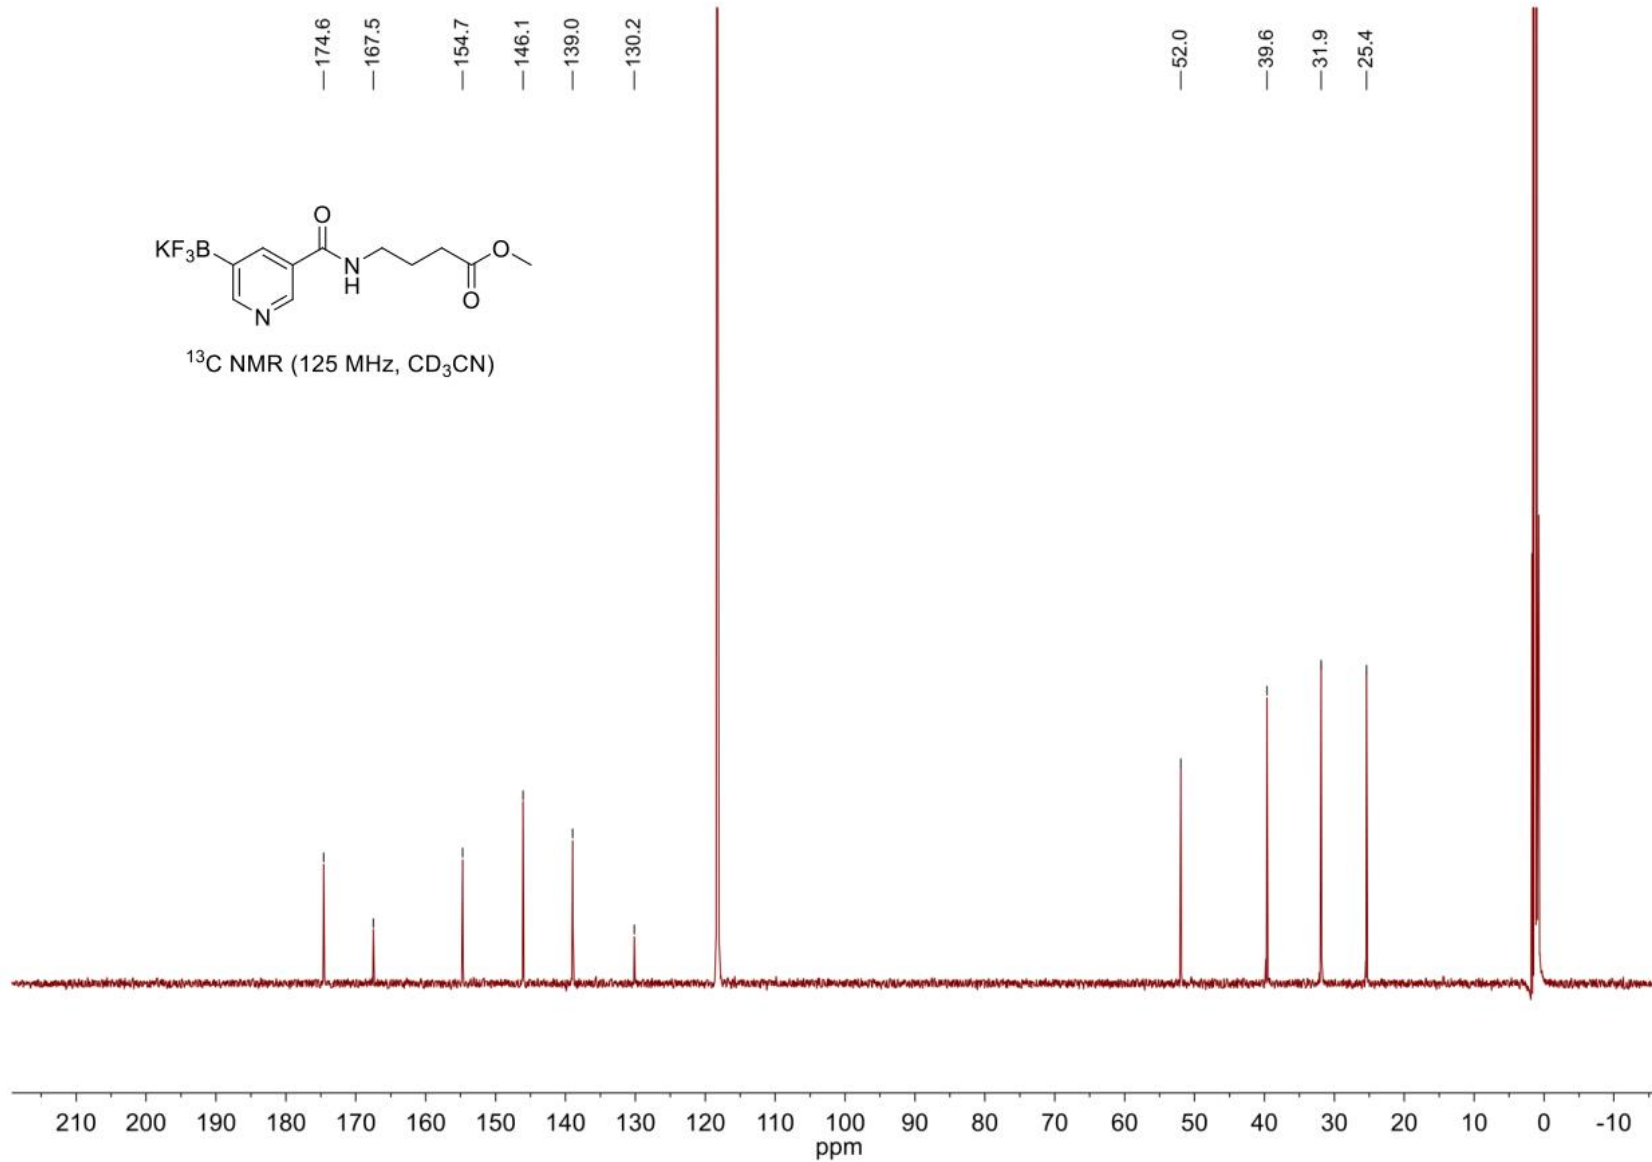



Methyl 2-(5-methoxy-2-methyl-1-(4-(4,4,5,5-tetramethyl-1,3,2-dioxaborolan-2-yl)benzoyl)-1H-indol-3-yl)acetate (108)

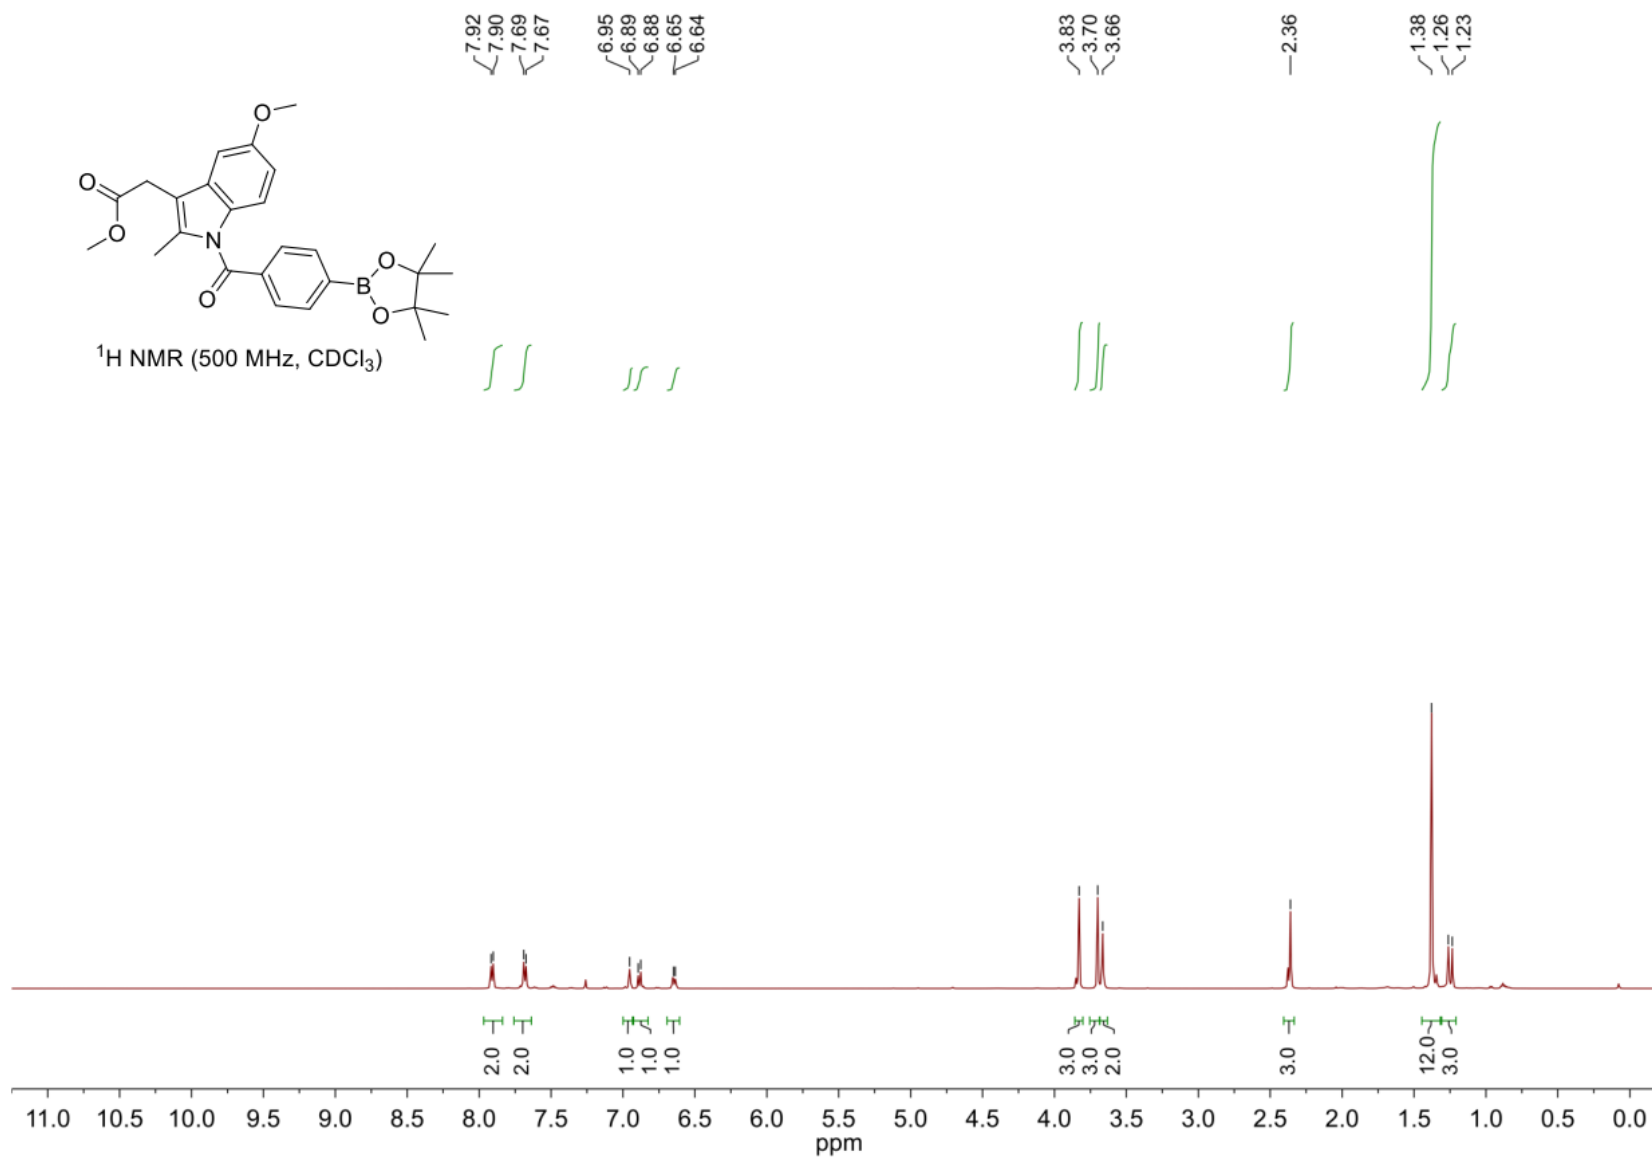

Methyl 2-(5-methoxy-2-methyl-1-(4-(4,4,5,5-tetramethyl-1,3,2-dioxaborolan-2-yl)benzoyl)-1H-indol-3-yl)acetate (108)

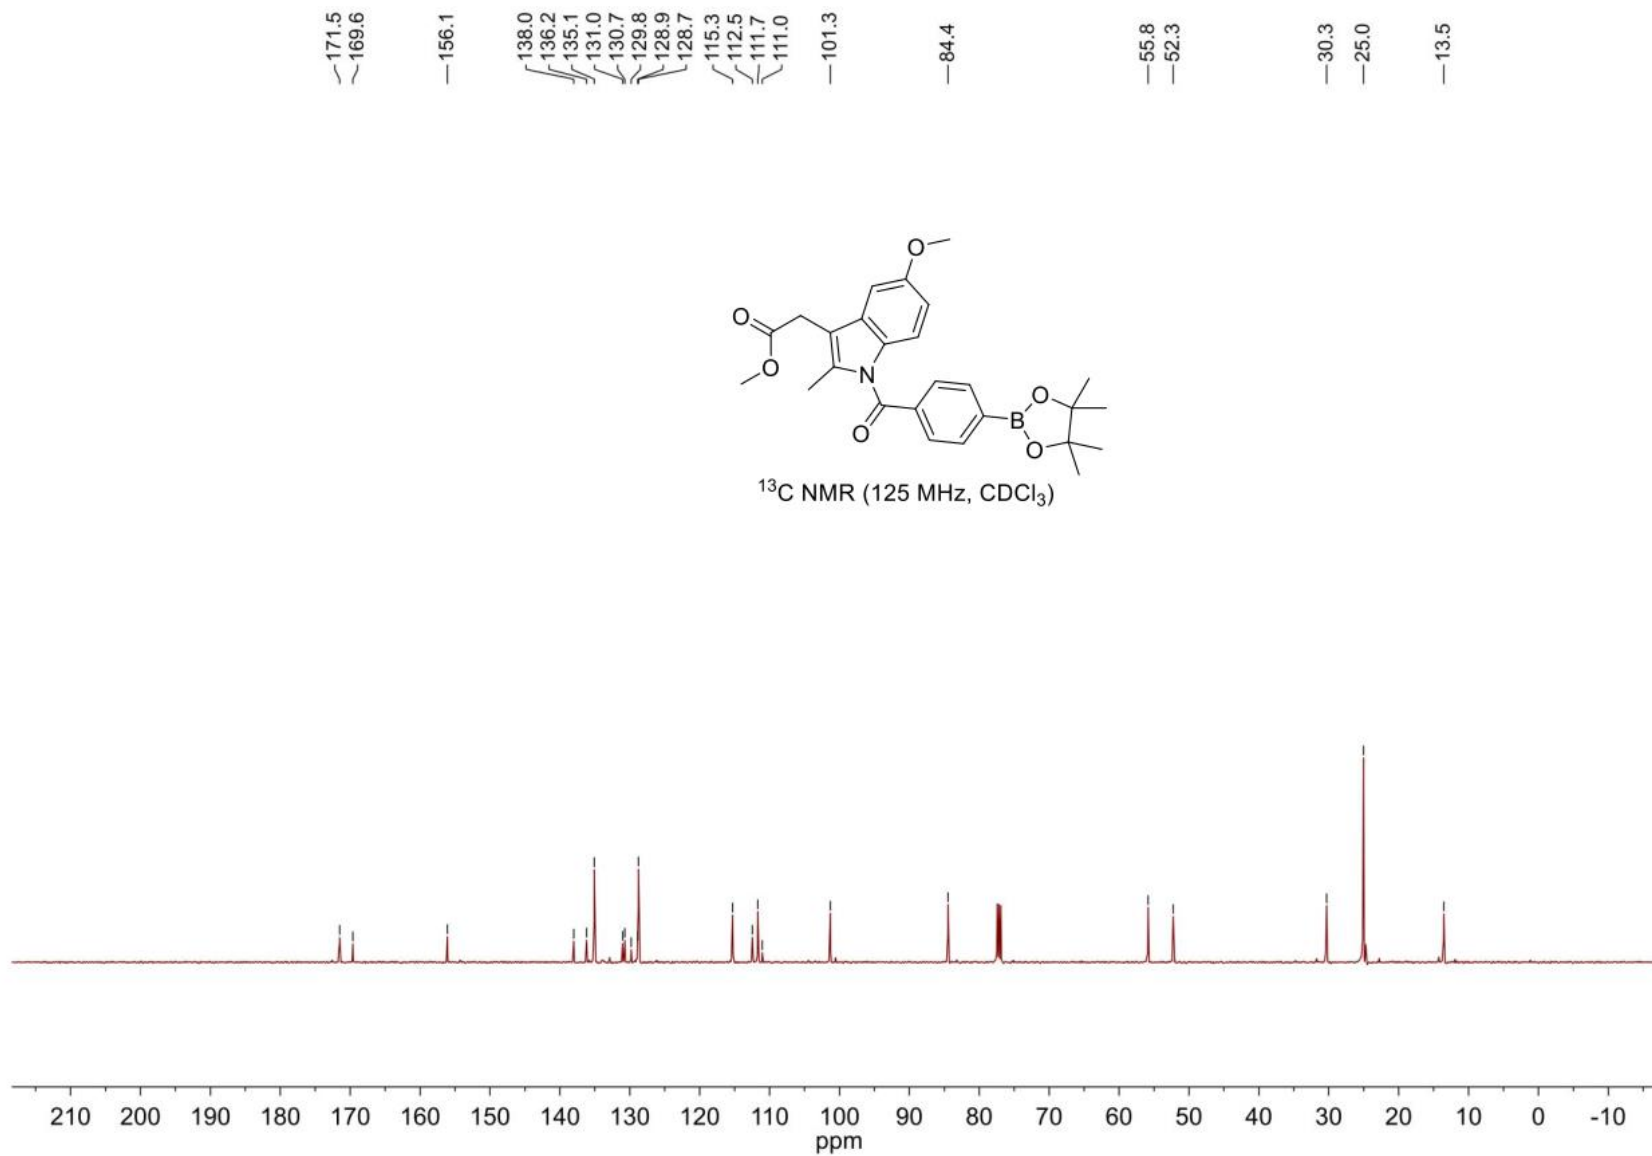

Ethyl 4-(8-(trifluoro- $\lambda^4$ -boraneyl)-5,6-dihydro-11H-benzo[5,6]cyclohepta[1,2-b]pyridin-11-ylidene)piperidine-1-carboxylate, potassium salt (109)

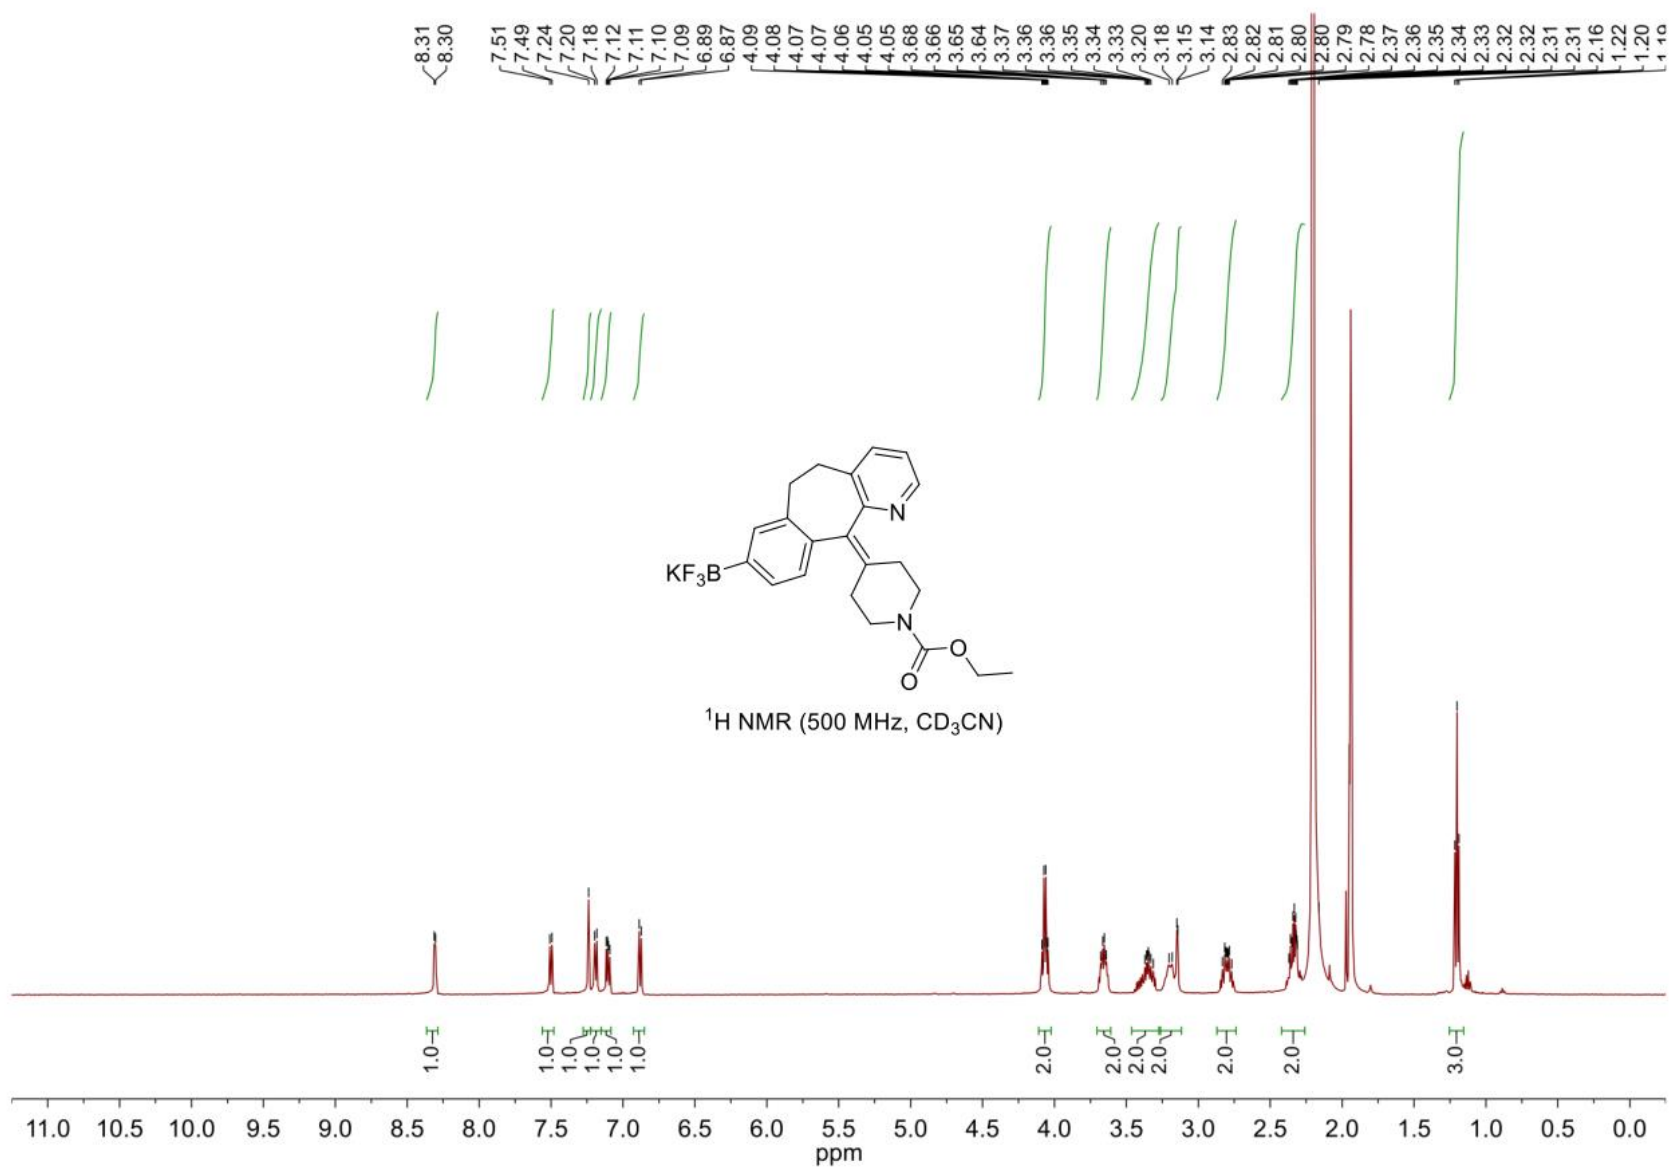

S491

Ethyl 4-(8-(trifluoro- $\lambda^4$ -boraneyl)-5,6-dihydro-11H-benzo[5,6]cyclohepta[1,2-b]pyridin-11-ylidene)piperidine-1-carboxylate, potassium salt (109)

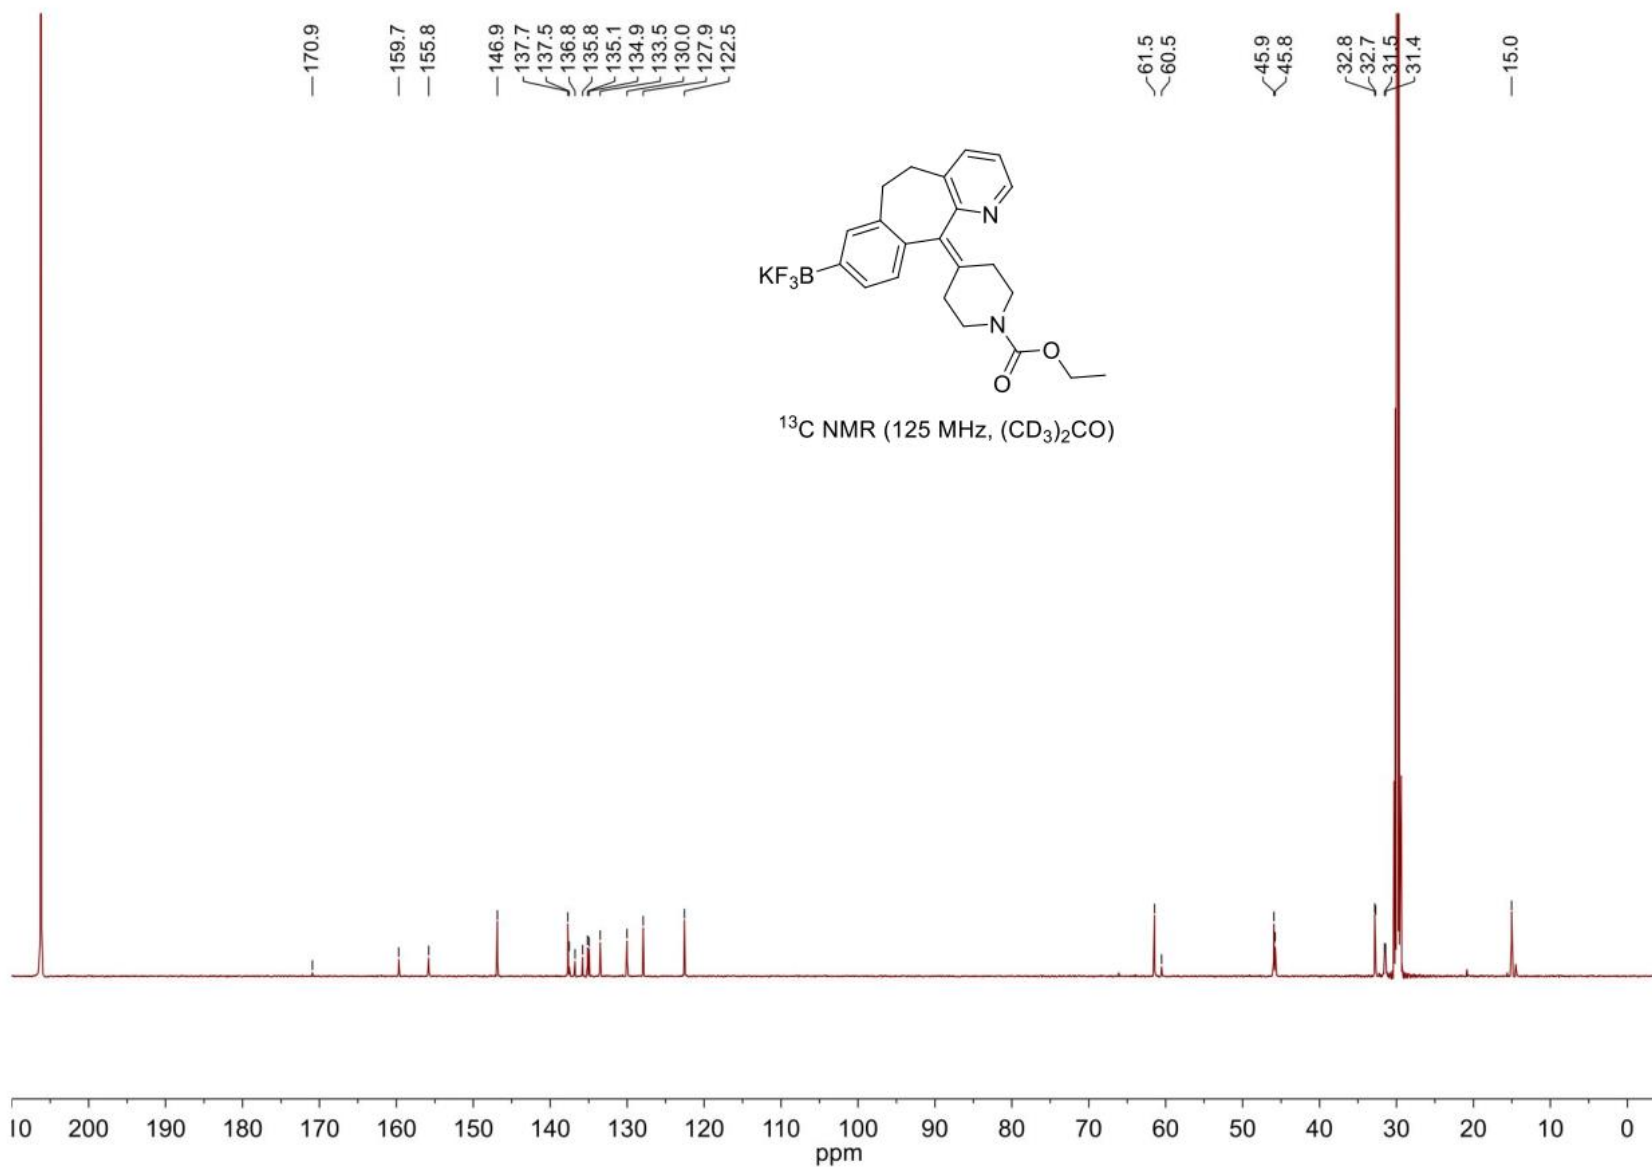

(8*R*,9*S*,13*S*,14*S*)-13-Methyl-17-oxo-7,8,9,11,12,13,14,15,16,17-decahydro-6*H*-cyclopenta[*a*]phenanthren-3-yl 4-(4,4,5,5-tetramethyl-1,3,2-dioxaborolan-2-yl)benzoate (110)

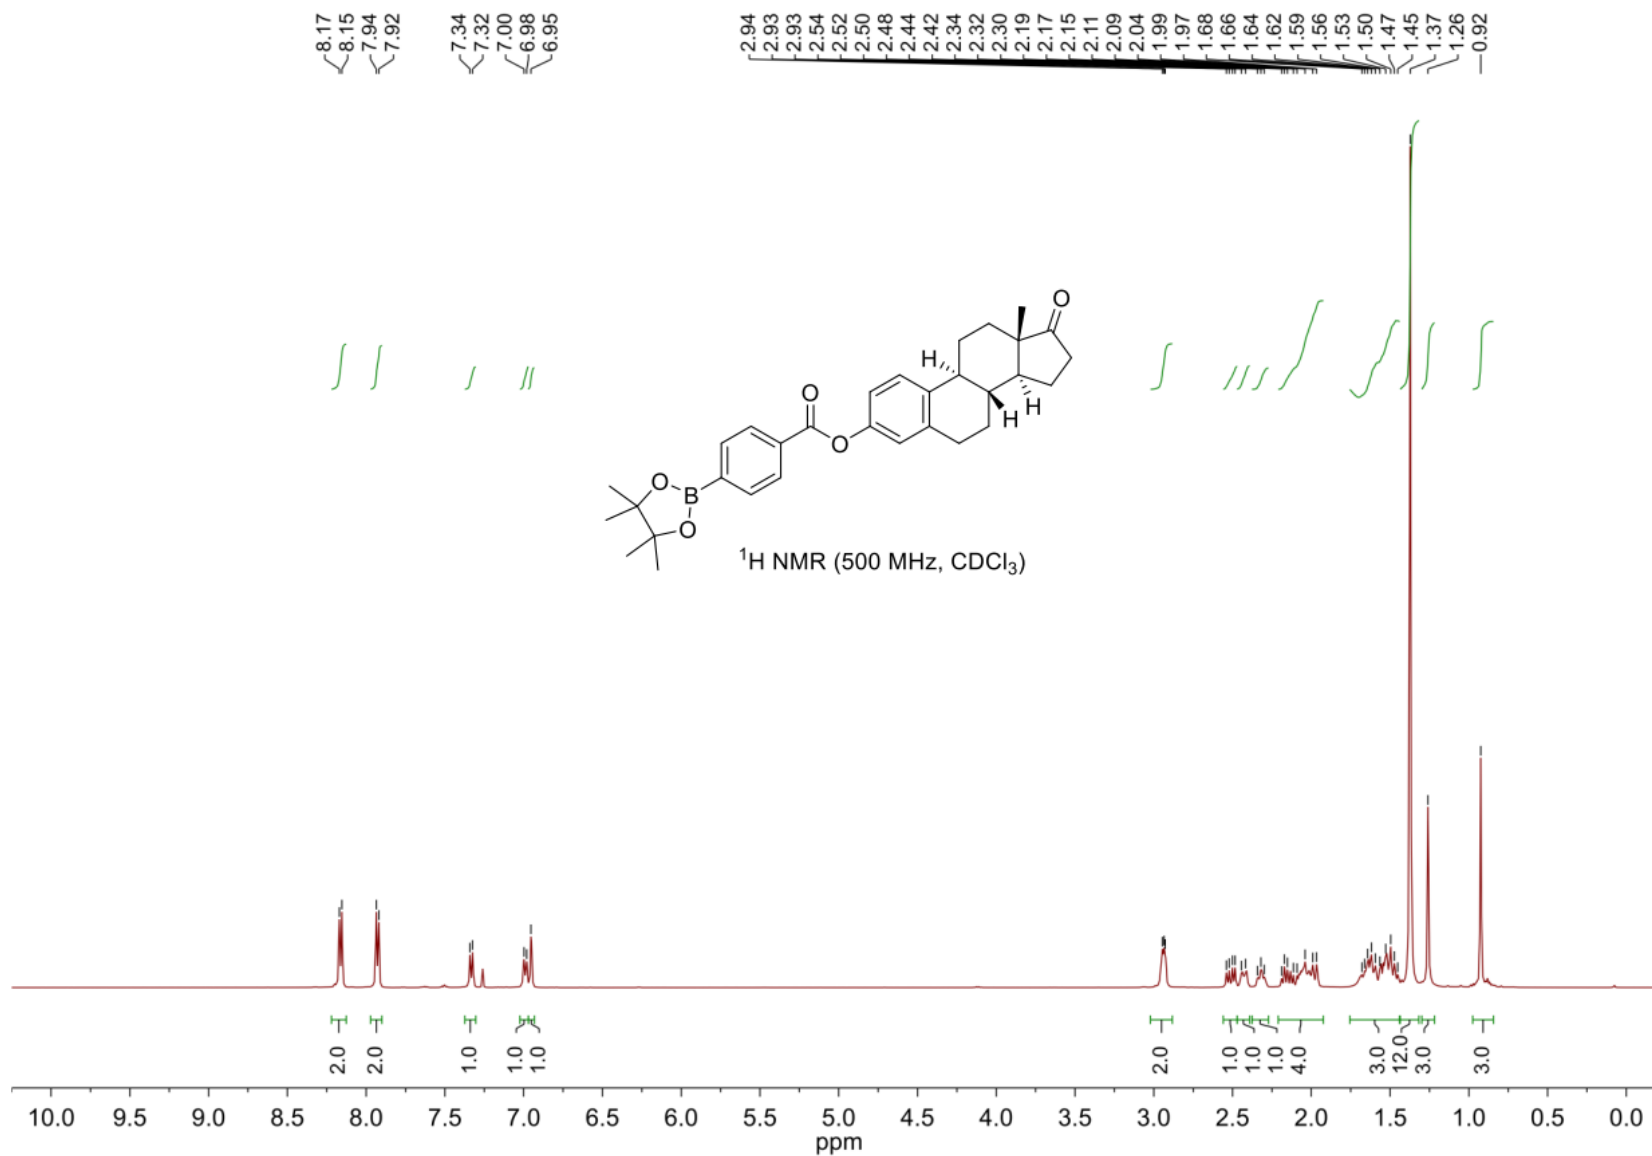

S493

**(8*R*,9*S*,13*S*,14*S*)-13-Methyl-17-oxo-7,8,9,11,12,13,14,15,16,17-decahydro-6*H*-cyclopenta[*a*]phenanthren-3-yl 4-(4,4,5,5-tetramethyl-1,3,2-dioxaborolan-2-yl)benzoate (110)**

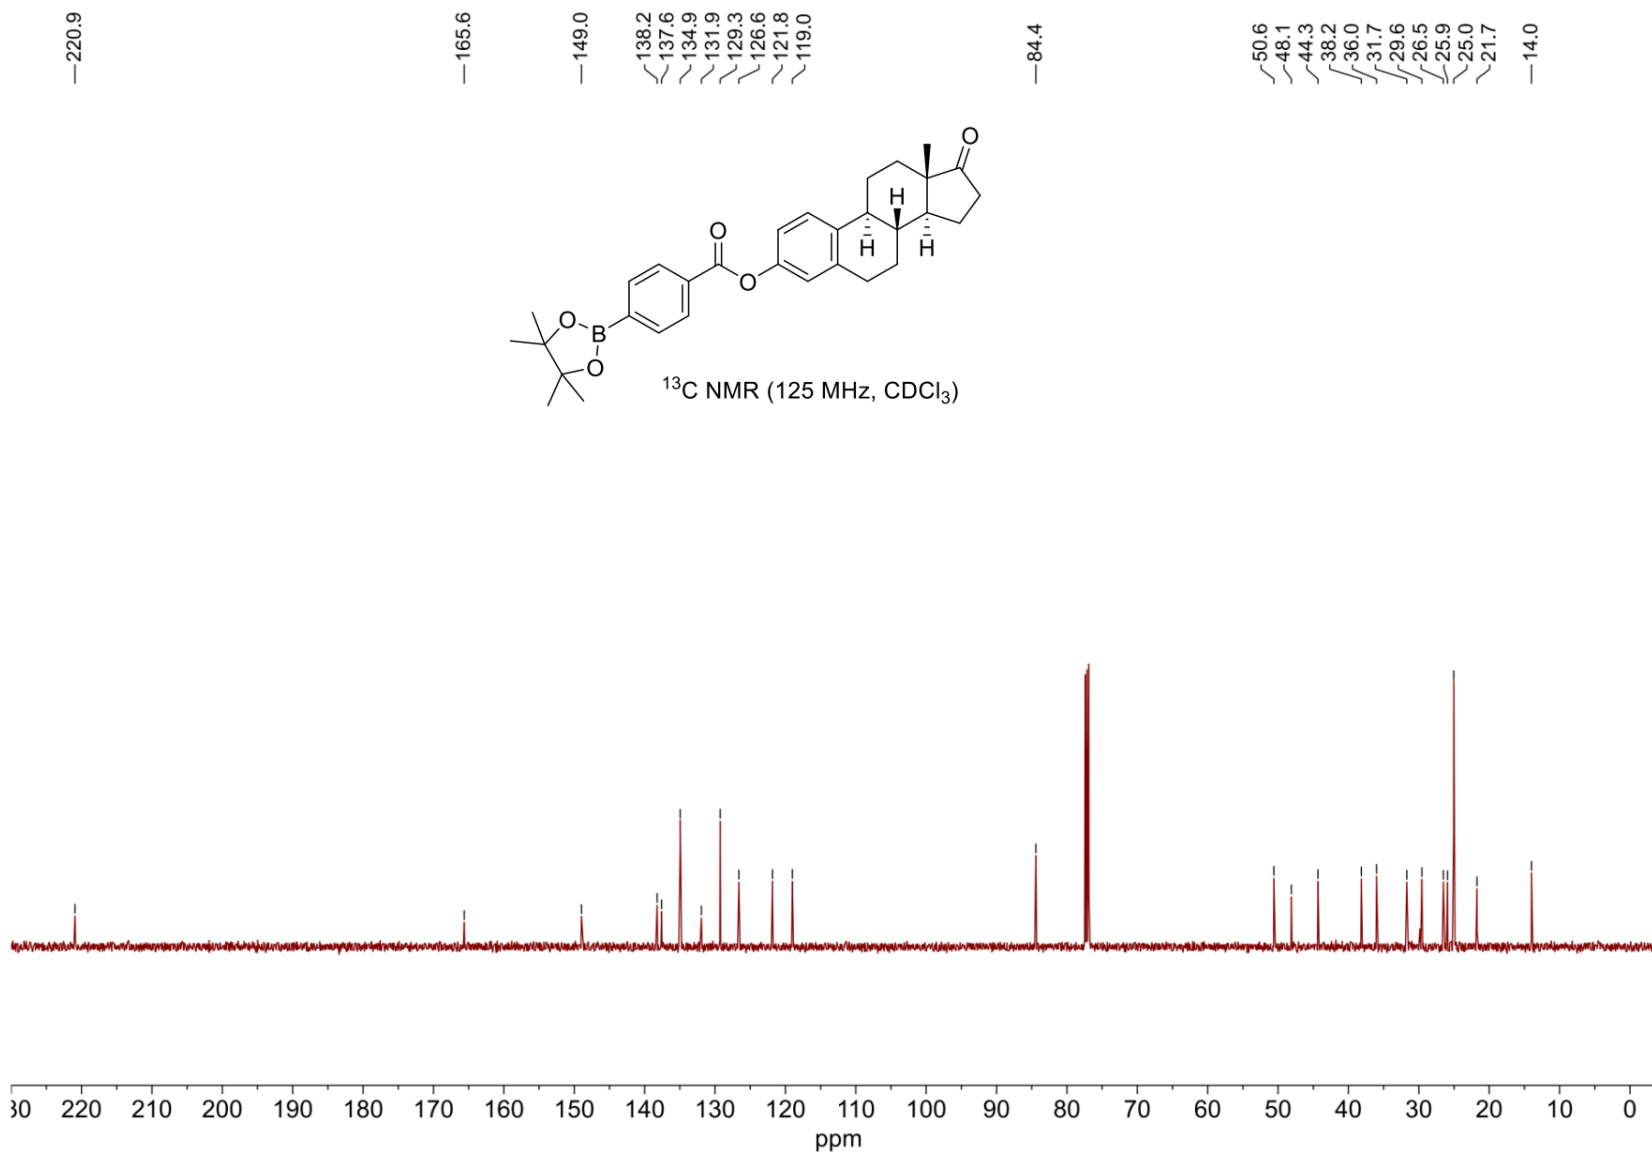

S494

1,3-Bis(4,4,5,5-tetramethyl-1,3,2-dioxaborolan-2-yl)benzene (111)

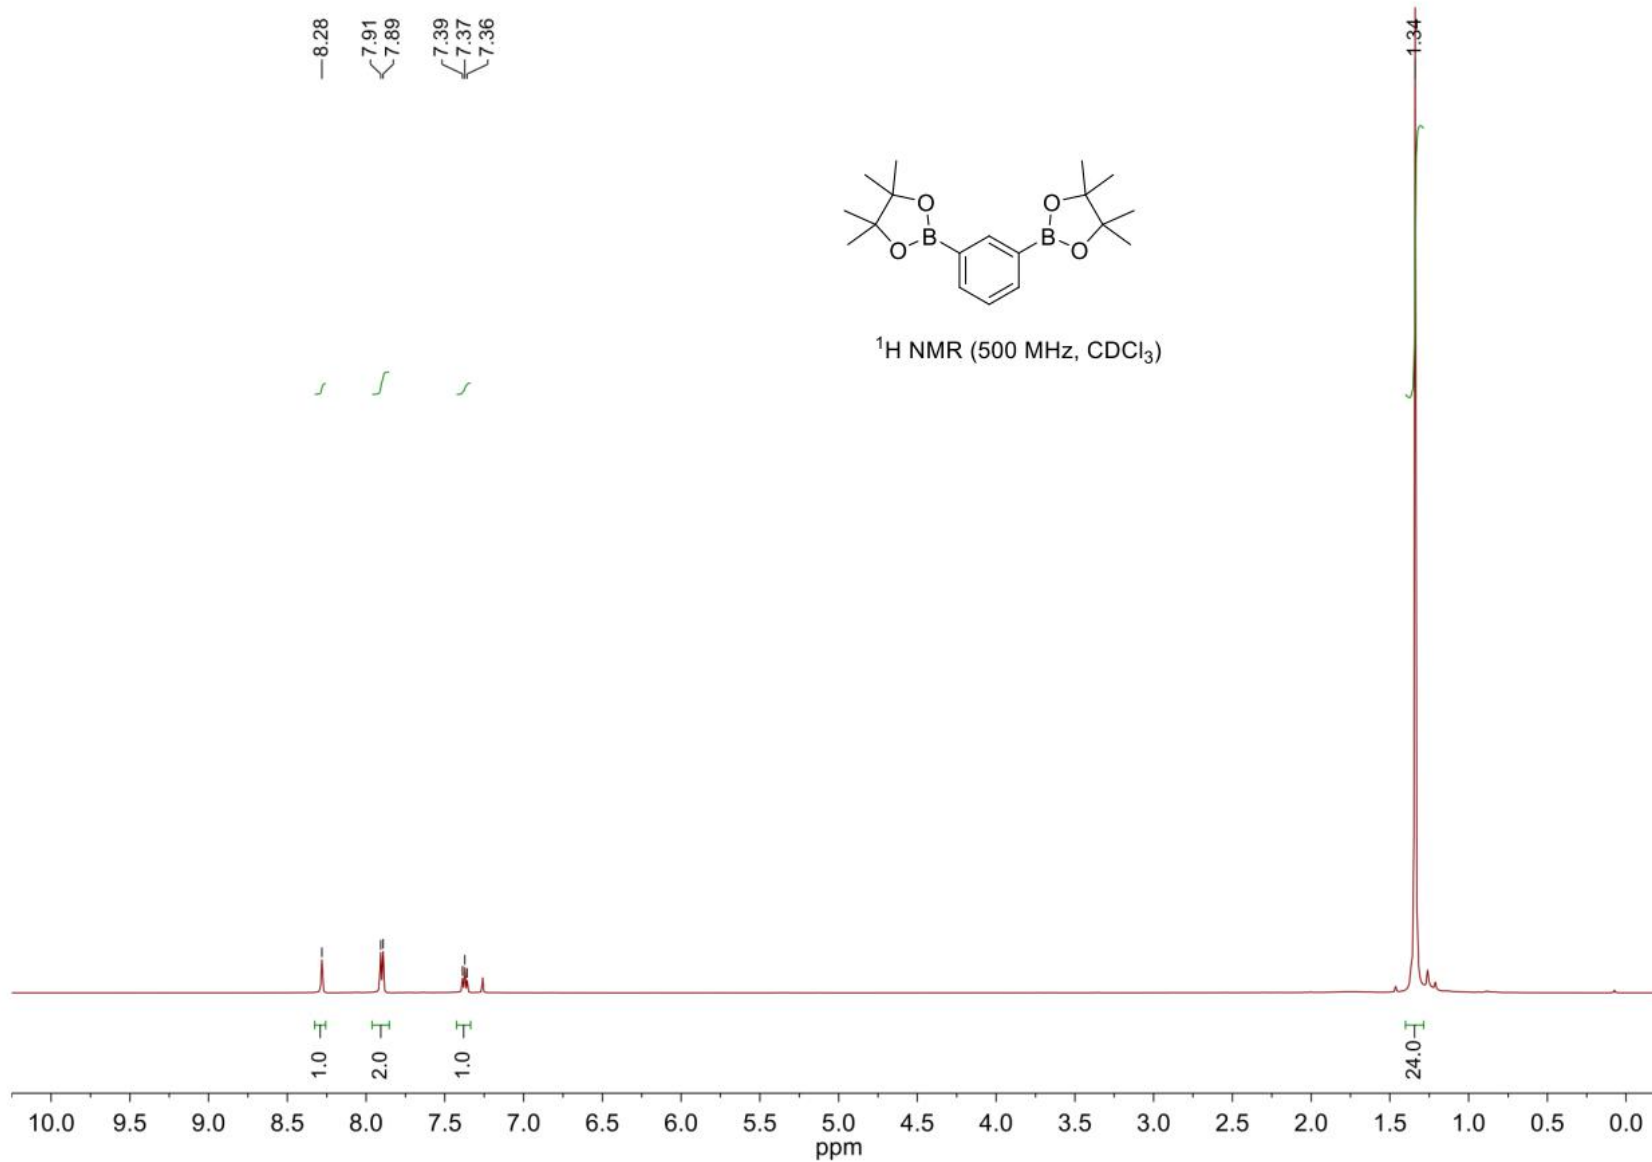

S495

# 1,3-Bis(4,4,5,5-tetramethyl-1,3,2-dioxaborolan-2-yl)benzene (111)

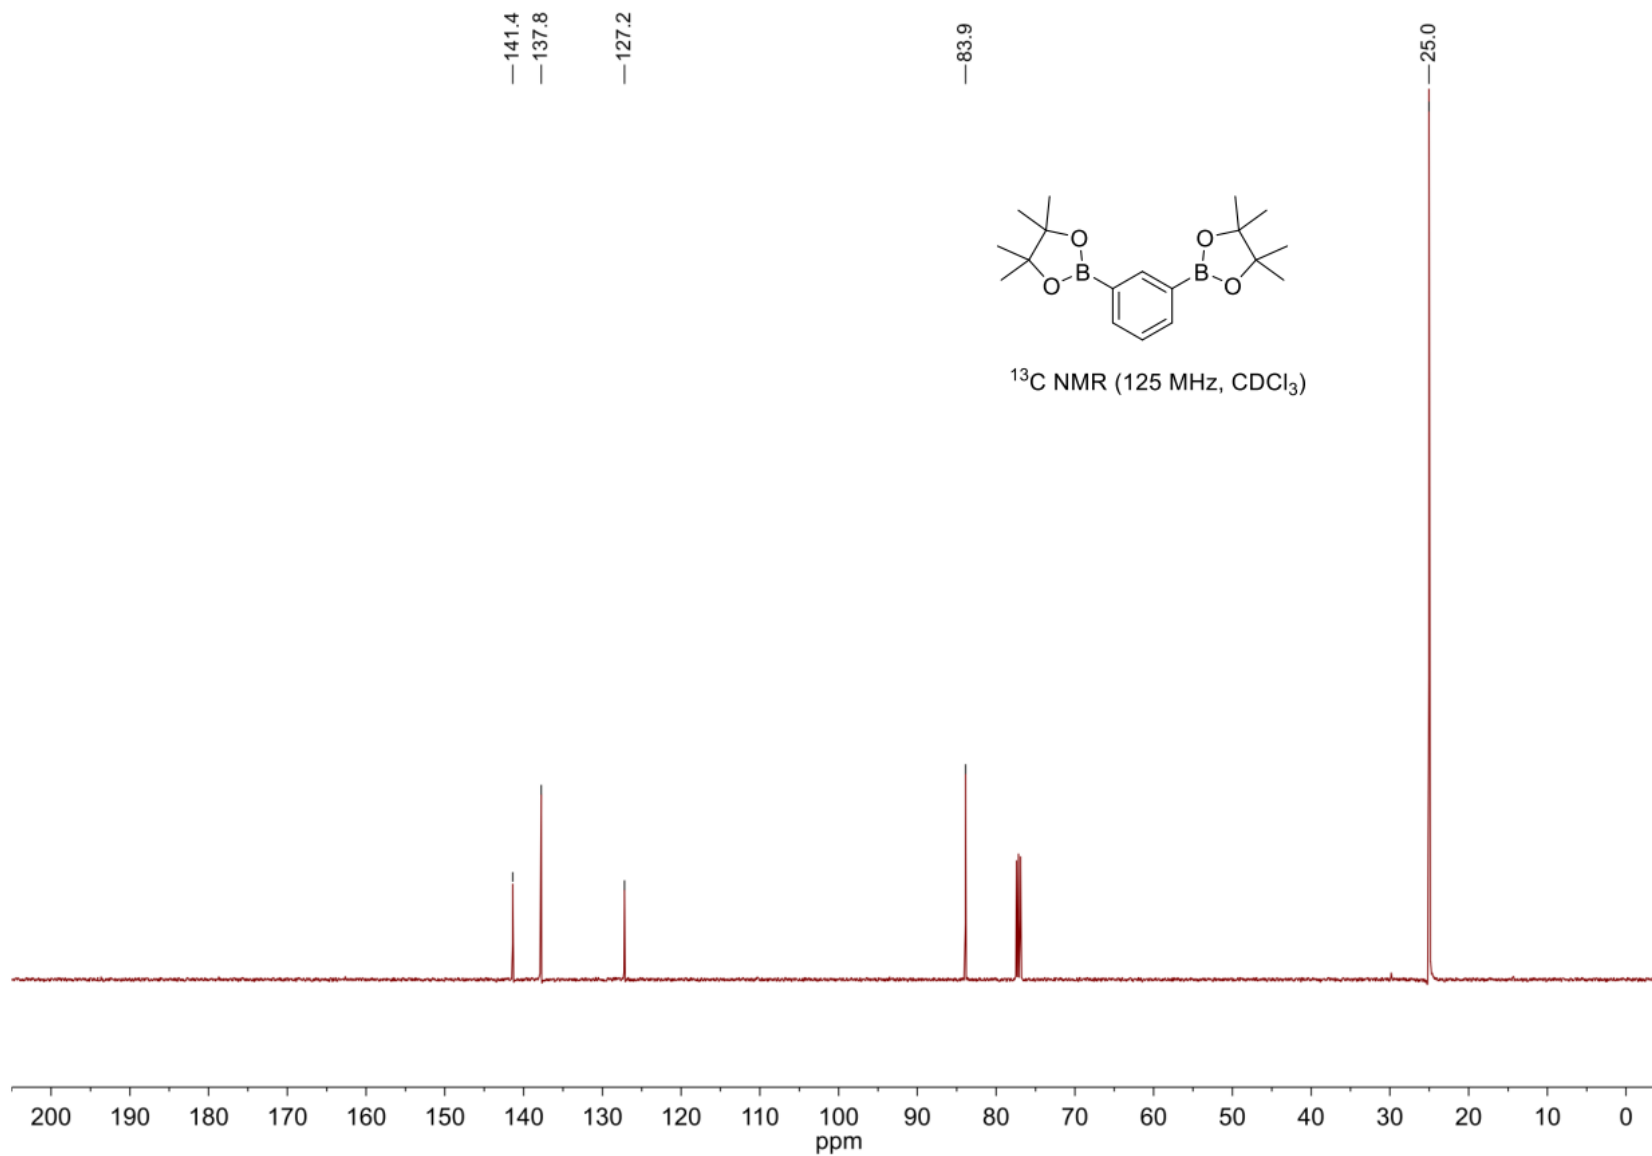



Bis(4-(4,4,5,5-tetramethyl-1,3,2-dioxaborolan-2-yl)phenyl)methane (112)

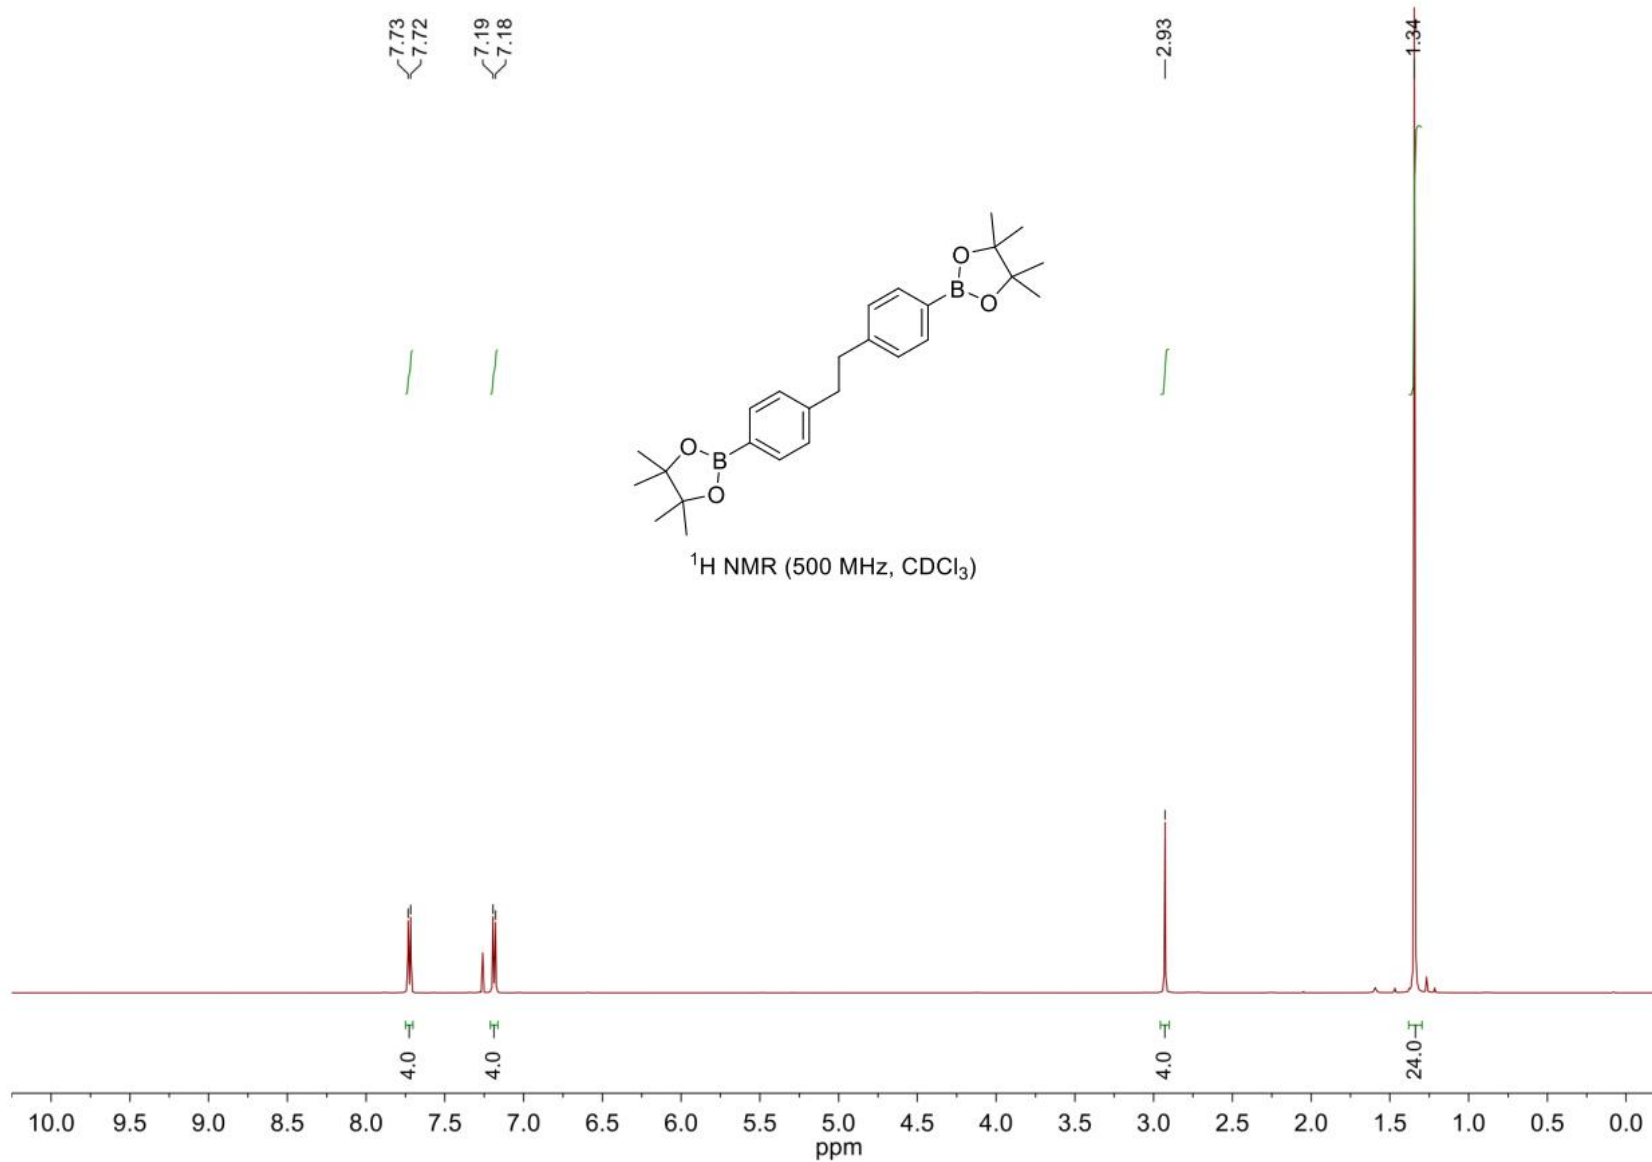

Bis(4-(4,4,5,5-tetramethyl-1,3,2-dioxaborolan-2-yl)phenyl)methane (112)

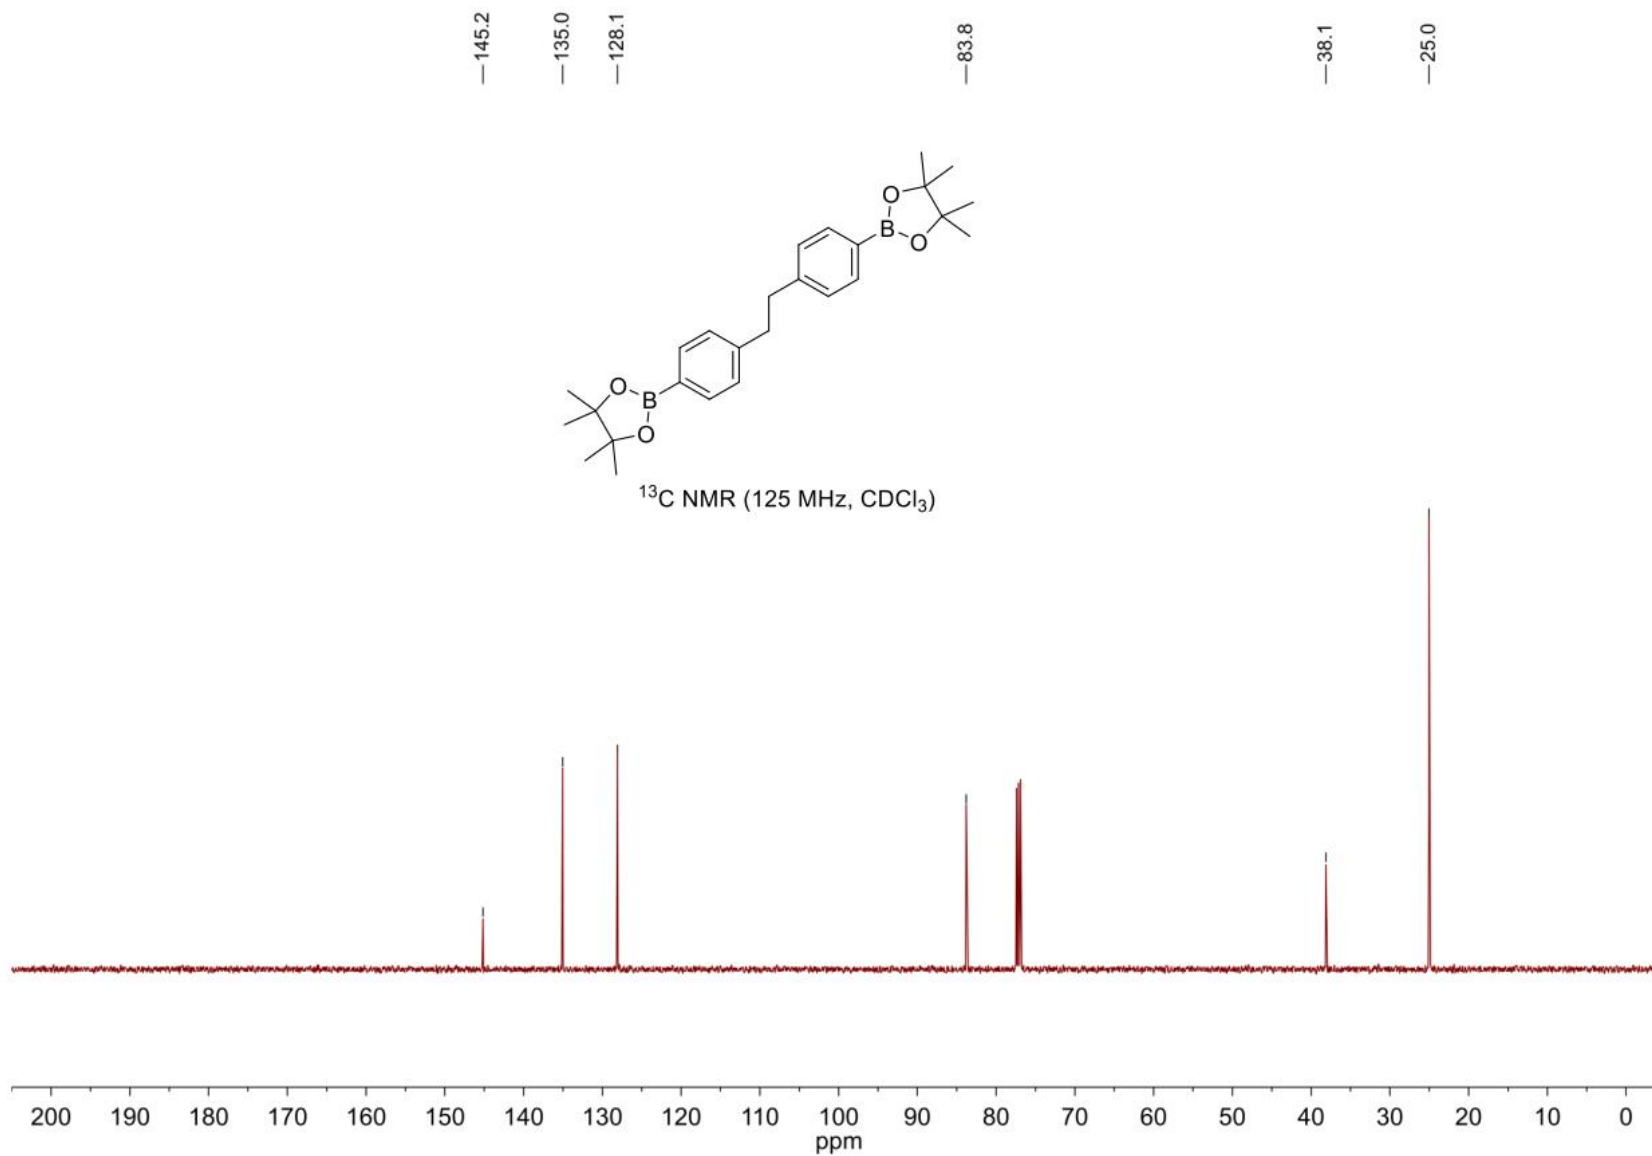

# 1,2-Bis(4-(4,4,5,5-tetramethyl-1,3,2-dioxaborolan-2-yl)phenyl)ethane (113)

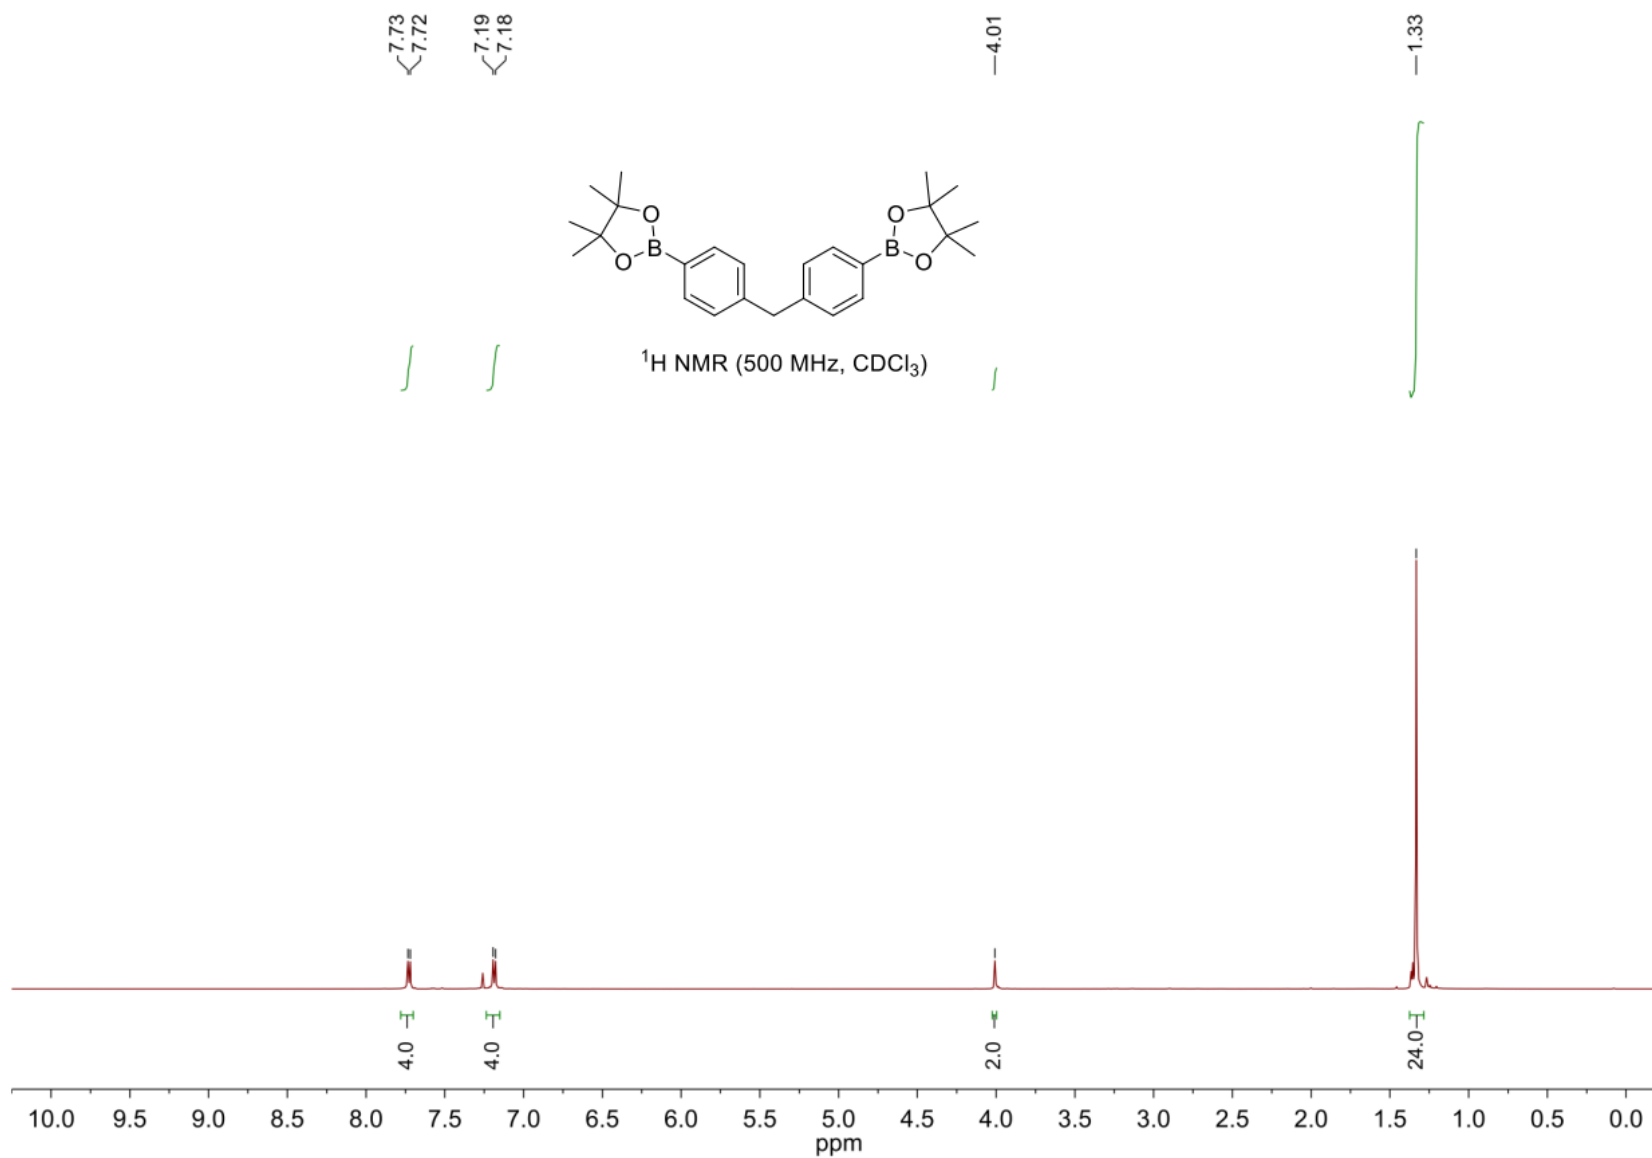

# 1,2-Bis(4-(4,4,5,5-tetramethyl-1,3,2-dioxaborolan-2-yl)phenyl)ethane (113)

—144.2  
—135.1  
—128.6  
  
—83.8  
  
—42.4  
—25.0

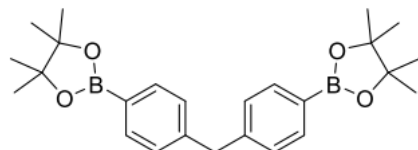

$^{13}\text{C}$  NMR (125 MHz,  $\text{CDCl}_3$ )

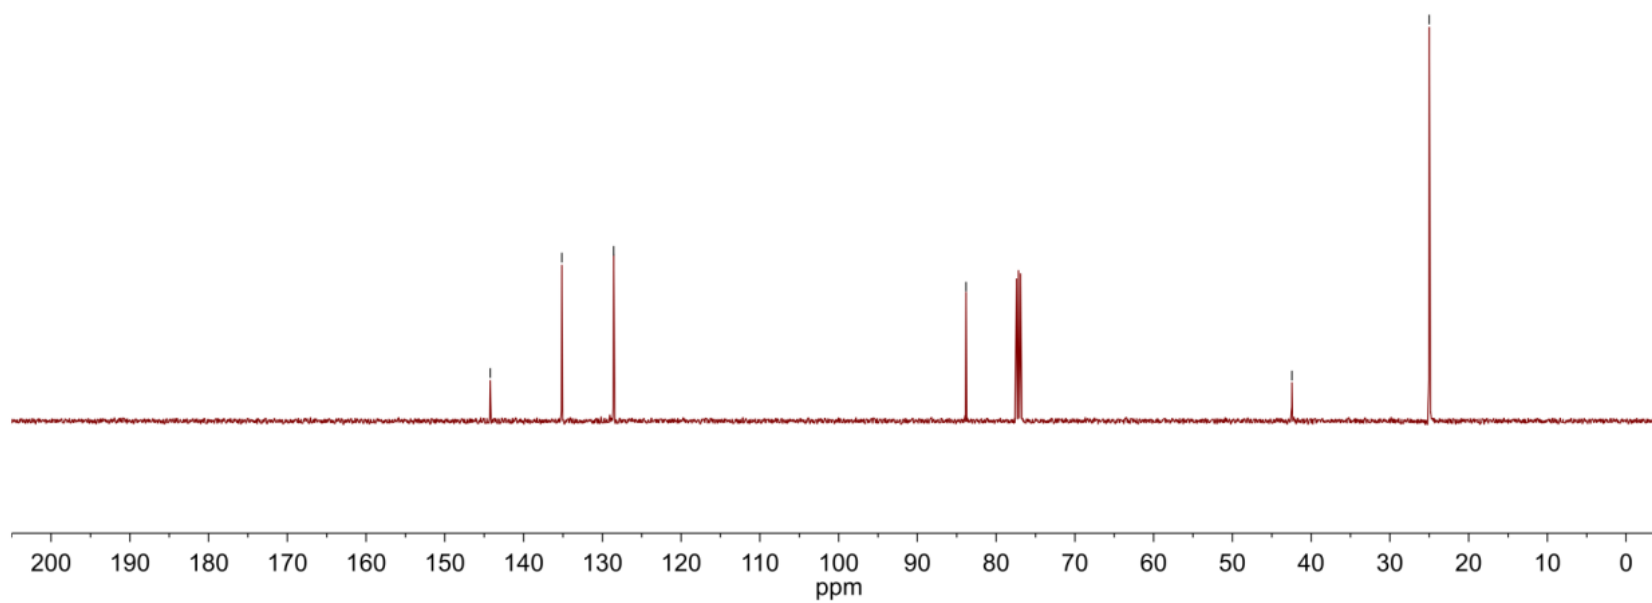

S500

# Ethyl 4-(5,5-dimethyl-1,3,2-dioxaborinan-2-yl)benzoate (114)

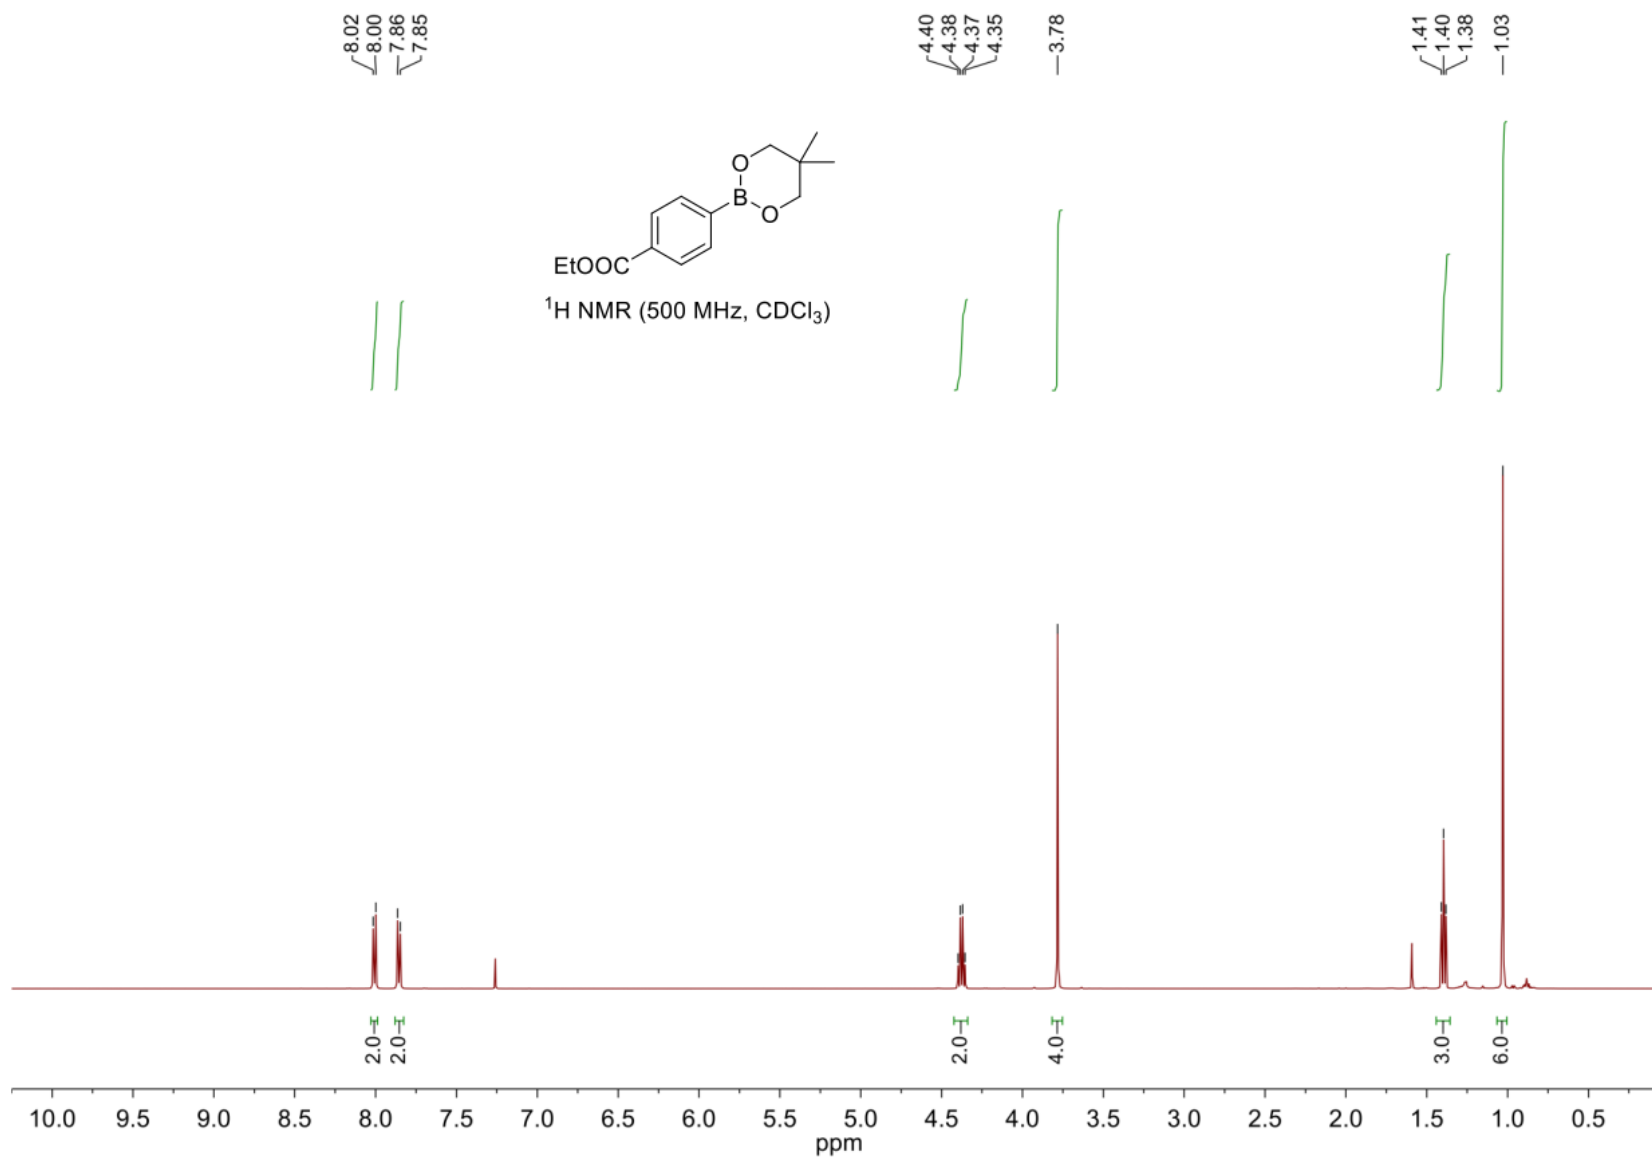

S501

# Ethyl 4-(5,5-dimethyl-1,3,2-dioxaborinan-2-yl)benzoate (114)

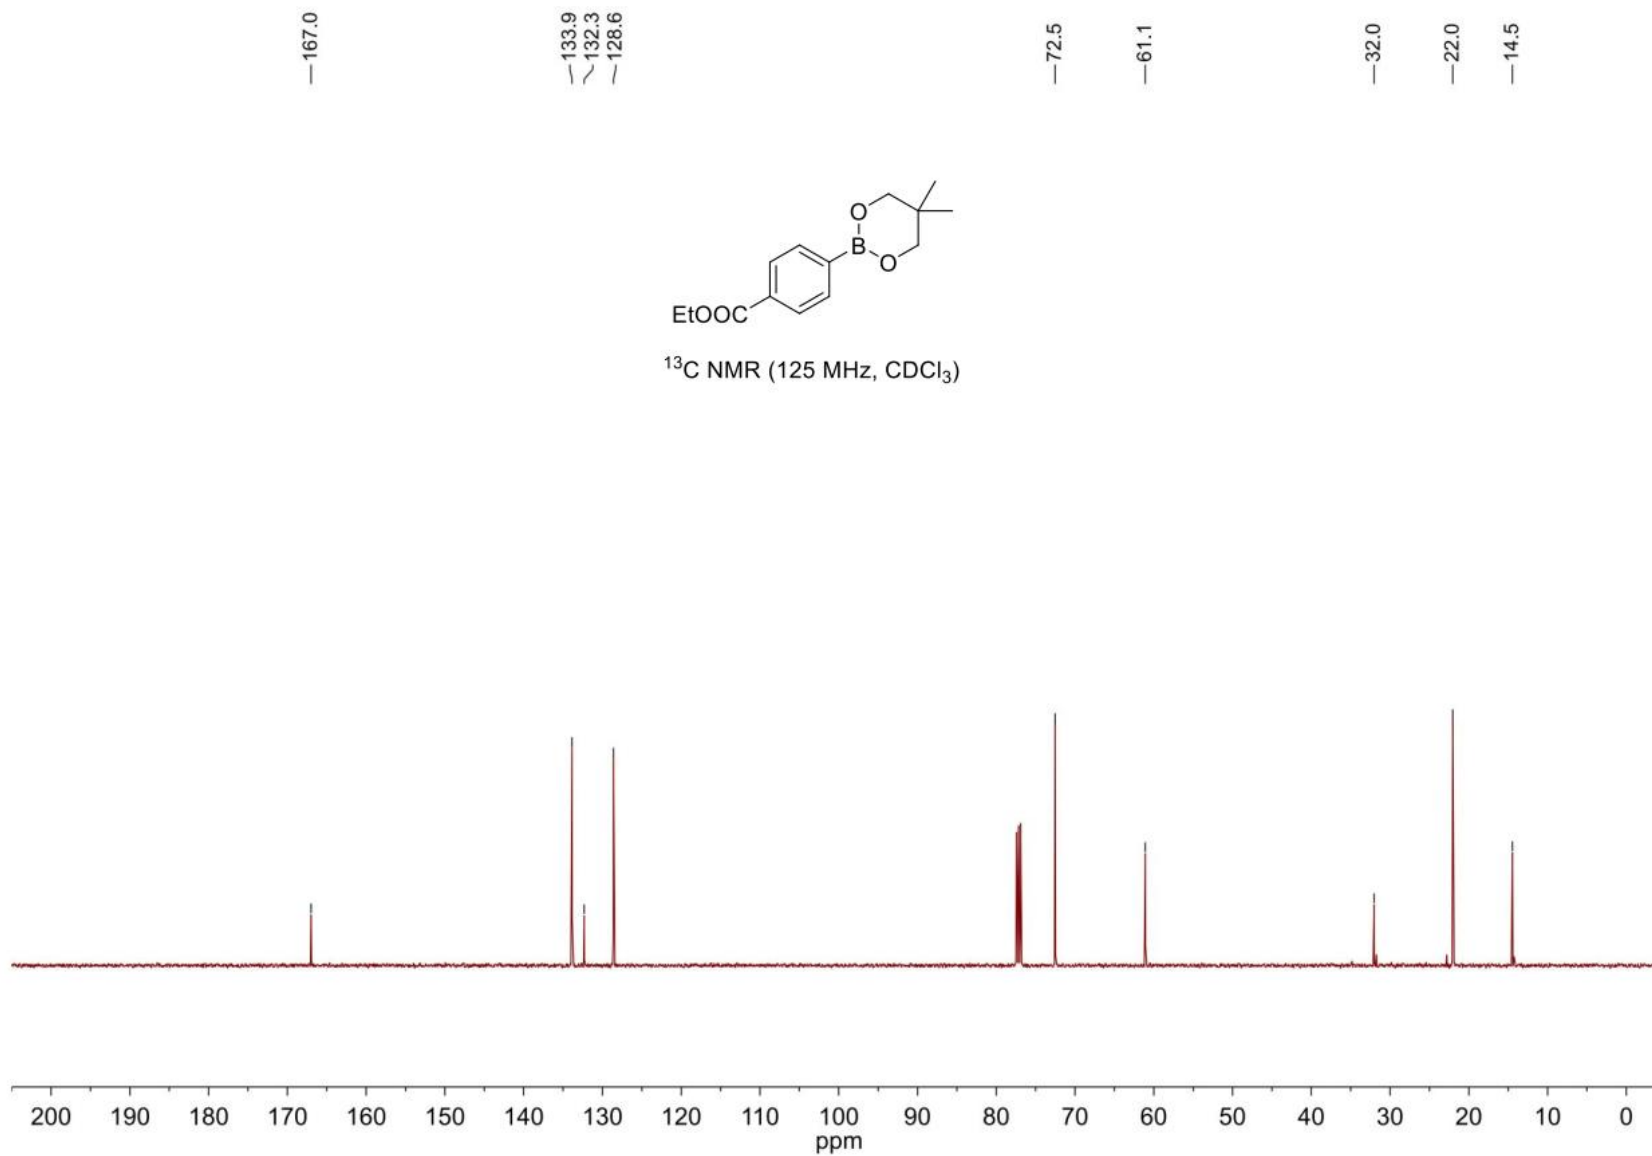

(4-(Ethoxycarbonyl)phenyl)boronic acid (115)

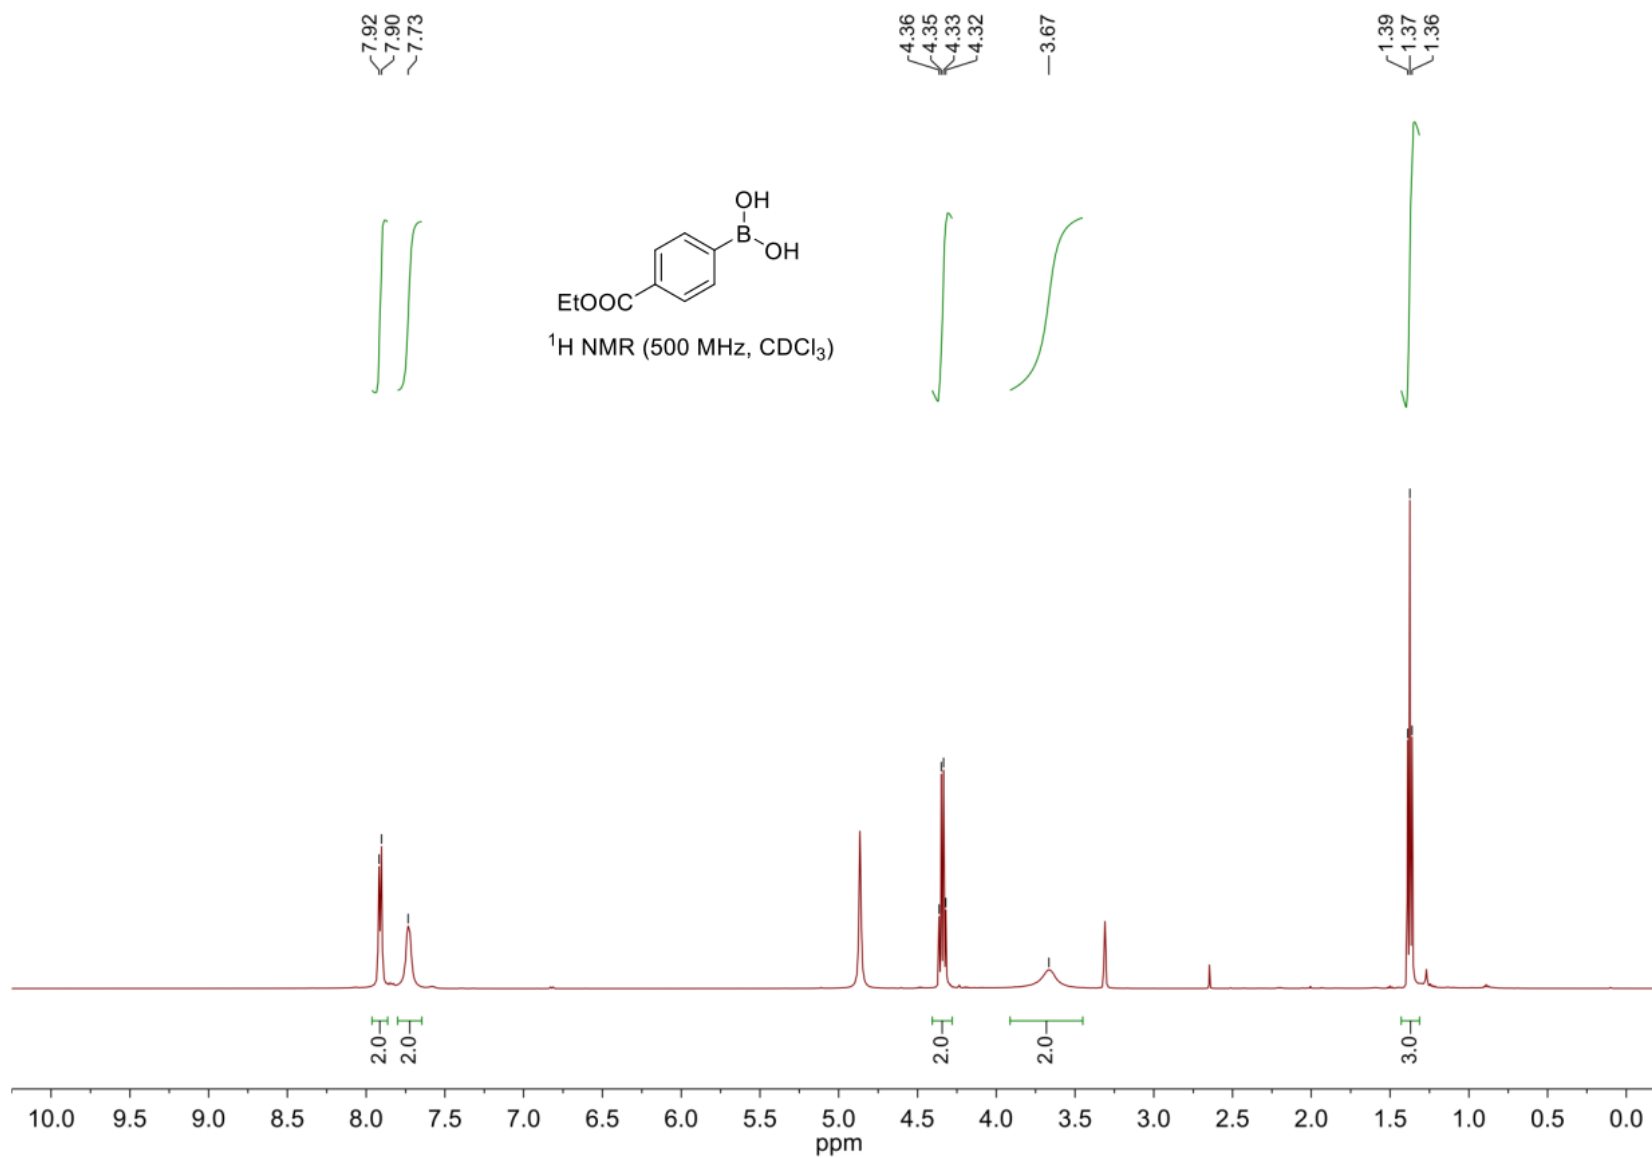

(4-(Ethoxycarbonyl)phenyl)boronic acid (115)

—168.7

—134.5

—129.0

—64.5

—61.9

—14.6

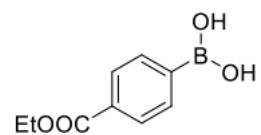

$^{13}\text{C}$  NMR (125 MHz,  $\text{CDCl}_3$ )

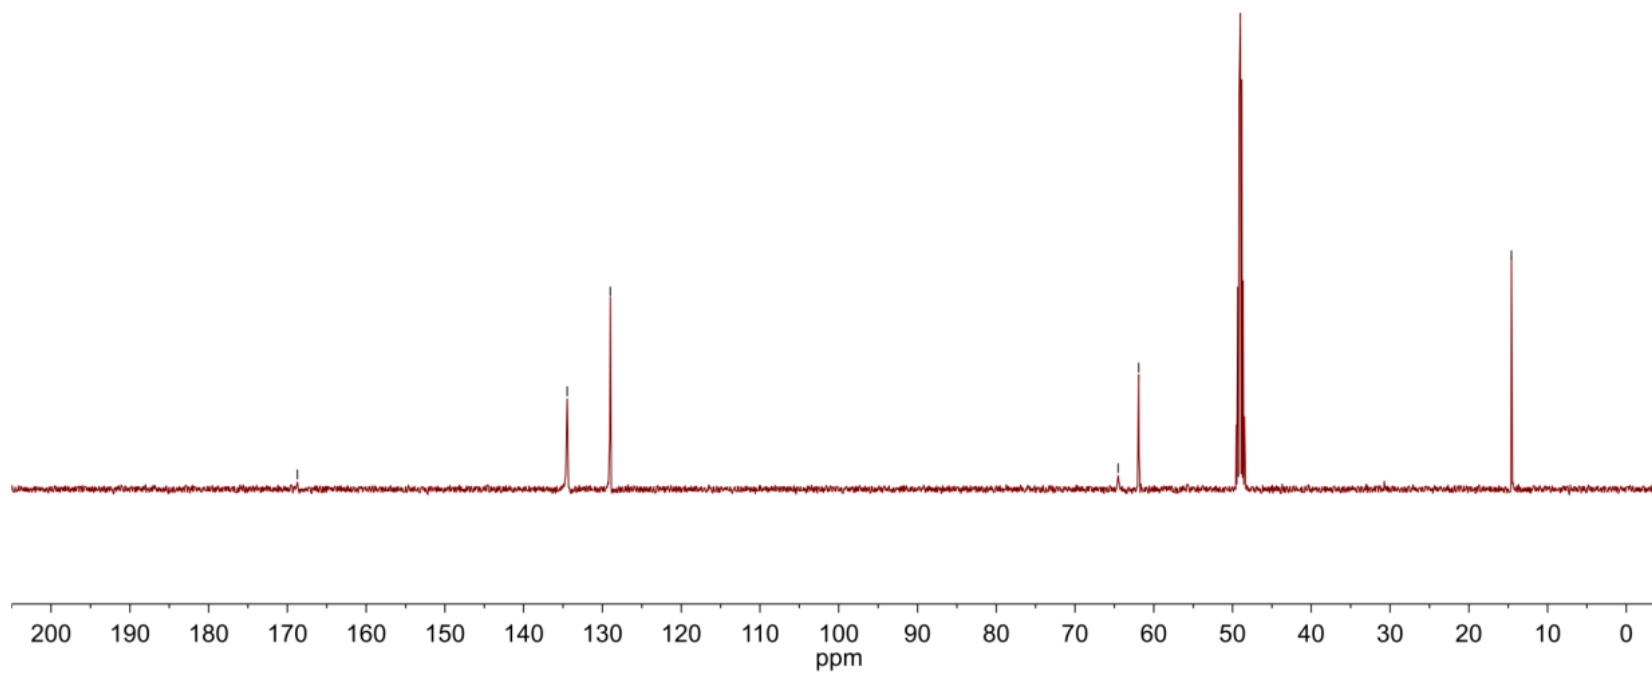

S504



# Ethyl 4-(4,4,6-trimethyl-1,3,2-dioxaborinan-2-yl)benzoate (116)

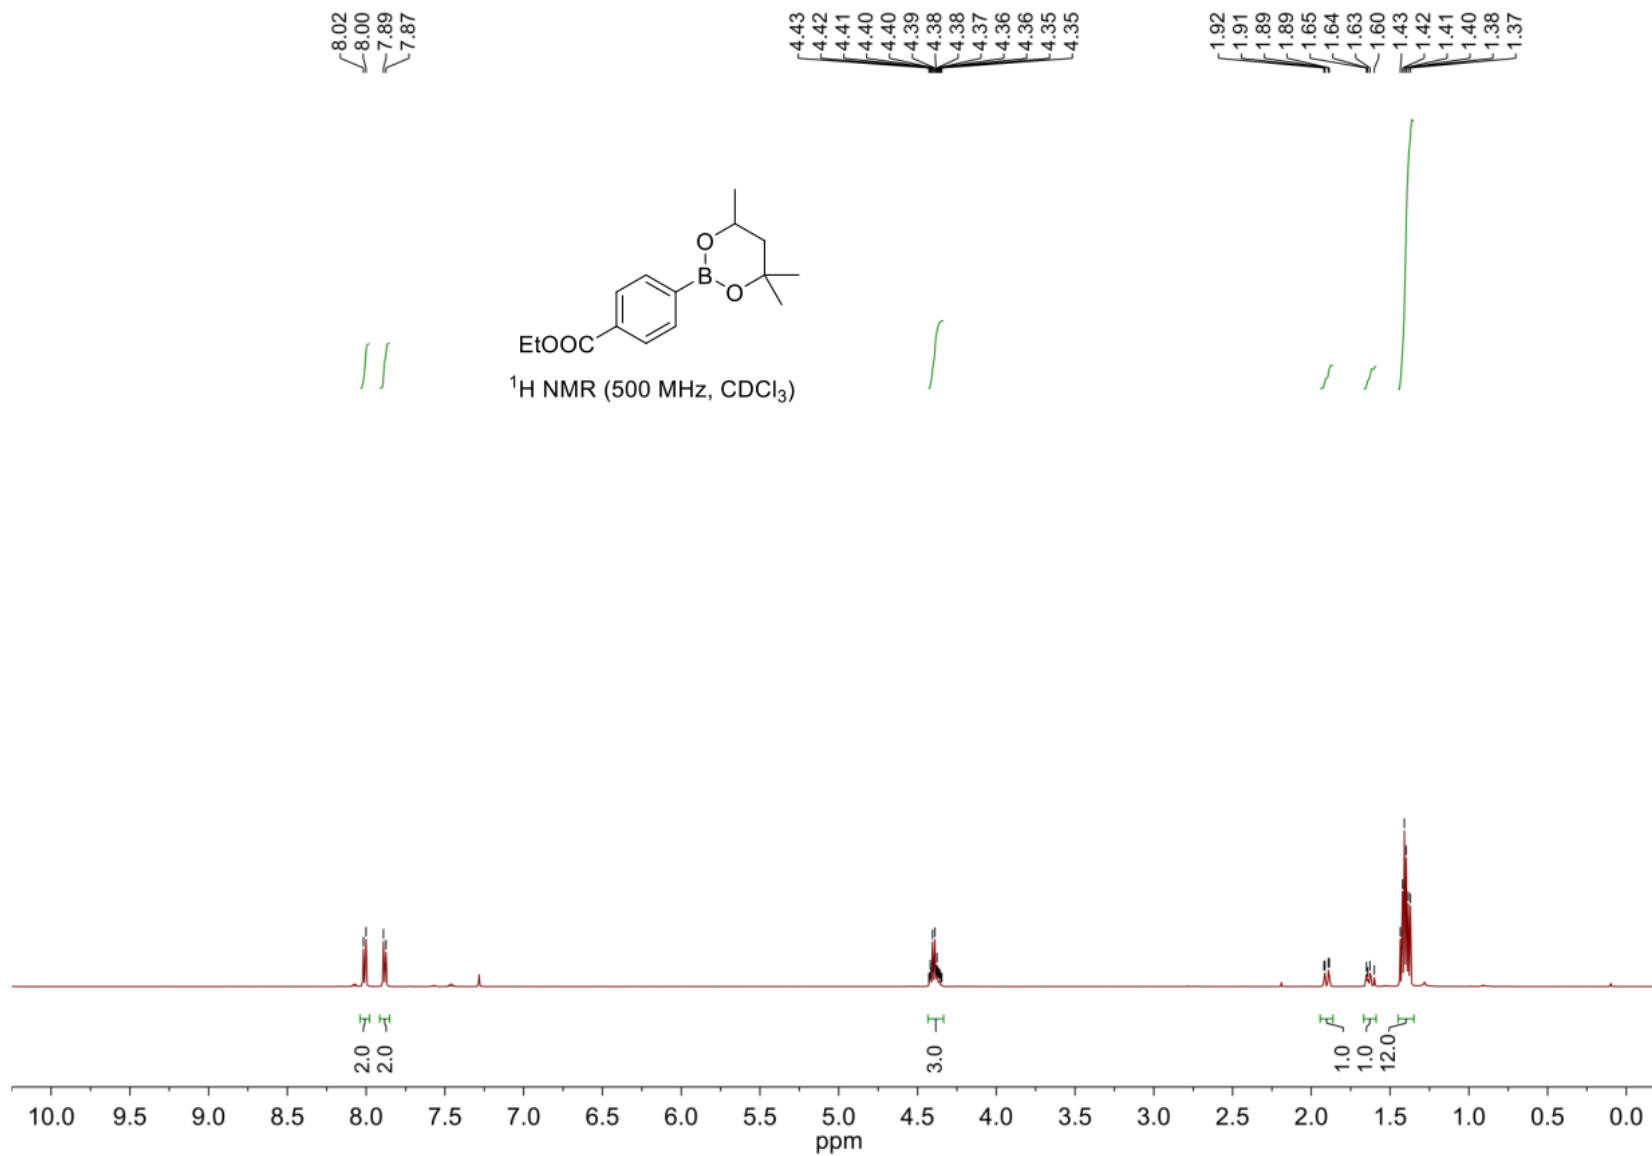

S505

# Ethyl 4-(4,4,6-trimethyl-1,3,2-dioxaborinan-2-yl)benzoate (116)

—167.1

—133.8  
—132.0  
—128.5

—71.5

—65.3

—61.0

—46.1

—31.4

—28.3

—23.3

—14.5

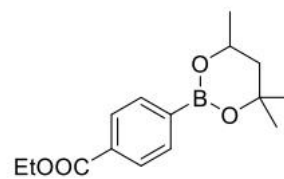

$^{13}\text{C}$  NMR (125 MHz,  $\text{CDCl}_3$ )

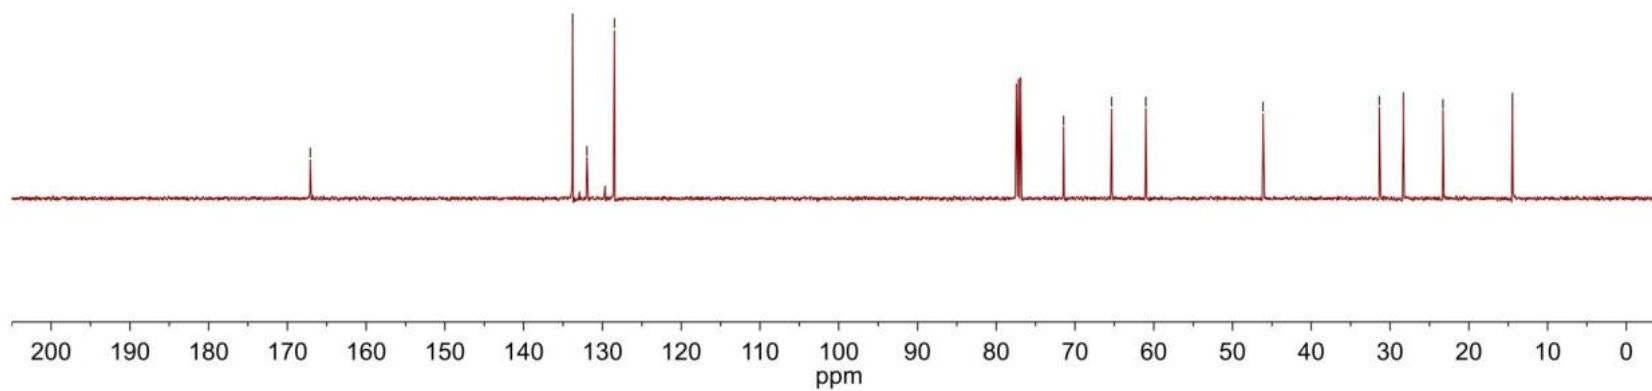

S506

# Ethyl 4-(4,4,6,6-tetramethyl-1,3,2-dioxaborinan-2-yl)benzoate (117)

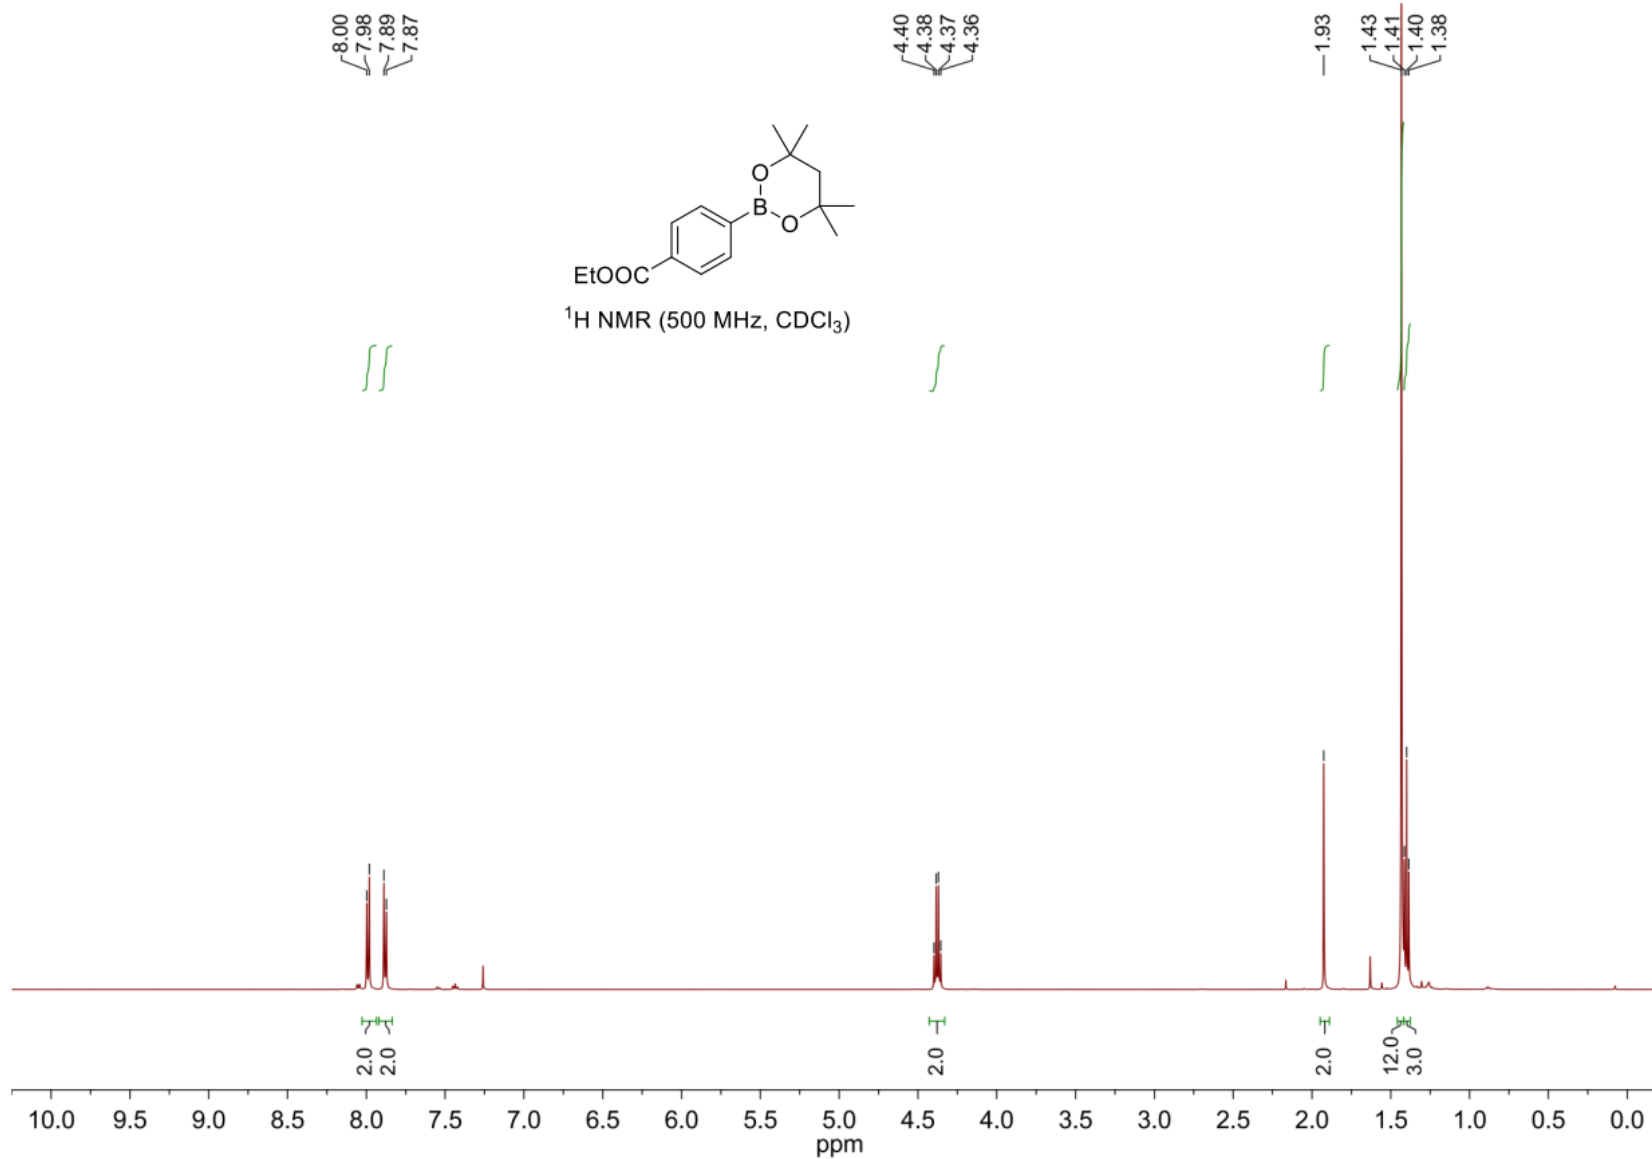

S507

# Ethyl 4-(4,4,6,6-tetramethyl-1,3,2-dioxaborinan-2-yl)benzoate (117)

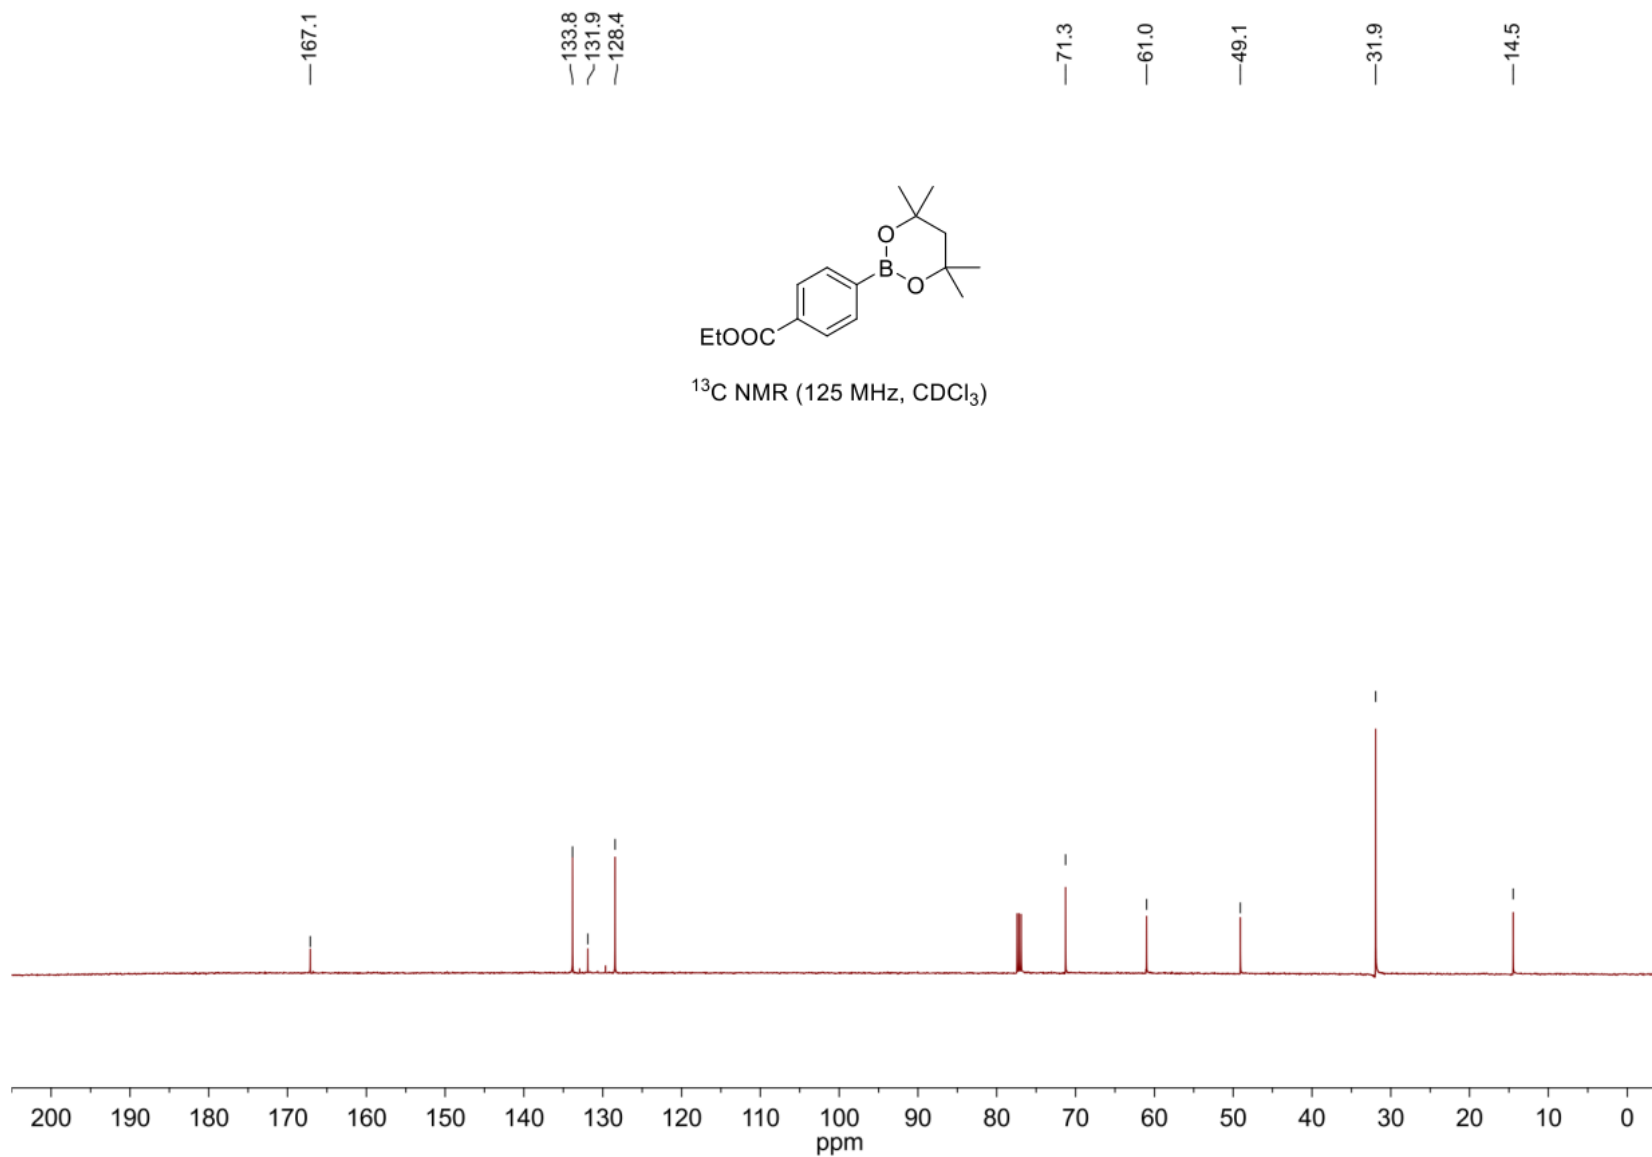

Ethyl 4-((3a*S*,4*S*,6*S*,7a*R*)-3a,5,5-trimethylhexahydro-4,6-methanobenzo[*d*][1,3,2]dioxaborol-2-yl)benzoate (118)

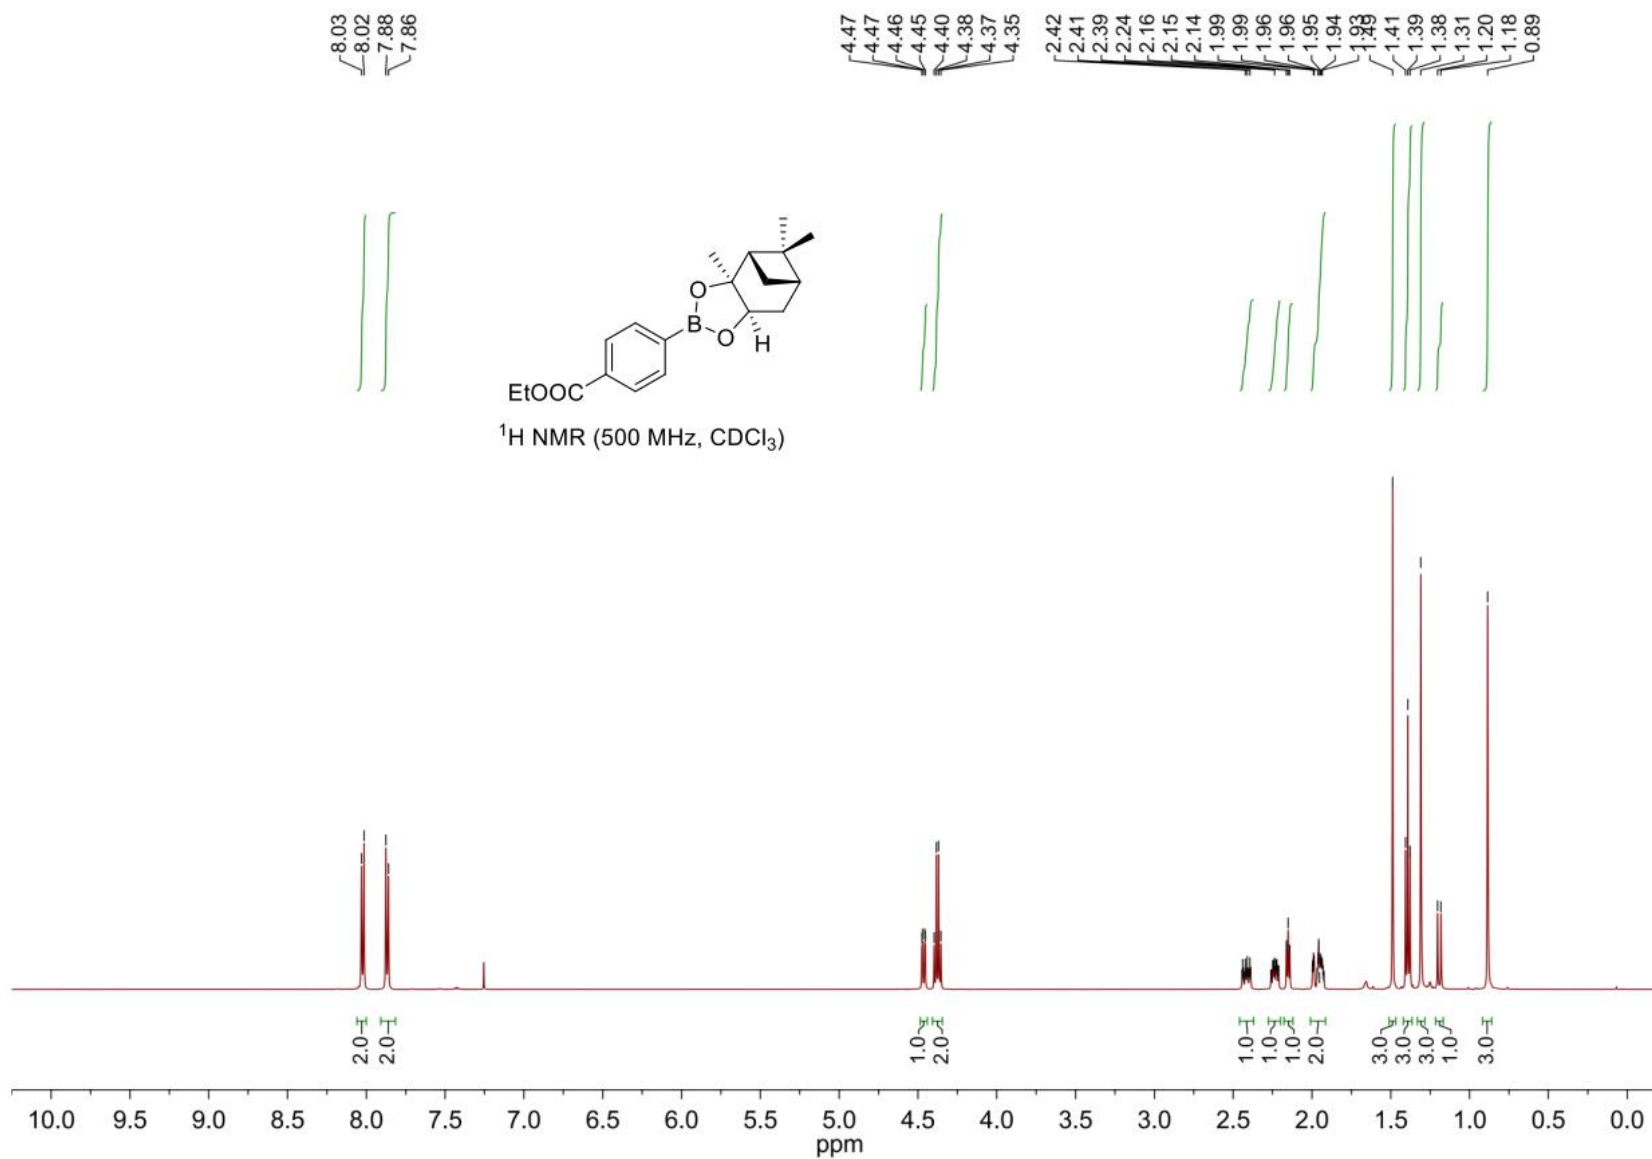

Ethyl 4-((3a*S*,4*S*,6*S*,7a*R*)-3a,5,5-trimethylhexahydro-4,6-methanobenzo[*d*][1,3,2]dioxaborol-2-yl)benzoate (118)

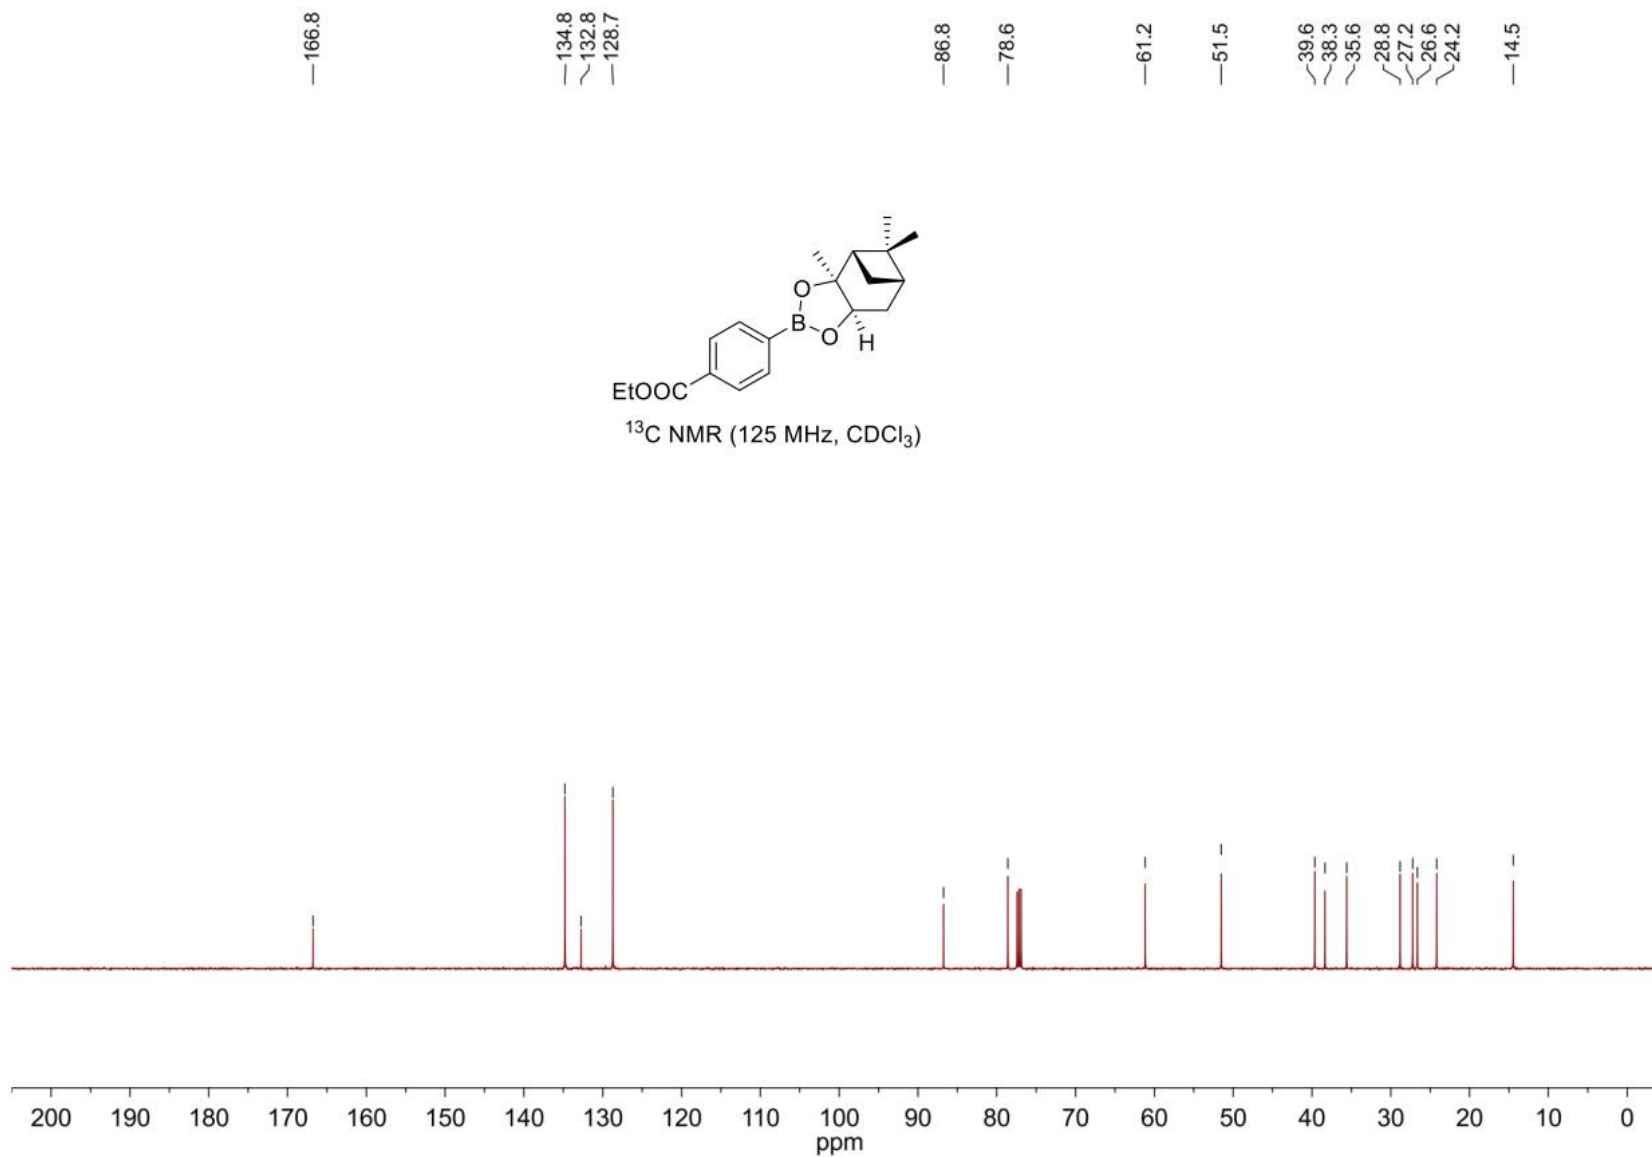

## References

- [1] Cuthbertson, T. J.; Ibanez, M.; Rijnbrand, C. A.; Jackson, A. J.; Mittapalli, G. K.; Zhao, F.; Macdonald, J. E.; Wong-Staal, F. Hepatitis c virus entry inhibitors. *PCT Int. Appl.* 2008021745, 2008.
- [2] Huang, J. H., Yang, L. M. Nickel-Catalyzed Amination of Aryl Phosphates Through Cleaving Aryl C–O Bonds. *Org. Lett.* **2011**, *13*, 3750–3753.
- [3] Zhu, R. Y.; Liu, L.Y.; and Yu, J. Q. Highly Versatile  $\beta$ -C(sp<sup>3</sup>)-H Iodination of Ketones Using a Practical Auxiliary. *J. Am. Chem. Soc.* **2017**, *139*, 12394–12397.
- [4] Placidi, M. P.; Botta, M.; Kálmán, F. K.; Hagberg, G. E.; Baranyai, Z.; Krenzer, A.; Rogerson, A. K.; Tóth, I.; Logothetis, N. K.; Angelovski, G. Aryl-Phosphonate Lanthanide Complexes and Their Fluorinated Derivatives: Investigation of Their Unusual Relaxometric Behavior and Potential Application as Dual Frequency 1H/19F MRI Probes. *Chem.: Eur. J.* **2013**, *19*, 11644–11660.
- [5] (a) Lakowicz, J. R. *Principles of fluorescence spectroscopy*; Springer: Germany, 2006. (b) Romero, N. A.; Nicewicz, D. A. Organic Photoredox Catalysis. *Chem. Rev.* **2016**, *116*, 10075–10166.
- [6] Martínez-Gualda, A. M., Cano, R., Marzo, L., Pérez-Ruiz, R., Luis-Barrera, J., Mas-Ballesté, R., Fraile, A., Víctor, A. and Alemán, J. Chromoselective Access to Z-or E-Allylated Amines and Heterocycles by a Photocatalytic Allylation Reaction. *Nat. Commun.* **2019**, *10*, 2634.
- [7] Espinoza, E. M.; Clark, J. A.; Soliman, J.; Derr, J. B.; Morales, M.; Vullev, V. I. Parallel Charge-Transfer Mechanisms Allow for Diversifying the Choices for Photoredox Catalysts. *J. Electrochem. Soc.* **2019**, *116*, H3175–H3187.
- [8] Bagotsky, V. S. *Fundamentals of Electrochemistry*; Wiley-Interscience: New Jersey, 2006.

- [9] Garden, S. J.; Avila, D. V.; Beckwith, A. L. J.; Bowry, V. W.; Ingold, K. U.; Lusztyk, J. Absolute Rate Constant for the Reaction of Aryl Radicals with Tri-*n*-butyltin Hydride. *J. Org. Chem.* **1996**, *61*, 805–809.
- [10] Sardashti, M.; Maciel, G.E. Carbon-13 and Nitrogen-15 Chemical Shift Tensors of Para-Substituted Benzonitriles. *J. Phys. Chem.* **1988**, *92*, 4620–4632.
- [11] Wang, L.; Xiao, Z. Y.; Hou, J. L.; Wang, G. T.; Jiang, X. K.; Li, Z. T. Self-Assembly of Vesicles from the Stacking of a Dipodal F··H–N Hydrogen Bonded Arylamide Foldamer. *Tetrahedron.* **2009**, *65*, 10544–10551.
- [12] Liu, W.; Lim, H. J.; RajanBabu, T. V. Asymmetric Hydrovinylation of Vinylindoles. A Facile Route to Cyclopenta [g] indole Natural Products (+)-*cis*-Triketrin A and (+)-*cis*-Triketrin B. *J. Am. Chem. Soc.* **2012**, *134*, 5496–5499.
- [13] Kapoor, M.; Chand-Thakuri, P.; Young, M. C. Carbon Dioxide-Mediated C(sp<sup>2</sup>)–H Arylation of Primary and Secondary Benzylamines. *J. Am. Chem. Soc.* **2019**, *141*, 7980–7989.
- [14] Tian, H.; Shimakoshi, H.; Ono, T.; Hisaeda, Y. Visible Light-Driven, One-Pot Amide Synthesis Catalyzed by the B12 Model Complex under Aerobic Conditions. *ChemPlusChem* **2019**, *84*, 237–240.
- [15] Zhang, L.; Jiao, L. Visible-Light-Induced Organocatalytic Borylation of Aryl Chlorides. *J. Am. Chem. Soc.* **2019**, *141*, 9124–9128.
- [16] Saito, Y.; Segawa, Y.; Itami, K. *para*-C–H Borylation of Benzene Derivatives by a Bulky Iridium Catalyst. *J. Am. Chem. Soc.* **2015**, *137*, 5193–5198.



- [17] Fuse, H.; Kojima, M.; Mitsunuma, H.; Kanai, M. Acceptorless Dehydrogenation of Hydrocarbons by Noble-Metal-Free Hybrid Catalyst System. *Org. Lett.* **2018**, *20*, 2042–2045.
- [18] Mfuh, A. M.; Doyle, J. D.; Chhetri, B.; Arman, H. D.; Larionov, O. V. Scalable, Metal- and Additive-Free, Photoinduced Borylation of Haloarenes and Quaternary Arylammonium Salts. *J. Am. Chem. Soc.* **2016**, *138*, 2985–2988.
- [19] Tian, Y. M.; Guo, X. N.; Kuntze-Fechner, M. W.; Krummenacher, I.; Braunschweig, H.; Radius, U.; Steffen, A.; Marder, T. B. Selective Photocatalytic C–F Borylation of Polyfluoroarenes by Rh/Ni Dual Catalysis Providing Valuable Fluorinated Arylboronate Esters. *J. Am. Chem. Soc.* **2018**, *140*, 17612–17623.
- [20] Lee, Y.; Baek, S. Y.; Park, J.; Kim, S. T.; Tussupbayev, S.; Kim, J.; Baik, M. H.; Cho, S. H. Chemoselective Coupling of 1, 1-Bis[(pinacolato)boryl]alkanes for the Transition-Metal-Free Borylation of Aryl And Vinyl Halides: A Combined Experimental and Theoretical Investigation. *J. Am. Chem. Soc.* **2016**, *139*, 976–984.
- [21] Davis, H. J.; Genov, G. R.; Phipps, R. J. *meta*-Selective C–H Borylation of Benzylamine-, Phenethylamine-, and Phenylpropylamine-Derived Amides Enabled by a Single Anionic Ligand. *Angew. Chem.* **2017**, *129*, 13536–13540.
- [22] Wollenburg, M.; Moock, D.; Glorius, F. Hydrogenation of Borylated Arenes. *Angew. Chem., Int. Ed.* **2019**, *58*, 6549–6553.
- [23] Du-Cuny, L.; Xiao, Q.; Xun, G.; Zheng, Q. Preparation of Substituted 5-Cyanoindole Compounds for the Treatment of Lysine(K)–Specific Demethylase 1A Mediated Diseases. PCT Int. Appl. WO 2018234978 A1 20181227, 2018.

- [24] Liao, Y., Xu, L., Ou, S., Edwards, H., Luedtke, D., Ge, Y., Qin, Z. H<sub>2</sub>O<sub>2</sub>/Peroxynitrite-Activated Hydroxamic Acid HDAC Inhibitor Prodrugs Show Antileukemic Activities against AML Cells. *ACS Med. Chem. Lett.* **2018**, *9*, 635-640.
- [25] Wang, P.; Chen, S.; Zhou, Z.; Cheng, H.G.; Zhou, Q. Chemoselective Borono-Catellani Arylation for Unsymmetrical Biaryls Synthesis. *Org. Lett.* **2019**, *21*, 3323–3327.
- [26] Wu, Q.; Xiong, X.; Cao, Y.; He, L.; Fei, Z. Exemplifying Prediction of Preferred Coupling Partners in Developing a Buchwald-Hartwig Coupling for the Synthesis of a c-Kit Inhibitor. *Org. Process Res. Dev.* **2018**, *22*, 557–561.
- [27] Jelier, B. J.; Tripet, P. F.; Pietrasiak, E.; Franzoni, I.; Jeschke, G.; Togni, A. Radical Trifluoromethoxylation of Arenes Triggered by a Visible-Light-Mediated N–O Bond Redox Fragmentation. *Angew. Chem., Int. Ed.* **2018**, *57*, 13784–13789.
- [28] Xu, Y.; Yang, X.; Fang, H. Additive-and Photocatalyst-Free Borylation of Arylazo Sulfones under Visible Light. *J. Org. Chem.* **2018**, *83*, 12831–12837.
- [29] Heffron, T. P.; Salphati, L.; Alicke, B.; Cheong, J.; Dotson, J.; Edgar, K.; Goldsmith, R.; Gould, S. E.; Lee, L. B.; Lesnick, J. D.; Lewis, C. The Design and Identification of Brain Penetrant Inhibitors of Phosphoinositide 3-Kinase  $\alpha$ . *J. Med. Chem.* **2012**, *55*, 8007–8020.
- [30] Siebenbuerger, L.; Hernandez-Olmos, V.; Abdelsamie, A. S.; Frotscher, M.; van Koppen, C. J.; Marchais-Oberwinkler, S.; Scheuer C.; Laschke W. M.; Menger D. M.; Boerger C.; Hartmann, R. W. Highly Potent 17 $\beta$ -HSD2 Inhibitors with a Promising Pharmacokinetic Profile for Targeted Osteoporosis Therapy. *J. Med. Chem.* **2018**, *61*, 10724–10738.

- [31] Ren, H.; Zhou, Y. P.; Bai, Y.; Cui, C.; Driess, M. Cobalt-Catalyzed Regioselective Borylation of Arenes: N-Heterocyclic Silylene as an Electron Donor in the Metal-Mediated Activation of C–H Bonds. *Chem.: Eur. J.* **2017**, *23*, 5663–5667.
- [32] Tsuchiya, S.; Saito, H.; Nogi, K.; Yorimitsu, H. Aromatic Metamorphosis of Indoles into 1, 2-Benzazaborins. *Org. Lett.* **2019**, *21*, 3855–3860.
- [33] Fawcett, A.; Murtaza, A.; Gregson, C. H.; Aggarwal, V. K. Strain-Release-Driven Homologation of Boronic Esters: Application to the Modular Synthesis of Azetidines. *J. Am. Chem. Soc.* **2019**, *141*, 4573–4578.
- [34] Aspiotis, R.; Deschênes, D.; Dubé, D.; Girard, Y.; Huang, Z.; Laliberté, F.; Liu, S.; Papp, R.; Nicholson, D. W.; Young, R. N. The Discovery and Synthesis of Highly Potent Subtype Selective Phosphodiesterase 4D Inhibitors. *Bioorg. Med. Chem. Lett.* **2010**, *20*, 5502–5505.
- [35] Zhang, M. Y.; Barrow, R. A. Accessing Polyoxygenated Dibenzofurans via the Union of Phenols and o-Benzoquinones: Rapid Syntheses of Metabolites Isolated from *Ribes takare*. *Org. Lett.* **2017**, *19*, 2302–2305.
- [36] Nitelet, A.; Thevenet, D.; Schiavi, B.; Hardouin, C.; Fournier, J.; Tamion, R.; Pannecoucke, X.; Jubault, P.; Poisson, T. Copper-Photocatalyzed Borylation of Organic Halides under Batch and Continuous-Flow Conditions. *Chem.: Eur. J.* **2019**, *25*, 3262–3266.
- [37] Lian, C.; Yue, G.; Mao, J.; Liu, D.; Ding, Y.; Liu, Z.; Qiu, D.; Zhao, X.; Lu, K.; Fagnoni, M.; Protti, S. Visible-Light-Driven Synthesis of Arylstannanes from Arylazo Sulfones. *Org. Lett.* **2019**, *21*, 5187–5191.
- [38] Hinkes, S. P.; Klein, C. D. Virtues of Volatility: A Facile Transesterification Approach to Boronic Acids. *Org. Lett.* **2019**, *21*, 3048–3052

- [39] Hauwert, N. J.; Mocking, T. A.; Da Costa Pereira, D.; Lion, K.; Huppelschoten, Y.; Vischer, H. F.; De Esch, I. J.; Wijtmans, M.; Leurs, R. A Photoswitchable Agonist for the Histamine H<sub>3</sub> Receptor, a Prototypic Family AG-Protein-Coupled Receptor. *Angew. Chem., Int. Ed.* **2019**, *58*, 4531–4535.
- [40] Ye, Y.; Sanford, M. S. Mild Copper-Mediated Fluorination of Aryl Stannanes and Aryl Trifluoroborates. *J. Am. Chem. Soc.* **2013**, *135*, 4648–4651.
- [41] Ling, L.; He, Y.; Zhang, X.; Luo, M.; Zeng, X. Hydrogenation of (Hetero)aryl Boronate Esters with a Cyclic (Alkyl)(amino)carbene–Rhodium Complex: Direct Access to cis-Substituted Borylated Cycloalkanes and Saturated Heterocycles. *Angew. Chem., Int. Ed.* **2019**, *58*, 6554–6558.
- [42] Xu, X. L.; Li, Z. Catalytic Redox Chain Ring Opening of Lactones with Quinones To Synthesize Quinone-Containing Carboxylic Acids. *Org. Lett.* **2019**, *21*, 5078–5081.
- [43] Zhang, L.; Jiao, L. Pyridine-Catalyzed Radical Borylation of Aryl Halides. *J. Am. Chem. Soc.* **2016**, *139*, 607–610.
- [44] Markoulides, M. S.; Venturini, C.; Neumeyer, D.; Gourdon, A. Oxidative Cyclodehydrogenation of a Perylene Derivative: Different Reagents Give Different Products. *New J. Chem.* **2015**, *39*, 6498–6503.
- [45] Hangeland, J. J.; Friends, T. J.; Doweiko, A. M.; Mellström, K.; Sandberg, J.; Grynfarb, M.; Ryono, D. E. A New Class of High Affinity Thyromimetics Containing a Phenyl-Naphthylene Core. *Bioorg. Med. Chem. Lett.* **2005**, *15*, 4579–4584.
- [46] Wang, P.; Felsing, D. E.; Chen, H.; Raval, S. R.; Allen, J. A.; Zhou, J. Synthesis and Pharmacological Evaluation of Noncatechol G Protein Biased and Unbiased Dopamine D<sub>1</sub> Receptor Agonists. *ACS Med. Chem. Lett.* **2019**, *10*, 792–799.

- [47] Molander, G. A.; Cavalcanti, L. N.; Garcia-Garcia, C. Nickel-catalyzed borylation of halides and pseudohalides with tetrahydroxydiboron [B<sub>2</sub>(OH)<sub>4</sub>]. *J. Org. Chem.* **2013**, *78*, 6427–6439.
- [48] Davies, G. H.; Zhou, Z. Z.; Jouffroy, M.; Molander, G. A. Method for Accessing Nitrogen-Containing, B-Heteroaryl-Substituted 2,1-Borazaronaphthalenes. *J. Org. Chem.* **2017**, *82*, 549–555.
- [49] Wu, Y. J.; Venables, B.; Guernon, J.; Chen, J.; Sit, S. Y.; Rajamani, R.; Knox, R. J.; Matchett, M.; Pieschl, R. L.; Herrington, J.; Bristow, L. J. Discovery of New Indole-Based Acylsulfonamide Nav1.7 Inhibitors. *Bioorg. Med. Chem. Lett.* **2019**, *29*, 659–663.
- [50] Kaneko, T.; Fotouhi, N. Heteroaryltrifluoroborate compounds for the treatment of mycobacterial infections. PCT Int. Appl. WO 2018067762 A2 20180412, 2018.
- [51] Solomin, V. V.; Radchenko, D. S.; Slobodyanyuk, E. Y.; Geraschenko, O. V.; Vashchenko, B. V.; Grygorenko, O. O. Widely Exploited, Yet Unreported: Regiocontrolled Synthesis and the Suzuki–Miyaura Reactions of Bromooxazole Building Blocks. *Eur. J. Org. Chem.* **2019**, *18*, 2884–2898.
- [52] Molander, G. A.; Argintaru, O. A.; Aron, I.; Dreher, S. D. Nickel-Catalyzed Cross-Coupling of Potassium Aryl- and Heteroaryltrifluoroborates with Unactivated Alkyl Halides. *Org. Lett.* **2010**, *12*, 5783–5785.
- [53] Akay, S.; Yang, W.; Wang, J.; Lin, L.; Wang, B. Synthesis and Evaluation of Dual Wavelength Fluorescent Benzo[B]Thiophene Boronic Acid Derivatives for Sugar Sensing. *Chem. Biol. Drug Des.* **2007**, *70*, 279–289.
- [54] Qiao, Y.; Yang, Q.; Schelter, E. J. Photoinduced Miyaura Borylation by a Rare-Earth-Metal Photoreductant: The Hexachlorocerate(III) Anion. *Angew. Chem.* **2018**, *130*, 11165–11169.

- [55] Haydl, A. M.; Hartwig, J. F. Palladium-Catalyzed Methylation of Aryl, Heteroaryl, and Vinyl Boronate Esters. *Org. Lett.* **2019**, *21*, 1337–1341.
- [56] Saito, H.; Nogi, K.; Yorimitsu, H. Copper-Catalyzed Ring-Opening Silylation of Benzofurans with Disilane. *Angew. Chem., Int. Ed.* **2018**, *57*, 11030–11034.
- [57] Bheeter, C. B.; Chowdhury, A. D.; Adam, R.; Jackstell, R.; Beller, M. Efficient Rh-Catalyzed C–H Borylation of Arene Derivatives under Photochemical Conditions. *Org. Biomol. Chem.* **2015**, *13*, 10336–10340.
- [58] Lovell, T. C.; Colwell, C. E.; Zakharov, L. N.; Jasti, R. Symmetry Breaking and the Turn-On Fluorescence of Small, Highly Strained Carbon Nanohoops. *Chem. Sci.* **2019**, *10*, 3786–3790.
- [59] Baltus, C. B.; Chuckowree, I. S.; Press, N. J.; Day, I. J.; Coles, S. J.; Tizzard, G. J.; Spencer, J. Olefin Cross-Metathesis/Suzuki–Miyaura Reactions on Vinylphenylboronic Acid Pinacol Esters. *Tetrahedron Lett.* **2013**, *54*, 1211–1217.
- [60] Hu, J.; Sun, H.; Cai, W.; Pu, X.; Zhang, Y.; Shi, Z. Nickel-Catalyzed Borylation of Aryl- and Benzyltrimethylammonium Salts Via C–N Bond Cleavage. *J. Org. Chem.* **2015**, *81*, 14–
- [61] Moon, P. J.; Fahandej-Sadi, A.; Qian, W.; Lundgren, R. J. Decarboxylative Benzoylation of Aryl and Alkenyl Boronic Esters. *Angew. Chem., Int. Ed.* **2018**, *57*, 4612–4616.
- [62] Deng, Y.; Weng, X.; Li, Y.; Su, M.; Wen, Z.; Ji, X.; Ren, N.; Shen, B.; Duan, Y.; Huang, Y. Late-Stage Functionalization of Platensimycin Leading to Multiple Analogues with Improved Antibacterial Activity In Vitro and In Vivo. *J. Med. Chem.* **2019**, *62*, 6682–6693.

- [63] Murata, M.; Oda, T.; Sogabe, Y.; Tone, H.; Namikoshi, T.; Watanabe, S. Palladium-Catalyzed Borylation of Aryl Arenesulfonates with Dialkoxyboranes. *Chem. Lett.* **2011**, *40*, 962–963.
- [64] Gaussian 16, Revision B.01, Frisch, M. J.; Trucks, G. W.; Schlegel, H. B.; Scuseria, G. E.; Robb, M. A.; Cheeseman, J. R.; Scalmani, G.; Barone, V.; Petersson, G. A.; Nakatsuji, H.; Li, X.; Caricato, M.; Marenich, A. V.; Bloino, J.; Janesko, B. G.; Gomperts, R.; Mennucci, B.; Hratchian, H. P.; Ortiz, J. V.; Izmaylov, A. F.; Sonnenberg, J. L.; Williams-Young, D.; Ding, F.; Lipparini, F.; Egidi, F.; Goings, J.; Peng, B.; Petrone, A.; Henderson, T.; Ranasinghe, D.; Zakrzewski, V. G.; Gao, J.; Rega, N.; Zheng, G.; Liang, W.; Hada, M.; Ehara, M.; Toyota, K.; Fukuda, R.; Hasegawa, J.; Ishida, M.; Nakajima, T.; Honda, Y.; Kitao, O.; Nakai, H.; Vreven, T.; Throssell, K.; Montgomery, J. A., Jr.; Peralta, J. E.; Ogliaro, F.; Bearpark, M. J.; Heyd, J. J.; Brothers, E. N.; Kudin, K. N.; Staroverov, V. N.; Keith, T. A.; Kobayashi, R.; Normand, J.; Raghavachari, K.; Rendell, A. P.; Burant, J. C.; Iyengar, S. S.; Tomasi, J.; Cossi, M.; Millam, J. M.; Klene, M.; Adamo, C.; Cammi, R.; Ochterski, J. W.; Martin, R. L.; Morokuma, K.; Farkas, O.; Foresman, J. B.; Fox, D. J. Gaussian, Inc., Wallingford CT, 2016.
- [65] Texas Advanced Computing Center (TACC), The University of Texas at Austin.
- [66] Chemcraft - graphical software for visualization of quantum chemistry computations.  
<https://www.chemcraftprog.com>.
- [67] CYLview, 1.0b; Legault, C. Y., Université de Sherbrooke, 2009,  
(<http://www.cylview.org>).
- [68] Humphrey, W., Dalke, A. and Schulten, K. "VMD - Visual Molecular Dynamics", *J. Molec. Graphics*, **1996**, *14*, 33–38.

- [69] Zhao, Y., Truhlar, D. G. The M06 Suite of Density Functionals for Main Group Thermochemistry, Thermochemical Kinetics, Noncovalent Interactions, Excited States, and Transition Elements: Two New Functionals and Systematic Testing of Four M06-Class Functionals and 12 Other Functionals. *Theor. Chem. Acc.* **2008**, *120*, 215–241.
- [70] Eichkorn, K.; Weigend, F.; Truetler, O.; Ahlrichs, R.; Auxiliary Basis Sets for Main Row Atoms and Transition Metals and Their Use to Approximate Coulomb Potentials. *Theor. Chem. Acc.* **1997**, *97*, 119–124.
- [71] Weigend, F.; Accurate Coulomb-Fitting Basis Sets for H to Rn. *Phys. Chem. Chem. Phys.* **2006**, *8*, 1057–1065.
- [72] Marenich, A. V., Cramer, C. J., Truhlar, D. G. Universal Solvation Model Based on Solute Electron Density and on a Continuum Model of the Solvent Defined by the Bulk Dielectric Constant and Atomic Surface Tensions. *J. Phys. Chem. B.* **2009**, *113*, 6378–6396.
- [73] Grimme, S., Antony, J., Ehrlich, S., Krieg, H. A Consistent and Accurate *ab initio* Parameterization of Density Functional Dispersion Correction (DFT-D) for the 94 Elements H-Pu. *J. Chem. Phys.* **2010**, *132*, 154104-1–154104-19.
- [74] Becke, A. D. Density-Functional Thermochemistry. III. The Role of Exact Exchange. *J. Chem. Phys.* **1993**, *98*, 5648–5652.
- [75] Lee, C., Yang, W., Parr, R. G. Development of the Colle-Salvetti Correlation-Energy Formula into a Functional of the Electron Density. *Phys. Rev. B* **1988**, *37*, 785–789.
- [76] Vosko, S. H., Wilk, L., Nusair, M. Accurate Spin-Dependent Electron Liquid Correlation Energies for Local Spin Density Calculations: A Critical Analysis. *Can. J. Phys.* **1980**, *58*, 1200–1211.



- [77] Stephens, P. J., Devlin, F. J., Chabalowski, C. F., Frisch, M. J. Ab Initio Calculation of Vibrational Absorption and Circular Dichroism Spectra Using Density Functional Force Fields: A Comparison of Local, Nonlocal, and Hybrid Density Functionals. *J. Phys. Chem.* **1994**, *95*, 11623–11627.
- [78] Hehre, W. J., Ditchfield, R., Pople, J. A. Self-Consistent Molecular Orbital Methods. XII. Further Extensions of Gaussian-Type Basis Sets for Use in Molecular Orbital Studies of Organic Molecules. *J. Chem. Phys.* **1972**, *56*, 2257–2261.
- [79] Brémond, E.; Savarese, M.; Adamo, C.; Jacquemin, D.; Accuracy of TD-DFT Geometries: A Fresh Look. *J. Chem. Theory Comput.* **2018**, *14*, 3715–3727.
- [80] Fabrizio, A.; Corminboeuf, C.; How do London Dispersion Interactions Impact the Photochemical Processes of Molecular Switches? *J. Phys. Chem. Lett.* **2018**, *9*, 464–470.
- [81] Grimme, S.; Hansen, A.; Brandenburg, J. G.; Bannwarth, C.; Dispersion-Corrected Mean-Field Electronic Structure Methods. *Chem. Rev.* **2006**, *116*, 5105–5154.
- [82] (a) Marcus, R. A. On the Theory of Oxidation–Reduction Reactions Involving Electron Transfer. *J. Chem. Phys.* **1956**, *24*, 966–978. (b) Marcus, R. A. Electrostatic Free Energy and Other Properties of States Having Nonequilibrium Polarization. I. *J. Chem. Phys.* **1956**, *24*, 979–989. (c) Marcus, R. A. On the Theory of Oxidation–Reduction Reactions Involving Electron Transfer. III. Applications to Data on the Rates of Organic Redox Reactions. *J. Chem. Phys.* **1957**, *26*, 872–877. (d) Hush, N. S. Adiabatic Rate Processes at Electrodes. I. Energy–Charge Relationships. *J. Chem. Phys.* **1958**, *28*, 962–972. (e) Marcus, R. A. On the Theory of Electrochemical and Chemical Electron Transfer Processes. *Can. J. Chem.* **1959**, *37*, 155–163. (f) Hush, N. S. Adiabatic Theory of Outer Sphere Electron-Transfer Reactions in Solution. *Trans. Faraday Soc.* **1961**, *57*, 557–580. (g) Marcus, R. A. The Second RA Robinson Memorial Lecture. Electron, Proton and Related Transfers. *Faraday Discuss. Chem. Soc.* **1982**, *74*, 7–15. (h)

Marcus, R. A.; Sutin, N. Electron Transfers in Chemistry and Biology. *Biochim. Biophys. Acta, Rev. Bioenerg.* **1985**, *811*, 265–322.

[83] Costentin, C.; Robert, M.; Savéant, J.-M.; Electrochemical Concerted Proton and Electron Transfers. Potential-Dependent Rate Constant, Reorganization Factors, Proton Tunneling and Isotope Effects. *J. Electroanal. Chem.* **2006**, *2*, 197–206.

[84] Costentin, C.; Robert, M.; Saveant, J.-M.; Tard, C.; H-Bond Relays in Proton Coupled Electron Transfers. Oxidation of a Phenol Concerted with Proton Transport to a Distal Base through an OH Relay. *Phys. Chem. Chem. Phys.* **2011**, *13*, 5353–5358.
